# Supplementary material for: Soma-to-Germline miRNA inheritance via Yolk Promotes Stress Resilience in Progeny
Source: Research Square preprint supplement (doi:10.21203/rs.3.rs-4711258/v1), 2025-07-09
Supplement: Supplementary file 1 [file 1591f98495b9aa7d439b0f5d.xlsx]

## Sheet: Supplementary Table 3
Supplementary Table 3. DE miRNAs in 2-cell embryos from yolk-depleted mothers, intestinal DP-depleted young adults and 2-cell embryos, and 2-cell embryos from day 1 to day 3 wild-type mothers.

## Sheet: 2C-E rme-2 degron miRNAs piRNAs
2-cell embryo (2C-E) miRNAs and piRNAs in rme-2 degron PhIAA vs control
miRNA in bold correspond to DE miRNAs (log2 fold change ≤ -0.5 or ≥ 0.5 and FDR ≤ 0.05), Yolk-enriched miRNAs are labelled in green. Results from three biological replicates.
Name	type	log2(FC)	FDR
mir-230-3p	miRNA	6.16747	0.0205233
mir-237-5p	miRNA	3.64437	5.00588e-06
mir-85-3p	miRNA	3.52254	0.0129977
mir-240-3p	miRNA	3.01648	0.00107534
let-7-5p	miRNA	2.98442	3.71405e-07
mir-48-5p	miRNA	2.76301	1.68044e-07
mir-70-3p	miRNA	2.70942	3.29476e-12
mir-786-3p	miRNA	2.69689	0.0320086
lin-4-5p	miRNA	2.57771	0.0152767
mir-81-3p	miRNA	2.57565	2.56521e-27
mir-235-3p	miRNA	2.21808	1.71192e-05
mir-1-3p	miRNA	1.96282	0.0166105
mir-82-3p	miRNA	1.72965	1.29763e-18
mir-228-5p	miRNA	1.55563	8.09186e-13
mir-57-5p	miRNA	1.378	3.89621e-08
mir-49-3p	miRNA	1.29737	9.38925e-05
mir-58.1-3p	miRNA	1.27851	3.19797e-18
mir-80-3p	miRNA	1.00381	3.09616e-10
mir-52-5p	miRNA	0.605366	1.51746e-07
mir-71-5p	miRNA	0.385824	0.048149
mir-36-3p	miRNA	3.56192e-05	0.906462
mir-37-3p	miRNA	-0.0156836	0.898128
mir-38-3p	miRNA	-0.218624	0.954957
mir-40-3p	miRNA	-0.00693154	0.855987
mir-41-3p	miRNA	-0.143344	0.976763
mir-42-3p	miRNA	0.296039	0.960404
mir-259-5p	miRNA	0	1
mir-355-5p	miRNA	-0.77072	0.947124
mir-75-3p	miRNA	0	1
mir-795-5p	miRNA	-0.838692	0.98972
mir-124-3p	miRNA	3.19586	0.912581
mir-231-3p	miRNA	0.343141	0.860052
mir-232-3p	miRNA	0.760033	0.835407
mir-233-3p	miRNA	2.89449	0.325397
mir-234-3p	miRNA	1.33899	0.837709
mir-236-3p	miRNA	1.0575	0.984118
mir-238-3p	miRNA	1.09402	0.400338
mir-239.1-5p	miRNA	1.69149	0.830297
mir-239.2-5p	miRNA	0	1
mir-2-3p	miRNA	2.05825	0.907562
mir-241-3p	miRNA	3.49642	0.982278
mir-241-5p	miRNA	0.72057	0.956057
mir-242-5p	miRNA	2.19774	0.956061
mir-243-3p	miRNA	0.666116	0.856956
mir-244-5p	miRNA	1.87335	0.260374
mir-245-3p	miRNA	2.49801	0.84821
mir-246-3p	miRNA	1.43593	0.0516357
mir-248-3p	miRNA	0	1
mir-250-3p	miRNA	0.0484259	0.87898
mir-252-5p	miRNA	3.59586	0.816568
mir-253-3p	miRNA	-0.0369268	0.921169
mir-34-5p	miRNA	4.39378	0.554108
mir-356.2-3p	miRNA	2.02512	0.986438
mir-44-3p	miRNA	0.169012	0.990418
mir-45-3p	miRNA	0.151779	0.844115
mir-46-3p	miRNA	3.8484	0.950576
mir-46-5p	miRNA	2.41209	0.917399
mir-47-3p	miRNA	0.956831	0.812575
mir-47-5p	miRNA	1.18449	0.965853
mir-51-5p	miRNA	0.0367396	0.0898902
mir-53-5p	miRNA	0.000414569	0.949451
mir-55-3p	miRNA	0.342961	0.546753
mir-56-3p	miRNA	0.234321	0.957818
mir-58.1-5p	miRNA	0.426781	0.903651
mir-59-3p	miRNA	1.2253	0.953487
mir-60-3p	miRNA	3.13111	0.798815
mir-63-3p	miRNA	2.34129	0.965382
mir-64-5p	miRNA	0.0458415	0.8755
mir-65-5p	miRNA	0.133345	0.940242
mir-66-5p	miRNA	-0.107819	0.936099
mir-67-3p	miRNA	4.8054	0.248546
mir-35-3p	miRNA	-0.054161	0.000189343
mir-72-5p	miRNA	0.047762	0.967081
mir-73-3p	miRNA	-0.01005	0.892059
mir-74-3p	miRNA	-0.124798	0.972753
mir-76-3p	miRNA	3.50442	0.0667804
mir-77-3p	miRNA	1.0369	0.834242
mir-77-5p	miRNA	3.35533	0.866105
mir-79-3p	miRNA	0.715111	0.881478
mir-80-5p	miRNA	1.51603	0.764765
mir-83-3p	miRNA	-0.772983	0.830798
mir-84-5p	miRNA	3.74698	0.13476
mir-86-5p	miRNA	1.6693	0.321297
mir-90-3p	miRNA	0.00120225	0.948997
mir-35-5p	miRNA	-0.746129	0.9331
mir-37-5p	miRNA	-0.772931	0.875263
mir-38-5p	miRNA	0.0674512	0.809217
mir-39-3p	miRNA	-0.150518	0.026575
mir-39-5p	miRNA	-1.25697	0.760898
mir-40-5p	miRNA	0.844258	0.891465
mir-41-5p	miRNA	0.183132	0.946601
mir-42-5p	miRNA	0.370315	0.937425
mir-36-5p	miRNA	-2.84385	0.897435
F39B1.3-5p	miRNA	0	1
let-7-3p	miRNA	0	1
lin-4-3p	miRNA	0	1
lsy-6-5p	miRNA	0	1
mir-1018-3p	miRNA	-1.89341	0.882791
mir-1019-3p	miRNA	0	1
mir-1019-5p	miRNA	0	1
mir-1020-3p	miRNA	0	1
mir-1020-5p	miRNA	0	1
mir-1021-5p	miRNA	0	1
mir-1022-3p	miRNA	0	1
mir-124-5p	miRNA	2.17007	0.918705
mir-1817-5p	miRNA	0	1
mir-1818-5p	miRNA	0	1
mir-48-3p	miRNA	-0.927679	0.795648
mir-1819-5p	miRNA	0	1
mir-1820-3p	miRNA	0	1
mir-1820-5p	miRNA	0	1
mir-1821-3p	miRNA	0	1
mir-1821-5p	miRNA	0	1
mir-1822-3p	miRNA	1.69239	0.914668
lsy-6-3p	miRNA	0	1
mir-1022-5p	miRNA	0	1
mir-1823-5p	miRNA	0	1
mir-1824-3p	miRNA	0	1
mir-1824-5p	miRNA	0	1
mir-1828-3p	miRNA	0	1
mir-1829.1-3p	miRNA	1.70666	0.899282
mir-1829.1-5p	miRNA	0.41163	0.974244
mir-1829.2-3p	miRNA	0	1
mir-1829.2-5p	miRNA	-0.574386	0.954161
mir-1829.3-3p	miRNA	1.6803	0.879651
mir-1829.3-5p	miRNA	-0.00694795	0.818067
mir-1830-3p	miRNA	2.28	0.963904
mir-1830-5p	miRNA	0	1
mir-1-5p	miRNA	0	1
mir-1819-3p	miRNA	0	1
mir-1832.2-3p	miRNA	0	1
mir-1832.2-5p	miRNA	0	1
mir-1833-3p	miRNA	0	1
mir-2207-3p	miRNA	0	1
mir-2207-5p	miRNA	0	1
mir-2208.1-3p	miRNA	0	1
mir-1822-5p	miRNA	1.94211	0.842598
mir-2208.2-3p	miRNA	0	1
mir-2208.2-5p	miRNA	0	1
mir-2209.1-3p	miRNA	-0.423721	0.918112
mir-2209.1-5p	miRNA	0	1
mir-2209.2-3p	miRNA	0	1
mir-2209.2-5p	miRNA	0	1
mir-2209.3-3p	miRNA	1.12007	0.813337
mir-1823-3p	miRNA	0	1
mir-2210-3p	miRNA	0	1
mir-2210-5p	miRNA	0	1
mir-2211-3p	miRNA	0	1
mir-2211-5p	miRNA	0	1
mir-2212-3p	miRNA	0	1
mir-2212-5p	miRNA	0.036205	0.956295
mir-2213-3p	miRNA	0	1
mir-2213-5p	miRNA	0	1
mir-2214-3p	miRNA	0.412417	0.968218
mir-2214-5p	miRNA	0.207051	0.89473
mir-2215-3p	miRNA	0	1
mir-2215-5p	miRNA	0	1
mir-2216-3p	miRNA	0	1
mir-2216-5p	miRNA	0	1
mir-1832.1-3p	miRNA	0	1
mir-2217.1-5p	miRNA	0	1
mir-2217.2-3p	miRNA	0	1
mir-2217.2-5p	miRNA	0	1
mir-2217.3-3p	miRNA	0	1
mir-2217.3-5p	miRNA	0	1
mir-2217.4-3p	miRNA	0	1
mir-2217.4-5p	miRNA	0	1
mir-2217.5-3p	miRNA	0	1
mir-2217.5-5p	miRNA	0	1
mir-1832.1-5p	miRNA	0.428984	0.799123
mir-2218.1-5p	miRNA	0	1
mir-2218.2-3p	miRNA	0	1
mir-2218.2-5p	miRNA	0	1
mir-2219-3p	miRNA	3.34595	0.974894
mir-2219-5p	miRNA	0	1
mir-2208.1-5p	miRNA	-0.250188	0.810972
mir-2220-5p	miRNA	0	1
mir-2221-3p	miRNA	0	1
mir-2209.3-5p	miRNA	2.00616	0.831414
mir-229-3p	miRNA	-0.787103	0.93852
mir-229-5p	miRNA	-0.213717	0.852603
mir-2217.1-3p	miRNA	0	1
mir-2218.1-3p	miRNA	0	1
mir-232-5p	miRNA	0	1
mir-2220-3p	miRNA	0	1
mir-234-5p	miRNA	0	1
mir-228-3p	miRNA	0	1
mir-230-5p	miRNA	0	1
mir-231-5p	miRNA	0	1
mir-233-5p	miRNA	0	1
mir-239.1-3p	miRNA	0	1
mir-239.2-3p	miRNA	0	1
mir-235-5p	miRNA	0	1
mir-243-5p	miRNA	0.463121	0.961244
mir-244-3p	miRNA	0	1
mir-245-5p	miRNA	0	1
mir-246-5p	miRNA	0	1
mir-247-3p	miRNA	0	1
mir-247-5p	miRNA	0	1
mir-249-3p	miRNA	0.994433	0.963767
mir-249-5p	miRNA	0	1
mir-250-5p	miRNA	-0.175112	0.894551
mir-251-5p	miRNA	2.89407	0.805241
mir-252-3p	miRNA	0	1
mir-253-5p	miRNA	0	1
mir-254-3p	miRNA	3.30774	0.844652
mir-254-5p	miRNA	0	1
mir-255-3p	miRNA	0	1
mir-255-5p	miRNA	0	1
mir-256-3p	miRNA	0	1
mir-257-5p	miRNA	0.323075	0.801927
mir-258.1-5p	miRNA	0	1
mir-258.2-5p	miRNA	0	1
mir-259-3p	miRNA	0	1
mir-2-5p	miRNA	0.140997	0.928369
mir-260-3p	miRNA	0.784543	0.800082
mir-261-3p	miRNA	0	1
mir-236-5p	miRNA	0	1
mir-264-3p	miRNA	0	1
mir-265-3p	miRNA	0	1
mir-266-5p	miRNA	0	1
mir-267-5p	miRNA	0	1
mir-268-5p	miRNA	0	1
mir-269-5p	miRNA	0	1
mir-270-3p	miRNA	0	1
mir-271-5p	miRNA	0	1
mir-272-3p	miRNA	0	1
mir-273-3p	miRNA	0	1
mir-2953-3p	miRNA	0	1
mir-2953-5p	miRNA	0	1
mir-237-3p	miRNA	0	1
mir-353-5p	miRNA	1.0023	0.805001
mir-354-3p	miRNA	3.06607	0.798806
mir-355-3p	miRNA	0	1
mir-356.1-5p	miRNA	0	1
mir-356.2-5p	miRNA	0	1
mir-357-3p	miRNA	0	1
mir-357-5p	miRNA	0	1
mir-238-5p	miRNA	-1.02156	0.946578
mir-358-5p	miRNA	0	1
mir-240-5p	miRNA	-2.52844	0.8906
mir-360-3p	miRNA	0	1
mir-360-5p	miRNA	0	1
mir-262-3p	miRNA	0	1
mir-392-3p	miRNA	0	1
mir-34-3p	miRNA	0	1
mir-358-3p	miRNA	-0.122491	0.919816
mir-43-3p	miRNA	0.21103	0.956096
mir-359-3p	miRNA	0	1
mir-44-5p	miRNA	-1.05177	0.808789
mir-392-5p	miRNA	0	1
mir-43-5p	miRNA	-2.22444	0.890736
mir-4805-3p	miRNA	0	1
mir-4805-5p	miRNA	0	1
mir-4806-3p	miRNA	0	1
mir-4806-5p	miRNA	0	1
mir-4807-3p	miRNA	-0.310815	0.970337
mir-45-5p	miRNA	0	1
mir-4808-5p	miRNA	0	1
mir-4808-3p	miRNA	0	1
mir-4809-5p	miRNA	0	1
mir-4809-3p	miRNA	-0.302925	0.847573
mir-4810.2-3p	miRNA	0	1
mir-4810.2-5p	miRNA	0	1
mir-4811-3p	miRNA	0	1
mir-4811-5p	miRNA	0	1
mir-4812-3p	miRNA	0	1
mir-4812-5p	miRNA	5.1618	0.479408
mir-4813-3p	miRNA	0.701557	0.829694
mir-4810.1-3p	miRNA	0	1
mir-4814-3p	miRNA	0	1
mir-4814-5p	miRNA	0	1
mir-4815-3p	miRNA	0	1
mir-4916-3p	miRNA	-0.285199	0.83071
mir-4916-5p	miRNA	0.46779	0.832745
mir-4920-5p	miRNA	0	1
mir-4921-3p	miRNA	0	1
mir-4922.1-3p	miRNA	0	1
mir-4922.2-3p	miRNA	0	1
mir-4923.1-3p	miRNA	0	1
mir-4923.2-3p	miRNA	0.866757	0.91289
mir-4924-5p	miRNA	0	1
mir-4925-3p	miRNA	0	1
mir-4926-5p	miRNA	2.35011	0.901014
mir-4927-5p	miRNA	0	1
mir-4929-3p	miRNA	0	1
mir-4930-5p	miRNA	0	1
mir-4931-3p	miRNA	0	1
mir-4932-5p	miRNA	0	1
mir-4933-5p	miRNA	0	1
mir-4934-3p	miRNA	0	1
mir-4935-5p	miRNA	0	1
mir-4936-3p	miRNA	-0.0163879	0.921446
mir-4937-5p	miRNA	1.98636	0.908056
mir-4813-5p	miRNA	0	1
mir-49-5p	miRNA	0.311348	0.96218
mir-50-3p	miRNA	0	1
mir-50-5p	miRNA	-0.0952803	0.909384
mir-51-3p	miRNA	-0.85812	0.855692
mir-52-3p	miRNA	0.777527	0.799942
mir-4938-5p	miRNA	0	1
mir-54-3p	miRNA	0.325315	0.849123
mir-54-5p	miRNA	0.464684	0.919936
mir-53-3p	miRNA	0	1
mir-5545-3p	miRNA	0	1
mir-5546-3p	miRNA	-0.185987	0.84148
mir-5546-5p	miRNA	0	1
mir-5545-5p	miRNA	0	1
mir-5547-5p	miRNA	0	1
mir-5548-3p	miRNA	0	1
mir-5548-5p	miRNA	0	1
mir-5549-3p	miRNA	0.764841	0.834733
mir-5549-5p	miRNA	-0.462584	0.865739
mir-5547-3p	miRNA	0	1
mir-5550-5p	miRNA	0	1
mir-5551-3p	miRNA	0	1
mir-5551-5p	miRNA	-1.19882	0.843145
mir-5552-3p	miRNA	0	1
mir-5552-5p	miRNA	0	1
mir-5553-3p	miRNA	0	1
mir-5553-5p	miRNA	0	1
mir-5550-3p	miRNA	0	1
mir-5592.1-3p	miRNA	1.50125	0.837146
mir-55-5p	miRNA	0	1
mir-5592.2-3p	miRNA	1.23655	0.890943
mir-5592.2-5p	miRNA	0	1
mir-5593.1-3p	miRNA	0	1
mir-5593.1-5p	miRNA	0	1
mir-5593.2-3p	miRNA	0	1
mir-5593.2-5p	miRNA	0	1
mir-5592.1-5p	miRNA	0.672791	0.904906
mir-5594-5p	miRNA	0	1
mir-5594-3p	miRNA	0	1
mir-5595-5p	miRNA	0	1
mir-56-5p	miRNA	-2.49457	0.809449
mir-57-3p	miRNA	0	1
mir-58.2-3p	miRNA	0	1
mir-58.2-5p	miRNA	2.356	0.82162
miR58Synth	miRNA	0	1
mir-5595-3p	miRNA	0	1
mir-59-5p	miRNA	0	1
mir-61-3p	miRNA	0.0407773	0.960524
mir-61-5p	miRNA	0.166663	0.793371
mir-60-5p	miRNA	0	1
mir-63-5p	miRNA	4.34538	0.829565
mir-62-3p	miRNA	1.30767	0.863883
mir-64-3p	miRNA	-2.83919	0.796423
mir-66-3p	miRNA	3.80031	0.853822
mir-67-5p	miRNA	1.84483	0.991264
mir-70-5p	miRNA	0	1
mir-71-3p	miRNA	1.05192	0.818567
mir-72-3p	miRNA	0.179099	0.878526
mir-73-5p	miRNA	2.59641	0.912894
mir-74-5p	miRNA	-1.06039	0.871686
mir-65-3p	miRNA	-0.452037	0.944786
mir-76-5p	miRNA	0	1
mir-78-3p	miRNA	0	1
mir-784-3p	miRNA	0	1
mir-75-5p	miRNA	0	1
mir-785-3p	miRNA	0	1
mir-785-5p	miRNA	0	1
mir-786-5p	miRNA	0	1
mir-787-3p	miRNA	0	1
mir-787-5p	miRNA	0	1
mir-784-5p	miRNA	1.94211	0.8629
mir-788-5p	miRNA	0	1
mir-789.1-3p	miRNA	0	1
mir-789.1-5p	miRNA	0	1
mir-789.2-3p	miRNA	0	1
mir-788-3p	miRNA	0	1
mir-790-3p	miRNA	0	1
mir-790-5p	miRNA	0	1
mir-789.2-5p	miRNA	-0.622306	0.873909
mir-791-5p	miRNA	0	1
mir-792-3p	miRNA	0	1
mir-792-5p	miRNA	0	1
mir-793-3p	miRNA	-1.94534	0.975236
mir-791-3p	miRNA	0	1
mir-794-3p	miRNA	0	1
mir-794-5p	miRNA	0	1
mir-795-3p	miRNA	0	1
mir-79-5p	miRNA	3.63483	0.465034
mir-796-5p	miRNA	-0.581954	0.803915
mir-797-3p	miRNA	0	1
mir-797-5p	miRNA	0	1
mir-798-3p	miRNA	0.73073	0.881705
mir-799-3p	miRNA	0	1
mir-800-3p	miRNA	0	1
mir-800-5p	miRNA	0	1
mir-81-5p	miRNA	0	1
mir-8186.1-3p	miRNA	0	1
mir-8186.1-5p	miRNA	0	1
mir-8186.2-3p	miRNA	0	1
mir-8186.2-5p	miRNA	0	1
mir-8187-3p	miRNA	0	1
mir-8187-5p	miRNA	0	1
mir-8188-3p	miRNA	0	1
mir-8188-5p	miRNA	0	1
mir-8189-3p	miRNA	0	1
mir-8189-5p	miRNA	0	1
mir-8190-3p	miRNA	0	1
mir-8190-5p	miRNA	0	1
mir-8191-3p	miRNA	0	1
mir-8191-5p	miRNA	0.341199	0.82374
mir-8192-3p	miRNA	0	1
mir-8192-5p	miRNA	0	1
mir-8193-3p	miRNA	0	1
mir-8193-5p	miRNA	0	1
mir-8194-3p	miRNA	0	1
mir-8194-5p	miRNA	0	1
mir-8195-3p	miRNA	0	1
mir-8195-5p	miRNA	0	1
mir-8196.1-3p	miRNA	0	1
mir-8196.1-5p	miRNA	-0.559298	0.840862
mir-8196.2-3p	miRNA	0.626276	0.932338
mir-8196.2-5p	miRNA	-3.19265	0.957131
mir-8197-3p	miRNA	0	1
mir-8197-5p	miRNA	0	1
mir-8198-5p	miRNA	0	1
mir-8200-3p	miRNA	0	1
mir-8200-5p	miRNA	0	1
mir-8201-3p	miRNA	0	1
mir-8201-5p	miRNA	-2.49457	0.839009
mir-8202-3p	miRNA	0	1
mir-8203-3p	miRNA	0	1
mir-8203-5p	miRNA	0	1
mir-8204-3p	miRNA	0	1
mir-8204-5p	miRNA	0	1
mir-8205-3p	miRNA	-2.56612	0.948505
mir-8205-5p	miRNA	0.202474	0.941269
mir-8206-3p	miRNA	0	1
mir-8206-5p	miRNA	0	1
mir-8207-3p	miRNA	0	1
mir-8207-5p	miRNA	0	1
mir-8208-3p	miRNA	0	1
mir-8208-5p	miRNA	0	1
mir-8209-3p	miRNA	0	1
mir-8209-5p	miRNA	0	1
mir-8210-3p	miRNA	0	1
mir-8210-5p	miRNA	0	1
mir-8211-3p	miRNA	0	1
mir-8211-5p	miRNA	0	1
mir-8212-3p	miRNA	0	1
mir-8212-5p	miRNA	0	1
mir-84-3p	miRNA	0	1
mir-82-5p	miRNA	0	1
mir-83-5p	miRNA	0	1
mir-85-5p	miRNA	0	1
mir-86-3p	miRNA	-0.0685237	0.840347
mir-87-3p	miRNA	0.921493	0.969534
mir-87-5p	miRNA	-0.149654	0.849528
mir-90-5p	miRNA	2.54265	0.948443
21ur-1	piRNA	0	1
21ur-10	piRNA	-1.66203	0.81457
21ur-100	piRNA	-0.318952	0.839713
21ur-1000	piRNA	-0.57858	0.795076
21ur-10000	piRNA	0	1
21ur-10001	piRNA	0	1
21ur-10002	piRNA	0	1
21ur-10003	piRNA	0	1
21ur-10004	piRNA	0	1
21ur-10005	piRNA	0	1
21ur-10007	piRNA	0	1
21ur-10008	piRNA	0	1
21ur-10009	piRNA	0	1
21ur-1001	piRNA	0.215457	0.80757
21ur-10010	piRNA	0	1
21ur-10011	piRNA	0	1
21ur-10012	piRNA	-0.389951	0.937308
21ur-10013	piRNA	0	1
21ur-10014	piRNA	0	1
21ur-10015	piRNA	0	1
21ur-10016	piRNA	0	1
21ur-10017	piRNA	0	1
21ur-10018	piRNA	0	1
21ur-10019	piRNA	0	1
21ur-1002	piRNA	2.17529	0.960802
21ur-10020	piRNA	0	1
21ur-10021	piRNA	0	1
21ur-10022	piRNA	-1.55655	0.915732
21ur-10023	piRNA	0	1
21ur-10024	piRNA	0	1
21ur-10025	piRNA	0	1
21ur-10026	piRNA	0	1
21ur-10027	piRNA	0	1
21ur-10029	piRNA	-0.817312	0.83005
21ur-1003	piRNA	0	1
21ur-10030	piRNA	0	1
21ur-10031	piRNA	0	1
21ur-10032	piRNA	-1.97012	0.946144
21ur-10033	piRNA	0	1
21ur-10034	piRNA	0	1
21ur-10035	piRNA	0	1
21ur-10036	piRNA	0	1
21ur-10037	piRNA	0	1
21ur-10038	piRNA	0	1
21ur-10039	piRNA	0	1
21ur-1004	piRNA	0	1
21ur-10040	piRNA	0	1
21ur-10042	piRNA	0	1
21ur-10043	piRNA	0	1
21ur-10044	piRNA	0	1
21ur-10045	piRNA	0	1
21ur-10046	piRNA	0	1
21ur-10047	piRNA	0	1
21ur-10048	piRNA	0.997946	0.854172
21ur-10049	piRNA	0	1
21ur-1005	piRNA	-0.0683965	0.81652
21ur-10050	piRNA	0	1
21ur-10051	piRNA	0	1
21ur-10052	piRNA	0	1
21ur-10053	piRNA	0	1
21ur-10054	piRNA	0	1
21ur-10055	piRNA	0	1
21ur-10056	piRNA	0	1
21ur-10057	piRNA	0	1
21ur-10058	piRNA	0	1
21ur-10059	piRNA	0	1
21ur-1006	piRNA	2.00616	0.905768
21ur-10060	piRNA	0	1
21ur-10061	piRNA	0	1
21ur-10062	piRNA	0	1
21ur-10063	piRNA	0	1
21ur-10064	piRNA	0	1
21ur-10065	piRNA	0	1
21ur-10066	piRNA	0	1
21ur-10067	piRNA	0	1
21ur-10068	piRNA	0	1
21ur-10069	piRNA	0	1
21ur-1007	piRNA	0	1
21ur-10070	piRNA	0	1
21ur-10071	piRNA	0	1
21ur-10072	piRNA	0	1
21ur-10073	piRNA	0.90257	0.933439
21ur-10074	piRNA	0	1
21ur-10075	piRNA	0	1
21ur-10076	piRNA	0	1
21ur-10077	piRNA	0	1
21ur-10078	piRNA	-1.45701	0.929108
21ur-10079	piRNA	0	1
21ur-1008	piRNA	0	1
21ur-10080	piRNA	0	1
21ur-10081	piRNA	0	1
21ur-10082	piRNA	0	1
21ur-10083	piRNA	0	1
21ur-10084	piRNA	0	1
21ur-10085	piRNA	0	1
21ur-10086	piRNA	0	1
21ur-10087	piRNA	0	1
21ur-10088	piRNA	-0.700903	0.802731
21ur-10089	piRNA	0	1
21ur-1009	piRNA	-0.594503	0.901491
21ur-10091	piRNA	0	1
21ur-10092	piRNA	0	1
21ur-10093	piRNA	0	1
21ur-10094	piRNA	0	1
21ur-10095	piRNA	0	1
21ur-10096	piRNA	0	1
21ur-10097	piRNA	1.87376	0.965636
21ur-10098	piRNA	0	1
21ur-10099	piRNA	0	1
21ur-101	piRNA	0	1
21ur-1010	piRNA	0	1
21ur-10100	piRNA	0	1
21ur-10101	piRNA	0	1
21ur-10102	piRNA	0	1
21ur-10103	piRNA	0	1
21ur-10104	piRNA	0	1
21ur-10105	piRNA	0	1
21ur-10106	piRNA	0	1
21ur-10107	piRNA	0	1
21ur-10108	piRNA	0	1
21ur-10109	piRNA	0	1
21ur-1011	piRNA	4.26191	0.822481
21ur-10110	piRNA	0	1
21ur-10111	piRNA	0	1
21ur-10112	piRNA	-0.186195	0.903236
21ur-10113	piRNA	0	1
21ur-10114	piRNA	1.94211	0.965655
21ur-10115	piRNA	0	1
21ur-10116	piRNA	0	1
21ur-10117	piRNA	0	1
21ur-10118	piRNA	0	1
21ur-10119	piRNA	0	1
21ur-1012	piRNA	0	1
21ur-10120	piRNA	0	1
21ur-10121	piRNA	0	1
21ur-10122	piRNA	-2.49457	0.91449
21ur-10123	piRNA	0	1
21ur-10124	piRNA	0	1
21ur-10125	piRNA	0	1
21ur-10126	piRNA	0	1
21ur-10127	piRNA	0	1
21ur-10128	piRNA	0	1
21ur-10129	piRNA	0	1
21ur-1013	piRNA	0.384485	0.944632
21ur-10130	piRNA	0	1
21ur-10131	piRNA	0	1
21ur-10132	piRNA	0	1
21ur-10134	piRNA	0	1
21ur-10135	piRNA	0	1
21ur-10136	piRNA	0	1
21ur-10137	piRNA	0	1
21ur-10138	piRNA	0	1
21ur-10139	piRNA	0	1
21ur-1014	piRNA	4.08009	0.861055
21ur-10140	piRNA	0	1
21ur-10141	piRNA	0	1
21ur-10142	piRNA	0	1
21ur-10143	piRNA	0	1
21ur-10144	piRNA	0	1
21ur-10145	piRNA	0	1
21ur-10146	piRNA	0	1
21ur-10147	piRNA	0	1
21ur-10148	piRNA	0	1
21ur-10149	piRNA	0	1
21ur-1015	piRNA	0	1
21ur-10150	piRNA	0	1
21ur-10151	piRNA	0	1
21ur-10152	piRNA	0	1
21ur-10153	piRNA	0	1
21ur-10154	piRNA	-1.80798	0.92747
21ur-10155	piRNA	0	1
21ur-10156	piRNA	0	1
21ur-10157	piRNA	0	1
21ur-10158	piRNA	0	1
21ur-10159	piRNA	0	1
21ur-1016	piRNA	0	1
21ur-10160	piRNA	-3.51582	0.982441
21ur-10161	piRNA	0	1
21ur-10162	piRNA	0	1
21ur-10163	piRNA	0	1
21ur-10164	piRNA	0	1
21ur-10165	piRNA	0	1
21ur-10166	piRNA	0	1
21ur-10167	piRNA	0	1
21ur-10168	piRNA	0	1
21ur-10169	piRNA	0.971655	0.965783
21ur-1017	piRNA	0	1
21ur-10170	piRNA	0	1
21ur-10171	piRNA	3.51202	0.894647
21ur-10172	piRNA	0	1
21ur-10173	piRNA	0	1
21ur-10174	piRNA	0	1
21ur-10175	piRNA	0	1
21ur-10176	piRNA	-3.19265	0.986254
21ur-10177	piRNA	0	1
21ur-10179	piRNA	0	1
21ur-1018	piRNA	0	1
21ur-10180	piRNA	0.034639	0.973026
21ur-10181	piRNA	0	1
21ur-10183	piRNA	0	1
21ur-10184	piRNA	0	1
21ur-10185	piRNA	-3.86178	0.897086
21ur-10186	piRNA	0	1
21ur-10187	piRNA	0	1
21ur-10188	piRNA	1.88791	0.982227
21ur-10189	piRNA	0	1
21ur-1019	piRNA	0	1
21ur-10190	piRNA	-0.649796	0.880072
21ur-10191	piRNA	0	1
21ur-10193	piRNA	0	1
21ur-10194	piRNA	0	1
21ur-10195	piRNA	0	1
21ur-10196	piRNA	0	1
21ur-10197	piRNA	0	1
21ur-10198	piRNA	0	1
21ur-10199	piRNA	1.31376	0.825493
21ur-102	piRNA	0	1
21ur-1020	piRNA	0	1
21ur-10200	piRNA	0	1
21ur-10201	piRNA	-2.94877	0.862458
21ur-10202	piRNA	0	1
21ur-10204	piRNA	0	1
21ur-10205	piRNA	0	1
21ur-10206	piRNA	0	1
21ur-10207	piRNA	0	1
21ur-10208	piRNA	0	1
21ur-10209	piRNA	0	1
21ur-1021	piRNA	0	1
21ur-10210	piRNA	0	1
21ur-10211	piRNA	0	1
21ur-10212	piRNA	0	1
21ur-10213	piRNA	0	1
21ur-10214	piRNA	0	1
21ur-10215	piRNA	-1.44764	0.882886
21ur-10216	piRNA	0	1
21ur-10217	piRNA	0	1
21ur-10218	piRNA	-0.197846	0.954535
21ur-10219	piRNA	0	1
21ur-1022	piRNA	0	1
21ur-10220	piRNA	0	1
21ur-10221	piRNA	0	1
21ur-10222	piRNA	0	1
21ur-10223	piRNA	0	1
21ur-10224	piRNA	0	1
21ur-10225	piRNA	0	1
21ur-10226	piRNA	0	1
21ur-10228	piRNA	0	1
21ur-10229	piRNA	0	1
21ur-1023	piRNA	3.28328	0.827203
21ur-10230	piRNA	0	1
21ur-10231	piRNA	0	1
21ur-10232	piRNA	0	1
21ur-10233	piRNA	0	1
21ur-10234	piRNA	0	1
21ur-10235	piRNA	0	1
21ur-10236	piRNA	0	1
21ur-10237	piRNA	0	1
21ur-10238	piRNA	0	1
21ur-10239	piRNA	0	1
21ur-1024	piRNA	0	1
21ur-10240	piRNA	0	1
21ur-10241	piRNA	0.694468	0.974242
21ur-10242	piRNA	0	1
21ur-10243	piRNA	-1.78012	0.808229
21ur-10244	piRNA	0	1
21ur-10245	piRNA	0	1
21ur-10246	piRNA	0	1
21ur-10247	piRNA	0	1
21ur-10248	piRNA	0	1
21ur-10249	piRNA	0	1
21ur-1025	piRNA	0	1
21ur-10250	piRNA	0	1
21ur-10252	piRNA	0	1
21ur-10254	piRNA	0	1
21ur-10255	piRNA	0	1
21ur-10256	piRNA	0	1
21ur-10257	piRNA	0	1
21ur-10258	piRNA	0	1
21ur-10259	piRNA	0	1
21ur-1026	piRNA	0	1
21ur-10260	piRNA	0	1
21ur-10261	piRNA	0	1
21ur-10262	piRNA	0	1
21ur-10263	piRNA	0	1
21ur-10264	piRNA	0	1
21ur-10265	piRNA	0	1
21ur-10266	piRNA	0	1
21ur-10267	piRNA	0	1
21ur-10268	piRNA	0	1
21ur-10269	piRNA	0	1
21ur-1027	piRNA	0	1
21ur-10270	piRNA	0	1
21ur-10271	piRNA	0	1
21ur-10273	piRNA	0	1
21ur-10274	piRNA	0	1
21ur-10275	piRNA	0	1
21ur-10276	piRNA	0	1
21ur-10277	piRNA	0	1
21ur-10278	piRNA	0	1
21ur-10279	piRNA	0	1
21ur-1028	piRNA	-3.10296	0.987069
21ur-10280	piRNA	0	1
21ur-10281	piRNA	0	1
21ur-10282	piRNA	0	1
21ur-10283	piRNA	0	1
21ur-10284	piRNA	0	1
21ur-10285	piRNA	0	1
21ur-10286	piRNA	0	1
21ur-10287	piRNA	0	1
21ur-10289	piRNA	0	1
21ur-1029	piRNA	0	1
21ur-10290	piRNA	0	1
21ur-10291	piRNA	0	1
21ur-10292	piRNA	2.26174	0.793598
21ur-10293	piRNA	-3.61645	0.967074
21ur-10294	piRNA	0	1
21ur-10295	piRNA	0	1
21ur-10296	piRNA	0	1
21ur-10297	piRNA	0	1
21ur-10298	piRNA	0	1
21ur-10299	piRNA	0.851208	0.968
21ur-103	piRNA	0.2376	0.849483
21ur-1030	piRNA	0	1
21ur-10300	piRNA	0	1
21ur-10301	piRNA	0	1
21ur-10302	piRNA	0	1
21ur-10303	piRNA	0	1
21ur-10304	piRNA	-2.54817	0.798549
21ur-10305	piRNA	0.828151	0.848197
21ur-10306	piRNA	0	1
21ur-10307	piRNA	0	1
21ur-10308	piRNA	0	1
21ur-10309	piRNA	0	1
21ur-1031	piRNA	0	1
21ur-10310	piRNA	-1.81036	0.848805
21ur-10311	piRNA	0	1
21ur-10312	piRNA	-1.19622	0.957133
21ur-10313	piRNA	0	1
21ur-10316	piRNA	0	1
21ur-10317	piRNA	0	1
21ur-10318	piRNA	0.331362	0.829319
21ur-10319	piRNA	0	1
21ur-1032	piRNA	-2.05059	0.984185
21ur-10320	piRNA	0	1
21ur-10321	piRNA	-0.534486	0.971342
21ur-10322	piRNA	0	1
21ur-10324	piRNA	0	1
21ur-10325	piRNA	0	1
21ur-10326	piRNA	0	1
21ur-10327	piRNA	0	1
21ur-10328	piRNA	0	1
21ur-10329	piRNA	0	1
21ur-1033	piRNA	0	1
21ur-10331	piRNA	0	1
21ur-10332	piRNA	-0.707339	0.955363
21ur-10333	piRNA	0	1
21ur-10334	piRNA	0	1
21ur-10335	piRNA	0	1
21ur-10336	piRNA	0	1
21ur-10337	piRNA	0	1
21ur-10338	piRNA	0	1
21ur-10339	piRNA	-0.7922	0.843839
21ur-1034	piRNA	0	1
21ur-10340	piRNA	0	1
21ur-10341	piRNA	0	1
21ur-10342	piRNA	0	1
21ur-10343	piRNA	0	1
21ur-10344	piRNA	0	1
21ur-10345	piRNA	0	1
21ur-10346	piRNA	0	1
21ur-10347	piRNA	0	1
21ur-10348	piRNA	0	1
21ur-10349	piRNA	-2.82678	0.854256
21ur-1035	piRNA	0	1
21ur-10350	piRNA	0	1
21ur-10351	piRNA	1.20994	0.879022
21ur-10352	piRNA	0	1
21ur-10353	piRNA	0	1
21ur-10354	piRNA	0	1
21ur-10355	piRNA	0	1
21ur-10356	piRNA	0	1
21ur-10357	piRNA	0.823719	0.840732
21ur-10358	piRNA	0	1
21ur-10359	piRNA	0	1
21ur-1036	piRNA	-0.495465	0.811864
21ur-10360	piRNA	0.463435	0.796171
21ur-10361	piRNA	0	1
21ur-10362	piRNA	0	1
21ur-10363	piRNA	0	1
21ur-10364	piRNA	0	1
21ur-10365	piRNA	0	1
21ur-10366	piRNA	0	1
21ur-10367	piRNA	0	1
21ur-10368	piRNA	0	1
21ur-10369	piRNA	0	1
21ur-1037	piRNA	0	1
21ur-10370	piRNA	0	1
21ur-10371	piRNA	1.88791	0.931701
21ur-10372	piRNA	-0.785697	0.973347
21ur-10373	piRNA	0	1
21ur-10374	piRNA	0	1
21ur-10375	piRNA	0	1
21ur-10376	piRNA	0	1
21ur-10377	piRNA	0	1
21ur-10378	piRNA	0	1
21ur-10379	piRNA	1.88791	0.838919
21ur-1038	piRNA	0	1
21ur-10380	piRNA	0	1
21ur-10381	piRNA	0	1
21ur-10382	piRNA	0	1
21ur-10383	piRNA	-2.16983	0.972827
21ur-10384	piRNA	0	1
21ur-10385	piRNA	0	1
21ur-10386	piRNA	0	1
21ur-10387	piRNA	0	1
21ur-10388	piRNA	0	1
21ur-10389	piRNA	0	1
21ur-1039	piRNA	0	1
21ur-10390	piRNA	0	1
21ur-10391	piRNA	0	1
21ur-10392	piRNA	0	1
21ur-10393	piRNA	0	1
21ur-10394	piRNA	0	1
21ur-10395	piRNA	0	1
21ur-10396	piRNA	0	1
21ur-10397	piRNA	0	1
21ur-10398	piRNA	0.719351	0.792373
21ur-10399	piRNA	0	1
21ur-104	piRNA	0.170036	0.894531
21ur-1040	piRNA	0	1
21ur-10400	piRNA	0	1
21ur-10401	piRNA	0	1
21ur-10402	piRNA	0	1
21ur-10403	piRNA	0	1
21ur-10404	piRNA	0	1
21ur-10406	piRNA	0	1
21ur-10407	piRNA	0	1
21ur-10408	piRNA	0	1
21ur-10409	piRNA	-1.60987	0.921904
21ur-1041	piRNA	0	1
21ur-10410	piRNA	0	1
21ur-10411	piRNA	0	1
21ur-10412	piRNA	0	1
21ur-10413	piRNA	0	1
21ur-10414	piRNA	0	1
21ur-10415	piRNA	0	1
21ur-10416	piRNA	0	1
21ur-10417	piRNA	0	1
21ur-10418	piRNA	0	1
21ur-10419	piRNA	0	1
21ur-1042	piRNA	0	1
21ur-10420	piRNA	0	1
21ur-10421	piRNA	0	1
21ur-10422	piRNA	0	1
21ur-10423	piRNA	0	1
21ur-10424	piRNA	0	1
21ur-10425	piRNA	0	1
21ur-10426	piRNA	0	1
21ur-10427	piRNA	0	1
21ur-10428	piRNA	1.24176	0.814597
21ur-10429	piRNA	0	1
21ur-1043	piRNA	0	1
21ur-10430	piRNA	0	1
21ur-10431	piRNA	0	1
21ur-10432	piRNA	0	1
21ur-10433	piRNA	0	1
21ur-10434	piRNA	0	1
21ur-10435	piRNA	0	1
21ur-10436	piRNA	0	1
21ur-10437	piRNA	0	1
21ur-10438	piRNA	0	1
21ur-10439	piRNA	0	1
21ur-1044	piRNA	0	1
21ur-10440	piRNA	0	1
21ur-10441	piRNA	0	1
21ur-10442	piRNA	0	1
21ur-10443	piRNA	0	1
21ur-10444	piRNA	0	1
21ur-10445	piRNA	0	1
21ur-10446	piRNA	2.22452	0.981207
21ur-10447	piRNA	0	1
21ur-10449	piRNA	2.84745	0.95055
21ur-1045	piRNA	0	1
21ur-10450	piRNA	0	1
21ur-10451	piRNA	0	1
21ur-10452	piRNA	0	1
21ur-10453	piRNA	0	1
21ur-10454	piRNA	0	1
21ur-10455	piRNA	0	1
21ur-10456	piRNA	0	1
21ur-10457	piRNA	0	1
21ur-10458	piRNA	0	1
21ur-10459	piRNA	0	1
21ur-1046	piRNA	0	1
21ur-10460	piRNA	-2.69532	0.81723
21ur-10461	piRNA	0	1
21ur-10462	piRNA	0.693968	0.882176
21ur-10463	piRNA	0	1
21ur-10464	piRNA	0	1
21ur-10465	piRNA	0	1
21ur-10466	piRNA	0	1
21ur-10467	piRNA	0	1
21ur-10468	piRNA	0	1
21ur-10469	piRNA	0	1
21ur-1047	piRNA	0	1
21ur-10470	piRNA	0	1
21ur-10471	piRNA	0	1
21ur-10472	piRNA	0	1
21ur-10473	piRNA	0	1
21ur-10474	piRNA	0	1
21ur-10475	piRNA	-0.64025	0.827732
21ur-10476	piRNA	-0.212449	0.793413
21ur-10477	piRNA	0	1
21ur-10478	piRNA	0	1
21ur-10479	piRNA	0	1
21ur-1048	piRNA	0	1
21ur-10480	piRNA	-1.88555	0.883417
21ur-10481	piRNA	-1.99758	0.88802
21ur-10482	piRNA	0	1
21ur-10483	piRNA	0	1
21ur-10484	piRNA	0	1
21ur-10485	piRNA	0	1
21ur-10486	piRNA	0	1
21ur-10487	piRNA	0	1
21ur-10488	piRNA	0	1
21ur-10489	piRNA	0	1
21ur-1049	piRNA	0	1
21ur-10490	piRNA	0	1
21ur-10491	piRNA	0	1
21ur-10492	piRNA	0.0892482	0.912092
21ur-10493	piRNA	0	1
21ur-10494	piRNA	0	1
21ur-10495	piRNA	0	1
21ur-10496	piRNA	0	1
21ur-10497	piRNA	0	1
21ur-10498	piRNA	0	1
21ur-10499	piRNA	0	1
21ur-105	piRNA	0	1
21ur-1050	piRNA	0.0350179	0.82175
21ur-10500	piRNA	-3.17636	0.848044
21ur-10502	piRNA	-3.58307	0.864869
21ur-10503	piRNA	0	1
21ur-10504	piRNA	0	1
21ur-10505	piRNA	0	1
21ur-10506	piRNA	0	1
21ur-10507	piRNA	-1.03603	0.804216
21ur-10508	piRNA	0	1
21ur-10509	piRNA	0	1
21ur-1051	piRNA	0.251046	0.938568
21ur-10510	piRNA	0	1
21ur-10511	piRNA	-2.40474	0.823719
21ur-10512	piRNA	0	1
21ur-10513	piRNA	0	1
21ur-10514	piRNA	0	1
21ur-10515	piRNA	0	1
21ur-10516	piRNA	0	1
21ur-10517	piRNA	0	1
21ur-10518	piRNA	-3.22685	0.976809
21ur-10519	piRNA	0	1
21ur-1052	piRNA	1.26942	0.904803
21ur-10520	piRNA	0	1
21ur-10521	piRNA	-1.42135	0.986672
21ur-10522	piRNA	0	1
21ur-10523	piRNA	0	1
21ur-10524	piRNA	0	1
21ur-10525	piRNA	0	1
21ur-10526	piRNA	0	1
21ur-10527	piRNA	0	1
21ur-10528	piRNA	0	1
21ur-10529	piRNA	0	1
21ur-1053	piRNA	-0.369584	0.948549
21ur-10530	piRNA	0	1
21ur-10531	piRNA	0	1
21ur-10532	piRNA	0	1
21ur-10533	piRNA	0	1
21ur-10534	piRNA	0	1
21ur-10535	piRNA	0	1
21ur-10537	piRNA	0.53738	0.882261
21ur-10538	piRNA	0	1
21ur-10539	piRNA	0	1
21ur-1054	piRNA	0	1
21ur-10540	piRNA	0	1
21ur-10541	piRNA	0	1
21ur-10542	piRNA	0	1
21ur-10543	piRNA	0	1
21ur-10544	piRNA	0	1
21ur-10545	piRNA	0	1
21ur-10546	piRNA	0	1
21ur-10547	piRNA	0	1
21ur-10548	piRNA	0	1
21ur-10549	piRNA	0	1
21ur-1055	piRNA	0.535632	0.95975
21ur-10550	piRNA	-1.42442	0.987619
21ur-10551	piRNA	0	1
21ur-10552	piRNA	0	1
21ur-10553	piRNA	0	1
21ur-10554	piRNA	0	1
21ur-10555	piRNA	0	1
21ur-10556	piRNA	0	1
21ur-10557	piRNA	0	1
21ur-10558	piRNA	0	1
21ur-10559	piRNA	0	1
21ur-1056	piRNA	2.62055	0.833198
21ur-10560	piRNA	0	1
21ur-10561	piRNA	0	1
21ur-10562	piRNA	0	1
21ur-10563	piRNA	0	1
21ur-10564	piRNA	0	1
21ur-10565	piRNA	0	1
21ur-10566	piRNA	0	1
21ur-10567	piRNA	0	1
21ur-10568	piRNA	0	1
21ur-10569	piRNA	0	1
21ur-1057	piRNA	-0.0332501	0.949869
21ur-10570	piRNA	0	1
21ur-10571	piRNA	0	1
21ur-10572	piRNA	0	1
21ur-10573	piRNA	0	1
21ur-10574	piRNA	0	1
21ur-10575	piRNA	0	1
21ur-10576	piRNA	0	1
21ur-10577	piRNA	0	1
21ur-10579	piRNA	0	1
21ur-1058	piRNA	0	1
21ur-10580	piRNA	0	1
21ur-10581	piRNA	0	1
21ur-10582	piRNA	0	1
21ur-10583	piRNA	0	1
21ur-10584	piRNA	0	1
21ur-10585	piRNA	0	1
21ur-10587	piRNA	0	1
21ur-10588	piRNA	-2.40181	0.870516
21ur-10589	piRNA	0	1
21ur-1059	piRNA	0.685686	0.819856
21ur-10590	piRNA	0	1
21ur-10591	piRNA	0	1
21ur-10592	piRNA	0	1
21ur-10593	piRNA	0	1
21ur-10594	piRNA	-1.88555	0.984265
21ur-10595	piRNA	-0.851285	0.825556
21ur-10596	piRNA	0	1
21ur-10597	piRNA	0	1
21ur-10598	piRNA	0	1
21ur-10599	piRNA	0	1
21ur-106	piRNA	0	1
21ur-1060	piRNA	-2.87105	0.858378
21ur-10600	piRNA	0	1
21ur-10601	piRNA	0	1
21ur-10602	piRNA	0	1
21ur-10604	piRNA	0	1
21ur-10605	piRNA	0	1
21ur-10606	piRNA	0	1
21ur-10607	piRNA	0	1
21ur-10608	piRNA	0	1
21ur-10609	piRNA	0	1
21ur-1061	piRNA	0	1
21ur-10610	piRNA	0	1
21ur-10611	piRNA	0	1
21ur-10612	piRNA	0	1
21ur-10613	piRNA	0	1
21ur-10614	piRNA	0	1
21ur-10615	piRNA	0	1
21ur-10616	piRNA	0	1
21ur-10617	piRNA	0	1
21ur-10618	piRNA	0	1
21ur-10619	piRNA	0	1
21ur-1062	piRNA	0	1
21ur-10620	piRNA	0	1
21ur-10621	piRNA	0	1
21ur-10622	piRNA	0	1
21ur-10623	piRNA	0	1
21ur-10624	piRNA	0	1
21ur-10625	piRNA	0	1
21ur-10626	piRNA	0	1
21ur-10627	piRNA	0	1
21ur-10628	piRNA	0	1
21ur-10629	piRNA	0	1
21ur-1063	piRNA	-0.78369	0.952322
21ur-10630	piRNA	0	1
21ur-10631	piRNA	0	1
21ur-10632	piRNA	0	1
21ur-10633	piRNA	0	1
21ur-10634	piRNA	0	1
21ur-10635	piRNA	0	1
21ur-10636	piRNA	0	1
21ur-10637	piRNA	0	1
21ur-10638	piRNA	0	1
21ur-10639	piRNA	0	1
21ur-1064	piRNA	0	1
21ur-10640	piRNA	0	1
21ur-10641	piRNA	0	1
21ur-10642	piRNA	0	1
21ur-10643	piRNA	0	1
21ur-10644	piRNA	0	1
21ur-10645	piRNA	0	1
21ur-10646	piRNA	0	1
21ur-10647	piRNA	0	1
21ur-10648	piRNA	0	1
21ur-10649	piRNA	0	1
21ur-1065	piRNA	-0.375876	0.965674
21ur-10650	piRNA	0	1
21ur-10651	piRNA	0	1
21ur-10652	piRNA	0	1
21ur-10653	piRNA	0	1
21ur-10654	piRNA	0	1
21ur-10655	piRNA	0	1
21ur-10656	piRNA	0	1
21ur-10657	piRNA	0	1
21ur-10658	piRNA	0	1
21ur-10659	piRNA	0	1
21ur-1066	piRNA	-2.14153	0.86324
21ur-10660	piRNA	-3.54422	0.798216
21ur-10661	piRNA	0	1
21ur-10662	piRNA	0	1
21ur-10663	piRNA	0	1
21ur-10664	piRNA	0	1
21ur-10665	piRNA	0	1
21ur-10666	piRNA	0	1
21ur-10667	piRNA	0	1
21ur-10668	piRNA	0	1
21ur-10669	piRNA	0	1
21ur-1067	piRNA	1.09755	0.927805
21ur-10670	piRNA	0	1
21ur-10671	piRNA	0	1
21ur-10672	piRNA	0	1
21ur-10673	piRNA	0	1
21ur-10674	piRNA	0	1
21ur-10675	piRNA	0	1
21ur-10676	piRNA	0	1
21ur-10677	piRNA	0	1
21ur-10678	piRNA	0	1
21ur-10679	piRNA	0	1
21ur-1068	piRNA	0	1
21ur-10680	piRNA	0	1
21ur-10681	piRNA	0	1
21ur-10682	piRNA	0	1
21ur-10683	piRNA	0	1
21ur-10684	piRNA	0	1
21ur-10685	piRNA	0	1
21ur-10686	piRNA	-0.933865	0.830414
21ur-10687	piRNA	-0.450253	0.948895
21ur-10688	piRNA	2.18671	0.877035
21ur-10689	piRNA	0	1
21ur-1069	piRNA	-0.691807	0.823604
21ur-10690	piRNA	0	1
21ur-10691	piRNA	-1.78012	0.858437
21ur-10692	piRNA	0	1
21ur-10693	piRNA	0	1
21ur-10694	piRNA	2.14733	0.810053
21ur-10695	piRNA	0	1
21ur-10696	piRNA	0	1
21ur-10697	piRNA	0	1
21ur-10698	piRNA	0	1
21ur-10699	piRNA	0	1
21ur-107	piRNA	-2.23437	0.946325
21ur-1070	piRNA	0	1
21ur-10700	piRNA	-1.09665	0.836309
21ur-10701	piRNA	0	1
21ur-10702	piRNA	0	1
21ur-10703	piRNA	0	1
21ur-10704	piRNA	0	1
21ur-10705	piRNA	0	1
21ur-10706	piRNA	0	1
21ur-10708	piRNA	0	1
21ur-10709	piRNA	0	1
21ur-1071	piRNA	-1.84995	0.848955
21ur-10710	piRNA	0	1
21ur-10711	piRNA	0	1
21ur-10712	piRNA	0	1
21ur-10713	piRNA	0	1
21ur-10714	piRNA	0	1
21ur-10715	piRNA	0	1
21ur-10716	piRNA	0	1
21ur-10717	piRNA	0	1
21ur-10718	piRNA	0	1
21ur-10719	piRNA	0	1
21ur-1072	piRNA	1.34383	0.961853
21ur-10720	piRNA	0	1
21ur-10721	piRNA	0	1
21ur-10722	piRNA	0	1
21ur-10723	piRNA	0	1
21ur-10724	piRNA	0	1
21ur-10725	piRNA	0	1
21ur-10726	piRNA	0	1
21ur-10727	piRNA	0	1
21ur-10728	piRNA	0	1
21ur-10729	piRNA	0	1
21ur-1073	piRNA	-0.13034	0.838927
21ur-10730	piRNA	0	1
21ur-10731	piRNA	0	1
21ur-10732	piRNA	0	1
21ur-10733	piRNA	0	1
21ur-10734	piRNA	0	1
21ur-10735	piRNA	0	1
21ur-10736	piRNA	0	1
21ur-10737	piRNA	0	1
21ur-10738	piRNA	0	1
21ur-10739	piRNA	0	1
21ur-1074	piRNA	0	1
21ur-10740	piRNA	-3.65228	0.920121
21ur-10741	piRNA	0	1
21ur-10742	piRNA	0	1
21ur-10743	piRNA	1.27123	0.95955
21ur-10744	piRNA	0	1
21ur-10745	piRNA	0	1
21ur-10746	piRNA	0	1
21ur-10747	piRNA	0	1
21ur-10748	piRNA	0	1
21ur-10749	piRNA	0	1
21ur-1075	piRNA	-1.25005	0.911878
21ur-10750	piRNA	0	1
21ur-10751	piRNA	0	1
21ur-10752	piRNA	0	1
21ur-10753	piRNA	0	1
21ur-10754	piRNA	0	1
21ur-10755	piRNA	0	1
21ur-10756	piRNA	0	1
21ur-10757	piRNA	0	1
21ur-10758	piRNA	0	1
21ur-10759	piRNA	0	1
21ur-1076	piRNA	0	1
21ur-10760	piRNA	0	1
21ur-10761	piRNA	0	1
21ur-10762	piRNA	0	1
21ur-10763	piRNA	0	1
21ur-10764	piRNA	0	1
21ur-10765	piRNA	0	1
21ur-10766	piRNA	0	1
21ur-10767	piRNA	0	1
21ur-10768	piRNA	0	1
21ur-10769	piRNA	0	1
21ur-1077	piRNA	2.56437	0.896877
21ur-10770	piRNA	0	1
21ur-10771	piRNA	-0.611784	0.802176
21ur-10772	piRNA	1.64182	0.797649
21ur-10773	piRNA	0	1
21ur-10774	piRNA	0	1
21ur-10775	piRNA	0	1
21ur-10776	piRNA	0	1
21ur-10777	piRNA	0	1
21ur-10778	piRNA	0	1
21ur-10779	piRNA	0	1
21ur-1078	piRNA	-0.205748	0.82915
21ur-10780	piRNA	0	1
21ur-10781	piRNA	0	1
21ur-10782	piRNA	0	1
21ur-10783	piRNA	-3.20913	0.902937
21ur-10784	piRNA	0	1
21ur-10785	piRNA	0	1
21ur-10786	piRNA	0	1
21ur-10787	piRNA	4.05002	0.898793
21ur-10788	piRNA	0	1
21ur-10789	piRNA	0	1
21ur-1079	piRNA	-0.482166	0.896528
21ur-10790	piRNA	-3.49047	0.798148
21ur-10791	piRNA	0	1
21ur-10792	piRNA	0	1
21ur-10793	piRNA	0	1
21ur-10794	piRNA	0	1
21ur-10795	piRNA	0	1
21ur-10796	piRNA	0	1
21ur-10797	piRNA	0	1
21ur-10798	piRNA	0	1
21ur-10799	piRNA	0	1
21ur-108	piRNA	1.12566	0.840013
21ur-1080	piRNA	0	1
21ur-10800	piRNA	0	1
21ur-10801	piRNA	0	1
21ur-10802	piRNA	0	1
21ur-10803	piRNA	0	1
21ur-10804	piRNA	0	1
21ur-10805	piRNA	0	1
21ur-10806	piRNA	0	1
21ur-10807	piRNA	0	1
21ur-10808	piRNA	0	1
21ur-10809	piRNA	0	1
21ur-1081	piRNA	0	1
21ur-10810	piRNA	0	1
21ur-10811	piRNA	0	1
21ur-10812	piRNA	0	1
21ur-10813	piRNA	0	1
21ur-10814	piRNA	0	1
21ur-10815	piRNA	0	1
21ur-10816	piRNA	0	1
21ur-10817	piRNA	0	1
21ur-10818	piRNA	0	1
21ur-10819	piRNA	0	1
21ur-1082	piRNA	-0.674023	0.898922
21ur-10820	piRNA	0	1
21ur-10821	piRNA	0	1
21ur-10822	piRNA	0	1
21ur-10823	piRNA	0	1
21ur-10824	piRNA	0	1
21ur-10825	piRNA	0	1
21ur-10826	piRNA	0	1
21ur-10827	piRNA	0	1
21ur-10828	piRNA	0	1
21ur-10829	piRNA	0	1
21ur-1083	piRNA	0.769733	0.833525
21ur-10831	piRNA	0	1
21ur-10832	piRNA	0	1
21ur-10833	piRNA	0	1
21ur-10834	piRNA	0	1
21ur-10835	piRNA	0	1
21ur-10836	piRNA	0	1
21ur-10837	piRNA	0	1
21ur-10838	piRNA	0	1
21ur-10839	piRNA	0	1
21ur-1084	piRNA	0	1
21ur-10840	piRNA	0	1
21ur-10841	piRNA	0	1
21ur-10842	piRNA	0	1
21ur-10843	piRNA	0	1
21ur-10844	piRNA	0	1
21ur-10845	piRNA	0	1
21ur-10846	piRNA	0	1
21ur-10847	piRNA	0	1
21ur-10848	piRNA	0	1
21ur-1085	piRNA	0	1
21ur-10850	piRNA	0	1
21ur-10851	piRNA	0	1
21ur-10852	piRNA	0	1
21ur-10853	piRNA	0	1
21ur-10854	piRNA	0	1
21ur-10855	piRNA	0	1
21ur-10856	piRNA	0	1
21ur-10857	piRNA	0	1
21ur-10858	piRNA	-1.12542	0.980242
21ur-10859	piRNA	0	1
21ur-1086	piRNA	0	1
21ur-10860	piRNA	0	1
21ur-10861	piRNA	0	1
21ur-10862	piRNA	0	1
21ur-10863	piRNA	0	1
21ur-10864	piRNA	0	1
21ur-10865	piRNA	0	1
21ur-10866	piRNA	0	1
21ur-10867	piRNA	0	1
21ur-10868	piRNA	0	1
21ur-10869	piRNA	0	1
21ur-1087	piRNA	-0.345126	0.863787
21ur-10870	piRNA	0	1
21ur-10871	piRNA	0	1
21ur-10873	piRNA	0	1
21ur-10875	piRNA	0	1
21ur-10876	piRNA	0	1
21ur-10877	piRNA	0	1
21ur-10878	piRNA	0	1
21ur-10879	piRNA	0	1
21ur-1088	piRNA	0.063921	0.918697
21ur-10880	piRNA	0	1
21ur-10881	piRNA	0	1
21ur-10882	piRNA	0	1
21ur-10883	piRNA	0	1
21ur-10884	piRNA	0	1
21ur-10885	piRNA	0	1
21ur-10886	piRNA	0	1
21ur-10887	piRNA	0	1
21ur-10888	piRNA	0	1
21ur-10889	piRNA	0	1
21ur-1089	piRNA	-1.21094	0.874583
21ur-10890	piRNA	0	1
21ur-10891	piRNA	0	1
21ur-10892	piRNA	1.29668	0.9206
21ur-10893	piRNA	0	1
21ur-10894	piRNA	0	1
21ur-10895	piRNA	0	1
21ur-10896	piRNA	0	1
21ur-10897	piRNA	0	1
21ur-10898	piRNA	0.719351	0.97285
21ur-10899	piRNA	0	1
21ur-109	piRNA	0	1
21ur-1090	piRNA	1.73835	0.923403
21ur-10900	piRNA	0	1
21ur-10901	piRNA	1.85487	0.876795
21ur-10902	piRNA	0	1
21ur-10903	piRNA	0	1
21ur-10904	piRNA	0	1
21ur-10905	piRNA	0	1
21ur-10906	piRNA	0	1
21ur-10907	piRNA	0	1
21ur-10908	piRNA	0	1
21ur-10909	piRNA	0	1
21ur-1091	piRNA	0.033497	0.838009
21ur-10910	piRNA	0	1
21ur-10911	piRNA	0	1
21ur-10912	piRNA	0	1
21ur-10913	piRNA	0	1
21ur-10914	piRNA	0	1
21ur-10915	piRNA	0	1
21ur-10916	piRNA	0	1
21ur-10917	piRNA	0	1
21ur-10918	piRNA	0	1
21ur-10919	piRNA	0	1
21ur-1092	piRNA	0	1
21ur-10920	piRNA	0	1
21ur-10921	piRNA	0	1
21ur-10922	piRNA	0	1
21ur-10923	piRNA	0	1
21ur-10924	piRNA	0	1
21ur-10926	piRNA	0	1
21ur-10927	piRNA	0	1
21ur-10928	piRNA	0	1
21ur-10929	piRNA	0	1
21ur-1093	piRNA	0.00563094	0.884713
21ur-10930	piRNA	0	1
21ur-10931	piRNA	0	1
21ur-10932	piRNA	0	1
21ur-10933	piRNA	0	1
21ur-10934	piRNA	0	1
21ur-10935	piRNA	0	1
21ur-10936	piRNA	0	1
21ur-10937	piRNA	0	1
21ur-10938	piRNA	0	1
21ur-10939	piRNA	0	1
21ur-1094	piRNA	0	1
21ur-10940	piRNA	0	1
21ur-10941	piRNA	0	1
21ur-10942	piRNA	0	1
21ur-10944	piRNA	-1.51266	0.873661
21ur-10945	piRNA	0	1
21ur-10946	piRNA	0	1
21ur-10947	piRNA	0	1
21ur-10948	piRNA	0	1
21ur-10949	piRNA	0	1
21ur-1095	piRNA	0	1
21ur-10950	piRNA	0	1
21ur-10951	piRNA	0	1
21ur-10952	piRNA	0	1
21ur-10953	piRNA	0	1
21ur-10954	piRNA	0	1
21ur-10955	piRNA	0	1
21ur-10956	piRNA	0	1
21ur-10957	piRNA	0	1
21ur-10958	piRNA	0	1
21ur-10959	piRNA	0	1
21ur-1096	piRNA	0	1
21ur-10960	piRNA	0	1
21ur-10961	piRNA	0	1
21ur-10962	piRNA	0	1
21ur-10963	piRNA	0	1
21ur-10964	piRNA	0	1
21ur-10965	piRNA	-3.68734	0.89136
21ur-10966	piRNA	0	1
21ur-10967	piRNA	0	1
21ur-10968	piRNA	0	1
21ur-10969	piRNA	0	1
21ur-1097	piRNA	-0.303992	0.986901
21ur-10970	piRNA	0	1
21ur-10971	piRNA	0	1
21ur-10972	piRNA	0	1
21ur-10973	piRNA	0	1
21ur-10974	piRNA	0	1
21ur-10975	piRNA	0	1
21ur-10976	piRNA	0	1
21ur-10977	piRNA	0	1
21ur-10978	piRNA	0	1
21ur-10979	piRNA	0	1
21ur-1098	piRNA	0	1
21ur-10980	piRNA	0	1
21ur-10981	piRNA	0	1
21ur-10982	piRNA	0	1
21ur-10983	piRNA	-0.337108	0.900342
21ur-10984	piRNA	0	1
21ur-10985	piRNA	0.719351	0.908259
21ur-10986	piRNA	0	1
21ur-10988	piRNA	0	1
21ur-10989	piRNA	0	1
21ur-1099	piRNA	0	1
21ur-10990	piRNA	0	1
21ur-10992	piRNA	0	1
21ur-10993	piRNA	0	1
21ur-10994	piRNA	0	1
21ur-10995	piRNA	0	1
21ur-10996	piRNA	0	1
21ur-10997	piRNA	0	1
21ur-10998	piRNA	0	1
21ur-10999	piRNA	0	1
21ur-11	piRNA	0	1
21ur-110	piRNA	0	1
21ur-1100	piRNA	0	1
21ur-11000	piRNA	0	1
21ur-11001	piRNA	0	1
21ur-11002	piRNA	1.61494	0.894026
21ur-11003	piRNA	0	1
21ur-11004	piRNA	0	1
21ur-11005	piRNA	0	1
21ur-11006	piRNA	0	1
21ur-11007	piRNA	0	1
21ur-11008	piRNA	0	1
21ur-11009	piRNA	0	1
21ur-1101	piRNA	0	1
21ur-11010	piRNA	0	1
21ur-11011	piRNA	0	1
21ur-11012	piRNA	0	1
21ur-11013	piRNA	0	1
21ur-11014	piRNA	-0.652249	0.915252
21ur-11015	piRNA	0	1
21ur-11016	piRNA	0	1
21ur-11017	piRNA	0	1
21ur-11018	piRNA	0	1
21ur-11019	piRNA	0	1
21ur-1102	piRNA	0	1
21ur-11020	piRNA	0	1
21ur-11021	piRNA	0	1
21ur-11022	piRNA	0	1
21ur-11023	piRNA	0	1
21ur-11024	piRNA	0	1
21ur-11025	piRNA	0	1
21ur-11026	piRNA	-2.334	0.870193
21ur-11027	piRNA	0	1
21ur-11028	piRNA	0	1
21ur-11029	piRNA	0	1
21ur-1103	piRNA	0	1
21ur-11030	piRNA	0	1
21ur-11031	piRNA	0	1
21ur-11032	piRNA	0	1
21ur-11033	piRNA	0	1
21ur-11034	piRNA	0	1
21ur-11035	piRNA	0	1
21ur-11036	piRNA	0	1
21ur-11037	piRNA	0	1
21ur-11038	piRNA	0	1
21ur-11039	piRNA	0	1
21ur-1104	piRNA	0	1
21ur-11040	piRNA	0	1
21ur-11041	piRNA	0	1
21ur-11042	piRNA	0	1
21ur-11043	piRNA	0	1
21ur-11044	piRNA	0	1
21ur-11045	piRNA	-0.0342382	0.880116
21ur-11046	piRNA	0	1
21ur-11047	piRNA	0	1
21ur-11049	piRNA	0	1
21ur-1105	piRNA	0	1
21ur-11050	piRNA	0	1
21ur-11051	piRNA	0	1
21ur-11052	piRNA	0	1
21ur-11054	piRNA	0	1
21ur-11056	piRNA	0	1
21ur-11057	piRNA	0	1
21ur-11058	piRNA	0	1
21ur-11059	piRNA	0	1
21ur-1106	piRNA	0	1
21ur-11060	piRNA	0	1
21ur-11061	piRNA	0	1
21ur-11062	piRNA	0	1
21ur-11063	piRNA	0	1
21ur-11064	piRNA	0	1
21ur-11065	piRNA	0	1
21ur-11066	piRNA	0	1
21ur-11067	piRNA	-2.16641	0.968592
21ur-11068	piRNA	0	1
21ur-11069	piRNA	0	1
21ur-1107	piRNA	0	1
21ur-11070	piRNA	0	1
21ur-11071	piRNA	0	1
21ur-11072	piRNA	0	1
21ur-11073	piRNA	0	1
21ur-11074	piRNA	0	1
21ur-11075	piRNA	0	1
21ur-11076	piRNA	-3.15851	0.983503
21ur-11077	piRNA	0	1
21ur-11078	piRNA	0	1
21ur-11079	piRNA	0	1
21ur-1108	piRNA	0	1
21ur-11080	piRNA	0	1
21ur-11081	piRNA	0	1
21ur-11082	piRNA	0	1
21ur-11083	piRNA	0	1
21ur-11084	piRNA	0	1
21ur-11085	piRNA	0	1
21ur-11086	piRNA	0	1
21ur-11087	piRNA	0	1
21ur-11088	piRNA	-1.92993	0.794888
21ur-11089	piRNA	0	1
21ur-1109	piRNA	-0.46398	0.896687
21ur-11090	piRNA	-1.45346	0.949361
21ur-11091	piRNA	0	1
21ur-11092	piRNA	0	1
21ur-11093	piRNA	0	1
21ur-11094	piRNA	0	1
21ur-11095	piRNA	0	1
21ur-11096	piRNA	0	1
21ur-11097	piRNA	0	1
21ur-11098	piRNA	0	1
21ur-11099	piRNA	-2.82678	0.971444
21ur-111	piRNA	0	1
21ur-1110	piRNA	0	1
21ur-11100	piRNA	0	1
21ur-11101	piRNA	0	1
21ur-11102	piRNA	0	1
21ur-11104	piRNA	0	1
21ur-11105	piRNA	0.916425	0.823121
21ur-11106	piRNA	0	1
21ur-11107	piRNA	0	1
21ur-11108	piRNA	0	1
21ur-11109	piRNA	0	1
21ur-11110	piRNA	0	1
21ur-11111	piRNA	0	1
21ur-11112	piRNA	0	1
21ur-11113	piRNA	0	1
21ur-11115	piRNA	-2.69532	0.969073
21ur-11116	piRNA	0	1
21ur-11117	piRNA	0	1
21ur-11118	piRNA	0	1
21ur-11119	piRNA	0	1
21ur-1112	piRNA	0	1
21ur-11120	piRNA	0	1
21ur-11121	piRNA	0	1
21ur-11122	piRNA	0	1
21ur-11123	piRNA	0	1
21ur-11124	piRNA	0	1
21ur-11125	piRNA	0	1
21ur-11126	piRNA	0	1
21ur-11127	piRNA	0	1
21ur-11128	piRNA	0	1
21ur-11129	piRNA	0	1
21ur-1113	piRNA	0	1
21ur-11130	piRNA	0	1
21ur-11131	piRNA	0	1
21ur-11132	piRNA	0	1
21ur-11133	piRNA	0	1
21ur-11135	piRNA	0	1
21ur-11136	piRNA	0	1
21ur-11137	piRNA	0	1
21ur-11138	piRNA	0	1
21ur-11139	piRNA	0	1
21ur-1114	piRNA	-0.14786	0.984818
21ur-11140	piRNA	0	1
21ur-11141	piRNA	0	1
21ur-11142	piRNA	0	1
21ur-11143	piRNA	0	1
21ur-11144	piRNA	0	1
21ur-11145	piRNA	0	1
21ur-11146	piRNA	0	1
21ur-11147	piRNA	0	1
21ur-11148	piRNA	0	1
21ur-11149	piRNA	0	1
21ur-1115	piRNA	0.31391	0.967333
21ur-11150	piRNA	0	1
21ur-11151	piRNA	0	1
21ur-11152	piRNA	0	1
21ur-11153	piRNA	0	1
21ur-11154	piRNA	0	1
21ur-11155	piRNA	0	1
21ur-11156	piRNA	0	1
21ur-11157	piRNA	0	1
21ur-11158	piRNA	0	1
21ur-11159	piRNA	0	1
21ur-1116	piRNA	0	1
21ur-11160	piRNA	0	1
21ur-11161	piRNA	0	1
21ur-11162	piRNA	0	1
21ur-11164	piRNA	0	1
21ur-11165	piRNA	0	1
21ur-11166	piRNA	0	1
21ur-11167	piRNA	0	1
21ur-11168	piRNA	0	1
21ur-11169	piRNA	0	1
21ur-1117	piRNA	0	1
21ur-11171	piRNA	0	1
21ur-11172	piRNA	0	1
21ur-11173	piRNA	0	1
21ur-11174	piRNA	0	1
21ur-11175	piRNA	0	1
21ur-11176	piRNA	0	1
21ur-11177	piRNA	-1.83604	0.930938
21ur-11178	piRNA	0	1
21ur-11179	piRNA	0	1
21ur-1118	piRNA	0	1
21ur-11180	piRNA	0	1
21ur-11181	piRNA	0	1
21ur-11182	piRNA	0	1
21ur-11183	piRNA	0	1
21ur-11184	piRNA	0	1
21ur-11185	piRNA	0	1
21ur-11186	piRNA	0	1
21ur-11187	piRNA	0	1
21ur-11188	piRNA	0	1
21ur-11189	piRNA	0	1
21ur-1119	piRNA	0	1
21ur-11190	piRNA	0	1
21ur-11191	piRNA	0	1
21ur-11192	piRNA	0	1
21ur-11193	piRNA	0	1
21ur-11194	piRNA	0	1
21ur-11195	piRNA	0	1
21ur-11196	piRNA	0	1
21ur-11197	piRNA	0	1
21ur-11198	piRNA	0	1
21ur-11199	piRNA	0	1
21ur-112	piRNA	-1.1681	0.964594
21ur-1120	piRNA	0	1
21ur-11200	piRNA	0	1
21ur-11201	piRNA	-0.792705	0.925529
21ur-11202	piRNA	0	1
21ur-11203	piRNA	0	1
21ur-11204	piRNA	0	1
21ur-11205	piRNA	0	1
21ur-11206	piRNA	0	1
21ur-11207	piRNA	0	1
21ur-11208	piRNA	0	1
21ur-11209	piRNA	0	1
21ur-1121	piRNA	-0.287685	0.949442
21ur-11210	piRNA	0	1
21ur-11211	piRNA	0	1
21ur-11212	piRNA	0	1
21ur-11213	piRNA	0	1
21ur-11214	piRNA	0	1
21ur-11215	piRNA	0	1
21ur-11216	piRNA	0	1
21ur-11217	piRNA	0	1
21ur-11218	piRNA	0	1
21ur-11219	piRNA	0	1
21ur-1122	piRNA	-0.0555068	0.833984
21ur-11220	piRNA	0	1
21ur-11221	piRNA	0	1
21ur-11222	piRNA	0	1
21ur-11223	piRNA	0	1
21ur-11224	piRNA	0	1
21ur-11225	piRNA	0	1
21ur-11226	piRNA	0	1
21ur-11227	piRNA	0	1
21ur-11228	piRNA	0	1
21ur-11229	piRNA	0	1
21ur-1123	piRNA	0	1
21ur-11230	piRNA	0	1
21ur-11231	piRNA	0	1
21ur-11232	piRNA	0	1
21ur-11233	piRNA	0	1
21ur-11234	piRNA	0	1
21ur-11235	piRNA	0	1
21ur-11236	piRNA	0	1
21ur-11237	piRNA	-0.521358	0.792331
21ur-11238	piRNA	0	1
21ur-11239	piRNA	0	1
21ur-1124	piRNA	-0.448	0.86519
21ur-11240	piRNA	0	1
21ur-11241	piRNA	0	1
21ur-11242	piRNA	0	1
21ur-11243	piRNA	0	1
21ur-11244	piRNA	0	1
21ur-11245	piRNA	0	1
21ur-11246	piRNA	0	1
21ur-11247	piRNA	0	1
21ur-11248	piRNA	0	1
21ur-11249	piRNA	0	1
21ur-1125	piRNA	0	1
21ur-11250	piRNA	0	1
21ur-11251	piRNA	0	1
21ur-11252	piRNA	0	1
21ur-11253	piRNA	0	1
21ur-11254	piRNA	0	1
21ur-11255	piRNA	0	1
21ur-11256	piRNA	0	1
21ur-11257	piRNA	0	1
21ur-11258	piRNA	0	1
21ur-11259	piRNA	0	1
21ur-1126	piRNA	0.301513	0.860206
21ur-11260	piRNA	0	1
21ur-11261	piRNA	0	1
21ur-11262	piRNA	0	1
21ur-11263	piRNA	0	1
21ur-11264	piRNA	0	1
21ur-11265	piRNA	0	1
21ur-11266	piRNA	0	1
21ur-11267	piRNA	0	1
21ur-11268	piRNA	0	1
21ur-11269	piRNA	0	1
21ur-1127	piRNA	0	1
21ur-11270	piRNA	-2.93207	0.798051
21ur-11271	piRNA	0	1
21ur-11272	piRNA	0	1
21ur-11274	piRNA	0	1
21ur-11275	piRNA	0	1
21ur-11277	piRNA	0	1
21ur-11278	piRNA	0	1
21ur-11279	piRNA	0	1
21ur-1128	piRNA	0.217606	0.971275
21ur-11280	piRNA	0	1
21ur-11281	piRNA	0	1
21ur-11282	piRNA	0	1
21ur-11283	piRNA	0	1
21ur-11285	piRNA	0	1
21ur-11286	piRNA	0	1
21ur-11287	piRNA	0	1
21ur-11289	piRNA	0	1
21ur-1129	piRNA	0	1
21ur-11290	piRNA	0	1
21ur-11291	piRNA	0	1
21ur-11292	piRNA	0	1
21ur-11293	piRNA	0	1
21ur-11294	piRNA	0	1
21ur-11295	piRNA	0	1
21ur-11296	piRNA	0	1
21ur-11297	piRNA	0	1
21ur-11298	piRNA	0	1
21ur-11299	piRNA	0	1
21ur-113	piRNA	0	1
21ur-1130	piRNA	0.488521	0.824555
21ur-11300	piRNA	0	1
21ur-11301	piRNA	-0.0812396	0.856956
21ur-11302	piRNA	0	1
21ur-11303	piRNA	0	1
21ur-11304	piRNA	0	1
21ur-11305	piRNA	0	1
21ur-11306	piRNA	0	1
21ur-11308	piRNA	0	1
21ur-11309	piRNA	0	1
21ur-1131	piRNA	0	1
21ur-11310	piRNA	0	1
21ur-11311	piRNA	0	1
21ur-11312	piRNA	0	1
21ur-11313	piRNA	0	1
21ur-11314	piRNA	0	1
21ur-11315	piRNA	0	1
21ur-11316	piRNA	0	1
21ur-11317	piRNA	-1.074	0.904792
21ur-11318	piRNA	0	1
21ur-11319	piRNA	0	1
21ur-1132	piRNA	0	1
21ur-11320	piRNA	0	1
21ur-11321	piRNA	0	1
21ur-11322	piRNA	0	1
21ur-11323	piRNA	0	1
21ur-11324	piRNA	0	1
21ur-11325	piRNA	0	1
21ur-11326	piRNA	0	1
21ur-11327	piRNA	0	1
21ur-11328	piRNA	0	1
21ur-11329	piRNA	0	1
21ur-1133	piRNA	-1.78012	0.922654
21ur-11330	piRNA	0.907298	0.827755
21ur-11331	piRNA	0	1
21ur-11332	piRNA	0	1
21ur-11333	piRNA	0	1
21ur-11334	piRNA	0	1
21ur-11335	piRNA	0	1
21ur-11336	piRNA	0	1
21ur-11337	piRNA	0	1
21ur-11338	piRNA	0	1
21ur-11339	piRNA	0	1
21ur-1134	piRNA	0.819572	0.892518
21ur-11340	piRNA	0	1
21ur-11341	piRNA	0	1
21ur-11342	piRNA	0	1
21ur-11343	piRNA	0	1
21ur-11344	piRNA	0	1
21ur-11345	piRNA	0	1
21ur-11346	piRNA	0	1
21ur-11347	piRNA	0	1
21ur-11348	piRNA	0	1
21ur-11349	piRNA	0	1
21ur-1135	piRNA	-0.850222	0.948743
21ur-11350	piRNA	0	1
21ur-11351	piRNA	0	1
21ur-11352	piRNA	0	1
21ur-11353	piRNA	0	1
21ur-11354	piRNA	0	1
21ur-11355	piRNA	0	1
21ur-11357	piRNA	0	1
21ur-11358	piRNA	0	1
21ur-11359	piRNA	0	1
21ur-11360	piRNA	0	1
21ur-11361	piRNA	0	1
21ur-11362	piRNA	0	1
21ur-11363	piRNA	0	1
21ur-11364	piRNA	0	1
21ur-11365	piRNA	0	1
21ur-11366	piRNA	0	1
21ur-11367	piRNA	0	1
21ur-11368	piRNA	0	1
21ur-11369	piRNA	0	1
21ur-1137	piRNA	0	1
21ur-11370	piRNA	0	1
21ur-11371	piRNA	0	1
21ur-11373	piRNA	0	1
21ur-11374	piRNA	0	1
21ur-11375	piRNA	-2.63894	0.893266
21ur-11376	piRNA	0	1
21ur-11377	piRNA	0	1
21ur-11378	piRNA	0.371766	0.824603
21ur-11379	piRNA	0	1
21ur-1138	piRNA	0	1
21ur-11380	piRNA	0	1
21ur-11381	piRNA	0	1
21ur-11382	piRNA	0	1
21ur-11383	piRNA	0	1
21ur-11384	piRNA	0	1
21ur-11385	piRNA	0	1
21ur-11386	piRNA	0	1
21ur-11387	piRNA	0	1
21ur-11388	piRNA	0	1
21ur-11389	piRNA	0	1
21ur-1139	piRNA	0	1
21ur-11390	piRNA	0	1
21ur-11391	piRNA	0	1
21ur-11392	piRNA	0	1
21ur-11393	piRNA	0	1
21ur-11394	piRNA	0	1
21ur-11395	piRNA	0	1
21ur-11396	piRNA	0	1
21ur-11397	piRNA	0	1
21ur-11398	piRNA	0	1
21ur-11399	piRNA	0	1
21ur-114	piRNA	0	1
21ur-1140	piRNA	-3.05752	0.810706
21ur-11400	piRNA	0	1
21ur-11401	piRNA	0	1
21ur-11402	piRNA	0	1
21ur-11403	piRNA	0	1
21ur-11404	piRNA	0	1
21ur-11405	piRNA	0	1
21ur-11406	piRNA	0	1
21ur-11407	piRNA	0	1
21ur-11408	piRNA	0	1
21ur-11409	piRNA	0	1
21ur-1141	piRNA	0	1
21ur-11410	piRNA	0	1
21ur-11411	piRNA	0	1
21ur-11412	piRNA	0	1
21ur-11413	piRNA	0	1
21ur-11414	piRNA	0	1
21ur-11415	piRNA	0	1
21ur-11416	piRNA	0	1
21ur-11417	piRNA	0	1
21ur-11419	piRNA	0	1
21ur-1142	piRNA	0	1
21ur-11420	piRNA	0	1
21ur-11421	piRNA	0	1
21ur-11423	piRNA	0	1
21ur-11424	piRNA	0	1
21ur-11425	piRNA	0	1
21ur-11426	piRNA	0	1
21ur-11427	piRNA	0	1
21ur-11428	piRNA	0	1
21ur-11429	piRNA	0	1
21ur-1143	piRNA	0	1
21ur-11430	piRNA	0	1
21ur-11431	piRNA	0	1
21ur-11432	piRNA	0	1
21ur-11433	piRNA	0	1
21ur-11434	piRNA	0	1
21ur-11435	piRNA	0	1
[truncated: 13,820 more rows]

## Sheet: 2C-E DP degron miRNAs piRNAs
2-cell embryo (2C-E) miRNAs and piRNAs in DP degron Auxin vs control
miRNA in bold correspond to DE miRNAs (log2 fold change ≤ -0.5 or ≥ 0.5 and FDR ≤ 0.05) and Yolk-enriched miRNAs are labelled in green. Results from three biological replicates.
Name	type	log2(FC)	FDR
let-7-5p	miRNA	-0.148673	0.861446
lin-4-5p	miRNA	-0.794328	0.214797
mir-48-5p	miRNA	-0.759873	0.148561
mir-124-3p	miRNA	1.30503	0.64087
mir-1-3p	miRNA	0.466241	0.552426
mir-230-3p	miRNA	0.101988	0.770893
mir-77-5p	miRNA	3.32878	0.00303014
mir-232-3p	miRNA	1.56727	0.5305
mir-233-3p	miRNA	1.65644	0.44254
mir-234-3p	miRNA	0.502799	0.754429
mir-235-3p	miRNA	0.231885	0.688899
mir-236-3p	miRNA	1.47812	0.406288
mir-237-5p	miRNA	-0.0462205	0.927081
mir-238-3p	miRNA	0.504231	0.38443
mir-239.1-5p	miRNA	0.0729095	0.856728
mir-239.2-5p	miRNA	0	1
mir-2-3p	miRNA	1.22792	0.581095
mir-77-3p	miRNA	2.13117	3.97479e-06
mir-241-3p	miRNA	-1.40659	0.697369
mir-241-5p	miRNA	-0.603897	0.799919
mir-242-5p	miRNA	1.77987	0.410592
mir-243-3p	miRNA	1.31406	0.240925
mir-244-5p	miRNA	2.1007	1.275e-05
mir-245-3p	miRNA	0.506506	0.875352
mir-246-3p	miRNA	-0.545595	0.290081
mir-248-3p	miRNA	2.16519	0.376633
mir-250-3p	miRNA	-0.178555	0.57425
mir-252-5p	miRNA	0.824751	0.735793
mir-253-3p	miRNA	0.1876	0.817513
mir-259-5p	miRNA	1.02331	0.814836
mir-67-3p	miRNA	1.88777	0.0495309
mir-34-5p	miRNA	0.112031	0.966265
mir-37-3p	miRNA	-0.244147	0.000434862
mir-355-5p	miRNA	1.35208	0.711477
mir-356.2-3p	miRNA	0.454763	0.913847
mir-35-3p	miRNA	-0.206524	0.00029107
mir-44-3p	miRNA	0.602137	0.214797
mir-45-3p	miRNA	0.494275	0.33406
mir-73-3p	miRNA	0.499971	0.00210122
mir-46-3p	miRNA	1.31458	0.340964
mir-46-5p	miRNA	1.06794	0.605337
mir-47-3p	miRNA	0.133427	0.869158
mir-47-5p	miRNA	0.192973	0.948139
mir-49-3p	miRNA	1.82675	7.4148e-11
mir-51-5p	miRNA	0.0349878	0.690545
mir-53-5p	miRNA	0.171252	0.818946
mir-57-5p	miRNA	1.42283	1.43039e-10
mir-231-3p	miRNA	1.37846	0.0268111
mir-228-5p	miRNA	1.27957	5.97164e-10
mir-58.1-5p	miRNA	0.654653	0.525851
mir-59-3p	miRNA	-0.639439	0.551263
mir-60-3p	miRNA	1.46676	0.217247
mir-63-3p	miRNA	2.43774	0.0848813
mir-52-5p	miRNA	0.992962	1.38041e-11
mir-42-3p	miRNA	0.938217	2.70684e-07
mir-64-5p	miRNA	0.02571	0.774669
mir-65-5p	miRNA	0.0465437	0.85988
mir-66-5p	miRNA	-0.044572	0.860358
mir-71-5p	miRNA	-0.299905	0.243815
mir-72-5p	miRNA	-0.0204138	0.861189
mir-74-3p	miRNA	0.677508	0.240068
mir-75-3p	miRNA	2.62231	0.304614
mir-76-3p	miRNA	1.693	0.146343
mir-70-3p	miRNA	0.887077	0.0178767
mir-58.1-3p	miRNA	0.75371	3.27264e-05
mir-82-3p	miRNA	0.738286	0.000483464
mir-55-3p	miRNA	0.669098	0.000483464
mir-56-3p	miRNA	0.641498	0.0039715
mir-240-3p	miRNA	-1.25279	0.00424771
mir-79-3p	miRNA	0.760701	0.18148
mir-795-5p	miRNA	-1.6096	0.609044
mir-80-3p	miRNA	-0.0547173	0.95025
mir-80-5p	miRNA	0.279406	0.784934
mir-81-3p	miRNA	0.380523	0.295122
mir-83-3p	miRNA	1.63544	0.568543
mir-84-5p	miRNA	-0.858556	0.278325
mir-86-5p	miRNA	0.825472	0.26055
mir-90-3p	miRNA	0.196721	0.445983
mir-786-3p	miRNA	-1.28636	0.0321748
mir-36-3p	miRNA	-0.0685737	0.765907
mir-38-3p	miRNA	-0.0272821	0.892547
mir-85-3p	miRNA	-1.50921	0.024086
mir-40-3p	miRNA	0.0770992	0.608376
mir-41-3p	miRNA	-0.406952	0.478155
F39B1.3-5p	miRNA	0	1
let-7-3p	miRNA	0	1
lin-4-3p	miRNA	0	1
mir-48-3p	miRNA	-0.449808	0.924315
lsy-6-3p	miRNA	0.744419	0.809582
lsy-6-5p	miRNA	0	1
mir-1018-3p	miRNA	-0.268471	0.85809
mir-1019-3p	miRNA	0	1
mir-1019-5p	miRNA	0	1
mir-1020-3p	miRNA	-1.89913	0.589551
mir-1020-5p	miRNA	-0.774533	0.833529
mir-1021-5p	miRNA	0	1
mir-1022-3p	miRNA	0	1
mir-1022-5p	miRNA	-0.217089	0.896011
mir-124-5p	miRNA	0.724202	0.732043
mir-1-5p	miRNA	0	1
mir-1817-5p	miRNA	0	1
mir-1818-5p	miRNA	0	1
mir-1819-3p	miRNA	-0.925902	0.738089
mir-1819-5p	miRNA	0	1
mir-1820-3p	miRNA	0	1
mir-1820-5p	miRNA	1.41116	0.720885
mir-1821-3p	miRNA	0.392959	0.802111
mir-1821-5p	miRNA	0	1
mir-1822-3p	miRNA	2.11132	0.405608
mir-1822-5p	miRNA	2.50592	0.223139
mir-1823-3p	miRNA	0	1
mir-1823-5p	miRNA	0	1
mir-1824-3p	miRNA	0	1
mir-1824-5p	miRNA	0	1
mir-1828-3p	miRNA	0	1
mir-1829.1-3p	miRNA	0.557428	0.910315
mir-1829.1-5p	miRNA	-0.310038	0.764277
mir-1829.2-3p	miRNA	0.253029	0.926443
mir-1829.2-5p	miRNA	0.25758	0.575257
mir-1829.3-3p	miRNA	1.06629	0.68059
mir-1829.3-5p	miRNA	0.370563	0.528777
mir-1830-3p	miRNA	0	1
mir-1830-5p	miRNA	0	1
mir-1832.1-3p	miRNA	0	1
mir-1832.1-5p	miRNA	0	1
mir-1832.2-3p	miRNA	0	1
mir-1832.2-5p	miRNA	0	1
mir-1833-3p	miRNA	0	1
mir-2207-3p	miRNA	0	1
mir-2207-5p	miRNA	0	1
mir-2208.1-3p	miRNA	0	1
mir-2208.1-5p	miRNA	1.24854	0.833474
mir-2208.2-3p	miRNA	0	1
mir-2208.2-5p	miRNA	0	1
mir-2209.1-3p	miRNA	-0.763446	0.658011
mir-2209.1-5p	miRNA	0	1
mir-2209.2-3p	miRNA	0	1
mir-2209.2-5p	miRNA	0	1
mir-2209.3-3p	miRNA	0.738794	0.912815
mir-2209.3-5p	miRNA	0	1
mir-2210-3p	miRNA	0	1
mir-2210-5p	miRNA	0	1
mir-2211-3p	miRNA	0	1
mir-2211-5p	miRNA	0	1
mir-2212-3p	miRNA	0	1
mir-2212-5p	miRNA	1.11481	0.665345
mir-2213-3p	miRNA	0	1
mir-2213-5p	miRNA	2.32726	0.354273
mir-2214-3p	miRNA	-0.420379	0.473767
mir-2214-5p	miRNA	-0.478034	0.0177077
mir-2215-3p	miRNA	0	1
mir-2215-5p	miRNA	0	1
mir-2216-3p	miRNA	0	1
mir-2216-5p	miRNA	0	1
mir-2217.1-3p	miRNA	0	1
mir-2217.1-5p	miRNA	0	1
mir-2217.2-3p	miRNA	0	1
mir-2217.2-5p	miRNA	0	1
mir-2217.3-3p	miRNA	0	1
mir-2217.3-5p	miRNA	0	1
mir-2217.4-3p	miRNA	0	1
mir-2217.4-5p	miRNA	0	1
mir-2217.5-3p	miRNA	0	1
mir-2217.5-5p	miRNA	0	1
mir-2218.1-3p	miRNA	0	1
mir-2218.1-5p	miRNA	0	1
mir-2218.2-3p	miRNA	0	1
mir-2218.2-5p	miRNA	0	1
mir-2219-3p	miRNA	0	1
mir-2219-5p	miRNA	0	1
mir-2220-3p	miRNA	0.277297	0.771813
mir-2220-5p	miRNA	0	1
mir-2221-3p	miRNA	0	1
mir-228-3p	miRNA	1.18287	0.748804
mir-39-3p	miRNA	-0.228898	0.0453433
mir-229-3p	miRNA	0.433094	0.720007
mir-229-5p	miRNA	0.0812534	0.766779
mir-230-5p	miRNA	-0.39115	0.871499
mir-231-5p	miRNA	1.79087	0.504684
mir-232-5p	miRNA	0	1
mir-233-5p	miRNA	0	1
mir-234-5p	miRNA	0	1
mir-235-5p	miRNA	1.84849	0.526693
mir-236-5p	miRNA	1.49572	0.562466
mir-237-3p	miRNA	0	1
mir-238-5p	miRNA	0.80462	0.719549
mir-239.1-3p	miRNA	0	1
mir-239.2-3p	miRNA	0	1
mir-240-5p	miRNA	-1.80086	0.214797
mir-243-5p	miRNA	0.749155	0.909876
mir-244-3p	miRNA	0	1
mir-245-5p	miRNA	0	1
mir-246-5p	miRNA	-0.353378	0.90089
mir-247-3p	miRNA	-0.0177845	0.821803
mir-247-5p	miRNA	0	1
mir-249-3p	miRNA	-0.00749528	0.902528
mir-249-5p	miRNA	0	1
mir-250-5p	miRNA	-0.202133	0.809402
mir-251-5p	miRNA	2.92775	0.214797
mir-252-3p	miRNA	0	1
mir-253-5p	miRNA	0	1
mir-254-3p	miRNA	1.76236	0.574236
mir-254-5p	miRNA	0	1
mir-255-3p	miRNA	0	1
mir-255-5p	miRNA	-0.0321496	0.837441
mir-256-3p	miRNA	0	1
mir-257-5p	miRNA	0.092408	0.798781
mir-258.1-5p	miRNA	-0.260386	0.850649
mir-258.2-5p	miRNA	-0.174722	0.90583
mir-259-3p	miRNA	1.41113	0.604012
mir-260-3p	miRNA	0.474005	0.832596
mir-261-3p	miRNA	0	1
mir-262-3p	miRNA	1.34518	0.731477
mir-264-3p	miRNA	0	1
mir-265-3p	miRNA	0	1
mir-266-5p	miRNA	0	1
mir-267-5p	miRNA	0	1
mir-268-5p	miRNA	0	1
mir-269-5p	miRNA	0	1
mir-270-3p	miRNA	0	1
mir-271-5p	miRNA	0	1
mir-272-3p	miRNA	0	1
mir-273-3p	miRNA	0	1
mir-2953-3p	miRNA	0	1
mir-2953-5p	miRNA	0	1
mir-34-3p	miRNA	-0.375453	0.758868
mir-353-5p	miRNA	-0.992254	0.327656
mir-354-3p	miRNA	-0.461832	0.857837
mir-355-3p	miRNA	0	1
mir-356.1-5p	miRNA	0	1
mir-356.2-5p	miRNA	0	1
mir-357-3p	miRNA	-2.43505	0.381026
mir-357-5p	miRNA	0	1
mir-358-3p	miRNA	-0.940097	0.797706
mir-358-5p	miRNA	-0.0344561	0.918679
mir-359-3p	miRNA	0.683131	0.629021
mir-360-3p	miRNA	0	1
mir-360-5p	miRNA	0	1
mir-392-3p	miRNA	0	1
mir-392-5p	miRNA	0	1
mir-43-3p	miRNA	0.718968	0.168734
mir-43-5p	miRNA	0.712445	0.761574
mir-44-5p	miRNA	0.621284	0.835154
mir-45-5p	miRNA	0.456075	0.931533
mir-4805-3p	miRNA	0	1
mir-4805-5p	miRNA	0	1
mir-4806-3p	miRNA	0	1
mir-4806-5p	miRNA	0	1
mir-4807-3p	miRNA	0.641663	0.566312
mir-4808-3p	miRNA	0	1
mir-4808-5p	miRNA	0	1
mir-4809-3p	miRNA	1.24428	0.693993
mir-4809-5p	miRNA	0	1
mir-4810.1-3p	miRNA	0	1
mir-4810.2-3p	miRNA	0	1
mir-4810.2-5p	miRNA	0	1
mir-4811-3p	miRNA	0	1
mir-4811-5p	miRNA	0	1
mir-4812-3p	miRNA	0	1
mir-4812-5p	miRNA	-0.0132306	0.866942
mir-4813-3p	miRNA	0.83554	0.786928
mir-4813-5p	miRNA	-0.454513	0.929581
mir-4814-3p	miRNA	0	1
mir-4814-5p	miRNA	0	1
mir-4815-3p	miRNA	0	1
mir-4916-3p	miRNA	0.077774	0.798265
mir-4916-5p	miRNA	-0.801125	0.896532
mir-4920-5p	miRNA	0	1
mir-4921-3p	miRNA	0	1
mir-4922.1-3p	miRNA	0	1
mir-4922.2-3p	miRNA	0	1
mir-4923.1-3p	miRNA	0.474738	0.93591
mir-4923.2-3p	miRNA	-1.00875	0.738573
mir-4924-5p	miRNA	0	1
mir-4925-3p	miRNA	0	1
mir-4926-5p	miRNA	0	1
mir-4927-5p	miRNA	0	1
mir-4929-3p	miRNA	0	1
mir-4930-5p	miRNA	0	1
mir-4931-3p	miRNA	0	1
mir-4932-5p	miRNA	0	1
mir-4933-5p	miRNA	0	1
mir-4934-3p	miRNA	0	1
mir-4935-5p	miRNA	0	1
mir-4936-3p	miRNA	-0.537469	0.625073
mir-4937-5p	miRNA	-0.776775	0.848728
mir-4938-5p	miRNA	0	1
mir-49-5p	miRNA	1.19775	0.761691
mir-50-3p	miRNA	0	1
mir-50-5p	miRNA	0.25677	0.794073
mir-51-3p	miRNA	0.285941	0.847141
mir-52-3p	miRNA	1.3254	0.652041
mir-53-3p	miRNA	0.567789	0.874165
mir-54-3p	miRNA	0.627854	0.14513
mir-54-5p	miRNA	0.561283	0.576331
mir-5545-3p	miRNA	0	1
mir-5545-5p	miRNA	0	1
mir-5546-3p	miRNA	2.17064	0.422616
mir-5546-5p	miRNA	0	1
mir-5547-3p	miRNA	0	1
mir-5547-5p	miRNA	0	1
mir-5548-3p	miRNA	0	1
mir-5548-5p	miRNA	0	1
mir-5549-3p	miRNA	-0.989391	0.826215
mir-5549-5p	miRNA	0	1
mir-5550-3p	miRNA	0	1
mir-5550-5p	miRNA	0	1
mir-5551-3p	miRNA	0	1
mir-5551-5p	miRNA	0.122166	0.966913
mir-5552-3p	miRNA	0	1
mir-5552-5p	miRNA	0	1
mir-5553-3p	miRNA	0	1
mir-5553-5p	miRNA	0	1
mir-55-5p	miRNA	0.748347	0.734995
mir-5592.1-3p	miRNA	-0.563063	0.761178
mir-5592.1-5p	miRNA	-0.382333	0.884863
mir-5592.2-3p	miRNA	-0.493875	0.635974
mir-5592.2-5p	miRNA	0	1
mir-5593.1-3p	miRNA	0	1
mir-5593.1-5p	miRNA	0	1
mir-5593.2-3p	miRNA	0	1
mir-5593.2-5p	miRNA	0	1
mir-5594-3p	miRNA	0	1
mir-5594-5p	miRNA	0	1
mir-5595-3p	miRNA	0	1
mir-5595-5p	miRNA	0	1
mir-56-5p	miRNA	0.379196	0.820381
mir-57-3p	miRNA	0	1
mir-58.2-3p	miRNA	-0.655926	0.862706
mir-58.2-5p	miRNA	1.67544	0.635726
miR58Synth	miRNA	0.298549	0.78364
mir-59-5p	miRNA	0	1
mir-60-5p	miRNA	1.54051	0.56931
mir-61-3p	miRNA	-0.195918	0.3428
mir-61-5p	miRNA	0.124399	0.808775
mir-2-5p	miRNA	1.21482	0.0039715
mir-62-3p	miRNA	1.2238	0.772008
mir-63-5p	miRNA	2.07367	0.576199
mir-64-3p	miRNA	-0.201019	0.811212
mir-65-3p	miRNA	-0.81394	0.861897
mir-66-3p	miRNA	0.436436	0.810044
mir-67-5p	miRNA	0.13692	0.818257
mir-70-5p	miRNA	0.632632	0.881546
mir-71-3p	miRNA	0.391733	0.801477
mir-72-3p	miRNA	-0.640243	0.63952
mir-73-5p	miRNA	-0.554712	0.743861
mir-74-5p	miRNA	-1.18947	0.683529
mir-75-5p	miRNA	1.6425	0.61564
mir-76-5p	miRNA	0	1
mir-78-3p	miRNA	0	1
mir-784-3p	miRNA	0	1
mir-784-5p	miRNA	0	1
mir-785-3p	miRNA	0.920153	0.715384
mir-785-5p	miRNA	0	1
mir-786-5p	miRNA	0	1
mir-787-3p	miRNA	0.223214	0.885152
mir-787-5p	miRNA	0	1
mir-788-3p	miRNA	3.32034	0.125035
mir-788-5p	miRNA	0	1
mir-789.1-3p	miRNA	0	1
mir-789.1-5p	miRNA	1.78053	0.546473
mir-789.2-3p	miRNA	-0.15492	0.811652
mir-789.2-5p	miRNA	2.9075	0.239946
mir-790-3p	miRNA	-0.148686	0.811778
mir-790-5p	miRNA	0	1
mir-791-3p	miRNA	1.98201	0.605925
mir-791-5p	miRNA	0.327111	0.844233
mir-792-3p	miRNA	0	1
mir-792-5p	miRNA	0	1
mir-793-3p	miRNA	0.272498	0.814176
mir-794-3p	miRNA	0	1
mir-794-5p	miRNA	0.231647	0.945293
mir-795-3p	miRNA	0	1
mir-79-5p	miRNA	0.0251485	0.874078
mir-796-5p	miRNA	1.32602	0.76638
mir-797-3p	miRNA	0	1
mir-797-5p	miRNA	0.112992	0.868656
mir-798-3p	miRNA	-0.951055	0.697265
mir-799-3p	miRNA	1.97667	0.441324
mir-800-3p	miRNA	1.14133	0.686655
mir-800-5p	miRNA	0	1
mir-81-5p	miRNA	1.53278	0.677065
mir-8186.1-3p	miRNA	0	1
mir-8186.1-5p	miRNA	0	1
mir-8186.2-3p	miRNA	0	1
mir-8186.2-5p	miRNA	0	1
mir-8187-3p	miRNA	0	1
mir-8187-5p	miRNA	0	1
mir-8188-3p	miRNA	0	1
mir-8188-5p	miRNA	0	1
mir-8189-3p	miRNA	0	1
mir-8189-5p	miRNA	0	1
mir-8190-3p	miRNA	0	1
mir-8190-5p	miRNA	0	1
mir-8191-3p	miRNA	0	1
mir-8191-5p	miRNA	-0.234678	0.785879
mir-8192-3p	miRNA	0	1
mir-8192-5p	miRNA	0	1
mir-8193-3p	miRNA	0	1
mir-8193-5p	miRNA	0	1
mir-8194-3p	miRNA	0	1
mir-8194-5p	miRNA	0	1
mir-8195-3p	miRNA	0	1
mir-8195-5p	miRNA	0.426197	0.786864
mir-8196.1-3p	miRNA	0.753843	0.782345
mir-8196.1-5p	miRNA	0	1
mir-8196.2-3p	miRNA	-0.170318	0.818884
mir-8196.2-5p	miRNA	-0.338812	0.930954
mir-8197-3p	miRNA	0	1
mir-8197-5p	miRNA	0	1
mir-8198-5p	miRNA	0	1
mir-8200-3p	miRNA	0	1
mir-8200-5p	miRNA	0	1
mir-8201-3p	miRNA	0	1
mir-8201-5p	miRNA	0	1
mir-8202-3p	miRNA	0	1
mir-8203-3p	miRNA	0	1
mir-8203-5p	miRNA	0	1
mir-8204-3p	miRNA	0	1
mir-8204-5p	miRNA	0	1
mir-8205-3p	miRNA	0	1
mir-8205-5p	miRNA	0	1
mir-8206-3p	miRNA	0	1
mir-8206-5p	miRNA	0	1
mir-8207-3p	miRNA	0	1
mir-8207-5p	miRNA	0	1
mir-8208-3p	miRNA	0	1
mir-8208-5p	miRNA	0	1
mir-8209-3p	miRNA	0	1
mir-8209-5p	miRNA	0	1
mir-8210-3p	miRNA	0	1
mir-8210-5p	miRNA	0	1
mir-8211-3p	miRNA	0	1
mir-8211-5p	miRNA	0	1
mir-8212-3p	miRNA	0	1
mir-8212-5p	miRNA	0	1
mir-82-5p	miRNA	0.307715	0.925903
mir-83-5p	miRNA	0.217878	0.966791
mir-84-3p	miRNA	-0.436618	0.957074
mir-85-5p	miRNA	0	1
mir-86-3p	miRNA	1.18262	0.636571
mir-87-3p	miRNA	1.11151	0.214797
mir-87-5p	miRNA	-0.10438	0.831019
mir-90-5p	miRNA	0.997865	0.720762
mir-35-5p	miRNA	-0.168748	0.861662
mir-36-5p	miRNA	-0.825305	0.75955
mir-37-5p	miRNA	-0.00752871	0.821018
mir-38-5p	miRNA	-0.458004	0.447904
mir-39-5p	miRNA	0.376013	0.923456
mir-40-5p	miRNA	1.35021	0.773226
mir-41-5p	miRNA	-0.405854	0.428033
mir-42-5p	miRNA	0.314259	0.789003
21ur-1	piRNA	0	1
21ur-10	piRNA	-0.529117	0.759346
21ur-100	piRNA	0.0186202	0.939023
21ur-1000	piRNA	0.481058	0.712932
21ur-10000	piRNA	0	1
21ur-10001	piRNA	0	1
21ur-10002	piRNA	0	1
21ur-10003	piRNA	0	1
21ur-10004	piRNA	0	1
21ur-10005	piRNA	0	1
21ur-10007	piRNA	0	1
21ur-10008	piRNA	0	1
21ur-10009	piRNA	0	1
21ur-1001	piRNA	0.685467	0.735071
21ur-10010	piRNA	0	1
21ur-10011	piRNA	0	1
21ur-10012	piRNA	-0.183321	0.855113
21ur-10013	piRNA	0	1
21ur-10014	piRNA	0	1
21ur-10015	piRNA	0	1
21ur-10016	piRNA	0.0128491	0.889337
21ur-10017	piRNA	0	1
21ur-10018	piRNA	0	1
21ur-10019	piRNA	0	1
21ur-1002	piRNA	-0.137869	0.943812
21ur-10020	piRNA	0	1
21ur-10021	piRNA	0	1
21ur-10022	piRNA	-1.23094	0.638729
21ur-10023	piRNA	0	1
21ur-10024	piRNA	0	1
21ur-10025	piRNA	0	1
21ur-10026	piRNA	0	1
21ur-10027	piRNA	0	1
21ur-10029	piRNA	0.315176	0.899886
21ur-1003	piRNA	0	1
21ur-10030	piRNA	0	1
21ur-10031	piRNA	0	1
21ur-10032	piRNA	1.47093	0.641575
21ur-10033	piRNA	0	1
21ur-10034	piRNA	0	1
21ur-10035	piRNA	0.521301	0.91322
21ur-10036	piRNA	0	1
21ur-10037	piRNA	0.316621	0.841041
21ur-10038	piRNA	0	1
21ur-10039	piRNA	0	1
21ur-1004	piRNA	0	1
21ur-10040	piRNA	0	1
21ur-10042	piRNA	0	1
21ur-10043	piRNA	0	1
21ur-10044	piRNA	0	1
21ur-10045	piRNA	0	1
21ur-10046	piRNA	-0.228758	0.942321
21ur-10047	piRNA	0	1
21ur-10048	piRNA	0	1
21ur-10049	piRNA	0	1
21ur-1005	piRNA	-0.905981	0.113015
21ur-10050	piRNA	0	1
21ur-10051	piRNA	0	1
21ur-10052	piRNA	0.0658629	0.844457
21ur-10053	piRNA	0	1
21ur-10054	piRNA	0	1
21ur-10055	piRNA	0	1
21ur-10056	piRNA	0	1
21ur-10057	piRNA	0	1
21ur-10058	piRNA	0	1
21ur-10059	piRNA	0	1
21ur-1006	piRNA	0	1
21ur-10060	piRNA	0	1
21ur-10061	piRNA	-1.29082	0.738843
21ur-10062	piRNA	0	1
21ur-10063	piRNA	0	1
21ur-10064	piRNA	0	1
21ur-10065	piRNA	0	1
21ur-10066	piRNA	0	1
21ur-10067	piRNA	0	1
21ur-10068	piRNA	0	1
21ur-10069	piRNA	0	1
21ur-1007	piRNA	0	1
21ur-10070	piRNA	0	1
21ur-10071	piRNA	0	1
21ur-10072	piRNA	0	1
21ur-10073	piRNA	0	1
21ur-10074	piRNA	0	1
21ur-10075	piRNA	0	1
21ur-10076	piRNA	0	1
21ur-10077	piRNA	0	1
21ur-10078	piRNA	1.03142	0.78165
21ur-10079	piRNA	0.905098	0.779368
21ur-1008	piRNA	0	1
21ur-10080	piRNA	0	1
21ur-10081	piRNA	0	1
21ur-10082	piRNA	0	1
21ur-10083	piRNA	0	1
21ur-10084	piRNA	0	1
21ur-10085	piRNA	0	1
21ur-10086	piRNA	0	1
21ur-10087	piRNA	0	1
21ur-10088	piRNA	0.733187	0.727313
21ur-10089	piRNA	0	1
21ur-1009	piRNA	-0.803303	0.548994
21ur-10091	piRNA	0	1
21ur-10092	piRNA	0	1
21ur-10093	piRNA	0	1
21ur-10094	piRNA	-2.72094	0.148561
21ur-10095	piRNA	-0.547953	0.769084
21ur-10096	piRNA	0	1
21ur-10097	piRNA	-0.233682	0.813889
21ur-10098	piRNA	0	1
21ur-10099	piRNA	0	1
21ur-101	piRNA	0	1
21ur-1010	piRNA	0	1
21ur-10100	piRNA	0	1
21ur-10101	piRNA	0	1
21ur-10102	piRNA	0	1
21ur-10103	piRNA	0	1
21ur-10104	piRNA	0	1
21ur-10105	piRNA	0	1
21ur-10106	piRNA	0	1
21ur-10107	piRNA	0	1
21ur-10108	piRNA	0	1
21ur-10109	piRNA	0	1
21ur-1011	piRNA	0.196374	0.803631
21ur-10110	piRNA	0	1
21ur-10111	piRNA	0	1
21ur-10112	piRNA	-0.271151	0.929533
21ur-10113	piRNA	0	1
21ur-10114	piRNA	-0.328858	0.830969
21ur-10115	piRNA	0	1
21ur-10116	piRNA	0	1
21ur-10117	piRNA	0	1
21ur-10118	piRNA	0.72464	0.792972
21ur-10119	piRNA	0	1
21ur-1012	piRNA	0	1
21ur-10120	piRNA	0	1
21ur-10121	piRNA	0	1
21ur-10122	piRNA	0	1
21ur-10123	piRNA	0	1
21ur-10124	piRNA	-1.44896	0.61462
21ur-10125	piRNA	0	1
21ur-10126	piRNA	0	1
21ur-10127	piRNA	0	1
21ur-10128	piRNA	0	1
21ur-10129	piRNA	0	1
21ur-1013	piRNA	-0.219894	0.84865
21ur-10130	piRNA	0	1
21ur-10131	piRNA	0	1
21ur-10132	piRNA	0	1
21ur-10134	piRNA	0	1
21ur-10135	piRNA	-0.221298	0.880032
21ur-10136	piRNA	0	1
21ur-10137	piRNA	0	1
21ur-10138	piRNA	0	1
21ur-10139	piRNA	0	1
21ur-1014	piRNA	0.328499	0.821577
21ur-10140	piRNA	0	1
21ur-10141	piRNA	0	1
21ur-10142	piRNA	0	1
21ur-10143	piRNA	0	1
21ur-10144	piRNA	0	1
21ur-10145	piRNA	0	1
21ur-10146	piRNA	0	1
21ur-10147	piRNA	0	1
21ur-10148	piRNA	0	1
21ur-10149	piRNA	0	1
21ur-1015	piRNA	-0.802123	0.877469
21ur-10150	piRNA	0	1
21ur-10151	piRNA	0	1
21ur-10152	piRNA	0	1
21ur-10153	piRNA	0	1
21ur-10154	piRNA	-0.981568	0.636053
21ur-10155	piRNA	0	1
21ur-10156	piRNA	1.16419	0.664779
21ur-10157	piRNA	0	1
21ur-10158	piRNA	0	1
21ur-10159	piRNA	0	1
21ur-1016	piRNA	0	1
21ur-10160	piRNA	0	1
21ur-10161	piRNA	0	1
21ur-10162	piRNA	0	1
21ur-10163	piRNA	0	1
21ur-10164	piRNA	-1.44766	0.728664
21ur-10165	piRNA	0	1
21ur-10166	piRNA	0	1
21ur-10167	piRNA	-1.53922	0.601581
21ur-10168	piRNA	0	1
21ur-10169	piRNA	0	1
21ur-1017	piRNA	0	1
21ur-10170	piRNA	0	1
21ur-10171	piRNA	0.954565	0.715515
21ur-10172	piRNA	0	1
21ur-10173	piRNA	0	1
21ur-10174	piRNA	0	1
21ur-10175	piRNA	0	1
21ur-10176	piRNA	0.86283	0.772813
21ur-10177	piRNA	0	1
21ur-10179	piRNA	0	1
21ur-1018	piRNA	0	1
21ur-10180	piRNA	-2.4178	0.261162
21ur-10181	piRNA	0	1
21ur-10183	piRNA	0	1
21ur-10184	piRNA	0.857454	0.82379
21ur-10185	piRNA	0.864582	0.677748
21ur-10186	piRNA	0	1
21ur-10187	piRNA	0	1
21ur-10188	piRNA	0.191867	0.796571
21ur-10189	piRNA	0	1
21ur-1019	piRNA	0	1
21ur-10190	piRNA	-0.513045	0.654471
21ur-10191	piRNA	0	1
21ur-10193	piRNA	0	1
21ur-10194	piRNA	0	1
21ur-10195	piRNA	0	1
21ur-10196	piRNA	0	1
21ur-10197	piRNA	0	1
21ur-10198	piRNA	0	1
21ur-10199	piRNA	1.29621	0.254842
21ur-102	piRNA	0	1
21ur-1020	piRNA	0	1
21ur-10200	piRNA	-0.598282	0.735706
21ur-10201	piRNA	-0.352054	0.800465
21ur-10202	piRNA	-1.29828	0.601001
21ur-10204	piRNA	0	1
21ur-10205	piRNA	0	1
21ur-10206	piRNA	0	1
21ur-10207	piRNA	0	1
21ur-10208	piRNA	0	1
21ur-10209	piRNA	0	1
21ur-1021	piRNA	0	1
21ur-10210	piRNA	0	1
21ur-10211	piRNA	0	1
21ur-10212	piRNA	0.623245	0.834527
21ur-10213	piRNA	0.883215	0.724038
21ur-10214	piRNA	0	1
21ur-10215	piRNA	-0.551154	0.840739
21ur-10216	piRNA	-0.361065	0.872037
21ur-10217	piRNA	-0.27979	0.874181
21ur-10218	piRNA	0	1
21ur-10219	piRNA	0	1
21ur-1022	piRNA	-0.352633	0.872571
21ur-10220	piRNA	0	1
21ur-10221	piRNA	0	1
21ur-10222	piRNA	0	1
21ur-10223	piRNA	0	1
21ur-10224	piRNA	0	1
21ur-10225	piRNA	0	1
21ur-10226	piRNA	0	1
21ur-10228	piRNA	0	1
21ur-10229	piRNA	0	1
21ur-1023	piRNA	-1.05681	0.681718
21ur-10230	piRNA	0	1
21ur-10231	piRNA	0	1
21ur-10232	piRNA	0	1
21ur-10233	piRNA	0	1
21ur-10234	piRNA	0	1
21ur-10235	piRNA	0	1
21ur-10236	piRNA	0	1
21ur-10237	piRNA	0	1
21ur-10238	piRNA	-0.479035	0.775871
21ur-10239	piRNA	0	1
21ur-1024	piRNA	0	1
21ur-10240	piRNA	0	1
21ur-10241	piRNA	-0.92125	0.818351
21ur-10242	piRNA	0	1
21ur-10243	piRNA	1.0591	0.730284
21ur-10244	piRNA	0	1
21ur-10245	piRNA	0	1
21ur-10246	piRNA	0	1
21ur-10247	piRNA	0	1
21ur-10248	piRNA	0	1
21ur-10249	piRNA	-0.162501	0.847119
21ur-1025	piRNA	0	1
21ur-10250	piRNA	0	1
21ur-10252	piRNA	0	1
21ur-10254	piRNA	0	1
21ur-10255	piRNA	0	1
21ur-10256	piRNA	0	1
21ur-10257	piRNA	0	1
21ur-10258	piRNA	0	1
21ur-10259	piRNA	0	1
21ur-1026	piRNA	0	1
21ur-10260	piRNA	0	1
21ur-10261	piRNA	0	1
21ur-10262	piRNA	0	1
21ur-10263	piRNA	0	1
21ur-10264	piRNA	0	1
21ur-10265	piRNA	0	1
21ur-10266	piRNA	0	1
21ur-10267	piRNA	0	1
21ur-10268	piRNA	0	1
21ur-10269	piRNA	0	1
21ur-1027	piRNA	0	1
21ur-10270	piRNA	0	1
21ur-10271	piRNA	0	1
21ur-10273	piRNA	0	1
21ur-10274	piRNA	0	1
21ur-10275	piRNA	0	1
21ur-10276	piRNA	0	1
21ur-10277	piRNA	0	1
21ur-10278	piRNA	0	1
21ur-10279	piRNA	0	1
21ur-1028	piRNA	0.711974	0.883805
21ur-10280	piRNA	0	1
21ur-10281	piRNA	0	1
21ur-10282	piRNA	0	1
21ur-10283	piRNA	0	1
21ur-10284	piRNA	0	1
21ur-10285	piRNA	0	1
21ur-10286	piRNA	0	1
21ur-10287	piRNA	0	1
21ur-10289	piRNA	0.628808	0.817475
21ur-1029	piRNA	0	1
21ur-10290	piRNA	0	1
21ur-10291	piRNA	0	1
21ur-10292	piRNA	-1.82142	0.56734
21ur-10293	piRNA	-0.530458	0.797378
21ur-10294	piRNA	0	1
21ur-10295	piRNA	0	1
21ur-10296	piRNA	0	1
21ur-10297	piRNA	0	1
21ur-10298	piRNA	0	1
21ur-10299	piRNA	1.22521	0.788846
21ur-103	piRNA	0.0472779	0.82619
21ur-1030	piRNA	0	1
21ur-10300	piRNA	0	1
21ur-10301	piRNA	0	1
21ur-10302	piRNA	-0.0970559	0.892367
21ur-10303	piRNA	0	1
21ur-10304	piRNA	0	1
21ur-10305	piRNA	-1.42339	0.594692
21ur-10306	piRNA	0	1
21ur-10307	piRNA	0	1
21ur-10308	piRNA	0	1
21ur-10309	piRNA	0	1
21ur-1031	piRNA	0	1
21ur-10310	piRNA	0	1
21ur-10311	piRNA	0	1
21ur-10312	piRNA	0.984714	0.72612
21ur-10313	piRNA	0	1
21ur-10316	piRNA	0	1
21ur-10317	piRNA	0	1
21ur-10318	piRNA	0.118927	0.956049
21ur-10319	piRNA	0	1
21ur-1032	piRNA	0.291949	0.842595
21ur-10320	piRNA	0	1
21ur-10321	piRNA	-0.822707	0.641529
21ur-10322	piRNA	0	1
21ur-10324	piRNA	0	1
21ur-10325	piRNA	0	1
21ur-10326	piRNA	0	1
21ur-10327	piRNA	0	1
21ur-10328	piRNA	-0.392292	0.802409
21ur-10329	piRNA	0	1
21ur-1033	piRNA	0	1
21ur-10331	piRNA	0.597894	0.781115
21ur-10332	piRNA	-1.57818	0.563016
21ur-10333	piRNA	0	1
21ur-10334	piRNA	0	1
21ur-10335	piRNA	0	1
21ur-10336	piRNA	0	1
21ur-10337	piRNA	0	1
21ur-10338	piRNA	0	1
21ur-10339	piRNA	0	1
21ur-1034	piRNA	0	1
21ur-10340	piRNA	0	1
21ur-10341	piRNA	0	1
21ur-10342	piRNA	0	1
21ur-10343	piRNA	0	1
21ur-10344	piRNA	0	1
21ur-10345	piRNA	0	1
21ur-10346	piRNA	0	1
21ur-10347	piRNA	0	1
21ur-10348	piRNA	0	1
21ur-10349	piRNA	-0.756359	0.891344
21ur-1035	piRNA	0	1
21ur-10350	piRNA	0	1
21ur-10351	piRNA	0.60306	0.867697
21ur-10352	piRNA	0	1
21ur-10353	piRNA	0	1
21ur-10354	piRNA	0	1
21ur-10355	piRNA	-0.931891	0.863685
21ur-10356	piRNA	0	1
21ur-10357	piRNA	-2.4434	0.3933
21ur-10358	piRNA	0	1
21ur-10359	piRNA	0	1
21ur-1036	piRNA	-0.358651	0.643919
21ur-10360	piRNA	0	1
21ur-10361	piRNA	0	1
21ur-10362	piRNA	0	1
21ur-10363	piRNA	0	1
21ur-10364	piRNA	0	1
21ur-10365	piRNA	0	1
21ur-10366	piRNA	0	1
21ur-10367	piRNA	0	1
21ur-10368	piRNA	0	1
21ur-10369	piRNA	0	1
21ur-1037	piRNA	0	1
21ur-10370	piRNA	0	1
21ur-10371	piRNA	-1.34786	0.71654
21ur-10372	piRNA	0.900762	0.829395
21ur-10373	piRNA	0	1
21ur-10374	piRNA	0	1
21ur-10375	piRNA	-2.02119	0.442118
21ur-10376	piRNA	0	1
21ur-10377	piRNA	0	1
21ur-10378	piRNA	0	1
21ur-10379	piRNA	0	1
21ur-1038	piRNA	0	1
21ur-10380	piRNA	0	1
21ur-10381	piRNA	0	1
21ur-10382	piRNA	0	1
21ur-10383	piRNA	-0.428649	0.768263
21ur-10384	piRNA	0	1
21ur-10385	piRNA	0	1
21ur-10386	piRNA	0	1
21ur-10387	piRNA	0	1
21ur-10388	piRNA	0	1
21ur-10389	piRNA	0	1
21ur-1039	piRNA	0	1
21ur-10390	piRNA	0	1
21ur-10391	piRNA	0	1
21ur-10392	piRNA	0	1
21ur-10393	piRNA	0	1
21ur-10394	piRNA	0	1
21ur-10395	piRNA	0	1
21ur-10396	piRNA	0	1
21ur-10397	piRNA	0	1
21ur-10398	piRNA	0.850023	0.857601
21ur-10399	piRNA	0	1
21ur-104	piRNA	-0.352142	0.755676
21ur-1040	piRNA	0	1
21ur-10400	piRNA	-2.22047	0.513449
21ur-10401	piRNA	0	1
21ur-10402	piRNA	-0.0397715	0.993999
21ur-10403	piRNA	0	1
21ur-10404	piRNA	0	1
21ur-10406	piRNA	0	1
21ur-10407	piRNA	0	1
21ur-10408	piRNA	0	1
21ur-10409	piRNA	-1.37559	0.789995
21ur-1041	piRNA	0	1
21ur-10410	piRNA	-0.681731	0.829848
21ur-10411	piRNA	0	1
21ur-10412	piRNA	0	1
21ur-10413	piRNA	0	1
21ur-10414	piRNA	0	1
21ur-10415	piRNA	0	1
21ur-10416	piRNA	0	1
21ur-10417	piRNA	0	1
21ur-10418	piRNA	0	1
21ur-10419	piRNA	0	1
21ur-1042	piRNA	0	1
21ur-10420	piRNA	0	1
21ur-10421	piRNA	0	1
21ur-10422	piRNA	0	1
21ur-10423	piRNA	0	1
21ur-10424	piRNA	0	1
21ur-10425	piRNA	0	1
21ur-10426	piRNA	0	1
21ur-10427	piRNA	0	1
21ur-10428	piRNA	-0.289465	0.865147
21ur-10429	piRNA	0	1
21ur-1043	piRNA	0	1
21ur-10430	piRNA	0	1
21ur-10431	piRNA	0	1
21ur-10432	piRNA	0	1
21ur-10433	piRNA	0	1
21ur-10434	piRNA	0	1
21ur-10435	piRNA	0	1
21ur-10436	piRNA	0	1
21ur-10437	piRNA	-0.00348126	0.925334
21ur-10438	piRNA	0	1
21ur-10439	piRNA	-0.405744	0.898055
21ur-1044	piRNA	0	1
21ur-10440	piRNA	0	1
21ur-10441	piRNA	0	1
21ur-10442	piRNA	0.693232	0.834059
21ur-10443	piRNA	0	1
21ur-10444	piRNA	0	1
21ur-10445	piRNA	0	1
21ur-10446	piRNA	1.6675	0.533553
21ur-10447	piRNA	0	1
21ur-10449	piRNA	1.13092	0.718338
21ur-1045	piRNA	0	1
21ur-10450	piRNA	0	1
21ur-10451	piRNA	0	1
21ur-10452	piRNA	0	1
21ur-10453	piRNA	0	1
21ur-10454	piRNA	0	1
21ur-10455	piRNA	0	1
21ur-10456	piRNA	0	1
21ur-10457	piRNA	0	1
21ur-10458	piRNA	0.255049	0.923148
21ur-10459	piRNA	0	1
21ur-1046	piRNA	0	1
21ur-10460	piRNA	0	1
21ur-10461	piRNA	0	1
21ur-10462	piRNA	-2.33853	0.214797
21ur-10463	piRNA	0	1
21ur-10464	piRNA	0	1
21ur-10465	piRNA	0	1
21ur-10466	piRNA	0	1
21ur-10467	piRNA	0	1
21ur-10468	piRNA	0	1
21ur-10469	piRNA	0	1
21ur-1047	piRNA	0	1
21ur-10470	piRNA	0	1
21ur-10471	piRNA	0	1
21ur-10472	piRNA	0	1
21ur-10473	piRNA	0	1
21ur-10474	piRNA	0	1
21ur-10475	piRNA	0.536429	0.910741
21ur-10476	piRNA	0.408599	0.843746
21ur-10477	piRNA	0	1
21ur-10478	piRNA	0	1
21ur-10479	piRNA	0	1
21ur-1048	piRNA	0	1
21ur-10480	piRNA	0	1
21ur-10481	piRNA	0	1
21ur-10482	piRNA	0	1
21ur-10483	piRNA	0	1
21ur-10484	piRNA	0	1
21ur-10485	piRNA	0	1
21ur-10486	piRNA	0	1
21ur-10487	piRNA	-0.619535	0.897594
21ur-10488	piRNA	0	1
21ur-10489	piRNA	0	1
21ur-1049	piRNA	0	1
21ur-10490	piRNA	0	1
21ur-10491	piRNA	0	1
21ur-10492	piRNA	0.23385	0.852627
21ur-10493	piRNA	0	1
21ur-10494	piRNA	0	1
21ur-10495	piRNA	0	1
21ur-10496	piRNA	0	1
21ur-10497	piRNA	0	1
21ur-10498	piRNA	0	1
21ur-10499	piRNA	-0.00244669	0.998095
21ur-105	piRNA	0	1
21ur-1050	piRNA	-0.674739	0.306405
21ur-10500	piRNA	0.360664	0.831168
21ur-10502	piRNA	-0.7854	0.791387
21ur-10503	piRNA	0	1
21ur-10504	piRNA	0	1
21ur-10505	piRNA	0	1
21ur-10506	piRNA	0	1
21ur-10507	piRNA	0.168902	0.901524
21ur-10508	piRNA	0	1
21ur-10509	piRNA	0	1
21ur-1051	piRNA	-0.20723	0.770615
21ur-10510	piRNA	-0.243063	0.844762
21ur-10511	piRNA	2.39932	0.44789
21ur-10512	piRNA	0	1
21ur-10513	piRNA	0	1
21ur-10514	piRNA	-1.31632	0.581929
21ur-10515	piRNA	0	1
21ur-10516	piRNA	0	1
21ur-10517	piRNA	0	1
21ur-10518	piRNA	0.794623	0.662114
21ur-10519	piRNA	0	1
21ur-1052	piRNA	0.0967931	0.869139
21ur-10520	piRNA	0	1
21ur-10521	piRNA	-0.557037	0.81709
21ur-10522	piRNA	0	1
21ur-10523	piRNA	0	1
21ur-10524	piRNA	0	1
21ur-10525	piRNA	0	1
21ur-10526	piRNA	0	1
21ur-10527	piRNA	0	1
21ur-10528	piRNA	-0.440376	0.898413
21ur-10529	piRNA	0	1
21ur-1053	piRNA	-0.731971	0.68296
21ur-10530	piRNA	0	1
21ur-10531	piRNA	0	1
21ur-10532	piRNA	0	1
21ur-10533	piRNA	0	1
21ur-10534	piRNA	0	1
21ur-10535	piRNA	0	1
21ur-10537	piRNA	0	1
21ur-10538	piRNA	0	1
21ur-10539	piRNA	0	1
21ur-1054	piRNA	-0.769802	0.873636
21ur-10540	piRNA	0	1
21ur-10541	piRNA	0	1
21ur-10542	piRNA	0	1
21ur-10543	piRNA	0	1
21ur-10544	piRNA	0	1
21ur-10545	piRNA	0	1
21ur-10546	piRNA	0	1
21ur-10547	piRNA	0	1
21ur-10548	piRNA	0	1
21ur-10549	piRNA	-1.23813	0.816088
21ur-1055	piRNA	0.211139	0.793779
21ur-10550	piRNA	0.209757	0.858481
21ur-10551	piRNA	0	1
21ur-10552	piRNA	0	1
21ur-10553	piRNA	0.452969	0.855935
21ur-10554	piRNA	0	1
21ur-10555	piRNA	0	1
21ur-10556	piRNA	0	1
21ur-10557	piRNA	0	1
21ur-10558	piRNA	0	1
21ur-10559	piRNA	0	1
21ur-1056	piRNA	-1.28662	0.777116
21ur-10560	piRNA	0	1
21ur-10561	piRNA	0	1
21ur-10562	piRNA	0	1
21ur-10563	piRNA	0	1
21ur-10564	piRNA	0	1
21ur-10565	piRNA	0	1
21ur-10566	piRNA	0	1
21ur-10567	piRNA	0	1
21ur-10568	piRNA	0.761287	0.808748
21ur-10569	piRNA	0	1
21ur-1057	piRNA	0.187881	0.898949
21ur-10570	piRNA	0	1
21ur-10571	piRNA	0	1
21ur-10572	piRNA	0	1
21ur-10573	piRNA	0	1
21ur-10574	piRNA	0	1
21ur-10575	piRNA	0	1
21ur-10576	piRNA	0	1
21ur-10577	piRNA	0	1
21ur-10579	piRNA	0	1
21ur-1058	piRNA	0	1
21ur-10580	piRNA	0	1
21ur-10581	piRNA	0	1
21ur-10582	piRNA	0	1
21ur-10583	piRNA	0	1
21ur-10584	piRNA	0.894596	0.672521
21ur-10585	piRNA	0	1
21ur-10587	piRNA	0	1
21ur-10588	piRNA	-0.357448	0.76942
21ur-10589	piRNA	0	1
21ur-1059	piRNA	-0.142288	0.898316
21ur-10590	piRNA	0	1
21ur-10591	piRNA	0	1
21ur-10592	piRNA	0	1
21ur-10593	piRNA	0	1
21ur-10594	piRNA	0	1
21ur-10595	piRNA	-1.05952	0.492697
21ur-10596	piRNA	0	1
21ur-10597	piRNA	0	1
21ur-10598	piRNA	0	1
21ur-10599	piRNA	0	1
21ur-106	piRNA	0	1
21ur-1060	piRNA	0	1
21ur-10600	piRNA	0	1
21ur-10601	piRNA	0	1
21ur-10602	piRNA	0	1
21ur-10604	piRNA	0	1
21ur-10605	piRNA	0	1
21ur-10606	piRNA	-0.861194	0.762276
21ur-10607	piRNA	0.83413	0.865112
21ur-10608	piRNA	0	1
21ur-10609	piRNA	0	1
21ur-1061	piRNA	0	1
21ur-10610	piRNA	0	1
21ur-10611	piRNA	0	1
21ur-10612	piRNA	0	1
21ur-10613	piRNA	0	1
21ur-10614	piRNA	0	1
21ur-10615	piRNA	0	1
21ur-10616	piRNA	0	1
21ur-10617	piRNA	0	1
21ur-10618	piRNA	0	1
21ur-10619	piRNA	0	1
21ur-1062	piRNA	0	1
21ur-10620	piRNA	0	1
21ur-10621	piRNA	0	1
21ur-10622	piRNA	0	1
21ur-10623	piRNA	0	1
21ur-10624	piRNA	0	1
21ur-10625	piRNA	0	1
21ur-10626	piRNA	0	1
21ur-10627	piRNA	0	1
21ur-10628	piRNA	0	1
21ur-10629	piRNA	0	1
21ur-1063	piRNA	-0.611926	0.50924
21ur-10630	piRNA	0	1
21ur-10631	piRNA	0	1
21ur-10632	piRNA	0	1
21ur-10633	piRNA	0	1
21ur-10634	piRNA	0	1
21ur-10635	piRNA	0	1
21ur-10636	piRNA	1.58459	0.686636
21ur-10637	piRNA	0	1
21ur-10638	piRNA	0	1
21ur-10639	piRNA	0	1
21ur-1064	piRNA	0	1
21ur-10640	piRNA	0	1
21ur-10641	piRNA	0	1
21ur-10642	piRNA	0	1
21ur-10643	piRNA	0	1
21ur-10644	piRNA	0	1
21ur-10645	piRNA	0	1
21ur-10646	piRNA	0.579455	0.822269
21ur-10647	piRNA	0	1
21ur-10648	piRNA	0	1
21ur-10649	piRNA	0	1
21ur-1065	piRNA	-0.883692	0.525853
21ur-10650	piRNA	0	1
21ur-10651	piRNA	0	1
21ur-10652	piRNA	0	1
21ur-10653	piRNA	0	1
21ur-10654	piRNA	0	1
21ur-10655	piRNA	0	1
21ur-10656	piRNA	-0.524684	0.861516
21ur-10657	piRNA	0	1
21ur-10658	piRNA	0	1
21ur-10659	piRNA	0	1
21ur-1066	piRNA	-2.11683	0.606007
21ur-10660	piRNA	-1.29706	0.645951
21ur-10661	piRNA	0	1
21ur-10662	piRNA	0	1
21ur-10663	piRNA	0	1
21ur-10664	piRNA	0	1
21ur-10665	piRNA	0	1
21ur-10666	piRNA	0	1
21ur-10667	piRNA	0	1
21ur-10668	piRNA	0	1
21ur-10669	piRNA	0	1
21ur-1067	piRNA	0	1
21ur-10670	piRNA	0	1
21ur-10671	piRNA	0	1
21ur-10672	piRNA	0	1
21ur-10673	piRNA	0	1
21ur-10674	piRNA	0	1
21ur-10675	piRNA	0	1
21ur-10676	piRNA	0	1
21ur-10677	piRNA	0	1
21ur-10678	piRNA	0	1
21ur-10679	piRNA	0	1
21ur-1068	piRNA	0.602621	0.874016
21ur-10680	piRNA	0	1
21ur-10681	piRNA	0	1
21ur-10682	piRNA	0	1
21ur-10683	piRNA	0	1
21ur-10684	piRNA	0	1
21ur-10685	piRNA	0	1
21ur-10686	piRNA	-0.873319	0.669825
21ur-10687	piRNA	-0.376493	0.763395
21ur-10688	piRNA	-0.112421	0.952498
21ur-10689	piRNA	0	1
21ur-1069	piRNA	0.479148	0.569336
21ur-10690	piRNA	0	1
21ur-10691	piRNA	0.570625	0.790911
21ur-10692	piRNA	0	1
21ur-10693	piRNA	0	1
21ur-10694	piRNA	0.0560396	0.936209
21ur-10695	piRNA	0	1
21ur-10696	piRNA	0	1
21ur-10697	piRNA	-0.580557	0.906212
21ur-10698	piRNA	0	1
21ur-10699	piRNA	0	1
21ur-107	piRNA	0.888885	0.758592
21ur-1070	piRNA	2.15466	0.0634994
21ur-10700	piRNA	-0.855136	0.820047
21ur-10701	piRNA	0	1
21ur-10702	piRNA	0	1
21ur-10703	piRNA	0	1
21ur-10704	piRNA	0	1
21ur-10705	piRNA	0	1
21ur-10706	piRNA	0	1
21ur-10708	piRNA	0	1
21ur-10709	piRNA	0	1
21ur-1071	piRNA	-0.735792	0.881889
21ur-10710	piRNA	0	1
21ur-10711	piRNA	0	1
21ur-10712	piRNA	0	1
21ur-10713	piRNA	0	1
21ur-10714	piRNA	0	1
21ur-10715	piRNA	0	1
21ur-10716	piRNA	0	1
21ur-10717	piRNA	0	1
21ur-10718	piRNA	0	1
21ur-10719	piRNA	0	1
21ur-1072	piRNA	0.880742	0.747597
21ur-10720	piRNA	0	1
21ur-10721	piRNA	0	1
21ur-10722	piRNA	-0.348462	0.89232
21ur-10723	piRNA	0	1
21ur-10724	piRNA	0	1
21ur-10725	piRNA	0	1
21ur-10726	piRNA	0	1
21ur-10727	piRNA	0	1
21ur-10728	piRNA	0	1
21ur-10729	piRNA	0	1
21ur-1073	piRNA	-0.526915	0.64906
21ur-10730	piRNA	0	1
21ur-10731	piRNA	0	1
21ur-10732	piRNA	0	1
21ur-10733	piRNA	0	1
21ur-10734	piRNA	0	1
21ur-10735	piRNA	0	1
21ur-10736	piRNA	0	1
21ur-10737	piRNA	0	1
21ur-10738	piRNA	0	1
21ur-10739	piRNA	0	1
21ur-1074	piRNA	0	1
21ur-10740	piRNA	0.726538	0.904985
21ur-10741	piRNA	0	1
21ur-10742	piRNA	0	1
21ur-10743	piRNA	-1.0048	0.83842
21ur-10744	piRNA	0	1
21ur-10745	piRNA	0	1
21ur-10746	piRNA	0	1
21ur-10747	piRNA	0	1
21ur-10748	piRNA	0	1
21ur-10749	piRNA	0	1
21ur-1075	piRNA	0.075262	0.863213
21ur-10750	piRNA	0	1
21ur-10751	piRNA	0	1
21ur-10752	piRNA	0	1
21ur-10753	piRNA	0	1
21ur-10754	piRNA	0	1
21ur-10755	piRNA	0	1
21ur-10756	piRNA	0	1
21ur-10757	piRNA	0	1
21ur-10758	piRNA	0	1
21ur-10759	piRNA	0.179328	0.836448
21ur-1076	piRNA	0	1
21ur-10760	piRNA	0	1
21ur-10761	piRNA	0.187823	0.917159
21ur-10762	piRNA	0	1
21ur-10763	piRNA	0	1
21ur-10764	piRNA	1.08501	0.828551
21ur-10765	piRNA	0	1
21ur-10766	piRNA	0	1
21ur-10767	piRNA	0	1
21ur-10768	piRNA	0	1
21ur-10769	piRNA	0	1
21ur-1077	piRNA	-0.598828	0.761245
21ur-10770	piRNA	0	1
21ur-10771	piRNA	0	1
21ur-10772	piRNA	-0.227796	0.870738
21ur-10773	piRNA	-1.96271	0.463481
21ur-10774	piRNA	0.331713	0.792481
21ur-10775	piRNA	0	1
21ur-10776	piRNA	0	1
21ur-10777	piRNA	0	1
21ur-10778	piRNA	0	1
21ur-10779	piRNA	0	1
21ur-1078	piRNA	-0.148698	0.731007
21ur-10780	piRNA	0	1
21ur-10781	piRNA	0	1
21ur-10782	piRNA	0.571517	0.908118
21ur-10783	piRNA	-0.0906621	0.79542
21ur-10784	piRNA	0	1
21ur-10785	piRNA	0	1
21ur-10786	piRNA	0	1
21ur-10787	piRNA	0	1
21ur-10788	piRNA	0	1
21ur-10789	piRNA	-0.66085	0.808074
21ur-1079	piRNA	-0.293084	0.636733
21ur-10790	piRNA	0.352864	0.832263
21ur-10791	piRNA	0	1
21ur-10792	piRNA	0	1
21ur-10793	piRNA	0	1
21ur-10794	piRNA	0	1
21ur-10795	piRNA	0	1
21ur-10796	piRNA	0	1
21ur-10797	piRNA	0	1
21ur-10798	piRNA	-1.04184	0.844496
21ur-10799	piRNA	0	1
21ur-108	piRNA	-0.114479	0.882835
21ur-1080	piRNA	0	1
21ur-10800	piRNA	0	1
21ur-10801	piRNA	0	1
21ur-10802	piRNA	0	1
21ur-10803	piRNA	0	1
21ur-10804	piRNA	0	1
21ur-10805	piRNA	0	1
21ur-10806	piRNA	0	1
21ur-10807	piRNA	0	1
21ur-10808	piRNA	0	1
21ur-10809	piRNA	0	1
21ur-1081	piRNA	0.901943	0.765207
21ur-10810	piRNA	0	1
21ur-10811	piRNA	0	1
21ur-10812	piRNA	0	1
21ur-10813	piRNA	0	1
21ur-10814	piRNA	0	1
21ur-10815	piRNA	0	1
21ur-10816	piRNA	0	1
21ur-10817	piRNA	0	1
21ur-10818	piRNA	0	1
21ur-10819	piRNA	0	1
21ur-1082	piRNA	-1.79731	0.676096
21ur-10820	piRNA	-0.545007	0.785064
21ur-10821	piRNA	0	1
21ur-10822	piRNA	-1.60018	0.705906
21ur-10823	piRNA	0	1
21ur-10824	piRNA	0	1
21ur-10825	piRNA	0	1
21ur-10826	piRNA	0	1
21ur-10827	piRNA	0	1
21ur-10828	piRNA	0	1
21ur-10829	piRNA	0	1
21ur-1083	piRNA	0.0484729	0.788999
21ur-10831	piRNA	0	1
21ur-10832	piRNA	0	1
21ur-10833	piRNA	0	1
21ur-10834	piRNA	0	1
21ur-10835	piRNA	0	1
21ur-10836	piRNA	0	1
21ur-10837	piRNA	0	1
21ur-10838	piRNA	0	1
21ur-10839	piRNA	0	1
21ur-1084	piRNA	0	1
21ur-10840	piRNA	0	1
21ur-10841	piRNA	-0.199974	0.955988
21ur-10842	piRNA	-0.476984	0.769243
21ur-10843	piRNA	0	1
21ur-10844	piRNA	0	1
21ur-10845	piRNA	0	1
21ur-10846	piRNA	0	1
21ur-10847	piRNA	0	1
21ur-10848	piRNA	0.182028	0.865255
21ur-1085	piRNA	0	1
21ur-10850	piRNA	0	1
21ur-10851	piRNA	-0.854807	0.908891
21ur-10852	piRNA	0	1
21ur-10853	piRNA	0	1
21ur-10854	piRNA	0	1
21ur-10855	piRNA	0	1
21ur-10856	piRNA	0	1
21ur-10857	piRNA	0	1
21ur-10858	piRNA	-0.534566	0.716685
21ur-10859	piRNA	0	1
21ur-1086	piRNA	0.303571	0.877047
21ur-10860	piRNA	1.56745	0.645484
21ur-10861	piRNA	0	1
21ur-10862	piRNA	0	1
21ur-10863	piRNA	0	1
21ur-10864	piRNA	0	1
21ur-10865	piRNA	0	1
21ur-10866	piRNA	0	1
21ur-10867	piRNA	0	1
21ur-10868	piRNA	0	1
21ur-10869	piRNA	0	1
21ur-1087	piRNA	-0.0658047	0.888708
21ur-10870	piRNA	0	1
21ur-10871	piRNA	0	1
21ur-10873	piRNA	0	1
21ur-10875	piRNA	0	1
21ur-10876	piRNA	0	1
21ur-10877	piRNA	0	1
21ur-10878	piRNA	0	1
21ur-10879	piRNA	0	1
21ur-1088	piRNA	-0.00303801	0.878795
21ur-10880	piRNA	0	1
21ur-10881	piRNA	0	1
21ur-10882	piRNA	0.5067	0.798219
21ur-10883	piRNA	0	1
21ur-10884	piRNA	0	1
21ur-10885	piRNA	0	1
21ur-10886	piRNA	0	1
21ur-10887	piRNA	0.933735	0.73506
21ur-10888	piRNA	0	1
21ur-10889	piRNA	0	1
21ur-1089	piRNA	-0.57624	0.861218
21ur-10890	piRNA	0	1
21ur-10891	piRNA	0	1
21ur-10892	piRNA	-0.678694	0.757095
21ur-10893	piRNA	0	1
21ur-10894	piRNA	0	1
21ur-10895	piRNA	0	1
21ur-10896	piRNA	0	1
21ur-10897	piRNA	0	1
21ur-10898	piRNA	0	1
21ur-10899	piRNA	0	1
21ur-109	piRNA	0	1
21ur-1090	piRNA	-0.522125	0.767827
21ur-10900	piRNA	0	1
21ur-10901	piRNA	0	1
21ur-10902	piRNA	0	1
21ur-10903	piRNA	0	1
21ur-10904	piRNA	0	1
21ur-10905	piRNA	0	1
21ur-10906	piRNA	0	1
21ur-10907	piRNA	0	1
21ur-10908	piRNA	0	1
21ur-10909	piRNA	0	1
21ur-1091	piRNA	-0.481204	0.751752
21ur-10910	piRNA	0	1
21ur-10911	piRNA	0	1
21ur-10912	piRNA	0	1
21ur-10913	piRNA	0	1
21ur-10914	piRNA	0	1
21ur-10915	piRNA	0	1
21ur-10916	piRNA	0	1
21ur-10917	piRNA	0	1
21ur-10918	piRNA	0	1
21ur-10919	piRNA	0	1
21ur-1092	piRNA	0	1
21ur-10920	piRNA	0	1
21ur-10921	piRNA	0	1
21ur-10922	piRNA	0	1
21ur-10923	piRNA	0	1
21ur-10924	piRNA	0	1
21ur-10926	piRNA	0	1
21ur-10927	piRNA	0	1
21ur-10928	piRNA	0	1
21ur-10929	piRNA	0	1
21ur-1093	piRNA	2.10435	0.429489
21ur-10930	piRNA	0	1
21ur-10931	piRNA	-1.58647	0.57226
21ur-10932	piRNA	0	1
21ur-10933	piRNA	0	1
21ur-10934	piRNA	0	1
21ur-10935	piRNA	0	1
21ur-10936	piRNA	0	1
21ur-10937	piRNA	0	1
21ur-10938	piRNA	0	1
21ur-10939	piRNA	0	1
21ur-1094	piRNA	0	1
21ur-10940	piRNA	0	1
21ur-10941	piRNA	0	1
21ur-10942	piRNA	0	1
21ur-10944	piRNA	-2.04513	0.610953
21ur-10945	piRNA	0	1
21ur-10946	piRNA	0	1
21ur-10947	piRNA	0	1
21ur-10948	piRNA	0	1
21ur-10949	piRNA	0	1
21ur-1095	piRNA	0	1
21ur-10950	piRNA	0	1
21ur-10951	piRNA	0	1
21ur-10952	piRNA	0	1
21ur-10953	piRNA	0	1
21ur-10954	piRNA	0	1
21ur-10955	piRNA	0	1
21ur-10956	piRNA	0	1
21ur-10957	piRNA	0	1
21ur-10958	piRNA	0	1
21ur-10959	piRNA	0	1
21ur-1096	piRNA	0	1
21ur-10960	piRNA	-1.75508	0.533739
21ur-10961	piRNA	0	1
21ur-10962	piRNA	0	1
21ur-10963	piRNA	0	1
21ur-10964	piRNA	0	1
21ur-10965	piRNA	-0.390976	0.903796
21ur-10966	piRNA	0	1
21ur-10967	piRNA	0	1
21ur-10968	piRNA	0	1
21ur-10969	piRNA	0	1
21ur-1097	piRNA	-0.277014	0.771709
21ur-10970	piRNA	0	1
21ur-10971	piRNA	0	1
21ur-10972	piRNA	0	1
21ur-10973	piRNA	0	1
21ur-10974	piRNA	0	1
21ur-10975	piRNA	0	1
21ur-10976	piRNA	0	1
21ur-10977	piRNA	0	1
21ur-10978	piRNA	0	1
21ur-10979	piRNA	0	1
21ur-1098	piRNA	0	1
21ur-10980	piRNA	0	1
21ur-10981	piRNA	0	1
21ur-10982	piRNA	0	1
21ur-10983	piRNA	-0.198845	0.922346
21ur-10984	piRNA	0	1
21ur-10985	piRNA	-0.605954	0.740779
21ur-10986	piRNA	0	1
21ur-10988	piRNA	0	1
21ur-10989	piRNA	0	1
21ur-1099	piRNA	0.572261	0.84326
21ur-10990	piRNA	0	1
21ur-10992	piRNA	0	1
21ur-10993	piRNA	0	1
21ur-10994	piRNA	0	1
21ur-10995	piRNA	0	1
21ur-10996	piRNA	0	1
21ur-10997	piRNA	0	1
21ur-10998	piRNA	0	1
21ur-10999	piRNA	0.0468139	0.903047
21ur-11	piRNA	0	1
21ur-110	piRNA	0	1
21ur-1100	piRNA	0	1
21ur-11000	piRNA	0	1
21ur-11001	piRNA	0	1
21ur-11002	piRNA	0	1
21ur-11003	piRNA	0	1
21ur-11004	piRNA	0	1
21ur-11005	piRNA	0	1
21ur-11006	piRNA	0	1
21ur-11007	piRNA	0.528694	0.797469
21ur-11008	piRNA	0	1
21ur-11009	piRNA	0	1
21ur-1101	piRNA	0	1
21ur-11010	piRNA	0	1
21ur-11011	piRNA	0	1
21ur-11012	piRNA	0	1
21ur-11013	piRNA	0.842534	0.881556
21ur-11014	piRNA	-1.40273	0.669821
21ur-11015	piRNA	0	1
21ur-11016	piRNA	0	1
21ur-11017	piRNA	0	1
21ur-11018	piRNA	0	1
21ur-11019	piRNA	0	1
21ur-1102	piRNA	0	1
21ur-11020	piRNA	0	1
21ur-11021	piRNA	0	1
21ur-11022	piRNA	0	1
21ur-11023	piRNA	0	1
21ur-11024	piRNA	0	1
21ur-11025	piRNA	0	1
21ur-11026	piRNA	0	1
21ur-11027	piRNA	0	1
21ur-11028	piRNA	-0.434528	0.756624
21ur-11029	piRNA	0	1
21ur-1103	piRNA	0	1
21ur-11030	piRNA	0	1
21ur-11031	piRNA	-0.0106272	0.992862
21ur-11032	piRNA	0	1
21ur-11033	piRNA	0	1
21ur-11034	piRNA	0	1
21ur-11035	piRNA	0	1
21ur-11036	piRNA	0	1
21ur-11037	piRNA	0	1
21ur-11038	piRNA	0	1
21ur-11039	piRNA	0	1
21ur-1104	piRNA	0.170641	0.954005
21ur-11040	piRNA	0	1
21ur-11041	piRNA	0	1
21ur-11042	piRNA	0	1
21ur-11043	piRNA	0	1
21ur-11044	piRNA	0	1
21ur-11045	piRNA	0.432502	0.56666
21ur-11046	piRNA	0	1
21ur-11047	piRNA	0	1
21ur-11049	piRNA	0	1
21ur-1105	piRNA	0	1
21ur-11050	piRNA	-1.38213	0.564939
21ur-11051	piRNA	0	1
21ur-11052	piRNA	0	1
21ur-11054	piRNA	0.571517	0.858002
21ur-11056	piRNA	0	1
21ur-11057	piRNA	0	1
21ur-11058	piRNA	0	1
21ur-11059	piRNA	0.156048	0.973861
21ur-1106	piRNA	0	1
21ur-11060	piRNA	0	1
21ur-11061	piRNA	0	1
21ur-11062	piRNA	0	1
21ur-11063	piRNA	0	1
21ur-11064	piRNA	0	1
21ur-11065	piRNA	0	1
21ur-11066	piRNA	0	1
21ur-11067	piRNA	1.50968	0.60245
21ur-11068	piRNA	0	1
21ur-11069	piRNA	0	1
21ur-1107	piRNA	0.347559	0.81035
21ur-11070	piRNA	0	1
21ur-11071	piRNA	0	1
21ur-11072	piRNA	0	1
21ur-11073	piRNA	0	1
21ur-11074	piRNA	0	1
21ur-11075	piRNA	0	1
21ur-11076	piRNA	0.050091	0.869983
21ur-11077	piRNA	0	1
21ur-11078	piRNA	0	1
21ur-11079	piRNA	0	1
21ur-1108	piRNA	0	1
21ur-11080	piRNA	0	1
21ur-11081	piRNA	0	1
21ur-11082	piRNA	0	1
21ur-11083	piRNA	0	1
21ur-11084	piRNA	0	1
21ur-11085	piRNA	0	1
21ur-11086	piRNA	0	1
21ur-11087	piRNA	0	1
21ur-11088	piRNA	0	1
21ur-11089	piRNA	0	1
21ur-1109	piRNA	0.0467195	0.799498
21ur-11090	piRNA	0	1
21ur-11091	piRNA	0	1
21ur-11092	piRNA	0.167864	0.892049
21ur-11093	piRNA	0	1
21ur-11094	piRNA	0	1
21ur-11095	piRNA	0	1
21ur-11096	piRNA	0	1
21ur-11097	piRNA	0	1
21ur-11098	piRNA	0	1
21ur-11099	piRNA	0	1
21ur-111	piRNA	0	1
21ur-1110	piRNA	0	1
21ur-11100	piRNA	0	1
21ur-11101	piRNA	0	1
21ur-11102	piRNA	0	1
21ur-11104	piRNA	0	1
21ur-11105	piRNA	-0.868879	0.711465
21ur-11106	piRNA	0	1
21ur-11107	piRNA	0	1
21ur-11108	piRNA	0	1
21ur-11109	piRNA	0	1
21ur-11110	piRNA	0	1
21ur-11111	piRNA	0	1
21ur-11112	piRNA	0	1
21ur-11113	piRNA	0	1
21ur-11115	piRNA	1.23513	0.730473
21ur-11116	piRNA	0	1
21ur-11117	piRNA	0	1
21ur-11118	piRNA	0	1
21ur-11119	piRNA	0	1
21ur-1112	piRNA	0	1
21ur-11120	piRNA	0	1
21ur-11121	piRNA	0	1
21ur-11122	piRNA	0	1
21ur-11123	piRNA	0	1
21ur-11124	piRNA	0	1
21ur-11125	piRNA	0	1
21ur-11126	piRNA	0	1
21ur-11127	piRNA	0	1
21ur-11128	piRNA	0	1
21ur-11129	piRNA	0	1
21ur-1113	piRNA	0	1
21ur-11130	piRNA	0	1
21ur-11131	piRNA	0	1
21ur-11132	piRNA	0	1
21ur-11133	piRNA	0	1
21ur-11135	piRNA	0	1
21ur-11136	piRNA	0	1
21ur-11137	piRNA	0	1
21ur-11138	piRNA	0	1
21ur-11139	piRNA	0	1
21ur-1114	piRNA	-0.0359932	0.838976
21ur-11140	piRNA	0	1
21ur-11141	piRNA	0	1
21ur-11142	piRNA	0	1
21ur-11143	piRNA	0	1
21ur-11144	piRNA	0	1
21ur-11145	piRNA	0	1
21ur-11146	piRNA	0	1
21ur-11147	piRNA	0	1
21ur-11148	piRNA	0	1
21ur-11149	piRNA	0	1
21ur-1115	piRNA	-0.507734	0.828757
21ur-11150	piRNA	0	1
21ur-11151	piRNA	0	1
21ur-11152	piRNA	0	1
21ur-11153	piRNA	0	1
21ur-11154	piRNA	0	1
21ur-11155	piRNA	0	1
21ur-11156	piRNA	0	1
21ur-11157	piRNA	0	1
21ur-11158	piRNA	0	1
21ur-11159	piRNA	0	1
21ur-1116	piRNA	0	1
21ur-11160	piRNA	0	1
21ur-11161	piRNA	-1.22853	0.741971
21ur-11162	piRNA	0	1
21ur-11164	piRNA	0	1
21ur-11165	piRNA	0	1
21ur-11166	piRNA	0	1
21ur-11167	piRNA	0	1
21ur-11168	piRNA	0	1
21ur-11169	piRNA	0	1
21ur-1117	piRNA	0.427746	0.893459
21ur-11171	piRNA	0	1
21ur-11172	piRNA	-0.21568	0.838495
21ur-11173	piRNA	0	1
21ur-11174	piRNA	0	1
21ur-11175	piRNA	0	1
21ur-11176	piRNA	0	1
21ur-11177	piRNA	-1.39766	0.751833
21ur-11178	piRNA	0	1
21ur-11179	piRNA	0	1
21ur-1118	piRNA	-0.0923245	0.977887
21ur-11180	piRNA	1.87469	0.690142
21ur-11181	piRNA	0	1
21ur-11182	piRNA	0	1
21ur-11183	piRNA	0	1
21ur-11184	piRNA	0	1
21ur-11185	piRNA	0	1
21ur-11186	piRNA	0	1
21ur-11187	piRNA	0	1
21ur-11188	piRNA	-0.807431	0.739141
21ur-11189	piRNA	0	1
21ur-1119	piRNA	0.193207	0.834519
21ur-11190	piRNA	0	1
21ur-11191	piRNA	0	1
21ur-11192	piRNA	0	1
21ur-11193	piRNA	0	1
21ur-11194	piRNA	0	1
21ur-11195	piRNA	0	1
21ur-11196	piRNA	0	1
21ur-11197	piRNA	0	1
21ur-11198	piRNA	-0.753838	0.860897
21ur-11199	piRNA	0	1
21ur-112	piRNA	-1.06005	0.735118
21ur-1120	piRNA	0	1
21ur-11200	piRNA	0	1
21ur-11201	piRNA	-1.48567	0.663189
21ur-11202	piRNA	0	1
21ur-11203	piRNA	0	1
21ur-11204	piRNA	0	1
21ur-11205	piRNA	0	1
21ur-11206	piRNA	0	1
21ur-11207	piRNA	0	1
21ur-11208	piRNA	0	1
21ur-11209	piRNA	0	1
21ur-1121	piRNA	-0.341837	0.666975
21ur-11210	piRNA	0	1
21ur-11211	piRNA	0	1
21ur-11212	piRNA	0	1
21ur-11213	piRNA	0	1
21ur-11214	piRNA	0	1
21ur-11215	piRNA	0	1
21ur-11216	piRNA	0	1
21ur-11217	piRNA	-0.470648	0.817115
21ur-11218	piRNA	0	1
21ur-11219	piRNA	-0.620538	0.849495
21ur-1122	piRNA	-0.218573	0.686817
21ur-11220	piRNA	0	1
21ur-11221	piRNA	0	1
21ur-11222	piRNA	0	1
21ur-11223	piRNA	0	1
21ur-11224	piRNA	0	1
21ur-11225	piRNA	0	1
21ur-11226	piRNA	0	1
21ur-11227	piRNA	0	1
21ur-11228	piRNA	0	1
21ur-11229	piRNA	0.282165	0.82054
21ur-1123	piRNA	0	1
21ur-11230	piRNA	1.5713	0.524163
21ur-11231	piRNA	0	1
21ur-11232	piRNA	0	1
21ur-11233	piRNA	0	1
21ur-11234	piRNA	0	1
21ur-11235	piRNA	0	1
21ur-11236	piRNA	0	1
21ur-11237	piRNA	0.546951	0.742443
21ur-11238	piRNA	0.493347	0.903598
21ur-11239	piRNA	0.605481	0.903004
21ur-1124	piRNA	-0.443932	0.500924
21ur-11240	piRNA	0	1
21ur-11241	piRNA	0	1
21ur-11242	piRNA	0	1
21ur-11243	piRNA	0	1
21ur-11244	piRNA	0	1
21ur-11245	piRNA	0	1
21ur-11246	piRNA	0	1
21ur-11247	piRNA	0	1
21ur-11248	piRNA	0	1
21ur-11249	piRNA	0	1
21ur-1125	piRNA	0	1
21ur-11250	piRNA	0	1
21ur-11251	piRNA	0	1
21ur-11252	piRNA	0	1
21ur-11253	piRNA	0	1
21ur-11254	piRNA	-1.31447	0.802477
21ur-11255	piRNA	0	1
21ur-11256	piRNA	0	1
21ur-11257	piRNA	0	1
21ur-11258	piRNA	0	1
21ur-11259	piRNA	0	1
21ur-1126	piRNA	-0.574919	0.592116
21ur-11260	piRNA	0	1
21ur-11261	piRNA	0	1
21ur-11262	piRNA	0	1
21ur-11263	piRNA	0	1
21ur-11264	piRNA	0	1
21ur-11265	piRNA	0	1
21ur-11266	piRNA	0	1
21ur-11267	piRNA	-0.567601	0.910229
21ur-11268	piRNA	0	1
21ur-11269	piRNA	0	1
21ur-1127	piRNA	0	1
21ur-11270	piRNA	-0.360921	0.844739
21ur-11271	piRNA	0.984297	0.771065
21ur-11272	piRNA	0	1
21ur-11274	piRNA	0	1
21ur-11275	piRNA	0	1
21ur-11277	piRNA	0	1
21ur-11278	piRNA	0	1
21ur-11279	piRNA	0	1
21ur-1128	piRNA	-0.531278	0.539359
21ur-11280	piRNA	0	1
21ur-11281	piRNA	0	1
21ur-11282	piRNA	-0.640501	0.834584
21ur-11283	piRNA	0	1
21ur-11285	piRNA	0	1
21ur-11286	piRNA	0	1
21ur-11287	piRNA	0	1
21ur-11289	piRNA	0	1
21ur-1129	piRNA	0	1
21ur-11290	piRNA	0	1
21ur-11291	piRNA	0	1
21ur-11292	piRNA	0	1
21ur-11293	piRNA	0	1
21ur-11294	piRNA	0	1
21ur-11295	piRNA	0	1
21ur-11296	piRNA	0.713271	0.730466
21ur-11297	piRNA	0	1
21ur-11298	piRNA	0	1
21ur-11299	piRNA	0	1
21ur-113	piRNA	-0.571207	0.848241
21ur-1130	piRNA	-0.588263	0.592174
21ur-11300	piRNA	0	1
21ur-11301	piRNA	-0.0543403	0.962855
21ur-11302	piRNA	0	1
21ur-11303	piRNA	0	1
21ur-11304	piRNA	0	1
21ur-11305	piRNA	-0.182122	0.883476
21ur-11306	piRNA	0	1
21ur-11308	piRNA	0	1
21ur-11309	piRNA	0	1
21ur-1131	piRNA	0	1
21ur-11310	piRNA	0	1
21ur-11311	piRNA	-0.517231	0.839387
21ur-11312	piRNA	0	1
21ur-11313	piRNA	0	1
21ur-11314	piRNA	0	1
21ur-11315	piRNA	0	1
21ur-11316	piRNA	0	1
21ur-11317	piRNA	-0.594846	0.788584
21ur-11318	piRNA	0	1
21ur-11319	piRNA	0	1
21ur-1132	piRNA	0	1
21ur-11320	piRNA	0	1
21ur-11321	piRNA	-0.770219	0.733527
21ur-11322	piRNA	0	1
21ur-11323	piRNA	0	1
21ur-11324	piRNA	0	1
21ur-11325	piRNA	1.21471	0.731688
21ur-11326	piRNA	0.660696	0.830731
21ur-11327	piRNA	0	1
21ur-11328	piRNA	-1.25399	0.797509
21ur-11329	piRNA	0	1
21ur-1133	piRNA	0	1
21ur-11330	piRNA	-1.63485	0.533778
21ur-11331	piRNA	0	1
21ur-11332	piRNA	0	1
21ur-11333	piRNA	0	1
21ur-11334	piRNA	0	1
21ur-11335	piRNA	0	1
21ur-11336	piRNA	0	1
21ur-11337	piRNA	0	1
21ur-11338	piRNA	0	1
21ur-11339	piRNA	0	1
21ur-1134	piRNA	-0.853925	0.708257
21ur-11340	piRNA	0	1
21ur-11341	piRNA	0	1
21ur-11342	piRNA	0	1
21ur-11343	piRNA	0	1
21ur-11344	piRNA	0	1
21ur-11345	piRNA	0	1
21ur-11346	piRNA	0	1
21ur-11347	piRNA	0	1
21ur-11348	piRNA	0	1
21ur-11349	piRNA	0	1
21ur-1135	piRNA	-0.0723423	0.966872
21ur-11350	piRNA	0	1
21ur-11351	piRNA	0	1
21ur-11352	piRNA	0	1
21ur-11353	piRNA	0	1
21ur-11354	piRNA	0	1
21ur-11355	piRNA	0	1
21ur-11357	piRNA	0	1
21ur-11358	piRNA	0	1
21ur-11359	piRNA	0	1
21ur-11360	piRNA	0	1
21ur-11361	piRNA	0	1
21ur-11362	piRNA	0	1
21ur-11363	piRNA	0	1
21ur-11364	piRNA	0	1
21ur-11365	piRNA	0	1
21ur-11366	piRNA	0	1
21ur-11367	piRNA	0	1
21ur-11368	piRNA	0	1
21ur-11369	piRNA	0	1
21ur-1137	piRNA	0	1
21ur-11370	piRNA	0	1
21ur-11371	piRNA	0	1
21ur-11373	piRNA	0	1
21ur-11374	piRNA	0.781617	0.784036
21ur-11375	piRNA	0	1
21ur-11376	piRNA	0	1
21ur-11377	piRNA	0	1
21ur-11378	piRNA	1.05587	0.684894
21ur-11379	piRNA	0	1
21ur-1138	piRNA	0	1
21ur-11380	piRNA	0	1
21ur-11381	piRNA	0	1
21ur-11382	piRNA	0	1
21ur-11383	piRNA	0	1
21ur-11384	piRNA	0	1
21ur-11385	piRNA	0.37775	0.775822
21ur-11386	piRNA	0	1
21ur-11387	piRNA	0	1
21ur-11388	piRNA	0	1
21ur-11389	piRNA	0	1
21ur-1139	piRNA	0	1
21ur-11390	piRNA	0	1
21ur-11391	piRNA	0	1
21ur-11392	piRNA	0	1
21ur-11393	piRNA	0	1
21ur-11394	piRNA	0	1
21ur-11395	piRNA	0	1
21ur-11396	piRNA	0	1
21ur-11397	piRNA	0	1
21ur-11398	piRNA	0	1
21ur-11399	piRNA	0	1
21ur-114	piRNA	0.823257	0.838824
21ur-1140	piRNA	0	1
21ur-11400	piRNA	0	1
21ur-11401	piRNA	0	1
21ur-11402	piRNA	0	1
21ur-11403	piRNA	0	1
21ur-11404	piRNA	0	1
21ur-11405	piRNA	0	1
21ur-11406	piRNA	0	1
21ur-11407	piRNA	0	1
21ur-11408	piRNA	0	1
21ur-11409	piRNA	0	1
21ur-1141	piRNA	0	1
21ur-11410	piRNA	0	1
21ur-11411	piRNA	0	1
21ur-11412	piRNA	0	1
21ur-11413	piRNA	0	1
21ur-11414	piRNA	0	1
21ur-11415	piRNA	0	1
21ur-11416	piRNA	0	1
21ur-11417	piRNA	0	1
21ur-11419	piRNA	0	1
21ur-1142	piRNA	0	1
21ur-11420	piRNA	0	1
21ur-11421	piRNA	0	1
21ur-11423	piRNA	0	1
21ur-11424	piRNA	0	1
21ur-11425	piRNA	0	1
21ur-11426	piRNA	0	1
21ur-11427	piRNA	0	1
21ur-11428	piRNA	0	1
21ur-11429	piRNA	0	1
21ur-1143	piRNA	0	1
21ur-11430	piRNA	0	1
21ur-11431	piRNA	0	1
21ur-11432	piRNA	0	1
21ur-11433	piRNA	0	1
21ur-11434	piRNA	0	1
21ur-11435	piRNA	0	1
[truncated: 13,820 more rows]

## Sheet: YA DP degron miRNA and piRNAs
Young Adult (YA) miRNAs and piRNAs in DP degron Auxin vs control
miRNA in bold correspond to DE miRNAs (log2 fold change ≤ -0.5 or ≥ 0.5 and FDR ≤ 0.05). Results from three biological replicates.
Name	type	log2(FC)	FDR
mir-63-3p	miRNA	2.86677	1.76799e-78
mir-60-3p	miRNA	1.91501	1.97763e-52
mir-248-3p	miRNA	2.76825	2.45591e-24
mir-70-3p	miRNA	1.08077	1.95011e-21
mir-77-3p	miRNA	2.86685	8.59869e-20
mir-83-3p	miRNA	1.18883	4.3196e-18
mir-63-5p	miRNA	2.1957	1.46657e-16
mir-77-5p	miRNA	3.42127	5.15316e-11
mir-239.1-5p	miRNA	0.956559	7.3072e-10
mir-75-5p	miRNA	2.5314	6.36779e-08
mir-238-3p	miRNA	0.664274	1.70107e-07
mir-8196.1-3p	miRNA	-2.03345	1.63326e-06
mir-66-5p	miRNA	0.588427	1.62259e-05
mir-75-3p	miRNA	2.32418	0.000250615
mir-58.1-5p	miRNA	0.904836	0.000298377
mir-229-5p	miRNA	0.569956	0.000782757
mir-799-3p	miRNA	1.23999	0.000782757
mir-65-5p	miRNA	0.49469	0.00233646
mir-236-3p	miRNA	1.55115	0.00250944
let-7-5p	miRNA	0.507753	0.00322411
mir-82-3p	miRNA	0.510832	0.00322411
mir-80-5p	miRNA	0.513226	0.0063059
mir-71-3p	miRNA	0.737443	0.00775785
mir-4916-3p	miRNA	-0.780995	0.0205997
mir-5592.1-3p	miRNA	0.576386	0.0508251
mir-64-5p	miRNA	0.440015	0.0669492
mir-242-5p	miRNA	0.598534	0.0772998
mir-232-3p	miRNA	0.513602	0.0933326
mir-76-3p	miRNA	-0.429469	0.0933998
mir-234-3p	miRNA	-0.429908	0.0989863
mir-72-5p	miRNA	0.39455	0.0989863
mir-5592.2-3p	miRNA	0.534179	0.142884
mir-90-3p	miRNA	-0.373141	0.261079
mir-236-5p	miRNA	1.12897	0.291071
mir-58.1-3p	miRNA	0.362446	0.291071
mir-786-3p	miRNA	-0.334279	0.291071
mir-1020-3p	miRNA	-0.613292	0.292785
mir-84-5p	miRNA	0.383355	0.292785
mir-83-5p	miRNA	1.05496	0.368529
mir-237-5p	miRNA	0.366745	0.428073
mir-70-5p	miRNA	0.795222	0.529691
mir-357-3p	miRNA	-0.599857	0.580844
mir-47-3p	miRNA	0.324299	0.674499
mir-37-3p	miRNA	-0.267675	0.848767
mir-355-5p	miRNA	0.382293	0.905474
mir-246-3p	miRNA	0.305204	0.939735
mir-35-3p	miRNA	-0.294923	0.939735
mir-71-5p	miRNA	0.303194	0.945023
lin-4-5p	miRNA	-0.118368	0.999981
lin-58-5p	miRNA	-0.0203402	0.999981
lsy-6-3p	miRNA	-0.969877	0.999981
mir-1022-5p	miRNA	-0.435061	0.999981
mir-124-3p	miRNA	-0.209554	0.999981
mir-1-3p	miRNA	-0.034282	0.999981
mir-1-5p	miRNA	-0.31437	0.999981
mir-1817-5p	miRNA	-0.572247	0.999981
mir-1820-5p	miRNA	-0.127802	0.999981
mir-1822-3p	miRNA	0.899891	0.999981
mir-1829.1-3p	miRNA	-0.587775	0.999981
mir-1829.1-5p	miRNA	-0.462572	0.999981
mir-1829.2-5p	miRNA	0.156997	0.999981
mir-1829.3-5p	miRNA	-0.00714446	0.999981
mir-2214-5p	miRNA	0.000670328	0.999981
mir-228-5p	miRNA	-0.0934105	0.999981
mir-230-3p	miRNA	0.241487	0.999981
mir-230-5p	miRNA	-0.409084	0.999981
mir-231-3p	miRNA	-0.127743	0.999981
mir-233-3p	miRNA	0.035168	0.999981
mir-235-3p	miRNA	0.250506	0.999981
mir-235-5p	miRNA	-0.215071	0.999981
mir-238-5p	miRNA	0.972934	0.999981
mir-239.1-3p	miRNA	0.380678	0.999981
mir-2-3p	miRNA	-0.127725	0.999981
mir-240-3p	miRNA	-0.24113	0.999981
mir-240-5p	miRNA	-0.318632	0.999981
mir-241-3p	miRNA	0.317738	0.999981
mir-241-5p	miRNA	-0.00182368	0.999981
mir-244-5p	miRNA	-0.167591	0.999981
mir-245-3p	miRNA	-0.19654	0.999981
mir-246-5p	miRNA	0.393848	0.999981
mir-250-3p	miRNA	0.020552	0.999981
mir-250-5p	miRNA	0.178993	0.999981
mir-252-5p	miRNA	-0.15523	0.999981
mir-253-3p	miRNA	0.283451	0.999981
mir-255-3p	miRNA	0.110622	0.999981
mir-259-5p	miRNA	-0.0276475	0.999981
mir-2-5p	miRNA	0.0425638	0.999981
mir-262-3p	miRNA	-0.0558885	0.999981
mir-34-3p	miRNA	0.399781	0.999981
mir-34-5p	miRNA	0.358121	0.999981
mir-35-5p	miRNA	0.116573	0.999981
mir-356.2-3p	miRNA	-0.0293174	0.999981
mir-358-3p	miRNA	-0.0633163	0.999981
mir-359-3p	miRNA	-0.221024	0.999981
mir-36-3p	miRNA	-0.122111	0.999981
mir-38-3p	miRNA	0.102441	0.999981
mir-38-5p	miRNA	0.203403	0.999981
mir-39-3p	miRNA	-0.119691	0.999981
mir-39-5p	miRNA	0.113257	0.999981
mir-40-3p	miRNA	-0.0755846	0.999981
mir-41-3p	miRNA	0.207981	0.999981
mir-41-5p	miRNA	0.0973983	0.999981
mir-42-3p	miRNA	-0.232595	0.999981
mir-43-3p	miRNA	-0.0775353	0.999981
mir-44-3p	miRNA	-0.15004	0.999981
mir-45-3p	miRNA	-0.124617	0.999981
mir-45-5p	miRNA	0.221911	0.999981
mir-46-3p	miRNA	0.130493	0.999981
mir-46-5p	miRNA	-0.0758375	0.999981
mir-47-5p	miRNA	0.295827	0.999981
mir-4936-3p	miRNA	0.0447909	0.999981
mir-49-3p	miRNA	-0.196685	0.999981
mir-50-5p	miRNA	0.0513947	0.999981
mir-51-3p	miRNA	0.149075	0.999981
mir-51-5p	miRNA	0.0086235	0.999981
mir-52-5p	miRNA	0.154948	0.999981
mir-53-5p	miRNA	0.0830835	0.999981
mir-54-3p	miRNA	-0.115568	0.999981
mir-54-5p	miRNA	-0.0112916	0.999981
mir-55-3p	miRNA	0.0177327	0.999981
mir-56-3p	miRNA	0.0183121	0.999981
mir-56-5p	miRNA	0.312106	0.999981
mir-57-5p	miRNA	-0.233494	0.999981
mir-59-3p	miRNA	-0.295968	0.999981
mir-61-3p	miRNA	-0.0819358	0.999981
mir-61-5p	miRNA	-0.152032	0.999981
mir-62-3p	miRNA	-0.38639	0.999981
mir-66-3p	miRNA	-0.055225	0.999981
mir-67-3p	miRNA	-0.064488	0.999981
mir-72-3p	miRNA	0.180881	0.999981
mir-73-3p	miRNA	-0.0332319	0.999981
mir-74-3p	miRNA	0.126854	0.999981
mir-784-5p	miRNA	-0.199934	0.999981
mir-785-3p	miRNA	-0.088724	0.999981
mir-787-3p	miRNA	-0.00391791	0.999981
mir-790-5p	miRNA	-0.667093	0.999981
mir-793-3p	miRNA	-0.283252	0.999981
mir-79-3p	miRNA	0.0982023	0.999981
mir-795-5p	miRNA	-0.315374	0.999981
mir-79-5p	miRNA	0.24106	0.999981
mir-797-5p	miRNA	-0.530214	0.999981
mir-798-3p	miRNA	-0.0453378	0.999981
mir-80-3p	miRNA	0.24621	0.999981
mir-81-3p	miRNA	0.117909	0.999981
mir-81-5p	miRNA	0.48494	0.999981
mir-8191-5p	miRNA	-0.157773	0.999981
mir-8196.2-3p	miRNA	-0.933697	0.999981
mir-84-3p	miRNA	0.111188	0.999981
mir-85-3p	miRNA	-0.233458	0.999981
mir-86-5p	miRNA	-0.280947	0.999981
mir-87-3p	miRNA	0.106701	0.999981
mir-90-5p	miRNA	-0.356467	0.999981
F39B1.3-5p	miRNA	0	1
let-7-3p	miRNA	0.327752	1
lin-4-3p	miRNA	0.199317	1
lin-58-3p	miRNA	-0.00455074	1
lsy-6-5p	miRNA	0	1
mir-1018-3p	miRNA	-0.960318	1
mir-1019-3p	miRNA	0	1
mir-1019-5p	miRNA	-0.00674627	1
mir-1020-5p	miRNA	-0.944615	1
mir-1021-5p	miRNA	0	1
mir-1022-3p	miRNA	0	1
mir-124-5p	miRNA	-0.770237	1
mir-1818-5p	miRNA	0	1
mir-1819-3p	miRNA	0.426884	1
mir-1819-5p	miRNA	1.82521	1
mir-1820-3p	miRNA	0.738916	1
mir-1821-3p	miRNA	-0.338357	1
mir-1821-5p	miRNA	0	1
mir-1822-5p	miRNA	1.85744	1
mir-1823-3p	miRNA	-0.684513	1
mir-1823-5p	miRNA	0	1
mir-1824-3p	miRNA	0	1
mir-1824-5p	miRNA	-0.389515	1
mir-1828-3p	miRNA	-0.745023	1
mir-1829.2-3p	miRNA	0.887064	1
mir-1829.3-3p	miRNA	0.0975663	1
mir-1830-3p	miRNA	2.90621	1
mir-1830-5p	miRNA	4.25806	1
mir-1832.1-3p	miRNA	0	1
mir-1832.1-5p	miRNA	0	1
mir-1832.2-3p	miRNA	0	1
mir-1832.2-5p	miRNA	0	1
mir-1833-3p	miRNA	0	1
mir-2207-3p	miRNA	0	1
mir-2207-5p	miRNA	0	1
mir-2208.1-3p	miRNA	0	1
mir-2208.1-5p	miRNA	-0.725857	1
mir-2208.2-3p	miRNA	0.178625	1
mir-2208.2-5p	miRNA	0.677187	1
mir-2209.1-3p	miRNA	-0.379928	1
mir-2209.1-5p	miRNA	0	1
mir-2209.2-3p	miRNA	0	1
mir-2209.2-5p	miRNA	0	1
mir-2209.3-3p	miRNA	-1.28125	1
mir-2209.3-5p	miRNA	0	1
mir-2210-3p	miRNA	3.64373	1
mir-2210-5p	miRNA	2.60612	1
mir-2211-3p	miRNA	0	1
mir-2211-5p	miRNA	0	1
mir-2212-3p	miRNA	0	1
mir-2212-5p	miRNA	-1.05252	1
mir-2213-3p	miRNA	0	1
mir-2213-5p	miRNA	0	1
mir-2214-3p	miRNA	0.637467	1
mir-2215-3p	miRNA	0	1
mir-2215-5p	miRNA	0	1
mir-2216-3p	miRNA	-1.26921	1
mir-2216-5p	miRNA	0	1
mir-2217.1-3p	miRNA	-0.348884	1
mir-2217.1-5p	miRNA	0	1
mir-2217.2-3p	miRNA	-1.32866	1
mir-2217.2-5p	miRNA	0	1
mir-2217.3-3p	miRNA	0.0725781	1
mir-2217.3-5p	miRNA	0	1
mir-2217.4-3p	miRNA	0.159187	1
mir-2217.4-5p	miRNA	0	1
mir-2217.5-3p	miRNA	-1.67508	1
mir-2217.5-5p	miRNA	0	1
mir-2218.1-3p	miRNA	0	1
mir-2218.1-5p	miRNA	0	1
mir-2218.2-3p	miRNA	-0.684513	1
mir-2218.2-5p	miRNA	0	1
mir-2219-3p	miRNA	0	1
mir-2219-5p	miRNA	-0.745023	1
mir-2220-3p	miRNA	1.62309	1
mir-2220-5p	miRNA	0	1
mir-2221-3p	miRNA	-0.181585	1
mir-228-3p	miRNA	0.803566	1
mir-229-3p	miRNA	1.38086	1
mir-231-5p	miRNA	0.503599	1
mir-232-5p	miRNA	0.854927	1
mir-233-5p	miRNA	-1.10563	1
mir-234-5p	miRNA	-1.0764	1
mir-237-3p	miRNA	0.230113	1
mir-239.2-3p	miRNA	1.02975	1
mir-239.2-5p	miRNA	0.812616	1
mir-243-3p	miRNA	2.37997	1
mir-243-5p	miRNA	2.64411	1
mir-244-3p	miRNA	0.840499	1
mir-245-5p	miRNA	-1.10563	1
mir-247-3p	miRNA	-0.473155	1
mir-247-5p	miRNA	-0.804657	1
mir-249-3p	miRNA	-1.11944	1
mir-249-5p	miRNA	0	1
mir-251-5p	miRNA	0.00228852	1
mir-252-3p	miRNA	0	1
mir-253-5p	miRNA	0.151437	1
mir-254-3p	miRNA	0	1
mir-254-5p	miRNA	1.79199	1
mir-255-5p	miRNA	0.891189	1
mir-256-3p	miRNA	0	1
mir-257-5p	miRNA	-0.082624	1
mir-258.1-5p	miRNA	0	1
mir-258.2-5p	miRNA	0	1
mir-259-3p	miRNA	0.145501	1
mir-260-3p	miRNA	-0.34914	1
mir-261-3p	miRNA	0	1
mir-264-3p	miRNA	0	1
mir-265-3p	miRNA	0	1
mir-266-5p	miRNA	0	1
mir-267-5p	miRNA	0	1
mir-268-5p	miRNA	0	1
mir-269-5p	miRNA	0	1
mir-270-3p	miRNA	0	1
mir-271-5p	miRNA	0	1
mir-272-3p	miRNA	0	1
mir-273-3p	miRNA	0	1
mir-2953-3p	miRNA	0	1
mir-2953-5p	miRNA	0.170539	1
mir-353-5p	miRNA	0	1
mir-354-3p	miRNA	0	1
mir-355-3p	miRNA	1.82521	1
mir-356.1-5p	miRNA	0	1
mir-356.2-5p	miRNA	0.198479	1
mir-357-5p	miRNA	0	1
mir-358-5p	miRNA	-0.302403	1
mir-360-3p	miRNA	0	1
mir-360-5p	miRNA	0.308223	1
mir-36-5p	miRNA	0.217965	1
mir-37-5p	miRNA	-0.0225816	1
mir-392-3p	miRNA	1.57095	1
mir-392-5p	miRNA	0	1
mir-40-5p	miRNA	-0.561317	1
mir-42-5p	miRNA	0.354095	1
mir-43-5p	miRNA	0.563503	1
mir-44-5p	miRNA	-0.163053	1
mir-4805-3p	miRNA	0	1
mir-4805-5p	miRNA	0	1
mir-4806-3p	miRNA	0	1
mir-4806-5p	miRNA	-0.745023	1
mir-4807-3p	miRNA	-0.324809	1
mir-4808-3p	miRNA	0.417129	1
mir-4808-5p	miRNA	0	1
mir-4809-3p	miRNA	-0.684513	1
mir-4809-5p	miRNA	0	1
mir-4810.1-3p	miRNA	-0.684513	1
mir-4810.2-3p	miRNA	0.0162374	1
mir-4810.2-5p	miRNA	0	1
mir-4811-3p	miRNA	0.495355	1
mir-4811-5p	miRNA	0.317268	1
mir-4812-3p	miRNA	-0.555933	1
mir-4812-5p	miRNA	-0.139814	1
mir-4813-3p	miRNA	-0.176919	1
mir-4813-5p	miRNA	-0.575666	1
mir-4814-3p	miRNA	0.178625	1
mir-4814-5p	miRNA	1.24598	1
mir-4815-3p	miRNA	0	1
mir-4916-5p	miRNA	-0.473168	1
mir-4920-5p	miRNA	-1.93308	1
mir-4921-3p	miRNA	0	1
mir-4922.1-3p	miRNA	-1.81678	1
mir-4922.2-3p	miRNA	-1.1171	1
mir-4923.1-3p	miRNA	0	1
mir-4923.2-3p	miRNA	-0.684513	1
mir-4924-5p	miRNA	0	1
mir-4925-3p	miRNA	0.512634	1
mir-4926-5p	miRNA	-1.13569	1
mir-4927-5p	miRNA	0	1
mir-4929-3p	miRNA	-0.684513	1
mir-4930-5p	miRNA	0	1
mir-4931-3p	miRNA	0	1
mir-4932-5p	miRNA	0	1
mir-4933-5p	miRNA	0	1
mir-4934-3p	miRNA	0	1
mir-4935-5p	miRNA	0	1
mir-4937-5p	miRNA	-0.360823	1
mir-4938-5p	miRNA	0	1
mir-49-5p	miRNA	-0.0640348	1
mir-50-3p	miRNA	0.872903	1
mir-52-3p	miRNA	0.23692	1
mir-53-3p	miRNA	1.75569	1
mir-5545-3p	miRNA	0	1
mir-5545-5p	miRNA	0	1
mir-5546-3p	miRNA	0	1
mir-5546-5p	miRNA	0	1
mir-5547-3p	miRNA	0	1
mir-5547-5p	miRNA	0	1
mir-5548-3p	miRNA	0	1
mir-5548-5p	miRNA	0	1
mir-5549-3p	miRNA	1.24629	1
mir-5549-5p	miRNA	0	1
mir-5550-3p	miRNA	0	1
mir-5550-5p	miRNA	0	1
mir-5551-3p	miRNA	0	1
mir-5551-5p	miRNA	1.15568	1
mir-5552-3p	miRNA	0	1
mir-5552-5p	miRNA	0	1
mir-5553-3p	miRNA	0	1
mir-5553-5p	miRNA	0	1
mir-55-5p	miRNA	0.548249	1
mir-5592.1-5p	miRNA	-0.0113126	1
mir-5592.2-5p	miRNA	1.0535	1
mir-5593.1-3p	miRNA	0	1
mir-5593.1-5p	miRNA	0	1
mir-5593.2-3p	miRNA	0	1
mir-5593.2-5p	miRNA	0	1
mir-5594-3p	miRNA	1.78223	1
mir-5594-5p	miRNA	0	1
mir-5595-3p	miRNA	0	1
mir-5595-5p	miRNA	1.4254	1
mir-57-3p	miRNA	-0.431636	1
mir-58.2-3p	miRNA	2.31465	1
mir-58.2-5p	miRNA	-0.504698	1
miR58Synth	miRNA	0	1
mir-59-5p	miRNA	0.402545	1
mir-60-5p	miRNA	0.986889	1
mir-64-3p	miRNA	1.04554	1
mir-65-3p	miRNA	0.454181	1
mir-67-5p	miRNA	-0.888565	1
mir-73-5p	miRNA	0.582717	1
mir-74-5p	miRNA	-0.654412	1
mir-76-5p	miRNA	-0.661018	1
mir-78-3p	miRNA	-0.0385408	1
mir-784-3p	miRNA	-0.674679	1
mir-785-5p	miRNA	-0.684513	1
mir-786-5p	miRNA	-0.597882	1
mir-787-5p	miRNA	0	1
mir-788-3p	miRNA	0.39705	1
mir-788-5p	miRNA	2.83629	1
mir-789.1-3p	miRNA	0.631374	1
mir-789.1-5p	miRNA	1.2822	1
mir-789.2-3p	miRNA	1.15732	1
mir-789.2-5p	miRNA	2.79372	1
mir-790-3p	miRNA	-0.516485	1
mir-791-3p	miRNA	-2.07936	1
mir-791-5p	miRNA	-1.20993	1
mir-792-3p	miRNA	-0.427589	1
mir-792-5p	miRNA	2.43988	1
mir-794-3p	miRNA	0.392225	1
mir-794-5p	miRNA	0.137568	1
mir-795-3p	miRNA	0.127518	1
mir-796-5p	miRNA	0.333934	1
mir-797-3p	miRNA	-1.92997	1
mir-800-3p	miRNA	1.24875	1
mir-800-5p	miRNA	1.37076	1
mir-8186.1-3p	miRNA	0	1
mir-8186.1-5p	miRNA	0	1
mir-8186.2-3p	miRNA	0	1
mir-8186.2-5p	miRNA	0	1
mir-8187-3p	miRNA	0	1
mir-8187-5p	miRNA	0	1
mir-8188-3p	miRNA	0	1
mir-8188-5p	miRNA	0	1
mir-8189-3p	miRNA	0	1
mir-8189-5p	miRNA	-0.684513	1
mir-8190-3p	miRNA	0.00410466	1
mir-8190-5p	miRNA	0	1
mir-8191-3p	miRNA	0	1
mir-8192-3p	miRNA	1.09331	1
mir-8192-5p	miRNA	-0.725857	1
mir-8193-3p	miRNA	2.21258	1
mir-8193-5p	miRNA	0	1
mir-8194-3p	miRNA	0	1
mir-8194-5p	miRNA	0	1
mir-8195-3p	miRNA	-1.1901	1
mir-8195-5p	miRNA	0	1
mir-8196.1-5p	miRNA	-0.684513	1
mir-8196.2-5p	miRNA	0	1
mir-8197-3p	miRNA	0	1
mir-8197-5p	miRNA	0	1
mir-8198-5p	miRNA	0.163704	1
mir-8200-3p	miRNA	0	1
mir-8200-5p	miRNA	0	1
mir-8201-3p	miRNA	1.23999	1
mir-8201-5p	miRNA	1.4254	1
mir-8202-3p	miRNA	0	1
mir-8203-3p	miRNA	0	1
mir-8203-5p	miRNA	0	1
mir-8204-3p	miRNA	0	1
mir-8204-5p	miRNA	-0.745023	1
mir-8205-3p	miRNA	0	1
mir-8205-5p	miRNA	0	1
mir-8206-3p	miRNA	0.479095	1
mir-8206-5p	miRNA	-2.21989	1
mir-8207-3p	miRNA	-0.684513	1
mir-8207-5p	miRNA	0	1
mir-8208-3p	miRNA	-0.725857	1
mir-8208-5p	miRNA	-0.684513	1
mir-8209-3p	miRNA	1.04554	1
mir-8209-5p	miRNA	0	1
mir-8210-3p	miRNA	1.82521	1
mir-8210-5p	miRNA	1.40127	1
mir-8211-3p	miRNA	-1.4954	1
mir-8211-5p	miRNA	0	1
mir-8212-3p	miRNA	0	1
mir-8212-5p	miRNA	0	1
mir-82-5p	miRNA	0.768846	1
mir-85-5p	miRNA	-0.978996	1
mir-86-3p	miRNA	0.206918	1
mir-87-5p	miRNA	1.79056	1
21ur-11087	piRNA	0.761834	0.003525
21ur-3743	piRNA	0.761834	0.003525
21ur-2809	piRNA	0.720759	0.365355
21ur-3976	piRNA	0.626094	0.395181
21ur-1417	piRNA	0.871539	0.440964
21ur-8636	piRNA	-0.773512	0.529691
21ur-3131	piRNA	0.662146	0.674499
21ur-5864	piRNA	1.16921	0.674499
21ur-6426	piRNA	-0.789688	0.945023
21ur-100	piRNA	0.0616002	0.999981
21ur-10003	piRNA	0.0049204	0.999981
21ur-1001	piRNA	-0.154983	0.999981
21ur-10012	piRNA	0.277766	0.999981
21ur-1002	piRNA	-0.19311	0.999981
21ur-10020	piRNA	-0.0717001	0.999981
21ur-10033	piRNA	0.162922	0.999981
21ur-10043	piRNA	-0.188795	0.999981
21ur-10045	piRNA	-0.0738567	0.999981
21ur-10049	piRNA	-0.0501321	0.999981
21ur-1005	piRNA	0.109571	0.999981
21ur-10062	piRNA	0.0215337	0.999981
21ur-10068	piRNA	-0.314643	0.999981
21ur-10074	piRNA	0.0603037	0.999981
21ur-10075	piRNA	0.0855537	0.999981
21ur-1008	piRNA	0.177332	0.999981
21ur-10099	piRNA	-0.0730071	0.999981
21ur-1010	piRNA	0.0698065	0.999981
21ur-10112	piRNA	0.0833488	0.999981
21ur-1012	piRNA	0.136259	0.999981
21ur-1013	piRNA	0.447933	0.999981
21ur-1014	piRNA	-0.309621	0.999981
21ur-10142	piRNA	-0.247544	0.999981
21ur-10147	piRNA	0.0969469	0.999981
21ur-10154	piRNA	-0.228351	0.999981
21ur-1016	piRNA	-0.0501321	0.999981
21ur-1017	piRNA	-0.0306545	0.999981
21ur-1018	piRNA	0.0606619	0.999981
21ur-10180	piRNA	-0.195345	0.999981
21ur-10190	piRNA	-0.0541492	0.999981
21ur-10193	piRNA	-0.128362	0.999981
21ur-10199	piRNA	0.0276945	0.999981
21ur-102	piRNA	-0.175157	0.999981
21ur-10207	piRNA	0.193361	0.999981
21ur-1021	piRNA	0.0596431	0.999981
21ur-1022	piRNA	-0.0336393	0.999981
21ur-10226	piRNA	-0.0527981	0.999981
21ur-1023	piRNA	-0.397416	0.999981
21ur-10232	piRNA	0.000915377	0.999981
21ur-10233	piRNA	-0.0630426	0.999981
21ur-10239	piRNA	-0.17702	0.999981
21ur-10241	piRNA	-0.13432	0.999981
21ur-10247	piRNA	0.00521676	0.999981
21ur-1025	piRNA	-0.0630426	0.999981
21ur-10252	piRNA	-0.0692207	0.999981
21ur-10254	piRNA	0.00518322	0.999981
21ur-10265	piRNA	0.123646	0.999981
21ur-10268	piRNA	0.0175427	0.999981
21ur-1027	piRNA	-0.30158	0.999981
21ur-10274	piRNA	-0.029366	0.999981
21ur-10275	piRNA	0.237934	0.999981
21ur-10281	piRNA	0.132561	0.999981
21ur-10284	piRNA	-0.0469443	0.999981
21ur-10285	piRNA	-0.11282	0.999981
21ur-10293	piRNA	0.382588	0.999981
21ur-103	piRNA	0.276447	0.999981
21ur-10308	piRNA	0.0835632	0.999981
21ur-10312	piRNA	0.64497	0.999981
21ur-10317	piRNA	0.053824	0.999981
21ur-10318	piRNA	0.294271	0.999981
21ur-10319	piRNA	0.111417	0.999981
21ur-10324	piRNA	-0.0959789	0.999981
21ur-10334	piRNA	0.0313607	0.999981
21ur-10348	piRNA	-0.23655	0.999981
21ur-10351	piRNA	-0.0330988	0.999981
21ur-1036	piRNA	0.11516	0.999981
21ur-10370	piRNA	-0.203392	0.999981
21ur-10373	piRNA	0.124644	0.999981
21ur-10374	piRNA	-0.00871283	0.999981
21ur-10381	piRNA	-0.213455	0.999981
21ur-10383	piRNA	-0.512162	0.999981
21ur-104	piRNA	-0.00240818	0.999981
21ur-10403	piRNA	0.0245474	0.999981
21ur-10411	piRNA	0.00586929	0.999981
21ur-10416	piRNA	-0.175326	0.999981
21ur-10425	piRNA	-0.0155095	0.999981
21ur-10431	piRNA	-0.054545	0.999981
21ur-10441	piRNA	-0.0498619	0.999981
21ur-10453	piRNA	0.265005	0.999981
21ur-10473	piRNA	-0.2198	0.999981
21ur-1049	piRNA	0.166279	0.999981
21ur-10492	piRNA	-0.097305	0.999981
21ur-105	piRNA	0.091716	0.999981
21ur-1050	piRNA	-0.0219694	0.999981
21ur-10502	piRNA	0.132328	0.999981
21ur-10504	piRNA	0.31813	0.999981
21ur-10505	piRNA	-0.00230517	0.999981
21ur-10508	piRNA	-0.0679253	0.999981
21ur-1051	piRNA	-0.0961766	0.999981
21ur-10513	piRNA	0.101169	0.999981
21ur-10523	piRNA	0.12904	0.999981
21ur-1053	piRNA	-0.136683	0.999981
21ur-10532	piRNA	0.204998	0.999981
21ur-10534	piRNA	-0.0566895	0.999981
21ur-10541	piRNA	0.102163	0.999981
21ur-10543	piRNA	0.137641	0.999981
21ur-10548	piRNA	-0.0634341	0.999981
21ur-1055	piRNA	0.534892	0.999981
21ur-10551	piRNA	0.0118716	0.999981
21ur-10556	piRNA	0.197547	0.999981
21ur-1056	piRNA	-0.366655	0.999981
21ur-10560	piRNA	0.0335144	0.999981
21ur-1057	piRNA	0.0251234	0.999981
21ur-10584	piRNA	-0.22557	0.999981
21ur-1059	piRNA	-0.106627	0.999981
21ur-10592	piRNA	-0.260234	0.999981
21ur-10595	piRNA	0.144219	0.999981
21ur-10604	piRNA	-0.00427964	0.999981
21ur-10607	piRNA	0.1594	0.999981
21ur-1061	piRNA	0.0129384	0.999981
21ur-10616	piRNA	-0.28804	0.999981
21ur-10617	piRNA	0.0560788	0.999981
21ur-10618	piRNA	-0.0194389	0.999981
21ur-1063	piRNA	-0.202848	0.999981
21ur-10640	piRNA	-0.0390184	0.999981
21ur-10642	piRNA	-0.164403	0.999981
21ur-10643	piRNA	-0.091286	0.999981
21ur-10644	piRNA	0.132651	0.999981
21ur-10647	piRNA	-0.10669	0.999981
21ur-1065	piRNA	-0.328965	0.999981
21ur-10661	piRNA	0.00923932	0.999981
21ur-10675	piRNA	-0.00749835	0.999981
21ur-10678	piRNA	0.166805	0.999981
21ur-10681	piRNA	-0.321421	0.999981
21ur-1069	piRNA	0.30452	0.999981
21ur-10692	piRNA	0.00397434	0.999981
21ur-107	piRNA	0.132065	0.999981
21ur-10714	piRNA	-0.107448	0.999981
21ur-10716	piRNA	-0.161562	0.999981
21ur-1072	piRNA	-0.258885	0.999981
21ur-10721	piRNA	-0.135897	0.999981
21ur-1074	piRNA	-0.0921221	0.999981
21ur-10749	piRNA	-0.00760941	0.999981
21ur-1077	piRNA	-0.15856	0.999981
21ur-1078	piRNA	-0.0203845	0.999981
21ur-10780	piRNA	-0.0208285	0.999981
21ur-1079	piRNA	-0.265531	0.999981
21ur-10791	piRNA	-0.0807428	0.999981
21ur-10795	piRNA	0.220446	0.999981
21ur-108	piRNA	-0.328156	0.999981
21ur-10800	piRNA	0.0313607	0.999981
21ur-10807	piRNA	0.0520287	0.999981
21ur-10819	piRNA	-0.315887	0.999981
21ur-10832	piRNA	0.0697575	0.999981
21ur-10835	piRNA	-0.129353	0.999981
21ur-10836	piRNA	-0.633105	0.999981
21ur-10846	piRNA	0.0677845	0.999981
21ur-10859	piRNA	0.013562	0.999981
21ur-10860	piRNA	0.0749781	0.999981
21ur-10868	piRNA	0.0635855	0.999981
21ur-1087	piRNA	0.0879391	0.999981
21ur-10870	piRNA	0.27449	0.999981
21ur-1088	piRNA	0.10687	0.999981
21ur-10881	piRNA	-0.0282172	0.999981
21ur-10888	piRNA	0.133367	0.999981
21ur-1089	piRNA	-0.153896	0.999981
21ur-10893	piRNA	-0.138292	0.999981
21ur-10894	piRNA	0.251893	0.999981
21ur-10896	piRNA	0.0420199	0.999981
21ur-10899	piRNA	-0.372436	0.999981
21ur-1091	piRNA	0.226781	0.999981
21ur-10910	piRNA	0.0307505	0.999981
21ur-10913	piRNA	0.171163	0.999981
21ur-10922	piRNA	0.0945815	0.999981
21ur-10924	piRNA	-0.15178	0.999981
21ur-10926	piRNA	0.127522	0.999981
21ur-10934	piRNA	-0.142121	0.999981
21ur-10937	piRNA	0.169363	0.999981
21ur-10944	piRNA	0.135439	0.999981
21ur-1095	piRNA	-0.203029	0.999981
21ur-10951	piRNA	-0.0375931	0.999981
21ur-10954	piRNA	0.0609266	0.999981
21ur-10961	piRNA	-0.131397	0.999981
21ur-10963	piRNA	0.0667158	0.999981
21ur-10965	piRNA	0.586833	0.999981
21ur-10966	piRNA	0.0154001	0.999981
21ur-10969	piRNA	-0.146591	0.999981
21ur-10971	piRNA	-0.0136576	0.999981
21ur-10972	piRNA	-0.0314647	0.999981
21ur-10973	piRNA	0.083246	0.999981
21ur-10976	piRNA	-0.0546267	0.999981
21ur-10984	piRNA	-0.30792	0.999981
21ur-10995	piRNA	-0.00816017	0.999981
21ur-11000	piRNA	0.0122044	0.999981
21ur-11019	piRNA	-0.15324	0.999981
21ur-11022	piRNA	0.0484329	0.999981
21ur-11023	piRNA	0.245764	0.999981
21ur-11027	piRNA	-0.115965	0.999981
21ur-11029	piRNA	-0.133241	0.999981
21ur-11036	piRNA	0.0408976	0.999981
21ur-11040	piRNA	0.0423724	0.999981
21ur-11066	piRNA	0.0721375	0.999981
21ur-11075	piRNA	0.0216622	0.999981
21ur-1108	piRNA	-0.223288	0.999981
21ur-1109	piRNA	0.29911	0.999981
21ur-11093	piRNA	-0.139299	0.999981
21ur-11107	piRNA	0.0405015	0.999981
21ur-11119	piRNA	-0.215226	0.999981
21ur-1112	piRNA	0.0860239	0.999981
21ur-11122	piRNA	-0.0959789	0.999981
21ur-11139	piRNA	0.0264331	0.999981
21ur-11140	piRNA	-0.003971	0.999981
21ur-11148	piRNA	-0.0168203	0.999981
21ur-1115	piRNA	0.227852	0.999981
21ur-11150	piRNA	0.0980957	0.999981
21ur-11168	piRNA	-0.343737	0.999981
21ur-11169	piRNA	-0.0166709	0.999981
21ur-11183	piRNA	0.0133525	0.999981
21ur-11187	piRNA	0.215822	0.999981
21ur-11197	piRNA	0.290012	0.999981
21ur-112	piRNA	-0.686802	0.999981
21ur-1120	piRNA	-0.0874076	0.999981
21ur-11201	piRNA	0.0177756	0.999981
21ur-1121	piRNA	-0.0682604	0.999981
21ur-11211	piRNA	0.0485013	0.999981
21ur-1122	piRNA	-0.160526	0.999981
21ur-11224	piRNA	0.112619	0.999981
21ur-11225	piRNA	-0.0697206	0.999981
21ur-11226	piRNA	-0.00282304	0.999981
21ur-11227	piRNA	-0.598726	0.999981
21ur-1124	piRNA	-0.0363989	0.999981
21ur-11245	piRNA	0.154924	0.999981
21ur-11247	piRNA	-0.229752	0.999981
21ur-1126	piRNA	0.200673	0.999981
21ur-11278	piRNA	0.292959	0.999981
21ur-1129	piRNA	-0.152238	0.999981
21ur-1130	piRNA	0.0370099	0.999981
21ur-11301	piRNA	0.123327	0.999981
21ur-11306	piRNA	0.0451252	0.999981
21ur-11308	piRNA	-0.422868	0.999981
21ur-11314	piRNA	0.0919162	0.999981
21ur-11330	piRNA	-0.336009	0.999981
21ur-11333	piRNA	0.0391616	0.999981
21ur-1134	piRNA	-0.174638	0.999981
21ur-11340	piRNA	-0.350369	0.999981
21ur-1135	piRNA	-0.371392	0.999981
21ur-11350	piRNA	0.175145	0.999981
21ur-11354	piRNA	-0.181654	0.999981
21ur-1137	piRNA	0.104714	0.999981
21ur-11395	piRNA	-0.0388942	0.999981
21ur-11410	piRNA	-0.000525949	0.999981
21ur-11413	piRNA	-0.142754	0.999981
21ur-11415	piRNA	-0.0735249	0.999981
21ur-1142	piRNA	0.127013	0.999981
21ur-11424	piRNA	-0.029941	0.999981
21ur-1143	piRNA	-0.0177996	0.999981
21ur-1144	piRNA	-0.229752	0.999981
21ur-11444	piRNA	-0.136102	0.999981
21ur-11463	piRNA	0.153095	0.999981
21ur-1147	piRNA	-0.0827949	0.999981
21ur-1148	piRNA	0.0522582	0.999981
21ur-11482	piRNA	0.0835632	0.999981
21ur-11491	piRNA	0.1092	0.999981
21ur-11497	piRNA	0.152861	0.999981
21ur-1150	piRNA	0.135182	0.999981
21ur-11512	piRNA	-0.0296714	0.999981
21ur-1152	piRNA	0.21001	0.999981
21ur-11521	piRNA	-0.247716	0.999981
21ur-11533	piRNA	0.0954306	0.999981
21ur-1154	piRNA	-0.0904483	0.999981
21ur-1155	piRNA	0.0609266	0.999981
21ur-11555	piRNA	0.0754887	0.999981
21ur-11569	piRNA	-0.0725544	0.999981
21ur-11579	piRNA	-0.0125247	0.999981
21ur-1159	piRNA	-0.30154	0.999981
21ur-116	piRNA	-0.49024	0.999981
21ur-11601	piRNA	-0.0601001	0.999981
21ur-11614	piRNA	0.0673483	0.999981
21ur-11624	piRNA	0.121714	0.999981
21ur-11654	piRNA	-0.272702	0.999981
21ur-1166	piRNA	-0.244289	0.999981
21ur-11667	piRNA	0.0687699	0.999981
21ur-11676	piRNA	-0.0661261	0.999981
21ur-11685	piRNA	-0.0634341	0.999981
21ur-11695	piRNA	-0.0959116	0.999981
21ur-117	piRNA	0.327448	0.999981
21ur-1170	piRNA	-0.304588	0.999981
21ur-1171	piRNA	-0.0793667	0.999981
21ur-11712	piRNA	0.00745377	0.999981
21ur-11718	piRNA	0.0034471	0.999981
21ur-11721	piRNA	-0.069078	0.999981
21ur-11734	piRNA	-0.0909456	0.999981
21ur-1175	piRNA	-0.0589625	0.999981
21ur-11750	piRNA	-0.0905578	0.999981
21ur-11757	piRNA	-0.0796295	0.999981
21ur-1176	piRNA	0.247038	0.999981
21ur-11760	piRNA	0.030167	0.999981
21ur-11763	piRNA	0.27605	0.999981
21ur-11764	piRNA	-0.124133	0.999981
21ur-11766	piRNA	-0.11106	0.999981
21ur-1179	piRNA	-0.083428	0.999981
21ur-11790	piRNA	-0.200137	0.999981
21ur-11791	piRNA	0.172011	0.999981
21ur-11792	piRNA	0.0922986	0.999981
21ur-11793	piRNA	-0.0306545	0.999981
21ur-11797	piRNA	0.589174	0.999981
21ur-11802	piRNA	-0.123406	0.999981
21ur-11806	piRNA	0.27605	0.999981
21ur-11809	piRNA	-0.319665	0.999981
21ur-1181	piRNA	0.115113	0.999981
21ur-11813	piRNA	0.0353763	0.999981
21ur-1182	piRNA	0.243581	0.999981
21ur-11820	piRNA	-0.0526175	0.999981
21ur-11822	piRNA	0.339449	0.999981
21ur-11847	piRNA	-0.121716	0.999981
21ur-11850	piRNA	-0.238091	0.999981
21ur-11852	piRNA	0.385128	0.999981
21ur-1186	piRNA	0.0687699	0.999981
21ur-1187	piRNA	-0.0357638	0.999981
21ur-11870	piRNA	-0.0589601	0.999981
21ur-11875	piRNA	0.298147	0.999981
21ur-11880	piRNA	0.00108152	0.999981
21ur-11881	piRNA	-0.221767	0.999981
21ur-11883	piRNA	-0.0140018	0.999981
21ur-11885	piRNA	0.0207709	0.999981
21ur-11889	piRNA	-0.111272	0.999981
21ur-1189	piRNA	-0.00857021	0.999981
21ur-11899	piRNA	-0.0657745	0.999981
21ur-119	piRNA	0.0723705	0.999981
21ur-1190	piRNA	-0.245897	0.999981
21ur-11901	piRNA	0.0661897	0.999981
21ur-11914	piRNA	0.0753316	0.999981
21ur-11915	piRNA	-0.082382	0.999981
21ur-11919	piRNA	-0.276001	0.999981
21ur-1193	piRNA	-0.0914343	0.999981
21ur-11935	piRNA	0.14935	0.999981
21ur-1194	piRNA	-0.0128209	0.999981
21ur-11940	piRNA	-0.28804	0.999981
21ur-11946	piRNA	0.159743	0.999981
21ur-1195	piRNA	-0.462217	0.999981
21ur-11964	piRNA	-0.0390184	0.999981
21ur-11965	piRNA	-0.0657745	0.999981
21ur-11976	piRNA	-0.208418	0.999981
21ur-1198	piRNA	-0.0552223	0.999981
21ur-11980	piRNA	0.278491	0.999981
21ur-11986	piRNA	-0.279808	0.999981
21ur-11987	piRNA	0.044896	0.999981
21ur-11991	piRNA	0.153947	0.999981
21ur-11992	piRNA	-0.0653965	0.999981
21ur-11994	piRNA	0.0610294	0.999981
21ur-11998	piRNA	-0.22185	0.999981
21ur-11999	piRNA	0.0219321	0.999981
21ur-1200	piRNA	-0.184561	0.999981
21ur-12006	piRNA	0.255866	0.999981
21ur-12008	piRNA	-0.0365722	0.999981
21ur-12016	piRNA	-0.155877	0.999981
21ur-12019	piRNA	0.127013	0.999981
21ur-12024	piRNA	-0.12475	0.999981
21ur-12050	piRNA	-0.181709	0.999981
21ur-12052	piRNA	-0.0174535	0.999981
21ur-12054	piRNA	-0.0103842	0.999981
21ur-12055	piRNA	-0.261258	0.999981
21ur-12057	piRNA	-0.159105	0.999981
21ur-1206	piRNA	0.172837	0.999981
21ur-12061	piRNA	-0.109706	0.999981
21ur-12063	piRNA	0.0424218	0.999981
21ur-12082	piRNA	-0.224404	0.999981
21ur-1209	piRNA	0.350515	0.999981
21ur-121	piRNA	-0.0717001	0.999981
21ur-1211	piRNA	0.153245	0.999981
21ur-12113	piRNA	0.334673	0.999981
21ur-12117	piRNA	-0.278838	0.999981
21ur-12124	piRNA	-0.200294	0.999981
21ur-12127	piRNA	0.0560788	0.999981
21ur-12129	piRNA	0.196069	0.999981
21ur-1213	piRNA	0.0644658	0.999981
21ur-12130	piRNA	0.0773252	0.999981
21ur-12131	piRNA	0.362685	0.999981
21ur-12133	piRNA	0.236783	0.999981
21ur-12136	piRNA	0.0722835	0.999981
21ur-12138	piRNA	-0.179321	0.999981
21ur-12148	piRNA	0.163156	0.999981
21ur-1215	piRNA	-0.285071	0.999981
21ur-1216	piRNA	-0.025947	0.999981
21ur-1217	piRNA	-0.0567672	0.999981
21ur-12177	piRNA	0.0635855	0.999981
21ur-12179	piRNA	-0.0383678	0.999981
21ur-1218	piRNA	-0.251579	0.999981
21ur-12181	piRNA	-0.0704999	0.999981
21ur-1219	piRNA	-0.1564	0.999981
21ur-12196	piRNA	0.00301548	0.999981
21ur-122	piRNA	-0.145569	0.999981
21ur-1222	piRNA	-0.0716964	0.999981
21ur-12248	piRNA	-0.0120455	0.999981
21ur-12261	piRNA	0.0745762	0.999981
21ur-12274	piRNA	-0.256431	0.999981
21ur-12278	piRNA	-0.30158	0.999981
21ur-12288	piRNA	-0.13037	0.999981
21ur-1229	piRNA	0.116962	0.999981
21ur-12308	piRNA	0.0969469	0.999981
21ur-12316	piRNA	-0.212513	0.999981
21ur-12319	piRNA	-0.163882	0.999981
21ur-1232	piRNA	0.169515	0.999981
21ur-12324	piRNA	0.307876	0.999981
21ur-1233	piRNA	0.0562018	0.999981
21ur-12332	piRNA	-0.0293269	0.999981
21ur-12343	piRNA	-0.0692207	0.999981
21ur-12345	piRNA	-0.139374	0.999981
21ur-12349	piRNA	-0.0276277	0.999981
21ur-1235	piRNA	0.141205	0.999981
21ur-12351	piRNA	0.218385	0.999981
21ur-12363	piRNA	0.260565	0.999981
21ur-12371	piRNA	0.222417	0.999981
21ur-12377	piRNA	0.615042	0.999981
21ur-1238	piRNA	-0.172279	0.999981
21ur-12389	piRNA	0.0225163	0.999981
21ur-1239	piRNA	-0.0156663	0.999981
21ur-124	piRNA	0.251398	0.999981
21ur-12401	piRNA	-0.0501321	0.999981
21ur-1242	piRNA	-0.0498891	0.999981
21ur-1245	piRNA	-0.112101	0.999981
21ur-12451	piRNA	-0.18809	0.999981
21ur-12462	piRNA	-0.152566	0.999981
21ur-1247	piRNA	0.0723426	0.999981
21ur-12473	piRNA	-0.0848598	0.999981
21ur-12480	piRNA	0.184077	0.999981
21ur-12494	piRNA	-0.0266672	0.999981
21ur-125	piRNA	-0.0805329	0.999981
21ur-12505	piRNA	-0.529554	0.999981
21ur-12506	piRNA	-0.121483	0.999981
21ur-12509	piRNA	0.202403	0.999981
21ur-12510	piRNA	0.0771477	0.999981
21ur-12526	piRNA	0.101463	0.999981
21ur-12528	piRNA	-0.0247608	0.999981
21ur-1255	piRNA	0.160949	0.999981
21ur-12552	piRNA	0.0217381	0.999981
21ur-12560	piRNA	-0.205614	0.999981
21ur-12579	piRNA	-0.181709	0.999981
21ur-1258	piRNA	-0.149119	0.999981
21ur-1260	piRNA	-0.0315317	0.999981
21ur-12608	piRNA	0.0122509	0.999981
21ur-1261	piRNA	-0.129248	0.999981
21ur-12613	piRNA	0.0950722	0.999981
21ur-12631	piRNA	0.0456579	0.999981
21ur-1264	piRNA	-0.146203	0.999981
21ur-12649	piRNA	0.229521	0.999981
21ur-1265	piRNA	0.111012	0.999981
21ur-12669	piRNA	-0.142236	0.999981
21ur-1267	piRNA	0.0248309	0.999981
21ur-1269	piRNA	0.0937556	0.999981
21ur-12690	piRNA	-0.233692	0.999981
21ur-12693	piRNA	0.0592759	0.999981
21ur-12697	piRNA	-0.137875	0.999981
21ur-12716	piRNA	-0.125503	0.999981
21ur-1272	piRNA	0.0325716	0.999981
21ur-1273	piRNA	0.0421071	0.999981
21ur-1274	piRNA	0.260728	0.999981
21ur-12740	piRNA	0.0169812	0.999981
21ur-12743	piRNA	-0.0456342	0.999981
21ur-12748	piRNA	0.10533	0.999981
21ur-12749	piRNA	-0.071276	0.999981
21ur-12755	piRNA	-0.132964	0.999981
21ur-12758	piRNA	-0.207827	0.999981
21ur-12760	piRNA	0.0063002	0.999981
21ur-12766	piRNA	-0.196818	0.999981
21ur-1277	piRNA	-0.161562	0.999981
21ur-12777	piRNA	-0.265299	0.999981
21ur-1278	piRNA	0.119954	0.999981
21ur-12783	piRNA	0.101221	0.999981
21ur-12784	piRNA	0.153537	0.999981
21ur-1279	piRNA	-0.164094	0.999981
21ur-1280	piRNA	-0.304734	0.999981
21ur-12806	piRNA	-0.185532	0.999981
21ur-12808	piRNA	0.239844	0.999981
21ur-12813	piRNA	0.00347835	0.999981
21ur-12817	piRNA	-0.00969615	0.999981
21ur-12820	piRNA	-0.178986	0.999981
21ur-12822	piRNA	0.480869	0.999981
21ur-12838	piRNA	0.15568	0.999981
21ur-12839	piRNA	0.0878213	0.999981
21ur-12846	piRNA	0.10162	0.999981
21ur-12847	piRNA	0.0147719	0.999981
21ur-12852	piRNA	-0.19522	0.999981
21ur-12858	piRNA	-0.383425	0.999981
21ur-12884	piRNA	-0.109706	0.999981
21ur-12885	piRNA	0.177332	0.999981
21ur-12886	piRNA	0.132651	0.999981
21ur-12888	piRNA	-0.326193	0.999981
21ur-12891	piRNA	-0.134226	0.999981
21ur-12895	piRNA	0.15494	0.999981
21ur-1290	piRNA	-0.0350909	0.999981
21ur-12905	piRNA	-0.0441863	0.999981
21ur-12908	piRNA	0.0394282	0.999981
21ur-1291	piRNA	-0.0546267	0.999981
21ur-12910	piRNA	0.0905451	0.999981
21ur-12911	piRNA	-0.0776689	0.999981
21ur-12914	piRNA	-0.211115	0.999981
21ur-12919	piRNA	-0.0840858	0.999981
21ur-12930	piRNA	0.114425	0.999981
21ur-12931	piRNA	-0.192603	0.999981
21ur-12935	piRNA	-0.0841888	0.999981
21ur-12938	piRNA	0.070229	0.999981
21ur-12942	piRNA	0.0627969	0.999981
21ur-12954	piRNA	-0.299826	0.999981
21ur-1296	piRNA	0.131144	0.999981
21ur-12967	piRNA	-0.0168203	0.999981
21ur-12976	piRNA	-0.0634341	0.999981
21ur-130	piRNA	0.121605	0.999981
21ur-1300	piRNA	0.19033	0.999981
21ur-13005	piRNA	-0.0819747	0.999981
21ur-13009	piRNA	0.134452	0.999981
21ur-13010	piRNA	-0.142013	0.999981
21ur-13023	piRNA	-0.15003	0.999981
21ur-13029	piRNA	-0.0708259	0.999981
21ur-13030	piRNA	-0.211115	0.999981
21ur-13038	piRNA	-0.0401509	0.999981
21ur-13039	piRNA	0.0562018	0.999981
21ur-13043	piRNA	-0.0287425	0.999981
21ur-13049	piRNA	0.0999052	0.999981
21ur-13053	piRNA	-0.338006	0.999981
21ur-13055	piRNA	0.204423	0.999981
21ur-1306	piRNA	-0.142013	0.999981
21ur-13063	piRNA	-0.152566	0.999981
21ur-13064	piRNA	-0.039544	0.999981
21ur-13070	piRNA	-0.0527566	0.999981
21ur-13073	piRNA	-0.0208285	0.999981
21ur-13075	piRNA	-0.138204	0.999981
21ur-13076	piRNA	0.0335168	0.999981
21ur-13078	piRNA	-0.0961312	0.999981
21ur-13079	piRNA	-0.0170216	0.999981
21ur-13095	piRNA	-0.00211594	0.999981
21ur-13099	piRNA	0.0980932	0.999981
21ur-13102	piRNA	0.0313607	0.999981
21ur-13104	piRNA	-0.157151	0.999981
21ur-1311	piRNA	0.0283216	0.999981
21ur-13110	piRNA	0.0485843	0.999981
21ur-13112	piRNA	0.0947952	0.999981
21ur-13116	piRNA	0.0664347	0.999981
21ur-1312	piRNA	-0.182941	0.999981
21ur-13126	piRNA	-0.165937	0.999981
21ur-13127	piRNA	0.124571	0.999981
21ur-13133	piRNA	0.0920394	0.999981
21ur-1314	piRNA	-0.275106	0.999981
21ur-13140	piRNA	-0.64992	0.999981
21ur-1316	piRNA	-0.0883428	0.999981
21ur-1317	piRNA	0.307876	0.999981
21ur-13176	piRNA	-0.0405772	0.999981
21ur-13182	piRNA	0.116223	0.999981
21ur-13183	piRNA	-0.0174535	0.999981
21ur-13192	piRNA	-0.112101	0.999981
21ur-13209	piRNA	0.0524426	0.999981
21ur-13212	piRNA	-0.0951464	0.999981
21ur-13234	piRNA	-0.101226	0.999981
21ur-1324	piRNA	0.118901	0.999981
21ur-13246	piRNA	-0.111628	0.999981
21ur-13248	piRNA	-0.0853188	0.999981
21ur-1325	piRNA	-0.255426	0.999981
21ur-1326	piRNA	-0.153292	0.999981
21ur-13269	piRNA	-0.112185	0.999981
21ur-1327	piRNA	-0.168269	0.999981
21ur-13273	piRNA	0.111505	0.999981
21ur-13279	piRNA	-0.0716964	0.999981
21ur-13289	piRNA	0.0290502	0.999981
21ur-13309	piRNA	-0.0266355	0.999981
21ur-1331	piRNA	0.101665	0.999981
21ur-13311	piRNA	-0.156034	0.999981
21ur-1332	piRNA	-0.2198	0.999981
21ur-13322	piRNA	0.0457217	0.999981
21ur-13335	piRNA	-0.0566895	0.999981
21ur-13337	piRNA	0.0136857	0.999981
21ur-13339	piRNA	-0.0308974	0.999981
21ur-13340	piRNA	0.0355887	0.999981
21ur-13341	piRNA	0.321416	0.999981
21ur-1335	piRNA	-0.126635	0.999981
21ur-13361	piRNA	0.157007	0.999981
21ur-13363	piRNA	0.241603	0.999981
21ur-13367	piRNA	0.0879323	0.999981
21ur-13371	piRNA	-0.107982	0.999981
21ur-13388	piRNA	-0.0764968	0.999981
21ur-1339	piRNA	0.127966	0.999981
21ur-134	piRNA	0.236783	0.999981
21ur-13401	piRNA	-0.0839518	0.999981
21ur-13403	piRNA	-0.0288598	0.999981
21ur-13410	piRNA	-0.0296492	0.999981
21ur-13419	piRNA	-0.298463	0.999981
21ur-13420	piRNA	-0.621637	0.999981
21ur-1343	piRNA	-0.0900232	0.999981
21ur-13448	piRNA	-0.156895	0.999981
21ur-13463	piRNA	-0.0873821	0.999981
21ur-13464	piRNA	0.00521676	0.999981
21ur-13466	piRNA	0.10331	0.999981
21ur-1347	piRNA	0.174325	0.999981
21ur-13476	piRNA	-0.0174535	0.999981
21ur-13478	piRNA	-0.0692207	0.999981
21ur-13479	piRNA	0.121181	0.999981
21ur-13481	piRNA	-0.0347436	0.999981
21ur-13488	piRNA	-0.0921221	0.999981
21ur-13490	piRNA	-0.0152354	0.999981
21ur-13494	piRNA	-0.125503	0.999981
21ur-13497	piRNA	-0.0894317	0.999981
21ur-13501	piRNA	0.0423724	0.999981
21ur-13502	piRNA	0.00259606	0.999981
21ur-13538	piRNA	0.0885459	0.999981
21ur-13558	piRNA	-0.0624507	0.999981
21ur-1356	piRNA	-0.33462	0.999981
21ur-13573	piRNA	-0.0040316	0.999981
21ur-13591	piRNA	-0.191315	0.999981
21ur-13603	piRNA	-0.0959789	0.999981
21ur-13609	piRNA	-0.282937	0.999981
21ur-13610	piRNA	-0.0265299	0.999981
21ur-13621	piRNA	0.207966	0.999981
21ur-13623	piRNA	0.280021	0.999981
21ur-1363	piRNA	0.139122	0.999981
21ur-1365	piRNA	-0.15178	0.999981
21ur-1366	piRNA	0.0940547	0.999981
21ur-13668	piRNA	0.11502	0.999981
21ur-1367	piRNA	0.0687699	0.999981
21ur-13691	piRNA	-0.0314647	0.999981
21ur-137	piRNA	-0.106718	0.999981
21ur-1370	piRNA	-0.0457763	0.999981
21ur-13702	piRNA	-0.129593	0.999981
21ur-13712	piRNA	-0.071276	0.999981
21ur-13715	piRNA	-0.00906652	0.999981
21ur-13721	piRNA	0.117244	0.999981
21ur-13725	piRNA	-0.0630952	0.999981
21ur-13729	piRNA	-0.12475	0.999981
21ur-1373	piRNA	0.285044	0.999981
21ur-13730	piRNA	0.0478652	0.999981
21ur-13740	piRNA	-0.0974845	0.999981
21ur-1375	piRNA	0.280021	0.999981
21ur-13759	piRNA	0.0955878	0.999981
21ur-13761	piRNA	0.131273	0.999981
21ur-13763	piRNA	0.479444	0.999981
21ur-1377	piRNA	-0.0465118	0.999981
21ur-13773	piRNA	0.057015	0.999981
21ur-13776	piRNA	0.365798	0.999981
21ur-1378	piRNA	0.0309217	0.999981
21ur-13793	piRNA	0.131273	0.999981
21ur-13822	piRNA	-0.169589	0.999981
21ur-13823	piRNA	0.166805	0.999981
21ur-1383	piRNA	-0.232301	0.999981
21ur-1384	piRNA	0.0673483	0.999981
21ur-1385	piRNA	0.247038	0.999981
21ur-1388	piRNA	-0.130714	0.999981
21ur-13888	piRNA	-0.470961	0.999981
21ur-1389	piRNA	0.0354055	0.999981
21ur-13893	piRNA	0.00869574	0.999981
21ur-1391	piRNA	0.277569	0.999981
21ur-1392	piRNA	0.138346	0.999981
21ur-13923	piRNA	0.0507793	0.999981
21ur-13925	piRNA	-0.138693	0.999981
21ur-13928	piRNA	0.10162	0.999981
21ur-13938	piRNA	-0.0854485	0.999981
21ur-1394	piRNA	-0.139299	0.999981
21ur-13942	piRNA	0.100617	0.999981
21ur-13943	piRNA	-0.178986	0.999981
21ur-13960	piRNA	0.136259	0.999981
21ur-13967	piRNA	0.461498	0.999981
21ur-1398	piRNA	0.032163	0.999981
21ur-13984	piRNA	0.0126797	0.999981
21ur-13987	piRNA	-0.0588186	0.999981
21ur-1399	piRNA	0.153095	0.999981
21ur-14	piRNA	0.114578	0.999981
21ur-1400	piRNA	0.248407	0.999981
21ur-14008	piRNA	-0.163511	0.999981
21ur-1402	piRNA	-0.0832805	0.999981
21ur-14027	piRNA	-0.129248	0.999981
21ur-14033	piRNA	-0.0895249	0.999981
21ur-14034	piRNA	-0.212941	0.999981
21ur-14037	piRNA	0.126165	0.999981
21ur-1404	piRNA	0.00397434	0.999981
21ur-14040	piRNA	-0.129837	0.999981
21ur-14049	piRNA	-0.163149	0.999981
21ur-14096	piRNA	0.0746171	0.999981
21ur-14098	piRNA	0.245764	0.999981
21ur-14104	piRNA	0.124571	0.999981
21ur-14107	piRNA	-0.0911142	0.999981
21ur-14116	piRNA	-0.0894028	0.999981
21ur-14118	piRNA	0.144179	0.999981
21ur-1412	piRNA	-0.137875	0.999981
21ur-1413	piRNA	-0.224149	0.999981
21ur-14131	piRNA	-0.0994848	0.999981
21ur-14133	piRNA	-0.0996176	0.999981
21ur-14141	piRNA	-0.129353	0.999981
21ur-14143	piRNA	-0.4311	0.999981
21ur-14148	piRNA	-0.243867	0.999981
21ur-1415	piRNA	-0.0510289	0.999981
21ur-14156	piRNA	-0.426789	0.999981
21ur-14165	piRNA	-0.0848729	0.999981
21ur-14166	piRNA	0.0461642	0.999981
21ur-14182	piRNA	-0.130971	0.999981
21ur-14187	piRNA	0.11502	0.999981
21ur-1419	piRNA	-0.0464123	0.999981
21ur-1420	piRNA	0.0368346	0.999981
21ur-14215	piRNA	0.321044	0.999981
21ur-14219	piRNA	-0.181394	0.999981
21ur-14228	piRNA	-0.188613	0.999981
21ur-14240	piRNA	-0.179994	0.999981
21ur-14245	piRNA	-0.205757	0.999981
21ur-14246	piRNA	-0.237126	0.999981
21ur-14248	piRNA	0.182387	0.999981
21ur-14274	piRNA	0.091716	0.999981
21ur-14284	piRNA	-0.00928145	0.999981
21ur-14294	piRNA	-0.394098	0.999981
21ur-14299	piRNA	-0.0516662	0.999981
21ur-143	piRNA	-0.0178468	0.999981
21ur-1430	piRNA	-0.667093	0.999981
21ur-14306	piRNA	0.123621	0.999981
21ur-14329	piRNA	0.171735	0.999981
21ur-14334	piRNA	0.121235	0.999981
21ur-14339	piRNA	-0.155713	0.999981
21ur-14340	piRNA	-0.0919762	0.999981
21ur-14347	piRNA	-0.05887	0.999981
21ur-14352	piRNA	-0.0621267	0.999981
21ur-14356	piRNA	0.00521676	0.999981
21ur-1436	piRNA	0.00739587	0.999981
21ur-14366	piRNA	0.246774	0.999981
21ur-1437	piRNA	0.0424218	0.999981
21ur-14379	piRNA	-0.161609	0.999981
21ur-14395	piRNA	-0.228445	0.999981
21ur-14398	piRNA	-0.174192	0.999981
21ur-144	piRNA	-0.245316	0.999981
21ur-14409	piRNA	0.0635855	0.999981
21ur-14421	piRNA	-0.099216	0.999981
21ur-14424	piRNA	0.0622489	0.999981
21ur-1443	piRNA	-0.598726	0.999981
21ur-14440	piRNA	-0.0347436	0.999981
21ur-14442	piRNA	-0.0874076	0.999981
21ur-14445	piRNA	0.0334998	0.999981
21ur-1445	piRNA	-0.00277309	0.999981
21ur-14450	piRNA	0.14171	0.999981
21ur-14456	piRNA	0.0456579	0.999981
21ur-14467	piRNA	-0.00407779	0.999981
21ur-1447	piRNA	-0.178986	0.999981
21ur-14476	piRNA	-0.212513	0.999981
21ur-1448	piRNA	0.0610294	0.999981
21ur-14481	piRNA	-0.319593	0.999981
21ur-14482	piRNA	0.136714	0.999981
21ur-14483	piRNA	-0.130714	0.999981
21ur-14491	piRNA	0.122888	0.999981
21ur-14493	piRNA	-0.106378	0.999981
21ur-14495	piRNA	-0.292573	0.999981
21ur-14496	piRNA	-0.0217852	0.999981
21ur-1450	piRNA	-0.22534	0.999981
21ur-14506	piRNA	-0.191108	0.999981
21ur-14507	piRNA	0.0958321	0.999981
21ur-14509	piRNA	-0.232301	0.999981
21ur-14514	piRNA	0.0661897	0.999981
21ur-14522	piRNA	-0.00746909	0.999981
21ur-14523	piRNA	-0.0414709	0.999981
21ur-14528	piRNA	0.101221	0.999981
21ur-1453	piRNA	0.146356	0.999981
21ur-14535	piRNA	-0.412288	0.999981
21ur-14538	piRNA	0.0368346	0.999981
21ur-1454	piRNA	-0.104092	0.999981
21ur-14555	piRNA	0.0758908	0.999981
21ur-14556	piRNA	0.0307505	0.999981
21ur-14562	piRNA	-0.022833	0.999981
21ur-14565	piRNA	0.0201415	0.999981
21ur-14567	piRNA	-0.475302	0.999981
21ur-14571	piRNA	-0.139331	0.999981
21ur-14577	piRNA	-0.0510289	0.999981
21ur-1458	piRNA	0.0695355	0.999981
21ur-14581	piRNA	-0.152916	0.999981
21ur-14592	piRNA	-0.0606588	0.999981
21ur-14613	piRNA	-0.0125135	0.999981
21ur-14614	piRNA	-0.141413	0.999981
21ur-14616	piRNA	-0.34555	0.999981
21ur-14626	piRNA	-0.223982	0.999981
21ur-14631	piRNA	-0.126905	0.999981
21ur-1464	piRNA	-0.085893	0.999981
21ur-14654	piRNA	-0.00794737	0.999981
21ur-1466	piRNA	-0.100303	0.999981
21ur-1467	piRNA	-0.358524	0.999981
21ur-14674	piRNA	-0.0904483	0.999981
21ur-14691	piRNA	-0.151654	0.999981
21ur-14711	piRNA	-0.0260588	0.999981
21ur-14714	piRNA	-0.353801	0.999981
21ur-1472	piRNA	0.204998	0.999981
21ur-14727	piRNA	0.135882	0.999981
21ur-14728	piRNA	-0.0801549	0.999981
21ur-1473	piRNA	0.118379	0.999981
21ur-1474	piRNA	-0.16649	0.999981
21ur-14741	piRNA	-0.024853	0.999981
21ur-1476	piRNA	-0.0893329	0.999981
21ur-1477	piRNA	-0.203029	0.999981
21ur-14771	piRNA	-0.121483	0.999981
21ur-1483	piRNA	0.283619	0.999981
21ur-14840	piRNA	-0.219136	0.999981
21ur-1485	piRNA	0.177332	0.999981
21ur-14852	piRNA	0.356877	0.999981
21ur-1486	piRNA	-0.0729652	0.999981
21ur-14865	piRNA	-0.153022	0.999981
21ur-1487	piRNA	0.307967	0.999981
21ur-14876	piRNA	-0.174192	0.999981
21ur-14880	piRNA	-0.00439501	0.999981
21ur-14892	piRNA	-0.219394	0.999981
21ur-14895	piRNA	0.0767463	0.999981
21ur-1490	piRNA	-0.00265217	0.999981
21ur-14904	piRNA	-0.06036	0.999981
21ur-14907	piRNA	0.0478652	0.999981
21ur-1494	piRNA	-0.164094	0.999981
21ur-14962	piRNA	-0.0738567	0.999981
21ur-14963	piRNA	-0.0539988	0.999981
21ur-14966	piRNA	0.117244	0.999981
21ur-14967	piRNA	0.153537	0.999981
21ur-1497	piRNA	0.0316758	0.999981
21ur-1499	piRNA	-0.00438546	0.999981
21ur-14997	piRNA	-0.187995	0.999981
21ur-150	piRNA	-0.260539	0.999981
21ur-15018	piRNA	0.0355887	0.999981
21ur-15029	piRNA	-0.111053	0.999981
21ur-15039	piRNA	-0.0589625	0.999981
21ur-1504	piRNA	0.112112	0.999981
21ur-15043	piRNA	0.0217381	0.999981
21ur-15044	piRNA	0.0980932	0.999981
21ur-15045	piRNA	-0.236902	0.999981
21ur-1507	piRNA	0.0462985	0.999981
21ur-15077	piRNA	0.161135	0.999981
21ur-15083	piRNA	-0.219808	0.999981
21ur-15094	piRNA	-0.101939	0.999981
21ur-15096	piRNA	-0.00871283	0.999981
21ur-151	piRNA	-0.139331	0.999981
21ur-15100	piRNA	-0.258477	0.999981
21ur-1511	piRNA	0.167809	0.999981
21ur-15112	piRNA	0.283619	0.999981
21ur-15114	piRNA	-0.00906652	0.999981
21ur-15124	piRNA	-0.077614	0.999981
21ur-15128	piRNA	-0.145557	0.999981
21ur-15134	piRNA	0.158399	0.999981
21ur-1514	piRNA	0.158149	0.999981
21ur-15142	piRNA	-0.035868	0.999981
21ur-1515	piRNA	0.0958321	0.999981
21ur-1516	piRNA	-0.570756	0.999981
21ur-15166	piRNA	0.443637	0.999981
21ur-1517	piRNA	0.237934	0.999981
21ur-15175	piRNA	0.213334	0.999981
21ur-15186	piRNA	-0.0653965	0.999981
21ur-15191	piRNA	-0.298212	0.999981
21ur-15197	piRNA	-0.0686785	0.999981
21ur-15204	piRNA	0.0456579	0.999981
21ur-15205	piRNA	-0.181709	0.999981
21ur-15211	piRNA	-0.00277309	0.999981
21ur-15214	piRNA	-0.157738	0.999981
21ur-15217	piRNA	0.309786	0.999981
21ur-15221	piRNA	0.319394	0.999981
21ur-15223	piRNA	0.0335168	0.999981
21ur-15227	piRNA	-0.229374	0.999981
21ur-15241	piRNA	-0.28804	0.999981
21ur-15255	piRNA	0.0749149	0.999981
21ur-1526	piRNA	-0.0332489	0.999981
21ur-15289	piRNA	0.202327	0.999981
21ur-15296	piRNA	-0.00809817	0.999981
21ur-15299	piRNA	0.107349	0.999981
21ur-153	piRNA	-0.0326696	0.999981
21ur-15303	piRNA	-0.0844223	0.999981
21ur-15306	piRNA	0.0973191	0.999981
21ur-15307	piRNA	-0.146389	0.999981
21ur-15308	piRNA	-0.091286	0.999981
21ur-15311	piRNA	-0.104092	0.999981
21ur-15318	piRNA	-0.112125	0.999981
21ur-15334	piRNA	-0.0375931	0.999981
21ur-15349	piRNA	0.181793	0.999981
21ur-1535	piRNA	-0.240659	0.999981
21ur-15352	piRNA	0.105777	0.999981
21ur-15353	piRNA	-0.038994	0.999981
21ur-15361	piRNA	0.00739587	0.999981
21ur-15366	piRNA	-0.0128541	0.999981
21ur-15367	piRNA	-0.155442	0.999981
21ur-15368	piRNA	-0.146591	0.999981
21ur-15376	piRNA	-0.0704999	0.999981
21ur-15382	piRNA	-0.0200855	0.999981
21ur-1540	piRNA	-0.0876116	0.999981
21ur-15407	piRNA	0.0973191	0.999981
21ur-15409	piRNA	0.0951292	0.999981
21ur-15416	piRNA	-0.0236141	0.999981
21ur-15421	piRNA	0.0749149	0.999981
21ur-15434	piRNA	0.198462	0.999981
21ur-15439	piRNA	-0.110124	0.999981
21ur-1545	piRNA	-0.141514	0.999981
21ur-15452	piRNA	-0.0498891	0.999981
21ur-15453	piRNA	-0.115785	0.999981
21ur-15456	piRNA	-0.20919	0.999981
21ur-15459	piRNA	-0.0690875	0.999981
21ur-15468	piRNA	0.0983664	0.999981
21ur-1547	piRNA	-0.200294	0.999981
21ur-15504	piRNA	-0.107434	0.999981
21ur-15506	piRNA	0.217402	0.999981
21ur-1551	piRNA	-0.0824486	0.999981
21ur-1555	piRNA	-0.14244	0.999981
21ur-1557	piRNA	0.383054	0.999981
21ur-15571	piRNA	-0.106378	0.999981
21ur-15581	piRNA	0.0235211	0.999981
21ur-15584	piRNA	-0.137278	0.999981
21ur-1559	piRNA	-0.161609	0.999981
21ur-15598	piRNA	0.0129384	0.999981
21ur-156	piRNA	0.111706	0.999981
21ur-15604	piRNA	-0.134991	0.999981
21ur-15609	piRNA	-4.62403e-05	0.999981
21ur-15626	piRNA	0.0423724	0.999981
21ur-15633	piRNA	0.0800616	0.999981
21ur-15645	piRNA	-0.155938	0.999981
21ur-15646	piRNA	0.260565	0.999981
21ur-15656	piRNA	-0.101939	0.999981
21ur-15657	piRNA	-0.352666	0.999981
21ur-15658	piRNA	-0.161576	0.999981
21ur-1566	piRNA	0.15568	0.999981
21ur-15664	piRNA	-0.152238	0.999981
21ur-15667	piRNA	0.0449438	0.999981
21ur-15669	piRNA	-0.0200855	0.999981
21ur-15677	piRNA	-0.129009	0.999981
21ur-15678	piRNA	-0.0692943	0.999981
21ur-15682	piRNA	-0.00749835	0.999981
21ur-15695	piRNA	0.070286	0.999981
21ur-1575	piRNA	-0.12475	0.999981
21ur-1578	piRNA	-0.491699	0.999981
21ur-1579	piRNA	-0.140277	0.999981
21ur-1581	piRNA	-0.228402	0.999981
21ur-1588	piRNA	-0.063913	0.999981
21ur-1589	piRNA	-0.0126754	0.999981
21ur-1590	piRNA	-0.155713	0.999981
21ur-1595	piRNA	0.462918	0.999981
21ur-16	piRNA	0.0313607	0.999981
21ur-160	piRNA	-0.0730071	0.999981
21ur-1602	piRNA	-0.179867	0.999981
21ur-1604	piRNA	-0.0836448	0.999981
21ur-1607	piRNA	0.121235	0.999981
21ur-161	piRNA	-0.163882	0.999981
21ur-1612	piRNA	0.105728	0.999981
21ur-1615	piRNA	-0.284841	0.999981
21ur-1618	piRNA	-0.430344	0.999981
21ur-1623	piRNA	-0.0458885	0.999981
21ur-1624	piRNA	-0.179004	0.999981
21ur-1626	piRNA	0.259187	0.999981
21ur-163	piRNA	0.101169	0.999981
21ur-1632	piRNA	-0.0886825	0.999981
21ur-1633	piRNA	0.0227101	0.999981
21ur-164	piRNA	-0.300789	0.999981
21ur-1642	piRNA	-0.279382	0.999981
21ur-1651	piRNA	0.101221	0.999981
21ur-1658	piRNA	-0.0122775	0.999981
21ur-1659	piRNA	-0.0144295	0.999981
21ur-166	piRNA	-0.204913	0.999981
21ur-1660	piRNA	-0.191108	0.999981
21ur-167	piRNA	-0.00933541	0.999981
21ur-1676	piRNA	-0.00664405	0.999981
21ur-1678	piRNA	0.661387	0.999981
21ur-1681	piRNA	-0.55197	0.999981
21ur-1684	piRNA	-0.224404	0.999981
21ur-1686	piRNA	0.331216	0.999981
21ur-1687	piRNA	-0.00630482	0.999981
21ur-1688	piRNA	0.629899	0.999981
21ur-1689	piRNA	0.163924	0.999981
21ur-169	piRNA	-0.312176	0.999981
21ur-1693	piRNA	-0.0621267	0.999981
21ur-1694	piRNA	-0.0301694	0.999981
21ur-1695	piRNA	0.515289	0.999981
21ur-1697	piRNA	-0.0296492	0.999981
21ur-1698	piRNA	-0.0243589	0.999981
21ur-1703	piRNA	-0.143924	0.999981
21ur-1705	piRNA	-0.0199195	0.999981
21ur-1706	piRNA	0.171735	0.999981
21ur-1707	piRNA	0.0999447	0.999981
21ur-1708	piRNA	0.00301548	0.999981
21ur-1709	piRNA	-0.136627	0.999981
21ur-171	piRNA	-0.115696	0.999981
21ur-1710	piRNA	0.100617	0.999981
21ur-1713	piRNA	-0.0711356	0.999981
21ur-1714	piRNA	-0.14709	0.999981
21ur-1719	piRNA	0.116213	0.999981
21ur-172	piRNA	0.0249228	0.999981
21ur-1722	piRNA	0.00188644	0.999981
21ur-1725	piRNA	-0.083931	0.999981
21ur-1727	piRNA	-0.0194389	0.999981
21ur-1731	piRNA	0.0249228	0.999981
21ur-1739	piRNA	-0.0630952	0.999981
21ur-1740	piRNA	-0.194634	0.999981
21ur-1747	piRNA	0.210588	0.999981
21ur-1758	piRNA	-0.073345	0.999981
21ur-1762	piRNA	-0.0208285	0.999981
21ur-1764	piRNA	-0.265282	0.999981
21ur-1769	piRNA	-0.298861	0.999981
21ur-1770	piRNA	-0.116773	0.999981
21ur-1773	piRNA	0.325298	0.999981
21ur-1776	piRNA	0.0816845	0.999981
21ur-1780	piRNA	-0.251909	0.999981
21ur-1787	piRNA	0.0379234	0.999981
21ur-179	piRNA	-0.412288	0.999981
21ur-1790	piRNA	-0.474096	0.999981
21ur-1793	piRNA	3.10425e-05	0.999981
21ur-1794	piRNA	-0.0412563	0.999981
21ur-1797	piRNA	0.27449	0.999981
21ur-18	piRNA	-0.0734894	0.999981
21ur-180	piRNA	0.0501554	0.999981
21ur-1800	piRNA	0.0896937	0.999981
21ur-1801	piRNA	-0.0365722	0.999981
21ur-1802	piRNA	-0.326417	0.999981
21ur-1807	piRNA	0.128417	0.999981
21ur-1809	piRNA	0.0954306	0.999981
21ur-182	piRNA	-0.294952	0.999981
21ur-1821	piRNA	0.0250728	0.999981
21ur-1822	piRNA	-0.297515	0.999981
21ur-1825	piRNA	-0.0390184	0.999981
21ur-183	piRNA	0.0630865	0.999981
21ur-1831	piRNA	-0.0194389	0.999981
21ur-1832	piRNA	-0.0353014	0.999981
21ur-1833	piRNA	0.0619671	0.999981
21ur-1837	piRNA	0.103048	0.999981
21ur-1838	piRNA	0.0337708	0.999981
21ur-1839	piRNA	-0.13684	0.999981
21ur-1842	piRNA	0.0787807	0.999981
21ur-1846	piRNA	-0.196818	0.999981
21ur-1847	piRNA	-0.136449	0.999981
21ur-1848	piRNA	0.0964678	0.999981
21ur-1850	piRNA	-0.307427	0.999981
21ur-1852	piRNA	-0.534521	0.999981
21ur-1858	piRNA	-0.572876	0.999981
21ur-1860	piRNA	-0.0547399	0.999981
21ur-1861	piRNA	-0.0674381	0.999981
21ur-1862	piRNA	-0.206781	0.999981
21ur-1865	piRNA	0.0947952	0.999981
21ur-1868	piRNA	0.152636	0.999981
21ur-1869	piRNA	0.0860239	0.999981
21ur-1876	piRNA	-0.326988	0.999981
21ur-1878	piRNA	0.174452	0.999981
21ur-1882	piRNA	-0.219336	0.999981
21ur-1884	piRNA	-0.233088	0.999981
21ur-1886	piRNA	0.05792	0.999981
21ur-189	piRNA	0.136714	0.999981
21ur-1890	piRNA	-0.27318	0.999981
21ur-1893	piRNA	-0.253329	0.999981
21ur-1896	piRNA	-0.022833	0.999981
21ur-1898	piRNA	-0.234358	0.999981
21ur-1903	piRNA	0.131277	0.999981
21ur-1906	piRNA	-0.199339	0.999981
21ur-1909	piRNA	0.0210478	0.999981
21ur-191	piRNA	0.14171	0.999981
21ur-1910	piRNA	-0.0140407	0.999981
21ur-1912	piRNA	-0.256595	0.999981
21ur-1919	piRNA	-0.0641066	0.999981
21ur-192	piRNA	-0.0687771	0.999981
21ur-1924	piRNA	-0.0854485	0.999981
21ur-1929	piRNA	-0.150069	0.999981
21ur-1930	piRNA	0.0417226	0.999981
21ur-1932	piRNA	0.0582787	0.999981
21ur-1934	piRNA	-0.11106	0.999981
21ur-194	piRNA	-0.315887	0.999981
21ur-1943	piRNA	0.055287	0.999981
21ur-1944	piRNA	-0.071276	0.999981
21ur-1949	piRNA	-0.191955	0.999981
21ur-1950	piRNA	-0.136102	0.999981
21ur-1953	piRNA	-0.557069	0.999981
21ur-1955	piRNA	0.374712	0.999981
21ur-1956	piRNA	0.210588	0.999981
21ur-1960	piRNA	-0.176989	0.999981
21ur-1961	piRNA	0.0217381	0.999981
21ur-1967	piRNA	-0.580584	0.999981
21ur-1968	piRNA	-0.177195	0.999981
21ur-1969	piRNA	-0.0140018	0.999981
21ur-197	piRNA	0.266322	0.999981
21ur-1970	piRNA	-0.192557	0.999981
21ur-1972	piRNA	0.175145	0.999981
21ur-1975	piRNA	0.0745762	0.999981
21ur-1979	piRNA	0.226627	0.999981
21ur-1981	piRNA	-0.336786	0.999981
21ur-1983	piRNA	-0.0347436	0.999981
21ur-1988	piRNA	-0.0330654	0.999981
21ur-199	piRNA	-0.0722871	0.999981
21ur-2000	piRNA	0.0288292	0.999981
21ur-2005	piRNA	-0.0654543	0.999981
21ur-2006	piRNA	-0.124133	0.999981
21ur-2013	piRNA	0.124288	0.999981
21ur-2014	piRNA	-0.176245	0.999981
21ur-2015	piRNA	-0.0592715	0.999981
21ur-2021	piRNA	0.0090017	0.999981
21ur-2024	piRNA	-0.281872	0.999981
21ur-2026	piRNA	0.111505	0.999981
21ur-2028	piRNA	-0.247092	0.999981
21ur-2029	piRNA	-0.136627	0.999981
21ur-2030	piRNA	0.133739	0.999981
21ur-2032	piRNA	0.0666091	0.999981
21ur-2035	piRNA	0.513132	0.999981
21ur-2042	piRNA	-0.215159	0.999981
21ur-2043	piRNA	-0.00766604	0.999981
21ur-2047	piRNA	0.303652	0.999981
21ur-2049	piRNA	0.00221527	0.999981
21ur-205	piRNA	-0.171164	0.999981
21ur-2054	piRNA	-0.10832	0.999981
21ur-2055	piRNA	-0.100745	0.999981
21ur-2059	piRNA	-0.139317	0.999981
21ur-2061	piRNA	-0.196349	0.999981
21ur-2062	piRNA	0.157007	0.999981
21ur-2070	piRNA	-0.46275	0.999981
21ur-2071	piRNA	0.0868276	0.999981
21ur-2073	piRNA	-0.022177	0.999981
21ur-2077	piRNA	-0.115684	0.999981
21ur-2086	piRNA	-0.19829	0.999981
21ur-2089	piRNA	-0.249424	0.999981
21ur-209	piRNA	0.0159515	0.999981
21ur-2091	piRNA	0.0325384	0.999981
21ur-2099	piRNA	0.131123	0.999981
21ur-2100	piRNA	0.149201	0.999981
21ur-2101	piRNA	0.0310954	0.999981
21ur-2106	piRNA	-0.029366	0.999981
21ur-2108	piRNA	-0.00747124	0.999981
21ur-2109	piRNA	-0.383425	0.999981
21ur-2110	piRNA	0.142468	0.999981
21ur-2112	piRNA	-0.552832	0.999981
21ur-2114	piRNA	-0.516856	0.999981
21ur-2117	piRNA	-0.00940941	0.999981
21ur-2118	piRNA	-0.329101	0.999981
21ur-2123	piRNA	0.116223	0.999981
21ur-2127	piRNA	-0.215789	0.999981
21ur-2129	piRNA	-0.0177996	0.999981
21ur-213	piRNA	0.00136637	0.999981
21ur-2131	piRNA	0.286038	0.999981
21ur-2132	piRNA	0.0486538	0.999981
21ur-2133	piRNA	-0.438831	0.999981
21ur-2138	piRNA	-0.19161	0.999981
21ur-2139	piRNA	0.138204	0.999981
21ur-214	piRNA	-0.325293	0.999981
21ur-2147	piRNA	-0.160375	0.999981
21ur-2149	piRNA	-0.0822074	0.999981
21ur-215	piRNA	-0.0437452	0.999981
21ur-2151	piRNA	-0.42512	0.999981
21ur-2152	piRNA	-0.438061	0.999981
21ur-2155	piRNA	0.0725982	0.999981
21ur-2157	piRNA	0.046604	0.999981
21ur-216	piRNA	-0.134617	0.999981
21ur-2161	piRNA	-0.303915	0.999981
21ur-2165	piRNA	-0.207451	0.999981
21ur-217	piRNA	0.350515	0.999981
21ur-2170	piRNA	0.0229956	0.999981
21ur-2172	piRNA	-0.266078	0.999981
21ur-2173	piRNA	-0.0818839	0.999981
21ur-2177	piRNA	-0.114576	0.999981
21ur-2178	piRNA	-0.155371	0.999981
21ur-2179	piRNA	-0.0960213	0.999981
21ur-2180	piRNA	0.0163385	0.999981
21ur-2181	piRNA	0.204045	0.999981
21ur-2191	piRNA	0.0986443	0.999981
21ur-2192	piRNA	0.0323036	0.999981
21ur-2193	piRNA	0.430569	0.999981
21ur-2194	piRNA	-0.469711	0.999981
21ur-22	piRNA	-0.0577068	0.999981
21ur-2200	piRNA	-0.0394549	0.999981
21ur-2202	piRNA	-0.367988	0.999981
21ur-2210	piRNA	-0.223574	0.999981
21ur-2216	piRNA	0.0375182	0.999981
21ur-222	piRNA	0.126675	0.999981
21ur-2220	piRNA	-0.337895	0.999981
21ur-2221	piRNA	-0.539106	0.999981
21ur-2225	piRNA	-0.169859	0.999981
21ur-2226	piRNA	-0.225654	0.999981
21ur-2232	piRNA	0.0826033	0.999981
21ur-2233	piRNA	-0.0796295	0.999981
21ur-2236	piRNA	0.0583493	0.999981
21ur-2240	piRNA	-0.321421	0.999981
21ur-2241	piRNA	0.173963	0.999981
21ur-2242	piRNA	0.131968	0.999981
21ur-2243	piRNA	0.0555673	0.999981
21ur-2245	piRNA	-0.41936	0.999981
21ur-225	piRNA	0.229122	0.999981
21ur-2250	piRNA	-0.0974309	0.999981
21ur-2252	piRNA	-0.0840858	0.999981
21ur-226	piRNA	0.0347292	0.999981
21ur-2261	piRNA	-0.253002	0.999981
21ur-2263	piRNA	-0.0166709	0.999981
21ur-2264	piRNA	0.0124901	0.999981
21ur-2266	piRNA	4.26574e-05	0.999981
21ur-2273	piRNA	0.152433	0.999981
21ur-228	piRNA	-0.0670552	0.999981
21ur-2285	piRNA	0.0165042	0.999981
21ur-2286	piRNA	-0.135144	0.999981
21ur-2287	piRNA	-0.227366	0.999981
21ur-2289	piRNA	0.0920394	0.999981
21ur-229	piRNA	0.0476129	0.999981
21ur-2290	piRNA	-0.110147	0.999981
21ur-2292	piRNA	0.0100839	0.999981
21ur-2297	piRNA	-0.278838	0.999981
21ur-2298	piRNA	-0.203218	0.999981
21ur-2300	piRNA	0.164444	0.999981
21ur-2305	piRNA	0.0836136	0.999981
21ur-2307	piRNA	-0.0961312	0.999981
21ur-2308	piRNA	-0.298463	0.999981
21ur-2309	piRNA	-0.165142	0.999981
21ur-2311	piRNA	-0.00871283	0.999981
21ur-2314	piRNA	0.11546	0.999981
21ur-232	piRNA	-0.298212	0.999981
21ur-2325	piRNA	-0.197574	0.999981
21ur-2330	piRNA	0.0268889	0.999981
21ur-2331	piRNA	0.185343	0.999981
21ur-2332	piRNA	0.0290502	0.999981
21ur-2333	piRNA	0.150441	0.999981
21ur-2337	piRNA	0.0719502	0.999981
21ur-2340	piRNA	-0.345074	0.999981
21ur-2343	piRNA	0.0591964	0.999981
21ur-2345	piRNA	0.0730123	0.999981
21ur-2347	piRNA	-0.180481	0.999981
21ur-2348	piRNA	0.457054	0.999981
21ur-2349	piRNA	0.0693996	0.999981
21ur-235	piRNA	-0.0932737	0.999981
21ur-2351	piRNA	-0.159105	0.999981
21ur-2354	piRNA	-0.225968	0.999981
21ur-2355	piRNA	0.113087	0.999981
21ur-2358	piRNA	-0.386994	0.999981
21ur-2359	piRNA	0.0393401	0.999981
21ur-236	piRNA	0.279293	0.999981
21ur-2360	piRNA	-0.319665	0.999981
21ur-2364	piRNA	-0.460258	0.999981
21ur-2365	piRNA	0.19065	0.999981
21ur-2372	piRNA	0.135882	0.999981
21ur-2374	piRNA	-0.00183484	0.999981
21ur-2375	piRNA	0.110137	0.999981
21ur-2376	piRNA	0.0545586	0.999981
21ur-2378	piRNA	-0.0798818	0.999981
21ur-2379	piRNA	0.305423	0.999981
21ur-238	piRNA	0.0283397	0.999981
21ur-2388	piRNA	-0.1564	0.999981
21ur-2391	piRNA	0.0359259	0.999981
21ur-2392	piRNA	-0.199617	0.999981
21ur-2393	piRNA	-0.175326	0.999981
21ur-2395	piRNA	0.288547	0.999981
21ur-2400	piRNA	-0.0951464	0.999981
21ur-2404	piRNA	-0.0114521	0.999981
21ur-2406	piRNA	-0.22402	0.999981
21ur-2409	piRNA	0.0728566	0.999981
21ur-241	piRNA	0.172318	0.999981
21ur-2412	piRNA	-0.200137	0.999981
21ur-2414	piRNA	-0.10086	0.999981
21ur-242	piRNA	-0.0265299	0.999981
21ur-2420	piRNA	-0.0156663	0.999981
21ur-2428	piRNA	0.325066	0.999981
21ur-243	piRNA	-0.0249836	0.999981
21ur-2431	piRNA	0.252909	0.999981
21ur-2433	piRNA	0.283776	0.999981
21ur-2435	piRNA	-0.118223	0.999981
21ur-2437	piRNA	-0.151654	0.999981
21ur-2439	piRNA	0.142866	0.999981
21ur-244	piRNA	-0.410546	0.999981
21ur-2443	piRNA	-0.137768	0.999981
21ur-2445	piRNA	-0.107988	0.999981
21ur-2446	piRNA	-0.0166119	0.999981
21ur-2447	piRNA	-0.0259789	0.999981
21ur-2455	piRNA	0.121181	0.999981
21ur-2456	piRNA	-0.20754	0.999981
21ur-2459	piRNA	-0.0909456	0.999981
21ur-246	piRNA	-0.0541986	0.999981
21ur-2460	piRNA	-0.287281	0.999981
21ur-2461	piRNA	0.269381	0.999981
21ur-2464	piRNA	-0.230843	0.999981
21ur-2467	piRNA	0.247446	0.999981
21ur-247	piRNA	-0.111053	0.999981
21ur-2471	piRNA	0.0149682	0.999981
21ur-2472	piRNA	0.0215337	0.999981
21ur-2475	piRNA	-0.131133	0.999981
21ur-2477	piRNA	-0.219336	0.999981
21ur-2478	piRNA	0.412105	0.999981
21ur-2479	piRNA	-0.095284	0.999981
21ur-248	piRNA	0.0846246	0.999981
21ur-2484	piRNA	0.15233	0.999981
21ur-2486	piRNA	-0.20919	0.999981
21ur-2487	piRNA	-0.0996176	0.999981
21ur-2488	piRNA	0.350381	0.999981
21ur-2490	piRNA	-0.0697206	0.999981
21ur-2491	piRNA	0.0442657	0.999981
21ur-2492	piRNA	-0.0959116	0.999981
21ur-2498	piRNA	-0.0590941	0.999981
21ur-25	piRNA	-0.211115	0.999981
21ur-2501	piRNA	0.121833	0.999981
21ur-2502	piRNA	0.0933264	0.999981
21ur-251	piRNA	0.0261557	0.999981
21ur-2513	piRNA	0.109161	0.999981
21ur-2523	piRNA	-0.352666	0.999981
21ur-2525	piRNA	-0.00562414	0.999981
21ur-2526	piRNA	0.0707523	0.999981
21ur-253	piRNA	-0.117302	0.999981
21ur-2530	piRNA	0.0467519	0.999981
21ur-2535	piRNA	-0.0430463	0.999981
21ur-2537	piRNA	0.196973	0.999981
21ur-2538	piRNA	-0.0496646	0.999981
21ur-254	piRNA	0.292319	0.999981
21ur-2540	piRNA	-0.333391	0.999981
21ur-2543	piRNA	-0.0203141	0.999981
21ur-2544	piRNA	-0.0658147	0.999981
21ur-2545	piRNA	-0.000442695	0.999981
21ur-2547	piRNA	-0.0766724	0.999981
21ur-2548	piRNA	-0.0860636	0.999981
21ur-2549	piRNA	0.236004	0.999981
21ur-2551	piRNA	0.0334998	0.999981
21ur-2553	piRNA	-0.0327905	0.999981
21ur-2554	piRNA	0.246774	0.999981
21ur-2556	piRNA	-0.0794823	0.999981
21ur-2558	piRNA	0.1943	0.999981
21ur-2559	piRNA	-0.296037	0.999981
21ur-2560	piRNA	-0.155938	0.999981
21ur-2565	piRNA	-0.0871545	0.999981
21ur-2566	piRNA	0.231369	0.999981
21ur-2569	piRNA	-0.05887	0.999981
21ur-257	piRNA	-0.0106389	0.999981
21ur-2572	piRNA	-0.260045	0.999981
21ur-2573	piRNA	0.00950467	0.999981
21ur-2576	piRNA	-0.0252136	0.999981
21ur-258	piRNA	0.227498	0.999981
21ur-2582	piRNA	-0.282073	0.999981
21ur-2583	piRNA	-0.140807	0.999981
21ur-2584	piRNA	0.221322	0.999981
21ur-2586	piRNA	-0.0414709	0.999981
21ur-2589	piRNA	-0.0200735	0.999981
21ur-259	piRNA	0.0980932	0.999981
21ur-2590	piRNA	-0.185593	0.999981
21ur-2594	piRNA	0.0298198	0.999981
21ur-2599	piRNA	0.207698	0.999981
21ur-2602	piRNA	0.185807	0.999981
21ur-2604	piRNA	0.0172938	0.999981
21ur-2608	piRNA	0.0983664	0.999981
21ur-2609	piRNA	0.25952	0.999981
21ur-2616	piRNA	0.0796928	0.999981
21ur-2620	piRNA	-0.0133849	0.999981
21ur-2622	piRNA	-0.049388	0.999981
21ur-2623	piRNA	-0.137813	0.999981
21ur-2628	piRNA	-0.060768	0.999981
21ur-2630	piRNA	0.482064	0.999981
21ur-2632	piRNA	0.201705	0.999981
21ur-2634	piRNA	0.0651023	0.999981
21ur-2637	piRNA	0.0226768	0.999981
21ur-2638	piRNA	0.0965004	0.999981
21ur-2639	piRNA	-0.0692207	0.999981
21ur-264	piRNA	0.283187	0.999981
21ur-2644	piRNA	0.0581792	0.999981
21ur-2656	piRNA	-0.0917243	0.999981
21ur-2657	piRNA	-0.260045	0.999981
21ur-2659	piRNA	-0.0700168	0.999981
21ur-2662	piRNA	0.00952769	0.999981
21ur-2666	piRNA	-0.194607	0.999981
21ur-2667	piRNA	-0.376849	0.999981
21ur-2671	piRNA	0.0704229	0.999981
21ur-2672	piRNA	-0.0911142	0.999981
21ur-2675	piRNA	0.132561	0.999981
21ur-2678	piRNA	-0.236921	0.999981
21ur-2682	piRNA	-0.01337	0.999981
21ur-2683	piRNA	-0.28151	0.999981
21ur-2685	piRNA	-0.0211191	0.999981
21ur-2686	piRNA	0.0235211	0.999981
21ur-2688	piRNA	-0.189515	0.999981
21ur-2698	piRNA	-0.0152354	0.999981
21ur-27	piRNA	0.0117133	0.999981
21ur-2703	piRNA	0.0875214	0.999981
21ur-2706	piRNA	-0.0276277	0.999981
21ur-2709	piRNA	-0.210846	0.999981
21ur-271	piRNA	0.198462	0.999981
21ur-2710	piRNA	-0.0689323	0.999981
21ur-2712	piRNA	-0.0621267	0.999981
21ur-2716	piRNA	0.161135	0.999981
21ur-2718	piRNA	-0.0932737	0.999981
21ur-2719	piRNA	-0.0601001	0.999981
21ur-272	piRNA	0.00416824	0.999981
21ur-2721	piRNA	-0.0144679	0.999981
21ur-2722	piRNA	-0.177172	0.999981
21ur-2724	piRNA	-0.0683684	0.999981
21ur-2725	piRNA	-0.161576	0.999981
21ur-2728	piRNA	0.250465	0.999981
21ur-2729	piRNA	-0.270672	0.999981
21ur-2730	piRNA	-0.248902	0.999981
21ur-2732	piRNA	0.268848	0.999981
21ur-2733	piRNA	0.0170529	0.999981
21ur-2736	piRNA	0.0951329	0.999981
21ur-2737	piRNA	-0.193366	0.999981
21ur-2739	piRNA	0.0841883	0.999981
21ur-2740	piRNA	0.0969469	0.999981
21ur-2744	piRNA	0.11536	0.999981
21ur-2753	piRNA	0.115048	0.999981
21ur-2758	piRNA	-0.190552	0.999981
21ur-2759	piRNA	0.246628	0.999981
21ur-276	piRNA	-0.141716	0.999981
21ur-2760	piRNA	0.0894894	0.999981
21ur-2761	piRNA	0.044543	0.999981
21ur-2766	piRNA	0.217949	0.999981
21ur-2773	piRNA	-0.386244	0.999981
21ur-2774	piRNA	0.134452	0.999981
21ur-2778	piRNA	-0.200728	0.999981
21ur-2779	piRNA	0.319394	0.999981
21ur-2780	piRNA	0.392292	0.999981
21ur-2781	piRNA	-0.264015	0.999981
21ur-2782	piRNA	-0.174896	0.999981
21ur-2784	piRNA	-0.0761847	0.999981
21ur-2786	piRNA	-0.065333	0.999981
21ur-279	piRNA	-0.0612524	0.999981
21ur-2792	piRNA	-0.0694997	0.999981
21ur-2796	piRNA	-0.000525949	0.999981
21ur-2799	piRNA	0.000631771	0.999981
21ur-28	piRNA	0.0121384	0.999981
21ur-280	piRNA	0.14044	0.999981
21ur-2806	piRNA	-0.39682	0.999981
21ur-2810	piRNA	0.0464877	0.999981
21ur-2812	piRNA	-0.185532	0.999981
21ur-2814	piRNA	-0.205319	0.999981
21ur-2816	piRNA	0.238975	0.999981
21ur-2817	piRNA	-0.30792	0.999981
21ur-2818	piRNA	-0.153364	0.999981
21ur-2819	piRNA	-0.413564	0.999981
21ur-2822	piRNA	0.0478652	0.999981
21ur-2823	piRNA	-0.00211594	0.999981
21ur-2826	piRNA	0.0666091	0.999981
21ur-2827	piRNA	0.0661897	0.999981
21ur-283	piRNA	0.0905525	0.999981
21ur-2834	piRNA	0.0432207	0.999981
21ur-2838	piRNA	-0.193526	0.999981
21ur-2843	piRNA	0.094489	0.999981
21ur-2845	piRNA	-0.146212	0.999981
21ur-2849	piRNA	0.404614	0.999981
21ur-285	piRNA	0.0572132	0.999981
21ur-2850	piRNA	-0.0574841	0.999981
21ur-2854	piRNA	0.124644	0.999981
21ur-2864	piRNA	-0.229374	0.999981
21ur-2865	piRNA	-0.156034	0.999981
21ur-2866	piRNA	0.113714	0.999981
21ur-2867	piRNA	0.163529	0.999981
21ur-2870	piRNA	-0.105671	0.999981
21ur-2875	piRNA	-0.111628	0.999981
21ur-2876	piRNA	-0.0670764	0.999981
21ur-2878	piRNA	0.350551	0.999981
21ur-288	piRNA	-0.0194086	0.999981
21ur-2883	piRNA	0.0603037	0.999981
21ur-2884	piRNA	0.217319	0.999981
21ur-2885	piRNA	-0.142121	0.999981
21ur-2887	piRNA	0.00745377	0.999981
21ur-2889	piRNA	-0.141283	0.999981
21ur-2891	piRNA	-0.527149	0.999981
21ur-2892	piRNA	-0.236386	0.999981
21ur-2898	piRNA	-0.188118	0.999981
21ur-2900	piRNA	-0.0105693	0.999981
21ur-2902	piRNA	-0.102735	0.999981
21ur-2903	piRNA	0.0630323	0.999981
21ur-2904	piRNA	0.123018	0.999981
21ur-2907	piRNA	0.0966148	0.999981
21ur-2908	piRNA	0.0219321	0.999981
21ur-2909	piRNA	-0.0992574	0.999981
21ur-2911	piRNA	-0.228445	0.999981
21ur-2914	piRNA	-0.213455	0.999981
21ur-2916	piRNA	-0.0657702	0.999981
21ur-2917	piRNA	0.356877	0.999981
21ur-2919	piRNA	0.190309	0.999981
21ur-292	piRNA	0.302551	0.999981
21ur-2932	piRNA	0.0815517	0.999981
21ur-2933	piRNA	-0.129593	0.999981
21ur-2934	piRNA	0.0140344	0.999981
21ur-2935	piRNA	0.0789472	0.999981
21ur-2937	piRNA	-0.0523199	0.999981
21ur-294	piRNA	0.548057	0.999981
21ur-2940	piRNA	0.183797	0.999981
21ur-2941	piRNA	-0.086601	0.999981
21ur-2942	piRNA	-0.132561	0.999981
21ur-2943	piRNA	0.143945	0.999981
21ur-2944	piRNA	0.101221	0.999981
21ur-2948	piRNA	0.0605196	0.999981
21ur-2949	piRNA	-0.0456342	0.999981
21ur-295	piRNA	0.27605	0.999981
21ur-2952	piRNA	0.0536931	0.999981
21ur-2954	piRNA	0.019523	0.999981
21ur-2955	piRNA	0.103209	0.999981
21ur-2957	piRNA	0.0213487	0.999981
21ur-2959	piRNA	-0.393346	0.999981
21ur-296	piRNA	0.140225	0.999981
21ur-2965	piRNA	0.0841025	0.999981
21ur-2966	piRNA	0.150566	0.999981
21ur-2978	piRNA	-0.06036	0.999981
21ur-2979	piRNA	-0.237126	0.999981
21ur-2984	piRNA	-0.0280223	0.999981
21ur-2989	piRNA	-0.0848598	0.999981
21ur-2991	piRNA	0.0405015	0.999981
21ur-2998	piRNA	-0.115729	0.999981
21ur-3	piRNA	-0.156692	0.999981
21ur-30	piRNA	-0.0794305	0.999981
21ur-3004	piRNA	-0.0200855	0.999981
21ur-3006	piRNA	-0.0988379	0.999981
21ur-3010	piRNA	-0.0168203	0.999981
21ur-3014	piRNA	-0.321317	0.999981
21ur-3016	piRNA	-0.0735249	0.999981
21ur-3018	piRNA	-0.205614	0.999981
21ur-3026	piRNA	0.0212969	0.999981
21ur-3027	piRNA	-0.20712	0.999981
21ur-3029	piRNA	0.128935	0.999981
21ur-303	piRNA	-0.233088	0.999981
21ur-3030	piRNA	0.0749149	0.999981
21ur-3038	piRNA	-0.162196	0.999981
21ur-3039	piRNA	0.0980957	0.999981
21ur-304	piRNA	-0.655224	0.999981
21ur-3051	piRNA	-0.150929	0.999981
21ur-3052	piRNA	0.0974621	0.999981
21ur-3055	piRNA	0.261554	0.999981
21ur-3059	piRNA	-0.0974309	0.999981
21ur-3061	piRNA	0.124629	0.999981
21ur-3063	piRNA	0.0207709	0.999981
21ur-3065	piRNA	0.0756629	0.999981
21ur-3069	piRNA	0.136259	0.999981
21ur-3072	piRNA	-0.0450765	0.999981
21ur-3074	piRNA	-0.00287236	0.999981
21ur-3078	piRNA	0.256921	0.999981
21ur-3079	piRNA	-0.10832	0.999981
21ur-3085	piRNA	-0.0749157	0.999981
21ur-3086	piRNA	-0.0257271	0.999981
21ur-309	piRNA	-0.091286	0.999981
21ur-3092	piRNA	0.100761	0.999981
21ur-3093	piRNA	-0.18568	0.999981
21ur-3096	piRNA	-0.292573	0.999981
21ur-3098	piRNA	-0.00259797	0.999981
21ur-31	piRNA	-0.0226731	0.999981
21ur-310	piRNA	-0.147753	0.999981
21ur-3102	piRNA	-0.208101	0.999981
21ur-3103	piRNA	-0.0539988	0.999981
21ur-3106	piRNA	-0.148232	0.999981
21ur-3109	piRNA	0.0648546	0.999981
21ur-3110	piRNA	0.503983	0.999981
21ur-3111	piRNA	0.313142	0.999981
21ur-3112	piRNA	0.0721375	0.999981
21ur-3114	piRNA	-0.247544	0.999981
21ur-3117	piRNA	0.0717062	0.999981
21ur-3118	piRNA	-0.188795	0.999981
21ur-3120	piRNA	0.0549001	0.999981
21ur-3122	piRNA	0.152648	0.999981
21ur-3124	piRNA	0.0635855	0.999981
21ur-3128	piRNA	0.150566	0.999981
21ur-3129	piRNA	0.0924888	0.999981
21ur-313	piRNA	0.10672	0.999981
21ur-314	piRNA	-0.188689	0.999981
21ur-3145	piRNA	-0.0340236	0.999981
21ur-3149	piRNA	0.0175427	0.999981
21ur-3150	piRNA	-0.0687771	0.999981
21ur-3156	piRNA	0.0969768	0.999981
21ur-3158	piRNA	-0.0515382	0.999981
21ur-3160	piRNA	0.26659	0.999981
21ur-3167	piRNA	0.0289353	0.999981
21ur-3175	piRNA	-0.374061	0.999981
21ur-3177	piRNA	0.189939	0.999981
21ur-3179	piRNA	0.0601934	0.999981
21ur-3180	piRNA	0.0435483	0.999981
21ur-3181	piRNA	0.108117	0.999981
21ur-3184	piRNA	-0.0301293	0.999981
21ur-3187	piRNA	-0.282587	0.999981
21ur-3189	piRNA	-0.0375931	0.999981
21ur-319	piRNA	0.539942	0.999981
21ur-3195	piRNA	-0.529554	0.999981
21ur-3196	piRNA	-0.140807	0.999981
21ur-3197	piRNA	-0.01337	0.999981
21ur-3199	piRNA	0.321416	0.999981
[truncated: 13,820 more rows]

## Sheet: 2C-E miRNAs D2 vs D1 
2-cell embryo (2C-E) miRNA seq derived from day 2 vs day 1 adults
miRNA in bold correspond to DE miRNAs (log2 fold change ≤ -0.5 or ≥ 0.5 and p-value ≤ 0.05) and Yolk-enriched miRNAs are labelled in green. Results from three biological replicates.
Name	log2(FC)	FDR
mir-51-5p	0.0618576	5.15863e-15
mir-35-3p	0.180506	9.2188e-08
mir-37-3p	-0.0563294	2.26337e-07
mir-55-3p	0.655024	0.00632478
mir-2-5p	1.50629	0.0217772
mir-61-3p	-0.223939	0.03053
mir-45-5p	4.31526	0.0339261
mir-42-3p	0.369425	0.0521953
mir-82-3p	0.663724	0.0597322
mir-1832.1-5p	4.03056	0.0644605
mir-2214-5p	0.235647	0.0661358
mir-796-5p	4.26268	0.0690187
mir-41-5p	0.596189	0.082166
mir-81-5p	4.06848	0.0858855
mir-56-3p	0.40998	0.106089
mir-39-5p	1.52616	0.109168
mir-250-3p	-0.3	0.120441
mir-228-3p	3.88723	0.120441
mir-5592.1-3p	2.66094	0.128743
mir-36-3p	-0.0310159	0.146368
mir-49-3p	0.683503	0.1492
mir-67-5p	3.56248	0.151164
mir-2212-5p	2.81286	0.167857
mir-54-5p	1.52949	0.180742
mir-39-3p	0.151017	0.184068
mir-787-3p	3.43369	0.186692
mir-44-5p	1.20764	0.188314
mir-1-3p	1.40556	0.195844
mir-2209.3-3p	3.34661	0.202286
mir-75-5p	3.38843	0.208162
mir-73-5p	3.3168	0.212204
mir-50-5p	0.538083	0.214965
mir-1822-3p	3.52457	0.215154
mir-124-5p	3.97899	0.215154
mir-4808-3p	-2.39997	0.223652
mir-58.1-3p	0.402972	0.237743
mir-353-5p	3.12122	0.237743
mir-66-3p	3.23589	0.242282
mir-81-3p	0.615218	0.243175
mir-73-3p	0.144721	0.243175
mir-359-3p	3.76789	0.243175
mir-253-3p	-0.418985	0.26347
mir-2220-3p	-2.73058	0.275444
mir-76-3p	1.56124	0.27567
mir-79-5p	2.48118	0.276409
mir-57-5p	0.567302	0.277353
mir-58.1-5p	1.43554	0.279485
mir-57-3p	3.12195	0.281734
mir-52-5p	0.379252	0.288243
mir-790-3p	2.50929	0.288313
mir-238-3p	-0.907523	0.290987
mir-241-5p	1.84323	0.291071
mir-86-5p	1.4044	0.309222
mir-44-3p	0.442367	0.320935
mir-233-3p	1.21157	0.322735
mir-90-3p	-0.116048	0.32502
mir-1829.1-3p	2.466	0.336965
mir-1829.1-5p	2.3516	0.338841
mir-236-3p	1.46502	0.342293
mir-4810.1-3p	-2.27855	0.358623
mir-1821-3p	2.28835	0.364518
mir-80-5p	0.728304	0.378073
mir-72-3p	1.34283	0.384317
mir-239.1-3p	-2.27855	0.389575
mir-800-5p	-2.36994	0.39778
mir-4813-5p	2.40576	0.413227
mir-252-5p	-2.77737	0.413686
mir-244-5p	0.959505	0.414362
mir-358-3p	-1.97361	0.425819
mir-236-5p	1.97775	0.428948
mir-74-5p	1.84338	0.429175
mir-247-3p	2.01359	0.439023
mir-245-3p	1.98828	0.446098
mir-233-5p	-1.94413	0.449217
mir-56-5p	-2.08879	0.449389
mir-1823-5p	-1.76653	0.451758
mir-64-3p	1.89882	0.453098
mir-64-5p	0.113089	0.458832
mir-59-3p	-0.731475	0.461855
mir-229-5p	0.420574	0.466086
mir-243-5p	2.02307	0.46744
mir-2217.1-3p	1.30478	0.471966
mir-82-5p	-1.49947	0.477541
mir-789.1-5p	-1.02814	0.479975
mir-231-5p	2.03701	0.48057
mir-8196.2-5p	1.37568	0.481062
mir-795-5p	-1.57151	0.485535
mir-4812-3p	-1.08203	0.486487
mir-48-5p	-0.489539	0.490944
mir-79-3p	0.543185	0.492596
mir-4916-3p	0.959851	0.493492
mir-4923.2-3p	-1.72575	0.501985
mir-38-5p	0.261326	0.50306
mir-240-3p	-0.760165	0.503862
mir-2214-3p	0.323342	0.50769
mir-45-3p	0.342371	0.512461
mir-77-5p	1.99954	0.513278
mir-1822-5p	1.681	0.513337
mir-235-3p	1.00491	0.517693
mir-2219-5p	-1.11587	0.529608
mir-47-3p	1.14401	0.529867
mir-43-5p	1.05317	0.533496
mir-63-5p	-0.950192	0.53372
mir-63-3p	-1.80512	0.533736
mir-72-5p	-0.0295388	0.537555
mir-4813-3p	1.70504	0.540512
mir-43-3p	0.565244	0.541498
mir-80-3p	-0.16243	0.543168
mir-8201-3p	-1.39396	0.544415
mir-1018-3p	-1.71125	0.546056
mir-52-3p	1.29189	0.548912
mir-2218.2-3p	-1.2662	0.556258
mir-5545-5p	1.87382	0.556855
mir-85-3p	1.38422	0.557489
mir-229-3p	0.721338	0.559516
mir-255-5p	1.00673	0.565323
mir-70-5p	1.00673	0.57189
mir-798-3p	-1.4269	0.573907
mir-2-3p	0.563941	0.575964
mir-46-5p	0.961582	0.5764
mir-789.2-3p	1.07882	0.577681
mir-55-5p	1.01291	0.579154
mir-238-5p	-1.49097	0.579333
mir-8195-5p	1.11979	0.581026
mir-1022-3p	-0.906078	0.58139
mir-260-3p	0.618657	0.582855
mir-8196.2-3p	-1.16391	0.583746
mir-86-3p	1.94456	0.584707
mir-124-3p	1.23438	0.58521
mir-4916-5p	1.9874	0.586578
mir-259-5p	-1.25709	0.588699
mir-47-5p	1.64788	0.590689
mir-248-3p	-1.24525	0.595867
mir-36-5p	-1.60591	0.599195
mir-800-3p	-1.46634	0.608009
mir-1829.3-5p	-0.595575	0.610474
mir-789.1-3p	1.04394	0.612455
mir-1-5p	1.15077	0.618701
mir-239.1-5p	-1.10453	0.627354
mir-4812-5p	-2.13378	0.628239
mir-5592.2-3p	1.04202	0.632701
mir-61-5p	-0.317252	0.633156
mir-4809-3p	-1.32999	0.633382
mir-5546-3p	-1.18586	0.634475
mir-251-5p	1.02338	0.636205
mir-1830-3p	1.47569	0.636452
mir-1832.1-3p	1.11979	0.637998
mir-65-5p	0.0599681	0.640472
mir-54-3p	0.218297	0.64406
mir-37-5p	-0.404102	0.653701
mir-235-5p	1.03336	0.655146
mir-62-3p	1.05972	0.655546
mir-49-5p	0.612792	0.657185
mir-70-3p	0.206067	0.663716
mir-87-5p	0.998062	0.664149
mir-789.2-5p	1.15062	0.669467
mir-8196.1-3p	0.907874	0.671938
mir-1823-3p	1.07172	0.676802
mir-84-5p	-0.931826	0.679766
mir-5547-5p	-0.454231	0.68511
mir-84-3p	0.575578	0.686974
mir-35-5p	0.735314	0.687569
mir-2208.1-5p	-1.07048	0.689041
mir-40-3p	-0.128646	0.690125
mir-262-3p	1.24527	0.690246
mir-2209.3-5p	-1.06516	0.693048
mir-87-3p	0.246099	0.696063
mir-34-5p	-0.799646	0.706284
mir-90-5p	0.781143	0.713666
mir-74-3p	-0.129541	0.715295
mir-2213-5p	-1.20423	0.726764
mir-234-3p	-0.512212	0.739958
mir-8187-3p	-0.341875	0.743644
mir-75-3p	0.726006	0.745687
mir-4923.1-3p	0.392068	0.745766
mir-50-3p	0.811406	0.748754
mir-5592.1-5p	0.575578	0.751474
mir-1819-3p	0.344493	0.75239
mir-799-3p	0.575578	0.755994
mir-791-3p	-0.395006	0.758787
mir-2209.1-3p	-0.279522	0.760466
mir-1829.3-3p	0.346029	0.761513
mir-8192-3p	-0.224692	0.769683
mir-65-3p	-0.913056	0.773102
mir-60-5p	-0.458758	0.780833
lin-4-5p	-0.326098	0.78563
mir-38-3p	0.0348207	0.788659
mir-354-3p	-0.721583	0.789074
mir-250-5p	0.0707398	0.793442
mir-8211-5p	-0.255974	0.793534
mir-257-5p	0.100517	0.793759
mir-4937-5p	-0.111214	0.795216
mir-786-3p	-0.537403	0.798081
mir-5551-5p	-0.190176	0.799517
mir-5549-3p	-0.671569	0.800312
mir-788-3p	0.384562	0.802975
mir-355-5p	0.384257	0.804319
mir-71-3p	0.267466	0.80569
mir-232-3p	0.246862	0.80958
mir-259-3p	0.476611	0.812036
mir-8191-5p	0.164549	0.813399
mir-785-3p	-0.147802	0.813867
mir-77-3p	-0.27399	0.813963
mir-246-3p	-0.291126	0.814723
mir-231-3p	0.239965	0.814782
mir-4936-3p	0.231372	0.814879
let-7-5p	-0.377105	0.818404
mir-41-3p	-0.1354	0.818887
mir-8196.1-5p	-0.643415	0.82131
mir-4805-3p	-0.396673	0.822696
mir-83-3p	0.847307	0.822945
mir-51-3p	0.634747	0.823272
mir-242-5p	0.294342	0.825082
mir-53-3p	0.38933	0.828679
mir-237-5p	0.226305	0.836386
mir-58.2-5p	-0.573107	0.837093
mir-2219-3p	0.516707	0.84244
mir-230-3p	-0.593114	0.84278
mir-1020-3p	-0.0391429	0.84814
mir-66-5p	0.0377201	0.853586
mir-258.1-5p	-0.0834642	0.853964
mir-249-3p	-0.224692	0.863063
mir-4807-3p	-0.346476	0.8644
mir-357-3p	0.187173	0.870392
mir-67-3p	0.139803	0.871206
mir-8205-3p	0.26654	0.877902
mir-2211-3p	-0.224692	0.881
mir-1820-5p	-0.0391429	0.882026
mir-228-5p	0.0175989	0.883237
mir-53-5p	-0.0461928	0.883989
mir-34-3p	0.206463	0.885684
mir-60-3p	0.445347	0.886132
mir-1829.2-5p	-0.0764873	0.893005
mir-258.2-5p	-0.342823	0.895633
mir-8205-5p	0.344714	0.917283
mir-71-5p	-0.00926579	0.933626
mir-254-3p	0.199766	0.93409
mir-232-5p	-0.0391429	0.940288
mir-46-3p	-0.117343	0.944558
mir-4938-5p	-0.0391429	0.953228
mir-1022-5p	0.188614	0.955006
mir-1829.2-3p	-0.116811	0.958823
mir-243-3p	-0.0473327	0.961031
mir-42-5p	-0.0314512	0.970949
mir-356.2-3p	-0.153985	0.971237
mir-4926-5p	-0.0844195	0.976295
mir-239.2-5p	0	1
mir-241-3p	0	1
mir-253-5p	0	1
mir-8195-3p	0	1
lsy-6-3p	0	1
mir-240-5p	0	1
mir-1020-5p	0	1
mir-40-5p	0	1
mir-788-5p	0	1
mir-793-3p	0	1
mir-1830-5p	0	1
mir-5545-3p	0	1
mir-2210-3p	0	1
mir-8211-3p	0	1
F39B1.3-5p	0	1
let-7-3p	0	1
lin-4-3p	0	1
lsy-6-5p	0	1
mir-1019-3p	0	1
mir-1019-5p	0	1
mir-1021-5p	0	1
mir-1817-5p	0	1
mir-1818-5p	0	1
mir-1819-5p	0	1
mir-1820-3p	0	1
mir-1821-5p	0	1
mir-1824-3p	0	1
mir-1824-5p	0	1
mir-1828-3p	0	1
mir-1832.2-3p	0	1
mir-1832.2-5p	0	1
mir-1833-3p	0	1
mir-2207-3p	0	1
mir-2207-5p	0	1
mir-2208.1-3p	0	1
mir-2208.2-3p	0	1
mir-2208.2-5p	0	1
mir-2209.1-5p	0	1
mir-2209.2-3p	0	1
mir-2209.2-5p	0	1
mir-2210-5p	0	1
mir-2211-5p	0	1
mir-2212-3p	0	1
mir-2213-3p	0	1
mir-2215-3p	0	1
mir-2215-5p	0	1
mir-2216-3p	0	1
mir-2216-5p	0	1
mir-2217.1-5p	0	1
mir-2217.2-3p	0	1
mir-2217.2-5p	0	1
mir-2217.3-3p	0	1
mir-2217.3-5p	0	1
mir-2217.4-3p	0	1
mir-2217.4-5p	0	1
mir-2217.5-3p	0	1
mir-2217.5-5p	0	1
mir-2218.1-3p	0	1
mir-2218.1-5p	0	1
mir-2218.2-5p	0	1
mir-2220-5p	0	1
mir-2221-3p	0	1
mir-230-5p	0	1
mir-234-5p	0	1
mir-237-3p	0	1
mir-239.2-3p	0	1
mir-244-3p	0	1
mir-245-5p	0	1
mir-246-5p	0	1
mir-247-5p	0	1
mir-249-5p	0	1
mir-252-3p	0	1
mir-254-5p	0	1
mir-255-3p	0	1
mir-256-3p	0	1
mir-261-3p	0	1
mir-264-3p	0	1
mir-265-3p	0	1
mir-266-5p	0	1
mir-267-5p	0	1
mir-268-5p	0	1
mir-269-5p	0	1
mir-270-3p	0	1
mir-271-5p	0	1
mir-272-3p	0	1
mir-273-3p	0	1
mir-2953-3p	0	1
mir-2953-5p	0	1
mir-355-3p	0	1
mir-356.1-5p	0	1
mir-356.2-5p	0	1
mir-357-5p	0	1
mir-358-5p	0	1
mir-360-3p	0	1
mir-360-5p	0	1
mir-392-3p	0	1
mir-392-5p	0	1
mir-4805-5p	0	1
mir-4806-3p	0	1
mir-4806-5p	0	1
mir-4808-5p	0	1
mir-4809-5p	0	1
mir-4810.2-3p	0	1
mir-4810.2-5p	0	1
mir-4811-3p	0	1
mir-4811-5p	0	1
mir-4814-3p	0	1
mir-4814-5p	0	1
mir-4815-3p	0	1
mir-4920-5p	0	1
mir-4921-3p	0	1
mir-4922.1-3p	0	1
mir-4922.2-3p	0	1
mir-4924-5p	0	1
mir-4925-3p	0	1
mir-4927-5p	0	1
mir-4929-3p	0	1
mir-4930-5p	0	1
mir-4931-3p	0	1
mir-4932-5p	0	1
mir-4933-5p	0	1
mir-4934-3p	0	1
mir-4935-5p	0	1
mir-5546-5p	0	1
mir-5547-3p	0	1
mir-5548-3p	0	1
mir-5548-5p	0	1
mir-5549-5p	0	1
mir-5550-3p	0	1
mir-5550-5p	0	1
mir-5551-3p	0	1
mir-5552-3p	0	1
mir-5552-5p	0	1
mir-5553-3p	0	1
mir-5553-5p	0	1
mir-5592.2-5p	0	1
mir-5593.1-3p	0	1
mir-5593.1-5p	0	1
mir-5593.2-3p	0	1
mir-5593.2-5p	0	1
mir-5594-3p	0	1
mir-5594-5p	0	1
mir-5595-3p	0	1
mir-5595-5p	0	1
mir-58.2-3p	0	1
miR58Synth	0	1
mir-59-5p	0	1
mir-76-5p	0	1
mir-78-3p	0	1
mir-784-3p	0	1
mir-784-5p	0	1
mir-785-5p	0	1
mir-786-5p	0	1
mir-787-5p	0	1
mir-790-5p	0	1
mir-791-5p	0	1
mir-792-3p	0	1
mir-792-5p	0	1
mir-794-3p	0	1
mir-794-5p	0	1
mir-795-3p	0	1
mir-797-3p	0	1
mir-797-5p	0	1
mir-8186.1-3p	0	1
mir-8186.1-5p	0	1
mir-8186.2-3p	0	1
mir-8186.2-5p	0	1
mir-8187-5p	0	1
mir-8188-3p	0	1
mir-8188-5p	0	1
mir-8189-3p	0	1
mir-8189-5p	0	1
mir-8190-3p	0	1
mir-8190-5p	0	1
mir-8191-3p	0	1
mir-8192-5p	0	1
mir-8193-3p	0	1
mir-8193-5p	0	1
mir-8194-3p	0	1
mir-8194-5p	0	1
mir-8197-3p	0	1
mir-8197-5p	0	1
mir-8198-5p	0	1
mir-8200-3p	0	1
mir-8200-5p	0	1
mir-8201-5p	0	1
mir-8202-3p	0	1
mir-8203-3p	0	1
mir-8203-5p	0	1
mir-8204-3p	0	1
mir-8204-5p	0	1
mir-8206-3p	0	1
mir-8206-5p	0	1
mir-8207-3p	0	1
mir-8207-5p	0	1
mir-8208-3p	0	1
mir-8208-5p	0	1
mir-8209-3p	0	1
mir-8209-5p	0	1
mir-8210-3p	0	1
mir-8210-5p	0	1
mir-8212-3p	0	1
mir-8212-5p	0	1
mir-83-5p	0	1
mir-84-3p	0	1
mir-85-5p	0	1

## Sheet: 2C-E miRNAs D3 vs D1 
2-cell embryo (2C-E) miRNA seq derived from day 3 vs day 1 adults
miRNA in bold correspond to DE miRNAs (log2 fold change ≤ -0.5 or ≥ 0.5 and p-value ≤ 0.05) and Yolk-enriched miRNAs are labelled in green. Results from three biological replicates.
Name	log2(FC)	FDR
mir-58.1-3p	1.99668	2.72192e-50
mir-70-3p	3.15525	5.35215e-25
mir-228-5p	1.58453	5.51194e-15
mir-40-3p	-0.294756	1.86696e-13
mir-80-3p	1.1488	2.25604e-11
mir-52-5p	0.756553	2.63632e-11
mir-81-3p	1.53428	3.3283e-11
mir-82-3p	1.25528	6.14134e-09
mir-55-3p	1.01643	5.14019e-08
mir-235-3p	2.81457	9.96508e-07
mir-57-5p	1.18428	2.10393e-06
mir-48-5p	2.22576	2.9917e-06
mir-71-5p	0.72353	3.65286e-06
mir-76-3p	2.69546	8.90334e-06
let-7-5p	2.54327	2.57979e-05
mir-49-3p	1.29647	4.57966e-05
mir-56-3p	0.911446	4.62944e-05
mir-86-5p	2.71876	0.000108414
mir-236-3p	3.46708	0.000152032
mir-1-3p	2.02039	0.000233774
mir-246-3p	2.07565	0.000313358
mir-37-3p	-0.168316	0.000421596
mir-237-5p	2.56887	0.000529801
mir-244-5p	2.1312	0.000536773
mir-79-3p	1.86727	0.00125827
mir-245-3p	4.2215	0.00142213
mir-84-5p	3.19812	0.00148552
mir-124-3p	3.69734	0.00203914
mir-35-3p	-0.070416	0.00270372
mir-238-3p	1.43861	0.0027838
mir-77-5p	5.08479	0.00381645
mir-248-3p	4.62061	0.00747084
mir-355-5p	4.42754	0.0194739
mir-2-3p	1.93391	0.0255454
mir-253-3p	-0.868253	0.0276273
mir-242-5p	3.48737	0.0375048
mir-34-5p	3.15599	0.037615
mir-36-3p	-0.210772	0.0477053
mir-795-5p	4.14452	0.0607237
mir-80-5p	1.44359	0.0721013
mir-239.1-5p	2.64911	0.0950581
mir-77-3p	2.06312	0.105491
mir-85-3p	3.18458	0.107959
mir-46-5p	1.88062	0.119433
mir-63-3p	2.21271	0.129609
mir-58.1-5p	1.5499	0.163297
lin-4-5p	1.30405	0.178582
mir-234-3p	1.29639	0.196213
mir-47-3p	1.86619	0.222078
mir-67-3p	2.31137	0.22279
mir-75-3p	3.68432	0.236298
mir-46-3p	1.68965	0.239659
mir-233-3p	1.47365	0.276298
mir-250-3p	-0.284119	0.307066
mir-230-3p	2.64418	0.310228
mir-231-3p	0.859279	0.357378
mir-83-3p	2.39327	0.385431
mir-241-5p	1.45031	0.478059
mir-239.2-5p	2.33426	0.50145
mir-786-3p	1.37419	0.503598
mir-252-5p	1.40922	0.506414
mir-47-5p	1.76715	0.52762
mir-60-3p	1.17547	0.553298
mir-232-3p	1.17664	0.584043
mir-243-3p	0.653636	0.586157
mir-45-3p	0.36653	0.61791
mir-44-3p	0.387084	0.674855
mir-53-5p	0.158669	0.690984
mir-59-3p	-0.544523	0.694934
mir-73-3p	-0.121398	0.696062
mir-259-5p	1.63728	0.70628
mir-41-3p	-0.125905	0.712415
mir-51-5p	0.00682195	0.715858
mir-90-3p	0.0378599	0.756919
mir-65-5p	-0.0485159	0.777248
mir-356.2-3p	-0.060815	0.802438
mir-66-5p	0.0527021	0.802669
mir-240-3p	0.339137	0.819391
mir-42-3p	0.0226569	0.824069
mir-72-5p	0.0300821	0.831272
mir-64-5p	-0.0597056	0.851285
mir-74-3p	0.1757	0.881481
mir-38-3p	-0.0121625	0.91606
mir-241-3p	0	1
mir-41-5p	1.16027	4.63429e-05
mir-2214-3p	1.45491	0.000110516
mir-235-5p	4.94357	0.00067475
mir-2-5p	1.65426	0.000898268
mir-251-5p	5.59087	0.00105773
mir-50-5p	1.18843	0.00475609
mir-54-3p	0.892654	0.0295926
mir-236-5p	3.98547	0.0312605
mir-790-3p	4.73273	0.0429149
mir-63-5p	4.35614	0.0477053
mir-353-5p	3.42084	0.0961293
mir-243-5p	3.9394	0.105491
mir-86-3p	3.42269	0.136732
mir-1822-3p	3.78731	0.148559
mir-238-5p	3.3652	0.172945
mir-124-5p	3.37084	0.186591
mir-67-5p	3.17994	0.191789
mir-5592.1-3p	2.19932	0.222052
mir-1832.1-5p	3.3833	0.23742
mir-39-3p	0.125642	0.241766
mir-228-3p	3.99002	0.243968
mir-72-3p	1.80324	0.256578
mir-75-5p	3.45542	0.258551
mir-54-5p	1.04716	0.268784
mir-87-5p	2.49816	0.289804
mir-1822-5p	3.70851	0.290596
mir-87-3p	1.23241	0.290815
mir-61-5p	-1.1568	0.29619
mir-254-3p	3.12039	0.321968
mir-1820-5p	3.26056	0.325003
mir-2209.1-3p	-2.07707	0.326209
mir-257-5p	-2.70184	0.348822
mir-61-3p	-0.196338	0.371246
mir-1829.2-5p	-0.611001	0.381557
mir-8191-5p	1.41642	0.397615
mir-796-5p	2.70169	0.418511
mir-4916-3p	1.34631	0.419307
mir-4812-3p	2.83989	0.422923
mir-5549-3p	2.36118	0.424702
mir-79-5p	2.20411	0.462442
mir-52-3p	1.53339	0.469056
mir-800-3p	-2.52536	0.478512
mir-260-3p	0.996564	0.487484
mir-50-3p	2.33224	0.496637
mir-42-5p	-1.52239	0.501697
mir-2214-5p	0.221427	0.505366
mir-51-3p	-2.12939	0.508204
mir-249-3p	2.7201	0.509858
mir-1829.3-5p	-0.77619	0.513396
mir-8196.1-3p	1.92451	0.514646
mir-1022-5p	2.62478	0.518229
mir-789.2-5p	1.68329	0.521042
mir-8196.2-3p	-1.30557	0.525562
mir-253-5p	1.65189	0.54836
mir-8196.2-5p	1.39972	0.554571
mir-57-3p	2.69044	0.555571
mir-8195-3p	1.37076	0.555863
mir-4808-3p	-2.41987	0.557678
mir-55-5p	2.19397	0.562274
mir-73-5p	1.50946	0.564942
mir-71-3p	1.81117	0.569857
mir-4812-5p	1.07815	0.589857
mir-70-5p	2.14699	0.590233
mir-8201-3p	-1.51679	0.595799
mir-354-3p	1.96661	0.597171
lsy-6-3p	2.60923	0.601093
mir-5592.2-3p	0.985009	0.60465
mir-1829.1-3p	-2.1785	0.604978
mir-800-5p	-2.3411	0.605106
mir-2209.3-5p	-2.14759	0.606033
mir-358-3p	-2.23602	0.606942
mir-258.2-5p	-1.85458	0.607224
mir-240-5p	1.39972	0.612241
mir-64-3p	1.40544	0.625386
mir-1020-5p	1.14819	0.626133
mir-4923.2-3p	-1.54565	0.62823
mir-35-5p	-0.629731	0.629033
mir-8195-5p	1.40871	0.630927
mir-2220-3p	2.16202	0.634389
mir-4916-5p	-1.61342	0.63783
mir-81-5p	2.14516	0.642176
mir-1819-3p	1.06749	0.644316
mir-1821-3p	2.12993	0.65327
mir-36-5p	-0.920412	0.656931
mir-90-5p	1.09011	0.661498
mir-37-5p	-0.772699	0.666829
mir-40-5p	2.12422	0.669947
mir-239.1-3p	-1.81672	0.67454
mir-788-5p	1.88827	0.677091
mir-39-5p	0.439076	0.681629
mir-45-5p	1.94233	0.683271
mir-1018-3p	-1.21761	0.684535
mir-4937-5p	-1.82162	0.684605
mir-793-3p	1.94233	0.685743
mir-255-5p	0.762968	0.689156
mir-49-5p	0.332089	0.691584
mir-4936-3p	0.543275	0.692318
mir-4813-3p	1.38094	0.70306
mir-1829.3-3p	-0.604238	0.705636
mir-4926-5p	0.510948	0.70855
mir-82-5p	-0.686122	0.713721
mir-74-5p	0.478479	0.714652
mir-1830-3p	0.660317	0.7156
mir-233-5p	0.474402	0.737033
mir-38-5p	0.155523	0.743401
mir-43-3p	-0.164104	0.746147
mir-56-5p	0.372683	0.75036
mir-229-5p	0.0932168	0.750485
mir-787-3p	0.74768	0.7515
mir-2212-5p	0.674266	0.752042
mir-258.1-5p	-0.619343	0.754069
mir-1830-5p	0.942493	0.756583
mir-4813-5p	0.3119	0.757905
mir-66-3p	0.933813	0.768662
mir-785-3p	1.28776	0.774618
mir-250-5p	-0.0758423	0.779054
mir-62-3p	-0.781957	0.781888
mir-53-3p	0.350469	0.782174
mir-4810.1-3p	-0.253596	0.784532
mir-5546-3p	-0.531805	0.790824
mir-5545-3p	0.472038	0.791536
mir-34-3p	0.22893	0.795726
mir-229-3p	0.296124	0.808867
mir-60-5p	0.746589	0.809231
mir-2218.2-3p	1.00115	0.811061
mir-58.2-5p	0.358519	0.812826
mir-65-3p	-0.759032	0.814761
mir-4807-3p	0.877409	0.81974
mir-262-3p	0.572313	0.826134
mir-359-3p	0.999257	0.828344
mir-44-5p	-0.00676039	0.837459
mir-5551-5p	0.0361679	0.840236
mir-789.1-5p	0.500964	0.840265
mir-798-3p	0.700175	0.841564
mir-2210-3p	0.848931	0.857162
mir-259-3p	-0.0251436	0.865818
mir-231-5p	0.53754	0.883508
mir-8211-3p	0.713809	0.887056
mir-2217.1-3p	-0.260628	0.894874
mir-1829.2-3p	-0.0360278	0.905198
mir-43-5p	-0.369567	0.905562
mir-2208.1-5p	-0.127354	0.91127
mir-2219-5p	-0.348139	0.938649
mir-357-3p	0.168064	0.955415
mir-788-3p	0.07609	0.963749
F39B1.3-5p	0	1
let-7-3p	0	1
lin-4-3p	0	1
mir-84-3p	0	1
lsy-6-5p	0	1
mir-1019-3p	0	1
mir-1019-5p	0	1
mir-1020-3p	0	1
mir-1021-5p	0	1
mir-1022-3p	0	1
mir-1-5p	0	1
mir-1817-5p	0	1
mir-1818-5p	0	1
mir-1819-5p	0	1
mir-1820-3p	0	1
mir-1821-5p	0	1
mir-1823-3p	0	1
mir-1823-5p	0	1
mir-1824-3p	0	1
mir-1824-5p	0	1
mir-1828-3p	0	1
mir-1829.1-5p	0	1
mir-1832.1-3p	0	1
mir-1832.2-3p	0	1
mir-1832.2-5p	0	1
mir-1833-3p	0	1
mir-2207-3p	0	1
mir-2207-5p	0	1
mir-2208.1-3p	0	1
mir-2208.2-3p	0	1
mir-2208.2-5p	0	1
mir-2209.1-5p	0	1
mir-2209.2-3p	0	1
mir-2209.2-5p	0	1
mir-2209.3-3p	0	1
mir-2210-5p	0	1
mir-2211-3p	0	1
mir-2211-5p	0	1
mir-2212-3p	0	1
mir-2213-3p	0	1
mir-2213-5p	0	1
mir-2215-3p	0	1
mir-2215-5p	0	1
mir-2216-3p	0	1
mir-2216-5p	0	1
mir-2217.1-5p	0	1
mir-2217.2-3p	0	1
mir-2217.2-5p	0	1
mir-2217.3-3p	0	1
mir-2217.3-5p	0	1
mir-2217.4-3p	0	1
mir-2217.4-5p	0	1
mir-2217.5-3p	0	1
mir-2217.5-5p	0	1
mir-2218.1-3p	0	1
mir-2218.1-5p	0	1
mir-2218.2-5p	0	1
mir-2219-3p	0	1
mir-2220-5p	0	1
mir-2221-3p	0	1
mir-230-5p	0	1
mir-232-5p	0	1
mir-234-5p	0	1
mir-237-3p	0	1
mir-239.2-3p	0	1
mir-244-3p	0	1
mir-245-5p	0	1
mir-246-5p	0	1
mir-247-3p	0	1
mir-247-5p	0	1
mir-249-5p	0	1
mir-252-3p	0	1
mir-254-5p	0	1
mir-255-3p	0	1
mir-256-3p	0	1
mir-261-3p	0	1
mir-264-3p	0	1
mir-265-3p	0	1
mir-266-5p	0	1
mir-267-5p	0	1
mir-268-5p	0	1
mir-269-5p	0	1
mir-270-3p	0	1
mir-271-5p	0	1
mir-272-3p	0	1
mir-273-3p	0	1
mir-2953-3p	0	1
mir-2953-5p	0	1
mir-355-3p	0	1
mir-356.1-5p	0	1
mir-356.2-5p	0	1
mir-357-5p	0	1
mir-358-5p	0	1
mir-360-3p	0	1
mir-360-5p	0	1
mir-392-3p	0	1
mir-392-5p	0	1
mir-4805-3p	0	1
mir-4805-5p	0	1
mir-4806-3p	0	1
mir-4806-5p	0	1
mir-4808-5p	0	1
mir-4809-3p	0	1
mir-4809-5p	0	1
mir-4810.2-3p	0	1
mir-4810.2-5p	0	1
mir-4811-3p	0	1
mir-4811-5p	0	1
mir-4814-3p	0	1
mir-4814-5p	0	1
mir-4815-3p	0	1
mir-4920-5p	0	1
mir-4921-3p	0	1
mir-4922.1-3p	0	1
mir-4922.2-3p	0	1
mir-4923.1-3p	0	1
mir-4924-5p	0	1
mir-4925-3p	0	1
mir-4927-5p	0	1
mir-4929-3p	0	1
mir-4930-5p	0	1
mir-4931-3p	0	1
mir-4932-5p	0	1
mir-4933-5p	0	1
mir-4934-3p	0	1
mir-4935-5p	0	1
mir-4938-5p	0	1
mir-5545-5p	0	1
mir-5546-5p	0	1
mir-5547-3p	0	1
mir-5547-5p	0	1
mir-5548-3p	0	1
mir-5548-5p	0	1
mir-5549-5p	0	1
mir-5550-3p	0	1
mir-5550-5p	0	1
mir-5551-3p	0	1
mir-5552-3p	0	1
mir-5552-5p	0	1
mir-5553-3p	0	1
mir-5553-5p	0	1
mir-5592.1-5p	0	1
mir-5592.2-5p	0	1
mir-5593.1-3p	0	1
mir-5593.1-5p	0	1
mir-5593.2-3p	0	1
mir-5593.2-5p	0	1
mir-5594-3p	0	1
mir-5594-5p	0	1
mir-5595-3p	0	1
mir-5595-5p	0	1
mir-58.2-3p	0	1
miR58Synth	0	1
mir-59-5p	0	1
mir-76-5p	0	1
mir-78-3p	0	1
mir-784-3p	0	1
mir-784-5p	0	1
mir-785-5p	0	1
mir-786-5p	0	1
mir-787-5p	0	1
mir-789.1-3p	0	1
mir-789.2-3p	0	1
mir-790-5p	0	1
mir-791-3p	0	1
mir-791-5p	0	1
mir-792-3p	0	1
mir-792-5p	0	1
mir-794-3p	0	1
mir-794-5p	0	1
mir-795-3p	0	1
mir-797-3p	0	1
mir-797-5p	0	1
mir-799-3p	0	1
mir-8186.1-3p	0	1
mir-8186.1-5p	0	1
mir-8186.2-3p	0	1
mir-8186.2-5p	0	1
mir-8187-3p	0	1
mir-8187-5p	0	1
mir-8188-3p	0	1
mir-8188-5p	0	1
mir-8189-3p	0	1
mir-8189-5p	0	1
mir-8190-3p	0	1
mir-8190-5p	0	1
mir-8191-3p	0	1
mir-8192-3p	0	1
mir-8192-5p	0	1
mir-8193-3p	0	1
mir-8193-5p	0	1
mir-8194-3p	0	1
mir-8194-5p	0	1
mir-8196.1-5p	0	1
mir-8197-3p	0	1
mir-8197-5p	0	1
mir-8198-5p	0	1
mir-8200-3p	0	1
mir-8200-5p	0	1
mir-8201-5p	0	1
mir-8202-3p	0	1
mir-8203-3p	0	1
mir-8203-5p	0	1
mir-8204-3p	0	1
mir-8204-5p	0	1
mir-8205-3p	0	1
mir-8205-5p	0	1
mir-8206-3p	0	1
mir-8206-5p	0	1
mir-8207-3p	0	1
mir-8207-5p	0	1
mir-8208-3p	0	1
mir-8208-5p	0	1
mir-8209-3p	0	1
mir-8209-5p	0	1
mir-8210-3p	0	1
mir-8210-5p	0	1
mir-8211-5p	0	1
mir-8212-3p	0	1
mir-8212-5p	0	1
mir-83-5p	0	1
mir-84-3p	0	1
mir-85-5p	0	1
