# Supplementary material for: Soma-to-Germline miRNA inheritance via Yolk Promotes Stress Resilience in Progeny
Source: Research Square preprint supplement (doi:10.21203/rs.3.rs-4711258/v1), 2025-07-09
Supplement: Supplementary file 2 [file 5a6eb206c2e55bc9831068e0.xlsx]

## Sheet: L1 RNA-seq DP degron
Supplementary Table 4. DE protein-coding genes in L1 larvae RNA sequencing experiments.
gene	baseMean	log2FoldChange	pvalue	padj	status	cosmid	name
WBGene00022277	290.736	-0.100344	0.539297	0.873939	NS	Y74C9A.3	homt-1
WBGene00022276	3395.3	-0.0371614	0.700884	0.934289	NS	Y74C9A.2	nlp-40
WBGene00022278	766.346	-0.043383	0.679105	0.924376	NS	Y74C9A.4	rcor-1
WBGene00022279	2818.76	-0.0606967	0.51326	0.861372	NS	Y74C9A.5	sesn-1
WBGene00022275	40.3393	-0.329727	0.103872	0.487484	NS	Y74C9A.1	Y74C9A.1
WBGene00044345	182.868	-0.0691424	0.671407	0.922364	NS	Y48G1C.12	Y48G1C.12
WBGene00021677	237.551	-0.142162	0.331467	0.753534	NS	Y48G1C.4	pgs-1
WBGene00021678	30.1743	0.483982	0.0163713	0.174283	NS	Y48G1C.5	Y48G1C.5
WBGene00000812	1529.54	0.0127529	0.880481	0.975996	NS	Y48G1C.2	csk-1
WBGene00021683	1221.24	-0.0129658	0.885895	0.976226	NS	Y48G1C.10	Y48G1C.10
WBGene00021679	171.654	-0.145719	0.369106	0.780453	NS	Y48G1C.6	Y48G1C.6
WBGene00021682	123.523	-0.00366979	0.984245	0.997589	NS	Y48G1C.9	Y48G1C.9
WBGene00021676	265.869	0.0822125	0.574934	0.889432	NS	Y48G1C.1	Y48G1C.1
WBGene00189949	20.2579	0.108827	0.582152	NA	NS	Y48G1C.13	Y48G1C.13
WBGene00021681	2236.85	-0.322666	0.00181545	0.0382196	down	Y48G1C.8	Y48G1C.8
WBGene00004274	4009.13	-0.0998924	0.213651	0.649775	NS	F53G12.1	rab-11.1
WBGene00004418	67641.3	-0.195814	0.0287293	0.248109	NS	F53G12.10	rpl-7
WBGene00018774	46.4008	0.146493	0.467501	0.841988	NS	F53G12.9	F53G12.9
WBGene00018773	5.5262	-0.0847921	0.52901	NA	NS	F53G12.8	F53G12.8
WBGene00000622	5.84623	0.000391511	0.99775	NA	NS	F53G12.7	col-45
WBGene00004962	5.38833	-0.0571018	0.656894	NA	NS	F53G12.6	spe-8
WBGene00003229	861.957	0.135211	0.20934	0.647881	NS	F53G12.5	mex-3
WBGene00018772	57.7477	-0.0282636	0.886362	0.976226	NS	F53G12.4	F53G12.4
WBGene00018771	64.5873	-0.128372	0.518976	0.863663	NS	F53G12.3	duox-2
WBGene00000253	2027.21	-0.00464668	0.957121	0.991981	NS	F56C11.1	bli-3
WBGene00004225	1090.3	0.0965837	0.423071	0.813734	NS	F56C11.2	ptr-11
WBGene00018958	487.56	-0.303113	0.00675645	0.0976753	NS	F56C11.6	F56C11.6
WBGene00018957	252.235	-0.0102925	0.943708	0.989181	NS	F56C11.5	F56C11.5
WBGene00018955	192.312	-0.218367	0.190217	0.625678	NS	F56C11.3	F56C11.3
WBGene00000227	3147.7	-0.344056	9.16562e-05	0.00382743	down	Y48G1BL.2	atm-1
WBGene00021666	107.007	0.0739214	0.683902	0.927013	NS	Y48G1BL.7	Y48G1BL.7
WBGene00021662	76.5228	0.201029	0.297368	0.72494	NS	Y48G1BL.1	snpc-3.3
WBGene00021671	470.468	0.0502173	0.668599	0.920868	NS	Y48G1BM.6	Y48G1BM.6
WBGene00021672	3.55073	0.0656683	0.562544	NA	NS	Y48G1BM.7	Y48G1BM.7
WBGene00021667	38.6234	-0.0932937	0.645709	0.911731	NS	Y48G1BM.1	snpc-3.2
WBGene00021675	223.893	0.196075	0.252792	0.685395	NS	Y48G1BR.1	Y48G1BR.1
WBGene00016904	95.1781	0.0230784	0.903173	0.979825	NS	C53D5.3	C53D5.3
WBGene00016903	615.349	0.236129	0.10105	0.481954	NS	C53D5.2	2004-03-01
WBGene00016905	429.824	0.0371613	0.761572	0.95059	NS	C53D5.4	ztf-3
WBGene00016902	2286.97	0.101214	0.28816	0.717104	NS	C53D5.1	C53D5.1
WBGene00016906	1569.46	0.124401	0.227984	0.662969	NS	C53D5.5	C53D5.5
WBGene00002077	16343.7	0.211552	0.00814062	0.111134	NS	C53D5.6	imb-3
WBGene00002079	1367.98	-0.126208	0.253404	0.685395	NS	Y48G1A.5	xpo-2
WBGene00021660	1550.46	0.120435	0.240864	0.676535	NS	Y48G1A.4	Y48G1A.4
WBGene00000917	382.54	-0.125165	0.329407	0.751509	NS	Y48G1A.3	daf-25
WBGene00021661	88.5811	-0.175903	0.340342	0.760453	NS	Y48G1A.6	mbtr-1
WBGene00021658	26.1009	-0.301211	0.134186	0.542698	NS	Y48G1A.2	Y48G1A.2
WBGene00021657	288.516	-0.0790492	0.583427	0.892408	NS	Y48G1A.1	Y48G1A.1
WBGene00020091	127.995	0.00874132	0.959492	0.992989	NS	R119.7	rnp-8
WBGene00020088	510.382	-0.427068	0.0005694	0.0158352	down	R119.2	R119.2
WBGene00020089	516.551	-0.491324	0.000328383	0.010571	down	R119.3	R119.3
WBGene00004143	7283.1	-0.184095	0.0267568	0.237528	NS	R119.4	pqn-59
WBGene00006385	543.666	0.0124203	0.919686	0.984424	NS	R119.6	taf-4
WBGene00020090	829.587	-0.0584771	0.618842	0.903544	NS	R119.5	R119.5
WBGene00021733	1590.41	0.079708	0.351399	0.767433	NS	Y50C1A.1	otub-2
WBGene00021734	152.028	0.109189	0.498801	0.85572	NS	Y50C1A.2	Y50C1A.2
WBGene00015570	215.334	0.0514575	0.754221	0.948525	NS	C07F11.2	C07F11.2
WBGene00006593	6194.92	-0.0116522	0.866502	0.97395	NS	C07F11.1	tol-1
WBGene00021026	127.275	-0.143358	0.422835	0.813696	NS	W04C9.4	W04C9.4
WBGene00021027	152.669	0.119634	0.484154	0.848192	NS	W04C9.5	W04C9.5
WBGene00021025	17.1043	-0.0379492	0.844959	NA	NS	W04C9.3	cutl-13
WBGene00235388	1.5287	0.0261947	0.728173	NA	NS	W04C9.9	W04C9.9
WBGene00021028	21.1516	-0.171002	0.388703	NA	NS	W04C9.6	W04C9.6
WBGene00021024	857.537	-0.18556	0.10919	0.499257	NS	W04C9.2	W04C9.2
WBGene00001814	6254.67	-0.208318	0.0343052	0.274671	NS	W04C9.1	haf-4
WBGene00022035	20.3838	0.206788	0.285068	NA	NS	Y65B4BL.3	Y65B4BL.3
WBGene00022036	43.3956	-0.197108	0.331371	0.753534	NS	Y65B4BL.4	Y65B4BL.4
WBGene00022034	276.572	-0.16622	0.317503	0.740273	NS	Y65B4BL.2	deps-1
WBGene00022039	56.7772	-0.076422	0.704221	0.935218	NS	Y65B4BL.7	Y65B4BL.7
WBGene00022037	6218.03	-0.222275	0.0107189	0.132915	NS	Y65B4BL.5	acs-13
WBGene00022038	1.74733	0.00843301	0.928419	NA	NS	Y65B4BL.6	Y65B4BL.6
WBGene00022033	65.8157	-0.193114	0.331957	0.753534	NS	Y65B4BL.1	Y65B4BL.1
WBGene00022043	26.6227	-0.411046	0.040534	0.299738	NS	Y65B4BR.8	psf-3
WBGene00022042	19667.3	-0.107625	0.145213	0.563233	NS	Y65B4BR.5	icd-2
WBGene00007009	7380.87	0.000214871	0.997424	0.998992	NS	Y65B4BR.4	wwp-1
WBGene00004235	3895.29	-0.24045	0.00177571	0.0376586	down	Y65B4BR.3	ptr-21
WBGene00002393	11.6959	-0.31928	0.0698853	NA	NS	Y65B4BR.2	lpr-1
WBGene00022040	383.557	0.4026	0.0027853	0.0521056	NS	Y65B4BR.1	Y65B4BR.1
WBGene00000434	31.3735	0.148399	0.45408	0.834549	NS	Y65B4BR.9	ceh-9
WBGene00001725	23.3209	0.146512	0.455651	NA	NS	Y65B4BR.6	grl-16
WBGene00044427	5.00664	-0.0689509	0.607077	NA	NS	F56A6.5	F56A6.5
WBGene00235390	2.58177	-0.012849	0.903205	NA	NS	F56A6.8	F56A6.8
WBGene00002040	5837.09	0.0851894	0.298334	0.725438	NS	F56A6.2	hum-7
WBGene00018923	828.915	-0.135102	0.313975	0.737367	NS	F56A6.4	eme-1
WBGene00018921	614.398	-0.141868	0.347941	0.765709	NS	F56A6.1	sago-2
WBGene00022028	37.114	0.0560125	0.782281	0.95568	NS	Y65B4A.4	Y65B4A.4
WBGene00022029	1537	0.0570851	0.494737	0.853524	NS	Y65B4A.6	Y65B4A.6
WBGene00022027	268.476	-0.209441	0.164249	0.595213	NS	Y65B4A.3	vps-20
WBGene00022026	1920.85	0.00295249	0.980513	0.996621	NS	Y65B4A.2	Y65B4A.2
WBGene00022030	75.048	-0.0612681	0.751862	0.948164	NS	Y65B4A.7	Y65B4A.7
WBGene00022025	205.86	0.006217	0.967231	0.994813	NS	Y65B4A.1	Y65B4A.1
WBGene00022031	345.566	-0.264651	0.0433146	0.310429	NS	Y65B4A.8	Y65B4A.8
WBGene00022032	4.03286	-0.06581	0.598475	NA	NS	Y65B4A.9	Y65B4A.9
WBGene00044461	8.86112	-0.129905	0.440242	NA	NS	Y18H1A.14	Y18H1A.14
WBGene00021215	90.9173	0.0945871	0.615163	0.902684	NS	Y18H1A.11	Y18H1A.11
WBGene00021214	60.4723	0.113736	0.567222	0.886949	NS	Y18H1A.10	Y18H1A.10
WBGene00021207	16.6205	-0.115745	0.529027	NA	NS	Y18H1A.1	Y18H1A.1
WBGene00021210	439.191	-0.210038	0.112171	0.504015	NS	Y18H1A.4	Y18H1A.4
WBGene00021208	175.217	-0.200016	0.215197	0.650097	NS	Y18H1A.2	Y18H1A.2
WBGene00021209	2841.61	-0.165918	0.0378349	0.288315	NS	Y18H1A.3	hgap-1
WBGene00021211	147.374	-0.0933537	0.571847	0.887748	NS	WBGene00021211	Y18H1A.7
WBGene00004028	136.804	-0.139017	0.438917	0.824989	NS	Y18H1A.6	pif-1
WBGene00044434	19.8822	-0.041996	0.820612	NA	NS	Y18H1A.15	Y18H1A.15
WBGene00236789	14.7089	0.226438	0.21916	NA	NS	Y18H1A.18	Y18H1A.18
WBGene00000623	3.27963	0.0904667	0.407063	NA	NS	Y18H1A.13	col-46
WBGene00000624	5.81175	0.160411	0.242726	NA	NS	Y18H1A.12	col-47
WBGene00021213	55.7616	0.0118886	0.952205	0.990569	NS	Y18H1A.9	Y18H1A.9
WBGene00021212	3.66664	0.0177027	0.880269	NA	NS	Y18H1A.8	Y18H1A.8
WBGene00020282	2.88176	-0.0233883	0.83369	NA	NS	T06A4.2	mps-3
WBGene00020283	122.326	-0.190622	0.277363	0.704932	NS	T06A4.3	T06A4.3
WBGene00020281	33.8809	-0.0179027	0.929642	0.987145	NS	T06A4.1	T06A4.1
WBGene00022518	11940.1	0.148645	0.162242	0.591916	NS	ZC123.3	zfh-2
WBGene00022517	144.939	0.0780485	0.638263	0.910288	NS	ZC123.1	ZC123.1
WBGene00022519	2139.33	0.128952	0.156403	0.581788	NS	ZC123.4	ZC123.4
WBGene00022388	1633.97	-0.104447	0.208192	0.647323	NS	Y95B8A.8	Y95B8A.8
WBGene00022389	8136.7	0.116382	0.1146	0.507971	NS	Y95B8A.10	pde-6
WBGene00022386	1223.47	0.216659	0.0475196	0.326014	NS	Y95B8A.6	Y95B8A.6
WBGene00022390	157.82	0.0641496	0.708961	0.936326	NS	Y95B8A.11	him-19
WBGene00001678	374.734	0.051644	0.695277	0.931419	NS	Y95B8A.5	gpa-16
WBGene00022385	29.7734	0.204834	0.309571	0.734744	NS	Y95B8A.4	Y95B8A.4
WBGene00022391	2769.45	0.230428	0.0621981	0.380985	NS	Y95B8A.12	Y95B8A.12
WBGene00022383	414.811	0.168315	0.235503	0.671132	NS	Y95B8A.2	Y95B8A.2
WBGene00003548	225.019	0.00360238	0.980499	0.996621	NS	Y95B8A.1	nas-30
WBGene00003238	2369.68	-0.118246	0.187791	0.623413	NS	Y34D9B.1	mig-1
WBGene00018787	1064.62	0.146329	0.204596	0.642702	NS	F54A5.2	cutl-20
WBGene00018788	765.731	-0.0631235	0.534321	0.870936	NS	F54A5.3	shc-1
WBGene00018786	143.19	0.0275156	0.875792	0.97512	NS	F54A5.1	hmbx-1
WBGene00016932	843.691	0.0983479	0.474212	0.844857	NS	C54G6.3	C54G6.3
WBGene00016931	159.692	0.00712557	0.970939	0.994949	NS	C54G6.2	C54G6.2
WBGene00016930	24.0715	-0.00455805	0.981726	NA	NS	C54G6.1	madf-6
WBGene00236808	2.15664	-0.0182478	0.859794	NA	NS	C54G6.8	C54G6.8
WBGene00005002	149.06	-1.22105	1.25546e-11	2.97081e-09	down1	C54G6.5	spp-17
WBGene00021335	207.064	0.0201128	0.903466	0.980002	NS	Y34D9A.11	spp-23
WBGene00021327	1752.12	-0.19203	0.0417937	0.304381	NS	Y34D9A.1	mrpl-38
WBGene00004952	242.225	-0.378844	0.00854825	0.114936	NS	Y34D9A.4	spd-1
WBGene00021329	309.097	-0.0322335	0.835831	0.967426	NS	Y34D9A.3	Y34D9A.3
WBGene00021332	159.265	-0.14078	0.372741	0.783454	NS	Y34D9A.7	Y34D9A.7
WBGene00021331	799.102	-0.184601	0.0881971	0.45157	NS	Y34D9A.6	glrx-10
WBGene00021333	404.156	0.0846069	0.471636	0.84425	NS	Y34D9A.8	Y34D9A.8
WBGene00021334	3611.88	0.0275373	0.702371	0.935212	NS	Y34D9A.10	vps-4
WBGene00021328	1067.18	0.0921413	0.314234	0.737367	NS	Y34D9A.2	npr-23
WBGene00001745	9475.06	-0.0443622	0.557762	0.882578	NS	R06A10.2	gsa-1
WBGene00019909	122.578	-0.0473782	0.80447	0.960919	NS	R06A10.1	R06A10.1
WBGene00044895	59.7245	0.265108	0.17561	0.610628	NS	R06A10.5	R06A10.5
WBGene00019911	694.122	0.153627	0.197147	0.634399	NS	R06A10.4	R06A10.4
WBGene00022838	203.828	0.033657	0.831929	0.967426	NS	ZK993.2	ZK993.2
WBGene00236809	44.2928	0.209906	0.301159	0.727761	NS	ZK993.5	ZK993.5
WBGene00022837	137.472	0.127383	0.508451	0.860015	NS	ZK993.1	ceh-45
WBGene00021689	1184.77	-0.0632671	0.513073	0.861241	NS	Y48G8AL.10	Y48G8AL.10
WBGene00000165	299.002	0.154855	0.267617	0.697107	NS	Y48G8AL.14	aps-3
WBGene00004429	36714.4	-0.173739	0.0555045	0.356813	NS	Y48G8AL.8	rpl-17
WBGene00021687	281.807	0.0967307	0.49628	0.85435	NS	Y48G8AL.7	Y48G8AL.7
WBGene00001816	787.53	-0.363582	0.00138877	0.0310641	down	Y48G8AL.11	haf-6
WBGene00004880	2725.38	-0.0201794	0.795216	0.959559	NS	Y48G8AL.6	smg-2
WBGene00021686	1973.69	0.0202561	0.809051	0.962008	NS	Y48G8AL.5	Y48G8AL.5
WBGene00021685	6039.13	-0.0302578	0.730258	0.942681	NS	Y48G8AL.1	herc-1
WBGene00195068	56.4313	0.0372557	0.852876	0.971852	NS	Y48G8AL.16	Y48G8AL.16
WBGene00021690	8.92232	-0.100207	0.50935	NA	NS	Y48G8AL.12	Y48G8AL.12
WBGene00021691	3949.57	-0.0566554	0.584497	0.892545	NS	Y48G8AL.13	Y48G8AL.13
WBGene00021692	89.8217	0.292078	0.113868	0.506379	NS	Y48G8AL.15	Y48G8AL.15
WBGene00001707	2475.12	0.123182	0.16567	0.596676	NS	Y48G8AR.1	grh-1
WBGene00021693	538.063	0.0843107	0.584799	0.892545	NS	Y48G8AR.2	Y48G8AR.2
WBGene00021694	2.22313	-0.0335563	0.73287	NA	NS	Y48G8AR.3	Y48G8AR.3
WBGene00003400	7404.74	0.128055	0.0355288	0.278774	NS	K12C11.4	dapk-1
WBGene00044896	1.32632	-0.0398735	0.568674	NA	NS	K12C11.5	K12C11.5
WBGene00019674	45.4114	-0.387294	0.0548439	0.354789	NS	K12C11.3	K12C11.3
WBGene00045052	79.2171	-0.262845	0.168482	0.599771	NS	K12C11.6	K12C11.6
WBGene00045053	71.0168	-0.13819	0.48526	0.848812	NS	K12C11.7	K12C11.7
WBGene00004888	630.005	-0.23215	0.120502	0.519314	NS	K12C11.2	smo-1
WBGene00019673	1969.45	-0.308944	0.00113092	0.0270458	down	K12C11.1	K12C11.1
WBGene00022363	889.63	0.0610814	0.556024	0.881689	NS	Y92H12BL.1	Y92H12BL.1
WBGene00022366	1133.55	0.0397233	0.716206	0.938247	NS	Y92H12BL.5	Y92H12BL.5
WBGene00022365	517.944	0.0613448	0.623283	0.905324	NS	Y92H12BL.4	Y92H12BL.4
WBGene00022367	630.278	-0.0322946	0.811571	0.96271	NS	Y92H12BM.1	Y92H12BM.1
WBGene00022372	723.709	-0.133372	0.287582	0.7165	NS	Y92H12BR.7	Y92H12BR.7
WBGene00022371	317.222	-0.0761388	0.576132	0.889829	NS	Y92H12BR.6	set-29
WBGene00022368	294.738	-0.0339336	0.813916	0.963135	NS	Y92H12BR.2	Y92H12BR.2
WBGene00022369	3079.96	-0.109193	0.141093	0.557026	NS	Y92H12BR.3	Y92H12BR.3
WBGene00022373	1027.39	-0.0352017	0.722373	0.939482	NS	Y92H12BR.8	mrpl-15
WBGene00018159	154.236	-0.0385414	0.815059	0.963687	NS	F37F2.2	F37F2.2
WBGene00004969	618.548	-0.0230755	0.853382	0.971852	NS	F47G6.4	spe-15
WBGene00001773	30.9013	-0.192791	0.341658	0.761573	NS	F37F2.3	gst-25
WBGene00018580	3.38619	0.166808	0.156568	NA	NS	F47G6.3	F47G6.3
WBGene00018579	612.26	-0.243713	0.0270447	0.238886	NS	F47G6.2	acs-16
WBGene00001115	1495.3	0.00293652	0.977378	0.995509	NS	F47G6.1	dyb-1
WBGene00022361	3502.58	-0.126077	0.071032	0.406163	NS	Y92H12A.5	Y92H12A.5
WBGene00022360	1352.18	-0.142846	0.109587	0.499853	NS	Y92H12A.4	Y92H12A.4
WBGene00022358	4102.85	0.14202	0.0550853	0.355612	NS	Y92H12A.2	Y92H12A.2
WBGene00005077	1776.77	-0.101289	0.29933	0.725805	NS	Y92H12A.1	src-1
WBGene00022270	736.821	-0.128568	0.226319	0.660735	NS	Y73E7A.3	Y73E7A.3
WBGene00022271	1665.85	0.0450257	0.685347	0.927013	NS	Y73E7A.4	cpx-1
WBGene00022269	715.778	0.141401	0.179372	0.612299	NS	Y73E7A.2	Y73E7A.2
WBGene00022273	180.911	-0.138524	0.391419	0.796495	NS	Y73E7A.6	Y73E7A.6
WBGene00044440	445.709	-0.106455	0.373499	0.784574	NS	Y73E7A.9	adpr-1
WBGene00000269	656.84	-0.0183001	0.875911	0.97512	NS	Y73E7A.7	bre-4
WBGene00022268	487.798	-0.219875	0.0694671	0.401445	NS	Y73E7A.1	Y73E7A.1
WBGene00022274	41.3009	-0.125728	0.535803	0.871762	NS	Y73E7A.8	Y73E7A.8
WBGene00003111	1502.72	-0.0234416	0.830726	0.967268	NS	Y71G12B.20	mab-20
WBGene00022156	3.72858	0.0603093	0.625373	NA	NS	Y71G12B.18	Y71G12B.18
WBGene00004168	240.307	0.150326	0.330142	0.752106	NS	Y71G12B.21	pqn-88
WBGene00044358	2.52069	0.0171018	0.869198	NA	NS	Y71G12B.33	Y71G12B.33
WBGene00022157	40.6696	-0.200375	0.323169	0.745838	NS	Y71G12B.22	Y71G12B.22
WBGene00022155	209.319	-0.169972	0.291985	0.721034	NS	Y71G12B.17	Y71G12B.17
WBGene00022158	324.128	-0.135215	0.323545	0.746234	NS	Y71G12B.23	Y71G12B.23
WBGene00185098	189.556	-0.179687	0.280631	0.707642	NS	Y71G12B.35	Y71G12B.35
WBGene00022154	178.927	-0.246879	0.121861	0.520188	NS	Y71G12B.16	drag-1
WBGene00044348	1013.71	0.0359658	0.704233	0.935218	NS	Y71G12B.31	Y71G12B.31
WBGene00006702	3082.56	-0.00247937	0.978237	0.996034	NS	Y71G12B.15	ubc-3
WBGene00003080	195.225	-0.118038	0.448603	0.831095	NS	Y71G12B.14	lsm-6
WBGene00022153	961.262	0.0960852	0.378749	0.788244	NS	Y71G12B.13	Y71G12B.13
WBGene00022152	614.684	0.0820498	0.443446	0.827962	NS	Y71G12B.12	atg-5
WBGene00006771	20397.5	-0.0639748	0.378358	0.787993	NS	Y71G12B.11	tln-1
WBGene00022159	1051.19	-0.275171	0.019604	0.196448	NS	Y71G12B.24	mppa-1
WBGene00022150	718.904	-0.0958683	0.399203	0.802492	NS	Y71G12B.10	Y71G12B.10
WBGene00022149	1238.26	-0.0488345	0.63309	0.907741	NS	Y71G12B.9	lin-65
WBGene00022148	2560.22	0.0239012	0.753469	0.948376	NS	Y71G12B.8	Y71G12B.8
WBGene00022160	421.064	0.0877165	0.45528	0.835034	NS	Y71G12B.25	Y71G12B.25
WBGene00022161	217.956	-0.477927	0.00137195	0.0308938	down	Y71G12B.26	Y71G12B.26
WBGene00022147	1.00775	0.0181236	0.789752	NA	NS	Y71G12B.7	Y71G12B.7
WBGene00022146	172.004	-0.0836286	0.611451	0.902246	NS	Y71G12B.6	Y71G12B.6
WBGene00022162	3.47604	0.0913649	0.441575	NA	NS	Y71G12B.27	Y71G12B.27
WBGene00022145	37.4469	0.152827	0.448928	0.831179	NS	Y71G12B.5	Y71G12B.5
WBGene00022144	5340.84	0.089116	0.380575	0.788964	NS	Y71G12B.4	pghm-1
WBGene00022143	13.8782	-0.193492	0.293686	NA	NS	Y71G12B.3	Y71G12B.3
WBGene00044349	49.1832	-0.126493	0.532901	0.870539	NS	Y71G12B.32	Y71G12B.32
WBGene00022142	205.654	0.29001	0.0796947	0.430486	NS	Y71G12B.2	Y71G12B.2
WBGene00044347	118.255	0.0643772	0.729731	0.942681	NS	Y71G12B.30	Y71G12B.30
WBGene00022141	226.942	-0.551239	0.00104815	0.0256114	down0.5	Y71G12B.1	chaf-2
WBGene00044746	98.3058	-0.287778	0.121809	0.520188	NS	C53H9.3	C53H9.3
WBGene00016907	3605.93	0.228537	0.012431	0.147863	NS	C53H9.2	C53H9.2
WBGene00004441	21989.3	-0.194544	0.0391764	0.294215	NS	C53H9.1	rpl-27
WBGene00001196	15140.5	0.066027	0.456777	0.835711	NS	M01D7.7	egl-30
WBGene00001309	348.328	-0.0515365	0.699611	0.933737	NS	M01D7.6	emr-1
WBGene00003750	626.624	0.088768	0.592105	0.894624	NS	M01D7.5	nlp-12
WBGene00006461	50.2812	0.022302	0.912478	0.98209	NS	M01D7.4	tag-96
WBGene00044897	1.21917	0	1	NA	NS	M01D7.9	M01D7.9
WBGene00004743	1486.98	0.0400305	0.685389	0.927013	NS	M01D7.2	scm-1
WBGene00022139	6743.54	0.102082	0.207123	0.646548	NS	Y71G12A.3	tub-2
WBGene00022140	11.6091	-0.101087	0.531672	NA	NS	Y71G12A.4	Y71G12A.4
WBGene00022138	3612.47	-0.308544	0.00319772	0.056976	NS	Y71G12A.2	trpp-10
WBGene00021768	2101.22	-0.379412	0.00468103	0.0766234	NS	Y51F10.7	Y51F10.7
WBGene00021766	412.988	0.181171	0.154654	0.580564	NS	Y51F10.5	hex-4
WBGene00021765	765.019	-0.0231213	0.846456	0.970685	NS	Y51F10.4	Y51F10.4
WBGene00255420	2.3905	0.0426647	0.681058	NA	NS	Y51F10.15	Y51F10.15
WBGene00021771	560.041	0.0906169	0.433558	0.821971	NS	Y51F10.10	Y51F10.10
WBGene00044438	420.64	-0.0147756	0.912297	0.98209	NS	Y51F10.11	Y51F10.11
WBGene00021764	928.924	-0.0595641	0.555219	0.881449	NS	Y51F10.3	Y51F10.3
WBGene00021763	93.4204	-0.0618438	0.735884	0.943648	NS	Y51F10.2	Y51F10.2
WBGene00021238	2295.65	0.0132018	0.875211	0.97512	NS	Y20F4.3	gap-3
WBGene00021237	4370.54	0.0676866	0.479108	0.847113	NS	Y20F4.2	crtc-1
WBGene00021239	4493.88	0.0654751	0.493941	0.853373	NS	Y20F4.4	Y20F4.4
WBGene00044435	76.7654	0.0316364	0.868225	0.974342	NS	Y20F4.8	Y20F4.8
WBGene00021346	455.506	-0.103084	0.429755	0.819182	NS	Y37E3.1	Y37E3.1
WBGene00021347	276.406	0.0221333	0.88589	0.976226	NS	Y37E3.3	rpb-10
WBGene00021348	333.269	-0.0566818	0.68797	0.927848	NS	Y37E3.4	moag-4
WBGene00021349	243.268	0.227408	0.11824	0.515748	NS	Y37E3.5	arl-13
WBGene00004409	24692.4	-0.19801	0.0198424	0.197637	NS	Y37E3.7	rla-1
WBGene00021350	23066.9	-0.15926	0.0538744	0.350873	NS	Y37E3.8	Y37E3.8
WBGene00004014	4461.25	-0.443459	0.000105466	0.00422115	down	Y37E3.9	phb-1
WBGene00021351	1993.5	0.0133987	0.876191	0.97512	NS	Y37E3.10	Y37E3.10
WBGene00021352	1829.59	0.0824403	0.328158	0.749778	NS	Y37E3.11	Y37E3.11
WBGene00021353	746.397	0.151648	0.356984	0.772764	NS	Y37E3.13	iglr-3
WBGene00003799	2116.92	-0.0943711	0.270242	0.699678	NS	Y37E3.15	npp-13
WBGene00044810	44.4254	-0.121298	0.549658	0.879921	NS	Y37E3.19	Y37E3.19
WBGene00021354	672.607	-0.0110714	0.929999	0.987145	NS	Y37E3.16	fpn-1.1
WBGene00021355	4768.57	-0.57675	8.29261e-14	2.86797e-11	down0.5	Y37E3.17	Y37E3.17
WBGene00235158	37.4497	-0.0498579	0.806013	0.96174	NS	Y37E3.30	Y37E3.30
WBGene00021009	9398.53	0.0874543	0.209501	0.648107	NS	W03F11.6	afd-1
WBGene00021008	25.3531	0.00305373	0.98758	0.998049	NS	W03F11.5	W03F11.5
WBGene00021005	10.5317	0.077408	0.640544	NA	NS	W03F11.1	W03F11.1
WBGene00001542	111.402	0.0379215	0.837887	0.96743	NS	W03F11.2	gcy-17
WBGene00021006	0.711899	-0.0197521	0.704014	NA	NS	W03F11.3	dct-9
WBGene00021007	7.35343	0.0443448	0.762039	NA	NS	W03F11.4	W03F11.4
WBGene00017399	25.0949	-0.0791973	0.694253	0.931063	NS	F12B6.3	lgc-51
WBGene00017398	959.995	0.0948872	0.472844	0.844843	NS	F12B6.2	slc-17.6
WBGene00000020	6075.37	0.145326	0.0178771	0.184347	NS	F12B6.1	abt-2
WBGene00021458	28.4944	-0.0237849	0.887046	0.976226	NS	Y39G10AL.1	Y39G10AL.1
WBGene00000408	568.177	0.135341	0.219933	0.655528	NS	Y39G10AL.3	cdk-7
WBGene00021469	12598.9	-0.0284921	0.757943	0.949343	NS	Y39G10AR.11	Y39G10AR.11
WBGene00021470	2411.97	-0.0667295	0.532231	0.87018	NS	Y39G10AR.12	tpxl-1
WBGene00021468	1866.39	0.0236744	0.84487	0.969921	NS	Y39G10AR.10	epg-2
WBGene00002047	297.118	-0.488849	0.00500752	0.0799306	NS	Y39G10AR.13	icp-1
WBGene00021467	226.879	-0.301367	0.0665942	0.393267	NS	Y39G10AR.9	Y39G10AR.9
WBGene00021476	434.678	-0.31867	0.0205581	0.202252	NS	Y39G10AR.21	Y39G10AR.21
WBGene00021475	143.388	-0.0748098	0.65552	0.914671	NS	Y39G10AR.20	tbca-1
WBGene00021466	3366.94	-0.0941516	0.191891	0.627724	NS	Y39G10AR.8	Y39G10AR.8
WBGene00021465	73.0688	-0.0728542	0.703298	0.935218	NS	Y39G10AR.7	Y39G10AR.7
WBGene00003156	677.026	-0.621592	0.000426072	0.0129434	down0.5	Y39G10AR.14	mcm-4
WBGene00219275	53.7316	-0.239183	0.23048	0.665821	NS	Y39G10AR.32	Y39G10AR.32
WBGene00021471	21.0044	-0.0780243	0.686452	NA	NS	Y39G10AR.15	Y39G10AR.15
WBGene00021477	11.0318	0.122574	0.48097	NA	NS	Y39G10AR.22	srbc-64
WBGene00021472	1.07358	0	1	NA	NS	Y39G10AR.16	Y39G10AR.16
WBGene00021464	68.1593	0.0214871	0.914583	0.982557	NS	Y39G10AR.6	ugt-31
WBGene00021463	56.7962	-0.360721	0.0755945	0.4184	NS	Y39G10AR.5	zeel-1
WBGene00077563	10.7196	0.155631	0.356832	NA	NS	Y39G10AR.25	peel-1
WBGene00021461	390.043	0.0545053	0.688593	0.927848	NS	Y39G10AR.3	nekl-1
WBGene00021473	1310.7	0.0800549	0.426108	0.817081	NS	Y39G10AR.17	sydn-1
WBGene00021474	5010.03	0.0317945	0.650941	0.913239	NS	Y39G10AR.18	dot-1.1
WBGene00021460	196.658	-0.138715	0.411103	0.806894	NS	Y39G10AR.2	zwl-1
WBGene00017741	1195.34	-0.0198059	0.86873	0.974414	NS	F23C8.13	F23C8.13
WBGene00017734	4007.02	-1.06723	2.55345e-23	1.91339e-20	down1	F23C8.5	F23C8.5
WBGene00017735	1054.58	-0.257285	0.0203299	0.200886	NS	F23C8.6	did-2
WBGene00017736	25.51	-0.288902	0.148135	0.568346	NS	F23C8.7	F23C8.7
WBGene00017737	2.97315	-0.016629	0.879032	NA	NS	F23C8.8	F23C8.8
WBGene00017738	15.4207	-0.0279231	0.87528	NA	NS	F23C8.9	F23C8.9
WBGene00017733	547.495	-0.181512	0.0926151	0.462026	NS	F23C8.4	ubxn-1
WBGene00255457	7.79149	-0.05238	0.741953	NA	NS	F23C8.14	F23C8.14
WBGene00017732	151.397	-0.241211	0.137662	0.549671	NS	F23C8.3	F23C8.3
WBGene00002141	433.99	0.23777	0.0684745	0.399301	NS	T16H5.1	inx-19
WBGene00022280	612.136	-0.170962	0.13248	0.539359	NS	Y74C10AL.2	Y74C10AL.2
WBGene00022281	2426.56	-0.0297192	0.752271	0.948164	NS	Y74C10AR.3	abtm-1
WBGene00022282	45.226	-0.0479691	0.813214	0.963135	NS	Y74C10AR.2	Y74C10AR.2
WBGene00001232	2652.86	-0.0133057	0.87126	0.974432	NS	Y74C10AR.1	eif-3.I
WBGene00021277	1200.37	0.146069	0.182749	0.617621	NS	Y23H5B.6	Y23H5B.6
WBGene00021276	880.832	0.0474525	0.703409	0.935218	NS	Y23H5B.5	Y23H5B.5
WBGene00021275	585.332	0.183434	0.266939	0.696685	NS	Y23H5B.4	dmsr-2
WBGene00021274	24.9693	0.0742502	0.703782	NA	NS	Y23H5B.3	Y23H5B.3
WBGene00021279	4.04258	0.157438	0.217792	NA	NS	Y23H5B.8	Y23H5B.8
WBGene00021280	0.379249	-0.00206046	0.95397	NA	NS	Y23H5B.9	nspd-8
WBGene00021272	163.527	0.315409	0.0756273	0.4184	NS	Y23H5B.1	Y23H5B.1
WBGene00194701	0.0618896	0	1	NA	NS	Y23H5B.12	Y23H5B.12
WBGene00016950	0.062426	0	1	NA	NS	C55C2.4	C55C2.4
WBGene00016949	0.070024	0	1	NA	NS	C55C2.3	C55C2.3
WBGene00006047	0	NA	NA	NA	NS	C55C2.2	ssp-19
WBGene00016948	2.44902	0.0428748	0.662366	NA	NS	C55C2.1	scrt-1
WBGene00000006	4376.93	0.0738766	0.514794	0.862169	NS	C55C2.5	aat-5
WBGene00001404	7736.58	-0.334272	0.0870445	0.447942	NS	K07A3.1	fbp-1
WBGene00004226	2921.27	0.0666175	0.435837	0.82398	NS	K07A3.2	ptr-12
WBGene00019461	11.2279	0.155259	0.371679	NA	NS	K07A3.3	K07A3.3
WBGene00000832	3603.36	0.153965	0.113132	0.505321	NS	Y23H5A.5	ctn-1
WBGene00021271	33.3764	0.168587	0.40498	0.805422	NS	Y23H5A.4	spe-47
WBGene00021270	222.154	-0.194626	0.204041	0.641964	NS	Y23H5A.3	Y23H5A.3
WBGene00021269	200.607	0.00727713	0.962125	0.993315	NS	Y23H5A.2	Y23H5A.2
WBGene00000800	2212.54	-0.0113799	0.903029	0.979825	NS	Y23H5A.7	cars-1
WBGene00023172	33.0641	0.147375	0.436517	0.82398	NS	Y23H5A.8	Y23H5A.8
WBGene00018231	0.758792	-0.0225419	0.677806	NA	NS	F40E3.3	F40E3.3
WBGene00018230	194.518	-0.216589	0.178129	0.612299	NS	F40E3.2	mage-1
WBGene00018232	416.544	0.188916	0.171083	0.604192	NS	F40E3.5	F40E3.5
WBGene00018233	53.4335	0.292986	0.148817	0.570079	NS	F40E3.6	F40E3.6
WBGene00017979	6417.9	0.0775984	0.375581	0.7854	NS	F32B5.6	F32B5.6
WBGene00017980	3529.09	0.128622	0.231894	0.667049	NS	F32B5.7	F32B5.7
WBGene00000788	2346.79	0.0786488	0.475068	0.844989	NS	F32B5.8	cpz-1
WBGene00017978	0.343682	0.0241354	0.368347	NA	NS	F32B5.4	F32B5.4
WBGene00017977	9.27678	-0.172085	0.294801	NA	NS	F32B5.3	F32B5.3
WBGene00017976	345.172	0.0772131	0.576926	0.890262	NS	F32B5.2	F32B5.2
WBGene00017975	1178.54	-0.95947	8.03945e-16	3.61454e-13	down0.5	F32B5.1	F32B5.1
WBGene00003006	1489.98	0.0504333	0.703962	0.935218	NS	Y71F9B.5	lin-17
WBGene00001048	130.919	0.0230757	0.893286	0.977518	NS	Y71F9B.16	dnj-30
WBGene00022128	647.334	0.0241199	0.814394	0.963135	NS	Y71F9B.6	Y71F9B.6
WBGene00004920	615.502	0.0677744	0.591745	0.894624	NS	Y71F9B.4	snr-7
WBGene00022127	3563.35	-0.0516307	0.525945	0.866606	NS	Y71F9B.3	yop-1
WBGene00022126	371.972	-0.1403	0.269738	0.699565	NS	Y71F9B.2	Y71F9B.2
WBGene00022129	1272.87	-0.0685824	0.483371	0.848164	NS	Y71F9B.8	lron-11
WBGene00004043	78.7046	0.0351748	0.858939	0.973185	NS	Y71F9B.7	plk-2
WBGene00022130	41.2353	-0.289943	0.152118	0.576335	NS	Y71F9B.9	Y71F9B.9
WBGene00004946	3585.83	0.0166109	0.829326	0.966974	NS	Y71F9B.10	sop-3
WBGene00022125	466.311	0.138098	0.319033	0.742575	NS	Y71F9B.1	Y71F9B.1
WBGene00022131	1327.08	0.190782	0.121763	0.520188	NS	Y71F9B.13	Y71F9B.13
WBGene00022133	0.68373	0.0098161	0.831298	NA	NS	Y71F9B.15	Y71F9B.15
WBGene00020990	0.640947	-0.014888	0.718019	NA	NS	W03D8.9	W03D8.9
WBGene00255550	0	NA	NA	NA	NS	W03D8.14	W03D8.14
WBGene00020984	2.51887	0.0193797	0.83582	NA	NS	W03D8.1	W03D8.1
WBGene00020989	414.552	-0.308107	0.0239006	0.221469	NS	W03D8.8	W03D8.8
WBGene00020988	2.37801	-0.115313	0.240528	NA	NS	W03D8.7	W03D8.7
WBGene00020985	59.7083	0.22762	0.244617	0.679028	NS	W03D8.2	W03D8.2
WBGene00002174	7597.86	-0.0645216	0.509865	0.860692	NS	W03D8.6	itx-1
WBGene00020987	0.880574	0.0130394	0.808577	NA	NS	W03D8.5	W03D8.5
WBGene00044796	0.551135	0.0345262	0.379828	NA	NS	W03D8.11	W03D8.11
WBGene00020986	28.2599	0.05182	0.797854	0.959823	NS	W03D8.3	W03D8.3
WBGene00004077	649.868	-0.161763	0.21415	0.649775	NS	W10C8.2	pop-1
WBGene00021126	16.8182	-0.0359468	0.848147	NA	NS	W10C8.3	W10C8.3
WBGene00021125	97.0694	-0.0887116	0.637863	0.910145	NS	W10C8.1	ccb-2
WBGene00021127	280.729	0.113746	0.483491	0.848164	NS	W10C8.4	W10C8.4
WBGene00021128	2789.46	-0.992558	3.08991e-21	2.19351e-18	down0.5	W10C8.5	W10C8.5
WBGene00044433	212.082	0.137917	0.424228	0.81485	NS	W10C8.6	W10C8.6
WBGene00022116	127.384	0.061863	0.713559	0.937546	NS	Y71F9AL.11	Y71F9AL.11
WBGene00022115	1505.3	-0.0317881	0.731376	0.942681	NS	Y71F9AL.10	Y71F9AL.10
WBGene00022117	193.765	0.101972	0.537566	0.873051	NS	Y71F9AL.12	Y71F9AL.12
WBGene00004412	46796.7	-0.250911	0.00260615	0.0496185	down	Y71F9AL.13	rpl-1
WBGene00022114	4055.96	0.0952926	0.193496	0.629888	NS	Y71F9AL.9	Y71F9AL.9
WBGene00022113	87.5905	0.141225	0.460886	0.837929	NS	Y71F9AL.8	Y71F9AL.8
WBGene00022118	201.324	-0.036964	0.818438	0.963687	NS	Y71F9AL.14	dnc-5
WBGene00000199	2069.91	-0.0673098	0.366931	0.779047	NS	Y71F9AL.16	arx-1
WBGene00022112	161.183	0.218296	0.211675	0.649144	NS	Y71F9AL.7	Y71F9AL.7
WBGene00022111	118.171	-0.100667	0.57733	0.890262	NS	Y71F9AL.6	Y71F9AL.6
WBGene00022119	4690.5	-0.0294267	0.720361	0.938916	NS	Y71F9AL.17	copa-1
WBGene00001791	216.585	-0.159706	0.319244	0.742575	NS	Y71F9AL.5	gst-43
WBGene00022110	66.4843	-0.136687	0.480301	0.847414	NS	Y71F9AL.4	Y71F9AL.4
WBGene00004049	782.491	-0.339393	0.00123812	0.028493	down	Y71F9AL.18	pme-1
WBGene00022108	90.5927	-0.154012	0.411224	0.806894	NS	Y71F9AL.2	Y71F9AL.2
WBGene00022107	330.381	0.00585672	0.969221	0.994813	NS	Y71F9AL.1	Y71F9AL.1
WBGene00022122	2024.49	0.0706265	0.522036	0.865753	NS	Y71F9AM.6	trap-1
WBGene00003836	273.792	-0.0654992	0.650852	0.913239	NS	Y71F9AM.5	nxt-1
WBGene00022121	1284.39	6.69642e-05	0.999443	0.999871	NS	Y71F9AM.4	cogc-3
WBGene00045398	22.385	-0.0396257	0.840608	NA	NS	Y71F9AM.8	Y71F9AM.8
WBGene00000237	2846.97	-0.046462	0.588692	0.893734	NS	Y71F9AR.1	bam-2
WBGene00044894	77.2246	0.0697088	0.712031	0.937035	NS	Y71F9AR.4	Y71F9AR.4
WBGene00022123	56.4513	-0.244865	0.221914	0.657629	NS	Y71F9AR.2	Y71F9AR.2
WBGene00022124	497.247	-0.117173	0.308821	0.734744	NS	Y71F9AR.3	supr-1
WBGene00001046	274.593	0.183987	0.197958	0.634399	NS	Y54E10BL.4	dnj-28
WBGene00021839	998.617	-0.112324	0.29886	0.72568	NS	Y54E10BL.5	nduf-5
WBGene00021838	566.397	0.0506407	0.623725	0.90549	NS	Y54E10BL.3	Y54E10BL.3
WBGene00003186	2388.93	-0.0517793	0.518197	0.86332	NS	Y54E10BL.6	mek-2
WBGene00000625	125.838	-0.0919455	0.629234	0.90664	NS	Y54E10BL.2	col-48
WBGene00021837	66.1161	-0.143471	0.460698	0.837929	NS	Y54E10BL.1	Y54E10BL.1
WBGene00021843	3533.75	0.195174	0.00645209	0.0946961	NS	Y54E10BR.4	Y54E10BR.4
WBGene00021842	977.931	-0.0248194	0.801362	0.960509	NS	Y54E10BR.3	Y54E10BR.3
WBGene00021844	695.574	0.0520128	0.660145	0.916967	NS	Y54E10BR.5	Y54E10BR.5
WBGene00021845	441.938	0.0753297	0.57077	0.887503	NS	Y54E10BR.6	rpb-7
WBGene00021841	211.325	-0.217151	0.155279	0.580813	NS	Y54E10BR.2	Y54E10BR.2
WBGene00003387	773.666	-0.0591756	0.65704	0.915323	NS	Y54E10BR.7	mod-5
WBGene00021846	203.284	-0.0342087	0.820997	0.963757	NS	Y54E10BR.8	ztf-23
WBGene00021840	498.536	0.0158254	0.890776	0.976697	NS	Y54E10BR.1	Y54E10BR.1
WBGene00000205	363.573	-0.135016	0.312562	0.736404	NS	M01B12.3	arx-7
WBGene00019697	3335.51	0.0309996	0.651414	0.913239	NS	M01B12.4	M01B12.4
WBGene00019698	3419.51	0.0632931	0.421636	0.813129	NS	M01B12.5	riok-1
WBGene00003654	715.66	0.0227501	0.844471	0.969692	NS	C45E1.1	nhr-64
WBGene00195056	17.3365	-0.147199	0.422601	NA	NS	C45E1.5	C45E1.5
WBGene00016663	908.905	-0.0473763	0.630923	0.906657	NS	C45E1.4	C45E1.4
WBGene00219460	12.5819	0.100371	0.5807	NA	NS	K09H9.9	K09H9.9
WBGene00000626	32.3777	0.1463	0.470609	0.843867	NS	K09H9.3	col-49
WBGene00045387	2620.59	0.16738	0.226153	0.660678	NS	K09H9.8	K09H9.8
WBGene00019597	535.824	0.0385563	0.747208	0.947391	NS	K09H9.5	K09H9.5
WBGene00003062	1183.99	0.364447	0.000191015	0.0067845	up	K09H9.6	lpd-6
WBGene00019595	67.6039	-0.222525	0.267047	0.696699	NS	K09H9.2	K09H9.2
WBGene00019598	80.2508	0.0378651	0.841833	0.968915	NS	K09H9.7	K09H9.7
WBGene00019594	2.03645	0.0234798	0.795276	NA	NS	K09H9.1	K09H9.1
WBGene00006888	5580.55	-0.180893	0.0767164	0.42063	NS	Y54E10A.9	vbh-1
WBGene00021829	472.019	-0.174266	0.14712	0.566598	NS	Y54E10A.7	mrpl-17
WBGene00021828	835.669	0.0870132	0.406934	0.805489	NS	Y54E10A.6	Y54E10A.6
WBGene00021827	237.755	0.0213815	0.890816	0.976697	NS	Y54E10A.5	dnc-6
WBGene00021830	1086.59	0.167623	0.159255	0.587055	NS	Y54E10A.10	Y54E10A.10
WBGene00021831	1731.41	-0.144763	0.0918585	0.460092	NS	Y54E10A.11	Y54E10A.11
WBGene00021832	103.048	-0.0470245	0.79723	0.959823	NS	Y54E10A.12	Y54E10A.12
WBGene00021833	16.4885	0.0281622	0.879527	NA	NS	Y54E10A.13	Y54E10A.13
WBGene00021835	1279.63	0.0186406	0.862107	0.973185	NS	Y54E10A.17	Y54E10A.17
WBGene00001481	114.9	-0.0143424	0.938256	0.988302	NS	Y54E10A.4	fog-1
WBGene00004404	395.088	-0.0384652	0.758494	0.949444	NS	Y54E10A.14	rom-5
WBGene00000413	249.869	-0.32657	0.0654389	0.388827	NS	Y54E10A.15	cdt-1
WBGene00021826	470.025	-0.100957	0.431086	0.820193	NS	Y54E10A.3	txl-1
WBGene00003258	3876.03	-0.124718	0.141405	0.557355	NS	Y54E10A.2	cogc-1
WBGene00021834	2518.58	-0.108899	0.309084	0.734744	NS	Y54E10A.16	mab-31
WBGene00021553	14.9149	0.00819966	0.965116	NA	NS	Y44E3B.2	tyr-5
WBGene00021552	500.649	0.104422	0.36078	0.773916	NS	Y44E3B.1	zip-4
WBGene00020915	9305.47	0.166436	0.119923	0.519134	NS	W01B11.3	nol-5
WBGene00004154	1877.43	0.169927	0.0912976	0.458801	NS	W01B11.5	pqn-72
WBGene00020914	51.1599	-0.173995	0.384315	0.791987	NS	W01B11.2	sulp-6
WBGene00020917	1211.02	-0.212985	0.0537366	0.350483	NS	W01B11.6	W01B11.6
WBGene00020913	15.8235	-0.20091	0.282038	NA	NS	W01B11.1	W01B11.1
WBGene00000036	3976.12	0.0845384	0.229032	0.663483	NS	Y44E3A.2	ace-2
WBGene00021548	203.045	0.192717	0.250376	0.684807	NS	Y44E3A.3	trx-4
WBGene00021549	2412.62	0.0635929	0.479659	0.84721	NS	Y44E3A.4	Y44E3A.4
WBGene00021547	38.7102	0.0751019	0.711209	0.937035	NS	Y44E3A.1	Y44E3A.1
WBGene00021551	2318.86	-0.0404344	0.597024	0.896732	NS	Y44E3A.6	Y44E3A.6
WBGene00021039	746.939	0.163944	0.271072	0.70008	NS	W05F2.7	W05F2.7
WBGene00195045	13.7314	0.211553	0.254181	NA	NS	W05F2.8	W05F2.8
WBGene00021034	25.2236	0.178454	0.375393	0.785312	NS	W05F2.2	enu-3.4
WBGene00021035	19.0875	-0.198338	0.301589	NA	NS	W05F2.3	W05F2.3
WBGene00021038	101.522	0.0574966	0.756418	0.949096	NS	W05F2.6	W05F2.6
WBGene00021037	61.6876	-0.15861	0.420355	0.81275	NS	W05F2.5	fbxa-203
WBGene00021036	7877.64	0.192607	0.0130638	0.152295	NS	W05F2.4	W05F2.4
WBGene00019362	434.297	-0.231864	0.0689138	0.400133	NS	K03E5.3	cdk-2
WBGene00019361	987.283	-0.169754	0.14737	0.566949	NS	K03E5.2	K03E5.2
WBGene00019360	361.522	0.0669588	0.614796	0.902684	NS	K03E5.1	neto-1
WBGene00004775	305.475	-0.220169	0.120819	0.519314	NS	Y47G6A.12	2001-09-01
WBGene00006440	316.011	-0.303951	0.0419258	0.304685	NS	Y47G6A.28	tag-63
WBGene00021639	108.419	-0.323302	0.0793069	0.429842	NS	Y47G6A.13	Y47G6A.13
WBGene00003422	423.22	-0.441427	0.0039111	0.0666972	NS	Y47G6A.11	msh-6
WBGene00021640	682.313	-0.353874	0.00243566	0.0476119	down	Y47G6A.14	Y47G6A.14
WBGene00004978	4228.29	-0.394642	0.000156814	0.00582674	down	Y47G6A.10	spg-7
WBGene00021641	195.827	0.0468655	0.773055	0.952772	NS	Y47G6A.15	Y47G6A.15
WBGene00021638	114.285	-0.128703	0.457411	0.83587	NS	Y47G6A.9	Y47G6A.9
WBGene00000794	217.94	-0.134541	0.419413	0.811913	NS	Y47G6A.8	crn-1
WBGene00021643	242.104	0.27345	0.0876202	0.449875	NS	Y47G6A.17	Y47G6A.17
WBGene00021637	1228.21	0.026843	0.757189	0.949248	NS	Y47G6A.7	Y47G6A.7
WBGene00021644	1571.97	-0.0242389	0.78522	0.956389	NS	Y47G6A.18	Y47G6A.18
WBGene00021636	568.979	-0.131852	0.200308	0.637207	NS	Y47G6A.6	pcaf-1
WBGene00021645	5596.25	-0.0422233	0.621541	0.904645	NS	Y47G6A.19	Y47G6A.19
WBGene00021653	141.62	-0.0633158	0.706598	0.936036	NS	Y47G6A.30	Y47G6A.30
WBGene00021635	1713.7	0.174785	0.105281	0.490005	NS	Y47G6A.5	Y47G6A.5
WBGene00004389	943.53	-0.0252614	0.782766	0.95568	NS	Y47G6A.20	rnp-6
WBGene00021634	744.669	-0.101162	0.287248	0.716156	NS	Y47G6A.4	rde-10
WBGene00021646	1202.45	-0.474984	2.76666e-07	2.78483e-05	down	Y47G6A.21	Y47G6A.21
WBGene00021647	1481.21	-1.198	9.57598e-21	6.15051e-18	down1	Y47G6A.22	Y47G6A.22
WBGene00045399	36.3288	-0.064832	0.749506	0.948081	NS	Y47G6A.33	Y47G6A.33
WBGene00003060	3314.99	-0.122628	0.0860981	0.445109	NS	Y47G6A.23	lpd-3
WBGene00021652	4864.33	-0.11445	0.0797829	0.430736	NS	WBGene00021652	Y47G6A.29
WBGene00021633	6.26709	0.118325	0.403743	NA	NS	Y47G6A.3	Y47G6A.3
WBGene00044436	10.704	0.172188	0.245692	NA	NS	Y47G6A.31	Y47G6A.31
WBGene00021648	20.6221	-0.442652	0.0222315	NA	NS	Y47G6A.24	mis-12
WBGene00021649	25.2635	-0.0026493	0.989449	0.998864	NS	Y47G6A.25	Y47G6A.25
WBGene00002144	28.9717	0.12733	0.529511	0.868398	NS	Y47G6A.2	inx-22
WBGene00002143	49.3893	-0.228365	0.259319	0.689745	NS	Y47G6A.1	inx-21
WBGene00021650	2.01785	-0.0107261	0.906319	NA	NS	Y47G6A.26	Y47G6A.26
WBGene00044437	113.639	0.0377064	0.837026	0.96743	NS	Y47G6A.32	Y47G6A.32
WBGene00000284	1846.54	0.0818988	0.527084	0.86699	NS	T28F2.3	cah-6
WBGene00020902	742.042	0.0605257	0.567202	0.886949	NS	T28F2.4	jmjc-1
WBGene00020901	230.938	-0.254672	0.0917144	0.460038	NS	T28F2.2	T28F2.2
WBGene00020900	30.3063	-0.0953785	0.627497	0.906092	NS	T28F2.1	T28F2.1
WBGene00000368	3185.88	0.0486907	0.601201	0.897343	NS	T28F2.5	ccb-1
WBGene00000627	1.43381	-0.00719678	0.921031	NA	NS	T28F2.6	col-50
WBGene00000628	8.52394	0.300371	0.05342	NA	NS	T28F2.8	col-51
WBGene00020903	221.822	-0.222984	0.149121	0.570594	NS	T28F2.7	acd-5
WBGene00004890	2452.09	0.0101503	0.929019	0.987103	NS	D1037.2	smp-2
WBGene00001501	6165.6	-0.812093	7.56442e-17	4.08116e-14	down0.5	D1037.3	ftn-2
WBGene00004272	996.615	-0.189949	0.0814164	0.434393	NS	D1037.4	rab-8
WBGene00017025	629.28	-0.165077	0.172594	0.607464	NS	D1037.1	D1037.1
WBGene00017026	35.1529	-0.276076	0.172424	0.607377	NS	D1037.5	D1037.5
WBGene00003418	243.135	-0.464758	0.00755399	0.105474	NS	H26D21.2	msh-2
WBGene00002042	75.0418	-0.214938	0.251758	0.685061	NS	H26D21.1	hus-1
WBGene00017651	282.421	-0.03985	0.808768	0.962008	NS	F21A9.2	F21A9.2
WBGene00017650	59.6228	0.214794	0.274775	0.70299	NS	F21A9.1	F21A9.1
WBGene00003040	11175.1	0.132979	0.0443463	0.313164	NS	T12F5.4	lin-59
WBGene00001601	315.26	-0.101166	0.494506	0.853524	NS	T12F5.3	glh-4
WBGene00020467	30.4858	0.0294126	0.884547	0.976226	NS	T12F5.2	T12F5.2
WBGene00004147	4411.89	0.0395065	0.616724	0.902993	NS	T12F5.5	larp-5
WBGene00020466	54.025	-0.0564889	0.776183	0.95386	NS	T12F5.1	sld-2
WBGene00021175	21.4144	0.224561	0.256181	NA	NS	Y8G1A.1	math-46
WBGene00002135	9269.8	0.084999	0.313348	0.737279	NS	Y8G1A.2	inx-13
WBGene00002134	6654.18	0.0414001	0.613973	0.902567	NS	ZK770.3	inx-12
WBGene00022815	200.724	0.228847	0.120458	0.519314	NS	ZK770.1	asic-1
WBGene00194702	27.2809	0.103654	0.607687	0.900614	NS	C32E8.12	C32E8.12
WBGene00016324	246.71	0.100028	0.497062	0.855039	NS	C32E8.6	C32E8.6
WBGene00004368	344.585	0.103098	0.45064	0.832559	NS	C32E8.7	ric-19
WBGene00016323	190.431	0.0538636	0.719371	0.938461	NS	C32E8.5	C32E8.5
WBGene00016322	3.76826	-0.00263444	0.982853	NA	NS	C32E8.4	C32E8.4
WBGene00016321	633.76	0.0593481	0.575634	0.88967	NS	C32E8.3	C32E8.3
WBGene00004425	44704.8	-0.218887	0.00831678	0.112654	NS	C32E8.2	rpl-13
WBGene00004217	163.029	-0.0412785	0.810463	0.962008	NS	C32E8.8	ptr-2
WBGene00016325	564.031	-0.67051	0.000126531	0.00490419	down0.5	C32E8.9	C32E8.9
WBGene00016320	23.3959	0.0657573	0.729391	NA	NS	C32E8.1	C32E8.1
WBGene00006751	5135.26	0.14693	0.143325	0.560662	NS	C32E8.10	unc-11
WBGene00016326	7399.09	0.0437125	0.581033	0.891476	NS	C32E8.11	ubr-1
WBGene00003797	907.114	-0.0623301	0.569499	0.887203	NS	F53F10.5	npp-11
WBGene00006833	11513.6	-0.000819916	0.992898	0.998992	NS	F53F10.4	unc-108
WBGene00018765	1833.34	-0.96967	2.9931e-12	8.07418e-10	down0.5	F53F10.3	F53F10.3
WBGene00044423	125.081	-0.188085	0.274197	0.702365	NS	F53F10.8	F53F10.8
WBGene00018764	16779.2	-0.196363	0.0138422	0.158617	NS	F53F10.2	F53F10.2
WBGene00018763	209.898	0.0154391	0.917044	0.983703	NS	F53F10.1	F53F10.1
WBGene00020187	83.7639	0.193885	0.309419	0.734744	NS	T03F1.5	gsp-4
WBGene00020188	1046.07	0.164894	0.189139	0.624249	NS	T03F1.6	T03F1.6
WBGene00020192	3128.22	0.0435263	0.65207	0.913506	NS	T03F1.11	T03F1.11
WBGene00020189	1525.86	-0.0135444	0.886127	0.976226	NS	T03F1.7	tfbm-1
WBGene00020190	1316.33	-0.114258	0.251117	0.685061	NS	T03F1.8	guk-1
WBGene00001832	388.934	-0.358364	0.00569778	0.0873314	NS	T03F1.9	hcp-4
WBGene00020185	7959.76	-0.348808	0.0116398	0.14195	NS	T03F1.3	pgk-1
WBGene00000764	261.857	-0.0845903	0.634309	0.908401	NS	T03F1.2	coq-4
WBGene00020191	157.164	-0.593661	0.000522076	0.014856	down0.5	T03F1.10	clec-53
WBGene00020184	631.074	-0.0657213	0.557196	0.882393	NS	T03F1.1	uba-5
WBGene00020193	55.6103	0.0499373	0.803907	0.960772	NS	T03F1.12	T03F1.12
WBGene00016837	870.206	-0.0414802	0.70414	0.935218	NS	C50F2.3	C50F2.3
WBGene00016836	791.826	-0.0186008	0.851024	0.971852	NS	C50F2.2	C50F2.2
WBGene00000013	23.0495	0.241826	0.22063	NA	NS	C50F2.10	abf-2
WBGene00000012	20.7571	0.0189742	0.922914	NA	NS	C50F2.9	abf-1
WBGene00016838	1543.52	-0.0974479	0.322779	0.745689	NS	C50F2.4	C50F2.4
WBGene00016835	45.5979	0.0678136	0.733339	0.943055	NS	C50F2.1	C50F2.1
WBGene00016839	13.2562	-0.0801164	0.655877	NA	NS	C50F2.5	C50F2.5
WBGene00001430	69.6233	0.025893	0.896688	0.978205	NS	C50F2.6	fkb-5
WBGene00016840	285.785	0.16359	0.248032	0.682411	NS	C50F2.7	C50F2.7
WBGene00016841	841.749	0.0233645	0.834816	0.967426	NS	C50F2.8	magu-3
WBGene00003950	622.939	-0.0562782	0.58836	0.89347	NS	T20F5.2	pbs-4
WBGene00020625	279.939	-0.1443	0.299405	0.725805	NS	T20F5.3	mrrf-1
WBGene00077599	11.9154	0.386819	0.0317771	NA	NS	T20F5.8	T20F5.8
WBGene00020626	73.1049	0.239954	0.217939	0.652801	NS	T20F5.4	T20F5.4
WBGene00020627	16.6411	-0.345062	0.0722208	NA	NS	T20F5.5	T20F5.5
WBGene00020628	1119.9	-0.0560017	0.534455	0.870936	NS	T20F5.6	T20F5.6
WBGene00020629	315.802	-0.139363	0.284828	0.713153	NS	T20F5.7	T20F5.7
WBGene00020653	3.77255	-0.00619691	0.953897	NA	NS	T21E3.2	T21E3.2
WBGene00020652	107.981	0.0613587	0.73043	0.942681	NS	T21E3.1	egg-4
WBGene00003072	14612.7	-0.0195227	0.782152	0.95568	NS	T21E3.3	lrp-2
WBGene00018528	0.122968	0	1	NA	NS	F47B3.4	F47B3.4
WBGene00018529	0.612429	0.00773159	0.851224	NA	NS	F47B3.5	F47B3.5
WBGene00018527	180.086	-0.000945799	0.995347	0.998992	NS	F47B3.3	F47B3.3
WBGene00018530	0.700621	-0.0508044	0.291571	NA	NS	F47B3.6	F47B3.6
WBGene00018531	0.387102	0	1	NA	NS	F47B3.7	F47B3.7
WBGene00018526	0.188415	0	1	NA	NS	F47B3.2	F47B3.2
WBGene00018525	2.48453	-0.0219351	0.826484	NA	NS	F47B3.1	F47B3.1
WBGene00017909	239.319	0.0566486	0.715895	0.938247	NS	F28H1.4	F28H1.4
WBGene00017910	0.671089	0	1	NA	NS	F28H1.5	F28H1.5
WBGene00000197	2324.24	-0.0178147	0.830521	0.967268	NS	F28H1.3	aars-2
WBGene00000779	15203.8	-0.0936794	0.343494	0.763309	NS	F28H1.2	cpn-3
WBGene00017908	329.411	-0.0737985	0.589926	0.894137	NS	F28H1.1	F28H1.1
WBGene00006805	19119.8	0.0798429	0.39302	0.79775	NS	F55C7.7	unc-73
WBGene00018868	143.58	0.286121	0.100881	0.481489	NS	F55C7.2	F55C7.2
WBGene00006820	174632	-0.000940884	0.991843	0.998992	NS	C09D1.1	unc-89
WBGene00015631	233.081	-0.00369121	0.981219	0.99663	NS	C09D1.2	clec-89
WBGene00016066	177.085	0.207913	0.226867	0.661209	NS	C24G7.4	acd-2
WBGene00016064	34.2552	0.0523403	0.795356	0.959633	NS	C24G7.2	acd-1
WBGene00016063	163.141	-0.0365618	0.852075	0.971852	NS	C24G7.1	delm-2
WBGene00000867	44.9037	0.015102	0.940515	0.988982	NS	H31G24.4	cyb-2.2
WBGene00019254	23.7142	0.0891863	0.652248	NA	NS	H31G24.3	H31G24.3
WBGene00019253	58.0401	0.197319	0.326947	0.748335	NS	H31G24.1	H31G24.1
WBGene00003029	330.474	0.131138	0.4498	0.832143	NS	E01A2.3	lin-44
WBGene00002696	443.333	0.0895597	0.464398	0.839877	NS	E01A2.4	let-504
WBGene00017085	1061.33	-0.0959753	0.383186	0.790398	NS	E01A2.2	E01A2.2
WBGene00017087	111.947	0.264242	0.130934	0.537629	NS	E01A2.5	E01A2.5
WBGene00017088	1775.72	0.0767742	0.350667	0.767326	NS	E01A2.6	akir-1
WBGene00017084	593.695	-0.127452	0.305187	0.731018	NS	E01A2.1	E01A2.1
WBGene00017089	163.095	-0.0258567	0.88095	0.976014	NS	E01A2.7	poml-2
WBGene00077701	352.599	0.00338303	0.983378	0.997353	NS	E01A2.10	poml-3
WBGene00017090	0.179013	0.00516385	0.847377	NA	NS	E01A2.8	E01A2.8
WBGene00020040	1.99361	0.124875	0.149448	NA	NS	R12E2.15	R12E2.15
WBGene00020039	7.02917	0.371126	0.0122928	NA	NS	R12E2.14	R12E2.14
WBGene00020032	0.173689	0.0114877	0.668528	NA	NS	R12E2.6	R12E2.6
WBGene00020033	14.762	0.395885	0.0294869	NA	NS	R12E2.7	R12E2.7
WBGene00020034	36.9062	-0.538083	0.00737494	0.10351	NS	R12E2.8	R12E2.8
WBGene00002137	2381.45	-0.285505	0.0107215	0.132915	NS	R12E2.9	inx-15
WBGene00002138	2307.52	-0.272267	0.0138405	0.158617	NS	R12E2.5	inx-16
WBGene00002139	858.849	-0.349548	0.00437339	0.0723782	NS	R12E2.4	inx-17
WBGene00020035	109.791	0.0170935	0.925433	0.986071	NS	R12E2.10	egg-5
WBGene00020036	1467.27	-0.0555964	0.652683	0.913638	NS	R12E2.11	R12E2.11
WBGene00020037	554.801	-0.113869	0.318156	0.741284	NS	R12E2.12	mrps-6
WBGene00004464	737.99	-0.141266	0.189175	0.624249	NS	R12E2.3	rpn-8
WBGene00020038	1251.73	0.00879089	0.942229	0.989015	NS	R12E2.13	R12E2.13
WBGene00020031	5010.79	-0.110994	0.24972	0.684043	NS	R12E2.2	R12E2.2
WBGene00020030	734.582	0.0980782	0.358883	0.773364	NS	R12E2.1	R12E2.1
WBGene00004093	689.754	-0.238579	0.100867	0.481489	NS	C18E3.7	ppw-1
WBGene00015975	107.497	-0.067829	0.709003	0.936326	NS	C18E3.6	cas-2
WBGene00015974	209.828	0.159593	0.315302	0.738336	NS	C18E3.5	C18E3.5
WBGene00015973	45.2529	0.0331659	0.870248	0.974432	NS	C18E3.4	C18E3.4
WBGene00015972	1191.64	-0.143202	0.119353	0.518583	NS	C18E3.3	C18E3.3
WBGene00001985	32.5347	0.0113773	0.955273	0.991285	NS	C18E3.8	hop-1
WBGene00015971	474.998	-0.0693993	0.569409	0.887203	NS	C18E3.2	swsn-2.2
WBGene00015970	12.323	-0.0861906	0.627514	NA	NS	C18E3.1	C18E3.1
WBGene00015976	197.978	-0.0386815	0.796326	0.959775	NS	C18E3.9	C18E3.9
WBGene00003516	1529.82	0.0760529	0.41401	0.808361	NS	C43E11.6	nab-1
WBGene00016605	24.9301	-0.261271	0.187755	NA	NS	C43E11.5	C43E11.5
WBGene00003584	476.681	-0.45447	8.70637e-05	0.00367288	down	C43E11.7	ndx-7
WBGene00016606	877.178	-0.119796	0.304859	0.730881	NS	C43E11.8	exoc-7
WBGene00007001	1389.42	-0.337212	0.0473158	0.325793	NS	C43E11.4	tufm-2
WBGene00016608	881.624	-0.0877064	0.555021	0.881449	NS	C43E11.11	cogc-5
WBGene00016609	239.437	0.0383425	0.821619	0.963871	NS	C43E11.12	C43E11.12
WBGene00016603	4954.59	0.129615	0.169172	0.601141	NS	C43E11.3	met-1
WBGene00016602	548.693	-0.09056	0.426689	0.817432	NS	C43E11.2	mus-81
WBGene00016607	662.169	0.121782	0.310662	0.734744	NS	C43E11.9	C43E11.9
WBGene00000382	403.641	-0.108874	0.462634	0.83862	NS	C43E11.10	cdc-6
WBGene00016601	623.39	-0.168219	0.152103	0.576335	NS	C43E11.1	acin-1
WBGene00021631	0.429726	-0.0212828	0.522368	NA	NS	Y47D9A.4	Y47D9A.4
WBGene00021630	0.458136	-0.0406355	0.285323	NA	NS	Y47D9A.3	Y47D9A.3
WBGene00021632	0	NA	NA	NA	NS	Y47D9A.5	Y47D9A.5
WBGene00021629	2154.86	0.190332	0.0439509	0.311849	NS	Y47D9A.2	scpl-3
WBGene00021628	1179.82	-0.0365124	0.776126	0.95386	NS	Y47D9A.1	Y47D9A.1
WBGene00000140	413691	0.0369061	0.572552	0.88794	NS	ZK973.6	anc-1
WBGene00000045	40.6199	0.0331064	0.870286	0.974432	NS	ZK973.5	acr-6
WBGene00022833	0.112011	0	1	NA	NS	ZK973.4	ZK973.4
WBGene00022834	33.0977	-0.231387	0.254364	0.686036	NS	ZK973.8	ZK973.8
WBGene00022832	752.805	-0.147777	0.157955	0.584659	NS	ZK973.3	pdp-1
WBGene00022835	246.982	-0.020017	0.887595	0.976226	NS	ZK973.9	ZK973.9
WBGene00003061	1706.97	-0.425596	1.47778e-05	0.000848185	down	ZK973.10	lpd-5
WBGene00022831	1158.19	0.028123	0.764238	0.951493	NS	ZK973.2	cec-10
WBGene00022836	869.214	-0.0806694	0.392281	0.796924	NS	ZK973.11	ZK973.11
WBGene00022830	343.622	-0.205257	0.102354	0.484633	NS	ZK973.1	ZK973.1
WBGene00000962	15119.2	-0.303171	0.00199353	0.0409558	down	T21E12.4	dhc-1
WBGene00020655	2.52424	-0.178219	0.0808188	NA	NS	T21E12.3	T21E12.3
WBGene00015704	1462.17	0.0743398	0.390854	0.796495	NS	C11D9.1	tiam-1
WBGene00020656	19.4681	0.117871	0.534829	NA	NS	T21E12.5	T21E12.5
WBGene00195180	1.21039	0.0512475	0.480896	NA	NS	C41D11.10	C41D11.10
WBGene00016562	3744.03	-0.0526805	0.50914	0.860346	NS	C41D11.3	C41D11.3
WBGene00001231	1826.61	0.0320831	0.747784	0.947475	NS	C41D11.2	eif-3.H
WBGene00000787	1000.69	-0.194291	0.122261	0.520188	NS	C41D11.8	cps-6
WBGene00016567	56.4974	-0.0345174	0.861983	0.973185	NS	C41D11.9	C41D11.9
WBGene00016564	121.343	-0.0199062	0.90629	0.980433	NS	C41D11.5	C41D11.5
WBGene00016566	229.143	-0.380062	0.0126403	0.149555	NS	C41D11.7	eri-7
WBGene00016561	1265.33	-0.174863	0.0907027	0.457682	NS	C41D11.1	eri-6
WBGene00016565	500.68	-0.1229	0.330101	0.752106	NS	C41D11.6	C41D11.6
WBGene00020131	18230.8	0.126841	0.216177	0.650411	NS	T01A4.1	gcy-28
WBGene00022470	735.337	-0.20774	0.0717357	0.407914	NS	Y119C1B.4	mrpl-19
WBGene00022471	554.409	-0.379139	0.00119966	0.0278503	down	Y119C1B.5	Y119C1B.5
WBGene00022472	258.082	-0.00728183	0.960325	0.99309	NS	Y119C1B.6	Y119C1B.6
WBGene00044754	22.8839	0.0148787	0.938585	NA	NS	Y119C1B.12	Y119C1B.12
WBGene00022473	4318.97	0.0925646	0.235979	0.672063	NS	Y119C1B.8	bet-1
WBGene00022474	927.34	-0.525421	0.000141849	0.00540469	down0.5	Y119C1B.9	zig-9
WBGene00022469	282.475	0.192535	0.164864	0.595277	NS	Y119C1B.3	Y119C1B.3
WBGene00044441	0.989091	0.059996	0.327761	NA	NS	Y119C1B.11	Y119C1B.11
WBGene00022467	11.402	0.128498	0.441701	NA	NS	Y119C1B.1	Y119C1B.1
WBGene00022475	694.397	-0.0713664	0.54842	0.878869	NS	Y119C1B.10	Y119C1B.10
WBGene00017010	1152.41	-0.0879451	0.341641	0.761573	NS	D1007.15	D1007.15
WBGene00004113	514.487	-0.0975275	0.48228	0.848164	NS	D1007.14	pqn-24
WBGene00017009	40.857	-0.120973	0.551304	0.880004	NS	D1007.13	D1007.13
WBGene00000440	66.218	0.0284997	0.885468	0.976226	NS	D1007.1	ceh-17
WBGene00000629	44.8348	0.0679833	0.735398	0.943648	NS	D1007.2	col-52
WBGene00017001	141.236	0.134158	0.456516	0.835711	NS	D1007.3	D1007.3
WBGene00044421	72.0537	-0.163431	0.409234	0.805685	NS	D1007.18	D1007.18
WBGene00017002	31.693	0.274698	0.175125	0.610594	NS	D1007.4	D1007.4
WBGene00017003	362.13	0.099195	0.460207	0.837929	NS	D1007.5	D1007.5
WBGene00004479	13301.9	-0.0501556	0.585884	0.892792	NS	D1007.6	rps-10
WBGene00004436	16837.9	-0.203328	0.0357626	0.278898	NS	D1007.12	rpl-24.1
WBGene00017007	215.821	-0.125865	0.377609	0.78708	NS	D1007.10	D1007.10
WBGene00045048	35.6048	0.232377	0.252217	0.685326	NS	D1007.19	D1007.19
WBGene00017006	11.9972	-0.00594345	0.973626	NA	NS	D1007.9	D1007.9
WBGene00017004	2042.6	-0.0685381	0.511561	0.8612	NS	D1007.7	nrd-1
WBGene00017011	159.924	-0.0284973	0.855466	0.972074	NS	D1007.16	eaf-1
WBGene00017005	64.7599	-0.122584	0.532537	0.870438	NS	D1007.8	D1007.8
WBGene00016654	277.196	-0.0235828	0.863947	0.973185	NS	C44E4.5	C44E4.5
WBGene00016650	14186.4	-0.0471669	0.493424	0.853135	NS	C44E4.1	C44E4.1
WBGene00016653	1810.1	0.316833	0.0113565	0.139505	NS	C44E4.4	C44E4.4
WBGene00016655	1695.13	-0.114432	0.27825	0.705988	NS	C44E4.6	acbp-1
WBGene00016652	176.414	-0.113184	0.456222	0.835711	NS	C44E4.3	got-2.1
WBGene00022466	690.044	0.159815	0.129883	0.535638	NS	Y119C1A.1	Y119C1A.1
WBGene00015008	174.422	0.0235612	0.883825	0.976174	NS	B0041.3	lmd-2
WBGene00004415	88167.2	-0.186115	0.0193209	0.194477	NS	B0041.4	rpl-4
WBGene00015011	202.251	0.0228533	0.880109	0.975857	NS	B0041.8	B0041.8
WBGene00015009	668.56	0.0607959	0.603051	0.898581	NS	B0041.5	B0041.5
WBGene00015010	22.627	-0.055721	0.779356	NA	NS	B0041.6	ptps-1
WBGene00015007	5032.16	-0.129226	0.142291	0.55865	NS	B0041.2	ain-2
WBGene00206362	49.8343	0.126277	0.531594	0.869951	NS	B0041.11	B0041.11
WBGene00015006	2.23781	0.00667493	0.944415	NA	NS	B0041.1	B0041.1
WBGene00006961	1627.66	-0.165802	0.0601916	0.374464	NS	B0041.7	xnp-1
WBGene00006791	3530.85	0.0983977	0.273147	0.702039	NS	T04D1.3	unc-57
WBGene00020212	133.194	0.30474	0.111834	0.503626	NS	T04D1.2	T04D1.2
WBGene00007053	19227.9	0.0365576	0.540191	0.873963	NS	T04D1.4	chd-7
WBGene00021112	219.866	0.0400143	0.785038	0.956317	NS	W09C3.4	W09C3.4
WBGene00021111	27.0264	0.0136271	0.945064	0.989181	NS	W09C3.3	W09C3.3
WBGene00021113	0.34904	0.00873557	0.802036	NA	NS	W09C3.6	gsp-3
WBGene00021110	0	NA	NA	NA	NS	W09C3.2	W09C3.2
WBGene00021114	1.20263	0.0285125	0.672538	NA	NS	W09C3.7	W09C3.7
WBGene00021115	4.62314	0.0213785	0.863615	NA	NS	W09C3.8	W09C3.8
WBGene00021109	28.9508	-0.282005	0.155684	0.580877	NS	W09C3.1	W09C3.1
WBGene00015696	2.57221	0.0619124	0.570512	NA	NS	C10H11.7	C10H11.7
WBGene00015695	477.087	-0.385246	0.0125308	0.14865	NS	C10H11.6	ugt-26
WBGene00015694	13.9572	-0.135483	0.460546	NA	NS	C10H11.5	ugt-27
WBGene00015693	140.565	0.567155	0.00181634	0.0382196	up0.5	C10H11.4	ugt-28
WBGene00015692	284.31	0.444419	0.00954119	0.123032	NS	C10H11.3	ugt-25
WBGene00015697	320.662	0.0174213	0.900378	0.979069	NS	C10H11.8	C10H11.8
WBGene00002694	1640.36	-0.0280916	0.770624	0.952532	NS	C10H11.9	let-502
WBGene00015691	741.86	-0.0867782	0.407944	0.805489	NS	C10H11.1	viln-1
WBGene00015698	39.7758	0.0299192	0.882818	0.976014	NS	C10H11.10	kca-1
WBGene00019769	50.5041	-0.361427	0.0729373	0.411584	NS	M04F3.3	M04F3.3
WBGene00019768	96.5017	-0.153658	0.402785	0.804634	NS	M04F3.2	M04F3.2
WBGene00019767	762.12	-0.313588	0.00599398	0.0905339	NS	M04F3.1	rpa-2
WBGene00019770	690.517	-0.102248	0.292724	0.722068	NS	M04F3.4	M04F3.4
WBGene00019771	877.35	0.028112	0.803874	0.960772	NS	M04F3.5	M04F3.5
WBGene00006984	482.373	-0.00465218	0.976014	0.995198	NS	F54D7.4	zig-7
WBGene00018798	180.19	0.273541	0.1001	0.479767	NS	F54D7.3	gnrr-1
WBGene00018797	2821.37	-0.0082623	0.924872	0.986071	NS	F54D7.2	F54D7.2
WBGene00019012	158.397	0.10133	0.532719	0.870539	NS	F57C9.6	F57C9.6
WBGene00019013	36.9772	-0.0817769	0.687133	0.927176	NS	F57C9.7	tofu-4
WBGene00002034	97.8453	-0.0389016	0.836791	0.96743	NS	F57C9.5	htp-3
WBGene00019011	612.59	0.082001	0.487337	0.849853	NS	F57C9.4	F57C9.4
WBGene00019010	651.946	0.0421334	0.724682	0.940885	NS	F57C9.3	glo-2
WBGene00019009	499.98	-0.0311421	0.811738	0.962778	NS	F57C9.2	clec-90
WBGene00019008	435.655	-0.170626	0.184827	0.620572	NS	F57C9.1	F57C9.1
WBGene00015303	2266.63	0.250436	0.00852437	0.114747	NS	C01F4.2	rga-6
WBGene00017795	1935.95	0.171714	0.128053	0.532096	NS	F25F8.1	F25F8.1
WBGene00001592	1257.39	0.151767	0.153373	0.578298	NS	F25F8.2	glc-2
WBGene00017674	44.2556	-0.0909602	0.653104	0.913638	NS	F21F3.4	F21F3.4
WBGene00006774	624.454	0.0276091	0.796878	0.959823	NS	F21F3.5	unc-38
WBGene00017673	12.2632	0.0302073	0.857268	NA	NS	F21F3.3	F21F3.3
WBGene00017672	14.828	0.152339	0.403549	NA	NS	F21F3.2	F21F3.2
WBGene00017671	4905.72	0.129738	0.179935	0.613023	NS	F21F3.1	pgal-1
WBGene00017675	6489.13	0.0163206	0.875586	0.97512	NS	F21F3.6	F21F3.6
WBGene00017676	880.188	0.0355699	0.737559	0.94412	NS	F21F3.7	F21F3.7
WBGene00002075	2176.81	-0.0891332	0.251474	0.685061	NS	F28B3.8	imb-1
WBGene00017886	371.296	0.162111	0.191027	0.626238	NS	F28B3.5	F28B3.5
WBGene00017888	416.466	-0.0202098	0.862646	0.973185	NS	F28B3.9	acl-11
WBGene00017885	6776.41	0.0983237	0.191325	0.626814	NS	F28B3.4	dip-2
WBGene00017889	1210.19	-0.338234	0.000395081	0.0121389	down	F28B3.10	F28B3.10
WBGene00017887	516.231	-0.0795937	0.478827	0.847113	NS	F28B3.6	F28B3.6
WBGene00001860	2054.41	-0.11082	0.170712	0.603958	NS	F28B3.7	him-1
WBGene00044431	101.416	0.119232	0.501493	0.856979	NS	W03G9.8	W03G9.8
WBGene00021015	112.286	-0.031339	0.859115	0.973185	NS	W03G9.3	enu-3.3
WBGene00021014	62.7695	-0.339863	0.0888195	0.453059	NS	W03G9.2	W03G9.2
WBGene00000155	1893.86	-0.220367	0.0629048	0.383258	NS	W03G9.4	app-1
WBGene00021016	2.73778	0.123613	0.255544	NA	NS	W03G9.5	W03G9.5
WBGene00044432	5.36875	0.128346	0.360554	NA	NS	W03G9.9	W03G9.9
WBGene00004900	2412.4	0.0789387	0.310614	0.734744	NS	W03G9.1	snf-1
WBGene00195069	15.0306	0.168823	0.354952	NA	NS	W03G9.10	W03G9.10
WBGene00003906	22.117	-0.0999013	0.606995	NA	NS	W03G9.6	paf-1
WBGene00021017	38.6887	0.0184842	0.925923	0.986071	NS	W03G9.7	W03G9.7
WBGene00001117	322.547	0.185813	0.196022	0.634399	NS	F54C1.5	dyf-1
WBGene00003221	1697.56	-0.0660047	0.426776	0.817432	NS	F54C1.3	mes-3
WBGene00001050	214.684	-0.110937	0.472331	0.844606	NS	F54C1.2	dom-3
WBGene00018792	7.96149	0.0957535	0.550061	NA	NS	F54C1.8	F54C1.8
WBGene00006058	19.3981	0.139229	0.466584	NA	NS	F54C1.9	sst-20
WBGene00018789	631.021	-0.0529794	0.721972	0.939409	NS	F54C1.1	F54C1.1
WBGene00018791	79.2174	0.147921	0.450573	0.832559	NS	F54C1.6	F54C1.6
WBGene00003934	25610.3	-0.15527	0.108324	0.496678	NS	F54C1.7	pat-10
WBGene00016730	18.272	0.169438	0.346815	NA	NS	C46H11.6	C46H11.6
WBGene00002979	4476.67	-0.0680047	0.4804	0.847414	NS	C46H11.4	lfe-2
WBGene00016729	22.4411	0.0922146	0.639345	NA	NS	C46H11.3	C46H11.3
WBGene00016731	2.36729	0.0579228	0.510885	NA	NS	C46H11.7	C46H11.7
WBGene00016732	1.80292	-0.0131291	0.878211	NA	NS	C46H11.8	phat-1
WBGene00016733	9.16605	0.247084	0.141964	NA	NS	C46H11.9	phat-2
WBGene00016728	864.647	0.344135	0.00496377	0.0795146	NS	C46H11.2	C46H11.2
WBGene00016734	902.993	0.118562	0.267454	0.696952	NS	C46H11.10	C46H11.10
WBGene00016727	14.5894	0.0396784	0.83227	NA	NS	C46H11.1	C46H11.1
WBGene00016735	2048.76	0.097448	0.201527	0.639276	NS	C46H11.11	fhod-1
WBGene00016258	19696.1	-0.0515369	0.534874	0.87111	NS	C30F8.2	vha-16
WBGene00002213	881.859	0.114287	0.311073	0.735177	NS	C30F8.4	kin-32
WBGene00016259	7.8332	0.191301	0.182737	NA	NS	C30F8.3	C30F8.3
WBGene00022465	20.672	0.0425005	0.8249	NA	NS	Y110A7A.20	ift-20
WBGene00004959	55.3007	-0.164749	0.405273	0.805489	NS	Y110A7A.12	spe-5
WBGene00000502	784.053	-0.170895	0.117725	0.514707	NS	Y110A7A.13	chp-1
WBGene00003924	1178.11	-0.305396	0.000602664	0.0164549	down	Y110A7A.14	pas-3
WBGene00022460	154.525	0.0178271	0.912644	0.982108	NS	Y110A7A.11	use-1
WBGene00000001	553.676	0.00786229	0.949789	0.990471	NS	Y110A7A.10	aap-1
WBGene00045212	140.253	-0.22985	0.205424	0.643515	NS	Y110A7A.21	Y110A7A.21
WBGene00022462	90.6471	-0.0625056	0.74485	0.946015	NS	Y110A7A.15	Y110A7A.15
WBGene00022463	1514.26	0.0669469	0.476908	0.846053	NS	Y110A7A.16	elpc-1
WBGene00022459	1153.64	-0.0409847	0.655813	0.914773	NS	Y110A7A.9	Y110A7A.9
WBGene00003132	1599.88	0.0482813	0.593891	0.895118	NS	Y110A7A.17	mat-1
WBGene00022458	571.965	-0.088368	0.457287	0.835864	NS	Y110A7A.8	prp-31
WBGene00022457	184.452	-0.0144135	0.930241	0.987145	NS	Y110A7A.7	Y110A7A.7
WBGene00022456	1462.31	-0.436885	5.0334e-05	0.00239099	down	Y110A7A.6	pfkb-1.1
WBGene00003475	654.438	-0.0382227	0.74615	0.946494	NS	Y110A7A.5	mtm-1
WBGene00022455	104.954	-0.313946	0.0848403	0.44222	NS	Y110A7A.4	tyms-1
WBGene00006797	789.661	0.0638698	0.554995	0.881449	NS	Y110A7A.3	unc-63
WBGene00022454	37.8033	-0.227283	0.262648	0.69221	NS	Y110A7A.2	Y110A7A.2
WBGene00004094	564.825	-0.111355	0.480278	0.847414	NS	Y110A7A.18	ppw-2
WBGene00022464	1248.8	-0.366992	0.000455564	0.0135944	down	WBGene00022464	Y110A7A.19
WBGene00001833	404.647	-0.190792	0.347445	0.765456	NS	Y110A7A.1	hcp-6
WBGene00004955	1114.97	-0.482934	1.98439e-06	0.000152076	down	F56A3.4	spd-5
WBGene00003792	2707.49	-0.165373	0.032335	0.264645	NS	F56A3.3	npp-6
WBGene00018909	215.407	-0.158813	0.296518	0.724596	NS	F56A3.2	slx-1
WBGene00000272	7.28425	0.290547	0.0550627	NA	NS	F56A3.5	bro-1
WBGene00018908	102.795	-0.304867	0.113218	0.505321	NS	F56A3.1	fncm-1
WBGene00016328	216.842	-0.00841343	0.961214	0.993315	NS	C32E12.2	pde-5
WBGene00016329	8.02492	0.0605039	0.696918	NA	NS	C32E12.3	osr-1
WBGene00004771	395.014	0.163888	0.198361	0.634906	NS	C32E12.5	sem-2
WBGene00016330	781.551	0.0180976	0.885192	0.976226	NS	C32E12.4	C32E12.4
WBGene00016327	80.495	-0.0572129	0.769504	0.952532	NS	C32E12.1	C32E12.1
WBGene00015092	933.822	-0.252888	0.0264454	0.236379	NS	B0261.4	mrpl-47
WBGene00002583	11963.1	-0.131437	0.0553255	0.356026	NS	B0261.2	let-363
WBGene00015093	27.0611	-0.00208619	0.991761	0.998992	NS	B0261.5	B0261.5
WBGene00015094	42.7478	0.120375	0.552061	0.880177	NS	B0261.6	B0261.6
WBGene00015091	1739.45	-0.0712976	0.403008	0.804634	NS	B0261.1	B0261.1
WBGene00195057	2.55453	0.0928425	0.356907	NA	NS	B0261.9	B0261.9
WBGene00015095	70.0905	-0.11921	0.542286	0.875087	NS	B0261.7	B0261.7
WBGene00015096	36.6071	-0.0909605	0.650388	0.913239	NS	B0261.8	B0261.8
WBGene00015312	33.5348	0.00759999	0.970108	0.994813	NS	C01G8.1	C01G8.1
WBGene00000540	352.74	0.0252505	0.856945	0.972566	NS	C01G8.2	cln-3.2
WBGene00000965	452.658	-0.130602	0.276227	0.704433	NS	C01G8.3	dhs-1
WBGene00001022	184.319	0.0220961	0.88665	0.976226	NS	C01G8.4	dnj-4
WBGene00001333	9608	-0.0605423	0.521836	0.865753	NS	C01G8.5	erm-1
WBGene00015313	65.9769	0.00405816	0.983157	0.997272	NS	C01G8.6	hpo-32
WBGene00002717	24643.6	0.0138737	0.827852	0.966257	NS	C01G8.9	let-526
WBGene00018596	54.5634	0.0551474	0.784571	0.956283	NS	F48C1.3	F48C1.3
WBGene00018598	62.7025	-0.0882289	0.651347	0.913239	NS	F48C1.5	F48C1.5
WBGene00018599	328.275	-0.268097	0.0611308	0.376843	NS	F48C1.6	F48C1.6
WBGene00018595	21.6735	-0.250341	0.202598	NA	NS	F48C1.2	fbxa-145
WBGene00018594	899.019	0.337582	0.00935944	0.121877	NS	F48C1.1	aman-3
WBGene00004965	1.03185	-0.043925	0.490853	NA	NS	F48C1.7	spe-11
WBGene00018601	0.612923	-0.0031822	0.947376	NA	NS	F48C1.9	F48C1.9
WBGene00195179	3.70825	0.0231696	0.806374	NA	NS	F48C1.11	F48C1.11
WBGene00018600	33.6958	0.419889	0.0380524	0.288986	NS	F48C1.8	F48C1.8
WBGene00018865	30.7229	0.453419	0.0240013	0.22157	NS	F55A12.6	F55A12.6
WBGene00000150	1359.96	-0.267382	0.0113975	0.139754	NS	F55A12.7	apm-1
WBGene00018864	895.87	0.0234236	0.828759	0.966537	NS	F55A12.5	F55A12.5
WBGene00018866	2906.21	0.0401634	0.614024	0.902567	NS	F55A12.8	nath-10
WBGene00000966	190.155	-0.668366	9.53964e-05	0.00393488	down0.5	F55A12.4	dhs-2
WBGene00004087	3191.83	0.179515	0.0303157	0.255019	NS	F55A12.3	ppk-1
WBGene00018863	270.02	-0.17761	0.210632	0.648764	NS	F55A12.2	F55A12.2
WBGene00018867	15.235	0.135689	0.420873	NA	NS	F55A12.10	F55A12.10
WBGene00018862	175.439	-0.127207	0.421429	0.813129	NS	F55A12.1	wago-2
WBGene00004131	9584.9	0.112875	0.189168	0.624249	NS	F55A12.9	pqn-44
WBGene00016041	673.74	0.188642	0.176118	0.611338	NS	C24A11.2	C24A11.2
WBGene00016042	137	0.186305	0.322057	0.745343	NS	C24A11.5	C24A11.5
WBGene00016043	6.34724	0.00710496	0.956737	NA	NS	C24A11.6	C24A11.6
WBGene00016040	174.637	-0.101313	0.547261	0.877908	NS	C24A11.1	C24A11.1
WBGene00001491	4861.93	-0.32266	0.0171625	0.179032	NS	C24A11.8	frm-4
WBGene00000761	2394.85	-0.207353	0.0688755	0.400096	NS	C24A11.9	coq-1
WBGene00016278	2762.07	-0.0405282	0.642006	0.911186	NS	C30H7.2	C30H7.2
WBGene00017855	1237.13	0.0614385	0.557438	0.882393	NS	F27C1.6	F27C1.6
WBGene00017854	64.5948	-0.162906	0.407183	0.805489	NS	F27C1.4	F27C1.4
WBGene00017853	181.524	0.0552447	0.732326	0.942814	NS	F27C1.3	F27C1.3
WBGene00000230	16174.9	-0.276369	7.32383e-05	0.00321772	down	F27C1.7	atp-3
WBGene00017852	1684.99	-0.247152	0.0320762	0.263486	NS	F27C1.2	F27C1.2
WBGene00001067	6.66232	-0.0436397	0.713804	NA	NS	F27C1.8	dpy-5
WBGene00017858	841.559	0.191787	0.134597	0.543205	NS	F27C1.11	F27C1.11
WBGene00017851	32.3999	0.181646	0.367282	0.779047	NS	F27C1.1	F27C1.1
WBGene00017860	110.055	-0.127992	0.473225	0.844857	NS	F27C1.13	F27C1.13
WBGene00020262	1.67768	0.0262363	0.748276	NA	NS	T05E8.1	ferl-1
WBGene00001859	14.3347	-0.121862	0.509513	NA	NS	T05E8.2	hil-8
WBGene00020263	1136.68	0.132927	0.213395	0.649775	NS	T05E8.3	T05E8.3
WBGene00015635	800.842	-0.0274931	0.828543	0.966537	NS	C09D4.4	C09D4.4
WBGene00004431	39489.7	-0.231837	0.00788042	0.108777	NS	C09D4.5	rpl-19
WBGene00015636	20.9415	-0.115205	0.55101	NA	NS	C09D4.6	C09D4.6
WBGene00206357	2.24919	0.0671814	0.481619	NA	NS	C09D4.9	C09D4.9
WBGene00015634	9.3815	-0.0349527	0.833851	NA	NS	C09D4.3	C09D4.3
WBGene00015633	134.952	-0.135234	0.436196	0.82398	NS	C09D4.2	C09D4.2
WBGene00015632	2022.39	-0.0667379	0.461206	0.837929	NS	C09D4.1	C09D4.1
WBGene00019076	811.853	-0.248005	0.0240329	0.22157	NS	F59A3.3	mrpl-24
WBGene00019077	448.091	-0.0970514	0.395525	0.798868	NS	F59A3.4	F59A3.4
WBGene00019078	317.231	-0.0465896	0.735705	0.943648	NS	WBGene00019078	rpa-3
WBGene00019079	364.846	-0.197216	0.129113	0.53416	NS	F59A3.6	rpa-4
WBGene00019075	308.858	-0.097412	0.459736	0.837929	NS	F59A3.2	F59A3.2
WBGene00185086	74.2841	0.213179	0.274427	0.702365	NS	F59A3.12	F59A3.12
WBGene00194697	4.6119	0.124108	0.347629	NA	NS	F59A3.13	F59A3.13
WBGene00019080	6.17515	-0.165416	0.233528	NA	NS	F59A3.7	F59A3.7
WBGene00019074	1285.99	-0.0651721	0.477129	0.846333	NS	F59A3.1	cpd-1
WBGene00019081	236.757	0.0897784	0.528989	0.868217	NS	F59A3.8	F59A3.8
WBGene00019082	109.133	0.0371237	0.842217	0.968915	NS	F59A3.9	pup-3
WBGene00019083	101.602	0.171847	0.332626	0.753746	NS	F59A3.10	F59A3.10
WBGene00006594	9492.34	0.148812	0.0726935	0.410935	NS	M01A10.2	tom-1
WBGene00019693	1690.17	-0.130687	0.138896	0.552959	NS	M01A10.3	ostd-1
WBGene00019692	86.4376	-0.016189	0.933539	0.98773	NS	M01A10.1	M01A10.1
WBGene00019713	5034.99	0.249374	0.0127647	0.150732	NS	M01E11.4	pqn-52
WBGene00000474	70.2517	-0.0847045	0.6737	0.922364	NS	M01E11.5	cey-3
WBGene00019712	86.1817	-0.00500292	0.978045	0.995914	NS	M01E11.3	M01E11.3
WBGene00002225	181.181	-0.0546931	0.752038	0.948164	NS	M01E11.6	klp-15
WBGene00019711	523.805	-0.0516519	0.660736	0.916967	NS	M01E11.2	M01E11.2
WBGene00019710	146.061	-0.34661	0.0423963	0.306419	NS	M01E11.1	M01E11.1
WBGene00006508	3849.37	0.0337591	0.711208	0.937035	NS	M01E11.7	tag-163
WBGene00006456	425.956	0.0740124	0.545324	0.876679	NS	WBGene00006456	tag-83
WBGene00044422	97.8948	0.109415	0.553494	0.880961	NS	WBGene00044422	F46F11.11
WBGene00006726	108.63	-0.0657139	0.739636	0.945164	NS	F46F11.4	ubl-5
WBGene00006919	10581.3	-0.0655678	0.480095	0.847414	NS	F46F11.5	vha-10
WBGene00018512	4701.48	0.135452	0.269359	0.699356	NS	F46F11.9	trpp-8
WBGene00018509	1489.99	0.0476517	0.575515	0.889618	NS	F46F11.6	F46F11.6
WBGene00000473	126.796	-0.358828	0.0632847	0.383436	NS	F46F11.2	cey-2
WBGene00018510	23.5062	0.114182	0.5681	NA	NS	F46F11.7	F46F11.7
WBGene00018513	95.1187	0.0877871	0.649064	0.913239	NS	F46F11.10	F46F11.10
WBGene00018511	344.907	-0.249043	0.0868079	0.447236	NS	F46F11.8	F46F11.8
WBGene00018508	5091.71	0.0718669	0.374839	0.784944	NS	F46F11.1	F46F11.1
WBGene00044616	5.99625	-0.11265	0.436185	NA	NS	M01A12.4	M01A12.4
WBGene00000630	84.6841	0.281203	0.159777	0.588015	NS	M01A12.1	col-53
WBGene00018890	1168.48	0.15785	0.141515	0.557357	NS	F55F8.2	F55F8.2
WBGene00018891	1687.22	0.167899	0.075258	0.41824	NS	F55F8.3	F55F8.3
WBGene00018892	384.499	0.0480305	0.757813	0.949343	NS	F55F8.4	cir-1
WBGene00018893	799.273	0.161914	0.110121	0.500838	NS	F55F8.5	tag-345
WBGene00018894	175.085	0.136732	0.371907	0.782449	NS	F55F8.6	mff-2
WBGene00018895	0.434144	-0.00948764	0.753329	NA	NS	F55F8.7	F55F8.7
WBGene00004224	6.30598	0.0358373	0.805753	NA	NS	F55F8.1	ptr-10
WBGene00018896	13.3723	0.0473387	0.783102	NA	NS	F55F8.8	F55F8.8
WBGene00018897	369.66	-0.108731	0.414592	0.808915	NS	F55F8.9	F55F8.9
WBGene00020558	401.009	-0.172234	0.187261	0.622951	NS	T19B4.5	T19B4.5
WBGene00001039	82.0944	-0.312328	0.113449	0.505497	NS	T19B4.4	dnj-21
WBGene00020557	965.868	-0.555424	2.65408e-06	0.000191434	down0.5	T19B4.3	T19B4.3
WBGene00006776	3000.68	-0.0149826	0.843659	0.969398	NS	T19B4.7	unc-40
WBGene00003793	6335.87	0.0261631	0.717767	0.938461	NS	T19B4.2	npp-7
WBGene00020556	976.028	0.00621579	0.968187	0.994813	NS	T19B4.1	pamn-1
WBGene00002989	1129.34	0.213158	0.206633	0.645919	NS	C04F1.3	lim-7
WBGene00015442	0.257133	-0.00748388	0.780292	NA	NS	C04F1.1	C04F1.1
WBGene00018994	0.124852	0	1	NA	NS	F56H1.3	F56H1.3
WBGene00018993	1.2999	0.0210354	0.737893	NA	NS	F56H1.2	nhr-266
WBGene00206363	0.0691961	0	1	NA	NS	F56H1.10	F56H1.10
WBGene00004505	1085.29	-0.135689	0.142318	0.55865	NS	F56H1.4	rpt-5
WBGene00044305	561.003	-0.311584	0.00675439	0.0976753	NS	F56H1.6	rad-8
WBGene00000493	55.299	-0.0342983	0.862686	0.973185	NS	F56H1.1	che-14
WBGene00018995	1197.93	-0.140303	0.137286	0.54886	NS	F56H1.5	ccpp-1
WBGene00045483	1061.98	-0.341203	0.00118568	0.027813	down	F56H1.7	oxy-5
WBGene00020694	100.145	-0.0127829	0.945754	0.98922	NS	T22E7.2	dhhc-11
WBGene00020693	306.126	-0.108572	0.44234	0.827561	NS	T22E7.1	lron-8
WBGene00001856	121.361	-0.218611	0.256897	0.688355	NS	B0414.3	hil-5
WBGene00004393	689.254	-0.00247946	0.984496	0.997589	NS	B0414.2	rnt-1
WBGene00000772	88.569	-0.208967	0.274671	0.702859	NS	B0414.5	cpb-3
WBGene00001600	93.5639	-0.10211	0.584473	0.892545	NS	B0414.6	glh-3
WBGene00003472	2644.92	0.0291129	0.7193	0.938461	NS	B0414.7	mtk-1
WBGene00015175	109.827	0.032995	0.853226	0.971852	NS	B0414.1	srz-4
WBGene00015176	708.296	-0.0361388	0.721058	0.938916	NS	B0414.8	vps-51
WBGene00003020	4582.38	-0.100341	0.325361	0.747091	NS	C32F10.2	lin-35
WBGene00016332	4131.58	-0.0905169	0.409658	0.805876	NS	C32F10.4	C32F10.4
WBGene00001973	135.307	-0.372157	0.0418975	0.304685	NS	C32F10.5	hmg-3
WBGene00003601	44.5827	-0.0349645	0.811972	0.962972	NS	C32F10.6	nhr-2
WBGene00016333	4083.22	-0.303573	0.00228947	0.0456431	down	C32F10.8	C32F10.8
WBGene00016331	2250.3	-0.05579	0.568443	0.887203	NS	C32F10.1	obr-4
WBGene00018002	64.3043	-0.134458	0.489251	0.851467	NS	F33D11.5	twk-47
WBGene00000436	3.31754	-0.0650717	0.578607	NA	NS	F33D11.4	ceh-12
WBGene00000631	1.7521	0.0050344	0.955584	NA	NS	F33D11.3	col-54
WBGene00018003	0	NA	NA	NA	NS	F33D11.6	F33D11.6
WBGene00018001	0.24582	0	1	NA	NS	F33D11.2	F33D11.2
WBGene00018004	1.36539	-0.0084889	0.910878	NA	NS	F33D11.7	F33D11.7
WBGene00018000	1.14666	0.0219924	0.691764	NA	NS	F33D11.1	F33D11.1
WBGene00018005	264.982	0.155915	0.312896	0.736554	NS	F33D11.8	F33D11.8
WBGene00018006	428.726	-0.130613	0.322875	0.745689	NS	F33D11.9	hpo-3
WBGene00018009	222.245	-0.0289229	0.846352	0.970685	NS	F33D11.12	dhhc-3
WBGene00018007	1268.58	0.023846	0.791399	0.958634	NS	F33D11.10	F33D11.10
WBGene00018008	2493.5	0.0211401	0.772024	0.952772	NS	F33D11.11	vpr-1
WBGene00016421	46.3113	0.0208433	0.918053	0.98417	NS	C34G6.5	cdc-7
WBGene00016422	92.2091	0.145871	0.468888	0.842686	NS	C34G6.6	noah-1
WBGene00003996	1014.21	-0.364085	8.22284e-05	0.00352094	down	C34G6.4	pgp-2
WBGene00016420	2.58641	0.0248194	0.813467	NA	NS	C34G6.3	C34G6.3
WBGene00016419	6075.4	0.0629072	0.493874	0.853373	NS	C34G6.2	tyr-4
WBGene00004109	719.071	0.050874	0.636445	0.90918	NS	C34G6.7	stam-1
WBGene00016418	2641.32	-0.0686964	0.413702	0.807996	NS	C34G6.1	hpo-27
WBGene00015028	79.6107	0.10988	0.570209	0.887386	NS	B0207.5	B0207.5
WBGene00015029	198.503	0.0869422	0.582642	0.891777	NS	B0207.6	B0207.6
WBGene00000099	57.9288	-0.494339	0.0148365	0.164839	NS	B0207.4	air-2
WBGene00001676	366.452	0.0855177	0.573277	0.888471	NS	B0207.3	gpa-14
WBGene00015030	38.0175	0.0963244	0.629691	0.90664	NS	B0207.7	B0207.7
WBGene00015031	12.4995	0.00482101	0.978762	NA	NS	B0207.8	B0207.8
WBGene00015027	81.1323	0.218475	0.244308	0.678729	NS	B0207.2	B0207.2
WBGene00015032	2.92941	0.023873	0.825062	NA	NS	B0207.9	B0207.9
WBGene00015033	34.8127	-0.108808	0.592051	0.894624	NS	B0207.10	B0207.10
WBGene00015034	2.44085	-0.0719716	0.461691	NA	NS	B0207.11	B0207.11
WBGene00015026	13.8379	0.23295	0.20665	NA	NS	B0207.1	B0207.1
WBGene00000232	1669.55	0.191904	0.152328	0.576624	NS	B0207.12	avr-14
WBGene00015504	369.559	-0.0210597	0.875247	0.97512	NS	C06A5.6	C06A5.6
WBGene00015501	2272.35	0.0293442	0.70853	0.936326	NS	C06A5.3	C06A5.3
WBGene00004803	238.417	0.383488	0.00952804	0.12298	NS	C06A5.11	sir-2.4
WBGene00006823	5975.06	0.0423106	0.656907	0.915232	NS	C06A5.7	unc-94
WBGene00044414	27.8666	0.102253	0.613175	0.902465	NS	C06A5.12	C06A5.12
WBGene00015500	6.0029	0.0484952	0.735196	NA	NS	C06A5.2	C06A5.2
WBGene00015505	29.0397	-0.182122	0.368766	0.780344	NS	C06A5.8	C06A5.8
WBGene00004380	181.3	-0.184616	0.243535	0.678117	NS	C06A5.9	rnf-1
WBGene00015499	2186.73	-0.00978336	0.904205	0.980002	NS	C06A5.1	C06A5.1
WBGene00000814	1185.66	-0.0061535	0.951623	0.990569	NS	B0025.2	csn-2
WBGene00194700	32.8564	0.00581453	0.977108	0.995509	NS	B0025.5	B0025.5
WBGene00015001	136.324	0.0868591	0.61247	0.902314	NS	B0025.4	B0025.4
WBGene00006932	2387.22	-0.0976793	0.238578	0.675383	NS	B0025.1	vps-34
WBGene00016155	97.3301	-0.648496	0.000361905	0.0113785	down0.5	C27A12.4	C27A12.4
WBGene00006492	394.384	-0.0875675	0.505523	0.858474	NS	C27A12.3	tag-146
WBGene00016154	567.591	0.0857709	0.437348	0.824096	NS	C27A12.2	C27A12.2
WBGene00000429	40.4636	0.167096	0.41049	0.806388	NS	C27A12.5	ceh-2
WBGene00016156	375.85	0.0442415	0.716413	0.938273	NS	C27A12.6	C27A12.6
WBGene00016157	1019.92	-0.0556373	0.535631	0.871694	NS	C27A12.7	C27A12.7
WBGene00016158	1336.04	-0.0554742	0.564135	0.88516	NS	C27A12.8	ari-1
WBGene00016159	553.089	-0.168596	0.145234	0.563233	NS	C27A12.9	C27A12.9
WBGene00023409	129.369	-0.144278	0.436476	0.82398	NS	C27A12.10	mbd-2
WBGene00022749	1502.63	0.0805012	0.423434	0.814126	NS	ZK484.3	ZK484.3
WBGene00022750	2243.08	0.0594851	0.473013	0.844857	NS	ZK484.4	ZK484.4
WBGene00001819	7839.89	-0.303594	0.00833523	0.112764	NS	ZK484.2	haf-9
WBGene00022751	0.439829	-0.0394899	0.292279	NA	NS	ZK484.5	ZK484.5
WBGene00022752	17.5868	0.183158	0.335504	NA	NS	ZK484.6	ZK484.6
WBGene00022748	12891.8	-0.0300343	0.667195	0.920606	NS	ZK484.1	ZK484.1
WBGene00022753	0.651836	0.0128823	0.795621	NA	NS	ZK484.7	ZK484.7
WBGene00022754	0	NA	NA	NA	NS	ZK484.8	nspd-1
WBGene00020840	0.501997	-0.0150551	0.697633	NA	NS	T27A3.4	T27A3.4
WBGene00020841	0.191354	-0.00748388	0.780292	NA	NS	T27A3.5	T27A3.5
WBGene00006044	0	NA	NA	NA	NS	T27A3.3	ssp-16
WBGene00044611	24.6775	-0.0869958	0.652297	NA	NS	T27A3.8	T27A3.8
WBGene00020842	476.441	-0.0589747	0.654746	0.914491	NS	T27A3.6	T27A3.6
WBGene00020843	253.139	-0.108543	0.435483	0.823699	NS	T27A3.7	T27A3.7
WBGene00020839	992.935	-0.339979	0.000848053	0.0216639	down	T27A3.2	usp-5
WBGene00020838	4680.94	-0.0507906	0.492005	0.852539	NS	T27A3.1	T27A3.1
WBGene00003878	1064.44	0.144747	0.245591	0.679895	NS	F56F4.5	pept-3
WBGene00018981	2.56382	-0.0393392	0.701239	NA	NS	F56F4.4	F56F4.4
WBGene00018982	0.249152	0.00516385	0.847377	NA	NS	F56F4.6	abt-6
WBGene00018980	0	NA	NA	NA	NS	F56F4.3	F56F4.3
WBGene00018979	0	NA	NA	NA	NS	F56F4.2	ttr-55
WBGene00050896	0	NA	NA	NA	NS	F56F4.9	ttr-56
WBGene00018978	0.399209	0	1	NA	NS	F56F4.1	ttr-58
WBGene00045498	7.41245	0.00579742	0.963404	NA	NS	F56F4.8	F56F4.8
WBGene00020379	619.44	0.148905	0.290371	0.719318	NS	T09B4.5	T09B4.5
WBGene00020380	22.4972	0.178424	0.350248	NA	NS	T09B4.6	T09B4.6
WBGene00020381	98.0849	-0.230001	0.247646	0.682187	NS	T09B4.7	T09B4.7
WBGene00020382	2693.77	0.198298	0.130774	0.537603	NS	T09B4.8	T09B4.8
WBGene00020378	119.529	-0.121788	0.494872	0.853524	NS	T09B4.4	T09B4.4
WBGene00020377	77.1687	0.335663	0.0871499	0.448313	NS	T09B4.3	T09B4.3
WBGene00020383	1932.4	-0.300044	0.0282812	0.245625	NS	T09B4.9	T09B4.9
WBGene00000500	721.236	-0.0490543	0.64565	0.911731	NS	T09B4.10	chn-1
WBGene00020376	228.378	-0.0836607	0.590671	0.894374	NS	T09B4.2	T09B4.2
WBGene00020375	356.629	-0.00596332	0.966543	0.994813	NS	T09B4.1	pigv-1
WBGene00020259	885.232	-0.103487	0.296769	0.724639	NS	T05E7.3	T05E7.3
WBGene00020260	323.152	0.162668	0.198829	0.635102	NS	T05E7.4	T05E7.4
WBGene00000632	2.92983	-0.0234455	0.831278	NA	NS	T05E7.2	col-55
WBGene00020261	58.2401	0.0501769	0.72548	0.941079	NS	T05E7.5	vet-1
WBGene00020258	1039.63	-0.54956	0.000153065	0.00571896	down0.5	T05E7.1	T05E7.1
WBGene00020347	6724.7	-0.265039	0.0151291	0.167292	NS	T08B2.7	T08B2.7
WBGene00020348	215.453	-0.225101	0.181191	0.614599	NS	T08B2.8	mrpl-23
WBGene00001497	1446.45	0.00520212	0.952004	0.990569	NS	T08B2.9	fars-1
WBGene00206356	49.3093	0.151281	0.451137	0.832559	NS	T08B2.15	T08B2.15
WBGene00020346	2666.77	0.183323	0.0109268	0.135088	NS	T08B2.5	T08B2.5
WBGene00004486	16496.1	-0.204148	0.0219939	0.210244	NS	T08B2.10	rps-17
WBGene00020349	15.9467	0.0571956	0.766495	NA	NS	T08B2.11	T08B2.11
WBGene00020345	47.1953	0.00337003	0.986669	0.99784	NS	T08B2.4	T08B2.4
WBGene00020344	20.59	0.0728974	0.700416	NA	NS	WBGene00020344	T08B2.3
WBGene00020350	0.72298	0.0105844	0.839429	NA	NS	T08B2.12	T08B2.12
WBGene00000633	2.48478	-0.208907	0.0455805	NA	NS	T08B2.2	col-56
WBGene00016752	0.865875	0.0668238	0.22143	NA	NS	C48E7.7	C48E7.7
WBGene00016751	1714.18	0.133962	0.213338	0.649775	NS	C48E7.6	C48E7.6
WBGene00005000	115.423	0.171386	0.364002	0.776258	NS	C48E7.10	spp-15
WBGene00000583	223.994	-0.0167183	0.908607	0.980988	NS	C48E7.5	cof-2
WBGene00016754	70.0286	-0.0987012	0.611277	0.902246	NS	C48E7.11	cebp-2
WBGene00003059	129.082	0.0890792	0.630533	0.906657	NS	C48E7.3	lpd-2
WBGene00016750	595.552	0.024426	0.839268	0.967888	NS	C48E7.2	C48E7.2
WBGene00016749	1776.86	0.00929896	0.930972	0.987145	NS	C48E7.1	C48E7.1
WBGene00016753	3.59084	0.0920395	0.406504	NA	NS	C48E7.8	oac-9
WBGene00006689	0.186263	0	1	NA	NS	C48E7.9	twk-37
WBGene00015688	0.0670027	0	1	NA	NS	C10G11.8	C10G11.8
WBGene00015689	0.118579	0	1	NA	NS	C10G11.9	C10G11.9
WBGene00015687	3007.05	0.0303461	0.829757	0.967223	NS	C10G11.7	C10G11.7
WBGene00015686	498.307	0.0442356	0.730002	0.942681	NS	C10G11.6	C10G11.6
WBGene00004068	2029.24	-0.507191	1.52757e-05	0.000873042	down0.5	C10G11.5	pnk-1
WBGene00005272	18.5578	-0.115603	0.544446	NA	NS	C10G11.4	srh-49
WBGene00005274	7.92989	-0.241807	0.0992398	NA	NS	C10G11.3	srh-51
WBGene00005273	21.954	0.180973	0.354987	NA	NS	C10G11.2	srh-50
WBGene00015690	4.61323	0.0763832	0.554015	NA	NS	C10G11.10	C10G11.10
WBGene00015685	0.261935	0.00516385	0.847377	NA	NS	C10G11.1	C10G11.1
WBGene00017817	0.112011	0	1	NA	NS	F26B1.5	F26B1.5
WBGene00000634	3.20724	0.110233	0.330145	NA	NS	F26B1.4	col-58
WBGene00005171	15.2492	0.0204835	0.914313	NA	NS	F26B1.6	srg-14
WBGene00002073	221.02	-0.259217	0.0940729	0.465464	NS	F26B1.3	ima-2
WBGene00017816	1382.82	-0.0629439	0.486001	0.84905	NS	F26B1.2	F26B1.2
WBGene00002601	234.808	0.0557383	0.692879	0.929986	NS	F26B1.7	let-381
WBGene00017815	2.7967	0.000806939	0.993991	NA	NS	F26B1.1	F26B1.1
WBGene00194703	0	NA	NA	NA	NS	F26B1.8	F26B1.8
WBGene00000254	7980.17	0.133528	0.117652	0.514555	NS	K04F10.4	bli-4
WBGene00003499	90.6169	-0.233503	0.214932	0.650097	NS	K04F10.6	mut-2
WBGene00019396	240.45	0.17905	0.228841	0.663384	NS	K04F10.3	K04F10.3
WBGene00019395	178.689	0.239039	0.123536	0.522913	NS	K04F10.2	K04F10.2
WBGene00019394	267.765	-0.0957555	0.558669	0.883118	NS	K04F10.1	K04F10.1
WBGene00019399	1614.77	-0.230366	0.0164952	0.17473	NS	K04F10.7	K04F10.7
WBGene00022586	10.4469	-0.0366051	0.813853	NA	NS	ZC308.4	ZC308.4
WBGene00001596	5416.1	-0.0548723	0.573785	0.888543	NS	ZC308.1	gld-2
WBGene00022592	1442.47	0.117356	0.261534	0.691696	NS	ZC328.2	ZC328.2
WBGene00022591	13.0672	-0.089059	0.610573	NA	NS	ZC328.1	cuti-1
WBGene00022594	1.43005	0.0506317	0.516217	NA	NS	ZC328.5	ZC328.5
WBGene00004721	183.317	-0.129306	0.448821	0.831095	NS	ZC328.4	san-1
WBGene00022593	2218.87	0.0465779	0.702652	0.935218	NS	ZC328.3	ZC328.3
WBGene00019992	1.19867	0.0799325	0.249177	NA	NS	R10A10.1	R10A10.1
WBGene00019993	125.583	0.162939	0.338689	0.75972	NS	R10A10.2	rbx-2
WBGene00018156	1199.81	-0.0150312	0.866608	0.973986	NS	F37E3.1	ncbp-1
WBGene00018157	67.6555	0.097376	0.620885	0.904189	NS	F37E3.2	lron-6
WBGene00018158	1.37328	0.0210187	0.76477	NA	NS	F37E3.3	comp-1
WBGene00004924	8600.19	0.271747	0.0458699	0.320069	NS	T23H2.2	snt-4
WBGene00020742	654.071	-0.277561	0.0256502	0.230917	NS	T23H2.3	T23H2.3
WBGene00003798	3681.77	-0.141306	0.0929721	0.462392	NS	T23H2.1	npp-12
WBGene00020743	59.5898	0.331338	0.0943709	0.465924	NS	T23H2.4	mam-8
WBGene00004273	1203.02	0.108007	0.26072	0.690748	NS	T23H2.5	rab-10
WBGene00019432	443.915	-0.466668	0.000799953	0.0206558	down	K06A5.4	knl-2
WBGene00019433	1614.37	-0.482355	4.85321e-06	0.000325672	down	K06A5.6	acdh-3
WBGene00019431	3.35947	0.0466499	0.663624	NA	NS	K06A5.3	K06A5.3
WBGene00019430	10.7739	0.115538	0.511128	NA	NS	K06A5.2	K06A5.2
WBGene00000386	295.345	-0.0722029	0.641189	0.911027	NS	K06A5.7	cdc-25.1
WBGene00019429	377.704	-0.162067	0.233218	0.668433	NS	K06A5.1	K06A5.1
WBGene00019434	1641.52	0.131236	0.210667	0.648764	NS	K06A5.8	nmtn-1
WBGene00016945	637.213	0.230179	0.0645175	0.386761	NS	C55B7.6	sulp-1
WBGene00000937	296.113	-0.111558	0.40464	0.805102	NS	C55B7.8	dbr-1
WBGene00007018	246.031	-0.764534	3.02342e-07	3.02074e-05	down0.5	C55B7.9	mdt-18
WBGene00016944	400.869	-0.499776	0.000163072	0.0059807	down	C55B7.5	uri-1
WBGene00016943	20199	-1.09719	2.25588e-08	2.83523e-06	down1	C55B7.4	acdh-1
WBGene00016942	327.977	-0.613893	0.000757876	0.019734	down0.5	C55B7.3	C55B7.3
WBGene00016946	5.27539	-0.168344	0.207671	NA	NS	C55B7.10	C55B7.10
WBGene00001627	351.512	-0.000720686	0.995693	0.998992	NS	C55B7.2	gly-2
WBGene00016947	132.622	0.0419707	0.800087	0.960496	NS	C55B7.11	C55B7.11
WBGene00001599	85.1456	0.0299458	0.86981	0.974432	NS	C55B7.1	glh-2
WBGene00000483	13.8913	0.348886	0.0612435	NA	NS	C55B7.12	che-1
WBGene00020415	35.0876	-0.0232321	0.908906	0.980988	NS	T10E9.5	T10E9.5
WBGene00020414	0.50964	0	1	NA	NS	T10E9.4	T10E9.4
WBGene00020416	2.21171	0.00142591	0.98699	NA	NS	T10E9.6	T10E9.6
WBGene00020417	3849.06	-0.362692	7.8015e-05	0.00338052	down	T10E9.7	nuo-2
WBGene00020413	434.794	-0.008561	0.950893	0.990541	NS	T10E9.3	T10E9.3
WBGene00020418	99.6737	-0.20853	0.277766	0.705314	NS	T10E9.8	T10E9.8
WBGene00020412	214.738	-0.121346	0.406229	0.805489	NS	T10E9.2	T10E9.2
WBGene00020411	163.974	-0.139345	0.428428	0.818497	NS	T10E9.1	T10E9.1
WBGene00020419	29.4071	-0.240818	0.233849	0.669307	NS	T10E9.9	acdh-4
WBGene00019005	151.533	-0.0170474	0.918601	0.98417	NS	F57B10.8	F57B10.8
WBGene00019006	323.624	-0.186812	0.183843	0.618651	NS	F57B10.9	F57B10.9
WBGene00019007	1542.73	-0.313008	0.00134708	0.0306917	down	F57B10.14	F57B10.14
WBGene00000896	527.935	-0.12692	0.285294	0.713658	NS	F57B10.10	dad-1
WBGene00006607	2550.48	-0.171377	0.0846841	0.442206	NS	F57B10.7	tre-1
WBGene00019004	533.944	-0.25847	0.0378821	0.288512	NS	F57B10.6	xpg-1
WBGene00019003	526.252	-0.160177	0.204609	0.642702	NS	F57B10.5	F57B10.5
WBGene00000236	156.222	-0.18158	0.262426	0.692139	NS	F57B10.11	bag-1
WBGene00003184	24.5673	0.3041	0.125719	NA	NS	F57B10.12	mei-2
WBGene00019002	124.038	0.0403501	0.833566	0.967426	NS	F57B10.4	F57B10.4
WBGene00019001	13253.5	-0.314222	0.00839892	0.113285	NS	F57B10.3	ipgm-1
WBGene00002783	8506.85	0.154876	0.0256631	0.230917	NS	F57B10.1	let-607
WBGene00006624	264.998	0.105862	0.568661	0.887203	NS	F48A9.3	try-6
WBGene00018582	412.007	0.116301	0.358567	0.773198	NS	F48A9.2	F48A9.2
WBGene00018581	1161.92	0.153092	0.156367	0.581788	NS	F48A9.1	F48A9.1
WBGene00017067	143.259	0.140765	0.441646	0.827005	NS	D2092.6	D2092.6
WBGene00017066	2786.3	0.0405438	0.678267	0.923997	NS	D2092.5	maco-1
WBGene00017065	2531.38	-0.152021	0.101622	0.482973	NS	D2092.4	D2092.4
WBGene00006645	6.90305	-0.16211	0.295542	NA	NS	D2092.7	tsp-19
WBGene00017068	4.0737	0.155108	0.206832	NA	NS	D2092.8	D2092.8
WBGene00000050	52.3035	-0.12591	0.530543	0.869104	NS	D2092.3	acr-11
WBGene00017064	672.908	-0.0577114	0.589736	0.89409	NS	D2092.2	ppfr-2
WBGene00044610	9.29733	-0.147531	0.365389	NA	NS	D2092.10	D2092.10
WBGene00017063	955.428	0.134046	0.226432	0.66092	NS	D2092.1	D2092.1
WBGene00006625	2.51952	-0.0685472	0.477205	NA	NS	ZC581.6	try-7
WBGene00195178	2.8609	-0.000633305	0.995114	NA	NS	ZC581.10	ZC581.10
WBGene00022633	590.814	-0.0679401	0.609648	0.901857	NS	ZC581.3	ZC581.3
WBGene00022632	30.5839	0.105709	0.601676	0.897343	NS	ZC581.2	ZC581.2
WBGene00022634	17.2148	-0.0591618	0.752932	NA	NS	ZC581.7	ZC581.7
WBGene00022631	164.21	0.158372	0.316904	0.73958	NS	ZC581.1	nekl-2
WBGene00022635	1472.93	0.36659	0.000597497	0.0163469	up	ZC581.9	ZC581.9
WBGene00015907	20.3681	0.194819	0.319744	NA	NS	C17F3.1	C17F3.1
WBGene00015908	16.9134	-0.181793	0.302632	NA	NS	C17F3.3	C17F3.3
WBGene00020712	208.734	0.0956849	0.587097	0.892976	NS	T23B3.4	ckr-1
WBGene00020713	0.570462	-0.02184	0.641963	NA	NS	T23B3.5	T23B3.5
WBGene00020714	255.741	0.209224	0.173898	0.609651	NS	T23B3.6	T23B3.6
WBGene00020711	18.1736	-0.0247352	0.894969	NA	NS	T23B3.3	rmd-5
WBGene00020710	716.706	0.177924	0.0916769	0.460021	NS	T23B3.2	T23B3.2
WBGene00020709	987.785	-0.134509	0.185541	0.621505	NS	T23B3.1	T23B3.1
WBGene00020933	886.102	-0.286212	0.00556154	0.0859267	NS	W02D3.4	W02D3.4
WBGene00003170	351.582	-0.497429	0.000743844	0.0194815	down	W02D3.3	mec-6
WBGene00002258	9207.04	-0.60883	2.00176e-08	2.5714e-06	down0.5	W02D3.5	lbp-6
WBGene00007057	33.3297	0.232098	0.248013	0.682411	NS	W02D3.6	ant-1.2
WBGene00002257	842.263	-0.226087	0.0786541	0.427604	NS	W02D3.7	lbp-5
WBGene00004883	296.83	-0.11146	0.432054	0.820781	NS	W02D3.8	smg-5
WBGene00020932	3965.36	-0.0354405	0.642836	0.911186	NS	W02D3.2	dhod-1
WBGene00020931	5495.36	0.0184823	0.801351	0.960509	NS	W02D3.1	cytb-5.2
WBGene00020937	84.6111	-0.13261	0.483946	0.848164	NS	W02D3.12	W02D3.12
WBGene00006773	1458.11	-0.0504713	0.689154	0.928231	NS	W02D3.9	unc-37
WBGene00020935	924.586	-0.140744	0.209261	0.647881	NS	W02D3.10	fnci-1
WBGene00020936	942.048	-0.0886844	0.437348	0.824096	NS	W02D3.11	hrpf-1
WBGene00001682	1923.34	0.0529065	0.580532	0.891404	NS	F08B6.2	gpc-2
WBGene00017240	196.968	-0.105244	0.498083	0.855188	NS	F08B6.3	calu-2
WBGene00017239	95.2405	-0.164069	0.389632	0.796267	NS	F08B6.1	F08B6.1
WBGene00006819	36250.8	-0.15559	0.100019	0.479767	NS	F08B6.4	unc-87
WBGene00004111	1307.43	0.0354195	0.69703	0.932273	NS	C37A2.5	pqn-21
WBGene00000871	194.645	0.032551	0.824204	0.964872	NS	C37A2.4	cye-1
WBGene00016491	6.35423	-0.0334798	0.815642	NA	NS	C37A2.3	acdh-5
WBGene00016492	40.3282	0.26351	0.194044	0.63006	NS	C37A2.6	C37A2.6
WBGene00016493	7016.61	-0.126093	0.202827	0.640425	NS	C37A2.7	C37A2.7
WBGene00004110	4058.55	0.00737774	0.929178	0.987141	NS	C37A2.2	pqn-20
WBGene00016494	507.582	0.0309789	0.792388	0.958843	NS	C37A2.8	C37A2.8
WBGene00017098	890.982	0.133751	0.289943	0.719318	NS	E02D9.1	E02D9.1
WBGene00019324	3100.54	0.0721473	0.464879	0.840321	NS	K02F2.5	K02F2.5
WBGene00006740	31.9754	-0.212489	0.287701	0.7165	NS	K02F2.4	tofu-3
WBGene00019323	3261.13	-0.0226452	0.792419	0.958843	NS	K02F2.3	teg-4
WBGene00004778	919.32	0.0804527	0.430701	0.820132	NS	K02F2.6	ser-3
WBGene00019322	44905.6	-0.26415	0.00199322	0.0409558	down	K02F2.2	ahcy-1
WBGene00001056	2457.14	-0.156049	0.067977	0.398467	NS	K02F2.1	dpf-3
WBGene00001075	8.93956	-0.0704202	0.667096	NA	NS	H27M09.4	dpy-14
WBGene00019248	0.689702	-0.0206607	0.686904	NA	NS	H27M09.5	H27M09.5
WBGene00019247	30.6466	-0.0969463	0.632925	0.90766	NS	H27M09.3	syp-4
WBGene00019246	690.68	0.12403	0.268334	0.698149	NS	H27M09.2	rpb-5
WBGene00019245	344.137	0.0621137	0.634743	0.908401	NS	H27M09.1	sacy-1
WBGene00001598	460.161	-0.129595	0.287133	0.716003	NS	T21G5.3	glh-1
WBGene00044898	84.3623	-1.19595	2.50416e-09	3.97366e-07	down1	T21G5.6	T21G5.6
WBGene00020660	17.6271	-0.466975	0.0141144	NA	NS	T21G5.2	T21G5.2
WBGene00020661	9.04493	-0.138385	0.396408	NA	NS	T21G5.4	smz-2
WBGene00020659	19.7539	-0.142484	0.445118	NA	NS	T21G5.1	T21G5.1
WBGene00006423	4506.55	0.0995843	0.203351	0.641435	NS	T21G5.5	asd-2
WBGene00016742	250.818	0.187635	0.231629	0.667049	NS	C48B6.4	C48B6.4
WBGene00016743	1.89415	-0.018043	0.844639	NA	NS	C48B6.5	srb-15
WBGene00004879	6316.72	-0.107983	0.214453	0.649775	NS	C48B6.6	smg-1
WBGene00016741	609.263	0.0332737	0.754048	0.948525	NS	C48B6.3	C48B6.3
WBGene00016740	348.049	0.268632	0.0499663	0.334298	NS	C48B6.2	C48B6.2
WBGene00016744	205.106	0.28562	0.0709328	0.406163	NS	C48B6.8	bbs-9
WBGene00016746	506.84	0.0514545	0.66791	0.920606	NS	C48B6.10	C48B6.10
WBGene00016745	146.715	0.252193	0.119053	0.517724	NS	C48B6.9	C48B6.9
WBGene00020399	730.844	-0.131414	0.250937	0.685061	NS	T10B11.3	ztf-4
WBGene00020398	1330.64	-0.0867889	0.414613	0.808915	NS	T10B11.2	T10B11.2
WBGene00020400	4.27171	0.0117937	0.926139	NA	NS	T10B11.4	T10B11.4
WBGene00020401	37.0867	-0.290132	0.15281	0.577017	NS	T10B11.5	T10B11.5
WBGene00020402	743.075	-0.163748	0.159074	0.586817	NS	T10B11.6	T10B11.6
WBGene00020403	562.399	-0.208798	0.0732157	0.412159	NS	T10B11.7	T10B11.7
WBGene00020397	310.069	-0.107531	0.419123	0.811894	NS	T10B11.1	pcbd-1
WBGene00020404	49.3116	0.18225	0.368289	0.779702	NS	T10B11.8	T10B11.8
WBGene00016260	2292.47	0.0900122	0.370882	0.7815	NS	C30F12.1	C30F12.1
WBGene00016261	610.087	-0.225326	0.176724	0.611557	NS	C30F12.2	C30F12.2
WBGene00016262	249.074	0.596502	8.70521e-05	0.00367288	up0.5	C30F12.3	C30F12.3
WBGene00016263	33.7673	-0.216096	0.287067	0.716003	NS	C30F12.4	C30F12.4
WBGene00016266	1963.27	-0.362138	8.20602e-05	0.00352094	down	C30F12.7	idhg-2
WBGene00016265	353.853	0.00717187	0.958406	0.992398	NS	C30F12.6	nmur-4
WBGene00016264	2545.38	0.0734295	0.428765	0.81852	NS	C30F12.5	C30F12.5
WBGene00010370	1230.1	-0.0471589	0.66126	0.917223	NS	H06O01.3	ctg-1
WBGene00010369	2370.72	-0.197929	0.0202031	0.199857	NS	H06O01.2	chd-1
WBGene00003964	15882.4	-0.113827	0.307873	0.733413	NS	H06O01.1	pdi-3
WBGene00008852	4905	0.0864032	0.246495	0.680737	NS	F15C11.2	ubql-1
WBGene00004773	9234.32	0.0527669	0.626375	0.906092	NS	F15C11.1	sem-4
WBGene00044988	82.9528	-0.465873	0.0124152	0.147863	NS	W01A8.8	W01A8.8
WBGene00012164	32.0244	-0.0313237	0.877314	0.97512	NS	W01A8.2	W01A8.2
WBGene00007024	2980.39	-0.0563332	0.551264	0.880004	NS	W01A8.1	mdt-28
WBGene00012165	51.5991	-0.0917992	0.642618	0.911186	NS	W01A8.3	cutl-6
WBGene00012166	2695.14	-0.283649	0.00138031	0.0309494	down	W01A8.4	nuo-6
WBGene00012167	251.84	-0.0322445	0.816906	0.963687	NS	W01A8.5	tofu-5
WBGene00012168	224.443	0.18132	0.264283	0.693645	NS	W01A8.6	W01A8.6
WBGene00002198	86.3875	-0.0143179	0.942307	0.989015	NS	F22D6.1	kin-14
WBGene00009050	19494	0.106759	0.222683	0.657921	NS	F22D6.2	F22D6.2
WBGene00003815	1360.45	0.138566	0.125115	0.525885	NS	F22D6.3	nars-1
WBGene00009051	1438.91	-0.328131	0.00259022	0.0494931	down	F22D6.4	nduf-6
WBGene00004186	938.342	-0.0350467	0.720782	0.938916	NS	F22D6.5	prpf-4
WBGene00009052	594.137	-0.144047	0.174992	0.610594	NS	F22D6.6	ekl-1
WBGene00043279	40.2382	-0.241449	0.232848	0.6682	NS	F22D6.8	F22D6.8
WBGene00009054	49.0809	-0.271576	0.174521	0.610463	NS	F22D6.9	F22D6.9
WBGene00009056	52.6558	-0.0788677	0.692531	0.929985	NS	F22D6.15	F22D6.15
WBGene00000636	8.8283	-0.136105	0.402683	NA	NS	F22D6.10	col-60
WBGene00001643	218.421	0.324323	0.0297154	0.253051	NS	F22D6.11	gly-18
WBGene00001644	321.347	-0.0668567	0.671297	0.922364	NS	F22D6.12	gly-19
WBGene00010740	446.793	0.0351296	0.79008	0.958241	NS	K10D3.6	K10D3.6
WBGene00001614	93.8544	0.256445	0.174954	0.610594	NS	K10D3.1	glr-3
WBGene00219281	1.47619	-0.0263475	0.722562	NA	NS	K10D3.8	K10D3.8
WBGene00006753	7680.4	0.177717	0.0319224	0.262863	NS	K10D3.2	unc-14
WBGene00006394	16.2281	0.0470918	0.800182	NA	NS	K10D3.3	taf-11.2
WBGene00010738	2062.09	0.0810676	0.338075	0.759636	NS	K10D3.4	K10D3.4
WBGene00010427	4948.87	0.062128	0.483266	0.848164	NS	H37N21.1	hpo-11
WBGene00010645	1123.84	-0.347389	0.000248045	0.00838505	down	K07G5.6	fecl-1
WBGene00010641	1967.54	-0.136181	0.114515	0.507951	NS	K07G5.1	crml-1
WBGene00006963	84.0786	0.177916	0.335971	0.757854	NS	K07G5.2	xpa-1
WBGene00010642	189.942	-0.0472933	0.785947	0.956571	NS	K07G5.3	mks-6
WBGene00010643	153.833	0.0534646	0.739381	0.945042	NS	K07G5.4	K07G5.4
WBGene00010644	218.086	-0.020446	0.904584	0.980002	NS	K07G5.5	K07G5.5
WBGene00010870	413.626	-0.0369693	0.789696	0.958117	NS	M05B5.2	M05B5.2
WBGene00194654	38.3428	0.33645	0.0973874	0.473256	NS	M05B5.7	M05B5.7
WBGene00010869	21.3425	0.0127349	0.94837	NA	NS	M05B5.1	M05B5.1
WBGene00010873	494.591	0.0255691	0.818578	0.963687	NS	M05B5.6	trpa-2
WBGene00010871	129.165	0.277117	0.115825	0.509962	NS	M05B5.3	M05B5.3
WBGene00010872	1087.36	0.118459	0.337838	0.759586	NS	M05B5.4	M05B5.4
WBGene00001949	509.859	0.0424864	0.759198	0.949444	NS	M05B5.5	hlh-2
WBGene00000637	102.399	0.14028	0.488827	0.851298	NS	C01H6.1	col-61
WBGene00007252	216.898	-0.027244	0.856537	0.972495	NS	C01H6.2	C01H6.2
WBGene00007253	87.6815	-0.137957	0.456903	0.835711	NS	C01H6.3	C01H6.3
WBGene00007254	186.502	-0.345006	0.0459821	0.32037	NS	C01H6.4	C01H6.4
WBGene00003622	173.094	-0.1203	0.448183	0.831095	NS	C01H6.5	nhr-23
WBGene00007255	29.6231	0.175302	0.386652	0.794268	NS	C01H6.6	C01H6.6
WBGene00007256	933.434	-0.154489	0.143534	0.560994	NS	C01H6.7	swsn-9
WBGene00007257	128.238	-0.263924	0.145481	0.56402	NS	C01H6.8	C01H6.8
WBGene00007258	157.444	-0.491526	0.00230072	0.0457701	down	C01H6.9	C01H6.9
WBGene00011062	32.8816	-0.0967762	0.633633	0.908133	NS	R06C7.2	R06C7.2
WBGene00011061	323.838	0.0104778	0.943135	0.989181	NS	R06C7.1	wago-1
WBGene00000963	1934.95	-0.0198316	0.880753	0.976014	NS	R06C7.3	dhp-1
WBGene00011063	56.5971	0.000830047	0.996699	0.998992	NS	R06C7.4	cpg-3
WBGene00011065	29.258	-0.24506	0.223923	0.659108	NS	R06C7.6	R06C7.6
WBGene00011064	889.491	-0.269788	0.00937028	0.121877	NS	R06C7.5	adsl-1
WBGene00003041	590.591	-0.134203	0.252812	0.685395	NS	R06C7.7	lin-61
WBGene00000275	530.788	-0.404374	0.0440214	0.311849	NS	R06C7.8	bub-1
WBGene00011066	80.8657	-0.0486752	0.797144	0.959823	NS	R06C7.9	ztf-15
WBGene00002348	76184.7	-0.195977	0.112902	0.505248	NS	R06C7.10	myo-1
WBGene00006656	600.066	-0.207369	0.128401	0.532912	NS	F21C3.1	twk-1
WBGene00009001	6.19183	-0.00990028	0.946341	NA	NS	F21C3.2	tyr-3
WBGene00077548	5.34922	0.0484061	0.709678	NA	NS	F21C3.7	F21C3.7
WBGene00009002	283.151	-0.333761	0.0257468	0.231415	NS	F21C3.3	hint-1
WBGene00004324	438.848	0.0285723	0.802139	0.960509	NS	F21C3.4	rde-2
WBGene00009004	344.701	0.0360612	0.784922	0.956317	NS	F21C3.5	pfd-6
WBGene00009005	3.20146	0.0880783	0.431162	NA	NS	F21C3.6	F21C3.6
WBGene00008762	265.277	0.00638248	0.969959	0.994813	NS	F13G3.1	ztf-2
WBGene00005131	61.6568	-0.00620501	0.974988	0.994987	NS	F13G3.2	srd-53
WBGene00008770	187.106	-0.310676	0.0476841	0.326856	NS	F13G3.12	F13G3.12
WBGene00008763	32.9137	-0.128862	0.524754	0.866606	NS	F13G3.3	F13G3.3
WBGene00008764	521.075	-0.130068	0.286848	0.716003	NS	F13G3.4	dylt-1
WBGene00008765	921.771	-0.200495	0.0761221	0.419932	NS	F13G3.5	ttx-7
WBGene00008766	288.729	-0.177884	0.196109	0.634399	NS	F13G3.6	F13G3.6
WBGene00008767	978.57	-0.0984451	0.322385	0.745343	NS	F13G3.7	F13G3.7
WBGene00008769	579.153	-0.141666	0.262421	0.692139	NS	F13G3.11	mrpl-13
WBGene00001136	78.2842	-0.167166	0.377605	0.78708	NS	F13G3.8	eat-5
WBGene00003236	311.314	-0.0608602	0.644721	0.911449	NS	F13G3.9	mif-3
WBGene00008768	336.823	-0.0698624	0.603334	0.898751	NS	F13G3.10	F13G3.10
WBGene00009915	2028.56	0.103304	0.245352	0.679895	NS	F52A8.1	F52A8.1
WBGene00001680	1618.92	0.0452516	0.615843	0.902684	NS	F52A8.2	gpb-2
WBGene00009916	53.4807	-0.080499	0.686245	0.927013	NS	F52A8.3	F52A8.3
WBGene00009917	1504.49	0.186498	0.147074	0.566598	NS	F52A8.4	glb-18
WBGene00009918	428.951	-0.305072	0.0294695	0.251891	NS	F52A8.5	F52A8.5
WBGene00009919	873.671	0.0099931	0.928027	0.986774	NS	F52A8.6	F52A8.6
WBGene00002136	322.698	0.0533678	0.731295	0.942681	NS	F07A5.1	inx-14
WBGene00008541	2.2551	-0.100869	0.26362	NA	NS	F07A5.2	F07A5.2
WBGene00008542	610.836	-0.0102281	0.939674	0.988714	NS	F07A5.3	scav-6
WBGene00008543	321.887	0.129657	0.393951	0.797924	NS	F07A5.4	F07A5.4
WBGene00006306	4937.19	0.258807	0.0124425	0.147863	NS	F07A5.5	sue-1
WBGene00006754	166819	-0.188026	0.0358501	0.279023	NS	F07A5.7	unc-15
WBGene00007597	106.408	0.110669	0.560085	0.883266	NS	C15A11.2	C15A11.2
WBGene00000612	35.0387	0.177687	0.381282	0.789039	NS	C15A11.1	col-35
WBGene00004944	1277.38	0.158871	0.239343	0.675384	NS	C15A11.3	sol-1
WBGene00007598	3.5508	-0.0175754	0.878672	NA	NS	C15A11.4	C15A11.4
WBGene00000596	14.7763	-0.128926	0.493782	NA	NS	C15A11.5	col-7
WBGene00000638	19.7143	0.0351364	0.855926	NA	NS	C15A11.6	col-62
WBGene00007599	2255.42	-0.11423	0.345768	0.764645	NS	C15A11.7	C15A11.7
WBGene00006752	13079	0.191143	0.0631669	0.383258	NS	ZK524.2	unc-13
WBGene00004958	16.8162	-0.239451	0.203533	NA	NS	ZK524.1	spe-4
WBGene00003074	609.491	-0.22168	0.0707569	0.405942	NS	ZK524.3	lars-2
WBGene00013994	2602.27	0.0875488	0.451307	0.832559	NS	ZK524.4	ZK524.4
WBGene00012136	4133.34	0.0851073	0.300476	0.726572	NS	T28F4.1	T28F4.1
WBGene00012137	140.783	0.15049	0.420255	0.812727	NS	T28F4.2	asic-2
WBGene00012138	5.52228	0.014479	0.916802	NA	NS	T28F4.3	T28F4.3
WBGene00012139	535.345	0.15495	0.165555	0.596468	NS	T28F4.4	T28F4.4
WBGene00012140	5029	-0.345987	0.0182896	0.187597	NS	T28F4.5	T28F4.5
WBGene00012141	1331.45	-0.298505	0.035445	0.278677	NS	T28F4.6	T28F4.6
WBGene00007042	6043.54	-0.0442918	0.593046	0.894674	NS	C26C6.1	pbrm-1
WBGene00007742	9.70286	-0.0861482	0.601106	NA	NS	C26C6.8	C26C6.8
WBGene00007740	1.86278	-0.0168259	0.856805	NA	NS	C26C6.6	C26C6.6
WBGene00007741	149.58	-0.0749175	0.666689	0.920606	NS	C26C6.7	glb-8
WBGene00077553	24.4323	0.0127286	0.947389	NA	NS	C26C6.10	C26C6.10
WBGene00007743	373.471	-0.00128047	0.993531	0.998992	NS	C26C6.9	C26C6.9
WBGene00001648	9094.31	0.078137	0.287711	0.7165	NS	C26C6.2	goa-1
WBGene00003552	61.5221	-0.0529374	0.787826	0.957315	NS	C26C6.3	nas-36
WBGene00007739	26.015	0.14973	0.458589	0.837116	NS	C26C6.4	C26C6.4
WBGene00000938	4115.79	0.0785359	0.463843	0.839548	NS	C26C6.5	dcp-66
WBGene00012029	40.4848	-0.219326	0.277067	0.704897	NS	T25G3.1	T25G3.1
WBGene00000496	174.329	0.0929166	0.572149	0.887924	NS	T25G3.2	chs-1
WBGene00012030	2372.96	0.167099	0.0408315	0.300784	NS	T25G3.3	T25G3.3
WBGene00012031	4271.73	-0.0372122	0.657394	0.915397	NS	T25G3.4	T25G3.4
WBGene00008411	724.224	-0.0258097	0.792878	0.959048	NS	D2030.1	mans-1
WBGene00008412	6689.93	0.0307315	0.701785	0.934778	NS	D2030.2	D2030.2
WBGene00008413	1222.23	0.277782	0.00679683	0.0979441	NS	D2030.3	D2030.3
WBGene00008414	1221.88	-0.305604	0.0023716	0.0468348	down	D2030.4	D2030.4
WBGene00008415	1975.55	-0.040381	0.84045	0.968309	NS	D2030.5	mce-1
WBGene00008421	145.166	0.189593	0.261092	0.691055	NS	D2030.12	D2030.12
WBGene00004178	1306.58	-0.194684	0.0954469	0.468887	NS	D2030.6	prg-1
WBGene00008417	64.1089	-0.287559	0.15146	0.575053	NS	D2030.7	D2030.7
WBGene00008420	95.4717	-0.0673644	0.709014	0.936326	NS	D2030.11	D2030.11
WBGene00008418	303.779	-0.229366	0.100285	0.479926	NS	D2030.8	D2030.8
WBGene00008419	3359.09	0.118798	0.109533	0.499853	NS	D2030.9	wdr-23
WBGene00000084	647.049	0.0285101	0.828799	0.966537	NS	D2030.10	aex-1
WBGene00003071	17790.3	0.0578619	0.446665	0.830065	NS	F29D11.1	lrp-1
WBGene00009254	1481.6	-0.0914041	0.365124	0.777148	NS	F29D11.2	capg-1
WBGene00009140	664.101	-0.101709	0.385365	0.792589	NS	F26A3.1	F26A3.1
WBGene00009141	394.249	-0.13451	0.285125	0.713524	NS	F26A3.2	ncbp-2
WBGene00004508	1376.51	-0.190684	0.039219	0.294372	NS	F26A3.8	rrf-1
WBGene00001214	286.178	-0.147224	0.355895	0.77205	NS	F26A3.3	ego-1
WBGene00009142	3296.66	0.0179927	0.872326	0.974432	NS	F26A3.4	F26A3.4
WBGene00009143	4.49389	0.0725577	0.526673	NA	NS	F26A3.5	F26A3.5
WBGene00009144	68.6835	0.155538	0.439977	0.82583	NS	F26A3.6	del-3
WBGene00009145	84.8125	0.168922	0.367525	0.779047	NS	F26A3.7	F26A3.7
WBGene00011975	643.844	-0.0764432	0.531941	0.87018	NS	T24B1.1	T24B1.1
WBGene00011972	960.082	-0.0163498	0.864495	0.973436	NS	T23G11.7	T23G11.7
WBGene00011970	1516.18	0.0158515	0.868377	0.974362	NS	T23G11.5	rlbp-1
WBGene00011971	869.933	0.00896729	0.937814	0.988302	NS	T23G11.6	lron-9
WBGene00011969	148.196	0.093654	0.584666	0.892545	NS	T23G11.4	T23G11.4
WBGene00001595	124.469	0.0157493	0.928884	0.987103	NS	T23G11.3	gld-1
WBGene00011973	1.15272	-0.024587	0.717274	NA	NS	T23G11.10	T23G11.10
WBGene00001647	35.9519	0.00526398	0.979275	0.996275	NS	T23G11.2	gna-2
WBGene00077728	45.5571	-0.122102	0.543363	0.875091	NS	T23G11.11	T23G11.11
WBGene00011968	42.2391	-0.18113	0.367983	0.779551	NS	T23G11.1	T23G11.1
WBGene00009187	5914.87	-1.02505	5.77393e-25	5.19192e-22	down1	F27D4.1	F27D4.1
WBGene00009188	2034.14	-0.00916242	0.918371	0.98417	NS	F27D4.2	lsy-22
WBGene00009191	198.78	-0.10754	0.482483	0.848164	NS	F27D4.7	F27D4.7
WBGene00009189	1165.58	-0.0350312	0.749886	0.948103	NS	F27D4.4	F27D4.4
WBGene00006518	2129.58	-0.194099	0.0121569	0.146535	NS	F27D4.5	tag-173
WBGene00077543	18.3888	-0.0489441	0.797226	NA	NS	F27D4.8	F27D4.8
WBGene00009190	1129.98	-0.00293502	0.97542	0.995044	NS	F27D4.6	F27D4.6
WBGene00010291	157.51	0.178811	0.316913	0.73958	NS	F58H10.1	F58H10.1
WBGene00003818	4663.76	0.149611	0.150982	0.573972	NS	H15N14.2	nsf-1
WBGene00000079	2347.08	-0.0475134	0.577438	0.890262	NS	H15N14.1	adr-1
WBGene00012151	33.9694	-0.159448	0.430237	0.819638	NS	VH15N14R.1	VH15N14R.1
WBGene00008397	436.572	0.0274578	0.817184	0.963687	NS	D2005.1	D2005.1
WBGene00008401	166.091	-0.077199	0.643589	0.911186	NS	D2005.6	D2005.6
WBGene00003746	1446.76	0.0519184	0.613879	0.902567	NS	D2005.2	nlp-8
WBGene00008398	777.589	0.113531	0.25773	0.688582	NS	D2005.3	D2005.3
WBGene00008399	171.203	0.0794221	0.612732	0.902314	NS	D2005.4	D2005.4
WBGene00086551	31.8568	0.0147337	0.941898	0.988982	NS	D2005.7	D2005.7
WBGene00008400	527.266	-0.352119	0.00270167	0.0509653	NS	D2005.5	drh-3
WBGene00009271	506.508	0.165523	0.224423	0.659108	NS	F30F8.2	glna-3
WBGene00009270	98.4212	-0.0912381	0.618096	0.903126	NS	F30F8.1	F30F8.1
WBGene00009272	271.142	0.00984094	0.945517	0.989181	NS	F30F8.3	gras-1
WBGene00009276	506.774	-0.00507054	0.964996	0.994565	NS	F30F8.9	F30F8.9
WBGene00009277	885.574	0.109089	0.245663	0.679895	NS	F30F8.10	F30F8.10
WBGene00009274	264.091	-0.00457594	0.975543	0.995084	NS	F30F8.5	F30F8.5
WBGene00006386	775.409	-0.014401	0.892865	0.977298	NS	F30F8.8	taf-5
WBGene00000163	1380.55	0.00824062	0.925732	0.986071	NS	R11A5.1	apb-3
WBGene00011230	1365.71	-0.00420603	0.963306	0.993506	NS	R11A5.2	nud-2
WBGene00011231	57.2802	-0.264298	0.193031	0.629344	NS	R11A5.3	R11A5.3
WBGene00011232	40986.1	-0.551621	5.24298e-05	0.00248131	down0.5	R11A5.4	pck-2
WBGene00011234	223.505	-0.313427	0.0566372	0.361782	NS	R11A5.6	R11A5.6
WBGene00011235	7663.09	-0.593297	5.05271e-06	0.000334073	down0.5	R11A5.7	suro-1
WBGene00010110	344.23	-0.109912	0.407933	0.805489	NS	F55D12.1	F55D12.1
WBGene00010111	479.783	0.130135	0.297383	0.72494	NS	F55D12.2	F55D12.2
WBGene00006790	17.3191	-0.0953726	0.61282	NA	NS	F55D12.4	unc-55
WBGene00010114	1.90971	-0.123297	0.182055	NA	NS	F55D12.6	F55D12.6
WBGene00010113	649.95	-0.102379	0.34587	0.764645	NS	F55D12.5	F55D12.5
WBGene00008991	228.717	-0.0197303	0.899487	0.97883	NS	F20G4.2	F20G4.2
WBGene00008990	1676.35	-0.000562183	0.994911	0.998992	NS	F20G4.1	smgl-1
WBGene00003777	5495.84	-0.235878	0.00159363	0.0343917	down	F20G4.3	nmy-2
WBGene00011912	1607.55	-0.00623339	0.946145	0.989412	NS	T22C1.1	T22C1.1
WBGene00011913	710.101	0.0224061	0.845223	0.970079	NS	T22C1.2	glb-26
WBGene00011914	437.931	0.00400849	0.976424	0.995286	NS	T22C1.3	T22C1.3
WBGene00011915	36.9726	-0.0885593	0.662743	0.918392	NS	T22C1.4	T22C1.4
WBGene00011916	211.347	-0.0533981	0.737303	0.944032	NS	T22C1.5	T22C1.5
WBGene00011917	383.11	-0.114756	0.378973	0.788338	NS	T22C1.6	T22C1.6
WBGene00002179	5436.17	0.130364	0.142305	0.55865	NS	T22C1.7	jph-1
WBGene00011918	0.362246	-0.00127717	0.963807	NA	NS	T22C1.8	T22C1.8
WBGene00011919	0.124251	-0.00748388	0.780292	NA	NS	T22C1.9	T22C1.9
WBGene00011921	0.177571	0.00516385	0.847377	NA	NS	T22C1.12	T22C1.12
WBGene00004318	3629.12	0.00326234	0.966512	0.994813	NS	T22C1.10	rbg-2
WBGene00011920	702.857	-0.0676209	0.555873	0.881689	NS	T22C1.11	T22C1.11
WBGene00010366	14.5096	0.13211	0.454768	NA	NS	H05L14.1	H05L14.1
WBGene00010367	355.576	-0.0240222	0.847423	0.970849	NS	H05L14.2	H05L14.2
WBGene00008315	241.885	0.14859	0.290432	0.719318	NS	C54G4.5	C54G4.5
WBGene00008314	84.1484	0.188178	0.3382	0.75964	NS	C54G4.4	C54G4.4
WBGene00008313	0.598024	-0.003139	0.947513	NA	NS	C54G4.3	C54G4.3
WBGene00008312	0.958024	0.024539	0.674935	NA	NS	C54G4.2	C54G4.2
WBGene00008311	9867.84	0.149996	0.0473183	0.325793	NS	C54G4.1	rskn-2
WBGene00008317	1762.19	0.0112317	0.916524	0.983326	NS	C54G4.7	C54G4.7
WBGene00008316	327.193	-0.115984	0.408826	0.805671	NS	C54G4.6	dod-18
WBGene00000869	12010.8	-0.42089	7.9551e-09	1.14147e-06	down	C54G4.8	cyc-1
WBGene00008318	175.473	-0.106635	0.507732	0.859784	NS	C54G4.9	C54G4.9
WBGene00010560	1534.56	0.000438044	0.996108	0.998992	NS	K04G2.1	iftb-1
WBGene00045192	967.686	-0.0693596	0.491492	0.852395	NS	K04G2.2	aho-3
WBGene00010562	652.058	0.0420026	0.718786	0.938461	NS	K04G2.3	cdc-48.3
WBGene00010563	199.963	-0.0293889	0.85341	0.971852	NS	K04G2.4	K04G2.4
WBGene00010564	1137.56	-0.241576	0.0224754	0.212735	NS	K04G2.5	ath-1
WBGene00010569	81.1647	0.234919	0.212142	0.649144	NS	K04G2.11	scbp-2
WBGene00010565	510.142	-0.118225	0.370992	0.7815	NS	K04G2.6	vacl-14
WBGene00077768	11.7332	-0.0457529	0.784212	NA	NS	K04G2.12	K04G2.12
WBGene00010566	142.24	0.0925767	0.583555	0.892449	NS	K04G2.7	K04G2.7
WBGene00000156	2421.02	-0.00148759	0.986023	0.99771	NS	K04G2.8	2001-04-01
WBGene00010567	1162.82	0.201228	0.0948546	0.467104	NS	K04G2.9	K04G2.9
WBGene00010568	26.7183	-0.0540432	0.771213	0.952532	NS	K04G2.10	K04G2.10
WBGene00008935	0.69067	-0.0229805	0.670185	NA	NS	F18C12.4	F18C12.4
WBGene00000485	1702.67	0.172982	0.180357	0.613843	NS	F18C12.1	che-3
WBGene00004378	5696.08	-0.0982195	0.18061	0.614238	NS	F18C12.2	rme-8
WBGene00008934	538.004	0.174217	0.150516	0.573329	NS	F18C12.3	F18C12.3
WBGene00005009	3011.05	-0.190567	0.0248276	0.226738	NS	C09H6.1	spr-4
WBGene00002999	2850.75	0.0598956	0.504697	0.858307	NS	C09H6.2	lin-10
WBGene00003136	443.705	-0.0732935	0.552397	0.880492	NS	C09H6.3	mau-2
WBGene00012113	4956.48	-0.0971285	0.469986	0.843486	NS	T28B8.1	T28B8.1
WBGene00012116	193.443	0.154776	0.397164	0.80044	NS	T28B8.5	del-4
WBGene00002101	566.701	0.242691	0.0710363	0.406163	NS	T28B8.2	ins-18
WBGene00044122	3.76789	-0.0608462	0.597566	NA	NS	T28B8.6	T28B8.6
WBGene00012114	189.494	0.121979	0.520951	0.865343	NS	T28B8.3	T28B8.3
WBGene00012115	23.3593	0.136916	0.48996	NA	NS	T28B8.4	T28B8.4
WBGene00023413	31.694	0.192136	0.339742	0.760453	NS	H31B20.2	H31B20.2
WBGene00008570	2997.17	0.20427	0.0941596	0.465722	NS	F08A10.1	kcnl-2
WBGene00023411	53.21	0.0801283	0.692924	0.929986	NS	F08A10.2	srz-3
WBGene00011379	11.8611	-0.0724645	0.678031	NA	NS	T02E1.7	T02E1.7
WBGene00011378	67.555	-0.378085	0.0534752	0.349001	NS	T02E1.6	T02E1.6
WBGene00000967	1152.97	-0.490015	0.000358156	0.0112869	down	T02E1.5	dhs-3
WBGene00011376	371.35	-0.344221	0.0169445	0.178136	NS	T02E1.3	gla-3
WBGene00011375	609.294	-0.130999	0.22945	0.6643	NS	T02E1.2	T02E1.2
WBGene00004966	5.66698	0.075656	0.60178	NA	NS	T02E1.1	spe-12
WBGene00013955	1035.8	0.00828719	0.945336	0.989181	NS	ZK265.1	kri-1
WBGene00011380	343.074	0.164626	0.271256	0.70008	NS	T02E1.8	T02E1.8
WBGene00013956	0.726811	0.0335001	0.5365	NA	NS	ZK265.3	ZK265.3
WBGene00000639	7.7155	-0.0867671	0.578657	NA	NS	ZK265.2	col-63
WBGene00000433	102.229	0.117036	0.514721	0.862169	NS	ZK265.4	ceh-8
WBGene00044094	661.187	0.194244	0.144502	0.56209	NS	ZK265.9	ZK265.9
WBGene00013958	354.405	0.118382	0.401126	0.803588	NS	ZK265.6	ZK265.6
WBGene00013957	170.215	0.0683546	0.686397	0.927013	NS	ZK265.5	sre-23
WBGene00013959	712.876	0.146271	0.231212	0.666509	NS	ZK265.7	ZK265.7
WBGene00013960	50.8174	0.184515	0.360854	0.773916	NS	ZK265.8	cutl-8
WBGene00011344	4433.32	-0.00615683	0.945284	0.989181	NS	T01G9.2	T01G9.2
WBGene00011345	809.763	-0.0252695	0.810199	0.962008	NS	T01G9.3	dma-1
WBGene00002196	2687.52	-0.107194	0.209116	0.647881	NS	T01G9.6	kin-10
WBGene00003788	531.654	-0.017153	0.882635	0.976014	NS	T01G9.4	npp-2
WBGene00003183	684.863	0.0828874	0.454249	0.834656	NS	T01G9.5	mei-1
WBGene00009920	29596.5	0.0878111	0.36755	0.779047	NS	F52B5.1	abts-1
WBGene00009923	53.7474	0.242703	0.220356	0.655856	NS	F52B5.7	F52B5.7
WBGene00009921	87.2786	0.029386	0.872872	0.974435	NS	F52B5.2	F52B5.2
WBGene00009922	845.491	-0.144691	0.146963	0.566598	NS	F52B5.3	F52B5.3
WBGene00000467	187.249	0.0081432	0.95825	0.992389	NS	F52B5.5	cep-1
WBGene00004439	5886.14	-0.15988	0.0937771	0.465287	NS	F52B5.6	rpl-25.2
WBGene00007911	239.953	-0.0988744	0.526667	0.866667	NS	C34B7.1	C34B7.1
WBGene00007914	714.059	0.00292062	0.97647	0.995286	NS	C34B7.4	mys-4
WBGene00007912	779.806	-0.0199541	0.841224	0.968688	NS	C34B7.2	C34B7.2
WBGene00007913	103.971	-0.110036	0.576198	0.889829	NS	C34B7.3	cyp-36A1
WBGene00006531	404.156	0.0109133	0.932546	0.987404	NS	F16D3.1	tba-5
WBGene00004684	1687.54	-0.0529111	0.549573	0.879921	NS	F16D3.2	rsd-6
WBGene00008887	931.747	0.00553541	0.95273	0.990628	NS	F16D3.4	tbcd-1
WBGene00008889	17.562	0.0266251	0.882638	NA	NS	F16D3.6	F16D3.6
WBGene00011827	2960.62	-0.0567984	0.497646	0.855039	NS	T19A6.1	T19A6.1
WBGene00008890	842.505	-0.0237721	0.848686	0.971314	NS	F16D3.7	ser-5
WBGene00003596	6760.75	0.247593	0.00375342	0.0646567	NS	T19A6.2	ngp-1
WBGene00011828	448.364	-0.127735	0.28114	0.708522	NS	T19A6.3	nepr-1
WBGene00011829	35.9038	0.055463	0.780688	0.95568	NS	T19A6.4	T19A6.4
WBGene00008529	1.62711	-0.0670452	0.33827	NA	NS	F02E9.3	F02E9.3
WBGene00008528	295.56	0.129836	0.427247	0.81756	NS	F02E9.1	F02E9.1
WBGene00003014	2352.16	-0.0327452	0.676195	0.923036	NS	F02E9.2	lin-28
WBGene00008531	365.018	0.1749	0.16525	0.595742	NS	F02E9.7	F02E9.7
WBGene00004117	1815.95	-0.122025	0.122052	0.520188	NS	F02E9.4	sin-3
WBGene00008530	1711.54	0.0224825	0.787068	0.956852	NS	F02E9.5	F02E9.5
WBGene00008533	414.997	-0.298796	0.0108852	0.134697	NS	F02E9.10	F02E9.10
WBGene00008532	1722.61	-0.365761	1.71728e-05	0.00096111	down	F02E9.9	dpt-1
WBGene00004931	788.853	-0.50402	7.6588e-06	0.000484309	down0.5	F10D11.1	sod-2
WBGene00008648	462.382	0.0071109	0.95113	0.990541	NS	F10D11.2	F10D11.2
WBGene00008649	5.24573	-0.0817582	0.532926	NA	NS	F10D11.3	F10D11.3
WBGene00008650	0.125449	0	1	NA	NS	F10D11.4	F10D11.4
WBGene00008651	1.48603	-0.127003	0.0817087	NA	NS	F10D11.5	F10D11.5
WBGene00008652	93.2871	0.102264	0.583917	0.892449	NS	F10D11.6	F10D11.6
WBGene00006844	413.124	-0.375091	0.00881315	0.117115	NS	D1081.2	unc-120
WBGene00008381	12.3523	0.0403226	0.818491	NA	NS	D1081.3	D1081.3
WBGene00045508	0.19145	0.00516385	0.847377	NA	NS	D1081.10	D1081.10
WBGene00050879	0.0600855	0	1	NA	NS	D1081.11	D1081.11
WBGene00086554	2.3703	-0.000676499	0.994432	NA	NS	D1081.12	D1081.12
WBGene00008382	30.8224	-0.264115	0.190255	0.625678	NS	D1081.4	D1081.4
WBGene00008383	3.87887	-0.00785852	0.947765	NA	NS	D1081.5	D1081.5
WBGene00008384	44.1521	0.0684264	0.73541	0.943648	NS	D1081.6	D1081.6
WBGene00008387	33.7103	0.175227	0.388018	0.795741	NS	D1081.9	D1081.9
WBGene00008385	176.627	-0.158252	0.326981	0.748335	NS	D1081.7	D1081.7
WBGene00008386	1839.65	-0.056299	0.521746	0.865753	NS	D1081.8	D1081.8
WBGene00000431	656.41	0.136132	0.198603	0.635077	NS	K02B12.1	ceh-6
WBGene00010496	744.462	-0.0922239	0.410548	0.806388	NS	K02B12.3	sec-12
WBGene00010495	11.6475	0.0111037	0.93642	NA	NS	K02B12.2	K02B12.2
WBGene00010497	306.294	-0.0733046	0.649582	0.913239	NS	K02B12.4	axl-1
WBGene00010498	797.082	-0.0417271	0.681049	0.925447	NS	K02B12.5	K02B12.5
WBGene00010499	11.4376	-0.131928	0.45544	NA	NS	K02B12.6	K02B12.6
WBGene00044679	72.4902	0.0482194	0.812262	0.963071	NS	K02B12.9	K02B12.9
WBGene00010500	1046.56	0.04196	0.646539	0.911731	NS	K02B12.7	K02B12.7
WBGene00006976	52.2531	0.0738726	0.714048	0.937605	NS	K02B12.8	zhp-3
WBGene00001677	124.938	0.0331242	0.848962	0.971314	NS	M04C7.1	gpa-15
WBGene00010855	39.4655	0.223924	0.262898	0.69221	NS	M04C7.4	M04C7.4
WBGene00010854	17.1674	-0.0701815	0.702954	NA	NS	M04C7.3	M04C7.3
WBGene00001651	5773.29	-0.0453353	0.575444	0.889618	NS	T01H8.5	gon-2
WBGene00011353	222.179	0.00589814	0.973931	0.994949	NS	T01H8.2	T01H8.2
WBGene00011352	5037.11	0.263716	0.0231663	0.216769	NS	T01H8.1	rskn-1
WBGene00000904	859.993	0.0696759	0.528177	0.867662	NS	R05D11.1	daf-8
WBGene00004305	875.163	-0.0897359	0.373942	0.784768	NS	R05D11.3	ran-4
WBGene00011033	303.549	-0.137224	0.362986	0.775195	NS	R05D11.5	R05D11.5
WBGene00011037	647.16	-0.0301547	0.809724	0.962008	NS	R05D11.9	R05D11.9
WBGene00011034	424.807	0.0590759	0.617749	0.903077	NS	R05D11.6	paxt-1
WBGene00011032	978.318	0.0725922	0.480447	0.847414	NS	R05D11.4	R05D11.4
WBGene00011035	52.8752	-0.148851	0.453534	0.833927	NS	R05D11.7	snrp-27
WBGene00011036	1171.71	0.0161605	0.878471	0.975593	NS	R05D11.8	edc-3
WBGene00009673	173.232	-0.0331478	0.83121	0.967393	NS	F43G9.13	F43G9.13
WBGene00009664	10893.6	-0.253717	0.00680703	0.0979863	NS	F43G9.1	idha-1
WBGene00009665	270.347	-0.0937964	0.510058	0.860708	NS	F43G9.2	lmd-1
WBGene00009667	478.846	-0.217819	0.188064	0.623704	NS	F43G9.4	F43G9.4
WBGene00009666	1337.55	-0.676155	5.35357e-05	0.00251599	down0.5	F43G9.3	F43G9.3
WBGene00009668	287.515	-0.253037	0.0743956	0.415847	NS	F43G9.5	cfim-1
WBGene00219282	1.54394	0.0339977	0.682679	NA	NS	F43G9.21	F43G9.21
WBGene00009670	1.64362	-0.0502692	0.550678	NA	NS	F43G9.8	F43G9.8
WBGene00001414	30.099	0.118889	0.546752	0.877501	NS	F43G9.6	fer-1
WBGene00000468	24.118	-0.112482	0.566853	NA	NS	F43G9.11	ces-1
WBGene00000777	558.347	-0.155964	0.195293	0.632895	NS	F43G9.9	cpn-1
WBGene00009671	381.547	0.165981	0.186337	0.62151	NS	F43G9.10	mfap-1
WBGene00009672	532.781	-0.090822	0.409869	0.805876	NS	F43G9.12	F43G9.12
WBGene00012150	169.707	-0.176591	0.259837	0.689956	NS	VF39H2L.1	syx-17
WBGene00000890	396.3	-0.0318824	0.798775	0.960241	NS	F39H2.2	sig-7
WBGene00009562	1078.28	0.133023	0.239936	0.67577	NS	F39H2.1	flp-22
WBGene00045237	121.549	-0.296863	0.0908213	0.457682	NS	F39H2.5	mrt-1
WBGene00006377	31.8044	-0.311804	0.123577	0.522913	NS	F39H2.4	syp-3
WBGene00009563	314.516	-0.129733	0.326561	0.748327	NS	F39H2.3	F39H2.3
WBGene00010620	615.316	0.0559475	0.637058	0.909638	NS	K07A12.1	K07A12.1
WBGene00086557	202.596	0.225366	0.156138	0.581388	NS	K07A12.8	K07A12.8
WBGene00010621	170.265	-0.14711	0.357328	0.772771	NS	K07A12.2	egg-6
WBGene00001990	254.776	0.0205432	0.886134	0.976226	NS	K07A12.6	hot-5
WBGene00010622	844.498	-0.0233326	0.820353	0.963757	NS	K07A12.4	K07A12.4
WBGene00010624	757.108	-0.199534	0.0963411	0.470815	NS	K07A12.7	mrps-15
WBGene00000209	889.191	-0.240838	0.040335	0.299609	NS	K07A12.3	asg-1
WBGene00010623	78.8722	-0.222511	0.255629	0.687116	NS	K07A12.5	K07A12.5
WBGene00003953	618.239	-0.280097	0.00998196	0.126777	NS	F39H11.5	pbs-7
WBGene00009565	409.973	-0.0900342	0.526691	0.866667	NS	F39H11.1	F39H11.1
WBGene00006577	1000.99	-0.0475793	0.629009	0.90664	NS	F39H11.2	tlf-1
WBGene00000409	598.146	-0.0575598	0.601955	0.897343	NS	F39H11.3	cdk-8
WBGene00000527	3292.67	0.144372	0.121979	0.520188	NS	C36B1.1	cle-1
WBGene00003925	563.403	-0.134485	0.239377	0.675384	NS	C36B1.4	pas-4
WBGene00007971	406.009	-0.0401633	0.744221	0.945924	NS	C36B1.3	rpb-3
WBGene00044614	98.8054	-0.0373492	0.84467	0.969775	NS	C36B1.14	C36B1.14
WBGene00044120	133.841	-0.056644	0.760049	0.94967	NS	C36B1.13	C36B1.13
WBGene00007973	120.305	-0.222675	0.213435	0.649775	NS	C36B1.6	C36B1.6
WBGene00007972	262.105	0.0252888	0.869575	0.974432	NS	C36B1.5	prp-4
WBGene00007974	193.823	-0.0983868	0.532296	0.87018	NS	C36B1.7	dhfr-1
WBGene00007975	1940.07	0.0087497	0.909515	0.981325	NS	C36B1.8	gls-1
WBGene00007976	1311.27	-0.0337394	0.706291	0.936036	NS	C36B1.9	C36B1.9
WBGene00007977	135.532	0.29978	0.0694435	0.401445	NS	C36B1.10	gska-3
WBGene00007979	1365.27	-0.0187068	0.857727	0.97282	NS	C36B1.12	imp-1
WBGene00007978	92.8413	-0.211095	0.255326	0.687116	NS	C36B1.11	C36B1.11
WBGene00008440	47.1436	0.328147	0.1033	0.486211	NS	DY3.8	DY3.8
WBGene00006574	724.383	-0.262065	0.0259003	0.232585	NS	DY3.1	tin-13
WBGene00003052	13910.7	0.14416	0.06229	0.381028	NS	DY3.2	lmn-1
WBGene00001960	48.3155	-0.244111	0.224277	0.659108	NS	DY3.3	hlh-16
WBGene00006618	65.4355	-0.0196007	0.919163	0.98417	NS	DY3.4	trt-1
WBGene00004115	16.8233	-0.0962874	0.618855	NA	NS	DY3.5	pqn-26
WBGene00008439	1412.89	-0.0232246	0.83494	0.967426	NS	DY3.6	mfb-1
WBGene00006324	1869.39	0.106764	0.173512	0.608986	NS	DY3.7	sup-17
WBGene00009453	1368.43	-0.0155588	0.913266	0.982182	NS	F36A2.3	F36A2.3
WBGene00009452	794.046	0.090651	0.426874	0.817504	NS	F36A2.2	F36A2.2
WBGene00009451	1265.07	0.0334941	0.740442	0.945513	NS	F36A2.1	cids-2
WBGene00009455	657.89	0.0998243	0.339671	0.760453	NS	F36A2.8	phip-1
WBGene00006682	453.408	0.173739	0.136127	0.545479	NS	F36A2.4	twk-30
WBGene00009454	11147.1	-0.266571	0.000431614	0.0130402	down	F36A2.7	F36A2.7
WBGene00004484	25739.6	-0.115696	0.163967	0.594803	NS	F36A2.6	rps-15
WBGene00009456	1534.83	-0.0233562	0.818529	0.963687	NS	F36A2.9	F36A2.9
WBGene00009457	153.626	-0.141449	0.367817	0.779437	NS	F36A2.10	F36A2.10
WBGene00009458	0.830903	0.0205807	0.674089	NA	NS	F36A2.11	F36A2.11
WBGene00023490	50.1885	0.247499	0.214191	0.649775	NS	F36A2.14	F36A2.14
WBGene00009459	23.5616	0.317627	0.106743	NA	NS	F36A2.12	F36A2.12
WBGene00009460	7289.8	-0.0928286	0.220681	0.656045	NS	F36A2.13	F36A2.13
WBGene00009250	4.99057	-0.0449664	0.730777	NA	NS	F29D10.1	F29D10.1
WBGene00009251	0.264375	0	1	NA	NS	F29D10.2	F29D10.2
WBGene00009252	2.61527	-0.0959879	0.350547	NA	NS	F29D10.3	F29D10.3
WBGene00002035	2815.36	0.0836128	0.420938	0.812843	NS	F29D10.4	hum-1
WBGene00010137	464.953	0.210889	0.155013	0.580782	NS	F55H12.6	ztf-26
WBGene00219283	149.674	0.0518793	0.769804	0.952532	NS	F55H12.7	F55H12.7
WBGene00010133	367.464	-0.0547267	0.736042	0.943648	NS	F55H12.2	F55H12.2
WBGene00010136	33.6457	0.0821682	0.684823	0.927013	NS	F55H12.5	F55H12.5
WBGene00004901	1.68511	-0.0299702	0.69815	NA	NS	F55H12.1	snf-2
WBGene00010134	1527.65	-0.415841	0.00183231	0.0384357	down	F55H12.3	F55H12.3
WBGene00010135	2925.14	0.380745	0.00337971	0.059511	NS	F55H12.4	F55H12.4
WBGene00006765	590.315	-0.0260233	0.829752	0.967223	NS	T08G11.5	unc-29
WBGene00011631	1087.68	0.111494	0.255033	0.687008	NS	T08G11.4	T08G11.4
WBGene00011629	19383.1	-0.135279	0.106044	0.491762	NS	T08G11.1	T08G11.1
WBGene00044684	4.77369	-0.0499795	0.707536	NA	NS	T08G11.2	T08G11.2
WBGene00011630	291.615	0.293368	0.0784614	0.427073	NS	T08G11.3	T08G11.3
WBGene00006641	962.269	-0.0833398	0.425184	0.816006	NS	F53B6.1	tsp-15
WBGene00009958	3083.45	0.146956	0.0629975	0.383258	NS	F53B6.2	madd-4
WBGene00009964	10.8039	0.0437671	0.796172	NA	NS	F53B6.9	fip-6
WBGene00009963	51.5311	-0.44887	0.0252731	0.229309	NS	F53B6.8	fipr-26
WBGene00009959	4.55094	0.0576496	0.646784	NA	NS	F53B6.4	F53B6.4
WBGene00009962	39.5896	-0.018937	0.925517	0.986071	NS	F53B6.7	F53B6.7
WBGene00219450	21.2168	-0.0620976	0.741067	NA	NS	F53B6.13	F53B6.13
WBGene00009960	10.0747	-0.0489272	0.762476	NA	NS	F53B6.5	F53B6.5
WBGene00009961	1.24579	0.0271888	0.679461	NA	NS	F53B6.6	cutl-7
WBGene00043049	5.15462	-0.0250221	0.845985	NA	NS	F32H2.11	F32H2.11
WBGene00001568	962.394	-0.035584	0.712453	0.937153	NS	F32H2.1	snpc-4
WBGene00007026	103.853	-0.0656522	0.720773	0.938916	NS	F32H2.2	mdt-31
WBGene00004953	777.546	-0.435483	1.39171e-05	0.000802198	down	F32H2.3	spd-2
WBGene00009346	91.6116	-0.027447	0.888166	0.976226	NS	F32H2.10	F32H2.10
WBGene00009341	273.797	-0.211767	0.110881	0.502332	NS	F32H2.4	thoc-3
WBGene00050880	10.9073	-0.0284409	0.867751	NA	NS	F32H2.12	F32H2.12
WBGene00009342	28912	-0.0550875	0.622164	0.904723	NS	F32H2.5	fasn-1
WBGene00009345	1.51813	0.0283488	0.729642	NA	NS	F32H2.8	F32H2.8
WBGene00006532	82.0608	0.0664819	0.739076	0.944896	NS	F32H2.9	tba-6
WBGene00009344	15.5394	0.00748085	0.965632	NA	NS	F32H2.7	F32H2.7
WBGene00009343	11.9489	-0.0688506	0.683659	NA	NS	F32H2.6	F32H2.6
WBGene00009480	73.2904	0.0612982	0.759193	0.949444	NS	F36F2.7	F36F2.7
WBGene00009478	472.128	-0.0829621	0.523091	0.866444	NS	F36F2.4	syx-7
WBGene00009479	843.942	0.0278212	0.79106	0.958452	NS	F36F2.6	fcp-1
WBGene00009477	2072.98	-0.0307431	0.715038	0.93781	NS	F36F2.3	rbpl-1
WBGene00009481	9.6562	-0.0754967	0.631967	NA	NS	F36F2.8	F36F2.8
WBGene00009476	731.242	-0.0895166	0.42629	0.817081	NS	F36F2.2	F36F2.2
WBGene00009475	208.822	-0.202162	0.204088	0.641964	NS	F36F2.1	F36F2.1
WBGene00006525	102.215	0.106064	0.577669	0.890265	NS	F36F2.5	tax-2
WBGene00007854	52.0347	-0.0871078	0.666328	0.920561	NS	C31H5.1	C31H5.1
WBGene00000058	527.752	0.183586	0.128195	0.532391	NS	C31H5.3	acr-19
WBGene00007858	53.1529	-0.128958	0.525386	0.866606	NS	C31H5.7	C31H5.7
WBGene00007855	570.578	-0.0205983	0.85973	0.973185	NS	C31H5.4	C31H5.4
WBGene00007857	2606.48	0.365902	0.00207003	0.0421125	up	C31H5.6	C31H5.6
WBGene00007856	410.938	0.186852	0.157401	0.583492	NS	C31H5.5	C31H5.5
WBGene00001843	3823.09	0.00333424	0.977659	0.995595	NS	W06D4.1	hgo-1
WBGene00012296	11.9946	0.162572	0.332676	NA	NS	W06D4.2	spe-46
WBGene00012297	12.5864	-0.164153	0.360894	NA	NS	W06D4.3	W06D4.3
WBGene00012298	387.278	-0.114249	0.351952	0.768422	NS	W06D4.4	prmt-7
WBGene00006503	344.265	-0.0798871	0.556816	0.882324	NS	W06D4.5	snx-3
WBGene00004298	118.398	0.0192603	0.913142	0.982182	NS	W06D4.6	rad-54
WBGene00011531	3611.33	0.0578172	0.546095	0.877186	NS	T06D10.1	rsbp-1
WBGene00011532	146.324	-0.202522	0.278999	0.706694	NS	T06D10.2	chaf-1
WBGene00077558	44.0401	0.0847099	0.673231	0.922364	NS	T06D10.3	T06D10.3
WBGene00003182	3896.36	0.146606	0.113984	0.506464	NS	W10D5.1	mef-2
WBGene00001574	4749.42	-0.00732825	0.92054	0.98462	NS	W10D5.3	gei-17
WBGene00012376	3843.98	-0.302987	1.15014e-05	0.000686419	down	W10D5.2	nduf-7
WBGene00014115	2739.56	0.133424	0.127981	0.531957	NS	ZK858.1	gld-4
WBGene00014116	34.0881	0.0932275	0.642159	0.911186	NS	ZK858.2	ZK858.2
WBGene00014121	1.80256	0.0519711	0.55157	NA	NS	ZK858.8	ZK858.8
WBGene00014117	51.2321	0.00926457	0.937421	0.988302	NS	ZK858.3	clec-91
WBGene00003209	966.812	0.306369	0.00179526	0.0379537	up	ZK858.4	mel-26
WBGene00014118	320.973	0.0289062	0.825133	0.965291	NS	ZK858.5	ZK858.5
WBGene00014119	2176.97	-0.0968145	0.239068	0.675384	NS	ZK858.6	ZK858.6
WBGene00014120	485.01	-0.00149533	0.991067	0.998878	NS	ZK858.7	ZK858.7
WBGene00010421	300.405	-0.220302	0.143018	0.560111	NS	H32K16.1	H32K16.1
WBGene00010422	86.5909	0.161729	0.416189	0.810423	NS	H32K16.2	H32K16.2
WBGene00009129	18.264	0.234147	0.221272	NA	NS	F25H5.7	F25H5.7
WBGene00077773	10.9643	0.111115	0.498116	NA	NS	F25H5.10	F25H5.10
WBGene00009128	224.898	-0.246816	0.120804	0.519314	NS	F25H5.6	mrpl-54
WBGene00009127	528.38	-0.0752721	0.543066	0.875087	NS	F25H5.5	F25H5.5
WBGene00001167	160525	-0.101795	0.218078	0.653072	NS	F25H5.4	eef-2
WBGene00009126	11346.4	-0.0236148	0.71897	0.938461	NS	F25H5.3	pyk-1
WBGene00009130	10.4889	0.111099	0.471438	NA	NS	F25H5.8	F25H5.8
WBGene00009125	26.4922	-0.0255219	0.898665	0.978542	NS	F25H5.2	F25H5.2
WBGene00006407	8823.42	0.153545	0.0862195	0.445422	NS	F25H5.1	lim-9
WBGene00008109	67.0964	0.136382	0.492583	0.852981	NS	WBGene00008109	C45G3.4
WBGene00008107	299.019	-0.410267	0.0185251	0.189436	NS	C45G3.1	aspm-1
WBGene00001590	116.499	-0.217732	0.222403	0.657754	NS	C45G3.3	C45G3.3
WBGene00044008	285.927	-0.190569	0.193936	0.630008	NS	C45G3.5	gip-2
WBGene00000147	192.007	0.140701	0.35531	0.771491	NS	VF36H2L.1	aph-1
WBGene00009498	3675.31	0.080696	0.239747	0.67562	NS	F36H2.1	tat-5
WBGene00009499	443.329	0.054776	0.630873	0.906657	NS	F36H2.2	ent-7
WBGene00044247	0.597452	0.0106596	0.808425	NA	NS	F36H2.4	F36H2.4
WBGene00194653	0.665536	-0.0171272	0.711963	NA	NS	F36H2.6	F36H2.6
WBGene00044404	491.666	-0.037814	0.759866	0.94967	NS	F36H2.5	F36H2.5
WBGene00009500	1892.63	-0.0332143	0.726302	0.941414	NS	F36H2.3	F36H2.3
WBGene00008779	59.84	-0.00212334	0.99146	0.998878	NS	F14B4.1	F14B4.1
WBGene00008780	1923.75	0.110794	0.429392	0.819063	NS	F14B4.2	F14B4.2
WBGene00008781	2517.32	0.202083	0.0307662	0.256992	NS	F14B4.3	rpoa-2
WBGene00009173	224.109	0.0434401	0.776402	0.95386	NS	F26H9.1	prom-1
WBGene00009174	1219.8	0.116132	0.254829	0.686741	NS	F26H9.2	F26H9.2
WBGene00009176	215.475	-0.124482	0.453334	0.833842	NS	F26H9.4	nmat-2
WBGene00004268	2581.63	-0.0348073	0.654204	0.914491	NS	F26H9.6	rab-5
WBGene00006732	933.476	-0.00802851	0.962423	0.993315	NS	F26H9.7	uev-3
WBGene00009177	1162.58	-0.028679	0.886728	0.976226	NS	F26H9.5	F26H9.5
WBGene00009178	73.7866	0.184733	0.358115	0.772941	NS	F26H9.8	uggt-2
WBGene00002026	39.9609	0.0134623	0.918326	0.98417	NS	C12C8.1	hsp-70
WBGene00007533	368.282	-0.395222	0.0043093	0.0717579	NS	C12C8.2	cbl-1
WBGene00003026	11630.1	-0.104617	0.10441	0.48856	NS	C12C8.3	lin-41
WBGene00010857	67.2936	0.0975674	0.617592	0.903077	NS	M04C9.2	M04C9.2
WBGene00010856	357.172	0.0417329	0.775739	0.953797	NS	M04C9.1	M04C9.1
WBGene00010858	131.092	-0.328582	0.0698937	0.402736	NS	M04C9.3	M04C9.3
WBGene00010859	31.27	0.361735	0.0729877	0.411584	NS	M04C9.4	M04C9.4
WBGene00001121	262.759	0.220445	0.179372	0.612299	NS	M04C9.5	dyf-5
WBGene00008878	10701.8	0.110507	0.158425	0.585311	NS	F16A11.3	ppfr-1
WBGene00008877	146.925	-0.0212203	0.903114	0.979825	NS	F16A11.2	F16A11.2
WBGene00008876	1963.18	-0.0193485	0.842687	0.968915	NS	F16A11.1	F16A11.1
WBGene00007641	1.6125	0.0129981	0.875493	NA	NS	C17E4.1	C17E4.1
WBGene00219310	0.675002	-0.0168624	0.719849	NA	NS	C17E4.19	C17E4.19
WBGene00007642	13.0878	-0.0465534	0.733191	NA	NS	C17E4.2	C17E4.2
WBGene00219313	256.563	-0.116197	0.418147	0.811389	NS	C17E4.20	C17E4.20
WBGene00007643	33.0686	-0.0947117	0.637111	0.909638	NS	C17E4.3	2003-03-01
WBGene00007644	6.21898	0.0750352	0.58896	NA	NS	C17E4.4	C17E4.4
WBGene00044236	81.9369	0.21449	0.273507	0.702128	NS	C17E4.11	C17E4.11
WBGene00003904	497.479	0.0438505	0.712525	0.937156	NS	C17E4.5	pabp-2
WBGene00007645	2296.22	0.189446	0.04751	0.326014	NS	C17E4.6	C17E4.6
WBGene00007646	14474.4	0.0327267	0.639386	0.910502	NS	C17E4.9	nkb-1
WBGene00007647	2505.92	0.135074	0.117865	0.514822	NS	C17E4.10	C17E4.10
WBGene00003172	3697.17	0.0237223	0.749107	0.947945	NS	F46A9.6	mec-8
WBGene00009754	9.12414	0.100451	0.534905	NA	NS	F46A9.1	F46A9.1
WBGene00009755	0.4899	0.0316071	0.484134	NA	NS	F46A9.2	F46A9.2
WBGene00006681	538.249	0.35052	0.00266284	0.0505154	NS	F46A9.3	twk-29
WBGene00004808	161.123	0.376744	0.042564	0.30713	NS	F46A9.4	skr-2
WBGene00004807	5358.76	-0.000981672	0.989459	0.998864	NS	F46A9.5	skr-1
WBGene00009260	276.1	-0.000373038	0.997945	0.999205	NS	F30A10.1	calm-1
WBGene00045473	0.393144	0	1	NA	NS	F30A10.14	F30A10.14
WBGene00009268	0.183238	0.00516385	0.847377	NA	NS	F30A10.11	F30A10.11
WBGene00044680	0	NA	NA	NA	NS	F30A10.13	F30A10.13
WBGene00009261	3.12689	-0.111338	0.34215	NA	NS	F30A10.2	F30A10.2
WBGene00009269	0.434887	-0.0120938	0.722536	NA	NS	F30A10.12	F30A10.12
WBGene00195244	1.68034	0.0322261	0.688295	NA	NS	F30A10.15	F30A10.15
WBGene00009263	22.0154	-0.0250157	0.899983	NA	NS	F30A10.4	F30A10.4
WBGene00006061	400.417	-0.258698	0.0622562	0.381028	NS	F30A10.5	stl-1
WBGene00009264	1224.31	-0.0209836	0.843397	0.969272	NS	F30A10.6	sac-1
WBGene00009262	984.736	0.117072	0.273348	0.702128	NS	F30A10.3	F30A10.3
WBGene00006062	2107.39	0.0188376	0.8044	0.960919	NS	F30A10.8	stn-1
WBGene00009266	2092.04	-0.0458072	0.580643	0.891404	NS	F30A10.9	F30A10.9
WBGene00009267	1292.11	-0.0163333	0.861084	0.973185	NS	F30A10.10	usp-48
WBGene00004887	219.921	0.134915	0.358927	0.773364	NS	C41G7.1	smn-1
WBGene00002226	392.094	-0.173171	0.211839	0.649144	NS	C41G7.2	klp-16
WBGene00077771	2236.91	-0.377534	0.000999721	0.0246964	down	C41G7.9	C41G7.9
WBGene00008061	36.8663	-0.0160608	0.936839	0.988302	NS	C41G7.3	C41G7.3
WBGene00008062	64.137	-0.133569	0.494732	0.853524	NS	C41G7.4	set-32
WBGene00000096	218.875	0.443427	0.00285079	0.0528915	NS	C41G7.5	ahr-1
WBGene00008063	7.72296	0.283501	0.0665474	NA	NS	C41G7.6	C41G7.6
WBGene00077525	242.797	0.152807	0.34512	0.764489	NS	C41G7.8	C41G7.8
WBGene00008064	34.3519	0.0362291	0.858193	0.97296	NS	C41G7.7	C41G7.7
WBGene00219284	3.76743	0.059501	0.618546	NA	NS	C41G7.15	C41G7.15
WBGene00007984	2214.73	0.0549954	0.589595	0.894036	NS	C36F7.1	irx-1
WBGene00007985	410.365	0.155105	0.253334	0.685395	NS	C36F7.2	swah-1
WBGene00004372	421.784	0.140399	0.391794	0.796696	NS	C36F7.4	rig-5
WBGene00007986	0.941821	0.00920806	0.877048	NA	NS	C36F7.5	C36F7.5
WBGene00009646	445.604	-0.0212277	0.908524	0.980988	NS	F42H11.1	F42H11.1
WBGene00002276	274.767	-0.115036	0.436789	0.82398	NS	F42H11.2	lem-3
WBGene00044987	49.1118	-0.00830199	0.966893	0.994813	NS	K07A1.17	K07A1.17
WBGene00010608	55.7955	-0.0869294	0.661069	0.917146	NS	K07A1.1	K07A1.1
WBGene00010617	7.07264	-0.0267714	0.85633	NA	NS	K07A1.13	K07A1.13
WBGene00010609	252.629	-0.450341	0.0120317	0.145685	NS	K07A1.2	dut-1
WBGene00010610	95.0894	-0.137636	0.443896	0.828458	NS	K07A1.3	K07A1.3
WBGene00010611	1.98828	0.108588	0.200086	NA	NS	K07A1.4	K07A1.4
WBGene00010612	2.53544	0.141936	0.1556	NA	NS	K07A1.5	K07A1.5
WBGene00010613	1.57884	0.0103031	0.900402	NA	NS	K07A1.6	K07A1.6
WBGene00010614	71.3358	-0.162329	0.4129	0.807481	NS	K07A1.7	cri-1
WBGene00219285	28.8216	-0.0822468	0.683199	0.927013	NS	K07A1.20	K07A1.20
WBGene00000177	266.691	-0.182248	0.188903	0.624249	NS	K07A1.16	aqp-9
WBGene00010619	215.908	-0.168429	0.279969	0.707379	NS	K07A1.15	K07A1.15
WBGene00002070	1436.17	-0.172933	0.151388	0.575029	NS	K07A1.8	ile-1
WBGene00010615	819.871	-0.280276	0.0170079	0.178385	NS	K07A1.9	K07A1.9
WBGene00010616	308.784	-0.47153	0.0018247	0.0383357	down	K07A1.10	K07A1.10
WBGene00004312	392.252	-0.258724	0.0542722	0.352032	NS	K07A1.11	rba-1
WBGene00003036	761.14	-0.281736	0.0429203	0.308587	NS	K07A1.12	lin-53
WBGene00011488	1314.67	-0.22981	0.0120701	0.145853	NS	T05F1.1	nra-2
WBGene00011489	100.661	0.0898477	0.62096	0.904189	NS	T05F1.2	T05F1.2
WBGene00004488	27593.3	-0.146995	0.0742388	0.415442	NS	T05F1.3	rps-19
WBGene00002027	2303.52	-0.133679	0.164586	0.595277	NS	T05F1.6	hsr-9
WBGene00011490	177.195	-0.179836	0.279891	0.707379	NS	T05F1.4	T05F1.4
WBGene00011491	0.950885	0.0153577	0.800362	NA	NS	T05F1.5	T05F1.5
WBGene00011492	23.4416	-0.0643342	0.735454	NA	NS	T05F1.7	T05F1.7
WBGene00011493	31.4829	0.225819	0.250228	0.684807	NS	T05F1.8	T05F1.8
WBGene00194656	1.02215	-0.0770756	0.212416	NA	NS	T05F1.15	T05F1.15
WBGene00011494	85.7098	0.367637	0.0646836	0.386897	NS	T05F1.9	T05F1.9
WBGene00000968	176.81	-0.153369	0.393533	0.797924	NS	T05F1.10	dhs-4
WBGene00011497	176.558	-0.0316363	0.840349	0.968309	NS	T05F1.13	T05F1.13
WBGene00011495	1433.49	0.0304755	0.808301	0.962008	NS	T05F1.11	T05F1.11
WBGene00007278	9.70528	-0.140819	0.383455	NA	NS	C03D6.6	lab-1
WBGene00007277	23.5564	0.0849947	0.669376	NA	NS	C03D6.5	asfl-1
WBGene00219796	1.74226	-0.00964837	0.909681	NA	NS	C03D6.9	C03D6.9
WBGene00003800	2545.07	-0.114678	0.126403	0.52834	NS	C03D6.4	npp-14
WBGene00000466	1066.75	0.107842	0.250938	0.685061	NS	C03D6.3	cel-1
WBGene00007275	2997.46	0.00376773	0.966029	0.994813	NS	C03D6.1	C03D6.1
WBGene00004437	2766.68	-0.00302253	0.973141	0.994949	NS	C03D6.8	rpl-24.2
WBGene00007297	545.99	0.194983	0.0912803	0.458801	NS	C04F12.1	C04F12.1
WBGene00002069	638.966	0.0273053	0.818736	0.963687	NS	C04F12.3	ikb-1
WBGene00004426	21755.9	-0.154229	0.0979588	0.474253	NS	C04F12.4	rpl-14
WBGene00007299	119.436	-0.185625	0.295831	0.724311	NS	C04F12.5	C04F12.5
WBGene00077685	0.796507	-0.00354693	0.946095	NA	NS	C04F12.12	C04F12.12
WBGene00007301	17.2248	-0.0892392	0.64271	NA	NS	C04F12.7	C04F12.7
WBGene00007302	619.966	-0.131607	0.258666	0.689232	NS	C04F12.8	C04F12.8
WBGene00219286	34.4521	-0.105937	0.601549	0.897343	NS	C04F12.16	C04F12.16
WBGene00007303	30.0286	-0.180338	0.373627	0.784721	NS	C04F12.9	rnh-1.3
WBGene00001405	1254.08	-0.123169	0.219463	0.654817	NS	C04F12.10	fce-1
WBGene00007621	681.196	0.0685287	0.551679	0.880004	NS	C16C2.4	C16C2.4
WBGene00007620	4801.55	0.258172	0.000925871	0.0231262	up	C16C2.3	ocrl-1
WBGene00001145	3660.26	0.313457	0.000468963	0.0139019	up	C16C2.2	eat-16
WBGene00000430	19.4913	-0.018028	0.926127	NA	NS	C16C2.1	ceh-5
WBGene00001582	2209.45	0.091011	0.231889	0.667049	NS	K02A11.1	gfi-2
WBGene00010487	19.0193	0.113412	0.559038	NA	NS	K02A11.2	K02A11.2
WBGene00010488	570.681	-0.0252007	0.842562	0.968915	NS	K02A11.3	K02A11.3
WBGene00044607	66.0823	-0.0518195	0.79735	0.959823	NS	K02A11.4	K02A11.4
WBGene00006352	3432.42	0.0730978	0.319542	0.742717	NS	F26E4.1	sur-6
WBGene00009157	208.278	0.025035	0.879859	0.975857	NS	F26E4.2	F26E4.2
WBGene00009158	3512.33	0.0573447	0.607307	0.900614	NS	F26E4.3	F26E4.3
WBGene00009160	9.38796	0.131967	0.433056	NA	NS	F26E4.5	F26E4.5
WBGene00009159	343.831	0.0055341	0.970253	0.994813	NS	F26E4.4	F26E4.4
WBGene00009161	6482.68	-0.306144	0.000145805	0.00553978	down	F26E4.6	F26E4.6
WBGene00009162	445.555	-0.00276181	0.984883	0.997634	NS	F26E4.7	F26E4.7
WBGene00009165	371.973	-0.0707348	0.578537	0.890593	NS	F26E4.12	gpx-1
WBGene00009163	318.868	-0.0938345	0.485914	0.84905	NS	F26E4.10	drsh-1
WBGene00006528	5181.42	-0.0787902	0.464632	0.840187	NS	F26E4.8	tba-1
WBGene00000371	7340.61	-0.274536	0.00035079	0.0111328	down	F26E4.9	cco-1
WBGene00009164	3226.7	-0.0566795	0.543261	0.875091	NS	F26E4.11	hrdl-1
WBGene00003569	2273.92	0.133774	0.234417	0.670019	NS	F35C12.2	ncx-4
WBGene00009408	350.379	0.11519	0.443624	0.828179	NS	F35C12.3	F35C12.3
WBGene00013449	11.4538	0.0312857	0.850788	NA	NS	Y67A6A.1	Y67A6A.1
WBGene00003652	285.588	0.439504	0.00159357	0.0343917	up	Y67A6A.2	nhr-62
WBGene00006978	1527.75	0.0239564	0.770089	0.952532	NS	K10C3.3	zig-1
WBGene00010730	2131.33	0.0138778	0.894322	0.977619	NS	K10C3.2	ensa-1
WBGene00010731	6025.34	0.173228	0.0102127	0.128978	NS	K10C3.4	K10C3.4
WBGene00010732	2116.81	0.164471	0.0532126	0.348075	NS	K10C3.5	K10C3.5
WBGene00003639	4824.27	0.121501	0.0959049	0.470216	NS	K10C3.6	nhr-49
WBGene00002142	308.717	-0.0817018	0.575085	0.889432	NS	T23H4.1	inx-20
WBGene00003659	873.135	0.0833462	0.506879	0.858886	NS	T23H4.2	nhr-69
WBGene00003524	82.4064	0.190237	0.29899	0.72568	NS	T23H4.3	nas-5
WBGene00003842	139.438	0.390634	0.031856	0.262476	NS	F52F12.1	2001-10-01
WBGene00000640	20.1663	-0.218026	0.244871	NA	NS	F52F12.2	col-64
WBGene00003396	827.835	0.0510918	0.657615	0.915462	NS	F52F12.3	mom-4
WBGene00009937	88.5192	-0.0505147	0.785687	0.956568	NS	F52F12.4	lsl-1
WBGene00009939	774.282	0.0659262	0.587328	0.893012	NS	F52F12.6	ztf-11
WBGene00009938	1.34108	-0.0405559	0.557245	NA	NS	F52F12.5	F52F12.5
WBGene00009941	1.79278	0.0893276	0.23776	NA	NS	F52F12.8	F52F12.8
WBGene00009942	6.22054	0.106985	0.465626	NA	NS	F52F12.9	F52F12.9
WBGene00009940	335.989	-0.211224	0.194677	0.631202	NS	F52F12.7	strl-1
WBGene00013696	22.4854	-0.0634463	0.750751	NA	NS	Y106G6A.4	Y106G6A.4
WBGene00013695	1113.68	-0.0115285	0.902222	0.979801	NS	Y106G6A.2	epg-8
WBGene00013697	484.063	-0.0261503	0.818497	0.963687	NS	Y106G6A.5	dsbn-1
WBGene00013694	440.678	0.0102543	0.937188	0.988302	NS	Y106G6A.1	Y106G6A.1
WBGene00005023	3018.91	0.0407357	0.698856	0.933099	NS	T24D1.1	sqv-5
WBGene00011985	282.938	0.0631908	0.63041	0.906657	NS	T24D1.2	T24D1.2
WBGene00011988	34.0561	0.143547	0.479532	0.847193	NS	T24D1.5	har-2
WBGene00011986	19.2076	-0.0449906	0.816464	NA	NS	T24D1.3	T24D1.3
WBGene00007043	269.929	-0.0957281	0.500382	0.856216	NS	T24D1.4	tag-179
WBGene00003397	974.918	-0.145841	0.185986	0.621505	NS	T23D8.1	mom-5
WBGene00006633	812.17	-0.0141434	0.887536	0.976226	NS	T23D8.2	tsp-7
WBGene00011944	2578.45	0.0991993	0.306827	0.733058	NS	T23D8.3	T23D8.3
WBGene00001226	3787.05	0.0413613	0.673651	0.922364	NS	T23D8.4	eif-3.C
WBGene00006379	148.312	-0.214977	0.2391	0.675384	NS	T23D8.9	sys-1
WBGene00001941	185.722	-0.0238904	0.897803	0.978542	NS	T23D8.5	his-67
WBGene00001942	229.976	-0.103586	0.583197	0.892259	NS	T23D8.6	his-68
WBGene00011945	178.209	0.0191828	0.905916	0.980134	NS	T23D8.7	hpo-24
WBGene00000476	1164.89	0.127382	0.303219	0.729326	NS	T23D8.8	cfi-1
WBGene00007274	18.0702	0.0935085	0.615964	NA	NS	C03C11.1	C03C11.1
WBGene00001483	6.8274	-0.0835599	0.563562	NA	NS	C03C11.2	fog-3
WBGene00008661	11.7887	-0.162689	0.353221	NA	NS	F10G8.1	F10G8.1
WBGene00008662	36.2974	0.10077	0.619635	0.903844	NS	F10G8.2	F10G8.2
WBGene00008663	89.9073	-0.0217567	0.912933	0.982182	NS	F10G8.4	eak-6
WBGene00003803	790.737	0.002331	0.981643	0.99663	NS	F10G8.3	rae-1
WBGene00008665	15630.5	0.0833126	0.162658	0.592633	NS	F10G8.7	ercc-1
WBGene00003564	11733.4	0.0457487	0.503062	0.857704	NS	F10G8.5	ncs-2
WBGene00008664	1095.51	0.00676001	0.947156	0.989705	NS	F10G8.6	nubp-1
WBGene00008667	136.998	0.118073	0.509595	0.860575	NS	F10G8.9	F10G8.9
WBGene00008666	1587.33	-0.147143	0.17544	0.610594	NS	F10G8.8	F10G8.8
WBGene00007156	4.1614	0.0248089	0.838134	NA	NS	B0379.2	B0379.2
WBGene00007159	35.3555	0.376549	0.0635495	0.383858	NS	B0379.7	B0379.7
WBGene00007155	2092.05	0.230312	0.0698886	0.402736	NS	B0379.1	B0379.1
WBGene00003508	2703.88	0.026773	0.750966	0.948164	NS	B0379.3	mut-16
WBGene00007054	9414.89	0.145293	0.0380843	0.288986	NS	B0379.4	scpl-1
WBGene00007158	208.172	0.233079	0.12977	0.5356	NS	B0379.6	B0379.6
WBGene00013698	30.2969	-0.270543	0.16905	0.600986	NS	Y106G6D.1	Y106G6D.1
WBGene00013699	10.6185	-0.0114682	0.931092	NA	NS	Y106G6D.2	Y106G6D.2
WBGene00013700	74.5762	0.103502	0.604512	0.899113	NS	Y106G6D.3	Y106G6D.3
WBGene00013701	231.526	0.100899	0.562721	0.884861	NS	Y106G6D.4	Y106G6D.4
WBGene00013704	75.5828	0.0866005	0.647242	0.911902	NS	Y106G6D.8	Y106G6D.8
WBGene00013702	259.668	0.049941	0.740137	0.945379	NS	Y106G6D.6	Y106G6D.6
WBGene00013703	1589.37	0.191042	0.0708142	0.406083	NS	Y106G6D.7	Y106G6D.7
WBGene00008885	337.925	-0.00474194	0.969198	0.994813	NS	F16C3.1	F16C3.1
WBGene00008886	855.615	0.0499543	0.802852	0.960558	NS	F16C3.2	F16C3.2
WBGene00023415	229.313	0.0128249	0.933736	0.987783	NS	F16C3.3	F16C3.3
WBGene00044243	52.5645	-0.141898	0.481695	0.848076	NS	F16C3.4	F16C3.4
WBGene00006447	167.701	-0.174957	0.253208	0.685395	NS	C25A1.3	tag-72
WBGene00007705	338.587	-0.145315	0.310268	0.734744	NS	C25A1.1	C25A1.1
WBGene00001442	93.888	0.252783	0.191852	0.627724	NS	C25A1.2	fkh-10
WBGene00007706	1090.31	-0.165525	0.129332	0.534608	NS	C25A1.4	C25A1.4
WBGene00007707	1631.67	0.279973	0.0114523	0.140245	NS	C25A1.5	C25A1.5
WBGene00077526	2779.53	0.132694	0.101555	0.482973	NS	C25A1.16	C25A1.16
WBGene00007708	1324.53	0.131542	0.211267	0.649144	NS	C25A1.6	nola-3
WBGene00002153	1434.07	-0.240045	0.0272248	0.239536	NS	C25A1.7	iars-2
WBGene00007709	200.829	-0.0254914	0.887201	0.976226	NS	C25A1.8	clec-87
WBGene00007710	183.591	0.153424	0.431319	0.820193	NS	C25A1.9	rsa-1
WBGene00000931	11065	0.237142	0.00288513	0.0534541	NS	C25A1.10	dao-5
WBGene00007711	279.889	-0.31345	0.0366088	0.281838	NS	C25A1.12	lid-1
WBGene00007712	641.358	-0.200844	0.118347	0.515756	NS	C25A1.13	mrpl-34
WBGene00000095	1337.62	0.0148114	0.870341	0.974432	NS	C25A1.11	aha-1
WBGene00007713	2.12613	-0.013616	0.875148	NA	NS	C25A1.15	C25A1.15
WBGene00013705	4.36432	0.116894	0.380866	NA	NS	Y106G6E.1	Y106G6E.1
WBGene00219498	1.20074	0.0882414	0.214424	NA	NS	Y106G6E.8	Y106G6E.8
WBGene00013708	200.208	-0.0888894	0.595621	0.896384	NS	Y106G6E.4	Y106G6E.4
WBGene00000426	771.841	-0.0698581	0.503581	0.857995	NS	Y106G6E.5	ced-12
WBGene00013709	4354.4	0.122295	0.0914371	0.45916	NS	Y106G6E.6	csnk-1
WBGene00003000	674.317	0.134073	0.275692	0.704002	NS	ZC247.3	lin-11
WBGene00013860	324.962	0.0684317	0.645878	0.911731	NS	ZC247.2	ZC247.2
WBGene00013859	94565.6	0.289317	0.0429828	0.308794	NS	ZC247.1	ZC247.1
WBGene00007047	755.296	-0.120109	0.248639	0.682898	NS	T20F10.1	wts-1
WBGene00011864	602.203	-0.139296	0.206985	0.646548	NS	T20F10.2	T20F10.2
WBGene00011866	518.782	0.249217	0.0623571	0.381266	NS	T20F10.5	T20F10.5
WBGene00013715	584.422	0.366413	0.00585818	0.088881	NS	Y106G6G.6	Y106G6G.6
WBGene00013713	247.284	0.122726	0.422801	0.813696	NS	Y106G6G.4	Y106G6G.4
WBGene00013712	41.0376	0.0116354	0.954228	0.991191	NS	Y106G6G.3	dlc-6
WBGene00013711	1138.45	0.245679	0.0379936	0.288939	NS	Y106G6G.2	Y106G6G.2
WBGene00013710	32.2682	-0.0488259	0.809539	0.962008	NS	Y106G6G.1	Y106G6G.1
WBGene00004476	54301.1	-0.212209	0.0158189	0.170966	NS	ZC434.2	rps-7
WBGene00013892	623.141	0.15525	0.15028	0.572917	NS	ZC434.4	ZC434.4
WBGene00220261	40.7882	0.15491	0.442416	0.827561	NS	ZC434.10	ZC434.10
WBGene00013891	168.806	-0.204437	0.253018	0.685395	NS	ZC434.3	ZC434.3
WBGene00001337	5694.21	-0.238575	0.00297023	0.0541239	NS	ZC434.5	ears-1
WBGene00000148	521.507	-0.149237	0.196644	0.634399	NS	ZC434.6	aph-2
WBGene00013893	352.761	-0.239255	0.070923	0.406163	NS	ZC434.7	ZC434.7
WBGene00013894	105.669	-0.0453163	0.80234	0.960509	NS	ZC434.8	ZC434.8
WBGene00013895	2072.75	0.0365732	0.789044	0.957978	NS	ZC434.9	ZC434.9
WBGene00009743	167.092	0.0824432	0.658042	0.915583	NS	F45H11.1	sptf-1
WBGene00003587	299.38	0.0203558	0.893354	0.977518	NS	F45H11.2	ned-8
WBGene00009744	948.361	-0.131665	0.180213	0.613661	NS	F45H11.3	hpo-35
WBGene00009745	119.571	-0.160955	0.361642	0.774258	NS	F45H11.5	F45H11.5
WBGene00077521	1156.86	-0.0585096	0.533332	0.870539	NS	F45H11.6	maf-1
WBGene00003233	3377.63	0.0656502	0.455424	0.835034	NS	F45H11.4	mgl-2
WBGene00000843	859.855	-0.0238938	0.861602	0.973185	NS	F25D7.1	cup-2
WBGene00009112	2100.73	0.0770488	0.393743	0.797924	NS	F25D7.2	tag-353
WBGene00003847	1619.52	-0.071198	0.482251	0.848164	NS	F25D7.3	blmp-1
WBGene00009113	128.604	-0.222151	0.217506	0.652083	NS	F25D7.4	F25D7.4
WBGene00009114	2.55012	0.0076148	0.940324	NA	NS	F25D7.5	F25D7.5
WBGene00013716	1134.24	-0.0629958	0.62467	0.905761	NS	Y106G6H.1	Y106G6H.1
WBGene00003902	58314.1	-0.139633	0.104186	0.488108	NS	Y106G6H.2	pab-1
WBGene00004444	13013.3	-0.220441	0.0184166	0.188756	NS	Y106G6H.3	rpl-30
WBGene00013717	172.032	0.119021	0.487557	0.849853	NS	Y106G6H.4	madf-10
WBGene00013718	2297.29	-0.233411	0.00803431	0.110017	NS	Y106G6H.5	Y106G6H.5
WBGene00013719	299.016	-0.258336	0.0600178	0.374258	NS	Y106G6H.6	Y106G6H.6
WBGene00004753	1064.38	-0.00702138	0.937685	0.988302	NS	Y106G6H.7	sec-8
WBGene00013720	246.039	0.0137762	0.924933	0.986071	NS	Y106G6H.8	Y106G6H.8
WBGene00013721	14.9119	0.066712	0.675688	NA	NS	Y106G6H.9	Y106G6H.9
WBGene00001112	631.176	-0.172321	0.117	0.512369	NS	Y106G6H.12	duo-3
WBGene00013723	43.202	0.216289	0.284732	0.713153	NS	Y106G6H.13	Y106G6H.13
WBGene00013724	122.324	-0.21137	0.231769	0.667049	NS	Y106G6H.14	Y106G6H.14
[truncated: 18,449 more rows]
