# Supplementary material for: Soma-to-Germline miRNA inheritance via Yolk Promotes Stress Resilience in Progeny
Source: Research Square preprint supplement (doi:10.21203/rs.3.rs-4711258/v1), 2025-07-09
Supplement: Supplementary file 3 [file 8c843a2e2e488af1e2a6bad3.xlsx]

## Sheet: Supplementary Table 8
Supplementary Table 8. CRISPR-Cas9 guide RNA lists used in this study.
	Allele	Description	Target	Guide RNA
	rme-2(gcp072[rme-2::AID::2xHA])IV	In frame insertion of AID::2xHA before rme-2's STOP codon	rme-2	5'-AATCGAATGACTCCAGCGAA-3'
	gcp88[mex-5p::TIR1(F79G)::F2A::mTagBFP2::AID*::NLS::tbb-2 3'UTR] (II:0.77)	F79G mutation of TIR-1 in wrdSi51. Seven silent mutations were inserted as well to prevent guideRNA targetting on the repair template	tir-1	5'-GGTTGAAGTCGGCGAAGTG-3'
	hrg-1(gcp100[hrg-1_mir85 seed mutated]) X	CRISPR in N2, mutation of miR85 target site in hrg-1 3'UTR. Wt mir85 = attttgta Mutated mir85 = tgtcttgt. The last mutation of a to t isn’t part of the seed but removes a SpeI restriction site for the genotyping	hrg-1	5'-CTAGTACAAAATTAGGCACA-3'
		ssODN used for repair template
	Allele	Sequence	Target	Description
	gcp88[mex-5p::TIR1(F79G)::F2A::mTagBFP2::AID*::NLS::tbb-2 3'UTR] (II:0.77)	TTCCCAAAGGTCCGTTCCGTCGAGCTCAAGGGAAAaCCgCAtGGAGCtGAtTTtAAtCTCGTCCCAGACGGATGGGGAGGATACGTCTACCCATG	tir-1	To generate TIR1(F79G) mutation
		Silent mutations to prevent guideRNA targetting on the repair template
		F79G mutation (TTC to GGA)
	hrg-1(gcp100[hrg-1_mir85 seed mutated]) X	ttttcaatttttcattttcaataactattggacattgtgcctatgtcttgtctagttcaaaagtaagactctgtagtacgggtg	hrg-1	Mutation of mir85 seed region with the deletion of SpeI restriction site
		Silent mutations im the PAM SITE
		Mutation of mir85 seed (WT=attttgta Mutated=tgtcttgt)
		dsDNA used for rme-2's repair template
	Allele	Sequence	Target	Description
	rme-2(gcp072[rme-2::AID::2xHA])IV	CAACTGGTTTCGTCAGATCGGCTTCCGCACCATTtGCcGGtGTtATcCGcTTcGAaAAtGAtAGtTTaTTaCCTAAAGATCCAGCCAAACCTCCGGCCAAGGCACAAGTTGTGGGATGGCCACCGGTGAGATCATACCGGAAGAACGTGATGGTTTCCTGCCAAAAATCAAGCGGTGGCCCGGAGGCGGCGGCGTTCGTGAAGTACCCATACGATGTTCCAGATTACGCTGGCTATCCCTATGACGTCCCGGACTATGCATGAattctactacaaaattactaaatcagatgt
			rme-2	AID::2xHA insertion in C-term of RME-2
		Oligos used to generate rme-2's dsDNA repair template
		Sequence	Target	Description
		5'-CAACTGGTTTCGTCAGATCGGCTTCCGCACCATTtGCcGGtGTtATcCGcTTcGAaAAtGAtAGtTTaTTaCCTAAAGATCCAGCCAAACCTCC-3'	rme-2	HOMOLOGY ARM IN RME-2'S C-TERM SEQUENCE_PAM SITE_silent mutations to prevent guide RNA targetting_NUCLEOTIDES SEQUENCE TO AMPLIFY AID
		5'-acatctgatttagtaattttgtagtagaatTCATGCATAGTCCGGGACGTCATAG-3'	rme-2	homology arm in rme-2's 3'UTR_STOP CODON_NUCLEOTIDES SEQUENCE TO AMPLIFY HA
	Oligos used to generate dsDNA template for in vitro transcription of guide RNA
	Oligos sequence	Description	Target gene
	5'-AAAAGCACCGACTCGGTGC-3'	AP905.2 reverse
	5'-gTAATACGACTCACTATAGGGGTTGAAGTCGGCGAAGTGgttttagagctagaaatagc-3'	Use in combination with AP905.2 reverse to generate a template for in vitro transcription of tir-1 guide RNA	tir-1
	5'-gTAATACGACTCACTATAGGAATCGAATGACTCCAGCGAAgttttagagctagaaatagc-3'	Use in combination with AP905.2 reverse to generate a template for in vitro transcription of rme-2 guide RNA	rme-2
	5'-GTAATACGACTCACTATAGGCTAGTACAAAATTAGGCACAgttttagagctagaaatagc-3'	Use in combination with AP905.2 reverse to generate a template for in vitro transcription of hrg-1 guide RNA	hrg-1
	In bold T7 promoter for in vitro transcription
	In red guide RNA sequence 5'-3'
	In lower case nucleotides sequence to amplify tracrRNA from AP905.2
	Oligos used for genotyping CRISPR edits
	Oligos sequence (5'-3')	Description	Target gene
	ATGCAAAAGAGAATCGCCTTGTC	Forward N-term tir-1	tir-1
	cttacCTTGAGGTTACGGCAGG	Reverse tir-1	tir-1
	GAGaTTaAAaTCaGCTCCaTGcGGt	Reverse F79G mutation specific	tir-1
	CTCAACAAGAGCATATGAAAGATGTG	Forward C-term rme-2	rme-2
	ccgaatctgaaccacgaatgtag	Reverse 3'UTR rme-2	rme-2
	ccagGAGCCACCGTATCGTTCC	Fwd last exon hrg-1	hrg-1
	Cccatccaaagcgcacacgtc	Rev hrg-1 3'UTR	hrg-1
