# Supplementary material for: Soma-to-Germline miRNA inheritance via Yolk Promotes Stress Resilience in Progeny
Source: Research Square preprint supplement (doi:10.21203/rs.3.rs-4711258/v1), 2025-07-09
Supplement: Supplementary file 4 [file 971fdb11b092e8644243e0b7.xlsx]

## Sheet: Supplementary Table 5
Supplementary Table 5. DE miRNAs in 2-cell embryos from wild-type and DP degron strain mothers exposed to osmotic stress or starvation.

## Sheet: Wild-type 300mM NaCl
2-cell embryo miRNA seq derived from wild-type adult exposed to 300mM NaCl vs 50mM NaCl
miRNA in bold correspond to DE miRNAs (log2 fold change ≤ -0.5 or ≥ 0.5 and p-value ≤ 0.05) and Yolk-enriched miRNAs are labelled in green. Results from two biological replicates.
miRNA name	log2(FC)	FDR
mir-85-3p	4.49367	1.14e-12
mir-244-5p	-0.460133	0.200667
mir-237-5p	4.15289	1.01e-33
let-7-5p	3.6278	5.08e-33
mir-786-3p	3.44863	1.24e-17
mir-240-3p	3.4114	1.33e-23
lin-4-5p	3.0716	1.65e-22
mir-233-3p	-0.532257	0.104186
mir-48-5p	3.05415	3.42e-28
mir-236-3p	-0.626005	0.0709995
mir-84-5p	3.03904	1.45e-14
mir-230-3p	3.0256	0.016127
mir-77-3p	2.72144	2.69e-14
mir-49-3p	-0.664915	0.065077
mir-238-3p	2.69849	1.16e-22
mir-239.1-5p	2.49709	7.99e-13
mir-77-5p	3.4043	0.0869072
mir-246-3p	2.46331	3.62e-17
mir-34-5p	2.44406	5.93e-11
mir-2-3p	-0.418306	0.209683
mir-241-5p	1.57188	0.00156638
mir-63-3p	1.36791	0.0008648
mir-42-3p	-0.372798	0.249617
mir-243-3p	1.27359	0.0157056
mir-58.1-3p	-0.172342	0.500303
mir-245-3p	-0.462321	0.177246
mir-232-3p	-0.857811	0.065077
mir-55-3p	-0.440192	0.18007
mir-44-3p	-0.0903836	0.738322
mir-74-3p	-0.44214	0.194722
mir-239.2-5p	0	1
mir-52-5p	-0.37836	0.194722
mir-234-3p	-0.1669	0.484108
mir-57-5p	-0.256415	0.357164
mir-241-3p	0	1
mir-58.1-5p	1.07637	0.00276663
mir-235-3p	1.05829	0.0008648
mir-45-3p	-0.161096	0.594772
mir-1-3p	-0.360014	0.271112
mir-80-3p	0.867576	0.00535043
mir-46-3p	-0.471029	0.223006
mir-250-3p	-0.143885	0.67902
mir-56-3p	-0.435895	0.194754
mir-82-3p	0.293799	0.235051
mir-252-5p	-0.700214	0.0775437
mir-253-3p	0.450661	0.186351
mir-259-5p	0	1
mir-70-3p	0.834266	0.0187397
mir-73-3p	0.0604287	0.667468
mir-242-5p	-0.450653	0.233672
mir-71-5p	0.827952	0.0110937
mir-231-3p	-0.698936	0.0365462
mir-35-3p	0.00631401	0.879367
mir-124-3p	-0.861369	0.0126273
mir-86-5p	-0.569228	0.0976934
mir-356.2-3p	0	1
mir-36-3p	-0.157951	0.426281
mir-83-3p	0.345979	0.665245
mir-37-3p	0.0332626	0.740632
mir-38-3p	-0.447625	0.177246
mir-81-3p	0.307843	0.245266
mir-40-3p	-0.165416	0.374998
mir-41-3p	-0.47076	0.165499
mir-53-5p	-0.318808	0.368142
mir-79-3p	-0.626991	0.0624356
mir-355-5p	-0.667421	0.266622
mir-228-5p	-0.358591	0.283165
mir-67-3p	-0.679066	0.0735024
mir-795-5p	2.64044	0.174913
mir-76-3p	-0.995511	0.00163974
mir-51-5p	-0.0449636	0.767741
mir-248-3p	1.70879	0.146758
mir-59-3p	0.124446	0.702253
mir-60-3p	-0.462474	0.25847
mir-64-5p	0.335274	0.216867
mir-65-5p	0.239568	0.317264
mir-66-5p	0.0618582	0.844302
mir-46-5p	-0.392784	0.253524
mir-80-5p	-0.0374808	0.811219
mir-47-3p	0.759085	0.0863379
mir-72-5p	-0.143054	0.512022
mir-75-3p	0	1
mir-47-5p	0.792645	0.211017
mir-90-3p	-0.201195	0.397044
F39B1.3-5p	0	1
let-7-3p	0	1
lin-4-3p	0	1
mir-48-3p	0	1
lsy-6-3p	0	1
lsy-6-5p	0	1
mir-1018-3p	0	1
mir-1019-3p	0	1
mir-1019-5p	0	1
mir-1020-3p	0	1
mir-1020-5p	0	1
mir-1021-5p	0	1
mir-1022-3p	0	1
mir-1-5p	0	1
mir-1817-5p	0	1
mir-1818-5p	0	1
mir-1819-3p	0	1
mir-1819-5p	0	1
mir-1820-3p	0	1
mir-1821-3p	0	1
mir-1821-5p	0	1
mir-1823-3p	0	1
mir-1823-5p	0	1
mir-1824-3p	0	1
mir-1824-5p	0	1
mir-1828-3p	0	1
mir-1829.1-3p	0	1
mir-1829.1-5p	0	1
mir-1829.2-3p	0	1
mir-1829.2-5p	-0.307216	0.23409
mir-1829.3-3p	0	1
mir-1830-3p	0	1
mir-1830-5p	0	1
mir-1832.1-3p	0	1
mir-1832.1-5p	0	1
mir-1832.2-3p	0	1
mir-1832.2-5p	0	1
mir-1833-3p	0	1
mir-2207-3p	0	1
mir-2207-5p	0	1
mir-2208.1-3p	0	1
mir-2208.1-5p	0	1
mir-2208.2-3p	0	1
mir-2208.2-5p	0	1
mir-2209.1-5p	0	1
mir-2209.2-3p	0	1
mir-2209.2-5p	0	1
mir-2209.3-3p	0	1
mir-2209.3-5p	0	1
mir-2210-3p	0	1
mir-2210-5p	0	1
mir-2211-3p	0	1
mir-2211-5p	0	1
mir-2212-3p	0	1
mir-2212-5p	0	1
mir-2213-3p	0	1
mir-2213-5p	0	1
mir-2214-5p	-0.044926	0.797727
mir-2215-3p	0	1
mir-2215-5p	0	1
mir-2216-3p	0	1
mir-2216-5p	0	1
mir-2217.1-3p	0	1
mir-2217.1-5p	0	1
mir-2217.2-3p	0	1
mir-2217.2-5p	0	1
mir-2217.3-3p	0	1
mir-2217.3-5p	0	1
mir-2217.4-3p	0	1
mir-2217.4-5p	0	1
mir-2217.5-3p	0	1
mir-2217.5-5p	0	1
mir-2218.1-3p	0	1
mir-2218.1-5p	0	1
mir-2218.2-3p	0	1
mir-2218.2-5p	0	1
mir-2219-3p	0	1
mir-2219-5p	0	1
mir-2220-3p	0	1
mir-2220-5p	0	1
mir-2221-3p	0	1
mir-228-3p	0	1
mir-229-5p	0.0227256	0.788537
mir-232-5p	0	1
mir-233-5p	0	1
mir-234-5p	0	1
mir-237-3p	0	1
mir-239.1-3p	0	1
mir-239.2-3p	0	1
mir-353-5p	1.75667	0.0187397
mir-39-5p	1.64318	1.18e-05
mir-244-3p	0	1
mir-245-5p	0	1
mir-246-5p	0	1
mir-247-3p	0	1
mir-247-5p	0	1
mir-249-3p	0	1
mir-249-5p	0	1
mir-252-3p	0	1
mir-253-5p	0	1
mir-72-3p	1.19706	0.021766
mir-254-5p	0	1
mir-255-3p	0	1
mir-255-5p	0	1
mir-256-3p	0	1
mir-257-5p	0	1
mir-258.1-5p	0	1
mir-258.2-5p	0	1
mir-259-3p	0	1
mir-261-3p	0	1
mir-262-3p	0	1
mir-264-3p	0	1
mir-265-3p	0	1
mir-266-5p	0	1
mir-267-5p	0	1
mir-268-5p	0	1
mir-269-5p	0	1
mir-270-3p	0	1
mir-271-5p	0	1
mir-272-3p	0	1
mir-273-3p	0	1
mir-2953-3p	0	1
mir-2953-5p	0	1
mir-355-3p	0	1
mir-34-3p	0	1
mir-356.1-5p	0	1
mir-356.2-5p	0	1
mir-4923.2-3p	0	1
mir-357-5p	0	1
mir-358-3p	0	1
mir-358-5p	0	1
mir-359-3p	0	1
mir-360-3p	0	1
mir-360-5p	0	1
mir-238-5p	0.597278	0.487104
mir-392-3p	0	1
mir-392-5p	0	1
mir-39-3p	-0.00594508	0.823841
mir-87-5p	-0.252661	0.614107
mir-40-5p	0	1
mir-41-5p	0.187045	0.454913
mir-8191-5p	1.32324	0.0979907
mir-4807-3p	0	1
mir-35-5p	0.829927	0.199361
mir-63-5p	1.18953	0.279366
mir-54-5p	-0.24002	0.328808
mir-230-5p	0	1
mir-4805-3p	0	1
mir-4805-5p	0	1
mir-4806-3p	0	1
mir-4806-5p	0	1
mir-43-3p	-0.600505	0.0833788
mir-4808-3p	0	1
mir-4808-5p	0	1
mir-4809-3p	0	1
mir-4809-5p	0	1
mir-4810.1-3p	0	1
mir-4810.2-3p	0	1
mir-4810.2-5p	0	1
mir-4811-3p	0	1
mir-4811-5p	0	1
mir-4812-3p	0	1
mir-44-5p	0.766281	0.0971077
mir-2-5p	-0.766187	0.0229889
mir-4813-5p	0	1
mir-4814-3p	0	1
mir-4814-5p	0	1
mir-4815-3p	0	1
mir-4916-3p	0.366338	0.434865
mir-49-5p	-0.853427	0.065077
mir-4920-5p	0	1
mir-4921-3p	0	1
mir-4922.1-3p	0	1
mir-4922.2-3p	0	1
mir-4923.1-3p	0	1
mir-787-3p	0.394682	0.378649
mir-4924-5p	0	1
mir-4925-3p	0	1
mir-4926-5p	0	1
mir-4927-5p	0	1
mir-4929-3p	0	1
mir-4930-5p	0	1
mir-4931-3p	0	1
mir-4932-5p	0	1
mir-4933-5p	0	1
mir-4934-3p	0	1
mir-4935-5p	0	1
mir-73-5p	0.498809	0.524188
mir-4937-5p	0	1
mir-4938-5p	0	1
mir-357-3p	0	1
mir-50-3p	0	1
mir-54-3p	-0.501327	0.165164
mir-37-5p	0.672595	0.195826
mir-4936-3p	0.0531811	0.796479
mir-124-5p	-1.63524	0.0187397
mir-53-3p	0	1
mir-79-5p	-0.180502	0.777752
mir-52-3p	-0.918091	0.106728
mir-240-5p	0	1
mir-235-5p	-1.06535	0.0259146
mir-5545-3p	0	1
mir-5545-5p	0	1
mir-5546-3p	0	1
mir-5546-5p	0	1
mir-5547-3p	0	1
mir-5547-5p	0	1
mir-5548-3p	0	1
mir-5548-5p	0	1
mir-5549-3p	0	1
mir-5549-5p	0	1
mir-5550-3p	0	1
mir-5550-5p	0	1
mir-5551-3p	0	1
mir-5551-5p	0	1
mir-5552-3p	0	1
mir-5552-5p	0	1
mir-5553-3p	0	1
mir-5553-5p	0	1
mir-55-5p	0	1
mir-71-3p	0.726337	0.286832
mir-5592.1-5p	0	1
mir-1829.3-5p	-0.682954	0.109487
mir-5592.2-5p	0	1
mir-5593.1-3p	0	1
mir-5593.1-5p	0	1
mir-5593.2-3p	0	1
mir-5593.2-5p	0	1
mir-5594-3p	0	1
mir-5594-5p	0	1
mir-5595-3p	0	1
mir-5595-5p	0	1
mir-50-5p	-0.152123	0.66175
mir-74-5p	1.25392	0.198633
mir-57-3p	0	1
mir-81-5p	0.416813	0.767833
mir-236-5p	0	1
mir-87-3p	-0.47885	0.163756
mir-58.2-3p	0	1
mir-58.2-5p	0	1
miR58Synth	0	1
mir-250-5p	0.334653	0.238789
mir-59-5p	0	1
mir-5592.2-3p	1.25412	0.125655
mir-61-3p	0.092582	0.699216
mir-61-5p	-0.448874	0.223006
mir-789.2-5p	0.727882	0.152658
mir-38-5p	-0.581982	0.0971077
mir-65-3p	0	1
mir-62-3p	-1.14348	0.0400795
mir-260-3p	-0.494385	0.220605
mir-5592.1-3p	1.10173	0.228933
mir-243-5p	1.29622	0.187606
mir-70-5p	0	1
mir-254-3p	1.01757	0.431512
mir-798-3p	0	1
mir-45-5p	0	1
mir-36-5p	0	1
mir-75-5p	0	1
mir-64-3p	3.8068	0.159891
mir-76-5p	0	1
mir-4813-3p	-0.461151	0.175786
mir-8196.2-3p	-1.42586	0.256047
mir-78-3p	0	1
mir-784-3p	0	1
mir-784-5p	0	1
mir-785-3p	0	1
mir-785-5p	0	1
mir-43-5p	0.897715	0.347353
mir-786-5p	0	1
mir-354-3p	0	1
mir-787-5p	0	1
mir-788-3p	0	1
mir-788-5p	0	1
mir-789.1-3p	0	1
mir-789.1-5p	0	1
mir-789.2-3p	0	1
mir-790-3p	0	1
mir-790-5p	0	1
mir-791-3p	0	1
mir-791-5p	0	1
mir-792-3p	0	1
mir-792-5p	0	1
mir-229-3p	1.18782	0.0708231
mir-1822-3p	-1.10134	0.14054
mir-794-3p	0	1
mir-794-5p	0	1
mir-795-3p	0	1
mir-793-3p	0	1
mir-51-3p	0	1
mir-796-5p	0	1
mir-797-3p	0	1
mir-797-5p	0	1
mir-4812-5p	-0.60866	0.533132
mir-799-3p	0	1
mir-800-3p	0	1
mir-800-5p	0	1
mir-1820-5p	0	1
mir-60-5p	-0.912193	0.216756
mir-67-5p	0.561598	0.472679
mir-42-5p	0	1
mir-8186.1-3p	0	1
mir-8186.1-5p	0	1
mir-8186.2-3p	0	1
mir-8186.2-5p	0	1
mir-8187-3p	0	1
mir-8187-5p	0	1
mir-8188-3p	0	1
mir-8188-5p	0	1
mir-8189-3p	0	1
mir-8189-5p	0	1
mir-8190-3p	0	1
mir-8190-5p	0	1
mir-8191-3p	0	1
mir-56-5p	-0.909787	0.285407
mir-8192-3p	0	1
mir-8192-5p	0	1
mir-8193-3p	0	1
mir-8193-5p	0	1
mir-8194-3p	0	1
mir-8194-5p	0	1
mir-8195-3p	0	1
mir-8195-5p	0	1
mir-1022-5p	0	1
mir-8196.1-5p	0	1
mir-2214-3p	0.692554	0.0377438
mir-8196.2-5p	0	1
mir-8197-3p	0	1
mir-8197-5p	0	1
mir-8198-5p	0	1
mir-8200-3p	0	1
mir-8200-5p	0	1
mir-8201-3p	0	1
mir-8201-5p	0	1
mir-8202-3p	0	1
mir-8203-3p	0	1
mir-8203-5p	0	1
mir-8204-3p	0	1
mir-8204-5p	0	1
mir-8205-3p	0	1
mir-8205-5p	0	1
mir-8206-3p	0	1
mir-8206-5p	0	1
mir-8207-3p	0	1
mir-8207-5p	0	1
mir-8208-3p	0	1
mir-8208-5p	0	1
mir-8209-3p	0	1
mir-8209-5p	0	1
mir-8210-3p	0	1
mir-8210-5p	0	1
mir-8211-3p	0	1
mir-8211-5p	0	1
mir-8212-3p	0	1
mir-8212-5p	0	1
mir-8196.1-3p	0	1
mir-82-5p	0	1
mir-1822-5p	-2.12031	0.180486
mir-83-5p	0	1
mir-84-3p	0	1
mir-231-5p	-1.25533	0.473869
mir-86-3p	-0.706378	0.171701
mir-85-5p	0	1
mir-2209.1-3p	-0.518512	0.521116
mir-66-3p	0	1
mir-251-5p	-0.180917	0.663373
mir-4916-5p	0	1
mir-90-5p	0.625241	0.556461

## Sheet: DP degron Control 300mM NaCl
2-cell embryo miRNA seq derived from DP degron Control adult exposed to 300mM NaCl vs 50mM NaCl
miRNA in bold correspond to DE miRNAs (log2 fold change ≤ -0.5 or ≥ 0.5 and p-value ≤ 0.05) and Yolk-enriched miRNAs are labelled in green. Results from three biological replicates.
miRNA name	log2(FC)	FDR
mir-85-3p	3.47292	4.98e-14
mir-244-5p	-0.862057	0.0659284
mir-237-5p	2.72967	1.11e-13
let-7-5p	2.66939	1.11e-13
mir-786-3p	2.50997	1.96e-10
mir-240-3p	2.92519	9.77e-14
lin-4-5p	2.99483	1.32e-14
mir-233-3p	-0.462045	0.282299
mir-48-5p	2.61444	1.61e-13
mir-236-3p	-1.11052	0.0166211
mir-84-5p	2.33577	3.31e-08
mir-230-3p	2.70565	0.00669074
mir-77-3p	2.17113	1.45e-07
mir-49-3p	-0.845224	0.0697207
mir-238-3p	1.61608	4.76e-05
mir-239.1-5p	1.72633	0.000382324
mir-77-5p	2.80146	0.00669074
mir-246-3p	2.17582	4.06e-09
mir-34-5p	2.80948	8.33e-10
mir-2-3p	-0.772912	0.0801408
mir-241-5p	0.963757	0.471448
mir-63-3p	0.34484	0.297809
mir-42-3p	-0.231153	0.399009
mir-243-3p	1.39633	0.0770815
mir-58.1-3p	0.0480045	0.826843
mir-245-3p	-0.348016	0.309508
mir-232-3p	-0.57957	0.29211
mir-55-3p	-0.316661	0.378128
mir-44-3p	-0.0273063	0.877029
mir-74-3p	-0.488876	0.256949
mir-239.2-5p	0	1
mir-52-5p	-0.356793	0.12178
mir-234-3p	-0.83431	0.0685449
mir-57-5p	-0.435024	0.154544
mir-241-3p	0	1
mir-58.1-5p	0.381423	0.317464
mir-235-3p	0.777075	0.0840269
mir-45-3p	-0.018081	0.874998
mir-1-3p	-0.143057	0.646664
mir-80-3p	1.11972	0.00754077
mir-46-3p	-0.649913	0.196526
mir-250-3p	0.00528813	0.91767
mir-56-3p	-0.255574	0.359316
mir-82-3p	0.637796	0.143196
mir-252-5p	-0.47175	0.197084
mir-253-3p	0.111274	0.784853
mir-259-5p	0.147268	0.787774
mir-70-3p	0.766186	0.0929066
mir-73-3p	-0.0712821	0.82529
mir-242-5p	-0.935074	0.0718081
mir-71-5p	0.799173	0.0659284
mir-231-3p	-0.704547	0.108452
mir-35-3p	-0.00917893	0.859578
mir-124-3p	-1.09984	0.019264
mir-86-5p	-0.50145	0.244141
mir-356.2-3p	0	1
mir-36-3p	-0.0655407	0.650603
mir-83-3p	-1.05496	0.107447
mir-37-3p	-0.0604029	0.844325
mir-38-3p	-0.169284	0.594646
mir-81-3p	0.571515	0.192262
mir-40-3p	-0.148681	0.552804
mir-41-3p	-0.427185	0.243417
mir-53-5p	-0.30855	0.399879
mir-79-3p	-0.669218	0.128432
mir-355-5p	-0.578663	0.238571
mir-228-5p	-0.414263	0.297752
mir-67-3p	-0.929159	0.0482676
mir-795-5p	2.57557	0.188993
mir-76-3p	-1.06065	0.0226175
mir-51-5p	-0.133701	0.615528
mir-248-3p	0	1
mir-59-3p	0.522564	0.252969
mir-60-3p	0.244529	0.453598
mir-64-5p	0.182268	0.504566
mir-65-5p	0.0794021	0.663506
mir-66-5p	0.0340677	0.803561
mir-46-5p	-0.505974	0.252969
mir-80-5p	-0.0335928	0.755854
mir-47-3p	0.529242	0.270712
mir-72-5p	-0.188404	0.391389
mir-75-3p	0	1
mir-47-5p	0.140732	0.711453
mir-90-3p	-0.218206	0.550177
F39B1.3-5p	0	1
let-7-3p	0	1
lin-4-3p	0	1
mir-48-3p	0	1
lsy-6-3p	0	1
lsy-6-5p	0	1
mir-1018-3p	0	1
mir-1019-3p	0	1
mir-1019-5p	0	1
mir-1020-3p	0	1
mir-1020-5p	0	1
mir-1021-5p	0	1
mir-1022-3p	0	1
mir-1-5p	0	1
mir-1817-5p	0	1
mir-1818-5p	0	1
mir-1819-3p	0	1
mir-1819-5p	0	1
mir-1820-3p	0	1
mir-1821-3p	0	1
mir-1821-5p	0	1
mir-1823-3p	0	1
mir-1823-5p	0	1
mir-1824-3p	0	1
mir-1824-5p	0	1
mir-1828-3p	0	1
mir-1829.1-3p	0	1
mir-1829.1-5p	0	1
mir-1829.2-3p	0	1
mir-1829.2-5p	-0.333052	0.258796
mir-1829.3-3p	0	1
mir-1830-3p	0	1
mir-1830-5p	0	1
mir-1832.1-3p	0	1
mir-1832.1-5p	0	1
mir-1832.2-3p	0	1
mir-1832.2-5p	0	1
mir-1833-3p	0	1
mir-2207-3p	0	1
mir-2207-5p	0	1
mir-2208.1-3p	0	1
mir-2208.1-5p	0	1
mir-2208.2-3p	0	1
mir-2208.2-5p	0	1
mir-2209.1-5p	0	1
mir-2209.2-3p	0	1
mir-2209.2-5p	0	1
mir-2209.3-3p	0	1
mir-2209.3-5p	0	1
mir-2210-3p	0	1
mir-2210-5p	0	1
mir-2211-3p	0	1
mir-2211-5p	0	1
mir-2212-3p	0	1
mir-2212-5p	0	1
mir-2213-3p	0	1
mir-2213-5p	0	1
mir-2214-5p	0.241826	0.515069
mir-2215-3p	0	1
mir-2215-5p	0	1
mir-2216-3p	0	1
mir-2216-5p	0	1
mir-2217.1-3p	0	1
mir-2217.1-5p	0	1
mir-2217.2-3p	0	1
mir-2217.2-5p	0	1
mir-2217.3-3p	0	1
mir-2217.3-5p	0	1
mir-2217.4-3p	0	1
mir-2217.4-5p	0	1
mir-2217.5-3p	0	1
mir-2217.5-5p	0	1
mir-2218.1-3p	0	1
mir-2218.1-5p	0	1
mir-2218.2-3p	0	1
mir-2218.2-5p	0	1
mir-2219-3p	0	1
mir-2219-5p	0	1
mir-2220-3p	0	1
mir-2220-5p	0	1
mir-2221-3p	0	1
mir-228-3p	0	1
mir-229-5p	-0.145056	0.58335
mir-232-5p	0	1
mir-233-5p	0	1
mir-234-5p	0	1
mir-237-3p	0	1
mir-239.1-3p	0	1
mir-239.2-3p	0	1
mir-353-5p	0.197281	0.588895
mir-39-5p	1.24732	0.0117033
mir-244-3p	0	1
mir-245-5p	0	1
mir-246-5p	0	1
mir-247-3p	0	1
mir-247-5p	0	1
mir-249-3p	0	1
mir-249-5p	0	1
mir-252-3p	0	1
mir-253-5p	0	1
mir-72-3p	0.112009	0.720662
mir-254-5p	0	1
mir-255-3p	0	1
mir-255-5p	0	1
mir-256-3p	0	1
mir-257-5p	0	1
mir-258.1-5p	0	1
mir-258.2-5p	0	1
mir-259-3p	0	1
mir-261-3p	0	1
mir-262-3p	0.124669	0.916961
mir-264-3p	0	1
mir-265-3p	0	1
mir-266-5p	0	1
mir-267-5p	0	1
mir-268-5p	0	1
mir-269-5p	0	1
mir-270-3p	0	1
mir-271-5p	0	1
mir-272-3p	0	1
mir-273-3p	0	1
mir-2953-3p	0	1
mir-2953-5p	0	1
mir-355-3p	0	1
mir-34-3p	0	1
mir-356.1-5p	0	1
mir-356.2-5p	0	1
mir-4923.2-3p	0	1
mir-357-5p	0	1
mir-358-3p	0	1
mir-358-5p	0	1
mir-359-3p	0	1
mir-360-3p	0	1
mir-360-5p	0	1
mir-238-5p	0	1
mir-392-3p	0	1
mir-392-5p	0	1
mir-39-3p	0.113806	0.602203
mir-87-5p	0.103699	0.780854
mir-40-5p	0	1
mir-41-5p	0.0763346	0.799386
mir-8191-5p	0.78592	0.110949
mir-4807-3p	0.431924	0.690034
mir-35-5p	0.803424	0.140139
mir-63-5p	1.30078	0.141351
mir-54-5p	-0.530873	0.221563
mir-230-5p	0	1
mir-4805-3p	0	1
mir-4805-5p	0	1
mir-4806-3p	0	1
mir-4806-5p	0	1
mir-43-3p	-0.365891	0.214779
mir-4808-3p	0	1
mir-4808-5p	0	1
mir-4809-3p	0	1
mir-4809-5p	0	1
mir-4810.1-3p	0	1
mir-4810.2-3p	0	1
mir-4810.2-5p	0	1
mir-4811-3p	0	1
mir-4811-5p	0	1
mir-4812-3p	0	1
mir-44-5p	0.472474	0.294219
mir-2-5p	-0.845219	0.0659284
mir-4813-5p	0	1
mir-4814-3p	0	1
mir-4814-5p	0	1
mir-4815-3p	0	1
mir-4916-3p	-0.160069	0.596589
mir-49-5p	-1.27298	0.0225959
mir-4920-5p	0	1
mir-4921-3p	0	1
mir-4922.1-3p	0	1
mir-4922.2-3p	0	1
mir-4923.1-3p	0	1
mir-787-3p	0	1
mir-4924-5p	0	1
mir-4925-3p	0	1
mir-4926-5p	0	1
mir-4927-5p	0	1
mir-4929-3p	0	1
mir-4930-5p	0	1
mir-4931-3p	0	1
mir-4932-5p	0	1
mir-4933-5p	0	1
mir-4934-3p	0	1
mir-4935-5p	0	1
mir-73-5p	0.581177	0.191164
mir-4937-5p	0	1
mir-4938-5p	0	1
mir-357-3p	0	1
mir-50-3p	0	1
mir-54-3p	-0.55416	0.214418
mir-37-5p	1.05661	0.0368278
mir-4936-3p	0.59701	0.214418
mir-124-5p	-1.60369	0.146128
mir-53-3p	0	1
mir-79-5p	-0.912696	0.221563
mir-52-3p	-0.248454	0.453376
mir-240-5p	0	1
mir-235-5p	-1.3483	0.0173766
mir-5545-3p	0	1
mir-5545-5p	0	1
mir-5546-3p	0	1
mir-5546-5p	0	1
mir-5547-3p	0	1
mir-5547-5p	0	1
mir-5548-3p	0	1
mir-5548-5p	0	1
mir-5549-3p	0	1
mir-5549-5p	0	1
mir-5550-3p	0	1
mir-5550-5p	0	1
mir-5551-3p	0	1
mir-5551-5p	0	1
mir-5552-3p	0	1
mir-5552-5p	0	1
mir-5553-3p	0	1
mir-5553-5p	0	1
mir-55-5p	0	1
mir-71-3p	0.636772	0.254156
mir-5592.1-5p	0	1
mir-1829.3-5p	-0.324872	0.299182
mir-5592.2-5p	0	1
mir-5593.1-3p	0	1
mir-5593.1-5p	0	1
mir-5593.2-3p	0	1
mir-5593.2-5p	0	1
mir-5594-3p	0	1
mir-5594-5p	0	1
mir-5595-3p	0	1
mir-5595-5p	0	1
mir-50-5p	-0.173993	0.549149
mir-74-5p	1.29814	0.132191
mir-57-3p	0	1
mir-81-5p	-0.106241	0.849337
mir-236-5p	0.0980952	0.902746
mir-87-3p	-0.384937	0.222799
mir-58.2-3p	0	1
mir-58.2-5p	0	1
miR58Synth	0	1
mir-250-5p	0.145024	0.663497
mir-59-5p	0	1
mir-5592.2-3p	0	1
mir-61-3p	0.131104	0.643783
mir-61-5p	0.380428	0.365652
mir-789.2-5p	0	1
mir-38-5p	-0.516892	0.241389
mir-65-3p	0	1
mir-62-3p	-1.14149	0.0787218
mir-260-3p	-0.796547	0.0929066
mir-5592.1-3p	0.625528	0.456529
mir-243-5p	0	1
mir-70-5p	0	1
mir-254-3p	-0.798038	0.362961
mir-798-3p	0	1
mir-45-5p	0	1
mir-36-5p	0	1
mir-75-5p	0	1
mir-64-3p	1.213	0.290486
mir-76-5p	0	1
mir-4813-3p	-1.1489	0.151041
mir-8196.2-3p	0	1
mir-78-3p	0	1
mir-784-3p	0	1
mir-784-5p	0	1
mir-785-3p	0	1
mir-785-5p	0	1
mir-43-5p	1.30311	0.278896
mir-786-5p	0	1
mir-354-3p	0	1
mir-787-5p	0	1
mir-788-3p	0	1
mir-788-5p	0	1
mir-789.1-3p	0	1
mir-789.1-5p	0	1
mir-789.2-3p	0	1
mir-790-3p	-2.37578	0.301665
mir-790-5p	0	1
mir-791-3p	0	1
mir-791-5p	0	1
mir-792-3p	0	1
mir-792-5p	0	1
mir-229-3p	-0.527724	0.336456
mir-1822-3p	-1.06778	0.286195
mir-794-3p	0	1
mir-794-5p	0	1
mir-795-3p	0	1
mir-793-3p	-2.5038	0.347745
mir-51-3p	0.264119	0.708838
mir-796-5p	0	1
mir-797-3p	0	1
mir-797-5p	0	1
mir-4812-5p	0	1
mir-799-3p	0	1
mir-800-3p	0	1
mir-800-5p	0	1
mir-1820-5p	-0.897758	0.44425
mir-60-5p	0.780856	0.452648
mir-67-5p	-0.859686	0.330731
mir-42-5p	0.80253	0.252969
mir-8186.1-3p	0	1
mir-8186.1-5p	0	1
mir-8186.2-3p	0	1
mir-8186.2-5p	0	1
mir-8187-3p	0	1
mir-8187-5p	0	1
mir-8188-3p	0	1
mir-8188-5p	0	1
mir-8189-3p	0	1
mir-8189-5p	0	1
mir-8190-3p	0	1
mir-8190-5p	0	1
mir-8191-3p	0	1
mir-56-5p	-0.290785	0.713276
mir-8192-3p	0	1
mir-8192-5p	0	1
mir-8193-3p	0	1
mir-8193-5p	0	1
mir-8194-3p	0	1
mir-8194-5p	0	1
mir-8195-3p	0	1
mir-8195-5p	0	1
mir-1022-5p	-1.71501	0.467221
mir-8196.1-5p	0	1
mir-2214-3p	0.477945	0.27315
mir-8196.2-5p	0	1
mir-8197-3p	0	1
mir-8197-5p	0	1
mir-8198-5p	0	1
mir-8200-3p	0	1
mir-8200-5p	0	1
mir-8201-3p	0	1
mir-8201-5p	0	1
mir-8202-3p	0	1
mir-8203-3p	0	1
mir-8203-5p	0	1
mir-8204-3p	0	1
mir-8204-5p	0	1
mir-8205-3p	0	1
mir-8205-5p	0	1
mir-8206-3p	0	1
mir-8206-5p	0	1
mir-8207-3p	0	1
mir-8207-5p	0	1
mir-8208-3p	0	1
mir-8208-5p	0	1
mir-8209-3p	0	1
mir-8209-5p	0	1
mir-8210-3p	0	1
mir-8210-5p	0	1
mir-8211-3p	0	1
mir-8211-5p	0	1
mir-8212-3p	0	1
mir-8212-5p	0	1
mir-8196.1-3p	-0.574293	0.472258
mir-82-5p	0	1
mir-1822-5p	-1.47199	0.519658
mir-83-5p	0	1
mir-84-3p	0	1
mir-231-5p	0	1
mir-86-3p	-1.10316	0.0564819
mir-85-5p	0	1
mir-2209.1-3p	0	1
mir-66-3p	0	1
mir-251-5p	-1.5679	0.0898616
mir-4916-5p	-1.05326	0.299201
mir-90-5p	-0.455804	0.638098

## Sheet: DP degron Auxin 300mM NaCl
2-cell embryo miRNA seq derived from DP degron Auxin adult exposed to 300mM NaCl vs 50mM NaCl
miRNA in bold correspond to DE miRNAs (log2 fold change ≤ -0.5 or ≥ 0.5 and p-value ≤ 0.05) and Yolk-enriched miRNAs are labelled in green. Results from three biological replicates.
miRNA name	log2(FC)	FDR
mir-85-3p	1.48632	2.51e-08
mir-244-5p	-1.88857	6.75e-11
mir-237-5p	-0.0212811	0.822873
let-7-5p	-0.310908	0.225121
mir-786-3p	0.863916	0.0011322
mir-240-3p	1.11685	2.58e-05
lin-4-5p	-0.34193	0.186722
mir-233-3p	-1.47501	1.88e-07
mir-48-5p	-0.428258	0.0858487
mir-236-3p	-1.73053	1.08e-06
mir-84-5p	-0.397583	0.137952
mir-230-3p	-0.449442	0.267971
mir-77-3p	0.352295	0.410839
mir-49-3p	-1.22401	1.21e-06
mir-238-3p	-0.0246477	0.914741
mir-239.1-5p	-0.342124	0.284614
mir-77-5p	0	1
mir-246-3p	-0.456873	0.0822611
mir-34-5p	0.194488	0.415789
mir-2-3p	-1.52071	1.85e-06
mir-241-5p	-0.1059	0.787943
mir-63-3p	-1.84095	0.00303063
mir-42-3p	-0.864279	3.35e-05
mir-243-3p	-0.228683	0.693758
mir-58.1-3p	-0.77314	0.000112735
mir-245-3p	-1.17969	0.00015026
mir-232-3p	-2.05897	0.00015026
mir-55-3p	-0.778178	0.000208242
mir-44-3p	-0.946666	0.00024403
mir-74-3p	-1.12386	0.000321289
mir-239.2-5p	0	1
mir-52-5p	-0.602728	0.000502259
mir-234-3p	-0.987935	0.000724286
mir-57-5p	-0.80782	0.000782806
mir-241-3p	0	1
mir-58.1-5p	-0.987719	0.0008875
mir-235-3p	-0.0825573	0.680411
mir-45-3p	-0.820093	0.00138162
mir-1-3p	-0.81326	0.00157491
mir-80-3p	-0.293243	0.127353
mir-46-3p	-0.995048	0.00194978
mir-250-3p	0.298369	0.194084
mir-56-3p	-0.645961	0.00206747
mir-82-3p	-0.658653	0.00206971
mir-252-5p	-0.424147	0.164033
mir-253-3p	0.0554573	0.691761
mir-259-5p	0.348099	0.367395
mir-70-3p	-0.405248	0.105424
mir-73-3p	-0.635836	0.00268731
mir-242-5p	-2.3088	0.00282915
mir-71-5p	-0.702448	0.000791701
mir-231-3p	-1.72422	8.21e-09
mir-35-3p	-0.183519	0.143606
mir-124-3p	-1.3597	3.39e-05
mir-86-5p	-0.765555	0.00374548
mir-356.2-3p	0	1
mir-36-3p	-0.024506	0.820825
mir-83-3p	-0.278614	0.522238
mir-37-3p	-0.258875	0.0630946
mir-38-3p	0.0769136	0.673868
mir-81-3p	-0.60269	0.00473653
mir-40-3p	0.191724	0.194701
mir-41-3p	0.236063	0.290463
mir-53-5p	-0.643668	0.00958039
mir-79-3p	-0.358449	0.179718
mir-355-5p	-1.22933	0.0145897
mir-228-5p	-0.520696	0.021764
mir-67-3p	-0.770723	0.0353823
mir-795-5p	-1.10826	0.0412318
mir-76-3p	-1.19738	1.85e-05
mir-51-5p	0.229432	0.0689417
mir-248-3p	0	1
mir-59-3p	0.583877	0.0567811
mir-60-3p	-0.903868	0.0572587
mir-64-5p	-0.256246	0.226082
mir-65-5p	-0.447309	0.0425324
mir-66-5p	-0.0720157	0.562847
mir-46-5p	-0.46334	0.13151
mir-80-5p	-0.522953	0.0773371
mir-47-3p	-0.143714	0.632351
mir-72-5p	-0.0572611	0.625054
mir-75-3p	0	1
mir-47-5p	-0.663515	0.132068
mir-90-3p	-0.00889935	0.928209
F39B1.3-5p	0	1
let-7-3p	0	1
lin-4-3p	0	1
mir-48-3p	0	1
lsy-6-3p	0	1
lsy-6-5p	0	1
mir-1018-3p	0	1
mir-1019-3p	0	1
mir-1019-5p	0	1
mir-1020-3p	0	1
mir-1020-5p	0	1
mir-1021-5p	0	1
mir-1022-3p	0	1
mir-1-5p	0	1
mir-1817-5p	0	1
mir-1818-5p	0	1
mir-1819-3p	0	1
mir-1819-5p	0	1
mir-1820-3p	0	1
mir-1821-3p	0	1
mir-1821-5p	0	1
mir-1823-3p	0	1
mir-1823-5p	0	1
mir-1824-3p	0	1
mir-1824-5p	0	1
mir-1828-3p	0	1
mir-1829.1-3p	0	1
mir-1829.1-5p	0	1
mir-1829.2-3p	0	1
mir-1829.2-5p	-0.119862	0.621024
mir-1829.3-3p	0	1
mir-1830-3p	0	1
mir-1830-5p	0	1
mir-1832.1-3p	0	1
mir-1832.1-5p	0	1
mir-1832.2-3p	0	1
mir-1832.2-5p	0	1
mir-1833-3p	0	1
mir-2207-3p	0	1
mir-2207-5p	0	1
mir-2208.1-3p	0	1
mir-2208.1-5p	0	1
mir-2208.2-3p	0	1
mir-2208.2-5p	0	1
mir-2209.1-5p	0	1
mir-2209.2-3p	0	1
mir-2209.2-5p	0	1
mir-2209.3-3p	0	1
mir-2209.3-5p	0	1
mir-2210-3p	0	1
mir-2210-5p	0	1
mir-2211-3p	0	1
mir-2211-5p	0	1
mir-2212-3p	0	1
mir-2212-5p	0	1
mir-2213-3p	0	1
mir-2213-5p	0	1
mir-2214-5p	0.412451	0.0757323
mir-2215-3p	0	1
mir-2215-5p	0	1
mir-2216-3p	0	1
mir-2216-5p	0	1
mir-2217.1-3p	0	1
mir-2217.1-5p	0	1
mir-2217.2-3p	0	1
mir-2217.2-5p	0	1
mir-2217.3-3p	0	1
mir-2217.3-5p	0	1
mir-2217.4-3p	0	1
mir-2217.4-5p	0	1
mir-2217.5-3p	0	1
mir-2217.5-5p	0	1
mir-2218.1-3p	0	1
mir-2218.1-5p	0	1
mir-2218.2-3p	0	1
mir-2218.2-5p	0	1
mir-2219-3p	0	1
mir-2219-5p	0	1
mir-2220-3p	0	1
mir-2220-5p	0	1
mir-2221-3p	0	1
mir-228-3p	0	1
mir-229-5p	-0.220506	0.304668
mir-232-5p	0	1
mir-233-5p	0	1
mir-234-5p	0	1
mir-237-3p	0	1
mir-239.1-3p	0	1
mir-239.2-3p	0	1
mir-353-5p	-0.415665	0.200103
mir-39-5p	-1.02523	0.00144739
mir-244-3p	0	1
mir-245-5p	0	1
mir-246-5p	0	1
mir-247-3p	0	1
mir-247-5p	0	1
mir-249-3p	0	1
mir-249-5p	0	1
mir-252-3p	0	1
mir-253-5p	0	1
mir-72-3p	-0.466953	0.16516
mir-254-5p	0	1
mir-255-3p	0	1
mir-255-5p	0	1
mir-256-3p	0	1
mir-257-5p	0	1
mir-258.1-5p	0	1
mir-258.2-5p	0	1
mir-259-3p	0	1
mir-261-3p	0	1
mir-262-3p	0	1
mir-264-3p	0	1
mir-265-3p	0	1
mir-266-5p	0	1
mir-267-5p	0	1
mir-268-5p	0	1
mir-269-5p	0	1
mir-270-3p	0	1
mir-271-5p	0	1
mir-272-3p	0	1
mir-273-3p	0	1
mir-2953-3p	0	1
mir-2953-5p	0	1
mir-355-3p	0	1
mir-34-3p	0	1
mir-356.1-5p	0	1
mir-356.2-5p	0	1
mir-4923.2-3p	-0.210053	0.706308
mir-357-5p	0	1
mir-358-3p	0	1
mir-358-5p	0	1
mir-359-3p	0	1
mir-360-3p	0	1
mir-360-5p	0	1
mir-238-5p	0	1
mir-392-3p	0	1
mir-392-5p	0	1
mir-39-3p	-0.0467151	0.651743
mir-87-5p	-0.461727	0.486841
mir-40-5p	0	1
mir-41-5p	-0.439989	0.0819882
mir-8191-5p	0.25055	0.321584
mir-4807-3p	0	1
mir-35-5p	-0.0826505	0.825932
mir-63-5p	0	1
mir-54-5p	-1.57249	1.88e-07
mir-230-5p	0.108003	0.911504
mir-4805-3p	0	1
mir-4805-5p	0	1
mir-4806-3p	0	1
mir-4806-5p	0	1
mir-43-3p	-1.31382	1.72e-05
mir-4808-3p	0	1
mir-4808-5p	0	1
mir-4809-3p	0	1
mir-4809-5p	0	1
mir-4810.1-3p	0	1
mir-4810.2-3p	0	1
mir-4810.2-5p	0	1
mir-4811-3p	0	1
mir-4811-5p	0	1
mir-4812-3p	0	1
mir-44-5p	-1.26897	0.00017349
mir-2-5p	-1.08187	0.0001761
mir-4813-5p	0	1
mir-4814-3p	0	1
mir-4814-5p	0	1
mir-4815-3p	0	1
mir-4916-3p	0.284195	0.387018
mir-49-5p	-1.48351	0.00130422
mir-4920-5p	0	1
mir-4921-3p	0	1
mir-4922.1-3p	0	1
mir-4922.2-3p	0	1
mir-4923.1-3p	0	1
mir-787-3p	0	1
mir-4924-5p	0	1
mir-4925-3p	0	1
mir-4926-5p	0	1
mir-4927-5p	0	1
mir-4929-3p	0	1
mir-4930-5p	0	1
mir-4931-3p	0	1
mir-4932-5p	0	1
mir-4933-5p	0	1
mir-4934-3p	0	1
mir-4935-5p	0	1
mir-73-5p	-0.0900663	0.739131
mir-4937-5p	0.11614	0.794199
mir-4938-5p	0	1
mir-357-3p	1.93795	0.0013357
mir-50-3p	0	1
mir-54-3p	-0.720862	0.00401298
mir-37-5p	-0.924592	0.00904995
mir-4936-3p	0.142624	0.483605
mir-124-5p	-1.86201	0.0102156
mir-53-3p	0	1
mir-79-5p	-1.4802	0.0104105
mir-52-3p	-2.09062	0.01535
mir-240-5p	0.353509	0.438731
mir-235-5p	-3.41068	0.0172151
mir-5545-3p	0	1
mir-5545-5p	0	1
mir-5546-3p	0	1
mir-5546-5p	0	1
mir-5547-3p	0	1
mir-5547-5p	0	1
mir-5548-3p	0	1
mir-5548-5p	0	1
mir-5549-3p	0	1
mir-5549-5p	0	1
mir-5550-3p	0	1
mir-5550-5p	0	1
mir-5551-3p	0	1
mir-5551-5p	0	1
mir-5552-3p	0	1
mir-5552-5p	0	1
mir-5553-3p	0	1
mir-5553-5p	0	1
mir-55-5p	0	1
mir-71-3p	-0.864514	0.0206953
mir-5592.1-5p	0	1
mir-1829.3-5p	-0.355591	0.291973
mir-5592.2-5p	0	1
mir-5593.1-3p	0	1
mir-5593.1-5p	0	1
mir-5593.2-3p	0	1
mir-5593.2-5p	0	1
mir-5594-3p	0	1
mir-5594-5p	0	1
mir-5595-3p	0	1
mir-5595-5p	0	1
mir-50-5p	-0.566071	0.0290283
mir-74-5p	-1.10135	0.0328616
mir-57-3p	0	1
mir-81-5p	-2.30581	0.0339995
mir-236-5p	0	1
mir-87-3p	-0.579597	0.0447622
mir-58.2-3p	0	1
mir-58.2-5p	0	1
miR58Synth	0	1
mir-250-5p	0.531557	0.0477928
mir-59-5p	0	1
mir-5592.2-3p	-1.10685	0.0562695
mir-61-3p	0.236963	0.226481
mir-61-5p	-0.207604	0.498047
mir-789.2-5p	0	1
mir-38-5p	0.402753	0.120984
mir-65-3p	0	1
mir-62-3p	-1.55888	0.0626141
mir-260-3p	-0.742315	0.0673516
mir-5592.1-3p	-0.902222	0.0742338
mir-243-5p	0	1
mir-70-5p	0	1
mir-254-3p	-1.61794	0.0827072
mir-798-3p	1.15897	0.0889727
mir-45-5p	-5.35271	0.0904598
mir-36-5p	0	1
mir-75-5p	0	1
mir-64-3p	0.103738	0.786097
mir-76-5p	0	1
mir-4813-3p	-0.887937	0.0992566
mir-8196.2-3p	0	1
mir-78-3p	0	1
mir-784-3p	0	1
mir-784-5p	0	1
mir-785-3p	0	1
mir-785-5p	0	1
mir-43-5p	-1.06439	0.124622
mir-786-5p	0	1
mir-354-3p	1.42989	0.129978
mir-787-5p	0	1
mir-788-3p	0	1
mir-788-5p	0	1
mir-789.1-3p	0	1
mir-789.1-5p	0	1
mir-789.2-3p	0	1
mir-790-3p	0	1
mir-790-5p	0	1
mir-791-3p	0	1
mir-791-5p	0	1
mir-792-3p	0	1
mir-792-5p	0	1
mir-229-3p	-0.351545	0.438052
mir-1822-3p	-0.665553	0.146902
mir-794-3p	0	1
mir-794-5p	0	1
mir-795-3p	0	1
mir-793-3p	0	1
mir-51-3p	-0.553663	0.165298
mir-796-5p	0	1
mir-797-3p	0	1
mir-797-5p	0	1
mir-4812-5p	0.823281	0.253819
mir-799-3p	0	1
mir-800-3p	0	1
mir-800-5p	0	1
mir-1820-5p	0	1
mir-60-5p	0	1
mir-67-5p	-0.500355	0.257173
mir-42-5p	-0.6103	0.273643
mir-8186.1-3p	0	1
mir-8186.1-5p	0	1
mir-8186.2-3p	0	1
mir-8186.2-5p	0	1
mir-8187-3p	0	1
mir-8187-5p	0	1
mir-8188-3p	0	1
mir-8188-5p	0	1
mir-8189-3p	0	1
mir-8189-5p	0	1
mir-8190-3p	0	1
mir-8190-5p	0	1
mir-8191-3p	0	1
mir-56-5p	0	1
mir-8192-3p	0	1
mir-8192-5p	0	1
mir-8193-3p	0	1
mir-8193-5p	0	1
mir-8194-3p	0	1
mir-8194-5p	0	1
mir-8195-3p	0	1
mir-8195-5p	0	1
mir-1022-5p	0	1
mir-8196.1-5p	0	1
mir-2214-3p	0.251461	0.253363
mir-8196.2-5p	0	1
mir-8197-3p	0	1
mir-8197-5p	0	1
mir-8198-5p	0	1
mir-8200-3p	0	1
mir-8200-5p	0	1
mir-8201-3p	0	1
mir-8201-5p	0	1
mir-8202-3p	0	1
mir-8203-3p	0	1
mir-8203-5p	0	1
mir-8204-3p	0	1
mir-8204-5p	0	1
mir-8205-3p	0	1
mir-8205-5p	0	1
mir-8206-3p	0	1
mir-8206-5p	0	1
mir-8207-3p	0	1
mir-8207-5p	0	1
mir-8208-3p	0	1
mir-8208-5p	0	1
mir-8209-3p	0	1
mir-8209-5p	0	1
mir-8210-3p	0	1
mir-8210-5p	0	1
mir-8211-3p	0	1
mir-8211-5p	0	1
mir-8212-3p	0	1
mir-8212-5p	0	1
mir-8196.1-3p	-0.244763	0.650128
mir-82-5p	0	1
mir-1822-5p	0	1
mir-83-5p	0	1
mir-84-3p	0	1
mir-231-5p	0	1
mir-86-3p	-0.696445	0.279252
mir-85-5p	0	1
mir-2209.1-3p	0	1
mir-66-3p	0.725301	0.279829
mir-251-5p	-2.39726	0.356549
mir-4916-5p	-0.512568	0.372872
mir-90-5p	0	1

## Sheet: Wild-type starvation
2-cell embryo miRNA seq derived from wild-type adult starved for 24h compared to control.
miRNA in bold correspond to DE miRNAs (log2 fold change ≤ -0.5 or ≥ 0.5 and p-value ≤ 0.05) and Yolk-enriched miRNAs are labelled in green. Results from two biological replicates.
miRNA name	log2(FC)	FDR
let-7-5p	-5.85845	7.70859e-34
mir-48-5p	-4.86698	7.70859e-34
mir-237-5p	-6.27436	1.31016e-19
lin-4-5p	-6.06725	1.43027e-18
mir-246-3p	-3.11271	1.45377e-14
mir-786-3p	-3.40998	1.2703e-13
mir-1-3p	0.205174	0.666023
mir-84-5p	-3.67617	3.869e-13
mir-70-3p	-2.56197	4.09806e-13
mir-238-3p	-2.42155	1.43777e-12
mir-240-3p	-2.88168	1.38176e-11
mir-77-3p	-8.19764	6.32529e-11
mir-77-5p	-8.07613	9.84165e-09
mir-85-3p	-4.46287	1.13523e-08
mir-241-5p	-2.92558	1.50367e-06
mir-71-5p	-1.33214	3.73868e-06
mir-57-5p	1.5226	5.4669e-06
mir-239.1-5p	-2.39647	5.81198e-06
mir-42-3p	1.35581	6.79837e-06
mir-34-5p	-2.20907	4.1782e-05
mir-49-3p	1.41797	0.000102828
mir-52-5p	0.997161	0.000337782
mir-230-3p	-3.23477	0.00173133
mir-76-3p	1.29368	0.0024263
mir-232-3p	0.285208	0.602624
mir-244-5p	1.23424	0.00254243
mir-228-5p	1.03882	0.0026131
mir-795-5p	-4.51685	0.00328432
mir-235-3p	0.171776	0.596083
mir-233-3p	1.304	0.00429063
mir-236-3p	0.0920649	0.737114
mir-73-3p	0.873612	0.00745743
mir-74-3p	1.08016	0.0107623
mir-80-3p	-0.83632	0.0111792
mir-45-3p	1.00382	0.0139439
mir-44-3p	0.984626	0.0158384
mir-239.2-5p	0	1
mir-2-3p	0.208055	0.763708
mir-55-3p	0.782133	0.017639
mir-80-5p	-1.06585	0.0330825
mir-253-3p	-0.852766	0.0436271
mir-90-3p	0.634009	0.0475194
mir-86-5p	0.867252	0.0481049
mir-243-3p	-0.343511	0.614053
mir-245-3p	0.192103	0.741924
mir-250-3p	-0.204186	0.603467
mir-259-5p	-0.15771	0.849428
mir-35-3p	-0.11087	0.628683
mir-355-5p	0.29596	0.706477
mir-356.2-3p	0.183665	0.753893
mir-231-3p	0.845249	0.0644278
mir-36-3p	-0.00420734	0.922545
mir-37-3p	-0.302454	0.139434
mir-38-3p	-0.0358315	0.763266
mir-40-3p	0.146048	0.675266
mir-41-3p	-0.0430826	0.879375
mir-234-3p	0.829358	0.0829584
mir-46-5p	0.920895	0.0863422
mir-67-3p	0.921061	0.09033
mir-47-3p	-0.235463	0.775601
mir-75-3p	-3.05526	0.09033
mir-63-3p	-0.845161	0.103413
mir-51-5p	-0.318395	0.240884
mir-56-3p	0.556528	0.133629
mir-53-5p	0.259731	0.560773
mir-124-3p	0.91629	0.138622
mir-248-3p	-1.12769	0.153365
mir-58.1-3p	-0.271771	0.350301
mir-59-3p	0.0528359	0.8516
mir-60-3p	-0.383929	0.402517
mir-242-5p	0.703764	0.247431
mir-64-5p	0.0627929	0.864211
mir-65-5p	-0.125293	0.713184
mir-66-5p	0.0672806	0.780749
mir-47-5p	-0.657181	0.256117
mir-252-5p	0.542695	0.260034
mir-58.1-5p	0.595791	0.267761
mir-72-5p	-0.130473	0.628234
mir-241-3p	-1.78858	0.356521
mir-46-3p	0.598049	0.35906
mir-79-3p	0.199626	0.614365
mir-81-3p	-0.249623	0.504119
mir-82-3p	0.15571	0.736145
mir-83-3p	0.429063	0.464366
F39B1.3-5p	0	1
let-7-3p	0	1
lin-4-3p	0	1
mir-48-3p	0	1
lsy-6-3p	0.106432	0.882342
lsy-6-5p	0	1
mir-1019-3p	0	1
mir-1019-5p	0	1
mir-1020-3p	0	1
mir-1020-5p	0	1
mir-1021-5p	0	1
mir-1022-3p	0	1
mir-1022-5p	0.130147	0.772152
mir-1-5p	0	1
mir-1817-5p	0	1
mir-1818-5p	0	1
mir-1819-5p	0	1
mir-1820-3p	0	1
mir-1821-3p	0	1
mir-1821-5p	0	1
mir-1823-3p	0	1
mir-1823-5p	0	1
mir-1824-3p	0	1
mir-1824-5p	0	1
mir-1828-3p	0	1
mir-1829.1-3p	0	1
mir-1829.3-3p	0	1
mir-1830-5p	0	1
mir-1832.1-3p	0	1
mir-1832.1-5p	0.298898	0.802356
mir-1832.2-3p	0	1
mir-1832.2-5p	0	1
mir-1833-3p	0	1
mir-2207-3p	0	1
mir-2207-5p	0	1
mir-2208.1-3p	0	1
mir-2208.1-5p	0	1
mir-2208.2-3p	0	1
mir-2208.2-5p	0	1
mir-2209.1-5p	0	1
mir-2209.2-3p	0	1
mir-2209.2-5p	0	1
mir-2209.3-5p	0	1
mir-2210-3p	0	1
mir-2210-5p	0	1
mir-2211-3p	0	1
mir-2211-5p	0	1
mir-2212-3p	0	1
mir-2212-5p	0	1
mir-2213-3p	0	1
mir-2213-5p	0	1
mir-2214-5p	-0.398785	0.245631
mir-2215-3p	0	1
mir-2215-5p	0	1
mir-2216-3p	0	1
mir-2216-5p	0	1
mir-2217.1-3p	0	1
mir-2217.1-5p	0	1
mir-2217.2-3p	0	1
mir-2217.2-5p	0	1
mir-2217.3-3p	0	1
mir-2217.3-5p	0	1
mir-2217.4-3p	0	1
mir-2217.4-5p	0	1
mir-2217.5-3p	0	1
mir-2217.5-5p	0	1
mir-2218.1-3p	0	1
mir-2218.1-5p	0	1
mir-2218.2-3p	0	1
mir-2218.2-5p	0	1
mir-2219-3p	0	1
mir-2219-5p	0	1
mir-2220-3p	0.389717	0.862871
mir-2220-5p	0	1
mir-2221-3p	0	1
mir-229-3p	0.492048	0.504943
mir-229-5p	0.256277	0.464885
mir-231-5p	0.203545	0.793167
mir-232-5p	0	1
mir-234-5p	0	1
mir-237-3p	0	1
mir-239.1-3p	0	1
mir-239.2-3p	0	1
mir-1829.2-5p	-1.74462	3.48729e-05
mir-244-3p	0	1
mir-2214-3p	-1.29934	0.000597576
mir-245-5p	0	1
mir-5592.2-3p	-2.5013	0.000887227
mir-87-5p	2.13915	0.00286815
mir-247-3p	0	1
mir-247-5p	0	1
mir-353-5p	-1.82068	0.00492517
mir-357-3p	-4.91153	0.00492517
mir-249-5p	0	1
mir-250-5p	-0.223085	0.535188
mir-238-5p	-4.48454	0.0059494
mir-252-3p	0	1
mir-5592.1-3p	-1.94547	0.0059494
mir-124-5p	1.7071	0.0107623
mir-253-5p	0	1
mir-54-5p	1.21221	0.0112421
mir-254-5p	0	1
mir-87-3p	1.06642	0.015467
mir-255-5p	0	1
mir-256-3p	0	1
mir-257-5p	0.471293	0.686055
mir-258.1-5p	0	1
mir-258.2-5p	0	1
mir-259-3p	0	1
mir-2-5p	0.424558	0.426834
mir-230-5p	-4.26034	0.0318529
mir-261-3p	0	1
mir-262-3p	0.283166	0.830113
mir-264-3p	0	1
mir-265-3p	0	1
mir-266-5p	0	1
mir-267-5p	0	1
mir-268-5p	0	1
mir-269-5p	0	1
mir-270-3p	0	1
mir-271-5p	0	1
mir-272-3p	0	1
mir-273-3p	0	1
mir-2953-3p	0	1
mir-2953-5p	0	1
mir-34-3p	0	1
mir-260-3p	1.26133	0.0469907
mir-4813-3p	1.2301	0.0486741
mir-354-3p	0	1
mir-355-3p	0	1
mir-35-5p	-0.336065	0.661054
mir-356.1-5p	0	1
mir-356.2-5p	0	1
mir-5549-3p	-3.86459	0.0491788
mir-357-5p	0	1
mir-358-3p	0	1
mir-358-5p	0	1
mir-360-3p	0	1
mir-360-5p	0	1
mir-36-5p	-0.21341	0.853568
mir-240-5p	-3.41657	0.0644634
mir-38-5p	0.158386	0.679105
mir-392-3p	0	1
mir-392-5p	0	1
mir-39-3p	-0.323884	0.296471
mir-39-5p	0.0457734	0.819842
mir-40-5p	0	1
mir-41-5p	0.421939	0.293095
mir-5592.1-5p	-3.67261	0.0690159
mir-42-5p	0	1
mir-790-3p	3.05413	0.0747773
mir-235-5p	1.38883	0.0822124
mir-67-5p	1.77404	0.0830455
mir-1819-3p	2.5732	0.085091
mir-45-5p	-0.017646	0.967806
mir-4805-3p	0	1
mir-4805-5p	0	1
mir-4806-3p	0	1
mir-4806-5p	0	1
mir-4808-3p	0	1
mir-4808-5p	0	1
mir-4809-3p	0	1
mir-4809-5p	0	1
mir-4810.1-3p	0	1
mir-4810.2-3p	0	1
mir-4810.2-5p	0	1
mir-4811-3p	0	1
mir-4811-5p	0	1
mir-4812-3p	0	1
mir-4812-5p	0.0891752	0.836307
mir-79-5p	1.20273	0.10586
mir-4813-5p	-0.337384	0.882767
mir-4814-3p	0	1
mir-4814-5p	0	1
mir-4815-3p	0	1
mir-8191-5p	-1.01996	0.110879
mir-4916-5p	0	1
mir-4920-5p	0	1
mir-4921-3p	0	1
mir-4922.1-3p	0	1
mir-4922.2-3p	0	1
mir-4923.1-3p	0	1
mir-4923.2-3p	-0.295578	0.761304
mir-4924-5p	0	1
mir-4925-3p	0	1
mir-4926-5p	0	1
mir-4927-5p	0	1
mir-4929-3p	0	1
mir-4930-5p	0	1
mir-4931-3p	0	1
mir-4932-5p	0	1
mir-4933-5p	0	1
mir-4934-3p	0	1
mir-4935-5p	0	1
mir-4936-3p	0.229033	0.740149
mir-43-3p	0.786448	0.114819
mir-4938-5p	0	1
mir-37-5p	-1.0652	0.120834
mir-50-5p	0.645978	0.126998
mir-57-3p	3.37452	0.126998
mir-789.2-5p	1.46359	0.128622
mir-51-3p	0.029675	0.786637
mir-90-5p	1.63207	0.133444
mir-53-3p	0	1
mir-43-5p	1.39226	0.13371
mir-254-3p	1.12993	0.136939
mir-5546-3p	1.94673	0.138112
mir-5545-3p	0	1
mir-5545-5p	0	1
mir-5546-5p	0	1
mir-5547-3p	0	1
mir-5547-5p	0	1
mir-5548-3p	0	1
mir-5548-5p	0	1
mir-81-5p	1.96066	0.142602
mir-5549-5p	0	1
mir-5550-3p	0	1
mir-5550-5p	0	1
mir-5551-3p	0	1
mir-791-5p	3.06096	0.150466
mir-5552-3p	0	1
mir-5552-5p	0	1
mir-5553-3p	0	1
mir-5553-5p	0	1
mir-61-5p	-0.831351	0.153632
mir-788-5p	2.70349	0.17413
mir-54-3p	0.566402	0.179651
mir-5592.2-5p	0	1
mir-5593.1-3p	0	1
mir-5593.1-5p	0	1
mir-5593.2-3p	0	1
mir-5593.2-5p	0	1
mir-5594-3p	0	1
mir-5594-5p	0	1
mir-5595-3p	0	1
mir-5595-5p	0	1
mir-60-5p	1.53089	0.190528
mir-56-5p	0.0359613	0.909296
mir-1829.3-5p	-0.58806	0.195866
mir-64-3p	-1.04603	0.220569
mir-4937-5p	-2.47629	0.22948
mir-58.2-3p	0	1
mir-58.2-5p	0	1
miR58Synth	0	1
mir-59-5p	0	1
mir-5551-5p	1.35796	0.234052
mir-61-3p	-0.136053	0.770288
mir-246-5p	-2.92485	0.237422
mir-62-3p	0.349814	0.694409
mir-50-3p	2.86963	0.242504
mir-63-5p	-0.135787	0.81538
mir-65-3p	0.303647	0.81346
mir-66-3p	-0.476558	0.587233
mir-44-5p	0.550623	0.259944
mir-796-5p	2.20509	0.263542
mir-71-3p	-0.393547	0.589547
mir-72-3p	0.228157	0.732021
mir-49-5p	0.899811	0.277752
mir-1820-5p	0.802113	0.278274
mir-251-5p	1.43168	0.295546
mir-74-5p	0.359397	0.720703
mir-55-5p	1.65015	0.297211
mir-75-5p	-0.0280712	0.798788
mir-1822-3p	0.936871	0.29812
mir-76-5p	0	1
mir-1018-3p	2.01175	0.318939
mir-1829.2-3p	-1.84719	0.340824
mir-78-3p	0	1
mir-784-3p	0	1
mir-784-5p	0	1
mir-785-3p	0	1
mir-785-5p	0	1
mir-4807-3p	0.689018	0.345479
mir-786-5p	0	1
mir-787-3p	0.2353	0.716051
mir-787-5p	0	1
mir-788-3p	0.0834258	0.95621
mir-1830-3p	1.40876	0.347816
mir-789.1-5p	0	1
mir-228-3p	1.3584	0.362111
mir-1822-5p	2.04251	0.372195
mir-790-5p	0	1
mir-791-3p	0.310706	0.700987
mir-2209.1-3p	0.674106	0.378167
mir-792-3p	0	1
mir-792-5p	0	1
mir-793-3p	0.391147	0.81111
mir-794-3p	0	1
mir-794-5p	-0.32797	0.760158
mir-795-3p	0	1
mir-52-3p	0.64639	0.3978
mir-70-5p	-1.44526	0.398152
mir-86-3p	0.564999	0.41295
mir-797-3p	0	1
mir-797-5p	-0.315011	0.81371
mir-798-3p	0.423464	0.686053
mir-799-3p	0	1
mir-800-3p	0	1
mir-800-5p	0	1
mir-4916-3p	0.547837	0.419664
mir-789.1-3p	-1.21421	0.424723
mir-249-3p	-1.5814	0.462188
mir-8186.1-3p	0	1
mir-8186.1-5p	0	1
mir-8186.2-3p	0	1
mir-8186.2-5p	0	1
mir-8187-3p	0	1
mir-8187-5p	0	1
mir-8188-3p	0	1
mir-8188-5p	0	1
mir-8189-3p	0	1
mir-8189-5p	0	1
mir-73-5p	0.668132	0.479222
mir-8190-5p	0	1
mir-8191-3p	0	1
mir-236-5p	1.21527	0.525854
mir-8192-3p	0	1
mir-8192-5p	0	1
mir-8193-3p	0	1
mir-8193-5p	0	1
mir-8194-3p	0	1
mir-8194-5p	0	1
mir-8195-3p	0	1
mir-8195-5p	0	1
mir-359-3p	-0.909695	0.587581
mir-8196.1-5p	0	1
mir-8196.2-3p	0.478729	0.877954
mir-8196.2-5p	0	1
mir-8197-3p	0	1
mir-8197-5p	0	1
mir-8198-5p	0	1
mir-8200-3p	0	1
mir-8200-5p	0	1
mir-8201-3p	0	1
mir-8201-5p	0	1
mir-8202-3p	0	1
mir-8203-3p	0	1
mir-8203-5p	0	1
mir-8204-3p	0	1
mir-8204-5p	0	1
mir-8205-3p	0	1
mir-8205-5p	0	1
mir-8206-3p	0	1
mir-8206-5p	0	1
mir-8207-3p	0	1
mir-8207-5p	0	1
mir-8208-3p	0	1
mir-8208-5p	0	1
mir-8209-3p	0	1
mir-8209-5p	0	1
mir-8210-3p	0	1
mir-8210-5p	0	1
mir-8211-3p	0	1
mir-8211-5p	0	1
mir-8212-3p	0	1
mir-8212-5p	0	1
mir-82-5p	0	1
mir-83-5p	-0.210225	0.760447
mir-84-3p	0	1
mir-243-5p	-0.735424	0.622603
mir-1829.1-5p	-0.851347	0.638897
mir-85-5p	0	1
mir-2209.3-3p	-0.79127	0.639208
mir-8190-3p	-1.19705	0.650841
mir-789.2-3p	-0.768131	0.697187
mir-233-5p	0.738233	0.749159
mir-8196.1-3p	0.601531	0.756994
mir-255-3p	0.733556	0.791716
