# Supplementary material for: Soma-to-Germline miRNA inheritance via Yolk Promotes Stress Resilience in Progeny
Source: Research Square preprint supplement (doi:10.21203/rs.3.rs-4711258/v1), 2025-07-09
Supplement: Supplementary file 5 [file ab2c5b68eaa9f5e144c7fc9e.xlsx]

## Sheet: miRNA enriched in yolk
Supplementary Table 2. miRNAs enriched in yolk (highlighted in green)
gene_name	cosmid	type	gene_id	Sorted_GFP_YOLK_Rep1	Sorted_GFP_YOLK_Rep2	Sorted_GFP_YOLK_Rep3	Total_worm_lysate_Rep1	Total_worm_lysate_Rep2	Total_worm_lysate_Rep3	unsorted_fraction_rep1	unsorted_fraction_rep2	unsorted_fraction_rep3	Sorted_GFP_YOLK_mean	Total_worm_lysate_mean	Unsorted_fraction_mean	idx	logFC_Sorted_GFP_Yolk_vs_Unsorted_Fraction	FDR_Sorted_GFP_Yolk_vs_Unsorted_Fraction	FDR(-log10)_Sorted_GFP_Yolk_vs_Unsorted_Fraction
mir-252-5p	W02B12.14a	miRNA	WBGene00003346	385.419	293.705	219.579	7.83574	12.9495	9.36666	20.7925	82.7466	42.8579	299.567	10.0506	48.799	5532	2.77259	1.42494e-15	14.8462
mir-75-3p	T24D8.8b	miRNA	WBGene00003303	257.672	142.077	138.073	27.9571	35.3887	33.4019	46.3617	29.5524	14.286	179.274	32.2492	30.0667	5347	2.61328	3.8211e-23	22.4178
mir-356.2-3p	ZK652.13b	miRNA	WBGene00195236	26.4209	21.0926	12.7733	3.77276	5.04141	3.18113	5.61959	7.52242	0	20.0956	3.99843	4.38067	15792	2.36128	0.000153329	3.81438
mir-239.2-5p	C34E11.6a	miRNA	WBGene00003333	14.1638	5.96961	7.29901	4.6434	2.66898	2.47421	2.52882	1.61195	1.94809	9.14414	3.2622	2.02962	1403	2.15493	0.0147277	1.83187
mir-46-5p	ZK525.3a	miRNA	WBGene00003274	179.226	119.79	57.7838	97.9951	64.3521	47.8937	42.9899	37.0748	15.5847	118.933	70.0803	31.8831	15696	1.88876	8.16329e-13	12.0881
mir-232-3p	F13H10.7b	miRNA	WBGene00003325	126.112	70.0434	79.0726	5.61077	9.68742	7.06917	33.7176	30.627	12.9873	91.7428	7.45579	25.7773	2496	1.85226	7.34419e-09	8.13406
mir-236-3p	C52E12.7b	miRNA	WBGene00003329	208.371	159.19	101.578	13.9302	34.4991	44.3591	61.8155	53.7316	24.0264	156.38	30.9294	46.5245	2094	1.77648	2.27418e-13	12.6432
mir-250-3p	F55A11.12b	miRNA	WBGene00003344	523.516	252.315	201.331	92.5778	119.61	108.512	145.267	83.2839	59.092	325.721	106.9	95.8808	3228	1.74263	5.32366e-18	17.2738
mir-124-3p	C29E6.7b	miRNA	WBGene00003319	54.4761	48.9508	24.33	18.8638	7.7104	6.71572	27.536	8.59705	7.79235	42.5856	11.0966	14.6418	1275	1.64137	0.000150836	3.82149
mir-259-5p	F25D1.6a	miRNA	WBGene00003353	160.977	96.7076	97.9284	24.1844	28.3703	16.966	54.791	31.7016	32.4681	118.538	23.1736	39.6536	2576	1.58323	2.80458e-10	9.55213
mir-40-3p	Y62F5A.7b	miRNA	WBGene00003268	3289.27	4266.68	1846.04	551.5	523.318	410.366	1054.8	2103.59	518.192	3134	495.061	1225.53	13280	1.49612	1.90453e-13	12.7202
mir-83-3p	C06A6.6b	miRNA	WBGene00003311	25.8762	40.9913	24.33	9.77049	12.2576	8.30628	15.7349	13.4329	4.54554	30.3992	10.1114	11.2378	590	1.45341	0.00247366	2.60666
mir-241-5p	F56A12.4a	miRNA	WBGene00003335	771.654	297.684	225.053	78.7443	68.3062	44.1823	200.339	160.657	83.1184	431.464	63.7443	148.038	3368	1.43195	2.65594e-09	8.57578
mir-795-5p	F33E2.9a	miRNA	WBGene00045329	104.049	58.5022	38.9281	27.4734	27.5795	22.4446	43.5519	20.418	13.6366	67.1599	25.8325	25.8688	2729	1.40793	7.3928e-06	5.13119
mir-77-5p	T21B4.13a	miRNA	WBGene00003305	16.6152	16.7149	7.90726	9.09332	17.1013	21.3843	7.30547	6.98511	1.94809	13.7458	15.8596	5.41289	5195	1.38376	0.0380508	1.41964
mir-60-3p	C32D5.13b	miRNA	WBGene00003288	329.308	459.262	288.311	123.921	125.541	94.7269	204.272	147.762	79.8716	358.96	114.73	143.969	1383	1.37665	8.01998e-08	7.09583
mir-241-3p	F56A12.4b	miRNA	WBGene00003335	27.5104	22.6845	10.3403	4.83687	5.93107	6.53899	12.9251	10.209	1.94809	20.1784	5.76898	8.36072	3369	1.35665	0.0161762	1.79112
lin-4-5p	F59G1.6a	miRNA	WBGene00002993	3128.84	2369.54	2100.9	602.191	675.648	334.725	999.164	1193.92	844.172	2533.09	537.521	1012.42	3466	1.31768	4.92839e-12	11.3073
mir-47-5p	K02B9.5a	miRNA	WBGene00003275	136.735	74.4211	59.6086	55.8175	52.3911	47.1867	44.3948	36.5375	25.3252	90.2549	51.7985	35.4191	4202	1.31419	5.4334e-06	5.26493
mir-77-3p	T21B4.13b	miRNA	WBGene00003305	3013.62	2900.83	2091.78	731.722	1116.52	757.109	1267.78	1350.27	707.156	2668.74	868.452	1108.4	5196	1.30396	2.52863e-13	12.5971
mir-49-3p	F19C6.6b	miRNA	WBGene00003277	428.182	315.593	207.414	130.983	143.235	113.814	144.986	157.434	83.1184	317.063	129.344	128.512	2526	1.29803	1.25837e-09	8.90019
mir-248-3p	AH9.5b	miRNA	WBGene00003342	55.0209	44.5731	27.3713	23.1203	25.899	11.3107	20.5115	24.7165	8.44172	42.3218	20.11	17.8899	86	1.28509	0.000942472	3.02573
mir-38-3p	Y62F5A.5b	miRNA	WBGene00003266	1215.91	1423.15	668.468	323.684	273.324	380.498	500.987	718.929	251.303	1102.51	325.835	490.406	13276	1.22175	2.49297e-11	10.6033
mir-58.1-5p	Y67D8A.4a	miRNA	WBGene00003286	34.5923	46.9609	23.7218	14.7041	20.0668	14.8453	10.1153	33.3136	8.44172	35.0917	16.5387	17.2902	13974	1.2151	0.00699621	2.15514
mir-242-5p	F36A4.16a	miRNA	WBGene00003336	66.7333	47.7569	29.1961	18.2834	13.2461	17.8497	27.817	19.3434	14.286	47.8954	16.4597	20.4821	2765	1.21453	0.00067198	3.17264
mir-76-3p	C44B11.5b	miRNA	WBGene00003304	105.684	62.8799	46.2271	129.145	72.1614	60.7949	55.353	21.4926	21.429	71.5969	87.3669	32.7582	1630	1.17716	0.000189153	3.72319
mir-228-5p	T12E12.7a	miRNA	WBGene00003321	2834.94	1420.37	949.48	1912.89	1396.08	1341.55	1292.51	671.107	387.02	1734.93	1550.17	783.545	5107	1.16812	8.39088e-12	11.0762
mir-57-5p	T09A5.13a	miRNA	WBGene00003285	1096.33	719.935	602.777	284.408	325.715	425.034	448.163	406.211	237.017	806.348	345.052	363.797	5041	1.15305	3.86576e-09	8.41276
mir-67-3p	EGAP1.2b	miRNA	WBGene00003295	95.878	66.0637	52.9178	14.8976	10.1817	19.4402	45.2377	38.1494	16.2341	71.6198	14.8398	33.2071	2227	1.14891	0.000342333	3.46555
mir-74-3p	T24D8.7b	miRNA	WBGene00003302	93.9713	78.4008	46.8353	29.9886	28.2714	26.6861	47.7665	44.5972	12.9873	73.0692	28.3154	35.117	5345	1.13748	0.000500458	3.30063
mir-72-5p	F53G2.9a	miRNA	WBGene00003300	3807.06	2283.57	1501.77	812.692	812.26	478.76	1354.04	1488.9	611.05	2530.8	701.237	1151.33	3214	1.13604	1.33187e-07	6.87554
mir-41-3p	Y62F5A.8b	miRNA	WBGene00003269	19.339	29.848	9.73202	11.2215	2.27358	3.18113	12.0821	8.59705	5.1949	19.6397	5.55875	8.62469	13282	1.12559	0.0498496	1.30234
mir-235-3p	T09B4.12b	miRNA	WBGene00003328	2485.2	1252.42	824.788	1089.07	793.281	446.065	949.149	749.556	370.137	1520.8	776.139	689.614	5046	1.09607	3.1943e-08	7.49562
mir-240-3p	C39D10.10b	miRNA	WBGene00003334	151.988	104.667	62.0416	41.7906	41.8141	36.4063	62.0965	56.9555	29.2213	106.232	40.0036	49.4244	1525	1.09255	5.47144e-05	4.2619
mir-63-3p	C16H3.5b	miRNA	WBGene00003291	246.232	158.792	175.785	115.698	88.4718	75.11	130.375	97.2542	55.8452	193.603	93.0933	94.4913	1052	1.07153	3.464e-05	4.46042
mir-58.1-3p	Y67D8A.4b	miRNA	WBGene00003286	32358.5	21421.3	14790.8	11398.6	13143	14990.7	17548	10419.6	6081.93	22856.9	13177.4	11349.9	13975	1.06795	9.58822e-10	9.01826
mir-42-3p	ZK930.8b	miRNA	WBGene00003270	248.684	505.825	265.197	95.2864	146.794	111.87	138.242	271.882	94.807	339.902	117.983	168.31	15813	1.06043	1.59729e-06	5.79662
mir-233-3p	W03G11.5b	miRNA	WBGene00003326	114.4	80.3907	68.1241	77.4867	56.3452	48.6006	57.0389	37.6121	32.4681	87.6382	60.8108	42.373	5602	1.05297	0.00015653	3.8054
mir-786-3p	C39D10.12b	miRNA	WBGene00045343	385.691	341.064	212.28	174.031	137.7	80.0584	216.073	167.643	84.4172	313.011	130.596	156.044	1527	1.04969	8.08637e-07	6.09225
mir-71-5p	F16A11.4a	miRNA	WBGene00003299	8037.68	4464.87	4301.55	5195.48	4762.75	3585.66	4061	2616.73	1727.95	5601.37	4514.63	2801.89	2509	1.02315	3.8535e-08	7.41414
mir-85-3p	F49E12.11b	miRNA	WBGene00003313	838.115	491.1	532.828	879.924	625.827	611.66	634.733	267.046	157.795	620.681	705.804	353.191	3061	0.996614	0.000221319	3.65498
mir-1-3p	T09B4.11b	miRNA	WBGene00003260	3856.09	2049.57	1280.37	5158.14	2671.26	1576.96	2202.6	989.198	607.804	2395.34	3135.45	1266.53	5044	0.97637	2.82981e-08	7.54824
mir-355-5p	T27D12.5a	miRNA	WBGene00014534	55.2933	31.042	30.4126	11.415	21.5496	31.4578	27.536	19.3434	12.9873	38.9159	21.4741	19.9555	5360	0.960779	0.0158252	1.80065
let-7-5p	C05G5.6a	miRNA	WBGene00002285	2583.26	1069.36	957.387	609.736	651.627	631.808	1064.07	757.615	450.008	1536.67	631.057	757.231	579	0.956744	7.56927e-06	5.12095
mir-59-3p	B0035.17b	miRNA	WBGene00003287	278.918	166.751	109.485	115.698	106.562	120.529	151.167	84.8959	53.8971	185.051	114.263	96.6534	91	0.954011	2.8454e-05	4.54586
mir-245-3p	F55D12.7b	miRNA	WBGene00003339	363.356	185.854	114.351	152.555	124.948	99.1452	172.803	91.881	69.4818	221.187	125.549	111.388	3358	0.949146	2.68423e-05	4.57118
mir-230-3p	F46G11.5b	miRNA	WBGene00003323	68.0952	49.7467	29.1961	25.6354	24.7128	24.2119	43.5519	26.3285	10.3898	49.0126	24.8534	26.7567	3045	0.946669	0.0125845	1.90016
mir-243-3p	R08C7.14b	miRNA	WBGene00003337	32.1409	32.2359	21.2888	22.1529	33.1152	22.4446	15.4539	22.0299	8.44172	28.5552	25.9042	15.3085	4764	0.946237	0.0391335	1.40745
mir-64-5p	Y48G9A.13a	miRNA	WBGene00003292	6376.7	4398.41	3278.47	2403.73	2030.21	1960.46	3408	2686.58	1435.09	4684.53	2131.47	2509.89	10639	0.934768	4.04747e-07	6.39282
mir-80-3p	K01F9.3b	miRNA	WBGene00003308	33922	18546.8	14496.4	10686.2	11022.2	6575.39	18884.4	11420.1	6068.3	22321.7	9427.93	12124.3	4153	0.933139	8.31426e-07	6.08018
mir-66-5p	Y48G9A.15a	miRNA	WBGene00003294	4429.45	3160.71	2012.7	1571.6	1722.19	1304.26	2123.93	1974.64	991.577	3200.95	1532.68	1696.71	10643	0.920019	4.25101e-07	6.37151
mir-65-5p	Y48G9A.14a	miRNA	WBGene00003293	5325.59	3411.43	2832.02	1016.03	1322.33	1301.61	2842.11	2292.19	1244.18	3856.34	1213.33	2126.16	10641	0.887941	5.4334e-06	5.26493
mir-82-3p	T07D1.7b	miRNA	WBGene00003310	12722.9	7644.28	6151.24	9392.63	6548.6	5828.53	7859.28	4639.72	2589.01	8839.47	7256.59	5029.34	4972	0.886776	5.4334e-06	5.26493
mir-86-5p	Y56A3A.34a	miRNA	WBGene00003314	334.483	247.54	292.569	315.654	241.296	252.723	285.756	111.224	118.184	291.531	269.891	171.722	11712	0.882415	0.00114804	2.94004
mir-47-3p	K02B9.5b	miRNA	WBGene00003275	604.14	432.598	359.476	120.825	146.003	124.594	350.663	245.016	177.925	465.405	130.474	257.868	4203	0.869348	7.6769e-06	5.11481
mir-34-5p	Y41G9A.7a	miRNA	WBGene00003262	387.053	281.765	156.321	100.123	173.088	104.624	227.875	178.389	66.8844	275.046	125.945	157.716	10280	0.863067	0.00015653	3.8054
mir-231-3p	R13A5.14b	miRNA	WBGene00003324	115.762	85.9623	43.1858	28.3441	43.7911	30.7509	60.1297	51.045	23.3771	81.6366	34.2954	44.8506	4795	0.86204	0.00364179	2.43868
mir-234-3p	C13B4.3b	miRNA	WBGene00003327	166.425	99.8914	104.619	92.0941	63.8579	70.6917	128.97	55.3435	37.663	123.645	75.5479	73.9921	1033	0.858072	0.00457427	2.33968
mir-46-3p	ZK525.3b	miRNA	WBGene00003274	473.125	421.852	321.765	112.602	119.907	121.06	325.094	222.449	149.353	405.581	117.856	232.299	15697	0.848659	0.000119142	3.92393
mir-81-3p	T07D1.6b	miRNA	WBGene00003309	13276.4	5923.84	4708.47	8545.79	5333.12	5208.21	7706.43	3793.45	2200.69	7969.56	6362.38	4566.86	4970	0.841004	5.4334e-06	5.26493
mir-244-5p	T04D1.5a	miRNA	WBGene00003338	43.8533	27.0622	25.5465	30.8593	31.9289	27.5698	29.5029	12.8956	13.6366	32.154	30.1193	18.6784	4836	0.821169	0.0586829	1.23149
mir-70-3p	T10H9.7b	miRNA	WBGene00003298	2762.76	3477.5	2071.09	1805.12	2408.31	2109.97	2336.91	1769.92	904.562	2770.45	2107.8	1670.46	5056	0.803067	0.000653155	3.18498
mir-56-3p	F09A5.8b	miRNA	WBGene00003284	6798.08	5272.76	3031.52	1660.6	1650.42	1235.69	3908.15	3183.06	1648.08	5034.12	1515.57	2913.1	2319	0.80173	3.07071e-06	5.51276
lin-58-5p	F56A12.3a	miRNA	WBGene00003039	6278.65	2297.5	2391.64	2197.78	2053.93	1521.99	3332.14	1875.77	1237.69	3655.93	1924.57	2148.53	3366	0.719661	0.000792338	3.10109
mir-237-5p	F22F1.4a	miRNA	WBGene00003330	1313.69	960.709	867.974	1121.28	722.899	770.54	1062.67	563.644	408.449	1047.46	871.574	678.253	2549	0.716423	0.00133782	2.8736
mir-53-5p	F36H1.8a	miRNA	WBGene00003281	564.1	479.16	283.445	287.697	221.723	203.239	429.618	326.151	125.976	442.235	237.553	293.915	2821	0.690447	0.00563266	2.24929
mir-51-5p	F36H1.7a	miRNA	WBGene00003279	7152.72	8175.18	4673.19	2277.88	2387.95	1715.34	4933.72	5914.77	2232.51	6667.03	2127.05	4360.33	2819	0.688117	0.000942472	3.02573
mir-2-3p	M04C9.7b	miRNA	WBGene00003261	125.023	106.259	88.1964	57.2686	78.389	106.214	87.6657	57.4928	55.8452	106.493	80.624	67.0012	4485	0.679514	0.0147277	1.83187
mir-35-3p	Y62F5A.2b	miRNA	WBGene00003263	5543.22	5038.35	3044.9	1814.31	3383.28	3314.56	3616.21	3693.51	1566.26	4542.16	2837.38	2958.66	13270	0.673287	0.00067198	3.17264
mir-44-3p	ZK930.10b	miRNA	WBGene00003272	703.559	679.739	725.035	787.733	666.356	719.819	815.122	376.121	293.512	702.778	724.636	494.918	15809	0.646098	0.0372093	1.42935
mir-45-3p	ZK930.11b	miRNA	WBGene00003273	732.976	668.198	686.715	783.283	690.575	731.66	836.196	351.405	297.408	695.963	735.173	495.003	15811	0.645967	0.0323715	1.48984
mir-55-3p	F09A5.6b	miRNA	WBGene00003283	7765.84	5312.55	3625.18	3575.71	2902.86	2434.98	5861.52	3358.22	1983.15	5567.86	2971.18	3734.3	2317	0.645137	0.000942472	3.02573
mir-253-3p	F44E7.11b	miRNA	WBGene00003347	227.165	94.3198	74.2066	96.931	108.242	88.3647	129.532	76.8362	42.2086	131.897	97.8459	82.8588	2984	0.638956	0.0213614	1.67037
mir-79-3p	C12C8.4b	miRNA	WBGene00003307	1498.09	913.35	723.819	269.414	358.336	500.851	1022.2	544.838	471.437	1045.09	376.2	679.493	1030	0.637782	0.000790795	3.10194
mir-36-3p	Y62F5A.3b	miRNA	WBGene00003264	1336.03	1627.32	982.325	1307.12	1030.52	1127.53	1173.37	1016.06	480.529	1315.22	1155.06	889.988	13272	0.629051	0.00780034	2.10789
mir-52-5p	Y37A1B.16a	miRNA	WBGene00003280	8118.58	7062.44	4142.19	4477.01	3279.78	2971.7	6619.6	5149.1	2037.05	6441.07	3576.17	4601.92	9282	0.589611	0.00921702	2.03541
mir-73-3p	T24D8.9b	miRNA	WBGene00003301	817.687	680.137	410.569	350.964	537.454	476.462	644.005	500.241	204.549	636.131	454.96	449.599	5349	0.587911	0.0139985	1.85392
mir-246-3p	ZK593.10b	miRNA	WBGene00003340	153.623	127.352	98.5367	152.362	143.927	135.728	137.961	82.2093	47.4035	126.504	144.006	89.1913	15733	0.583681	0.0498496	1.30234
mir-84-5p	B0395.4a	miRNA	WBGene00003312	242.964	116.208	104.011	135.239	155.691	97.3779	163.811	89.7317	59.092	154.394	129.436	104.212	278	0.576763	0.0266672	1.57402
mir-239.1-5p	C34E11.5a	miRNA	WBGene00003332	222.535	156.006	169.094	44.4025	104.683	200.058	182.075	123.583	77.2742	182.545	116.381	127.644	1401	0.565337	0.0446335	1.35034
mir-238-3p	K01F9.5b	miRNA	WBGene00003331	1592.88	1595.48	891.696	1072.92	1101.2	738.906	1284.92	1048.84	527.932	1360.02	971.008	953.898	4155	0.554484	0.00765959	2.11579
mir-80-5p	K01F9.3a	miRNA	WBGene00003308	141.366	133.321	71.1654	87.8376	123.465	91.5458	123.631	97.2542	33.7669	115.284	100.95	84.884	4152	0.531263	0.0891407	1.04992
mir-90-3p	K01F9.1b	miRNA	WBGene00003318	6457.33	5388.57	6608.04	1013.81	1206.08	987.564	5224.54	4388.26	3459.16	6151.31	1069.15	4357.32	4151	0.510754	0.0231535	1.63538
mir-37-3p	Y62F5A.4b	miRNA	WBGene00003265	3643.91	3608.43	2016.35	778.06	1224.17	1526.23	2496.79	3095.48	1196.13	3089.56	1176.16	2262.8	13274	0.505657	0.0161762	1.79112
F39B1.3-5p	F39B1.3a	miRNA	WBGene00189969	0	0	0	0	0	0	0	0	0	0	0	0	2933	0	1	0
let-7-3p	C05G5.6b	miRNA	WBGene00002285	0	0	0	0.870637	0.0988512	0.353459	0	0	0	0	0.440982	0	580	0	1	0
lin-4-3p	F59G1.6b	miRNA	WBGene00002993	0.272381	0	0	0.0967375	0	0	0	0	0	0.0907935	0.0322458	0	3467	0.704946	1	0
lin-58-3p	F56A12.3b	miRNA	WBGene00003039	8.4438	9.55137	7.29901	6.09446	5.33797	3.71132	4.77665	3.76121	3.24681	8.43139	5.04791	3.92823	3367	1.0894	0.188246	0.725274
lsy-6-3p	C32C4.6b	miRNA	WBGene00003088	1.08952	0.397974	1.2165	0.677162	0.691959	0.706917	1.4049	0.537316	1.29873	0.901333	0.692013	1.08031	1381	-0.29184	1	0
lsy-6-5p	C32C4.6a	miRNA	WBGene00003088	0	0	0	0	0	0	0	0	0	0	0	0	1380	0	1	0
mir-1018-3p	Y59E1B.3b	miRNA	WBGene00050924	0	0	1.2165	0.193475	0.691959	0.353459	0.28098	0	0	0.405501	0.412964	0.0936599	13228	-0.0260795	1	0
mir-1019-3p	M04C9.8b	miRNA	WBGene00050921	0	0	0	0	0	0	0	0	0	0	0	0	4487	0	1	0
mir-1019-5p	M04C9.8a	miRNA	WBGene00050921	0	0	0	0	0.197702	0	0	0	0	0	0.0659008	0	4486	0	1	0
mir-1020-3p	T16G12.11b	miRNA	WBGene00050922	4.63047	5.96961	3.04126	1.5478	5.23911	1.59056	4.49568	5.91047	2.59745	4.54711	2.79249	4.33453	5169	0.078215	1	0
mir-1020-5p	T16G12.11a	miRNA	WBGene00050922	0.272381	0	0	0.193475	0.494256	0.353459	0.28098	0	0.649363	0.0907935	0.347063	0.310114	5168	-1.03642	1	0
mir-1021-5p	Y51H4A.402a	miRNA	WBGene00050923	0	0	0	0	0	0	0	0	0	0	0	0	11116	0	1	0
mir-1022-3p	K10C2.9b	miRNA	WBGene00077721	0	0	0	0	0	0	0	0	0	0	0	0	4282	0	1	0
mir-1022-5p	K10C2.9a	miRNA	WBGene00077721	4.35809	3.58176	1.2165	3.77276	3.36094	3.53459	3.09078	1.61195	0.649363	3.05212	3.5561	1.78403	4281	0.806694	1	0
mir-124-5p	C29E6.7a	miRNA	WBGene00003319	1.3619	2.78582	0	1.74127	1.28507	0.353459	1.4049	0	0	1.38257	1.1266	0.468299	1274	1.37574	1	0
mir-1-5p	T09B4.11a	miRNA	WBGene00003260	0	0.397974	0	0.38695	0.494256	0.176729	0.561959	0	0	0.132658	0.352645	0.18732	5043	-0.382054	1	0
mir-1817-5p	Y37F4.9a	miRNA	WBGene00077708	1.63428	1.19392	1.82475	2.03149	1.77932	1.23711	2.52882	1.61195	2.59745	1.55099	1.68264	2.24607	9529	-0.533396	1	0
mir-1818-5p	Y71A12B.20a	miRNA	WBGene00077715	0	0	0	0	0	0	0	0	0	0	0	0	13979	0	1	0
mir-1819-3p	R11.5b	miRNA	WBGene00077716	2.99619	3.58176	0.608251	1.06411	0.988512	0.706917	1.4049	0.537316	0	2.3954	0.919847	0.647405	4782	1.8812	1	0
mir-1819-5p	R11.5a	miRNA	WBGene00077716	0	0	0	0	0	0	0	0	0	0	0	0	4781	0	1	0
mir-1820-3p	C46A5.10b	miRNA	WBGene00077726	0	0	0	0.0967375	0	0	0	0	0	0	0.0322458	0	1689	0	1	0
mir-1820-5p	C46A5.10a	miRNA	WBGene00077726	18.2495	5.96961	4.25776	4.83687	6.32648	4.77169	9.83429	9.13437	1.29873	9.49229	5.31168	6.75579	1688	0.499126	0.566882	0.246507
mir-1821-3p	F59D6.9b	miRNA	WBGene00077727	1.63428	0	0	0.38695	0.593107	0.706917	0.842939	0	0.649363	0.544761	0.562325	0.497434	3463	-0.501506	1	0
mir-1821-5p	F59D6.9a	miRNA	WBGene00077727	0	0	0	0	0	0	0	0	0	0	0	0	3462	0	1	0
mir-1822-3p	ZK84.8b	miRNA	WBGene00077709	25.3314	13.1331	10.9485	20.7986	17.8921	16.6126	28.9409	19.3434	5.84427	16.471	18.4344	18.0428	15800	-0.0571481	0.934116	0.029599
mir-1822-5p	ZK84.8a	miRNA	WBGene00077709	0.272381	0	0	0.193475	0.0988512	0	0	0	0	0.0907935	0.0974421	0	15799	0.704946	1	0
mir-1823-3p	T07D10.9b	miRNA	WBGene00077717	0.544761	0.795948	0	0.0967375	0.296554	0.530188	0.561959	1.07463	0	0.446903	0.307826	0.54553	4968	-0.204207	1	0
mir-1823-5p	T07D10.9a	miRNA	WBGene00077717	0	0	0	0	0	0	0	0	0	0	0	0	4967	0	1	0
mir-1824-3p	Y87G2A.21b	miRNA	WBGene00077718	0	0	0	0	0	0	0	0	0	0	0	0	15540	0	1	0
mir-1824-5p	Y87G2A.21a	miRNA	WBGene00077718	0.544761	0	0	0.967375	0.593107	1.06038	0.561959	0.537316	0	0.181587	0.873619	0.366425	15539	-1.01396	1	0
mir-1828-3p	T22A3.9b	miRNA	WBGene00077719	0	0	0	0	0	0	0	0	0	0	0	0	5201	0	1	0
mir-1829.1-3p	K09A9.7b	miRNA	WBGene00077705	2.17905	2.78582	1.82475	2.03149	2.07588	1.23711	1.68588	0.537316	1.29873	2.26321	1.78149	1.17397	4269	0.971778	1	0
mir-1829.1-5p	K09A9.7a	miRNA	WBGene00077705	3.26857	1.19392	0	0.580425	0.395405	0.353459	0.561959	0.537316	1.29873	1.4875	0.443096	0.799334	4268	0.630651	1	0
mir-1829.2-3p	F20D1.11b	miRNA	WBGene00077706	0.272381	0.397974	0	0.290212	0.79081	0.176729	0	0	0	0.223451	0.419251	0	2533	1.48227	1	0
mir-1829.2-5p	F20D1.11a	miRNA	WBGene00077706	32.4133	18.3068	20.6805	15.6715	25.9979	24.2119	28.6599	9.67168	10.3898	23.8002	21.9604	16.2405	2532	0.636633	0.219613	0.658343
mir-1829.3-3p	F39B1.2b	miRNA	WBGene00077707	0.544761	0	0	0.193475	0.691959	0.176729	0.28098	0	0	0.181587	0.354054	0.0936599	2932	0.168245	1	0
mir-1829.3-5p	F39B1.2a	miRNA	WBGene00077707	25.8762	15.123	4.86601	12.0922	12.0598	7.95282	10.6772	6.44779	3.89618	15.2884	10.7016	7.00707	2931	1.05343	0.107042	0.970447
mir-1830-3p	B0286.7b	miRNA	WBGene00077723	0.544761	0.397974	0	5.22382	2.47128	2.47421	0	0	0	0.314245	3.38977	0	210	1.86278	1	0
mir-1830-5p	B0286.7a	miRNA	WBGene00077723	0	0.397974	0	0.38695	0.197702	0.530188	0.28098	0	0	0.132658	0.371613	0.0936599	209	-0.198436	1	0
mir-1832.1-3p	C18D11.11b	miRNA	WBGene00077725	0.272381	0.397974	0	0.0967375	0.494256	0	0	0	0	0.223451	0.196998	0	1082	1.48227	1	0
mir-1832.1-5p	C18D11.11a	miRNA	WBGene00077725	0	0.397974	0	0.38695	0.197702	0.706917	0	0	0	0.132658	0.430523	0	1081	0.678891	1	0
mir-1832.2-3p	Y116A8C.464b	miRNA	WBGene00194802	0	0	0	0	0	0	0	0	0	0	0	0	8928	0	1	0
mir-1832.2-5p	Y116A8C.464a	miRNA	WBGene00194802	0.272381	0	0	0	0.0988512	0	0	0	0	0.0907935	0.0329504	0	8927	0.704946	1	0
mir-1833-3p	Y41E3.214b	miRNA	WBGene00077720	0	0	0	0	0	0	0	0	0	0	0	0	9957	0	1	0
mir-2207-3p	F07A11.8b	miRNA	WBGene00194804	0	0	0	0	0	0	0	0	0	0	0	0	2305	0	1	0
mir-2207-5p	F07A11.8a	miRNA	WBGene00194804	0	0	0	0	0	0	0	0	0	0	0	0	2304	0	1	0
mir-2208.1-3p	Y55F3AM.16b	miRNA	WBGene00194822	0	0.397974	0	0.0967375	0	0	0	0	0	0.132658	0.0322458	0	11702	0.678891	1	0
mir-2208.1-5p	Y55F3AM.16a	miRNA	WBGene00194822	0	0.397974	0	0.0967375	0.296554	0.176729	0	0	0	0.132658	0.190007	0	11701	0.678891	1	0
mir-2208.2-3p	Y55F3AM.17b	miRNA	WBGene00194823	0	0	0	0.0967375	0.197702	0	0	0	0	0	0.0981466	0	11704	0	1	0
mir-2208.2-5p	Y55F3AM.17a	miRNA	WBGene00194823	1.08952	0	0	0.290212	0.0988512	0	0	0	0	0.363174	0.129688	0	11703	1.28785	1	0
mir-2209.1-3p	Y55F3AM.18b	miRNA	WBGene00194824	1.3619	0	1.82475	1.16085	0.593107	0.883647	0.561959	0	0	1.06222	0.879201	0.18732	11706	1.72782	1	0
mir-2209.1-5p	Y55F3AM.18a	miRNA	WBGene00194824	0	0	0	0	0	0	0	0	0	0	0	0	11705	0	1	0
mir-2209.2-3p	Y55F3AM.19b	miRNA	WBGene00194825	0	0	0	0	0	0	0	0	0	0	0	0	11708	0	1	0
mir-2209.2-5p	Y55F3AM.19a	miRNA	WBGene00194825	0	0	0	0	0	0	0	0	0	0	0	0	11707	0	1	0
mir-2209.3-3p	Y55F3AM.20b	miRNA	WBGene00194826	0.544761	0.397974	0	0.193475	0.296554	0	0.28098	0	0	0.314245	0.163343	0.0936599	11710	0.995579	1	0
mir-2209.3-5p	Y55F3AM.20a	miRNA	WBGene00194826	0	0	0	0	0	0	0	0	0	0	0	0	11709	0	1	0
mir-2210-3p	ZK593.12b	miRNA	WBGene00194805	4.35809	1.98987	1.82475	1.64454	1.68047	0.706917	3.37176	3.22389	0.649363	2.72424	1.34398	2.415	15735	0.227973	1	0
mir-2210-5p	ZK593.12a	miRNA	WBGene00194805	0	0	0	0.0967375	0	0	0.28098	0	0.649363	0	0.0322458	0.310114	15734	-1.85832	1	0
mir-2211-3p	F46A9.7b	miRNA	WBGene00194806	0	0	0	0	0	0	0	0	0	0	0	0	3035	0	1	0
mir-2211-5p	F46A9.7a	miRNA	WBGene00194806	0	0	0	0	0	0	0	0	0	0	0	0	3034	0	1	0
mir-2212-3p	R11.6b	miRNA	WBGene00194840	0	0	0	0	0	0	0	0	0	0	0	0	4784	0	1	0
mir-2212-5p	R11.6a	miRNA	WBGene00194840	1.63428	1.98987	0.608251	0.0967375	0.296554	0.530188	1.12392	0	0	1.4108	0.307826	0.37464	4783	2.13855	1	0
mir-2213-3p	F31E3.7b	miRNA	WBGene00194827	0	0	0	0	0	0	0	0	0	0	0	0	2723	0	1	0
mir-2213-5p	F31E3.7a	miRNA	WBGene00194827	0	0	0	0	0	0	0	0	0	0	0	0	2722	0	1	0
mir-2214-3p	B0361.12b	miRNA	WBGene00194828	0.272381	1.98987	0.608251	0.0967375	0	0	0	0	0	0.956834	0.0322458	0	277	3.10358	1	0
mir-2214-5p	B0361.12a	miRNA	WBGene00194828	1.3619	1.19392	1.2165	1.5478	1.18621	0.883647	0.842939	1.61195	1.29873	1.25744	1.20589	1.2512	276	0.0760744	1	0
mir-2215-3p	Y48C3A.21b	miRNA	WBGene00194807	0	0	0	0	0	0	0	0	0	0	0	0	10635	0	1	0
mir-2215-5p	Y48C3A.21a	miRNA	WBGene00194807	0	0	0	0	0	0	0	0	0	0	0	0	10634	0	1	0
mir-2216-3p	M106.9b	miRNA	WBGene00194808	0	0	0	0	0.0988512	0	0	0	0	0	0.0329504	0	4491	0	1	0
mir-2216-5p	M106.9a	miRNA	WBGene00194808	0	0	0	0.0967375	0	0.176729	0	0	0	0	0.0911556	0	4490	0	1	0
mir-2217.1-3p	F36H12.64b	miRNA	WBGene00194829	0	0	0	0	0.0988512	0.353459	0.28098	0	0	0	0.15077	0.0936599	2818	-1.06654	1	0
mir-2217.1-5p	F36H12.64a	miRNA	WBGene00194829	0	0	0	0	0	0	0	0	0	0	0	0	2817	0	1	0
mir-2217.2-3p	C16H3.8b	miRNA	WBGene00255563	0	0	0	0	0.0988512	0	0	0	0	0	0.0329504	0	1054	0	1	0
mir-2217.2-5p	C16H3.8a	miRNA	WBGene00255563	0	0	0	0	0	0	0	0	0	0	0	0	1053	0	1	0
mir-2217.3-3p	F37B1.9b	miRNA	WBGene00255587	0.272381	0	0	0.0967375	0	0	0	0	0	0.0907935	0.0322458	0	2826	0.704946	1	0
mir-2217.3-5p	F37B1.9a	miRNA	WBGene00255587	0	0	0	0	0	0	0	0	0	0	0	0	2825	0	1	0
mir-2217.4-3p	LLC1.122b	miRNA	WBGene00255571	0	0	0	0.0967375	0.197702	0	0	0	0	0	0.0981466	0	4316	0	1	0
mir-2217.4-5p	LLC1.122a	miRNA	WBGene00255571	0	0	0	0	0	0	0	0	0	0	0	0	4315	0	1	0
mir-2217.5-3p	Y105C5A.1286b	miRNA	WBGene00255583	0	0	0	0	0	0.176729	0	0	0	0	0.0589098	0	5925	0	1	0
mir-2217.5-5p	Y105C5A.1286a	miRNA	WBGene00255583	0	0	0	0	0	0	0	0	0	0	0	0	5924	0	1	0
mir-2218.1-3p	W09G3.10b	miRNA	WBGene00194809	0	0	0	0	0	0	0	0	0	0	0	0	5618	0	1	0
mir-2218.1-5p	W09G3.10a	miRNA	WBGene00194809	0	0	0	0.0967375	0	0	0	0	0	0	0.0322458	0	5617	0	1	0
mir-2218.2-3p	W09G3.11b	miRNA	WBGene00194810	0	0	0	0.193475	0.0988512	0	0	0	0	0	0.0974421	0	5620	0	1	0
mir-2218.2-5p	W09G3.11a	miRNA	WBGene00194810	0	0	0	0	0	0	0	0	0	0	0	0	5619	0	1	0
mir-2219-3p	C31B8.17b	miRNA	WBGene00194830	0	0	0	0	0.197702	0	0	0	0	0	0.0659008	0	1291	0	1	0
mir-2219-5p	C31B8.17a	miRNA	WBGene00194830	0	0	0	0.0967375	0	0	0	0	0	0	0.0322458	0	1290	0	1	0
mir-2220-3p	Y59E1B.4b	miRNA	WBGene00194831	0	0	0.608251	0.38695	0.0988512	0.883647	0	0	0	0.20275	0.456483	0	13230	0.701408	1	0
mir-2220-5p	Y59E1B.4a	miRNA	WBGene00194831	0	0	0	0	0	0	0	0	0	0	0	0	13229	0	1	0
mir-2221-3p	F56C3.13b	miRNA	WBGene00219245	0.272381	0	0	0.193475	0.197702	0	0	0	0	0.0907935	0.130392	0	3371	0.704946	1	0
mir-228-3p	T12E12.7b	miRNA	WBGene00003321	0	0	0	0.677162	0.494256	0.530188	0.842939	0	0	0	0.567202	0.28098	5108	-1.70751	1	0
mir-229-3p	Y48G9A.16b	miRNA	WBGene00003322	0.544761	0.795948	0	0.0967375	0.395405	0.353459	0.842939	0	0	0.446903	0.281867	0.28098	10646	0.787861	1	0
mir-230-5p	F46G11.5a	miRNA	WBGene00003323	5.71999	5.57163	1.2165	1.83801	1.38392	0.706917	2.8098	3.22389	0	4.16938	1.30962	2.01123	3044	1.20486	1	0
mir-231-5p	R13A5.14a	miRNA	WBGene00003324	0	0	0	0.193475	0.395405	0.353459	0.28098	0	0	0	0.314113	0.0936599	4794	-1.06654	1	0
mir-232-5p	F13H10.7a	miRNA	WBGene00003325	0.544761	1.19392	0	0.967375	1.18621	0.530188	0.842939	1.07463	0	0.579561	0.894593	0.63919	2495	-0.206567	1	0
mir-233-5p	W03G11.5a	miRNA	WBGene00003326	0	0	0.608251	0	0	0	0	0	0	0.20275	0	0	5601	0.701408	1	0
mir-234-5p	C13B4.3a	miRNA	WBGene00003327	0	0	0	0	0	0	0	0	0	0	0	0	1032	0	1	0
mir-235-5p	T09B4.12a	miRNA	WBGene00003328	2.17905	1.5919	0	1.93475	3.26209	1.41383	1.4049	0	1.29873	1.25698	2.20356	0.901208	5045	0.501438	1	0
mir-236-5p	C52E12.7a	miRNA	WBGene00003329	1.3619	0.397974	0.608251	0.0967375	0.197702	0.176729	0.28098	0	0	0.789376	0.157056	0.0936599	2093	2.21821	1	0
mir-237-3p	F22F1.4b	miRNA	WBGene00003330	0.544761	0.397974	0	1.45106	0.988512	0.883647	0.561959	0	0	0.314245	1.10774	0.18732	2550	0.627111	1	0
mir-238-5p	K01F9.5a	miRNA	WBGene00003331	3.26857	5.17366	1.2165	3.48255	4.64601	10.0736	1.68588	1.61195	0.649363	3.21958	6.06738	1.31573	4154	1.2185	1	0
mir-239.1-3p	C34E11.5b	miRNA	WBGene00003332	1.3619	0	1.82475	0.290212	1.18621	0.883647	0	0.537316	0	1.06222	0.786691	0.179105	1402	2.59399	1	0
mir-239.2-3p	C34E11.6b	miRNA	WBGene00003333	0	0	0	0	0	0	0	0	0	0	0	0	1404	0	1	0
mir-240-5p	C39D10.10a	miRNA	WBGene00003334	10.6228	4.37771	7.29901	12.2857	13.1472	8.30628	10.1153	6.44779	3.89618	7.43319	11.2464	6.81975	1524	0.103857	0.914147	0.038984
mir-243-5p	R08C7.14a	miRNA	WBGene00003337	0.272381	0.397974	0	0.193475	0.0988512	0.176729	0	0	0	0.223451	0.156352	0	4763	1.48227	1	0
mir-244-3p	T04D1.5b	miRNA	WBGene00003338	0	0.397974	0	0.0967375	0.197702	0	0.28098	0	0	0.132658	0.0981466	0.0936599	4837	-0.198436	1	0
mir-245-5p	F55D12.7a	miRNA	WBGene00003339	0	0	0	0	0	0	0	0	0	0	0	0	3357	0	1	0
mir-246-5p	ZK593.10a	miRNA	WBGene00003340	0.272381	0	0	0.0967375	0.395405	0.353459	0.561959	0	0	0.0907935	0.281867	0.18732	15732	-0.542778	1	0
mir-247-3p	C39E6.7b	miRNA	WBGene00003341	1.90666	0.795948	0	1.06411	0.691959	1.59056	1.96686	0.537316	1.29873	0.900871	1.11555	1.26763	1531	-0.647716	1	0
mir-247-5p	C39E6.7a	miRNA	WBGene00003341	0.272381	0	0	0.0967375	0	0.176729	0	0	0	0.0907935	0.0911556	0	1530	0.704946	1	0
mir-249-3p	Y48D7A.3b	miRNA	WBGene00003343	1.90666	1.19392	0	1.35432	1.18621	1.23711	0.561959	0.537316	0	1.03353	1.25921	0.366425	10637	1.13381	1	0
mir-249-5p	Y48D7A.3a	miRNA	WBGene00003343	0	0	0	0	0	0	0	0	0	0	0	0	10636	0	1	0
mir-250-5p	F55A11.12a	miRNA	WBGene00003344	14.1638	13.1331	14.598	9.57701	17.5955	8.65974	11.8011	10.7463	4.54554	13.965	11.9441	9.031	3227	0.648684	0.321886	0.492297
mir-251-5p	F59F3.7a	miRNA	WBGene00003345	1.3619	2.38784	1.2165	0.290212	0.197702	0.176729	0.561959	1.07463	0	1.65542	0.221548	0.54553	3464	1.70046	1	0
mir-252-3p	W02B12.14b	miRNA	WBGene00003346	0	0	0	0	0	0	0	0	0	0	0	0	5533	0	1	0
mir-253-5p	F44E7.11a	miRNA	WBGene00003347	0.272381	0	0	0.0967375	0.395405	0.353459	0	0.537316	0	0.0907935	0.281867	0.179105	2983	-0.144843	1	0
mir-254-3p	ZK455.9b	miRNA	WBGene00003348	0	0	0	0	0	0	0	0	0	0	0	0	15695	0	1	0
mir-254-5p	ZK455.9a	miRNA	WBGene00003348	0.817142	0	0	0.0967375	0.197702	0.530188	0	0	0	0.272381	0.274876	0	15694	1.23461	1	0
mir-255-3p	F08F3.11b	miRNA	WBGene00003349	2.45143	1.19392	0	0.7739	0.691959	1.59056	0.842939	0	0.649363	1.21512	1.01881	0.497434	2310	1.21422	1	0
mir-255-5p	F08F3.11a	miRNA	WBGene00003349	0	0	0	0	0.0988512	0.176729	0	0	0	0	0.0918602	0	2309	0	1	0
mir-256-3p	T07H8.8b	miRNA	WBGene00003350	0	0	0	0	0	0	0	0	0	0	0	0	4980	0	1	0
mir-257-5p	Y102A5D.4a	miRNA	WBGene00003351	0.272381	0.397974	0	1.16085	0.691959	0.530188	0.28098	1.07463	0	0.223451	0.794332	0.45187	5626	-0.572226	1	0
mir-258.1-5p	AC8.8a	miRNA	WBGene00003352	0	0	0	0	0	0	0	0	0	0	0	0	84	0	1	0
mir-258.2-5p	AC8.13a	miRNA	WBGene00043991	0	0	0	0	0.0988512	0.353459	0	0	0	0	0.15077	0	83	0	1	0
mir-259-3p	F25D1.6b	miRNA	WBGene00003353	1.3619	2.78582	0.608251	0.580425	0.79081	0.883647	1.4049	1.07463	0.649363	1.58532	0.751627	1.04296	2577	0.464707	1	0
mir-2-5p	M04C9.7a	miRNA	WBGene00003261	12.5295	8.35745	9.12377	5.61077	9.29201	7.2459	6.18155	5.37316	1.94809	10.0036	7.3829	4.50093	4484	1.17792	0.136497	0.864876
mir-260-3p	F39E9.13b	miRNA	WBGene00003354	1.3619	0.795948	0.608251	0.290212	0.691959	0.176729	0.561959	2.14926	0	0.922034	0.3863	0.903741	2934	0.50471	1	0
mir-261-3p	B0034.6b	miRNA	WBGene00003355	0	0	0	0	0	0	0	0	0	0	0	0	89	0	1	0
mir-262-3p	ZK384.5b	miRNA	WBGene00003356	1.08952	0	0	0.483687	0.79081	0.883647	0.561959	0.537316	0	0.363174	0.719381	0.366425	15693	-0.617935	1	0
mir-264-3p	C14A11.8b	miRNA	WBGene00003357	0	0	0	0	0	0	0	0	0	0	0	0	1039	0	1	0
mir-265-3p	T23F6.6b	miRNA	WBGene00003358	0	0	0	0	0	0	0	0	0	0	0	0	5216	0	1	0
mir-266-5p	T14G12.7a	miRNA	WBGene00003359	0	0	0	0	0	0	0	0	0	0	0	0	5167	0	1	0
mir-267-5p	Y38E10A.27a	miRNA	WBGene00003360	0	0	0	0	0	0	0	0	0	0	0	0	9532	0	1	0
mir-268-5p	C06H2.8a	miRNA	WBGene00003361	0	0	0	0	0	0	0	0	0	0	0	0	692	0	1	0
mir-269-5p	T21D12.13a	miRNA	WBGene00003362	0	0	0	0	0	0	0	0	0	0	0	0	5197	0	1	0
mir-270-3p	T26C12.5b	miRNA	WBGene00003363	0	0	0	0	0	0	0	0	0	0	0	0	5354	0	1	0
mir-271-5p	C04F6.6a	miRNA	WBGene00003364	0	0	0	0	0	0	0	0	0	0	0	0	561	0	1	0
mir-272-3p	Y41C4A.20b	miRNA	WBGene00003365	0	0	0	0	0	0	0	0	0	0	0	0	9842	0	1	0
mir-273-3p	E01F3.2b	miRNA	WBGene00003366	0	0	0	0	0	0	0	0	0	0	0	0	2202	0	1	0
mir-2953-3p	F41G3.23b	miRNA	WBGene00219246	0	0	0	0	0	0	0	0	0	0	0	0	2942	0	1	0
mir-2953-5p	F41G3.23a	miRNA	WBGene00219246	0	0.397974	0	0.0967375	0	0	0.28098	0	0	0.132658	0.0322458	0.0936599	2941	-0.198436	1	0
mir-34-3p	Y41G9A.7b	miRNA	WBGene00003262	5.99237	7.95948	1.82475	53.786	51.5015	44.1823	13.487	5.91047	1.94809	5.25887	49.8233	7.1152	10281	-0.363271	0.70629	0.151017
mir-353-5p	D1007.17a	miRNA	WBGene00023452	0	0	0	0	0	0	0	0	0	0	0	0	2184	0	1	0
mir-354-3p	Y105E8A.31b	miRNA	WBGene00014612	0	0	0	0	0	0	0	0	0	0	0	0	8244	0	1	0
mir-355-3p	T27D12.5b	miRNA	WBGene00014534	0	0	0	0	0.197702	0	0	0	0	0	0.0659008	0	5361	0	1	0
mir-35-5p	Y62F5A.2a	miRNA	WBGene00003263	1.08952	0	0	4.44992	8.79776	3.88805	1.12392	0.537316	1.29873	0.363174	5.71191	0.986653	13269	-1.89274	1	0
mir-356.1-5p	ZK652.12a	miRNA	WBGene00023453	0	0	0	0	0	0	0	0	0	0	0	0	15790	0	1	0
mir-356.2-5p	ZK652.13a	miRNA	WBGene00195236	0	0	0	0	0.0988512	0.176729	0.28098	0	0	0	0.0918602	0.0936599	15791	-1.06654	1	0
mir-357-3p	F25G6.10b	miRNA	WBGene00023454	42.4914	24.6744	22.5053	8.99659	9.88512	9.18993	28.098	16.6568	11.0392	29.8903	9.35721	18.598	2583	0.702377	0.123176	0.909476
mir-357-5p	F25G6.10a	miRNA	WBGene00023454	0	0	0	0	0	0	0	0	0	0	0	0	2582	0	1	0
mir-358-3p	F25G6.11b	miRNA	WBGene00023455	21.7905	10.3473	13.9898	7.739	8.20465	9.54339	10.1153	9.13437	4.54554	15.3758	8.49568	7.93173	2585	0.939357	0.142363	0.846604
mir-358-5p	F25G6.11a	miRNA	WBGene00023455	3.81333	1.5919	2.433	2.51517	1.58162	1.94402	3.37176	1.07463	0.649363	2.61274	2.01361	1.69858	2584	0.718133	1	0
mir-359-3p	Y41G9A.9b	miRNA	WBGene00023457	13.619	11.5412	5.47426	1.74127	1.38392	3.35786	4.77665	5.37316	3.89618	10.2115	2.16102	4.682	10282	1.1071	0.147632	0.830821
mir-360-3p	Y23B4A.3b	miRNA	WBGene00023456	0	0	0	0	0	0	0	0	0	0	0	0	9060	0	1	0
mir-360-5p	Y23B4A.3a	miRNA	WBGene00023456	0	0	0	0	0	0	0	0	0	0	0	0	9059	0	1	0
mir-36-5p	Y62F5A.3a	miRNA	WBGene00003264	0.544761	1.19392	0.608251	0	0.197702	0.176729	0.842939	1.61195	0	0.782311	0.124811	0.818295	13271	0.124301	1	0
mir-37-5p	Y62F5A.4a	miRNA	WBGene00003265	2.99619	2.38784	0.608251	2.22496	2.37243	2.47421	1.96686	2.14926	1.29873	1.99743	2.3572	1.80495	13273	0.0711196	1	0
mir-38-5p	Y62F5A.5a	miRNA	WBGene00003266	0	1.5919	0.608251	2.61191	4.84371	4.59496	0.561959	0.537316	0.649363	0.733382	4.01686	0.582879	13275	-0.450283	1	0
mir-392-3p	F54B11.12b	miRNA	WBGene00014391	1.90666	0.397974	0	0.580425	0.593107	0.706917	0.561959	1.07463	1.29873	0.768213	0.626817	0.978439	3218	-0.749278	1	0
mir-392-5p	F54B11.12a	miRNA	WBGene00014391	0	0	0	0	0	0.353459	0	0	0	0	0.11782	0	3217	0	1	0
mir-39-3p	Y62F5A.6b	miRNA	WBGene00003267	2779.37	2176.92	1431.21	1292.03	1239.5	1898.43	2485.55	1920.9	974.694	2129.17	1476.65	1793.71	13278	0.296767	0.183794	0.735669
mir-39-5p	Y62F5A.6a	miRNA	WBGene00003267	3.54095	1.19392	1.2165	0.193475	1.38392	1.06038	1.12392	1.07463	0.649363	1.98379	0.879256	0.949304	13277	0.98208	1	0
mir-40-5p	Y62F5A.7a	miRNA	WBGene00003268	0	0	0	0.677162	0.889661	0.530188	0	0	0	0	0.699004	0	13279	0	1	0
mir-41-5p	Y62F5A.8a	miRNA	WBGene00003269	7.89904	15.521	8.51551	6.86836	10.9725	6.89245	3.09078	10.7463	3.24681	10.6452	8.24443	5.69464	13281	1.04042	0.1607	0.793983
mir-42-5p	ZK930.8a	miRNA	WBGene00003270	0	0	0	0.0967375	0.296554	0.176729	0	0	0.649363	0	0.190007	0.216454	15812	-1.06979	1	0
mir-43-3p	ZK930.9b	miRNA	WBGene00003271	31.8685	39.7974	28.5878	14.5106	29.3588	42.0616	22.7594	26.3285	22.0783	33.4179	28.6437	23.7221	15815	0.490017	0.244293	0.612089
mir-43-5p	ZK930.9a	miRNA	WBGene00003271	0	0	0	0.193475	0.691959	0.530188	0	0	0	0	0.471874	0	15814	0	1	0
mir-44-5p	ZK930.10a	miRNA	WBGene00003272	1.90666	4.37771	1.2165	0.870637	1.48277	0.530188	0.561959	2.68658	0	2.50029	0.961198	1.08285	15808	1.5768	1	0
mir-45-5p	ZK930.11a	miRNA	WBGene00003273	2.72381	3.18379	1.2165	1.45106	2.66898	1.23711	0.842939	0.537316	0	2.3747	1.78572	0.460085	15810	2.3452	1	0
mir-4805-3p	K02E7.13b	miRNA	WBGene00195238	0	0	1.2165	0	0.197702	0.176729	0	0.537316	0	0.405501	0.124811	0.179105	4207	0.12554	1	0
mir-4805-5p	K02E7.13a	miRNA	WBGene00195238	0	0	0	0	0	0	0	0	0	0	0	0	4206	0	1	0
mir-4806-3p	C44C11.7b	miRNA	WBGene00219222	0	0	0	0	0	0	0	0	0	0	0	0	1635	0	1	0
mir-4806-5p	C44C11.7a	miRNA	WBGene00219222	0	0	0	0.0967375	0.0988512	0	0	0	0	0	0.0651962	0	1634	0	1	0
mir-4807-3p	Y59E1B.6b	miRNA	WBGene00219247	1.08952	1.19392	0	0.193475	0.494256	0.706917	0.561959	0	0.649363	0.761148	0.464883	0.403774	13231	0.866742	1	0
mir-4808-3p	Y59E1B.7b	miRNA	WBGene00219248	0.272381	0	0	0	0	0.353459	0.561959	0	0	0.0907935	0.11782	0.18732	13233	-0.542778	1	0
mir-4808-5p	Y59E1B.7a	miRNA	WBGene00219248	0	0	0	0	0	0.176729	0	0	0	0	0.0589098	0	13232	0	1	0
mir-4809-3p	Y59E1B.8b	miRNA	WBGene00219249	0	0	0	0	0	0	0.561959	0	0	0	0	0.18732	13235	-1.46892	1	0
mir-4809-5p	Y59E1B.8a	miRNA	WBGene00219249	0	0	0	0	0	0	0	0	0	0	0	0	13234	0	1	0
mir-4810.1-3p	Y59E1B.9b	miRNA	WBGene00219250	0	0	0	0.0967375	0.0988512	0	0	0	0	0	0.0651962	0	13236	0	1	0
mir-4810.2-3p	Y59E1B.15b	miRNA	WBGene00255581	0	0	0	0.0967375	0	0	0	0	0	0	0.0322458	0	13227	0	1	0
mir-4810.2-5p	Y59E1B.15a	miRNA	WBGene00255581	0	0	0	0	0	0	0	0	0	0	0	0	13226	0	1	0
mir-4811-3p	C55B6.8b	miRNA	WBGene00219251	0.272381	0	0	0	0.0988512	0.176729	0	0	0	0.0907935	0.0918602	0	2113	0.704946	1	0
mir-4811-5p	C55B6.8a	miRNA	WBGene00219251	0	0	0	0	0	0	0	0	0	0	0	0	2112	0	1	0
mir-4812-3p	F46F2.8b	miRNA	WBGene00189970	0.272381	0	0	0	0	0	0	0	0	0.0907935	0	0	3041	0.704946	1	0
mir-4812-5p	F46F2.8a	miRNA	WBGene00189970	0.272381	0	0	0.0967375	0	0	0.28098	0	0	0.0907935	0.0322458	0.0936599	3040	-0.186497	1	0
mir-4813-3p	F35G12.13b	miRNA	WBGene00195008	1.90666	1.19392	1.2165	0.580425	2.07588	1.59056	1.68588	0.537316	0.649363	1.43903	1.41562	0.957519	2761	0.658213	1	0
mir-4813-5p	F35G12.13a	miRNA	WBGene00195008	0.272381	0	0	0.0967375	0.0988512	0.706917	0	0	0	0.0907935	0.300835	0	2760	0.704946	1	0
mir-4814-3p	W06F12.9b	miRNA	WBGene00219223	0	0	0	0.483687	0.296554	0.353459	0	0	0	0	0.3779	0	5608	0	1	0
mir-4814-5p	W06F12.9a	miRNA	WBGene00219223	0.544761	0	0	0	0	0.176729	0	0	0	0.181587	0.0589098	0	5607	1.11514	1	0
mir-4815-3p	T19E7.28b	miRNA	WBGene00219252	0	0	0	0	0	0	0	0	0	0	0	0	5187	0	1	0
mir-4916-3p	T09B4.20b	miRNA	WBGene00219253	2.72381	4.37771	3.04126	1.25759	1.87817	1.94402	3.93372	1.61195	0	3.38092	1.69326	1.84855	5048	1.12925	1	0
mir-4916-5p	T09B4.20a	miRNA	WBGene00219253	0.544761	0	0	0.677162	0.197702	0.176729	0.28098	0	0	0.181587	0.350531	0.0936599	5047	0.168245	1	0
mir-4920-5p	F42G8.17a	miRNA	WBGene00219254	0	0	0	0.0967375	0	0.176729	0	0	0	0	0.0911556	0	2976	0	1	0
mir-4921-3p	Y59E1B.10b	miRNA	WBGene00219255	0	0	0	0	0	0	0	0	0	0	0	0	13222	0	1	0
mir-4922.1-3p	C04E12.13b	miRNA	WBGene00219256	0	0	0	0.193475	0	0	0	0	0	0	0.0644917	0	555	0	1	0
mir-4922.2-3p	F35F10.16b	miRNA	WBGene00219257	0	0	0	0	0	0	0	0	0	0	0	0	2759	0	1	0
mir-4923.1-3p	Y59E1B.11b	miRNA	WBGene00219258	0	0	0	0	0	0	0	0	0	0	0	0	13223	0	1	0
mir-4923.2-3p	Y59E1B.12b	miRNA	WBGene00219259	0.544761	0.397974	0	0	0.197702	0.353459	0	0	0	0.314245	0.18372	0	13224	1.86278	1	0
mir-4924-5p	T11G6.10a	miRNA	WBGene00219224	0	0	0	0	0	0	0	0	0	0	0	0	5064	0	1	0
mir-4925-3p	Y59E1B.13b	miRNA	WBGene00219260	0	0	0	0	0	0	0	0.537316	0	0	0	0.179105	13225	-1.09354	1	0
mir-4926-5p	C27A12.13a	miRNA	WBGene00219261	0	0.397974	0	0	0	0	0	0	0	0.132658	0	0	1156	0.678891	1	0
mir-4927-5p	M01F1.11a	miRNA	WBGene00219225	0	0	0	0.0967375	0	0	0	0	0	0	0.0322458	0	4411	0	1	0
mir-4929-3p	E01G4.9b	miRNA	WBGene00219226	1.08952	0.397974	1.82475	0.0967375	0.395405	0	1.12392	0	0	1.10408	0.164047	0.37464	2203	1.73584	1	0
mir-4930-5p	Y38F2AR.22a	miRNA	WBGene00219262	0	0	0	0	0	0	0	0	0	0	0	0	9535	0	1	0
mir-4931-3p	Y71F9AL.23b	miRNA	WBGene00219263	0	0	0	0	0	0	0	0	0	0	0	0	13982	0	1	0
mir-4932-5p	C41G7.14a	miRNA	WBGene00219227	0	0	0	0	0	0	0	0	0	0	0	0	1601	0	1	0
mir-4933-5p	W09H1.8a	miRNA	WBGene00219228	0	0	0	0	0	0	0	0	0	0	0	0	5622	0	1	0
mir-4934-3p	W08D2.14b	miRNA	WBGene00219229	0	0	0	0	0	0	0	0	0	0	0	0	5611	0	1	0
mir-4935-5p	Y51A2D.39a	miRNA	WBGene00219230	0	0	0	0	0	0	0	0	0	0	0	0	10804	0	1	0
mir-4936-3p	Y53G8AL.5b	miRNA	WBGene00219264	15.2533	9.55137	11.5568	6.38467	9.48972	5.12515	13.768	8.59705	9.74044	12.1205	6.99985	10.7018	11691	0.178256	0.796457	0.0988378
mir-4937-5p	C07B3.1a	miRNA	WBGene00219265	8.4438	5.57163	3.64951	1.06411	1.68047	1.59056	4.77665	5.37316	1.94809	5.88831	1.44505	4.03263	694	0.568436	1	0
mir-4938-5p	Y37B11A.6a	miRNA	WBGene00219266	0	0	0	0	0	0	0	0	0	0	0	0	9526	0	1	0
mir-49-5p	F19C6.6a	miRNA	WBGene00003277	0.817142	1.5919	1.2165	1.16085	1.58162	1.41383	0.561959	0.537316	0	1.20851	1.38543	0.366425	2525	1.65097	1	0
mir-50-3p	Y71G12B.29b	miRNA	WBGene00003278	0	0	0	0.967375	1.18621	1.06038	0.561959	0	0.649363	0	1.07132	0.403774	13984	-2.23204	1	0
mir-50-5p	Y71G12B.29a	miRNA	WBGene00003278	185.219	130.535	218.362	52.4317	60.4969	54.0792	193.876	112.836	108.444	178.039	55.6693	138.385	13983	0.370884	0.23711	0.625051
mir-51-3p	F36H1.7b	miRNA	WBGene00003279	2.99619	5.57163	0.608251	4.93361	6.72188	3.0044	0.842939	3.76121	0.649363	3.05869	4.88663	1.75117	2820	0.937302	1	0
mir-52-3p	Y37A1B.16b	miRNA	WBGene00003280	0.544761	0.795948	0	0.290212	1.87817	1.23711	0.28098	0.537316	0	0.446903	1.13516	0.272765	9283	0.529697	1	0
mir-53-3p	F36H1.8b	miRNA	WBGene00003281	0.272381	0.397974	0	0	0	0	0	0	0	0.223451	0	0	2822	1.48227	1	0
mir-54-3p	F09A5.5b	miRNA	WBGene00003282	581.533	530.101	314.466	411.811	532.709	618.023	784.214	393.852	222.082	475.367	520.848	466.716	2315	0.15916	0.604079	0.218906
mir-54-5p	F09A5.5a	miRNA	WBGene00003282	16.8876	11.1433	7.29901	3.8695	9.68742	2.47421	8.99135	11.2836	3.89618	11.7766	5.34371	8.05705	2314	0.577791	0.411662	0.38546
mir-5545-3p	Y47H9C.21b	miRNA	WBGene00219231	0	0	0	0	0	0	0	0	0	0	0	0	10633	0	1	0
mir-5545-5p	Y47H9C.21a	miRNA	WBGene00219231	0	0	0	0	0	0	0	0	0	0	0	0	10632	0	1	0
mir-5546-3p	Y71F9AL.22b	miRNA	WBGene00219219	0.272381	0	0	0	0	0.176729	0	0	0	0.0907935	0.0589098	0	13981	0.704946	1	0
mir-5546-5p	Y71F9AL.22a	miRNA	WBGene00219219	0	0	0	0	0	0	0	0	0	0	0	0	13980	0	1	0
mir-5547-3p	Y57A10A.42b	miRNA	WBGene00219232	0	0	0	0	0	0	0	0	0	0	0	0	11717	0	1	0
mir-5547-5p	Y57A10A.42a	miRNA	WBGene00219232	0	0	0	0	0	0	0	0	0	0	0	0	11716	0	1	0
mir-5548-3p	K09F6.12b	miRNA	WBGene00219267	0	0	0	0	0	0	0	0	0	0	0	0	4278	0	1	0
mir-5548-5p	K09F6.12a	miRNA	WBGene00219267	0	0	0	0	0	0	0	0	0	0	0	0	4277	0	1	0
mir-5549-3p	F31E3.11b	miRNA	WBGene00219220	0.544761	0.397974	0	0.290212	0.494256	0	0.561959	0	0	0.314245	0.26149	0.18732	2721	0.627111	1	0
mir-5549-5p	F31E3.11a	miRNA	WBGene00219220	0	0	0	0	0	0	0	0	0	0	0	0	2720	0	1	0
mir-5550-3p	T07A9.17b	miRNA	WBGene00219270	0	0	0	0	0	0	0	0	0	0	0	0	4961	0	1	0
mir-5550-5p	T07A9.17a	miRNA	WBGene00219270	0	0	0	0	0.0988512	0	0	0	0	0	0.0329504	0	4960	0	1	0
mir-5551-3p	C28D4.16b	miRNA	WBGene00219221	0	0	0	0	0.0988512	0	0	0	0	0	0.0329504	0	1271	0	1	0
mir-5551-5p	C28D4.16a	miRNA	WBGene00219221	3.26857	1.98987	1.2165	3.38581	2.96554	0.706917	1.68588	2.14926	1.94809	2.15831	2.35276	1.92774	1270	0.153076	1	0
mir-5552-3p	Y59A8B.39b	miRNA	WBGene00219233	0.272381	0.397974	0	0	0.0988512	0	0	0	0	0.223451	0.0329504	0	13221	1.48227	1	0
mir-5552-5p	Y59A8B.39a	miRNA	WBGene00219233	0	0	0	0	0	0	0	0	0	0	0	0	13220	0	1	0
mir-5553-3p	C46F2.2b	miRNA	WBGene00219269	0	0	0	0	0	0	0	0	0	0	0	0	1695	0	1	0
mir-5553-5p	C46F2.2a	miRNA	WBGene00219269	0	0	0	0	0	0	0	0	0	0	0	0	1694	0	1	0
mir-55-5p	F09A5.6a	miRNA	WBGene00003283	0.272381	0.397974	0	0.193475	0	0	0	0	0	0.223451	0.0644917	0	2316	1.48227	1	0
mir-5592.1-3p	F55F3.10b	miRNA	WBGene00235080	8.98856	8.35745	10.9485	15.5747	17.8921	16.4358	17.1398	9.67168	5.84427	9.43151	16.6342	10.8852	3361	-0.171736	0.834816	0.0784091
mir-5592.1-5p	F55F3.10a	miRNA	WBGene00235080	0.544761	0.795948	0.608251	0.7739	0.889661	1.06038	0.842939	0	0	0.649653	0.907979	0.28098	3360	1.45491	1	0
mir-5592.2-3p	F55F3.11b	miRNA	WBGene00235085	7.62666	10.7453	8.51551	16.1552	17.6944	16.0824	15.7349	8.59705	5.1949	8.96249	16.644	9.84227	3363	-0.0918738	0.917599	0.0373472
mir-5592.2-5p	F55F3.11a	miRNA	WBGene00235085	0	0.397974	0	0.290212	1.48277	2.29748	0.561959	0.537316	0.649363	0.132658	1.35682	0.582879	3362	-2.16074	1	0
mir-5593.1-3p	C24H12.16b	miRNA	WBGene00235087	0	0	0	0	0	0	0	0	0	0	0	0	1129	0	1	0
mir-5593.1-5p	C24H12.16a	miRNA	WBGene00235087	0	0	0	0	0	0	0	0	0	0	0	0	1128	0	1	0
mir-5593.2-3p	C24H12.17b	miRNA	WBGene00235088	0	0	0	0	0	0	0	0	0	0	0	0	1131	0	1	0
mir-5593.2-5p	C24H12.17a	miRNA	WBGene00235088	0	0	0	0	0	0	0	0	0	0	0	0	1130	0	1	0
mir-5594-3p	K12D12.10b	miRNA	WBGene00235084	0	0.397974	0.608251	0.290212	0.395405	0	0.28098	0	0	0.335408	0.228539	0.0936599	4290	0.775128	1	0
mir-5594-5p	K12D12.10a	miRNA	WBGene00235084	0	0	0	0	0	0	0	0	0	0	0	0	4289	0	1	0
mir-5595-3p	F26H11.7b	miRNA	WBGene00195007	0	0	0	0	0	0	0	0	0	0	0	0	2698	0	1	0
mir-5595-5p	F26H11.7a	miRNA	WBGene00195007	0	0	0	0	0.0988512	0	0	0	0	0	0.0329504	0	2697	0	1	0
mir-56-5p	F09A5.8a	miRNA	WBGene00003284	0	0	0	0	0.0988512	0	0	0	0	0	0.0329504	0	2318	0	1	0
mir-57-3p	T09A5.13b	miRNA	WBGene00003285	0	0	0.608251	0.193475	0.691959	0.353459	0	0	0	0.20275	0.412964	0	5042	0.701408	1	0
mir-58.2-3p	Y73B6A.7b	miRNA	WBGene00077722	1.08952	0.397974	0	0.38695	0.296554	0.353459	0.842939	0.537316	0	0.495832	0.345654	0.460085	13991	-0.00931811	1	0
mir-58.2-5p	Y73B6A.7a	miRNA	WBGene00077722	0	0.397974	0	0.38695	0.197702	0.176729	0.561959	0	0	0.132658	0.253794	0.18732	13990	-0.382054	1	0
miR58Synth	miR58Synth	miRNA	miR58Synth	0	0	0	0	0.0988512	0	0	0	0	0	0.0329504	0	4624	0	1	0
mir-59-5p	B0035.17a	miRNA	WBGene00003287	0.272381	0	0	0	0	0	0.28098	0	0	0.0907935	0	0.0936599	90	-0.186497	1	0
mir-60-5p	C32D5.13a	miRNA	WBGene00003288	0.817142	0	0	0.0967375	0	0.353459	0.842939	0	0	0.272381	0.150065	0.28098	1382	-0.176766	1	0
mir-61-3p	F55A11.9b	miRNA	WBGene00003289	1016.25	1043.09	999.356	1014.1	924.555	809.244	1231.25	780.183	505.204	1019.57	915.966	838.88	3230	0.371861	0.216355	0.664834
mir-61-5p	F55A11.9a	miRNA	WBGene00003289	5.17523	3.58176	1.82475	2.90212	5.53567	3.71132	4.49568	3.22389	1.29873	3.52725	4.0497	3.0061	3229	0.247867	1	0
mir-62-3p	T07C5.6b	miRNA	WBGene00003290	55.0209	49.3488	48.6601	52.8187	39.3428	31.8113	117.169	34.9255	31.1694	51.0099	41.3242	61.0878	4964	-0.0261469	0.962619	0.0165455
mir-63-5p	C16H3.5a	miRNA	WBGene00003291	19.8838	27.0622	17.6393	13.64	16.1127	19.4402	20.5115	12.3583	8.44172	21.5284	16.3977	13.7705	1051	0.658893	0.232484	0.633607
mir-64-3p	Y48G9A.13b	miRNA	WBGene00003292	0	0	0	0	0	0	0	0	0	0	0	0	10640	0	1	0
mir-65-3p	Y48G9A.14b	miRNA	WBGene00003293	0.272381	0	0	0	0	0	0.28098	0	0	0.0907935	0	0.0936599	10642	-0.186497	1	0
mir-66-3p	Y48G9A.15b	miRNA	WBGene00003294	2.99619	2.38784	0.608251	3.57929	2.86669	1.59056	0.561959	0	0.649363	1.99743	2.67885	0.403774	10644	2.34628	1	0
mir-67-5p	EGAP1.2a	miRNA	WBGene00003295	0.272381	0	0	0.193475	0.197702	0	0.842939	0.537316	0	0.0907935	0.130392	0.460085	2226	-1.59708	1	0
mir-70-5p	T10H9.7a	miRNA	WBGene00003298	1.90666	3.18379	3.64951	1.74127	1.48277	1.59056	0.842939	2.68658	1.29873	2.91332	1.60487	1.60941	5055	0.925165	1	0
mir-71-3p	F16A11.4b	miRNA	WBGene00003299	2.99619	3.97974	4.25776	6.67489	8.00695	5.47861	5.90057	2.68658	0.649363	3.74456	6.72015	3.07884	2510	0.427666	1	0
mir-72-3p	F53G2.9b	miRNA	WBGene00003300	9.53332	11.9392	4.86601	9.86722	16.607	11.4874	3.93372	6.44779	1.94809	8.77952	12.6539	4.10986	3215	1.13855	0.168836	0.772536
mir-73-5p	T24D8.9a	miRNA	WBGene00003301	0.544761	0.397974	0	1.74127	2.27358	0.883647	0.561959	0	0	0.314245	1.63283	0.18732	5348	0.627111	1	0
mir-74-5p	T24D8.7a	miRNA	WBGene00003302	0	0.795948	0	0.870637	2.17473	0.353459	1.4049	1.61195	0	0.265316	1.13294	1.00562	5344	-1.99409	1	0
mir-75-5p	T24D8.8a	miRNA	WBGene00003303	5.71999	4.77569	1.82475	0.193475	0.79081	0.530188	1.68588	1.07463	0.649363	4.10681	0.504824	1.13662	5346	1.83673	1	0
mir-76-5p	C44B11.5a	miRNA	WBGene00003304	0	0	0	0	0	0	0	0	0	0	0	0	1629	0	1	0
mir-78-3p	Y40H7A.12b	miRNA	WBGene00003306	27.0556	17.9088	18.2475	23.8293	13.0148	14.5501	30.6268	15.9422	14.0717	21.0706	17.1314	20.2135	9582	0.0817912	0.889682	0.0507653
mir-784-3p	C18A11.8b	miRNA	WBGene00045341	0	0	0	0.0967375	0	0	0	0	0	0	0.0322458	0	1076	0	1	0
mir-784-5p	C18A11.8a	miRNA	WBGene00045341	7.62666	2.38784	1.82475	3.48255	1.77932	2.82767	1.12392	2.68658	1.29873	3.94642	2.69651	1.70307	1075	1.1257	1	0
mir-785-3p	Y41G9A.11b	miRNA	WBGene00045342	28.8723	20.2967	7.29901	14.9943	11.269	11.4874	15.7349	10.209	3.89618	18.8227	12.5836	9.94668	10278	0.92315	0.106493	0.97268
mir-785-5p	Y41G9A.11a	miRNA	WBGene00045342	0	0	0	0	0	0	0	0	0	0	0	0	10277	0	1	0
mir-786-5p	C39D10.12a	miRNA	WBGene00045343	0.272381	0	0	0	0.0988512	0.353459	0.28098	0	0	0.0907935	0.15077	0.0936599	1526	-0.186497	1	0
mir-787-3p	F08G12.12b	miRNA	WBGene00045324	7.62666	5.17366	7.90726	7.739	8.69891	7.95282	8.14841	5.37316	2.59745	6.90253	8.13024	5.37301	2312	0.373607	0.695946	0.157425
mir-787-5p	F08G12.12a	miRNA	WBGene00045324	0	0	0	0	0	0	0	0	0	0	0	0	2311	0	1	0
mir-788-3p	T01B10.6b	miRNA	WBGene00045350	4.63047	2.38784	1.2165	1.06411	0.593107	1.41383	1.4049	1.07463	0	2.74494	1.02368	0.82651	4816	1.81251	1	0
mir-788-5p	T01B10.6a	miRNA	WBGene00045350	1.08952	0	0	0.7739	0.296554	0.883647	0.561959	0.537316	0	0.363174	0.651367	0.366425	4815	-0.617935	1	0
mir-789.1-3p	Y51H4A.34b	miRNA	WBGene00045325	4.63047	4.77569	3.64951	2.51517	3.45979	3.0044	9.55331	2.14926	5.84427	4.35189	2.99312	5.84895	11057	-0.296728	1	0
mir-789.1-5p	Y51H4A.34a	miRNA	WBGene00045325	0	0.795948	1.82475	0.193475	0.0988512	0.176729	0.561959	0.537316	0	0.873567	0.156352	0.366425	11056	0.420674	1	0
mir-789.2-3p	T28F3.10b	miRNA	WBGene00045326	3.54095	2.38784	3.04126	3.67602	3.55864	2.12075	4.77665	5.37316	3.24681	2.99002	3.11847	4.46554	5431	-0.579198	1	0
mir-789.2-5p	T28F3.10a	miRNA	WBGene00045326	0	0	0	0.193475	0.197702	0.176729	0.28098	0	0	0	0.189302	0.0936599	5430	-1.06654	1	0
mir-790-3p	T12E12.8b	miRNA	WBGene00045351	0	0	0	0.38695	0.691959	0.530188	0	0	0	0	0.536366	0	5110	0	1	0
mir-790-5p	T12E12.8a	miRNA	WBGene00045351	21.9266	13.5311	6.99489	22.1045	13.2461	11.6641	14.6109	6.98511	3.24681	14.1509	15.6716	8.28095	5109	0.842631	0.195999	0.707746
mir-791-3p	F13D11.5b	miRNA	WBGene00045352	7.35428	5.96961	3.04126	1.35432	1.77932	0.883647	1.68588	5.37316	0.649363	5.45505	1.3391	2.56947	2350	1.34173	1	0
mir-791-5p	F13D11.5a	miRNA	WBGene00045352	1.08952	0	1.2165	0.290212	0.197702	0.176729	0.28098	0	0	0.768675	0.221548	0.0936599	2349	1.78006	1	0
mir-792-3p	F59D6.8b	miRNA	WBGene00045353	1.90666	2.38784	1.2165	0.870637	0.988512	1.41383	1.12392	0	1.29873	1.837	1.09099	0.807548	3461	1.35464	1	0
mir-792-5p	F59D6.8a	miRNA	WBGene00045353	0	0	0	0	0	0	0	0	0	0	0	0	3460	0	1	0
mir-793-3p	M03B6.6b	miRNA	WBGene00045327	20.9733	9.1534	5.47426	26.7963	12.4553	18.2031	23.8833	10.209	7.14299	11.867	19.1516	13.7451	4415	-0.224277	0.730643	0.136295
mir-794-3p	T07D10.7b	miRNA	WBGene00045328	0.544761	1.19392	0.608251	0.0967375	0	0.176729	0.561959	0	0	0.782311	0.0911556	0.18732	4966	1.88487	1	0
mir-794-5p	T07D10.7a	miRNA	WBGene00045328	14.9809	5.17366	4.25776	7.83574	5.53567	4.59496	4.49568	1.07463	5.84427	8.13745	5.98879	3.80486	4965	1.15932	0.218698	0.660155
mir-795-3p	F33E2.9b	miRNA	WBGene00045329	0	0.397974	0	0.290212	0.197702	0	0	0.537316	0.649363	0.132658	0.162638	0.39556	2730	-1.04342	1	0
mir-79-5p	C12C8.4a	miRNA	WBGene00003307	2.99619	7.16353	2.433	0.193475	0.0988512	0.353459	0.28098	1.07463	1.29873	4.19757	0.215262	0.884779	1029	2.3615	1	0
mir-796-5p	C14E2.8a	miRNA	WBGene00045354	1.08952	0	0	0.193475	0.395405	0	0	0	0	0.363174	0.196293	0	1040	1.28785	1	0
mir-797-3p	C39E6.8b	miRNA	WBGene00045358	0	0.795948	0	0.0967375	0.0988512	0	0.28098	0	0	0.265316	0.0651962	0.0936599	1533	0.0658293	1	0
mir-797-5p	C39E6.8a	miRNA	WBGene00045358	2.17905	1.98987	1.2165	1.35432	1.08736	1.41383	1.68588	1.07463	0	1.79514	1.28517	0.92017	1532	1.15152	1	0
mir-798-3p	Y64G10A.14b	miRNA	WBGene00045330	1.08952	1.5919	1.2165	6.9651	5.93107	5.65534	5.33861	4.83584	1.94809	1.29931	6.18384	4.04085	13333	-1.63775	1	0
mir-799-3p	F18E9.9b	miRNA	WBGene00045359	10.0781	9.1534	7.29901	9.86722	10.8736	8.30628	12.6441	2.14926	5.84427	8.8435	9.68238	6.87921	2522	0.539622	0.529241	0.276347
mir-800-3p	R04A9.8b	miRNA	WBGene00045360	0	0.397974	0	0.7739	0.889661	0.530188	0.561959	0	0	0.132658	0.73125	0.18732	4633	-0.382054	1	0
mir-800-5p	R04A9.8a	miRNA	WBGene00045360	0.817142	0.795948	0	0.290212	0.296554	0	0.28098	0	0	0.537697	0.195589	0.0936599	4632	1.5858	1	0
mir-81-5p	T07D1.6a	miRNA	WBGene00003309	1.3619	0.795948	1.2165	1.74127	3.16324	0.883647	1.68588	1.07463	0	1.12478	1.92939	0.92017	4969	0.46403	1	0
mir-8186.1-3p	C01B12.11b	miRNA	WBGene00255560	0	0	0	0	0	0	0	0	0	0	0	0	450	0	1	0
mir-8186.1-5p	C01B12.11a	miRNA	WBGene00255560	0	0	0	0	0	0	0	0	0	0	0	0	449	0	1	0
mir-8186.2-3p	C01B12.12b	miRNA	WBGene00255561	0	0	0	0	0	0	0	0	0	0	0	0	452	0	1	0
mir-8186.2-5p	C01B12.12a	miRNA	WBGene00255561	0	0	0	0	0	0	0	0	0	0	0	0	451	0	1	0
mir-8187-3p	Y105E8A.51b	miRNA	WBGene00255584	0	0	0	0	0	0	0	0	0	0	0	0	8247	0	1	0
mir-8187-5p	Y105E8A.51a	miRNA	WBGene00255584	0	0	0	0	0	0	0	0	0	0	0	0	8246	0	1	0
mir-8188-3p	T27D12.11b	miRNA	WBGene00255575	0	0	0	0	0	0	0	0	0	0	0	0	5359	0	1	0
mir-8188-5p	T27D12.11a	miRNA	WBGene00255575	0	0	0	0	0	0	0	0	0	0	0	0	5358	0	1	0
mir-8189-3p	R05C11.6b	miRNA	WBGene00255572	0	0	0	0.0967375	0.197702	0	0	0	0	0	0.0981466	0	4748	0	1	0
mir-8189-5p	R05C11.6a	miRNA	WBGene00255572	0	0	0	0	0	0	0	0	0	0	0	0	4747	0	1	0
mir-8190-3p	W02B9.4b	miRNA	WBGene00255576	0	0	0	0.0967375	0.197702	0	0.28098	0	0	0	0.0981466	0.0936599	5535	-1.06654	1	0
mir-8190-5p	W02B9.4a	miRNA	WBGene00255576	0	0	0	0	0	0	0	0	0	0	0	0	5534	0	1	0
mir-8191-3p	C09B9.86b	miRNA	WBGene00255562	0	0.397974	0	0.0967375	0	0	0	0	0	0.132658	0.0322458	0	874	0.678891	1	0
mir-8191-5p	C09B9.86a	miRNA	WBGene00255562	2.99619	8.35745	4.86601	3.48255	2.76783	2.47421	1.4049	3.22389	1.94809	5.40655	2.9082	2.19229	873	1.26335	1	0
mir-8192-3p	F22D3.9b	miRNA	WBGene00199918	0	0	0	0	0	0.176729	0	0	0	0	0.0589098	0	2548	0	1	0
mir-8192-5p	F22D3.9a	miRNA	WBGene00199918	0	0	0	0	0	0	0	0	0	0	0	0	2547	0	1	0
mir-8193-3p	Y23H5B.14b	miRNA	WBGene00255578	0	0	0	0	0	0	0	0	0	0	0	0	9064	0	1	0
mir-8193-5p	Y23H5B.14a	miRNA	WBGene00255578	0	0	0	0	0	0	0	0	0	0	0	0	9063	0	1	0
mir-8194-3p	Y50D4A.11b	miRNA	WBGene00255579	0	0	0	0	0	0	0	0	0	0	0	0	10803	0	1	0
mir-8194-5p	Y50D4A.11a	miRNA	WBGene00255579	0	0	0	0	0	0	0	0	0	0	0	0	10802	0	1	0
mir-8195-3p	F53G2.11b	miRNA	WBGene00255569	0	0.397974	0.608251	0	0.0988512	0	0.28098	0	0	0.335408	0.0329504	0.0936599	3213	0.775128	1	0
mir-8195-5p	F53G2.11a	miRNA	WBGene00255569	0	0	0	0	0	0	0	0	0	0	0	0	3212	0	1	0
mir-8196.1-3p	T01B6.12b	miRNA	WBGene00220055	0	0	0	0.38695	0.0988512	0.176729	0	0	0	0	0.220844	0	4821	0	1	0
mir-8196.1-5p	T01B6.12a	miRNA	WBGene00220055	0	0	0	0	0	0	0	0	0	0	0	0	4820	0	1	0
mir-8196.2-3p	C11H1.12b	miRNA	WBGene00219810	0	0	0	0.0967375	0.197702	0	0	0	0	0	0.0981466	0	1028	0	1	0
mir-8196.2-5p	C11H1.12a	miRNA	WBGene00219810	0	0	0	0	0	0	0	0	0	0	0	0	1027	0	1	0
mir-8197-3p	T09F5.21b	miRNA	WBGene00255573	0	0	0	0	0	0	0	0	0	0	0	0	5051	0	1	0
mir-8197-5p	T09F5.21a	miRNA	WBGene00255573	0	0	0	0	0	0	0	0	0	0	0	0	5050	0	1	0
mir-8198-5p	H25K10.142a	miRNA	WBGene00255588	0	0	0	0.0967375	0.0988512	0.0883647	0	0	0	0	0.0946511	0	3932	0	1	0
mir-8200-3p	C50H11.19b	miRNA	WBGene00255566	0	0	0	0	0	0	0	0	0	0	0	0	1974	0	1	0
mir-8200-5p	C50H11.19a	miRNA	WBGene00255566	0	0	0	0	0	0	0	0	0	0	0	0	1973	0	1	0
mir-8201-3p	Y73B6BL.290b	miRNA	WBGene00255582	0	0	0.608251	0	0	0	0	0	0	0.20275	0	0	14164	0.701408	1	0
mir-8201-5p	Y73B6BL.290a	miRNA	WBGene00255582	0	0	0	0	0.395405	0	0	0	0	0	0.131802	0	14163	0	1	0
mir-8202-3p	C11D2.102b	miRNA	WBGene00255586	0	0	0	0	0.0988512	0	0	0	0	0	0.0329504	0	937	0	1	0
mir-8203-3p	C39D10.18b	miRNA	WBGene00255565	0	0	0	0	0	0	0	0	0	0	0	0	1529	0	1	0
mir-8203-5p	C39D10.18a	miRNA	WBGene00255565	0	0	0	0	0.0988512	0	0	0	0	0	0.0329504	0	1528	0	1	0
mir-8204-3p	F21A9.4b	miRNA	WBGene00255568	0	0	0	0	0	0	0	0	0	0	0	0	2540	0	1	0
mir-8204-5p	F21A9.4a	miRNA	WBGene00255568	0	0	0	0.0967375	0.395405	0	0	0	0	0	0.164047	0	2539	0	1	0
mir-8205-3p	W09C5.16b	miRNA	WBGene00255577	0	0	0	0.0967375	0	0.176729	0	0	0.649363	0	0.0911556	0.216454	5615	-1.06979	1	0
mir-8205-5p	W09C5.16a	miRNA	WBGene00255577	0	0	0	0	0.0988512	0	0	0	0	0	0.0329504	0	5614	0	1	0
mir-8206-3p	C23G10.13b	miRNA	WBGene00255564	0.544761	0	0	0.0967375	0.0988512	0.176729	0	0	0	0.181587	0.124106	0	1087	1.11514	1	0
mir-8206-5p	C23G10.13a	miRNA	WBGene00255564	0	0	0	0	0	0	0	0	0	0	0	0	1086	0	1	0
mir-8207-3p	K01A6.22b	miRNA	WBGene00255570	0	0	0	0	0	0	0	0	0	0	0	0	4148	0	1	0
mir-8207-5p	K01A6.22a	miRNA	WBGene00255570	0	0	0	0	0	0	0	0	0	0	0	0	4147	0	1	0
mir-8208-3p	T11G6.12b	miRNA	WBGene00255574	0	0	0	0	0	0	0	0	0	0	0	0	5066	0	1	0
mir-8208-5p	T11G6.12a	miRNA	WBGene00255574	0	0	0	0	0	0	0	0	0	0	0	0	5065	0	1	0
mir-8209-3p	T22C1.13b	miRNA	WBGene00195833	0	0	0	0	0	0	0	0	0	0	0	0	5203	0	1	0
mir-8209-5p	T22C1.13a	miRNA	WBGene00195833	0	0	0	0	0	0	0	0	0	0	0	0	5202	0	1	0
mir-8210-3p	C54G10.6b	miRNA	WBGene00201935	0	0	0	0	0	0	0	0	0	0	0	0	2109	0	1	0
mir-8210-5p	C54G10.6a	miRNA	WBGene00201935	0.272381	0	0	0.0967375	0	0	0	0	0	0.0907935	0.0322458	0	2108	0.704946	1	0
mir-8211-3p	Y56A3A.40b	miRNA	WBGene00255580	0	0	0	0	0	0	0	0	0	0	0	0	11715	0	1	0
mir-8211-5p	Y56A3A.40a	miRNA	WBGene00255580	0	0	0	0	0	0	0	0	0	0	0	0	11714	0	1	0
mir-8212-3p	F07A11.16b	miRNA	WBGene00255567	0	0	0	0.0967375	0	0	0	0	0	0	0.0322458	0	2302	0	1	0
mir-8212-5p	F07A11.16a	miRNA	WBGene00255567	0	0	0	0	0	0	0	0	0	0	0	0	2301	0	1	0
mir-82-5p	T07D1.7a	miRNA	WBGene00003310	0.817142	0.397974	0	0.0967375	0.395405	0	0.561959	0	0	0.405039	0.164047	0.18732	4971	0.837374	1	0
mir-83-5p	C06A6.6a	miRNA	WBGene00003311	0.817142	1.19392	0.608251	2.03149	1.08736	0	0.561959	0	0	0.873105	1.03962	0.18732	589	2.05204	1	0
mir-84-3p	B0395.4b	miRNA	WBGene00003312	0.272381	1.19392	1.2165	2.61191	2.17473	2.12075	1.4049	0.537316	1.29873	0.894268	2.30246	1.08031	279	-0.448888	1	0
mir-85-5p	F49E12.11a	miRNA	WBGene00003313	0	0	0	0	0	0	0	0	0	0	0	0	3060	0	1	0
mir-86-3p	Y56A3A.34b	miRNA	WBGene00003314	0	0.397974	0	0.677162	0.889661	0.176729	1.12392	0	0	0.132658	0.581184	0.37464	11713	-0.605969	1	0
mir-87-3p	F10C2.8b	miRNA	WBGene00003315	147.903	97.9016	85.7634	136.4	132.065	138.202	158.754	72.5376	48.7022	110.523	135.556	93.3311	2329	0.350395	0.282553	0.548901
mir-87-5p	F10C2.8a	miRNA	WBGene00003315	1.08952	0.795948	0	2.51517	2.66898	0.530188	0.561959	0	0	0.62849	1.90478	0.18732	2328	1.36128	1	0
mir-229-5p	Y48G9A.16a	miRNA	WBGene00003322	357.636	335.492	249.383	379.791	390.561	358.23	587.529	593.734	269.486	314.17	376.194	483.583	10645	-0.559674	0.0197316	1.70484
mir-90-5p	K01F9.1a	miRNA	WBGene00003318	1.08952	0.795948	0.608251	2.3217	4.64601	5.12515	1.4049	0.537316	0.649363	0.83124	4.03095	0.863859	4150	-0.00775973	1	0
