# Supplementary material for: Soma-to-Germline miRNA inheritance via Yolk Promotes Stress Resilience in Progeny
Source: Research Square preprint supplement (doi:10.21203/rs.3.rs-4711258/v1), 2025-07-09
Supplement: Supplementary file 6 [file c40c4521fb1d65707b17ff75.xlsx]

## Sheet: Supplementary Table 6
Supplementary Table 6. DE mRNAs in L1 larvae from DP degron strain mothers exposed to osmotic stress and miR-85 (n4117) mRNAs and miRNAs.

## Sheet:  300mM DP Degron Auxin vs EtOH
L1 mRNA-seq derived from P0 DP degron mothers exposed to 300mM NaCl comparing auxin (DP depleted) vs EtOH (control)
gene name	gene ID	type	cosmid	log2FC (auxin vs EtOH)	FDR
aap-1	WBGene00000001	protein_coding	Y110A7A.10	0.266774	0.149359
aat-1	WBGene00000002	protein_coding	F27C8.1	-0.421391	0.127764
aat-2	WBGene00000003	protein_coding	F07C3.7	0.0581689	0.901012
aat-3	WBGene00000004	protein_coding	F52H2.2	0.119025	0.779125
aat-4	WBGene00000005	protein_coding	T13A10.10	-0.2178	0.808348
aat-5	WBGene00000006	protein_coding	C55C2.5	0.0598046	0.924599
aat-6	WBGene00000007	protein_coding	T11F9.4	-0.70383	0.053444
aat-7	WBGene00000008	protein_coding	F54D12.3	-0.475181	0.406609
aat-8	WBGene00000009	protein_coding	F28F9.4	-0.511636	0.347927
aat-9	WBGene00000010	protein_coding	Y53H1C.1	0.239034	0.454773
abf-1	WBGene00000012	protein_coding	C50F2.9	-0.116972	0.914888
abf-2	WBGene00000013	protein_coding	C50F2.10	0.652646	0.20644
abf-3	WBGene00000014	protein_coding	F54B8.5	-0.0305701	NA
abf-4	WBGene00000015	protein_coding	Y38H6C.22	0.0266019	0.98417
abf-5	WBGene00000016	protein_coding	T22H6.5	-0.660716	0.0855192
abf-6	WBGene00000017	protein_coding	T22H6.7	-0.483876	0.241908
abl-1	WBGene00000018	protein_coding	M79.1	-0.0342109	0.925329
abt-1	WBGene00000019	protein_coding	C24F3.5	0.718973	0.123667
abt-2	WBGene00000020	protein_coding	F12B6.1	0.101072	0.827076
abt-4	WBGene00000022	protein_coding	Y39D8C.1	0.555005	0.0724535
abt-5	WBGene00000023	protein_coding	Y53C10A.9	0.440585	0.461849
abu-1	WBGene00000024	protein_coding	AC3.3	-0.157737	0.749068
abu-2	WBGene00000025	protein_coding	F19G12.7	0.161425	0.794174
abu-3	WBGene00000026	protein_coding	F31A3.1	-0.00209558	0.999143
abu-4	WBGene00000027	protein_coding	Y5H2A.3	0.222655	0.786645
abu-5	WBGene00000028	protein_coding	Y105C5A.4	0	1
abu-6	WBGene00000029	protein_coding	C03A7.7	-0.0124107	NA
abu-7	WBGene00000030	protein_coding	C03A7.8	0.0728123	0.90025
abu-8	WBGene00000031	protein_coding	C03A7.14	0.0072057	0.99906
abu-9	WBGene00000032	protein_coding	R09F10.2	-0.0415472	0.943964
abu-10	WBGene00000033	protein_coding	F35A5.3	-0.322595	0.62688
abu-11	WBGene00000034	protein_coding	T01D1.6	0.0456171	0.966054
ace-1	WBGene00000035	protein_coding	W09B12.1	-0.190973	0.640974
ace-2	WBGene00000036	protein_coding	Y44E3A.2	-0.0879849	0.713877
ace-3	WBGene00000037	protein_coding	Y48B6A.8	0.239746	0.594332
ace-4	WBGene00000038	protein_coding	Y48B6A.7	0.0319687	0.968957
acn-1	WBGene00000039	protein_coding	C42D8.5	-0.173575	0.799566
aco-1	WBGene00000040	protein_coding	ZK455.1	-0.63454	0.000431169
aco-2	WBGene00000041	protein_coding	F54H12.1	-0.39414	0.0522886
acr-2	WBGene00000042	protein_coding	K11G12.2	-0.183659	0.706487
acr-3	WBGene00000043	protein_coding	K11G12.7	0.105679	0.913929
acr-5	WBGene00000044	protein_coding	K03F8.2	-0.0642706	0.920839
acr-6	WBGene00000045	protein_coding	ZK973.5	-0.119772	0.910956
acr-7	WBGene00000046	protein_coding	T09A5.3	-0.033728	0.957206
acr-8	WBGene00000047	protein_coding	ZC504.2	-0.326683	0.210585
acr-9	WBGene00000048	protein_coding	C40C9.2	-0.0245518	0.9781
acr-10	WBGene00000049	protein_coding	R02E12.8	0.00475056	0.999143
acr-11	WBGene00000050	protein_coding	D2092.3	-0.270641	0.672119
acr-12	WBGene00000051	protein_coding	R01E6.4	-0.203916	0.639702
acr-14	WBGene00000053	protein_coding	T05C12.2	0.0119515	0.997035
acr-15	WBGene00000054	protein_coding	F25G6.4	0.097427	0.905444
acr-16	WBGene00000055	protein_coding	F25G6.3	-0.260869	0.468323
acr-17	WBGene00000056	protein_coding	F53E10.2	0.00458515	0.999143
acr-18	WBGene00000057	protein_coding	F28F8.1	0.0733631	0.927667
acr-19	WBGene00000058	protein_coding	C31H5.3	-0.213291	0.532241
acr-20	WBGene00000059	protein_coding	R06A4.10	0.101662	0.896706
acr-21	WBGene00000060	protein_coding	F27B3.2	0.0125144	0.99146
lgc-11	WBGene00000061	protein_coding	F48E3.7	-0.423855	0.43845
acr-23	WBGene00000062	protein_coding	F59B1.9	-0.390049	0.210585
act-1	WBGene00000063	protein_coding	T04C12.6	-0.347128	0.476821
act-2	WBGene00000064	protein_coding	T04C12.5	-0.224593	0.698892
act-3	WBGene00000065	protein_coding	T04C12.4	-0.290653	0.566904
act-4	WBGene00000066	protein_coding	M03F4.2	-0.156532	0.833998
act-5	WBGene00000067	protein_coding	T25C8.2	-0.542817	0.0486399
acy-1	WBGene00000068	protein_coding	F17C8.1	-0.179899	0.584345
acy-2	WBGene00000069	protein_coding	C10F3.3	-0.01288	0.985022
acy-3	WBGene00000070	protein_coding	C44F1.5	-0.108625	0.737732
acy-4	WBGene00000071	protein_coding	T01C2.1	-0.231736	0.558073
add-1	WBGene00000072	protein_coding	F39C12.2	-0.386056	0.0395389
add-2	WBGene00000073	protein_coding	F57F5.4	-0.00621607	0.997508
adm-2	WBGene00000074	protein_coding	C04A11.4	0.153838	0.649645
adm-4	WBGene00000075	protein_coding	ZK154.7	-0.21206	0.410729
adr-1	WBGene00000079	protein_coding	H15N14.1	0.22984	0.35413
adr-2	WBGene00000080	protein_coding	T20H4.4	0.160095	0.602684
ads-1	WBGene00000081	protein_coding	Y50D7A.7	-0.302623	0.339626
adt-1	WBGene00000082	protein_coding	C02B4.1	-0.0298095	0.96803
adt-2	WBGene00000083	protein_coding	F08C6.1	-0.10205	0.791308
aex-1	WBGene00000084	protein_coding	D2030.10	-0.0919764	0.883248
aex-2	WBGene00000085	protein_coding	T14B1.2	-0.0607385	0.941489
aex-3	WBGene00000086	protein_coding	C02H7.3	-0.0934933	0.813185
aex-5	WBGene00000088	protein_coding	F32A7.6	-0.804288	1.14749e-05
aex-6	WBGene00000089	protein_coding	Y87G2A.4	-0.0436159	0.942828
age-1	WBGene00000090	protein_coding	B0334.8	0.217398	0.324097
ags-3	WBGene00000092	protein_coding	F32A6.4	0.016698	0.971316
agt-1	WBGene00000093	protein_coding	Y62E10A.5	0.0749031	0.917236
agt-2	WBGene00000094	protein_coding	F09E5.13	0.169485	0.710252
aha-1	WBGene00000095	protein_coding	C25A1.11	0.106512	0.701128
ahr-1	WBGene00000096	protein_coding	C41G7.5	-0.0698468	0.909752
aip-1	WBGene00000097	protein_coding	F58E10.4	0.813748	0.000400621
air-1	WBGene00000098	protein_coding	K07C11.2	0.528904	0.155603
air-2	WBGene00000099	protein_coding	B0207.4	0.565183	0.315248
ajm-1	WBGene00000100	protein_coding	C25A11.4	-0.326583	0.151136
aka-1	WBGene00000101	protein_coding	D1022.7	0.183622	0.327448
akt-1	WBGene00000102	protein_coding	C12D8.10	-0.00024371	1
akt-2	WBGene00000103	protein_coding	F28H6.1	-0.0583203	0.922046
alg-1	WBGene00000105	protein_coding	F48F7.1	-0.0493257	0.926148
alg-2	WBGene00000106	protein_coding	T07D3.7	0.239156	0.423595
alh-1	WBGene00000107	protein_coding	F54D8.3	-0.79953	0.000137105
alh-2	WBGene00000108	protein_coding	K04F1.15	0.0730634	0.933541
alh-3	WBGene00000109	protein_coding	F36H1.6	-0.107396	0.734454
alh-4	WBGene00000110	protein_coding	T05H4.13	-0.286273	0.376526
alh-5	WBGene00000111	protein_coding	T08B1.3	-1.6488	3.33583e-20
alh-6	WBGene00000112	protein_coding	F56D12.1	-0.30372	0.265917
alh-7	WBGene00000113	protein_coding	F45H10.1	-0.163656	0.431427
alh-8	WBGene00000114	protein_coding	F13D12.4	-0.156984	0.761226
alh-9	WBGene00000115	protein_coding	F01F1.6	-0.457698	0.0103554
alh-10	WBGene00000116	protein_coding	C54D1.4	0.116969	0.790982
alh-11	WBGene00000117	protein_coding	F42G9.5	0.00592213	0.997936
alh-12	WBGene00000118	protein_coding	Y69F12A.2	-0.421196	0.00463676
aly-1	WBGene00000120	protein_coding	C01F6.5	0.466849	0.200746
aly-2	WBGene00000121	protein_coding	F23B2.6	0.912238	0.0189784
aly-3	WBGene00000122	protein_coding	M18.7	0.0133536	0.969759
ama-1	WBGene00000123	protein_coding	F36A4.7	0.49681	0.057418
amt-1	WBGene00000133	protein_coding	C05E11.4	0.190681	0.829541
amt-2	WBGene00000134	protein_coding	F49E11.3	0.0735386	0.943618
amt-3	WBGene00000135	protein_coding	M195.3	0.0223372	0.979157
amt-4	WBGene00000136	protein_coding	C05E11.5	-0.578861	0.0521155
amx-1	WBGene00000137	protein_coding	R13G10.2	-0.100788	0.796753
amx-2	WBGene00000138	protein_coding	B0019.1	0.0736565	0.897441
amx-3	WBGene00000139	protein_coding	F25C8.2	-1.02695	3.55555e-07
anc-1	WBGene00000140	protein_coding	ZK973.6	-0.180947	0.75536
aos-1	WBGene00000142	protein_coding	C08B6.9	0.353641	0.103966
apc-2	WBGene00000143	protein_coding	K06H7.6	0.0433797	0.943964
apc-10	WBGene00000144	protein_coding	F15H10.3	0.3393	0.645456
apc-11	WBGene00000145	protein_coding	F35G12.9	0.00534508	0.999072
ape-1	WBGene00000146	protein_coding	F46F3.4	0.0710372	0.807416
aph-1	WBGene00000147	protein_coding	VF36H2L.1	0.374416	0.192569
aph-2	WBGene00000148	protein_coding	ZC434.6	0.00453685	0.998955
apl-1	WBGene00000149	protein_coding	C42D8.8	0.0482769	0.955112
apm-1	WBGene00000150	protein_coding	F55A12.7	0.00729043	0.989066
apn-1	WBGene00000151	protein_coding	T05H10.2	0.0407196	0.94474
app-1	WBGene00000155	protein_coding	W03G9.4	-0.166135	0.646976
2001-04-01	WBGene00000156	protein_coding	K04G2.8	-0.0740931	0.842903
aps-2	WBGene00000157	protein_coding	F02E8.3	-0.0206236	0.970153
apg-1	WBGene00000158	protein_coding	Y105E8A.9	0.0234615	0.939629
aps-1	WBGene00000159	protein_coding	F29G9.3	0.107755	0.809947
apb-1	WBGene00000160	protein_coding	Y71H2B.10	0.0199182	0.968957
apa-2	WBGene00000161	protein_coding	T20B5.1	0.0364011	0.943964
apd-3	WBGene00000162	protein_coding	W09G10.4	-0.0127984	0.976975
apb-3	WBGene00000163	protein_coding	R11A5.1	0.247057	0.137917
apm-3	WBGene00000164	protein_coding	F53H8.1	0.0749586	0.847203
aps-3	WBGene00000165	protein_coding	Y48G8AL.14	0.412794	0.187309
apt-9	WBGene00000166	protein_coding	W04G3.4	-0.0758051	0.891463
apx-1	WBGene00000168	protein_coding	K08D9.3	0.768592	0.0653577
aqp-1	WBGene00000169	protein_coding	F32A5.5	-1.09922	7.2328e-09
aqp-2	WBGene00000170	protein_coding	C01G6.1	-0.159233	0.657867
aqp-3	WBGene00000171	protein_coding	Y69E1A.7	0.201896	0.512397
aqp-4	WBGene00000172	protein_coding	F40F9.9	-0.504269	0.0830085
aqp-5	WBGene00000173	protein_coding	C35A5.1	-0.366029	0.599824
aqp-6	WBGene00000174	protein_coding	C32C4.2	0.478412	0.391313
aqp-7	WBGene00000175	protein_coding	M02F4.8	0.0220475	0.96888
aqp-8	WBGene00000176	protein_coding	K02G10.7	0.24485	0.580643
aqp-9	WBGene00000177	protein_coding	K07A1.16	-0.64906	0.00697197
aqp-10	WBGene00000178	protein_coding	ZK1321.3	-0.641887	0.00130986
aqp-11	WBGene00000179	protein_coding	ZK525.2	-0.36603	0.0386153
arc-1	WBGene00000180	protein_coding	ZK1320.6	-0.342834	0.0277556
ard-1	WBGene00000181	protein_coding	F01G4.2	-0.444591	0.00685575
arf-1.2	WBGene00000182	protein_coding	B0336.2	-0.0857622	0.68705
arf-3	WBGene00000183	protein_coding	F57H12.1	0.0730974	0.703829
arf-6	WBGene00000184	protein_coding	Y116A8C.12	0.215651	0.368845
arg-1	WBGene00000185	protein_coding	F31A9.3	0.00784364	0.99906
ark-1	WBGene00000186	protein_coding	C01C7.1	-0.0594638	0.878345
arl-1	WBGene00000187	protein_coding	F54C9.10	-0.0277009	0.956737
arl-3	WBGene00000188	protein_coding	F19H8.3	0.203745	0.700737
arl-5	WBGene00000189	protein_coding	ZK632.8	0.286727	0.511327
arf-1.1	WBGene00000190	protein_coding	F45E4.1	0.329019	0.555809
arl-8	WBGene00000192	protein_coding	Y57G11C.13	0.30986	0.0743757
arl-6	WBGene00000193	protein_coding	C38D4.8	0.252099	0.680499
arr-1	WBGene00000195	protein_coding	F53H8.2	-0.216584	0.284356
aars-1	WBGene00000196	protein_coding	W02B12.6	-0.3437	0.141208
aars-2	WBGene00000197	protein_coding	F28H1.3	0.337961	0.120635
art-1	WBGene00000198	protein_coding	C15F1.6	-0.419667	0.00341098
arx-1	WBGene00000199	protein_coding	Y71F9AL.16	0.0168809	0.956737
arx-2	WBGene00000200	protein_coding	K07C5.1	0.142997	0.505767
arx-3	WBGene00000201	protein_coding	Y79H2A.6	0.0731767	0.708927
exos-4.2	WBGene00000202	protein_coding	Y6D11A.1	-0.0139262	0.986466
arx-5	WBGene00000203	protein_coding	Y37D8A.1	0.0527518	0.924626
arx-6	WBGene00000204	protein_coding	C35D10.16	0.174649	0.582187
arx-7	WBGene00000205	protein_coding	M01B12.3	0.358264	0.213171
asb-1	WBGene00000206	protein_coding	F35G12.10	0.603802	0.142816
asb-2	WBGene00000207	protein_coding	F02E8.1	-0.247331	0.381137
asc-1	WBGene00000208	protein_coding	Y53F4B.15	0.143319	0.717451
asg-1	WBGene00000209	protein_coding	K07A12.3	-0.180794	0.409699
asg-2	WBGene00000210	protein_coding	C53B7.4	-0.451943	0.00235185
asm-1	WBGene00000211	protein_coding	B0252.2	0.0323655	0.956874
asm-2	WBGene00000212	protein_coding	ZK455.4	-0.528705	0.292439
asm-3	WBGene00000213	protein_coding	W03G1.7	-1.29096	0.00109505
asp-1	WBGene00000214	protein_coding	Y39B6A.20	-0.50053	0.0652045
asp-2	WBGene00000215	protein_coding	T18H9.2	-0.45027	0.0460075
asp-3	WBGene00000216	protein_coding	H22K11.1	-0.57903	0.0165598
asp-4	WBGene00000217	protein_coding	R12H7.2	0.375873	0.370676
asp-5	WBGene00000218	protein_coding	F21F8.3	-0.358455	0.297344
asp-6	WBGene00000219	protein_coding	F21F8.7	-0.115079	0.865836
atf-2	WBGene00000220	protein_coding	K08F8.2	0.187125	0.844827
atf-5	WBGene00000221	protein_coding	T04C10.4	-0.192543	0.308229
atf-6	WBGene00000222	protein_coding	F45E6.2	-0.293476	0.0866718
atf-7	WBGene00000223	protein_coding	C07G2.2	0.0429225	0.894039
atgp-1	WBGene00000224	protein_coding	F26D10.9	0.216241	0.451477
atgp-2	WBGene00000225	protein_coding	C38C6.2	0.0811041	0.866942
atl-1	WBGene00000226	protein_coding	T06E4.3	0.335019	0.220956
atm-1	WBGene00000227	protein_coding	Y48G1BL.2	-0.124607	0.806844
atn-1	WBGene00000228	protein_coding	W04D2.1	-0.06658	0.912268
atp-2	WBGene00000229	protein_coding	C34E10.6	-0.21655	0.417315
atp-3	WBGene00000230	protein_coding	F27C1.7	-0.305468	0.0435248
atx-2	WBGene00000231	protein_coding	D2045.1	0.355333	0.15818
avr-14	WBGene00000232	protein_coding	B0207.12	-0.0625049	0.927691
avr-15	WBGene00000233	protein_coding	R11G10.1	-0.410318	0.113438
baf-1	WBGene00000235	protein_coding	B0464.7	0.696177	0.00307294
bag-1	WBGene00000236	protein_coding	F57B10.11	0.926042	8.07825e-05
bam-2	WBGene00000237	protein_coding	Y71F9AR.1	-0.0812705	0.904116
bar-1	WBGene00000238	protein_coding	C54D1.6	-0.169306	0.5246
bas-1	WBGene00000239	protein_coding	C05D2.4	-0.433291	0.0406923
pah-1	WBGene00000240	protein_coding	K08F8.4	-0.195094	0.687554
bbs-1	WBGene00000241	protein_coding	Y105E8A.5	0.0904816	0.914888
bbs-2	WBGene00000242	protein_coding	F20D12.3	0.168544	0.811348
bbs-8	WBGene00000244	protein_coding	T25F10.5	0.158776	0.816086
bca-1	WBGene00000245	protein_coding	T13C5.5	-0.106129	0.833726
bcc-1	WBGene00000246	protein_coding	M7.3	0.000851421	0.999496
bec-1	WBGene00000247	protein_coding	T19E7.3	0.393739	0.186014
ben-1	WBGene00000248	protein_coding	C54C6.2	-0.142689	0.671136
bir-1	WBGene00000249	protein_coding	T27F2.3	0.201819	0.589599
bir-2	WBGene00000250	protein_coding	C50B8.2	0.40306	0.54959
bli-1	WBGene00000251	protein_coding	C09G5.6	-0.376345	0.508719
bli-2	WBGene00000252	protein_coding	F59E12.12	-0.373423	0.595822
bli-3	WBGene00000253	protein_coding	F56C11.1	-0.00588432	0.993879
bli-4	WBGene00000254	protein_coding	K04F10.4	0.0923725	0.685459
bli-5	WBGene00000255	protein_coding	F45G2.5	0.121465	0.906446
bli-6	WBGene00000256	protein_coding	Y73B6BL.34	0.664739	0.0738234
bmk-1	WBGene00000257	protein_coding	F23B12.8	0.421256	0.490128
bpl-1	WBGene00000259	protein_coding	F13H8.10	-0.11301	0.617207
bra-1	WBGene00000262	protein_coding	F54B11.6	0.478479	0.237804
F23H11.5	WBGene00000263	protein_coding	F23H11.5	-0.342908	0.00456007
brc-1	WBGene00000264	protein_coding	C36A4.8	0.102061	0.891304
brd-1	WBGene00000265	protein_coding	K04C2.4	0.342028	0.602767
bre-1	WBGene00000266	protein_coding	C53B4.7	-0.150513	0.591018
bre-2	WBGene00000267	protein_coding	Y39E4B.9	-0.44241	0.14633
bre-3	WBGene00000268	protein_coding	B0464.4	-0.0694686	0.77763
bre-4	WBGene00000269	protein_coding	Y73E7A.7	-0.0597804	0.897266
bre-5	WBGene00000270	protein_coding	T12G3.8	0.164532	0.741158
brf-1	WBGene00000271	protein_coding	F45E12.2	0.210644	0.227619
bro-1	WBGene00000272	protein_coding	F56A3.5	1.01752	0.0180418
brp-1	WBGene00000273	protein_coding	Y79H2A.1	0.161991	0.716593
btf-1	WBGene00000274	protein_coding	F15D4.1	0.0755448	0.854992
bub-1	WBGene00000275	protein_coding	R06C7.8	0.292488	0.639702
byn-1	WBGene00000276	protein_coding	F57B9.5	0.00295015	0.99906
cab-1	WBGene00000277	protein_coding	C23H4.1	0.077428	0.893742
cah-1	WBGene00000279	protein_coding	F54D8.4	-0.0907126	0.891608
cah-2	WBGene00000280	protein_coding	D1022.8	-0.0176973	0.983845
cah-3	WBGene00000281	protein_coding	K05G3.3	-0.409174	0.0173446
cah-4	WBGene00000282	protein_coding	R01E6.3	-0.175029	0.73103
cah-5	WBGene00000283	protein_coding	R173.1	-0.36744	0.259551
cah-6	WBGene00000284	protein_coding	T28F2.3	0.138836	0.842903
cal-1	WBGene00000285	protein_coding	C13C12.1	0.0394405	0.945889
cal-2	WBGene00000286	protein_coding	C18E9.1	-0.0228663	0.966054
cal-3	WBGene00000287	protein_coding	M02B7.6	-0.276091	0.562687
cal-4	WBGene00000288	protein_coding	T07G12.1	0.0236947	0.967459
cam-1	WBGene00000289	protein_coding	C01G6.8	-0.0381622	0.93376
cap-1	WBGene00000292	protein_coding	D2024.6	0.141217	0.372613
cap-2	WBGene00000293	protein_coding	M106.5	0.319847	0.00394
cas-1	WBGene00000294	protein_coding	F41G4.2	0.0566715	0.942828
cat-1	WBGene00000295	protein_coding	W01C8.6	0.290357	0.665552
cat-2	WBGene00000296	protein_coding	B0432.5	-0.117679	0.894235
cat-4	WBGene00000298	protein_coding	F32G8.6	-0.717151	0.000225392
cav-1	WBGene00000301	protein_coding	T13F2.8	0.166712	0.739191
cav-2	WBGene00000302	protein_coding	C56A3.7	-0.15872	0.672376
cbp-1	WBGene00000366	protein_coding	R10E11.1	0.111791	0.694519
cca-1	WBGene00000367	protein_coding	C54D2.5	-0.0520509	0.931524
ccb-1	WBGene00000368	protein_coding	T28F2.5	-0.0206893	0.968535
ccf-1	WBGene00000369	protein_coding	Y56A3A.20	0.187221	0.4474
ccg-1	WBGene00000370	protein_coding	Y73F8A.6	-0.0907123	0.568853
cco-1	WBGene00000371	protein_coding	F26E4.9	-0.379525	0.00211232
cyp-13A7	WBGene00000372	protein_coding	T10B9.10	-0.0123592	0.996985
cyp-14A5	WBGene00000373	protein_coding	F08F3.7	0.735186	0.000260561
cyp-44A1	WBGene00000375	protein_coding	ZK177.5	-0.226696	0.595617
ccr-4	WBGene00000376	protein_coding	ZC518.3	0.140244	0.663725
cct-1	WBGene00000377	protein_coding	T05C12.7	0.188169	0.402387
cct-2	WBGene00000378	protein_coding	T21B10.7	0.267716	0.219921
cct-4	WBGene00000379	protein_coding	K01C8.10	0.368704	0.0107119
cct-5	WBGene00000380	protein_coding	C07G2.3	0.26302	0.0773843
cct-6	WBGene00000381	protein_coding	F01F1.8	0.333549	0.111904
cdc-6	WBGene00000382	protein_coding	C43E11.10	0.615675	0.0363627
cdc-14	WBGene00000383	protein_coding	C17G10.4	0.045691	0.901012
cdc-25.1	WBGene00000386	protein_coding	K06A5.7	0.872045	0.0209399
cdc-25.2	WBGene00000387	protein_coding	F16B4.8	0.295757	0.466157
cdc-25.3	WBGene00000388	protein_coding	ZK637.11	1.24643	3.00589e-05
cdc-25.4	WBGene00000389	protein_coding	R05H5.2	0.072457	NA
cdc-42	WBGene00000390	protein_coding	R07G3.1	0.204743	0.121137
cdd-1	WBGene00000391	protein_coding	C47D2.2	0.252149	0.437033
cdd-2	WBGene00000392	protein_coding	F49E8.4	0.0639615	0.947453
cdf-1	WBGene00000393	protein_coding	C15B12.7	0.0828375	0.854119
cdh-3	WBGene00000395	protein_coding	ZK112.7	-0.123429	0.851945
cdh-4	WBGene00000396	protein_coding	F25F2.2	0.0161242	0.970794
cdh-5	WBGene00000397	protein_coding	F08B4.2	1.28707	0.000612239
cdh-7	WBGene00000399	protein_coding	R05H10.6	-0.153026	0.860842
cdh-9	WBGene00000401	protein_coding	F59C12.1	-0.162678	0.794352
cdh-10	WBGene00000402	protein_coding	C45G7.5	-0.0478511	0.953086
casy-1	WBGene00000403	protein_coding	B0034.3	0.0533826	0.942775
cdk-1	WBGene00000405	protein_coding	T05G5.3	0.513414	0.389021
cdk-4	WBGene00000406	protein_coding	F18H3.5	-0.322356	0.243245
cdk-5	WBGene00000407	protein_coding	T27E9.3	0.0359623	0.918265
cdk-7	WBGene00000408	protein_coding	Y39G10AL.3	0.313442	0.232734
cdk-8	WBGene00000409	protein_coding	F39H11.3	0.0338661	0.946742
cdk-9	WBGene00000410	protein_coding	H25P06.2	0.0689578	0.833381
cdl-1	WBGene00000411	protein_coding	R06F6.1	0.358209	0.524401
cdr-1	WBGene00000412	protein_coding	F35E8.11	-0.0132909	0.995337
cdt-1	WBGene00000413	protein_coding	Y54E10A.15	0.106153	0.907085
cec-1	WBGene00000414	protein_coding	ZK1236.2	-0.148571	0.548618
ced-1	WBGene00000415	protein_coding	Y47H9C.4	0.22261	0.27339
ced-2	WBGene00000416	protein_coding	Y41D4B.13	0.37079	0.213171
ced-3	WBGene00000417	protein_coding	C48D1.2	0.749736	0.0794744
ced-4	WBGene00000418	protein_coding	C35D10.9	0.112124	0.766543
ced-5	WBGene00000419	protein_coding	C02F4.1	0.0672818	0.816611
ced-6	WBGene00000420	protein_coding	F56D2.7	0.253024	0.295247
ced-7	WBGene00000421	protein_coding	C48B4.4	0.261677	0.148949
ced-8	WBGene00000422	protein_coding	F08F1.5	0.262506	0.752328
ced-9	WBGene00000423	protein_coding	T07C4.8	0.18225	0.571884
ced-10	WBGene00000424	protein_coding	C09G12.8	0.071128	0.815971
ced-11	WBGene00000425	protein_coding	ZK512.3	-0.088731	0.902086
ced-12	WBGene00000426	protein_coding	Y106G6E.5	0.0472482	0.884856
ced-13	WBGene00000427	protein_coding	R09F10.9	0.156808	0.7764
ceh-1	WBGene00000428	protein_coding	F16H11.4	0.00219826	0.999496
ceh-2	WBGene00000429	protein_coding	C27A12.5	-0.741353	0.0522886
ceh-5	WBGene00000430	protein_coding	C16C2.1	0.146876	0.887193
ceh-6	WBGene00000431	protein_coding	K02B12.1	-0.20666	0.59103
ceh-7	WBGene00000432	protein_coding	C34C6.8	-0.00434562	0.999143
ceh-8	WBGene00000433	protein_coding	ZK265.4	0.101687	0.89058
ceh-9	WBGene00000434	protein_coding	Y65B4BR.9	0.0184614	0.992779
ceh-10	WBGene00000435	protein_coding	W03A3.1	-0.203612	0.700801
ceh-12	WBGene00000436	protein_coding	F33D11.4	0.21879	0.74365
ceh-13	WBGene00000437	protein_coding	R13A5.5	0.0644761	0.929741
ceh-14	WBGene00000438	protein_coding	F46C8.5	-0.300458	0.379143
ceh-16	WBGene00000439	protein_coding	C13G5.1	-0.113795	0.837629
ceh-17	WBGene00000440	protein_coding	D1007.1	0.212119	0.765601
ceh-18	WBGene00000441	protein_coding	ZC64.3	-0.140408	0.619788
ceh-19	WBGene00000442	protein_coding	F20D12.6	-0.470652	0.203375
ceh-20	WBGene00000443	protein_coding	F31E3.1	-0.00165252	0.999143
ceh-21	WBGene00000444	protein_coding	T26C11.6	0.0466249	0.94439
ceh-22	WBGene00000445	protein_coding	F29F11.5	-0.58044	0.138709
ceh-23	WBGene00000446	protein_coding	ZK652.5	-0.0449637	0.960382
ceh-24	WBGene00000447	protein_coding	F55B12.1	-0.0627998	0.949194
pros-1	WBGene00000448	protein_coding	K12H4.1	-0.0938146	0.834736
ceh-27	WBGene00000449	protein_coding	F46F3.1	-0.196814	0.719447
ceh-28	WBGene00000450	protein_coding	K03A11.3	-0.125446	0.855438
ceh-30	WBGene00000451	protein_coding	C33D12.7	0.0190456	0.988107
ceh-31	WBGene00000452	protein_coding	C33D12.1	-0.153226	0.804447
ceh-32	WBGene00000453	protein_coding	W05E10.3	-0.376343	0.298799
ceh-33	WBGene00000454	protein_coding	C10G8.7	-0.225078	0.730979
ceh-34	WBGene00000455	protein_coding	C10G8.6	-0.4148	0.364666
ceh-36	WBGene00000457	protein_coding	C37E2.4	0.313774	0.635606
ceh-37	WBGene00000458	protein_coding	C37E2.5	0.310819	0.556661
ceh-38	WBGene00000459	protein_coding	F22D3.1	0.131104	0.637828
ceh-39	WBGene00000460	protein_coding	T26C11.7	0.0332514	0.963114
ceh-40	WBGene00000461	protein_coding	F17A2.5	0.0782137	0.946858
ceh-41	WBGene00000462	protein_coding	T26C11.5	-0.0333071	0.955497
ceh-43	WBGene00000463	protein_coding	C28A5.4	-0.226799	0.611894
ceh-44	WBGene00000464	protein_coding	Y54F10AM.4	0.0810304	0.84359
cpg-1	WBGene00000465	protein_coding	C07G2.1	1.42132	6.95942e-05
cel-1	WBGene00000466	protein_coding	C03D6.3	0.359159	0.137783
cep-1	WBGene00000467	protein_coding	F52B5.5	0.0871422	0.92183
ces-1	WBGene00000468	protein_coding	F43G9.11	0.311917	0.684631
ces-2	WBGene00000469	protein_coding	ZK909.4	-0.262321	0.717187
cey-1	WBGene00000472	protein_coding	F33A8.3	0.138362	0.663625
cey-2	WBGene00000473	protein_coding	F46F11.2	1.43342	5.18103e-05
cey-3	WBGene00000474	protein_coding	M01E11.5	1.25426	0.000739527
cey-4	WBGene00000475	protein_coding	Y39A1C.3	-0.00810397	0.996663
cfi-1	WBGene00000476	protein_coding	T23D8.8	-0.386174	0.173214
cft-1	WBGene00000477	protein_coding	C18C4.2	0.301078	0.596336
cfz-2	WBGene00000478	protein_coding	F27E11.3	0.155215	0.798455
cgh-1	WBGene00000479	protein_coding	C07H6.5	0.400578	0.320351
cgp-1	WBGene00000480	protein_coding	Y38C9A.2	0.389477	0.0698234
cha-1	WBGene00000481	protein_coding	ZC416.8	0.0540129	0.945031
chd-3	WBGene00000482	protein_coding	T14G8.1	-0.1514	0.590474
che-1	WBGene00000483	protein_coding	C55B7.12	-0.0761646	0.948124
che-2	WBGene00000484	protein_coding	F38G1.1	0.0119658	0.995981
che-3	WBGene00000485	protein_coding	F18C12.1	0.366521	0.318877
che-6	WBGene00000487	protein_coding	C23H5.7	0.316559	0.616168
che-7	WBGene00000488	protein_coding	F26D11.10	0.0931351	0.870885
che-11	WBGene00000490	protein_coding	C27A7.4	-0.0440344	0.956674
che-12	WBGene00000491	protein_coding	B0024.8	0.171442	0.694198
che-13	WBGene00000492	protein_coding	F59C6.7	-0.172221	0.782607
che-14	WBGene00000493	protein_coding	F56H1.1	-0.274693	0.625479
chs-1	WBGene00000496	protein_coding	T25G3.2	1.02336	0.0161698
chs-2	WBGene00000497	protein_coding	F48A11.1	0.659048	0.101284
chk-1	WBGene00000498	protein_coding	Y39H10A.7	0.422525	0.31487
chk-2	WBGene00000499	protein_coding	Y60A3A.12	0.181043	0.679144
chn-1	WBGene00000500	protein_coding	T09B4.10	-0.00766009	0.991616
cho-1	WBGene00000501	protein_coding	C48D1.3	0.145796	0.818913
chp-1	WBGene00000502	protein_coding	Y110A7A.13	0.21611	0.405377
cht-1	WBGene00000503	protein_coding	C04F6.3	0.583815	0.282624
cic-1	WBGene00000506	protein_coding	H14E04.5	0.0969217	0.833381
cit-1.1	WBGene00000507	protein_coding	F44B9.4	0.0755155	0.886719
cit-1.2	WBGene00000508	protein_coding	F44B9.3	0.157316	0.615426
cka-1	WBGene00000509	protein_coding	C28D4.2	-0.0486157	0.881481
cka-2	WBGene00000510	protein_coding	C52B9.1	0.0892773	0.810789
ckb-1	WBGene00000511	protein_coding	B0285.8	-0.262019	0.428691
ckb-2	WBGene00000512	protein_coding	B0285.9	-0.313778	0.158571
ckb-3	WBGene00000513	protein_coding	B0285.10	-0.144026	0.891304
ckb-4	WBGene00000514	protein_coding	F22F7.5	-0.0515065	0.929353
ckc-1	WBGene00000515	protein_coding	T27A10.3	-0.512711	0.0133096
cki-1	WBGene00000516	protein_coding	T05A6.1	0.0391573	0.907258
cki-2	WBGene00000517	protein_coding	T05A6.2	0.118553	0.72523
ckk-1	WBGene00000518	protein_coding	C05H8.1	-0.111265	0.712407
cku-70	WBGene00000519	protein_coding	Y47D3A.4	0.0423849	0.943964
cku-80	WBGene00000520	protein_coding	R07E5.8	0.450214	0.124509
cky-1	WBGene00000521	protein_coding	C15C8.2	-0.116567	0.909752
clc-1	WBGene00000522	protein_coding	C09F12.1	0.814962	0.000118748
clc-2	WBGene00000523	protein_coding	C01C10.1	-0.0313992	0.963435
clc-3	WBGene00000524	protein_coding	ZK563.4	-0.0680182	0.918194
clc-4	WBGene00000525	protein_coding	T05A10.2	-0.115843	0.907337
clc-5	WBGene00000526	protein_coding	C01C10.4	-0.0563726	0.92183
cle-1	WBGene00000527	protein_coding	C36B1.1	0.0303725	0.938599
clh-1	WBGene00000528	protein_coding	T27D12.2	-0.185062	0.580658
clh-2	WBGene00000529	protein_coding	B0491.8	-0.0654786	0.916728
clh-3	WBGene00000530	protein_coding	E04F6.11	-0.245493	0.472689
clh-4	WBGene00000531	protein_coding	T06F4.2	0.144426	0.876515
clh-5	WBGene00000532	protein_coding	C07H4.2	0.0972074	0.695812
clh-6	WBGene00000533	protein_coding	R07B7.1	-0.123119	0.676401
cpi-2	WBGene00000534	protein_coding	R01B10.1	-0.126079	0.59103
cpi-1	WBGene00000535	protein_coding	K08B4.6	0.339492	0.487911
clk-1	WBGene00000536	protein_coding	ZC395.2	0.102547	0.817577
clk-2	WBGene00000537	protein_coding	C07H6.6	0.225506	0.473955
cln-3.1	WBGene00000539	protein_coding	F07B10.1	-0.336155	0.582132
cln-3.2	WBGene00000540	protein_coding	C01G8.2	-0.247997	0.339258
cln-3.3	WBGene00000541	protein_coding	ZC190.1	-0.651841	0.0378952
clp-1	WBGene00000542	protein_coding	C06G4.2	-0.186047	0.481202
clp-2	WBGene00000543	protein_coding	T04A8.16	0.169432	0.646765
clp-3	WBGene00000544	protein_coding	Y47H10A.1	0.0789288	0.946014
clp-4	WBGene00000545	protein_coding	Y39A3CL.5	0.0145227	0.973416
clp-6	WBGene00000546	protein_coding	Y77E11A.10	-0.146616	0.887972
clp-7	WBGene00000547	protein_coding	Y77E11A.11	0.0570913	0.890559
clr-1	WBGene00000548	protein_coding	F56D1.4	0.0367937	0.887972
cls-2	WBGene00000549	protein_coding	R107.6	0.625262	0.0269247
clu-1	WBGene00000550	protein_coding	F55H2.6	-0.198277	0.44347
clx-1	WBGene00000551	protein_coding	C50F7.2	-1.18667	0.00152619
cmd-1	WBGene00000552	protein_coding	T21H3.3	-0.118021	0.814885
cmk-1	WBGene00000553	protein_coding	K07A9.2	0.222911	0.563329
cnb-1	WBGene00000554	protein_coding	F55C10.1	-0.198283	0.370364
cnc-1	WBGene00000555	protein_coding	R09B5.2	0	NA
cnc-2	WBGene00000556	protein_coding	R09B5.3	0.0679057	0.943964
cnc-3	WBGene00000557	protein_coding	R09B5.8	0.240776	0.730898
cnc-4	WBGene00000558	protein_coding	R09B5.9	0.136955	0.896244
cnc-5	WBGene00000559	protein_coding	R09B5.10	NA	NA
cnc-6	WBGene00000560	protein_coding	Y46E12A.1	0.447536	0.476147
cnd-1	WBGene00000561	protein_coding	C34E10.7	0.131557	0.896364
cng-1	WBGene00000562	protein_coding	F14H8.6	0.527055	0.242279
cng-3	WBGene00000563	protein_coding	F38E11.12	-0.519725	0.134892
cnk-1	WBGene00000564	protein_coding	R01H10.8	0.0750922	0.866581
cnt-1	WBGene00000565	protein_coding	Y17G7B.15	0.0363623	0.929883
cnt-2	WBGene00000566	protein_coding	Y39A1A.15	-0.0223852	0.967079
cnx-1	WBGene00000567	protein_coding	ZK632.6	0.196545	0.14633
cof-2	WBGene00000583	protein_coding	C48E7.5	0.229524	0.773226
cog-1	WBGene00000584	protein_coding	R03C1.3	-0.245445	0.407461
cogc-2	WBGene00000585	protein_coding	C06G3.10	0.159388	0.640841
coh-1	WBGene00000591	protein_coding	K08A8.3	0.101322	0.800447
coh-3	WBGene00000592	protein_coding	F08H9.1	0.320568	0.676077
col-2	WBGene00000593	protein_coding	W01B6.7	0.0561859	0.912166
col-3	WBGene00000594	protein_coding	T28C6.6	-0.202617	0.68551
col-7	WBGene00000596	protein_coding	C15A11.5	0.0465325	0.966941
col-8	WBGene00000597	protein_coding	F11H8.3	1.47353	2.24757e-05
col-9	WBGene00000598	protein_coding	F54B11.1	0.184859	0.700801
col-10	WBGene00000599	protein_coding	B0222.8	-0.221519	0.625642
col-12	WBGene00000601	protein_coding	F15H10.1	-0.124645	0.864026
col-13	WBGene00000602	protein_coding	F15H10.2	-0.14117	0.841787
col-14	WBGene00000603	protein_coding	C46A5.3	0.943989	0.0262064
col-17	WBGene00000606	protein_coding	F11G11.10	0.041982	0.808348
col-19	WBGene00000608	protein_coding	ZK1193.1	1.64097	1.25716e-10
col-20	WBGene00000609	protein_coding	F11G11.11	0.725644	7.30478e-05
col-33	WBGene00000610	protein_coding	F36A4.6	-0.00125212	NA
col-34	WBGene00000611	protein_coding	F36A4.10	0.00346362	0.999143
col-35	WBGene00000612	protein_coding	C15A11.1	-0.217571	0.807862
col-36	WBGene00000613	protein_coding	C27H5.5	-0.0990256	0.908018
col-37	WBGene00000614	protein_coding	ZK863.2	0.0483547	0.943964
col-38	WBGene00000615	protein_coding	F54C9.4	0.806913	0.069478
col-39	WBGene00000616	protein_coding	C09G5.4	0.1845	0.632288
col-40	WBGene00000617	protein_coding	T13B5.4	0	NA
col-41	WBGene00000618	protein_coding	T10B10.1	-0.200471	0.827076
col-43	WBGene00000620	protein_coding	ZC513.8	0.0118372	NA
col-44	WBGene00000621	protein_coding	F54B11.2	0.608509	0.256418
col-45	WBGene00000622	protein_coding	F53G12.7	0.0692471	0.952814
col-46	WBGene00000623	protein_coding	Y18H1A.13	-0.278034	0.604371
col-47	WBGene00000624	protein_coding	Y18H1A.12	0.276358	0.710999
col-48	WBGene00000625	protein_coding	Y54E10BL.2	0.360399	0.523438
col-49	WBGene00000626	protein_coding	K09H9.3	-0.0216968	0.989005
col-50	WBGene00000627	protein_coding	T28F2.6	0.287018	0.469606
col-51	WBGene00000628	protein_coding	T28F2.8	0.62624	0.193554
col-52	WBGene00000629	protein_coding	D1007.2	0.0539541	0.961014
col-53	WBGene00000630	protein_coding	M01A12.1	-0.241668	0.686678
col-54	WBGene00000631	protein_coding	F33D11.3	0.324914	0.571282
col-55	WBGene00000632	protein_coding	T05E7.2	0.296368	0.473798
col-56	WBGene00000633	protein_coding	T08B2.2	-0.0857655	0.897756
col-58	WBGene00000634	protein_coding	F26B1.4	0.0870764	0.940984
col-60	WBGene00000636	protein_coding	F22D6.10	-0.388935	0.571051
col-61	WBGene00000637	protein_coding	C01H6.1	0.00905133	0.998955
col-62	WBGene00000638	protein_coding	C15A11.6	0.240396	0.775757
col-63	WBGene00000639	protein_coding	ZK265.2	0.58108	0.183822
col-64	WBGene00000640	protein_coding	F52F12.2	0.344242	0.616233
col-65	WBGene00000641	protein_coding	K08C9.4	0.953709	0.0050318
col-68	WBGene00000644	protein_coding	C50D2.4	0.249142	0.766044
col-69	WBGene00000645	protein_coding	K01A2.7	-0.701013	0.140973
col-70	WBGene00000646	protein_coding	H17B01.2	-0.144959	0.833726
col-71	WBGene00000647	protein_coding	Y49F6B.10	0.171696	0.852371
col-72	WBGene00000648	protein_coding	W09G10.1	-0.401812	0.357241
col-73	WBGene00000649	protein_coding	F11G11.12	0.4104	0.298031
col-74	WBGene00000650	protein_coding	ZK1248.2	0.505336	0.376374
col-75	WBGene00000651	protein_coding	K03H9.2	0.0791214	0.879877
col-76	WBGene00000652	protein_coding	M110.1	-0.903139	0.0101305
col-77	WBGene00000653	protein_coding	M195.1	0.231311	0.796132
col-78	WBGene00000654	protein_coding	W07A12.5	-0.114737	0.914921
col-79	WBGene00000655	protein_coding	C09G5.3	-0.393591	0.482417
col-80	WBGene00000656	protein_coding	C09G5.5	0.657375	0.0522791
col-81	WBGene00000657	protein_coding	F38A3.1	1.6351	4.10929e-06
col-83	WBGene00000658	protein_coding	F33A8.9	0.21449	0.811186
col-84	WBGene00000659	protein_coding	K12D12.3	0.140582	0.889348
col-85	WBGene00000660	protein_coding	T21B4.2	-0.000722514	0.999665
col-86	WBGene00000661	protein_coding	Y81G3A.5	0.090587	0.939064
col-87	WBGene00000662	protein_coding	Y39G8C.4	-0.0968079	0.932876
col-88	WBGene00000663	protein_coding	W05G11.3	0.214677	0.776689
col-89	WBGene00000664	protein_coding	F17C8.2	-0.119783	0.891463
col-90	WBGene00000665	protein_coding	C29E4.1	-0.366161	0.330982
col-91	WBGene00000666	protein_coding	F09G8.6	-0.303843	0.265917
col-92	WBGene00000667	protein_coding	W05B2.6	0.0618966	0.909553
col-93	WBGene00000668	protein_coding	W05B2.5	0.0534267	0.927205
col-94	WBGene00000669	protein_coding	W05B2.1	0.0688611	0.892524
col-95	WBGene00000670	protein_coding	Y41C4A.16	1.00263	0.00121466
col-96	WBGene00000671	protein_coding	Y41C4A.19	0.26829	0.727821
col-97	WBGene00000672	protein_coding	ZK1010.7	1.33955	0.000508094
col-98	WBGene00000673	protein_coding	F14F7.1	0.346529	0.61827
col-99	WBGene00000674	protein_coding	F29C4.8	0.203961	0.702026
col-101	WBGene00000675	protein_coding	K02D7.3	0.695781	0.148492
col-102	WBGene00000676	protein_coding	C18H7.3	0.0866	0.882296
col-103	WBGene00000677	protein_coding	F56B3.1	0.374005	0.570152
col-104	WBGene00000678	protein_coding	F58F6.1	0.337101	0.591223
col-105	WBGene00000679	protein_coding	F58F6.2	-0.186183	0.84575
col-106	WBGene00000680	protein_coding	Y77E11A.15	1.7693	1.18412e-09
col-107	WBGene00000681	protein_coding	C34H4.4	-0.101769	0.884405
col-108	WBGene00000682	protein_coding	Y41D4A.2	1.22181	0.00176689
col-109	WBGene00000683	protein_coding	Y38C1BA.3	0.747996	0.130879
col-110	WBGene00000684	protein_coding	F19C7.7	-0.439431	0.288162
col-111	WBGene00000685	protein_coding	F29B9.9	0.311197	0.605654
col-113	WBGene00000687	protein_coding	C34D4.15	-0.0984024	0.922046
col-114	WBGene00000688	protein_coding	D2024.8	-0.0117903	0.996985
col-115	WBGene00000689	protein_coding	Y42H9B.1	0.319562	0.676077
col-116	WBGene00000690	protein_coding	F17E9.1	0.115976	0.826065
col-117	WBGene00000691	protein_coding	T28C6.4	-0.204572	0.686984
col-118	WBGene00000692	protein_coding	T11B7.3	-0.110195	0.858238
col-119	WBGene00000693	protein_coding	C53B4.5	1.39537	2.60584e-05
col-120	WBGene00000694	protein_coding	Y11D7A.11	0.46189	0.463458
col-121	WBGene00000695	protein_coding	F56D5.1	0.289359	0.700967
col-122	WBGene00000696	protein_coding	T05A1.2	1.61188	1.98873e-08
col-123	WBGene00000697	protein_coding	W08D2.6	0.0703212	0.918194
col-124	WBGene00000698	protein_coding	C24F3.6	1.57944	9.0333e-07
col-125	WBGene00000699	protein_coding	C29F4.1	-0.554971	0.187132
col-126	WBGene00000700	protein_coding	F54D1.2	-0.560254	0.32609
col-127	WBGene00000701	protein_coding	F54D1.3	0.74203	0.1337
col-128	WBGene00000702	protein_coding	F12F6.9	0.074048	NA
col-129	WBGene00000703	protein_coding	M18.1	1.29259	0.00109505
col-130	WBGene00000704	protein_coding	F08G5.4	-0.0308134	0.97112
col-131	WBGene00000705	protein_coding	C39E9.3	-0.0284584	0.950781
col-132	WBGene00000706	protein_coding	C39E9.9	0.262006	0.68233
col-133	WBGene00000707	protein_coding	F52B11.4	0.171224	0.820819
col-135	WBGene00000708	protein_coding	M199.5	0.476891	0.0016942
col-137	WBGene00000710	protein_coding	Y51H4A.9	0.10154	0.89854
col-138	WBGene00000711	protein_coding	C52D10.13	0.437301	0.254594
col-139	WBGene00000712	protein_coding	F41F3.4	1.96622	8.31403e-11
col-140	WBGene00000713	protein_coding	F26F12.1	1.1063	9.34787e-07
col-141	WBGene00000714	protein_coding	T15B7.5	0.383395	0.549637
col-142	WBGene00000715	protein_coding	T15B7.4	0.750756	0.12982
col-143	WBGene00000716	protein_coding	T15B7.3	1.35336	5.18231e-07
col-144	WBGene00000717	protein_coding	B0222.6	-0.232894	0.583483
col-145	WBGene00000718	protein_coding	B0222.7	-0.31468	0.433683
col-146	WBGene00000719	protein_coding	T06E4.6	0.0569643	0.91842
col-147	WBGene00000720	protein_coding	T06E4.4	-0.0533483	0.928391
col-148	WBGene00000721	protein_coding	C12D8.8	-0.00342362	0.999143
col-149	WBGene00000722	protein_coding	B0024.1	0.206501	0.825281
col-150	WBGene00000723	protein_coding	B0024.2	0.338169	0.532431
col-151	WBGene00000724	protein_coding	AC3.6	-0.112137	0.909752
col-152	WBGene00000725	protein_coding	F32G8.5	-0.102578	0.924261
col-153	WBGene00000726	protein_coding	F17C11.3	0.191918	0.806152
col-154	WBGene00000727	protein_coding	F55C10.2	-0.336106	0.449731
col-155	WBGene00000728	protein_coding	F55C10.3	-0.281755	0.504127
col-156	WBGene00000729	protein_coding	F57B7.3	-0.00431557	0.999135
col-157	WBGene00000730	protein_coding	T11F9.9	0.143055	0.890138
col-158	WBGene00000731	protein_coding	D2023.7	0.143426	0.834047
col-159	WBGene00000732	protein_coding	F57B1.3	0.310815	0.379964
col-160	WBGene00000733	protein_coding	F57B1.4	0.217525	0.622109
col-161	WBGene00000734	protein_coding	C50B6.4	0.140268	0.878348
col-162	WBGene00000735	protein_coding	Y2H9A.3	0.262437	0.431261
col-163	WBGene00000736	protein_coding	F46B3.17	-0.220914	0.783648
col-164	WBGene00000737	protein_coding	T21D9.1	0.234942	0.640841
col-165	WBGene00000738	protein_coding	F14H12.1	-0.0707922	0.95052
col-166	WBGene00000739	protein_coding	T07H6.3	-0.162124	0.737732
col-167	WBGene00000740	protein_coding	T10E10.2	-0.241089	0.675135
col-168	WBGene00000741	protein_coding	T10E10.1	-0.243884	0.657611
col-169	WBGene00000742	protein_coding	T10E10.5	-0.269748	0.652587
col-170	WBGene00000743	protein_coding	T10E10.6	-0.274527	0.619788
col-171	WBGene00000744	protein_coding	T10E10.7	0.117098	0.870885
col-172	WBGene00000745	protein_coding	F38B6.5	-0.0885901	0.937228
col-173	WBGene00000746	protein_coding	F41C6.5	0.234167	0.588163
col-174	WBGene00000747	protein_coding	F46C8.2	-0.318114	0.661834
col-175	WBGene00000748	protein_coding	C35B8.1	0.201885	0.774661
col-176	WBGene00000749	protein_coding	ZC373.7	0.499711	0.402387
col-177	WBGene00000750	protein_coding	F59F3.2	-0.202449	0.762303
col-178	WBGene00000751	protein_coding	C34F6.2	1.89176	2.13284e-12
col-179	WBGene00000752	protein_coding	C34F6.3	1.06384	4.29624e-06
col-180	WBGene00000753	protein_coding	C44C10.1	-0.320541	0.595617
col-181	WBGene00000754	protein_coding	W03G11.1	1.82228	5.71586e-10
col-182	WBGene00000755	protein_coding	R09A8.4	0.217964	0.737436
col-183	WBGene00000756	protein_coding	F02D10.1	0.134216	0.722721
col-184	WBGene00000757	protein_coding	F15A2.1	1.56043	4.07234e-09
col-185	WBGene00000758	protein_coding	H06A10.2	0.0976062	0.90863
col-186	WBGene00000759	protein_coding	E03G2.4	-0.227052	0.781779
col-187	WBGene00000760	protein_coding	C30F2.1	-0.266585	0.741936
coq-1	WBGene00000761	protein_coding	C24A11.9	-0.303291	0.0563498
coq-2	WBGene00000762	protein_coding	F57B9.4	-0.106969	0.773468
coq-3	WBGene00000763	protein_coding	Y57G11C.11	-0.0437401	0.90765
coq-4	WBGene00000764	protein_coding	T03F1.2	-0.193837	0.558264
coq-5	WBGene00000765	protein_coding	ZK652.9	0.1263	0.815971
coq-6	WBGene00000766	protein_coding	K07B1.2	-0.0936787	0.732895
coq-8	WBGene00000767	protein_coding	C35D10.4	-0.0927821	0.816239
cor-1	WBGene00000768	protein_coding	R01H10.3	0.0810214	0.851785
cpb-1	WBGene00000770	protein_coding	C40H1.1	0.862083	0.0627682
cpb-2	WBGene00000771	protein_coding	C30B5.3	0.389159	0.505297
cpb-3	WBGene00000772	protein_coding	B0414.5	1.20668	0.00277054
cpf-1	WBGene00000773	protein_coding	F28C6.3	0.474062	0.128881
cpf-2	WBGene00000774	protein_coding	F56A8.6	0.310164	0.223857
cpin-1	WBGene00000775	protein_coding	F38E11.3	-0.134083	0.85346
cpl-1	WBGene00000776	protein_coding	T03E6.7	0.254065	0.539952
cpn-1	WBGene00000777	protein_coding	F43G9.9	0.633632	0.0240615
cpn-2	WBGene00000778	protein_coding	D1069.2	0.183793	0.834518
cpn-3	WBGene00000779	protein_coding	F28H1.2	-0.239633	0.480461
cpn-4	WBGene00000780	protein_coding	F49D11.8	-0.138182	0.862741
cpr-1	WBGene00000781	protein_coding	C52E4.1	-0.659967	0.20334
cpr-2	WBGene00000782	protein_coding	F36D3.9	0.481434	0.318094
cpr-3	WBGene00000783	protein_coding	T10H4.12	2.01851	3.41044e-42
cpr-4	WBGene00000784	protein_coding	F44C4.3	0.363908	0.595822
cpr-5	WBGene00000785	protein_coding	W07B8.5	-0.165037	0.869284
cpr-6	WBGene00000786	protein_coding	C25B8.3	-0.810698	0.00352569
cps-6	WBGene00000787	protein_coding	C41D11.8	0.0772472	0.891835
cpz-1	WBGene00000788	protein_coding	F32B5.8	0.244422	0.622209
cpz-2	WBGene00000789	protein_coding	M04G12.2	-0.525033	0.0476229
crb-1	WBGene00000792	protein_coding	F11C7.4	0.0651885	0.920691
crh-1	WBGene00000793	protein_coding	Y41C4A.4	-0.116342	0.728867
crn-1	WBGene00000794	protein_coding	Y47G6A.8	0.365268	0.514416
crn-2	WBGene00000795	protein_coding	CD4.2	0.280688	0.300851
crn-3	WBGene00000796	protein_coding	C14A4.4	0.191942	0.464656
crn-4	WBGene00000797	protein_coding	AH9.2	1.05099	0.00688863
crn-5	WBGene00000798	protein_coding	C14A4.5	0.211802	0.61827
crn-6	WBGene00000799	protein_coding	K04H4.6	-0.332188	0.441959
cars-1	WBGene00000800	protein_coding	Y23H5A.7	0.353325	0.0653577
crt-1	WBGene00000802	protein_coding	Y38A10A.5	-0.0698523	0.898453
csb-1	WBGene00000803	protein_coding	F53H4.1	0.170558	0.671207
csc-1	WBGene00000804	protein_coding	Y48E1B.12	0.511363	0.389539
csk-1	WBGene00000812	protein_coding	Y48G1C.2	0.174468	0.355728
csn-1	WBGene00000813	protein_coding	Y59A8A.1	0.0759344	0.845046
csn-2	WBGene00000814	protein_coding	B0025.2	0.316092	0.138939
csn-3	WBGene00000815	protein_coding	Y38C1AA.2	0.0126448	0.980314
csn-4	WBGene00000816	protein_coding	Y55F3AM.15	0.280162	0.176358
csn-5	WBGene00000817	protein_coding	B0547.1	0.143589	0.719032
csn-6	WBGene00000818	protein_coding	Y67H2A.6	-0.0237489	0.956781
csp-1	WBGene00000819	protein_coding	Y48E1B.13	0.663514	0.203875
csp-2	WBGene00000820	protein_coding	Y73B6BL.7	-0.139905	0.79571
csp-3	WBGene00000821	protein_coding	Y47H9C.6	-0.00457589	0.999143
csq-1	WBGene00000822	protein_coding	F40E10.3	-0.206619	0.476549
ctb-1	WBGene00000829	protein_coding	MTCE.21	-0.659526	0.00305377
ctl-1	WBGene00000830	protein_coding	Y54G11A.6	-0.0824943	0.907442
ctl-2	WBGene00000831	protein_coding	Y54G11A.5	-0.608699	0.0404114
ctn-1	WBGene00000832	protein_coding	Y23H5A.5	0.0518723	0.926175
cts-1	WBGene00000833	protein_coding	T20G5.2	-0.479704	0.0390658
cua-1	WBGene00000834	protein_coding	Y76A2A.2	0.162594	0.549637
cuc-1	WBGene00000835	protein_coding	ZK652.11	-0.0943044	0.890738
cul-1	WBGene00000836	protein_coding	D2045.6	0.114747	0.590474
cul-2	WBGene00000837	protein_coding	ZK520.4	0.185243	0.409458
cul-3	WBGene00000838	protein_coding	Y108G3AL.1	0.273993	0.322313
cul-4	WBGene00000839	protein_coding	F45E12.3	0.0957197	0.804249
cul-5	WBGene00000840	protein_coding	ZK856.1	0.204988	0.294524
cul-6	WBGene00000841	protein_coding	K08E7.7	0.634127	0.0567518
cup-2	WBGene00000843	protein_coding	F25D7.1	0.225997	0.333699
cup-4	WBGene00000845	protein_coding	C02C2.3	0.106939	0.904993
cup-5	WBGene00000846	protein_coding	R13A5.1	0.0626572	0.886976
cut-1	WBGene00000851	protein_coding	C47G2.1	0.241779	0.506548
cut-6	WBGene00000853	protein_coding	M142.2	0.0956252	0.934512
cux-7	WBGene00000854	protein_coding	C07H6.8	0.292705	0.313988
cwn-1	WBGene00000857	protein_coding	K10B4.6	-0.235048	0.558242
cwn-2	WBGene00000858	protein_coding	W01B6.1	0.156425	0.72703
cwp-1	WBGene00000859	protein_coding	C37H5.10	0.0856201	0.822531
cwp-2	WBGene00000860	protein_coding	C37H5.11	0.08388	0.884953
cwp-3	WBGene00000861	protein_coding	C37H5.4	0.192841	0.604371
cwp-4	WBGene00000862	protein_coding	K11D12.1	0.0311207	0.96888
cya-1	WBGene00000863	protein_coding	ZK507.6	0.378486	0.273698
cya-2	WBGene00000864	protein_coding	F59H6.7	0.149985	0.87966
cyb-1	WBGene00000865	protein_coding	ZC168.4	1.2449	0.00176689
cyb-2.1	WBGene00000866	protein_coding	Y43E12A.1	1.22203	0.00232783
cyb-2.2	WBGene00000867	protein_coding	H31G24.4	1.32886	0.000656953
cyb-3	WBGene00000868	protein_coding	T06E6.2	1.08069	0.00724158
cyc-1	WBGene00000869	protein_coding	C54G4.8	-0.425007	0.00542189
cyd-1	WBGene00000870	protein_coding	Y38F1A.5	-0.14806	0.704886
cye-1	WBGene00000871	protein_coding	C37A2.4	0.412236	0.467643
cyk-1	WBGene00000872	protein_coding	F11H8.4	0.0407409	0.930186
cyk-3	WBGene00000874	protein_coding	ZK328.1	0.261986	0.103227
cyk-4	WBGene00000875	protein_coding	K08E3.6	0.546154	0.286785
cyl-1	WBGene00000876	protein_coding	C52E4.6	0.362059	0.119741
cyn-1	WBGene00000877	protein_coding	Y49A3A.5	-0.835939	2.00684e-06
cyn-2	WBGene00000878	protein_coding	ZK520.5	0.256265	0.7398
cyn-3	WBGene00000879	protein_coding	Y75B12B.5	-0.05338	0.85437
cyn-4	WBGene00000880	protein_coding	F59E10.2	0.30767	0.192694
cyn-5	WBGene00000881	protein_coding	F31C3.1	-0.296134	0.122672
cyn-6	WBGene00000882	protein_coding	F42G9.2	-0.261459	0.491666
cyn-7	WBGene00000883	protein_coding	Y75B12B.2	0.00754594	0.990045
cyn-8	WBGene00000884	protein_coding	D1009.2	0.0491425	0.928391
cyn-9	WBGene00000885	protein_coding	T27D1.1	0.411218	0.512706
cyn-10	WBGene00000886	protein_coding	B0252.4	0.478804	0.196951
cyn-11	WBGene00000887	protein_coding	T01B7.4	0.36699	0.186214
cyn-12	WBGene00000888	protein_coding	C34D4.12	-0.0668953	0.888665
cyn-13	WBGene00000889	protein_coding	Y116A8C.34	0.262251	0.267052
sig-7	WBGene00000890	protein_coding	F39H2.2	0.256554	0.378887
cyn-15	WBGene00000891	protein_coding	Y87G2A.6	0.402616	0.206193
cyn-16	WBGene00000892	protein_coding	Y17G7B.9	0.0203656	0.96888
cyn-17	WBGene00000893	protein_coding	ZC250.1	0.365625	0.607909
dab-1	WBGene00000894	protein_coding	M110.5	0.333127	0.0228031
dac-1	WBGene00000895	protein_coding	B0412.1	-0.083745	0.938599
dad-1	WBGene00000896	protein_coding	F57B10.10	0.246591	0.273699
daf-1	WBGene00000897	protein_coding	F29C4.1	-0.184877	0.602767
daf-2	WBGene00000898	protein_coding	Y55D5A.5	0.0230632	0.959128
daf-3	WBGene00000899	protein_coding	F25E2.5	-0.190502	0.405715
daf-4	WBGene00000900	protein_coding	C05D2.1	-0.145592	0.581317
daf-5	WBGene00000901	protein_coding	W01G7.1	0.292164	0.360493
daf-6	WBGene00000902	protein_coding	F31F6.5	0.0937048	0.915657
daf-7	WBGene00000903	protein_coding	B0412.2	0.451128	0.466325
daf-8	WBGene00000904	protein_coding	R05D11.1	-0.0105907	0.985044
daf-9	WBGene00000905	protein_coding	T13C5.1	0.335167	0.595319
daf-10	WBGene00000906	protein_coding	F23B2.4	0.346231	0.464373
daf-11	WBGene00000907	protein_coding	B0240.3	-0.0522653	0.953086
daf-12	WBGene00000908	protein_coding	F11A1.3	0.0106516	0.974356
daf-14	WBGene00000910	protein_coding	F01G10.8	0.0986158	0.746681
daf-15	WBGene00000911	protein_coding	C10C5.6	0.00704615	0.983855
daf-16	WBGene00000912	protein_coding	R13H8.1	0.297877	0.273429
daf-18	WBGene00000913	protein_coding	T07A9.6	0.6579	0.0653341
daf-19	WBGene00000914	protein_coding	F33H1.1	-0.075245	0.854992
daf-21	WBGene00000915	protein_coding	C47E8.5	0.675288	0.00302237
daf-25	WBGene00000917	protein_coding	Y48G1A.3	0.145769	0.72605
daf-28	WBGene00000920	protein_coding	Y116F11B.1	0.244911	0.757934
dao-2	WBGene00000928	protein_coding	M03A1.7	0.237398	0.664341
dao-3	WBGene00000929	protein_coding	K07E3.3	-0.85118	0.000257558
dao-4	WBGene00000930	protein_coding	ZC373.6	0.0704574	0.884245
dao-5	WBGene00000931	protein_coding	C25A1.10	0.125436	0.795771
dao-6	WBGene00000932	protein_coding	T05G5.12	0.935797	0.0290351
dap-3	WBGene00000933	protein_coding	C14A4.2	-0.489975	0.0173446
dat-1	WBGene00000934	protein_coding	T23G5.5	0.191417	0.806662
daz-1	WBGene00000935	protein_coding	F56D1.7	1.04179	0.0131514
dbl-1	WBGene00000936	protein_coding	T25F10.2	0.15371	0.6035
dbr-1	WBGene00000937	protein_coding	C55B7.8	0.137586	0.78397
dcp-66	WBGene00000938	protein_coding	C26C6.5	-0.0381639	0.917426
dcr-1	WBGene00000939	protein_coding	K12H4.8	0.249095	0.361482
dcs-1	WBGene00000940	protein_coding	Y113G7A.9	0.111165	0.82781
ddp-1	WBGene00000941	protein_coding	Y39A3CR.4	-0.553157	0.000313854
deb-1	WBGene00000942	protein_coding	ZC477.9	-0.228465	0.595617
deg-1	WBGene00000950	protein_coding	C47C12.6	0.136316	0.740473
deg-3	WBGene00000951	protein_coding	K03B8.9	0.0608572	0.934809
del-1	WBGene00000952	protein_coding	E02H4.1	-0.217898	0.712481
del-2	WBGene00000953	protein_coding	F58G6.6	0.413595	0.321001
des-2	WBGene00000955	protein_coding	T26H10.1	0.103209	0.842903
dgk-1	WBGene00000958	protein_coding	C09E10.2	0.180339	0.717533
dgk-2	WBGene00000959	protein_coding	F46H6.2	-0.302273	0.0396046
dgk-3	WBGene00000960	protein_coding	F54G8.2	0.310103	0.652587
dgn-1	WBGene00000961	protein_coding	T21B6.1	-0.0823176	0.855096
dhc-1	WBGene00000962	protein_coding	T21E12.4	0.313639	0.232734
dhp-1	WBGene00000963	protein_coding	R06C7.3	-0.104482	0.78171
dhp-2	WBGene00000964	protein_coding	C47E12.8	-0.371172	0.0674455
dhs-1	WBGene00000965	protein_coding	C01G8.3	0.0117371	0.989066
dhs-2	WBGene00000966	protein_coding	F55A12.4	-0.566679	0.10414
dhs-3	WBGene00000967	protein_coding	T02E1.5	-0.183362	0.682406
dhs-4	WBGene00000968	protein_coding	T05F1.10	-0.559241	0.0902902
dhs-5	WBGene00000969	protein_coding	F56D1.5	-0.239872	0.685288
dhs-6	WBGene00000970	protein_coding	C17G10.8	-0.537313	0.0342707
dhs-7	WBGene00000971	protein_coding	E04F6.7	-1.02938	0.000339308
dhs-8	WBGene00000972	protein_coding	K10H10.3	0.517411	0.379143
dhs-9	WBGene00000973	protein_coding	Y32H12A.3	-0.261262	0.442648
dhs-11	WBGene00000974	protein_coding	Y39A1A.11	0.680177	0.190032
dhs-12	WBGene00000975	protein_coding	K08F4.9	-0.304055	0.229793
dhs-13	WBGene00000976	protein_coding	F36H9.3	-0.150301	0.569954
dhs-14	WBGene00000977	protein_coding	R05D8.8	-0.81414	0.0205672
dhs-15	WBGene00000978	protein_coding	R05D8.10	0.243153	0.67431
dhs-16	WBGene00000979	protein_coding	C10F3.2	-0.103196	0.921379
dhs-17	WBGene00000980	protein_coding	F29G9.6	-0.0448664	0.922046
dhs-18	WBGene00000981	protein_coding	C45B11.3	-0.960569	0.00018148
dhs-19	WBGene00000982	protein_coding	T11F9.11	-0.239297	0.458922
dhs-20	WBGene00000983	protein_coding	F35B12.2	-0.356117	0.277664
dhs-21	WBGene00000984	protein_coding	R11D1.11	-0.227155	0.658966
dhs-22	WBGene00000985	protein_coding	C15H11.4	-0.0624604	0.882542
dhs-23	WBGene00000986	protein_coding	R08H2.1	-0.080677	0.943964
dhs-24	WBGene00000987	protein_coding	Y60A3A.10	0.00486547	0.995994
dhs-25	WBGene00000988	protein_coding	F09E10.3	-0.1156	0.833122
dhs-26	WBGene00000989	protein_coding	ZK816.5	-0.170604	0.864084
dhs-27	WBGene00000990	protein_coding	C04F6.5	0.0537198	0.952814
dhs-28	WBGene00000991	protein_coding	M03A8.1	-0.352137	0.0864615
dhs-29	WBGene00000992	protein_coding	F27D9.6	-0.180067	0.596336
dhs-30	WBGene00000993	protein_coding	T25G12.7	-0.159255	0.667448
dic-1	WBGene00000994	protein_coding	F08B4.1	0.435576	0.180802
die-1	WBGene00000995	protein_coding	C18D1.1	-0.0611971	0.913929
dif-1	WBGene00000996	protein_coding	F49E8.5	-0.0122998	0.989663
dig-1	WBGene00000998	protein_coding	K07E12.1	-0.00858963	0.994496
dim-1	WBGene00001000	protein_coding	C18A11.7	-0.214909	0.436233
dis-3	WBGene00001001	protein_coding	C04G2.6	0.128484	0.758583
div-1	WBGene00001002	protein_coding	R01H10.1	0.384362	0.40496
dlc-1	WBGene00001005	protein_coding	T26A5.9	-0.387491	5.44339e-05
dlg-1	WBGene00001006	protein_coding	C25F6.2	-0.181815	0.533967
dli-1	WBGene00001007	protein_coding	C39E9.14	0.336752	0.0798899
dlk-1	WBGene00001008	protein_coding	F33E2.2	0.0692588	0.8748
dna-2	WBGene00001016	protein_coding	F43G6.1	0.482351	0.415574
dnc-1	WBGene00001017	protein_coding	ZK593.5	0.190757	0.132653
dnc-2	WBGene00001018	protein_coding	C28H8.12	0.461958	0.017303
dnj-1	WBGene00001019	protein_coding	B0035.14	-0.00289257	0.998955
dnj-2	WBGene00001020	protein_coding	B0035.2	0.106236	0.875826
dnj-3	WBGene00001021	protein_coding	C01G10.12	-0.197964	0.781298
dnj-4	WBGene00001022	protein_coding	C01G8.4	0.126439	0.828706
dnj-5	WBGene00001023	protein_coding	C04A2.7	0.104545	0.728131
dnj-7	WBGene00001025	protein_coding	C55B6.2	0.167505	0.591223
dnj-8	WBGene00001026	protein_coding	C56C10.13	0.0259417	0.942828
dnj-9	WBGene00001027	protein_coding	F11G11.7	-0.0894367	0.697133
dnj-10	WBGene00001028	protein_coding	F22B7.5	-0.054568	0.915334
dnj-11	WBGene00001029	protein_coding	F38A5.13	0.316261	0.367039
dnj-12	WBGene00001030	protein_coding	F39B2.10	0.366703	0.0720657
dnj-13	WBGene00001031	protein_coding	F54D5.8	1.30043	0.000894708
dnj-14	WBGene00001032	protein_coding	K02G10.8	-0.0972797	0.688782
dnj-15	WBGene00001033	protein_coding	K08D10.2	-0.0427895	0.948938
dnj-16	WBGene00001034	protein_coding	R74.4	0.284505	0.10414
dnj-17	WBGene00001035	protein_coding	T03F6.2	-0.0746451	0.904409
dnj-18	WBGene00001036	protein_coding	T04A8.9	0.000591751	0.999827
dnj-19	WBGene00001037	protein_coding	T05C3.5	0.205601	0.568529
dnj-20	WBGene00001038	protein_coding	T15H9.7	0.125804	0.60704
dnj-21	WBGene00001039	protein_coding	T19B4.4	-0.407676	0.326788
dnj-22	WBGene00001040	protein_coding	T23B12.7	0.817121	0.0178697
dnj-23	WBGene00001041	protein_coding	T24H10.3	0.280324	0.37978
dnj-24	WBGene00001042	protein_coding	W03A5.7	-0.169043	0.471892
dnj-25	WBGene00001043	protein_coding	W07A8.3	0.0510182	0.845087
dnj-26	WBGene00001044	protein_coding	Y39C12A.8	0.378552	0.590965
dnj-27	WBGene00001045	protein_coding	Y47H9C.5	0.166095	0.720736
dnj-28	WBGene00001046	protein_coding	Y54E10BL.4	0.0964322	0.874607
dnj-29	WBGene00001047	protein_coding	Y63D3A.6	0.111808	0.621439
dnj-30	WBGene00001048	protein_coding	Y71F9B.16	0.0622384	0.928873
dog-1	WBGene00001049	protein_coding	F33H2.1	0.211417	0.729044
dom-3	WBGene00001050	protein_coding	F54C1.2	0.0167699	0.982708
cks-1	WBGene00001051	protein_coding	C09G4.3	0.260986	0.656959
dop-1	WBGene00001052	protein_coding	F15A8.5	-0.251278	0.44232
dop-2	WBGene00001053	protein_coding	K09G1.4	0.125488	0.867304
dpf-1	WBGene00001054	protein_coding	T23F1.7	-0.226661	0.405377
dpf-2	WBGene00001055	protein_coding	C27C12.7	-0.224584	0.554239
dpf-3	WBGene00001056	protein_coding	K02F2.1	0.116116	0.685459
dpf-4	WBGene00001057	protein_coding	F01F1.5	-0.0790294	0.799875
dpf-5	WBGene00001058	protein_coding	R11E3.8	0.283292	0.158571
dpf-6	WBGene00001059	protein_coding	F44B9.1	0.0982197	0.909459
dpf-7	WBGene00001060	protein_coding	R11E3.7	0.151774	0.653392
dpl-1	WBGene00001061	protein_coding	T23G7.1	0.197574	0.657874
dpr-1	WBGene00001062	protein_coding	R10D12.2	-0.0662301	0.953765
dpy-1	WBGene00001063	protein_coding	M01E10.2	0.361801	0.604839
dpy-2	WBGene00001064	protein_coding	T14B4.6	-0.0640539	0.955112
dpy-3	WBGene00001065	protein_coding	EGAP7.1	-0.133057	0.891369
dpy-4	WBGene00001066	protein_coding	Y41E3.2	-0.181905	0.845716
dpy-5	WBGene00001067	protein_coding	F27C1.8	0.278381	0.54204
dpy-6	WBGene00001068	protein_coding	F16F9.2	-0.14037	0.773693
dpy-7	WBGene00001069	protein_coding	F46C8.6	-0.207831	0.809827
dpy-8	WBGene00001070	protein_coding	C31H2.2	-0.224824	0.800121
dpy-9	WBGene00001071	protein_coding	T21D12.2	0.0591363	0.956781
dpy-10	WBGene00001072	protein_coding	T14B4.7	0.671286	0.158267
dpy-11	WBGene00001073	protein_coding	F46E10.9	0.126703	0.649192
dpy-13	WBGene00001074	protein_coding	F30B5.1	0.431939	0.418573
dpy-14	WBGene00001075	protein_coding	H27M09.4	0.343817	0.59892
dpy-17	WBGene00001076	protein_coding	F54D8.1	0.207965	0.796078
dpy-18	WBGene00001077	protein_coding	Y47D3B.10	0.403427	0.400473
dpy-19	WBGene00001078	protein_coding	F22B7.10	0.227341	0.562687
dpy-20	WBGene00001079	protein_coding	T22B3.1	-0.618959	0.250711
dpy-21	WBGene00001080	protein_coding	Y59A8B.1	0.199684	0.577622
dpy-22	WBGene00001081	protein_coding	F47A4.2	-0.0617894	0.830374
dpy-23	WBGene00001082	protein_coding	R160.1	0.0869528	0.866188
dpy-26	WBGene00001085	protein_coding	C25G4.5	0.17676	0.4107
dpy-27	WBGene00001086	protein_coding	R13G10.1	-0.110375	0.605394
dpy-28	WBGene00001087	protein_coding	Y39A1B.3	0.0690687	0.751184
dpy-30	WBGene00001088	protein_coding	ZK863.6	0.21307	0.263348
dre-1	WBGene00001089	protein_coding	K04A8.6	-0.0667404	0.803987
drh-1	WBGene00001090	protein_coding	F15B10.2	0.242826	0.576035
dro-1	WBGene00001092	protein_coding	F53A2.5	0.272943	0.590474
drp-1	WBGene00001093	protein_coding	T12E12.4	0.13422	0.580701
dars-1	WBGene00001094	protein_coding	B0464.1	0.0349899	0.917456
dars-2	WBGene00001095	protein_coding	F10C2.6	-0.461589	0.234912
dsc-1	WBGene00001096	protein_coding	C18B12.3	-0.138998	0.875239
dsc-4	WBGene00001099	protein_coding	K02D7.4	-0.631075	0.013037
dsh-1	WBGene00001101	protein_coding	C34F11.9	-0.255419	0.0313633
dsh-2	WBGene00001102	protein_coding	C27A2.6	0.245474	0.691321
dsl-1	WBGene00001103	protein_coding	W09G12.4	0.0445403	0.967002
dsl-2	WBGene00001104	protein_coding	W09G12.1	0.0523593	0.961887
dsl-3	WBGene00001105	protein_coding	Y41D4B.10	0.243715	0.77763
dsl-4	WBGene00001106	protein_coding	F16B12.2	0.198368	0.826096
dsl-5	WBGene00001107	protein_coding	F58B3.8	-0.111848	0.913906
dsl-6	WBGene00001108	protein_coding	H02I12.4	0.0178597	0.992839
dsl-7	WBGene00001109	protein_coding	F15B9.9	-0.509404	0.0586782
duo-1	WBGene00001110	protein_coding	F38B7.5	0.315594	0.63905
duo-3	WBGene00001112	protein_coding	Y106G6H.12	0.386567	0.174426
dur-1	WBGene00001113	protein_coding	F25H8.5	-0.0317076	0.954082
dyb-1	WBGene00001115	protein_coding	F47G6.1	-0.0689496	0.888318
dyc-1	WBGene00001116	protein_coding	C33G3.1	-0.079411	0.852112
dyf-1	WBGene00001117	protein_coding	F54C1.5	0.133774	0.829404
dyf-2	WBGene00001118	protein_coding	ZK520.3	0.220525	0.424285
dyf-3	WBGene00001119	protein_coding	C04C3.5	0.253334	0.685212
dyf-5	WBGene00001121	protein_coding	M04C9.5	-0.0453143	0.953086
dyf-6	WBGene00001122	protein_coding	F46F6.4	-0.152902	0.759979
dyf-7	WBGene00001123	protein_coding	C43C3.3	0.0904337	0.93754
dyf-11	WBGene00001127	protein_coding	C02H7.1	-0.000580886	1
dyf-13	WBGene00001129	protein_coding	C27H5.7	0.226684	0.67771
dyn-1	WBGene00001130	protein_coding	C02C6.1	0.198159	0.740796
dys-1	WBGene00001131	protein_coding	F15D3.1	0.073935	0.88684
alp-1	WBGene00001132	protein_coding	T11B7.4	-0.18307	0.770008
eat-2	WBGene00001133	protein_coding	Y48B6A.4	0.103067	0.927667
eat-3	WBGene00001134	protein_coding	D2013.5	0.244477	0.130145
eat-4	WBGene00001135	protein_coding	ZK512.6	0.0818402	0.892524
eat-5	WBGene00001136	protein_coding	F13G3.8	-0.00950888	0.998437
eat-6	WBGene00001137	protein_coding	B0365.3	-0.0800445	0.872846
eat-16	WBGene00001145	protein_coding	C16C2.2	0.0568346	0.897633
eat-18	WBGene00001147	protein_coding	Y105E8A.7	0.0590201	0.914912
eat-20	WBGene00001148	protein_coding	H30A04.1	0.116057	0.87849
bcat-1	WBGene00001149	protein_coding	K02A4.1	0.0197525	0.963758
ech-1	WBGene00001150	protein_coding	C29F3.1	-0.957415	0.00903498
ech-2	WBGene00001151	protein_coding	F38H4.8	-0.118818	0.726092
ech-3	WBGene00001152	protein_coding	F43H9.1	-0.156777	0.719483
ech-4	WBGene00001153	protein_coding	R06F6.9	-0.253026	0.428998
ech-5	WBGene00001154	protein_coding	F56B3.5	-0.434601	0.0495175
ech-6	WBGene00001155	protein_coding	T05G5.6	-0.762925	2.90637e-05
ech-7	WBGene00001156	protein_coding	Y105E8A.4	-0.872042	0.00459814
ech-8	WBGene00001157	protein_coding	F01G10.2	-0.615176	0.0396348
ech-9	WBGene00001158	protein_coding	F01G10.3	1.86506	1.27284e-08
eff-1	WBGene00001159	protein_coding	C26D10.5	-0.271509	0.49231
efk-1	WBGene00001160	protein_coding	F42A10.4	0.348429	0.330415
efl-1	WBGene00001161	protein_coding	Y102A5C.18	0.252196	0.514488
efl-2	WBGene00001162	protein_coding	Y48C3A.17	0.000847891	0.999496
efn-2	WBGene00001163	protein_coding	C43F9.8	-0.185372	0.695812
efn-3	WBGene00001164	protein_coding	F15A2.5	0.414137	0.384738
efn-4	WBGene00001165	protein_coding	F56A11.3	0.00743276	0.997209
eftu-2	WBGene00001166	protein_coding	ZK328.2	0.744795	0.00713038
eef-2	WBGene00001167	protein_coding	F25H5.4	0.0268557	0.951996
eef-1A.1	WBGene00001168	protein_coding	F31E3.5	0.0787198	0.891397
eef-1A.2	WBGene00001169	protein_coding	R03G5.1	0.208308	0.522599
egl-1	WBGene00001170	protein_coding	F23B12.9	0.279196	0.683011
egl-2	WBGene00001171	protein_coding	F16B3.1	0.157146	0.693417
egl-3	WBGene00001172	protein_coding	C51E3.7	0.260733	0.643764
egl-4	WBGene00001173	protein_coding	F55A8.2	-0.0455536	0.901578
egl-5	WBGene00001174	protein_coding	C08C3.1	-0.356666	0.356516
egl-6	WBGene00001175	protein_coding	C46F4.1	0.022143	0.978503
egl-8	WBGene00001177	protein_coding	B0348.4	-0.0546259	0.867756
egl-9	WBGene00001178	protein_coding	F22E12.4	-0.0472751	0.954196
egl-10	WBGene00001179	protein_coding	F28C1.2	-0.0829824	0.839286
egl-13	WBGene00001182	protein_coding	T22B7.1	-0.0330802	0.950362
egl-15	WBGene00001184	protein_coding	F58A3.2	0.0535982	0.888209
egl-17	WBGene00001185	protein_coding	F38G1.2	-0.173531	0.836914
egl-18	WBGene00001186	protein_coding	F55A8.1	-0.117651	0.734442
egl-19	WBGene00001187	protein_coding	C48A7.1	-0.0299758	0.95772
egl-20	WBGene00001188	protein_coding	W08D2.1	-0.164637	0.763513
egl-21	WBGene00001189	protein_coding	F01D4.4	0.122135	0.84564
egl-23	WBGene00001190	protein_coding	Y37A1B.11	-0.242555	0.52078
egl-26	WBGene00001193	protein_coding	C23H3.1	0.145814	0.621537
egl-27	WBGene00001194	protein_coding	C04A2.3	0.00923274	0.97753
egl-30	WBGene00001196	protein_coding	M01D7.7	0.0303006	0.955765
egl-36	WBGene00001202	protein_coding	R07A4.1	-0.233849	0.667767
egl-38	WBGene00001204	protein_coding	C04G2.7	-0.124648	0.801431
egl-43	WBGene00001207	protein_coding	R53.3	-0.211959	0.480966
egl-44	WBGene00001208	protein_coding	F28B12.2	0.0116291	0.964943
egl-45	WBGene00001209	protein_coding	C27D11.1	0.0876603	0.846997
egl-46	WBGene00001210	protein_coding	K11G9.4	0.214614	0.782607
egl-47	WBGene00001211	protein_coding	C50H2.2	-0.175113	0.730741
ego-1	WBGene00001214	protein_coding	F26A3.3	0.572717	0.203875
ego-2	WBGene00001215	protein_coding	Y53H1C.2	0.219897	0.390382
ehn-3	WBGene00001223	protein_coding	ZK616.10	-0.116985	0.907278
ehs-1	WBGene00001224	protein_coding	ZK1248.3	0.0753571	0.887413
eif-3.B	WBGene00001225	protein_coding	Y54E2A.11	0.132905	0.712428
eif-3.C	WBGene00001226	protein_coding	T23D8.4	0.137222	0.750785
eif-3.D	WBGene00001227	protein_coding	R08D7.3	0.06084	0.901639
eif-3.E	WBGene00001228	protein_coding	B0511.10	0.0115739	0.981283
eif-3.F	WBGene00001229	protein_coding	D2013.7	-0.164344	0.518401
eif-3.G	WBGene00001230	protein_coding	F22B5.2	0.065121	0.870048
eif-3.H	WBGene00001231	protein_coding	C41D11.2	-0.0666212	0.891236
eif-3.I	WBGene00001232	protein_coding	Y74C10AR.1	0.0927411	0.826255
eif-3.K	WBGene00001233	protein_coding	T16G1.11	-0.0198675	0.970794
eif-6	WBGene00001234	protein_coding	C47B2.5	0.0213723	0.968957
elb-1	WBGene00001235	protein_coding	Y41C4A.10	0.202242	0.616843
elc-1	WBGene00001236	protein_coding	Y82E9BR.15	0.0761864	0.804442
elc-2	WBGene00001237	protein_coding	W03H1.2	-0.252265	0.767563
elo-1	WBGene00001239	protein_coding	F56H11.4	-0.539321	0.00855892
elo-2	WBGene00001240	protein_coding	F11E6.5	-0.646667	0.000119366
elo-3	WBGene00001241	protein_coding	D2024.3	0.0433817	0.925951
elo-4	WBGene00001242	protein_coding	C40H1.4	0.163367	0.870885
elo-5	WBGene00001243	protein_coding	F41H10.7	-0.492875	0.0297041
elo-6	WBGene00001244	protein_coding	F41H10.8	-1.07501	1.54624e-08
elo-7	WBGene00001245	protein_coding	F56H11.3	0.445866	0.487202
elo-8	WBGene00001246	protein_coding	Y47D3A.30	0.176611	0.84101
elo-9	WBGene00001247	protein_coding	Y53F4B.2	-0.212155	0.587448
elp-1	WBGene00001248	protein_coding	F38A6.2	-0.11388	0.676077
elt-1	WBGene00001249	protein_coding	W09C2.1	-0.252018	0.197721
elt-2	WBGene00001250	protein_coding	C33D3.1	0.25597	0.445483
elt-3	WBGene00001251	protein_coding	K02B9.4	-0.139942	0.670897
elt-4	WBGene00001252	protein_coding	C39B10.6	-0.436016	0.484927
elt-6	WBGene00001253	protein_coding	F52C12.5	-0.0985253	0.862497
emb-4	WBGene00001258	protein_coding	Y80D3A.2	0.44359	0.064395
emb-5	WBGene00001259	protein_coding	T04A8.14	0.214768	0.284594
emb-8	WBGene00001262	protein_coding	K10D2.6	0.250243	0.45011
emb-9	WBGene00001263	protein_coding	K04H4.1	0.306868	0.256869
emb-27	WBGene00001281	protein_coding	F10B5.6	0.181646	0.677882
emb-30	WBGene00001284	protein_coding	F54C8.3	-0.016429	0.968797
emo-1	WBGene00001303	protein_coding	F32D8.6	-0.0493998	0.913929
emr-1	WBGene00001309	protein_coding	M01D7.6	0.13593	0.730979
end-1	WBGene00001310	protein_coding	F58E10.2	-0.0130724	0.996126
end-3	WBGene00001311	protein_coding	F58E10.5	0.275519	0.683011
ent-1	WBGene00001320	protein_coding	ZK809.4	0.122818	0.801945
eor-1	WBGene00001324	protein_coding	R11E3.6	0.0690202	0.84359
eor-2	WBGene00001325	protein_coding	C44H4.7	-0.0256262	0.947975
epi-1	WBGene00001328	protein_coding	K08C7.3	-0.0244255	0.956704
epn-1	WBGene00001329	protein_coding	T04C10.2	0.0349886	0.9445
eps-8	WBGene00001330	protein_coding	Y57G11C.24	-0.36304	0.0378952
erd-2	WBGene00001331	protein_coding	F09B9.3	0.0837835	0.800232
eri-1	WBGene00001332	protein_coding	T07A9.5	0.0808378	0.878975
erm-1	WBGene00001333	protein_coding	C01G8.5	-0.345348	0.0284337
ero-1	WBGene00001334	protein_coding	Y105E8B.8	0.0367313	0.948124
erp-1	WBGene00001335	protein_coding	F35A5.8	-0.0034512	0.999135
qars-1	WBGene00001336	protein_coding	Y41E3.4	0.253098	0.21682
ears-1	WBGene00001337	protein_coding	ZC434.5	-0.00805757	0.990447
ears-2	WBGene00001338	protein_coding	T07A9.2	-0.055306	0.904209
etr-1	WBGene00001340	protein_coding	T01D1.2	-0.0220893	0.95543
fos-1	WBGene00001345	protein_coding	F29G9.4	0.0815059	0.804992
evl-14	WBGene00001352	protein_coding	H38K22.1	0.105364	0.543283
evl-20	WBGene00001358	protein_coding	F22B5.1	0.171241	0.70785
exc-4	WBGene00001365	protein_coding	Y105E8A.22	0.187333	0.593669
exc-5	WBGene00001366	protein_coding	C33D9.1	-0.15299	0.574843
exc-7	WBGene00001368	protein_coding	F35H8.5	0.0505176	0.93681
exl-1	WBGene00001371	protein_coding	F26H11.5	0.160067	0.722396
exo-3	WBGene00001372	protein_coding	R09B3.1	0.723793	0.143239
exp-1	WBGene00001373	protein_coding	H35N03.1	-0.0989405	0.847939
exp-2	WBGene00001374	protein_coding	F12F3.1	0.0867159	0.88943
eya-1	WBGene00001377	protein_coding	C49A1.4	-0.00403468	0.999143
far-1	WBGene00001385	protein_coding	F02A9.2	-0.0544991	0.892524
far-2	WBGene00001386	protein_coding	F02A9.3	0.949942	0.0308529
far-3	WBGene00001387	protein_coding	F15B9.1	0.0883743	0.941234
far-4	WBGene00001388	protein_coding	F15B9.2	0.0579179	NA
far-5	WBGene00001389	protein_coding	F15B9.3	-0.263857	0.532816
far-6	WBGene00001390	protein_coding	W02A2.2	0.922943	0.0396046
far-7	WBGene00001391	protein_coding	K01A2.2	-0.0249103	0.981231
far-8	WBGene00001392	protein_coding	K02F3.3	0.1124	0.911687
fat-1	WBGene00001393	protein_coding	Y67H2A.8	0.108739	0.81116
fat-2	WBGene00001394	protein_coding	W02A2.1	-0.474233	0.0767143
fat-3	WBGene00001395	protein_coding	W08D2.4	0.115536	0.868187
fat-4	WBGene00001396	protein_coding	T13F2.1	-0.0347975	0.957189
fat-5	WBGene00001397	protein_coding	W06D12.3	0.0921542	0.924626
fat-6	WBGene00001398	protein_coding	VZK822L.1	-0.837596	0.00223155
fat-7	WBGene00001399	protein_coding	F10D2.9	-0.806623	0.0900362
fax-1	WBGene00001400	protein_coding	F56E3.4	0.0800649	0.931524
fbf-1	WBGene00001401	protein_coding	H12I13.4	0.437603	0.494194
fbf-2	WBGene00001402	protein_coding	F21H12.5	0.235548	0.75504
fbl-1	WBGene00001403	protein_coding	F56H11.1	-0.508535	0.0258722
fbp-1	WBGene00001404	protein_coding	K07A3.1	0.034768	0.950866
fce-1	WBGene00001405	protein_coding	C04F12.10	0.0657748	0.823001
fce-2	WBGene00001406	protein_coding	F48F5.5	-0.0861052	0.87619
feh-1	WBGene00001410	protein_coding	Y54F10AM.2	-0.174925	0.803134
fem-1	WBGene00001411	protein_coding	F35D6.1	0.174351	0.421848
fem-2	WBGene00001412	protein_coding	T19C3.8	0.177231	0.554222
fem-3	WBGene00001413	protein_coding	C01F6.4	0.161147	0.863764
fer-1	WBGene00001414	protein_coding	F43G9.6	0.633064	0.234093
fib-1	WBGene00001423	protein_coding	T01C3.7	-0.270034	0.544498
fis-1	WBGene00001424	protein_coding	F41G3.4	0.0419731	NA
fis-2	WBGene00001425	protein_coding	F13B9.8	0.21057	0.454534
fkb-1	WBGene00001426	protein_coding	F36H1.1	-0.199481	0.228986
fkb-2	WBGene00001427	protein_coding	Y18D10A.19	0.00973728	0.988107
fkb-3	WBGene00001428	protein_coding	C05C8.3	-0.00546841	0.998955
fkb-4	WBGene00001429	protein_coding	ZC455.10	-0.0270587	0.970794
fkb-5	WBGene00001430	protein_coding	C50F2.6	0.226805	0.763513
fkb-6	WBGene00001431	protein_coding	F31D4.3	0.929496	0.00086468
fkb-7	WBGene00001432	protein_coding	B0511.1	-0.72012	0.13749
fkb-8	WBGene00001433	protein_coding	Y18D10A.25	-0.25023	0.327521
fkh-2	WBGene00001434	protein_coding	T14G12.4	-0.173203	0.85437
fkh-3	WBGene00001435	protein_coding	C29F7.4	0.513019	0.16577
fkh-4	WBGene00001436	protein_coding	C29F7.5	0.273006	0.394499
fkh-5	WBGene00001437	protein_coding	F26A1.2	-0.0759172	0.946742
fkh-6	WBGene00001438	protein_coding	B0286.5	0.0772206	0.937644
fkh-7	WBGene00001439	protein_coding	F26D12.1	-0.0872677	0.876416
fkh-8	WBGene00001440	protein_coding	F40H3.4	0.148395	0.803664
fkh-9	WBGene00001441	protein_coding	K03C7.2	-0.212618	0.302271
fkh-10	WBGene00001442	protein_coding	C25A1.2	-0.0406674	0.961887
fli-1	WBGene00001443	protein_coding	B0523.5	0.0997698	0.790982
flp-1	WBGene00001444	protein_coding	F23B2.5	0.377548	0.434243
flp-2	WBGene00001445	protein_coding	W07E11.3	0.110901	0.891463
flp-3	WBGene00001446	protein_coding	W07E11.2	0.319319	0.518844
flp-4	WBGene00001447	protein_coding	C18D1.3	0.0384407	0.956525
flp-5	WBGene00001448	protein_coding	C03G5.7	-0.152653	0.730741
flp-6	WBGene00001449	protein_coding	F07D3.2	-0.0597764	0.943055
flp-7	WBGene00001450	protein_coding	F49E10.3	-0.108179	0.858116
flp-8	WBGene00001451	protein_coding	F31F6.4	-0.148208	0.828639
flp-9	WBGene00001452	protein_coding	C36H8.3	0.0791323	0.901103
flp-10	WBGene00001453	protein_coding	T06C10.4	-0.0427902	0.946858
flp-11	WBGene00001454	protein_coding	K02G10.4	0.203921	0.704285
flp-12	WBGene00001455	protein_coding	C05E11.8	0.0999755	0.892524
flp-13	WBGene00001456	protein_coding	F33D4.3	0.133624	0.872838
flp-14	WBGene00001457	protein_coding	Y37D8A.15	0.107577	0.878325
flp-15	WBGene00001458	protein_coding	ZK525.1	0.0322965	0.95543
flp-16	WBGene00001459	protein_coding	F15D4.8	-0.0158648	0.980747
flp-17	WBGene00001460	protein_coding	C52D10.11	0.121563	0.879911
flp-18	WBGene00001461	protein_coding	Y48D7A.2	0.362682	0.447934
flp-19	WBGene00001462	protein_coding	M79.4	0.36942	0.359644
flp-20	WBGene00001463	protein_coding	E01H11.3	0.143305	0.818155
flp-21	WBGene00001464	protein_coding	C26F1.10	0.0578595	0.942828
flr-1	WBGene00001465	protein_coding	F02D10.5	-0.502751	0.075996
flr-2	WBGene00001466	protein_coding	F58H1.4	0.0561623	0.950854
flr-4	WBGene00001468	protein_coding	F09B12.6	-0.224808	0.70785
flt-1	WBGene00001470	protein_coding	ZK783.4	-0.0308663	0.955112
fmi-1	WBGene00001475	protein_coding	F15B9.7	-0.138172	0.75005
fmo-1	WBGene00001476	protein_coding	K08C7.2	-0.645442	0.00114484
fmo-2	WBGene00001477	protein_coding	K08C7.5	-0.416293	0.532816
fmo-3	WBGene00001478	protein_coding	Y39A1A.19	0.0108555	0.996187
fmo-4	WBGene00001479	protein_coding	F53F4.5	0.614809	0.0129256
fmo-5	WBGene00001480	protein_coding	H24K24.5	0.274406	0.389649
fog-1	WBGene00001481	protein_coding	Y54E10A.4	-0.112197	0.88943
fog-2	WBGene00001482	protein_coding	Y113G7B.5	0.474111	0.445483
fog-3	WBGene00001483	protein_coding	C03C11.2	-0.213274	0.818155
fox-1	WBGene00001484	protein_coding	T07D1.4	-0.0114187	0.992647
fre-1	WBGene00001485	protein_coding	Y113G7A.8	0.0281322	0.953411
frh-1	WBGene00001486	protein_coding	F59G1.7	-0.17125	0.756254
frk-1	WBGene00001487	protein_coding	T04B2.2	0.206817	0.8252
frm-1	WBGene00001488	protein_coding	ZK270.2	-0.0556839	0.925039
frm-2	WBGene00001489	protein_coding	T04C9.6	-0.0778111	0.869606
frm-3	WBGene00001490	protein_coding	H05G16.1	-0.0117645	0.98535
frm-4	WBGene00001491	protein_coding	C24A11.8	-0.239056	0.216347
frm-5.1	WBGene00001492	protein_coding	Y38C1AB.8	-0.0301074	0.950781
frm-7	WBGene00001493	protein_coding	C51F7.1	0.125999	0.568853
frm-8	WBGene00001494	protein_coding	H09G03.2	-0.00968989	0.995322
frm-9	WBGene00001495	protein_coding	F31B12.3	0.203927	0.740655
frm-10	WBGene00001496	protein_coding	F25H9.5	0.133726	0.652064
fars-1	WBGene00001497	protein_coding	T08B2.9	0.167172	0.671207
fars-3	WBGene00001498	protein_coding	F22B5.9	0.0529359	0.892524
fsn-1	WBGene00001499	protein_coding	C26E6.5	0.455451	0.128394
ftn-1	WBGene00001500	protein_coding	C54F6.14	-1.35054	1.13326e-07
ftn-2	WBGene00001501	protein_coding	D1037.3	-1.2602	2.52802e-23
ftt-2	WBGene00001502	protein_coding	F52D10.3	-0.187636	0.587448
fum-1	WBGene00001503	protein_coding	H14A12.2	-0.321146	0.347619
fut-1	WBGene00001505	protein_coding	K08F8.3	-0.155362	0.559079
fut-2	WBGene00001506	protein_coding	EGAP9.2	0.289155	0.497581
fut-4	WBGene00001507	protein_coding	K12H6.3	-0.114879	0.912731
fut-8	WBGene00001508	protein_coding	C10F3.6	-0.208059	0.430609
fzo-1	WBGene00001509	protein_coding	ZK1248.14	0.125733	0.595743
fzr-1	WBGene00001510	protein_coding	ZK1307.6	0.244778	0.381778
fzy-1	WBGene00001511	protein_coding	ZK177.6	0.816389	0.0818726
gab-1	WBGene00001512	protein_coding	ZC482.1	0.11772	0.687739
gad-1	WBGene00001513	protein_coding	T05H4.14	0.502297	0.0669118
xnd-1	WBGene00001514	protein_coding	C05D2.5	0.476014	0.442648
gap-1	WBGene00001515	protein_coding	T24C12.2	-0.11229	0.701281
gap-2	WBGene00001516	protein_coding	ZK899.8	-0.0708319	0.872208
gar-1	WBGene00001517	protein_coding	C15B12.5	0.000915492	0.999827
gar-2	WBGene00001518	protein_coding	F47D12.1	-0.101044	0.878975
gar-3	WBGene00001519	protein_coding	Y40H4A.1	-0.160458	0.616357
gas-1	WBGene00001520	protein_coding	K09A9.5	-0.451359	0.000824717
gbh-1	WBGene00001522	protein_coding	D2089.5	0.223153	0.684819
gbh-2	WBGene00001523	protein_coding	M05D6.7	-0.060512	0.899626
gck-1	WBGene00001526	protein_coding	T19A5.2	0.0698874	0.852617
gcs-1	WBGene00001527	protein_coding	F37B12.2	-0.228137	0.286063
gcy-1	WBGene00001528	protein_coding	AH6.1	0.473349	0.354314
gcy-2	WBGene00001529	protein_coding	R134.2	-0.00545077	0.99906
gcy-3	WBGene00001530	protein_coding	R134.1	-0.349674	0.626045
gcy-4	WBGene00001531	protein_coding	ZK970.5	-0.330238	0.626045
gcy-5	WBGene00001532	protein_coding	ZK970.6	0.416099	0.416373
gcy-6	WBGene00001533	protein_coding	B0024.6	-0.117889	0.904407
gcy-7	WBGene00001534	protein_coding	F52E1.4	0.447602	0.392402
gcy-8	WBGene00001535	protein_coding	C49H3.1	0.0115581	0.996052
gcy-9	WBGene00001536	protein_coding	ZK455.2	0.0812408	0.927272
gcy-11	WBGene00001537	protein_coding	C30G4.3	0.128496	0.815484
gcy-12	WBGene00001538	protein_coding	F08B1.2	0.111876	0.803134
gcy-13	WBGene00001539	protein_coding	F23H12.6	-0.290859	0.327435
gcy-14	WBGene00001540	protein_coding	ZC412.2	0.330982	0.661326
gcy-15	WBGene00001541	protein_coding	ZC239.7	0.299968	0.684631
gcy-17	WBGene00001542	protein_coding	W03F11.2	0.771364	0.100342
gcy-18	WBGene00001543	protein_coding	ZK896.8	0.40464	0.502889
gcy-19	WBGene00001544	protein_coding	C17F4.6	0.431161	0.51036
gcy-20	WBGene00001545	protein_coding	F21H7.9	0.0216733	0.989066
gcy-21	WBGene00001546	protein_coding	F22E5.3	0.201645	0.829856
gcy-22	WBGene00001547	protein_coding	T03D8.5	0.413218	0.403525
gcy-23	WBGene00001548	protein_coding	T26C12.4	0.319923	0.645407
gcy-25	WBGene00001549	protein_coding	Y105C5B.2	0.334107	0.635606
gcy-27	WBGene00001550	protein_coding	C06A12.4	0.0679515	0.943964
gcy-31	WBGene00001551	protein_coding	T07D1.1	0.275409	0.616843
gcy-32	WBGene00001552	protein_coding	C06B3.8	0.000347372	1
gcy-33	WBGene00001553	protein_coding	F57F5.2	-0.00721973	0.99906
gcy-34	WBGene00001554	protein_coding	M04G12.3	-0.0409812	0.956704
gcy-35	WBGene00001555	protein_coding	T04D3.4	0.15297	0.601365
gcy-36	WBGene00001556	protein_coding	C46E1.2	0.197063	0.70422
gcy-37	WBGene00001557	protein_coding	C54E4.3	0.000941943	0.999949
gdi-1	WBGene00001558	protein_coding	Y57G11C.10	-0.0296727	0.9445
gei-1	WBGene00001559	protein_coding	F45H7.2	-0.0988904	0.755691
gei-3	WBGene00001560	protein_coding	T22H6.6	0.0811053	0.872838
gei-4	WBGene00001561	protein_coding	W07B3.2	0.132564	0.828352
lin-66	WBGene00001562	protein_coding	B0513.1	0.0550216	0.932876
gei-6	WBGene00001563	protein_coding	C05C8.4	0.1156	0.765919
icl-1	WBGene00001564	protein_coding	C05E4.9	-0.664572	0.0343542
gei-8	WBGene00001565	protein_coding	C14B9.6	-0.0214173	0.96888
acdh-13	WBGene00001566	protein_coding	C28C12.9	-0.190732	0.551352
snpc-4	WBGene00001568	protein_coding	F32H2.1	0.128745	0.693899
gei-12	WBGene00001569	protein_coding	F52D2.4	0.724029	0.102137
gei-13	WBGene00001570	protein_coding	F58A4.11	-0.406606	0.0277878
gei-14	WBGene00001571	protein_coding	K01C8.5	0.383022	0.432498
gei-15	WBGene00001572	protein_coding	M03A8.4	-0.171181	0.69704
gei-17	WBGene00001574	protein_coding	W10D5.3	-0.00122029	0.99927
gei-18	WBGene00001575	protein_coding	Y37A1B.15	0.104738	0.926175
gem-4	WBGene00001577	protein_coding	T12A7.1	0.519991	0.02764
ges-1	WBGene00001578	protein_coding	R12A1.4	-0.384485	0.355728
gex-2	WBGene00001579	protein_coding	F56A11.1	0.000975127	0.999496
gex-3	WBGene00001580	protein_coding	F28D1.10	0.20712	0.302109
gfi-1	WBGene00001581	protein_coding	F57F4.3	-0.809192	0.0032179
gfi-2	WBGene00001582	protein_coding	K02A11.1	0.137623	0.378245
gfi-3	WBGene00001583	protein_coding	M163.4	0.0541913	0.922553
nrde-4	WBGene00001584	protein_coding	F45E4.10	0.00478717	0.998122
gfl-1	WBGene00001585	protein_coding	M04B2.3	0.0019944	0.999358
ggr-1	WBGene00001586	protein_coding	C09G5.1	-0.247751	0.504862
ggr-2	WBGene00001587	protein_coding	C45B2.4	-0.0318025	0.968535
ggr-3	WBGene00001588	protein_coding	F09C12.1	0.0130877	0.992779
gip-1	WBGene00001589	protein_coding	H04J21.3	0.0383295	0.922202
C45G3.3	WBGene00001590	protein_coding	C45G3.3	0.00955272	0.996985
glc-1	WBGene00001591	protein_coding	F11A5.10	0.40963	0.511764
glc-2	WBGene00001592	protein_coding	F25F8.2	-0.0912695	0.848297
glc-3	WBGene00001593	protein_coding	ZC317.3	-0.0127199	0.992779
glc-4	WBGene00001594	protein_coding	C27H5.8	-0.218719	0.639702
gld-1	WBGene00001595	protein_coding	T23G11.3	1.26336	0.000588025
gld-2	WBGene00001596	protein_coding	ZC308.1	0.0741322	0.800382
gld-3	WBGene00001597	protein_coding	T07F8.3	0.731912	0.143954
glh-1	WBGene00001598	protein_coding	T21G5.3	0.337943	0.652151
glh-2	WBGene00001599	protein_coding	C55B7.1	0.596889	0.249247
glh-3	WBGene00001600	protein_coding	B0414.6	0.56715	0.299914
glh-4	WBGene00001601	protein_coding	T12F5.3	0.269618	0.745563
gln-1	WBGene00001602	protein_coding	C45B2.5	0.0238581	0.970794
gln-2	WBGene00001603	protein_coding	K03H1.1	0.176067	0.110631
gln-3	WBGene00001604	protein_coding	Y105C5B.28	-0.0364369	0.956737
gln-5	WBGene00001606	protein_coding	F26D10.10	1.11659	0.00538643
gln-6	WBGene00001607	protein_coding	C28D4.3	0.991804	0.0185841
R07B1.8	WBGene00001608	protein_coding	R07B1.8	-0.231164	0.770703
glp-1	WBGene00001609	protein_coding	F02A9.6	0.623884	0.246766
glr-1	WBGene00001612	protein_coding	C06E1.4	-0.0409124	0.952814
glr-2	WBGene00001613	protein_coding	B0280.12	-0.384927	0.351452
glr-3	WBGene00001614	protein_coding	K10D3.1	-0.172775	0.819473
glr-4	WBGene00001615	protein_coding	C06A8.9	-0.235005	0.528691
glr-5	WBGene00001616	protein_coding	ZC196.7	-0.0191263	0.98287
glr-6	WBGene00001617	protein_coding	F41B4.4	-0.0114358	0.985044
glr-7	WBGene00001618	protein_coding	C43H6.9	-0.198175	0.832622
glr-8	WBGene00001619	protein_coding	F22A3.3	0.0168108	0.991963
glt-1	WBGene00001620	protein_coding	C12D12.2	-0.103966	0.8689
glt-3	WBGene00001621	protein_coding	K08F4.4	0.316141	0.543063
glt-4	WBGene00001622	protein_coding	T22E5.2	0.0641635	0.930913
glt-5	WBGene00001623	protein_coding	Y53C12A.2	0.304052	0.381667
glt-6	WBGene00001624	protein_coding	R05G6.6	0.370729	0.502158
glt-7	WBGene00001625	protein_coding	W03G1.1	0.382214	0.466707
gly-1	WBGene00001626	protein_coding	F44F4.6	0.0539811	0.959929
gly-2	WBGene00001627	protein_coding	C55B7.2	0.0155312	0.98535
gly-3	WBGene00001628	protein_coding	ZK688.8	0.0314595	0.940405
gly-4	WBGene00001629	protein_coding	Y116F11B.12	-0.255724	0.176562
gly-5	WBGene00001630	protein_coding	Y39E4B.12	-0.152356	0.441959
gly-6	WBGene00001631	protein_coding	H38K22.5	0.0396886	0.941447
gly-7	WBGene00001632	protein_coding	Y46H3A.6	0.390169	0.0579033
gly-8	WBGene00001633	protein_coding	Y66A7A.6	0.726899	0.0325531
gly-10	WBGene00001635	protein_coding	Y45F10D.3	0.231864	0.388231
gly-11	WBGene00001636	protein_coding	Y75B8A.9	-0.0584454	0.937228
gly-12	WBGene00001637	protein_coding	F48E3.1	-0.194214	0.573449
gly-13	WBGene00001638	protein_coding	B0416.6	0.030603	0.953982
gly-14	WBGene00001639	protein_coding	M01F1.1	-0.0430407	0.9698
gly-15	WBGene00001640	protein_coding	C54C8.11	0.147267	0.884405
gly-16	WBGene00001641	protein_coding	T15D6.2	NA	NA
gly-17	WBGene00001642	protein_coding	T15D6.3	NA	NA
gly-18	WBGene00001643	protein_coding	F22D6.11	-0.417201	0.150809
gly-19	WBGene00001644	protein_coding	F22D6.12	-0.21006	0.409356
gly-20	WBGene00001645	protein_coding	C03E10.4	0.145571	0.680904
gna-1	WBGene00001646	protein_coding	B0024.12	-0.150168	0.829404
gna-2	WBGene00001647	protein_coding	T23G11.2	1.24396	0.00182285
goa-1	WBGene00001648	protein_coding	C26C6.2	-0.0467306	0.918194
gob-1	WBGene00001649	protein_coding	H13N06.3	-0.0553883	0.895466
gon-1	WBGene00001650	protein_coding	F25H8.3	-0.253965	0.300886
gon-2	WBGene00001651	protein_coding	T01H8.5	-0.207153	0.156427
gon-4	WBGene00001653	protein_coding	K04D7.5	0.347364	0.290956
gop-1	WBGene00001660	protein_coding	C34E10.3	-0.0895203	0.72703
gop-2	WBGene00001661	protein_coding	C34E10.2	-0.0603281	0.915074
gop-3	WBGene00001662	protein_coding	C34E10.1	-0.198534	0.299968
gpa-1	WBGene00001663	protein_coding	T19C4.6	-0.459552	0.0980292
gpa-2	WBGene00001664	protein_coding	F38E1.5	-0.0636725	0.910057
gpa-3	WBGene00001665	protein_coding	E02C12.5	0.0472103	0.942088
gpa-4	WBGene00001666	protein_coding	T07A9.7	-0.34466	0.379964
gpa-5	WBGene00001667	protein_coding	F53B1.7	0.484213	0.425549
gpa-6	WBGene00001668	protein_coding	F48C11.1	-0.243047	0.729523
gpa-7	WBGene00001669	protein_coding	R10H10.5	-0.173029	0.608382
gpa-8	WBGene00001670	protein_coding	F56H9.3	-0.144456	0.871206
gpa-9	WBGene00001671	protein_coding	F56H9.4	-0.688072	0.027506
gpa-10	WBGene00001672	protein_coding	C55H1.2	-0.0293537	0.972548
gpa-11	WBGene00001673	protein_coding	C16A11.1	-0.0731461	0.903913
gpa-12	WBGene00001674	protein_coding	F18G5.3	-0.197966	0.560733
gpa-13	WBGene00001675	protein_coding	F18E2.5	-0.0848325	0.920798
gpa-14	WBGene00001676	protein_coding	B0207.3	-0.325882	0.332033
gpa-15	WBGene00001677	protein_coding	M04C7.1	-0.74863	0.00918187
gpa-16	WBGene00001678	protein_coding	Y95B8A.5	0.418459	0.0568204
gpb-1	WBGene00001679	protein_coding	F13D12.7	0.255102	0.388755
gpb-2	WBGene00001680	protein_coding	F52A8.2	-0.0686761	0.886719
gpc-1	WBGene00001681	protein_coding	K02A4.2	-0.0273401	0.96803
gpc-2	WBGene00001682	protein_coding	F08B6.2	-0.0651704	0.85409
gpd-1	WBGene00001683	protein_coding	T09F3.3	1.05333	0.0113629
gpd-2	WBGene00001684	protein_coding	K10B3.8	-0.0348525	0.959215
gpd-3	WBGene00001685	protein_coding	K10B3.7	0.184641	0.694198
gpd-4	WBGene00001686	protein_coding	F33H1.2	1.03622	0.0125399
gpn-1	WBGene00001687	protein_coding	F59D12.4	-0.812616	0.0605717
gpr-1	WBGene00001688	protein_coding	F22B7.13	0.260736	0.75424
gpr-2	WBGene00001689	protein_coding	C38C10.4	0.284984	0.708447
grd-1	WBGene00001690	protein_coding	R08B4.1	-0.361109	0.599824
grd-2	WBGene00001691	protein_coding	F46B3.5	0.0299819	NA
grd-3	WBGene00001692	protein_coding	W05E7.1	-0.675121	0.00020512
grd-4	WBGene00001693	protein_coding	T01B10.1	-0.22043	0.796078
grd-5	WBGene00001694	protein_coding	F41E6.2	-0.0780515	0.87438
grd-6	WBGene00001695	protein_coding	T18H9.1	-0.26188	0.745868
grd-7	WBGene00001696	protein_coding	F46H5.6	1.02505	0.0166795
grd-8	WBGene00001697	protein_coding	C37C3.4	0.658745	0.212187
grd-9	WBGene00001698	protein_coding	C04E6.6	0.221737	0.804325
grd-10	WBGene00001699	protein_coding	F09D12.1	-0.582016	0.00149547
grd-11	WBGene00001700	protein_coding	K02E2.2	0.335263	0.565445
grd-12	WBGene00001701	protein_coding	F02D8.2	-0.0210288	0.990447
grd-13	WBGene00001702	protein_coding	W05E7.3	-0.38767	0.0232901
grd-14	WBGene00001703	protein_coding	T01B10.2	0.531386	0.311916
grd-15	WBGene00001704	protein_coding	Y87G2A.15	0.224537	0.804829
grd-16	WBGene00001705	protein_coding	Y69A2AL.1	0.461068	0.444938
grh-1	WBGene00001707	protein_coding	Y48G8AR.1	-0.0499092	0.927231
grk-1	WBGene00001708	protein_coding	F19C6.1	-0.0225903	0.955112
grk-2	WBGene00001709	protein_coding	W02B3.2	0.054331	0.928873
grl-1	WBGene00001710	protein_coding	C24G6.7	0.0353635	0.975142
grl-2	WBGene00001711	protein_coding	T16G1.8	0.0107524	0.998472
grl-3	WBGene00001712	protein_coding	K03B8.7	-0.137461	0.888854
grl-4	WBGene00001713	protein_coding	F42C5.7	0.23031	0.659722
grl-5	WBGene00001714	protein_coding	Y47D7A.5	-0.119311	0.858116
grl-6	WBGene00001715	protein_coding	K10C2.5	-0.720006	0.15369
grl-7	WBGene00001716	protein_coding	T02E9.2	0.204137	0.822669
grl-8	WBGene00001717	protein_coding	ZC487.5	-0.480687	0.335951
grl-9	WBGene00001718	protein_coding	ZC487.4	0.558951	0.322974
grl-10	WBGene00001719	protein_coding	C26F1.5	0.0808315	0.927667
grl-11	WBGene00001720	protein_coding	ZK512.9	-0.039555	0.955112
grl-12	WBGene00001721	protein_coding	F28A12.2	0.134889	0.897756
grl-13	WBGene00001722	protein_coding	F32D1.4	-0.145313	0.889348
grl-14	WBGene00001723	protein_coding	T03D8.4	-0.0238813	0.970153
grl-15	WBGene00001724	protein_coding	Y75B8A.20	0.379664	0.588163
grl-16	WBGene00001725	protein_coding	Y65B4BR.6	0.879989	0.0554366
grl-17	WBGene00001726	protein_coding	C56A3.1	0.198184	0.695337
grl-18	WBGene00001727	protein_coding	T05C3.4	0.338834	0.640814
grl-19	WBGene00001728	protein_coding	R02D3.6	-0.00249661	0.999143
grl-20	WBGene00001729	protein_coding	C23H5.9	-0.461221	0.430609
grl-21	WBGene00001730	protein_coding	ZC168.5	-0.171662	0.849602
grl-22	WBGene00001731	protein_coding	W03A5.3	0.0470023	NA
grl-23	WBGene00001732	protein_coding	E02A10.2	-0.0357986	0.946328
grl-24	WBGene00001733	protein_coding	F11E6.2	0.131849	0.900187
grl-25	WBGene00001734	protein_coding	ZK643.8	0.0373527	0.957206
grl-26	WBGene00001735	protein_coding	K02D7.6	-0.331605	0.541046
grl-27	WBGene00001736	protein_coding	F40C5.3	0.0389854	0.960402
grl-28	WBGene00001737	protein_coding	T24A6.15	-0.161043	0.872208
grl-29	WBGene00001738	protein_coding	T24A6.18	0.149997	0.825882
grl-30	WBGene00001739	protein_coding	T24A6.3	0.0239611	NA
gro-1	WBGene00001740	protein_coding	ZC395.6	-0.14232	0.803134
grp-1	WBGene00001743	protein_coding	K06H7.4	0.300119	0.2649
gars-1	WBGene00001744	protein_coding	T10F2.1	0.028265	0.943964
gsa-1	WBGene00001745	protein_coding	R06A10.2	0.10561	0.767949
gsk-3	WBGene00001746	protein_coding	Y18D10A.5	0.15319	0.355826
gsp-1	WBGene00001747	protein_coding	F29F11.6	0.0996388	0.811426
gsp-2	WBGene00001748	protein_coding	F56C9.1	0.038069	0.898202
gst-1	WBGene00001749	protein_coding	R107.7	0.412529	0.122389
gst-2	WBGene00001750	protein_coding	K08F4.6	-0.613167	0.0789988
gst-3	WBGene00001751	protein_coding	K08F4.11	-0.268767	0.418857
gst-4	WBGene00001752	protein_coding	K08F4.7	-0.787777	0.00272937
gst-5	WBGene00001753	protein_coding	R03D7.6	-0.358057	0.328331
gst-6	WBGene00001754	protein_coding	F11G11.3	-0.549909	0.0371734
gst-7	WBGene00001755	protein_coding	F11G11.2	-0.0751852	0.916054
gst-8	WBGene00001756	protein_coding	F11G11.1	0.0303845	0.979294
gst-9	WBGene00001757	protein_coding	R05F9.5	0.424693	0.447215
gst-10	WBGene00001758	protein_coding	Y45G12C.2	-1.33023	2.57298e-05
gst-11	WBGene00001759	protein_coding	R11G1.3	-0.155133	0.833398
gst-12	WBGene00001760	protein_coding	F37B1.2	-0.281604	0.720572
gst-13	WBGene00001761	protein_coding	T26C5.1	-1.26271	1.00841e-08
gst-14	WBGene00001762	protein_coding	F37B1.3	-0.387974	0.544213
gst-15	WBGene00001763	protein_coding	F37B1.4	0.0140511	0.996052
gst-16	WBGene00001764	protein_coding	F37B1.5	-0.0935002	0.928391
gst-17	WBGene00001765	protein_coding	F37B1.6	0.122437	0.302271
gst-18	WBGene00001766	protein_coding	F37B1.7	0.254468	0.497013
gst-19	WBGene00001767	protein_coding	F37B1.8	0.603813	0.126257
gst-20	WBGene00001768	protein_coding	Y48E1B.10	-0.645661	0.0856825
gst-21	WBGene00001769	protein_coding	ZK697.6	-0.229204	0.764264
gst-22	WBGene00001770	protein_coding	F21H7.1	0.21308	0.688782
gst-23	WBGene00001771	protein_coding	T28A11.11	-0.225121	0.734454
gst-24	WBGene00001772	protein_coding	F37B1.1	0.784904	0.0270679
gst-25	WBGene00001773	protein_coding	F37F2.3	-0.595221	0.249898
gst-26	WBGene00001774	protein_coding	Y53F4B.29	-1.21404	2.34289e-06
gst-27	WBGene00001775	protein_coding	Y53F4B.30	-1.6661	1.37673e-22
gst-28	WBGene00001776	protein_coding	Y53F4B.31	-1.42823	7.62784e-11
gst-29	WBGene00001777	protein_coding	Y53F4B.32	-0.536754	0.309372
gst-30	WBGene00001778	protein_coding	ZK546.11	-0.0012151	0.999827
gst-31	WBGene00001779	protein_coding	Y53F4B.35	0.557376	0.286874
gst-32	WBGene00001780	protein_coding	Y53F4B.37	-0.101897	0.920691
gst-33	WBGene00001781	protein_coding	C02A12.1	-0.672138	0.13476
gst-34	WBGene00001782	protein_coding	Y1H11.1	-0.743305	0.129875
gst-35	WBGene00001783	protein_coding	Y1H11.2	0.0725006	0.943964
gst-36	WBGene00001784	protein_coding	R07B1.4	-0.182801	0.645456
gst-37	WBGene00001785	protein_coding	Y32G9A.1	0.0333849	0.942441
gst-38	WBGene00001786	protein_coding	F35E8.8	-0.678796	0.058401
gst-39	WBGene00001787	protein_coding	Y53F4B.33	-0.251258	0.511796
gst-40	WBGene00001788	protein_coding	F56B3.10	0.142411	0.797696
gst-41	WBGene00001789	protein_coding	R13D7.7	-0.375785	0.511371
gst-42	WBGene00001790	protein_coding	D1053.1	-1.01284	9.11503e-06
gst-43	WBGene00001791	protein_coding	Y71F9AL.5	-0.146719	0.75536
gst-44	WBGene00001792	protein_coding	F13A7.10	-0.495007	0.40836
gsy-1	WBGene00001793	protein_coding	Y46G5A.31	-0.144037	0.726056
gta-1	WBGene00001794	protein_coding	K04D7.3	-0.539198	1.35475e-06
gtl-1	WBGene00001795	protein_coding	C05C12.3	-0.0376534	0.947093
gtl-2	WBGene00001796	protein_coding	F54D1.5	0.00450325	0.99906
lite-1	WBGene00001803	protein_coding	C14F11.3	-0.0185987	0.9813
gur-3	WBGene00001804	protein_coding	ZC504.5	-0.234714	0.745416
gur-4	WBGene00001805	protein_coding	K09E4.5	0.467967	0.0609423
gur-5	WBGene00001806	protein_coding	ZK622.2	0.167116	0.862453
gut-2	WBGene00001808	protein_coding	T10G3.6	0.113523	0.797344
haf-1	WBGene00001811	protein_coding	C30H6.6	-0.301296	0.414657
haf-2	WBGene00001812	protein_coding	F43E2.4	0.819513	7.56064e-05
haf-3	WBGene00001813	protein_coding	F57A10.3	-0.19727	0.397768
haf-4	WBGene00001814	protein_coding	W04C9.1	-0.733197	0.00248044
hmt-1	WBGene00001815	protein_coding	W09D6.6	0.0916206	0.881469
haf-6	WBGene00001816	protein_coding	Y48G8AL.11	-0.280403	0.261258
haf-7	WBGene00001817	protein_coding	Y50E8A.16	0.445322	0.0473112
haf-8	WBGene00001818	protein_coding	Y57G11C.1	-0.0300442	0.941221
haf-9	WBGene00001819	protein_coding	ZK484.2	-0.650415	0.00410352
ham-1	WBGene00001820	protein_coding	F53B2.6	-0.0529413	0.94271
ham-2	WBGene00001821	protein_coding	C07A12.1	0.315136	0.392944
hap-1	WBGene00001823	protein_coding	ZC395.7	-0.115081	0.807591
hbl-1	WBGene00001824	protein_coding	F13D11.2	-0.0966607	0.863222
hcf-1	WBGene00001827	protein_coding	C46A5.9	0.347447	0.158599
hch-1	WBGene00001828	protein_coding	F40E10.1	0.0899093	0.913455
hcp-1	WBGene00001829	protein_coding	ZK1055.1	0.609376	0.253493
hcp-2	WBGene00001830	protein_coding	T06E4.1	0.439405	0.453532
hcp-3	WBGene00001831	protein_coding	F58A4.3	0.618255	0.207916
hcp-4	WBGene00001832	protein_coding	T03F1.9	0.317964	0.584345
hcp-6	WBGene00001833	protein_coding	Y110A7A.1	0.436085	0.453155
hda-1	WBGene00001834	protein_coding	C53A5.3	0.222414	0.508123
hda-2	WBGene00001835	protein_coding	C08B11.2	-0.0404598	0.934796
hda-3	WBGene00001836	protein_coding	R06C1.1	0.19463	0.438372
hda-4	WBGene00001837	protein_coding	C10E2.3	0.0161566	0.971176
hda-10	WBGene00001838	protein_coding	Y51H1A.5	0.0347936	0.951996
hdl-1	WBGene00001839	protein_coding	ZK829.2	0.441889	0.0546559
hel-1	WBGene00001840	protein_coding	C26D10.2	0.346348	0.195383
hen-1	WBGene00001841	protein_coding	C36B7.7	-0.481593	0.433159
her-1	WBGene00001842	protein_coding	ZK287.8	0.49575	0.356492
hgo-1	WBGene00001843	protein_coding	W06D4.1	-0.0339276	0.96013
hid-1	WBGene00001844	protein_coding	K02E10.2	-0.0804346	0.799562
hif-1	WBGene00001851	protein_coding	F38A6.3	-0.02469	0.960774
hil-1	WBGene00001852	protein_coding	C30G7.1	0.244576	0.680874
hil-2	WBGene00001853	protein_coding	Y73B6BL.9	-0.132829	0.848032
hil-3	WBGene00001854	protein_coding	F22F1.1	-0.135777	0.822764
hil-4	WBGene00001855	protein_coding	C18G1.5	0.391763	0.562687
hil-5	WBGene00001856	protein_coding	B0414.3	0.58714	0.249898
hil-6	WBGene00001857	protein_coding	F59A7.4	-0.0113218	0.997745
hil-7	WBGene00001858	protein_coding	C01B10.5	-0.133289	0.812164
hil-8	WBGene00001859	protein_coding	T05E8.2	-0.618173	0.252554
him-1	WBGene00001860	protein_coding	F28B3.7	0.119903	0.69293
him-3	WBGene00001862	protein_coding	ZK381.1	0.583791	0.205666
him-4	WBGene00001863	protein_coding	F15G9.4	0.0384531	0.961978
him-5	WBGene00001864	protein_coding	D1086.4	-0.108926	0.846695
him-6	WBGene00001865	protein_coding	T04A11.6	0.21753	0.722936
him-8	WBGene00001867	protein_coding	T07G12.12	0.306995	0.578821
him-10	WBGene00001869	protein_coding	R12B2.4	0.303471	0.619411
him-14	WBGene00001872	protein_coding	ZK1127.11	0.725527	0.145786
him-17	WBGene00001874	protein_coding	T09E8.2	0.238871	0.307515
his-1	WBGene00001875	protein_coding	T10C6.14	0.402596	0.373289
his-2	WBGene00001876	protein_coding	T10C6.13	0.179919	0.803742
his-3	WBGene00001877	protein_coding	T10C6.12	0.213415	0.761098
his-4	WBGene00001878	protein_coding	T10C6.11	0.534065	0.230447
his-5	WBGene00001879	protein_coding	F45F2.3	0.10388	0.900832
his-6	WBGene00001880	protein_coding	F45F2.13	0.104549	0.892743
his-7	WBGene00001881	protein_coding	F45F2.4	-0.130678	0.857692
his-8	WBGene00001882	protein_coding	F45F2.12	-0.0675759	0.939213
his-9	WBGene00001883	protein_coding	ZK131.3	0.215644	0.755691
his-10	WBGene00001884	protein_coding	ZK131.4	0.127621	0.881923
his-11	WBGene00001885	protein_coding	ZK131.5	0.22281	0.719032
his-12	WBGene00001886	protein_coding	ZK131.6	0.575298	0.2058
his-13	WBGene00001887	protein_coding	ZK131.7	0.167419	0.82781
his-14	WBGene00001888	protein_coding	ZK131.8	0.0826401	0.92625
his-15	WBGene00001889	protein_coding	ZK131.9	0.194715	0.752888
his-16	WBGene00001890	protein_coding	ZK131.10	0.531629	0.241908
his-17	WBGene00001891	protein_coding	K06C4.5	-0.0188125	0.98529
his-18	WBGene00001892	protein_coding	K06C4.10	0.0878192	0.921479
his-19	WBGene00001893	protein_coding	K06C4.11	-0.0757794	0.929741
his-20	WBGene00001894	protein_coding	K06C4.4	-0.050882	0.950985
his-21	WBGene00001895	protein_coding	K06C4.3	-0.143389	0.842903
his-22	WBGene00001896	protein_coding	K06C4.12	-0.0574175	0.943964
his-24	WBGene00001898	protein_coding	M163.3	-0.0556256	0.947719
his-25	WBGene00001899	protein_coding	ZK131.2	0.0492792	0.956477
his-26	WBGene00001900	protein_coding	ZK131.1	0.0873228	0.914766
his-27	WBGene00001901	protein_coding	K06C4.13	0.0344115	0.968535
his-28	WBGene00001902	protein_coding	K06C4.2	0.163848	0.859028
his-29	WBGene00001903	protein_coding	F35H10.11	0.956038	0.027506
his-30	WBGene00001904	protein_coding	F35H10.1	0.677477	0.126664
his-31	WBGene00001905	protein_coding	F17E9.12	0.775106	0.0314305
his-32	WBGene00001906	protein_coding	F17E9.10	0.334121	0.64665
his-33	WBGene00001907	protein_coding	F17E9.13	0.833584	0.0378989
his-34	WBGene00001908	protein_coding	F17E9.9	0.941049	0.0270083
his-35	WBGene00001909	protein_coding	C50F4.13	0.372811	0.0341016
C50F4.6	WBGene00001910	protein_coding	C50F4.6	0.318503	0.268198
his-37	WBGene00001911	protein_coding	C50F4.7	-0.0732689	0.901012
his-38	WBGene00001912	protein_coding	K03A1.6	1.21584	0.00189204
his-39	WBGene00001913	protein_coding	F45F2.2	0.151948	0.883825
his-40	WBGene00001914	protein_coding	K03A1.1	0.720776	0.1337
his-41	WBGene00001915	protein_coding	C50F4.5	0.352793	0.0733086
his-42	WBGene00001916	protein_coding	F08G2.3	0.0520289	0.956674
his-43	WBGene00001917	protein_coding	F08G2.2	0.493106	0.322237
his-44	WBGene00001918	protein_coding	F08G2.1	0.218812	0.720736
his-45	WBGene00001919	protein_coding	B0035.10	0.567743	0.30881
his-46	WBGene00001920	protein_coding	B0035.9	0.549253	0.325926
his-47	WBGene00001921	protein_coding	B0035.7	0.505253	0.388231
his-48	WBGene00001922	protein_coding	B0035.8	0.481949	0.41606
his-49	WBGene00001923	protein_coding	F07B7.5	0.0374588	0.96451
his-50	WBGene00001924	protein_coding	F07B7.9	0.234003	0.762278
his-51	WBGene00001925	protein_coding	F07B7.10	-0.0733793	0.933541
his-52	WBGene00001926	protein_coding	F07B7.4	-0.112928	0.879531
his-53	WBGene00001927	protein_coding	F07B7.3	-0.187118	0.785068
his-54	WBGene00001928	protein_coding	F07B7.11	-0.0464925	0.952596
his-55	WBGene00001929	protein_coding	F54E12.1	0.59028	0.276768
his-56	WBGene00001930	protein_coding	F54E12.3	0.614833	0.189699
his-57	WBGene00001931	protein_coding	F54E12.5	0.546584	0.31945
his-58	WBGene00001932	protein_coding	F54E12.4	0.531921	0.341685
his-59	WBGene00001933	protein_coding	F55G1.2	0.513598	0.361444
his-60	WBGene00001934	protein_coding	F55G1.11	0.693964	0.104606
his-61	WBGene00001935	protein_coding	F55G1.10	0.551624	0.332787
his-62	WBGene00001936	protein_coding	F55G1.3	0.590316	0.252633
his-63	WBGene00001937	protein_coding	F22B3.2	0.550238	0.326788
his-64	WBGene00001938	protein_coding	F22B3.1	0.601554	0.269961
his-65	WBGene00001939	protein_coding	H02I12.7	0.529062	0.360389
his-66	WBGene00001940	protein_coding	H02I12.6	0.516741	0.364666
his-67	WBGene00001941	protein_coding	T23D8.5	0.264216	0.722362
his-68	WBGene00001942	protein_coding	T23D8.6	0.268809	0.732165
his-69	WBGene00001943	protein_coding	E03A3.3	0.0158748	0.993637
his-70	WBGene00001944	protein_coding	E03A3.4	0.0860594	0.860072
his-71	WBGene00001945	protein_coding	F45E1.6	0.0230657	0.959347
his-72	WBGene00001946	protein_coding	Y49E10.6	-0.0452047	0.913976
his-73	WBGene00001947	protein_coding	W09H1.2	0.605714	0.242942
hlh-1	WBGene00001948	protein_coding	B0304.1	-0.0843316	0.815786
hlh-2	WBGene00001949	protein_coding	M05B5.5	-0.174485	0.605744
hlh-3	WBGene00001950	protein_coding	T24B8.6	-0.0353673	0.963739
hlh-4	WBGene00001951	protein_coding	T05G5.2	-0.109224	0.920691
hlh-6	WBGene00001952	protein_coding	T15H9.3	-0.461274	0.422138
hlh-8	WBGene00001953	protein_coding	C02B8.4	-0.312754	0.526946
hlh-10	WBGene00001954	protein_coding	ZK682.4	-0.263299	0.712428
hlh-11	WBGene00001955	protein_coding	F58A4.7	-0.0519129	0.912166
hlh-12	WBGene00001956	protein_coding	C28C12.8	0.245074	0.727754
hlh-13	WBGene00001957	protein_coding	F48D6.3	0.0668278	0.950781
hlh-14	WBGene00001958	protein_coding	C18A3.8	0.0588528	0.956781
hlh-15	WBGene00001959	protein_coding	C43H6.8	-0.0775061	0.946712
hlh-16	WBGene00001960	protein_coding	DY3.3	-0.165468	0.820819
hlh-17	WBGene00001961	protein_coding	F38C2.2	-0.345861	0.629243
hlh-19	WBGene00001962	protein_coding	F57C12.3	0.373266	0.52506
btb-1	WBGene00001963	protein_coding	F40G9.4	-0.0705166	0.943908
hlh-25	WBGene00001964	protein_coding	C17C3.7	0	NA
hlh-26	WBGene00001965	protein_coding	C17C3.8	0	NA
hlh-27	WBGene00001966	protein_coding	C17C3.10	0	NA
hlh-28	WBGene00001967	protein_coding	F31A3.2	0.0239611	NA
hlh-29	WBGene00001968	protein_coding	F31A3.4	-0.0335127	NA
hmg-1.1	WBGene00001971	protein_coding	Y48B6A.14	-0.168118	0.696021
hmg-1.2	WBGene00001972	protein_coding	F47D12.4	0.0482728	0.892743
hmg-3	WBGene00001973	protein_coding	C32F10.5	0.829019	0.0586782
hmg-4	WBGene00001974	protein_coding	T20B12.8	0.403296	0.0681694
hmg-5	WBGene00001975	protein_coding	F45E4.9	-0.00430557	0.99906
hmg-11	WBGene00001976	protein_coding	T05A7.4	-0.0186095	0.970411
hmg-12	WBGene00001977	protein_coding	Y17G7A.1	0.461385	0.381778
hmp-1	WBGene00001978	protein_coding	R13H4.4	0.0474202	0.891608
hmp-2	WBGene00001979	protein_coding	K05C4.6	0.205303	0.364409
hmr-1	WBGene00001980	protein_coding	W02B9.1	0.193729	0.274922
hnd-1	WBGene00001981	protein_coding	C44C10.8	0.120158	0.786645
hoe-1	WBGene00001983	protein_coding	E04A4.4	0.450747	0.0870111
hog-1	WBGene00001984	protein_coding	W06B11.4	0.531296	0.180039
hop-1	WBGene00001985	protein_coding	C18E3.8	0.478522	0.410026
hot-1	WBGene00001986	protein_coding	F43D2.4	-0.276819	0.337407
hot-2	WBGene00001987	protein_coding	Y39B6A.48	-0.263974	0.446775
hot-3	WBGene00001988	protein_coding	W02B8.5	-0.0741341	0.908161
hot-4	WBGene00001989	protein_coding	T12A2.16	-0.166332	0.706853
hot-5	WBGene00001990	protein_coding	K07A12.6	-0.316678	0.374371
hot-6	WBGene00001991	protein_coding	C13G3.2	-0.191554	0.702482
hot-7	WBGene00001992	protein_coding	Y48B6A.9	-0.211333	0.720331
hpd-1	WBGene00001993	protein_coding	T21C12.2	-0.491577	0.0653577
hpk-1	WBGene00001994	protein_coding	F20B6.8	-0.035907	0.956781
hpl-1	WBGene00001995	protein_coding	K08H2.6	-0.0425255	0.943964
hpl-2	WBGene00001996	protein_coding	K01G5.2	0.230936	0.563062
hpr-9	WBGene00001997	protein_coding	Y39A1A.23	0.259264	0.677331
hpr-17	WBGene00001998	protein_coding	F32A11.2	0.444251	0.490424
hrp-1	WBGene00001999	protein_coding	F42A6.7	0.501168	0.0126956
hrp-2	WBGene00002000	protein_coding	F58D5.1	0.198869	0.442562
hars-1	WBGene00002001	protein_coding	T11G6.1	0.170738	0.54959
hsb-1	WBGene00002002	protein_coding	K08E7.2	0.194546	0.581151
hse-5	WBGene00002003	protein_coding	B0285.5	0.234328	0.531133
hsf-1	WBGene00002004	protein_coding	Y53C10A.12	0.0540347	0.866169
hsp-1	WBGene00002005	protein_coding	F26D10.3	0.668558	0.0423084
hsp-3	WBGene00002007	protein_coding	C15H9.6	0.114659	0.833186
hsp-4	WBGene00002008	protein_coding	F43E2.8	0.880758	0.00720568
hsp-6	WBGene00002010	protein_coding	C37H5.8	0.0424558	0.940531
hsp-12.2	WBGene00002011	protein_coding	C14B9.1	-0.250281	0.753609
hsp-12.3	WBGene00002012	protein_coding	F38E11.1	0.324089	0.671207
hsp-12.6	WBGene00002013	protein_coding	F38E11.2	0.351027	0.629884
hsp-16.1	WBGene00002015	protein_coding	T27E4.8	1.2787	0.00019182
hsp-16.2	WBGene00002016	protein_coding	Y46H3A.3	1.18355	0.000301302
hsp-16.11	WBGene00002017	protein_coding	T27E4.2	1.25433	0.000251005
hsp-16.41	WBGene00002018	protein_coding	Y46H3A.2	1.22311	0.00022948
hsp-16.48	WBGene00002019	protein_coding	T27E4.3	1.4379	2.54662e-05
hsp-16.49	WBGene00002020	protein_coding	T27E4.9	1.34528	7.80972e-05
hsp-17	WBGene00002021	protein_coding	F52E1.7	0.472007	0.172818
hsp-25	WBGene00002023	protein_coding	C09B8.6	-0.207489	0.438372
hsp-43	WBGene00002024	protein_coding	C14F11.5	0.0383382	0.963435
hsp-60	WBGene00002025	protein_coding	Y22D7AL.5	-0.415924	0.0728193
hsp-70	WBGene00002026	protein_coding	C12C8.1	1.34735	1.23935e-05
hsr-9	WBGene00002027	protein_coding	T05F1.6	0.406119	0.0728193
hst-1	WBGene00002028	protein_coding	F08B4.6	-0.0207226	0.970153
hst-2	WBGene00002029	protein_coding	C34F6.4	-0.112282	0.811186
hst-3.1	WBGene00002030	protein_coding	F40H3.5	-0.265995	0.553757
hst-6	WBGene00002031	protein_coding	Y34B4A.3	-0.146274	0.729874
htp-1	WBGene00002032	protein_coding	F41H10.10	0.543311	0.351162
htp-2	WBGene00002033	protein_coding	Y73B6BL.2	0.835369	0.0720008
htp-3	WBGene00002034	protein_coding	F57C9.5	0.587969	0.287865
hum-1	WBGene00002035	protein_coding	F29D10.4	0.0622759	0.796078
hum-2	WBGene00002036	protein_coding	F36D4.3	0.294234	0.0388863
hum-4	WBGene00002037	protein_coding	F46C3.3	-0.305253	0.212936
hum-5	WBGene00002038	protein_coding	T02C12.1	-0.364404	0.067987
hum-6	WBGene00002039	protein_coding	T10H10.1	-0.210584	0.497583
hum-7	WBGene00002040	protein_coding	F56A6.2	0.0949887	0.869804
hum-8	WBGene00002041	protein_coding	Y66H1A.6	-0.271459	0.272907
hus-1	WBGene00002042	protein_coding	H26D21.1	0.301818	0.621808
hyl-1	WBGene00002043	protein_coding	C09G4.1	0.8486	0.000484901
hyl-2	WBGene00002044	protein_coding	K02G10.6	-0.178001	0.485084
icd-1	WBGene00002045	protein_coding	C56C10.8	-0.0667075	0.770114
icln-1	WBGene00002046	protein_coding	C01F6.8	0.218486	0.330415
icp-1	WBGene00002047	protein_coding	Y39G10AR.13	0.344364	0.565445
ida-1	WBGene00002048	protein_coding	B0244.2	0.29762	0.599604
ifa-1	WBGene00002050	protein_coding	F38B2.1	-0.467294	0.320351
ifa-3	WBGene00002051	protein_coding	F52E10.5	-0.127331	0.904209
ifa-4	WBGene00002052	protein_coding	K05B2.3	-0.1208	0.750016
ifb-1	WBGene00002053	protein_coding	F10C1.2	-0.288123	0.399445
ifb-2	WBGene00002054	protein_coding	F10C1.7	-0.395966	0.0340644
ifc-1	WBGene00002055	protein_coding	F37B4.2	-0.469291	0.0501241
ifc-2	WBGene00002056	protein_coding	M6.1	-0.463966	0.0587511
ifd-1	WBGene00002057	protein_coding	R04E5.10	-0.610426	0.000894708
ifd-2	WBGene00002058	protein_coding	F25E2.4	-0.194412	0.699371
ife-1	WBGene00002059	protein_coding	F53A2.6	0.173543	0.576872
ife-2	WBGene00002060	protein_coding	R04A9.4	-0.0980465	0.797438
ife-3	WBGene00002061	protein_coding	B0348.6	0.563361	0.0437911
ife-4	WBGene00002062	protein_coding	C05D9.5	-0.172906	0.749795
ife-5	WBGene00002063	protein_coding	Y57A10A.30	0.0772547	0.927272
iff-1	WBGene00002064	protein_coding	T05G5.10	1.01606	0.0185097
iff-2	WBGene00002065	protein_coding	F54C9.1	-0.23233	0.243226
ifg-1	WBGene00002066	protein_coding	M110.4	0.0908981	0.816086
ifp-1	WBGene00002067	protein_coding	C43C3.1	-0.545514	0.00307294
ify-1	WBGene00002068	protein_coding	C27A2.3	0.820006	0.0739897
ikb-1	WBGene00002069	protein_coding	C04F12.3	0.0939214	0.872511
ile-1	WBGene00002070	protein_coding	K07A1.8	0.0890734	0.843466
ile-2	WBGene00002071	protein_coding	T04G9.3	0.00771319	0.993861
ima-1	WBGene00002072	protein_coding	T19B10.7	0.124953	0.733955
ima-2	WBGene00002073	protein_coding	F26B1.3	0.866306	0.0609423
ima-3	WBGene00002074	protein_coding	F32E10.4	0.110112	0.719032
imb-1	WBGene00002075	protein_coding	F28B3.8	0.345663	0.113438
imb-2	WBGene00002076	protein_coding	R06A4.4	0.102596	0.711251
imb-3	WBGene00002077	protein_coding	C53D5.6	0.234345	0.481061
xpo-1	WBGene00002078	protein_coding	ZK742.1	0.0754968	0.888318
xpo-2	WBGene00002079	protein_coding	Y48G1A.5	0.513719	0.10911
xpo-3	WBGene00002080	protein_coding	C49H3.10	0.131909	0.750891
ina-1	WBGene00002081	protein_coding	F54G8.3	0.0132865	0.984834
inf-1	WBGene00002083	protein_coding	F57B9.6	-0.0774756	0.887972
ins-1	WBGene00002084	protein_coding	F13B12.5	0.133627	0.844827
ins-2	WBGene00002085	protein_coding	ZK75.2	0.275498	0.673112
ins-3	WBGene00002086	protein_coding	ZK75.3	0.350339	0.50442
ins-4	WBGene00002087	protein_coding	ZK75.1	0.230008	0.794551
ins-5	WBGene00002088	protein_coding	ZK84.3	0.151127	0.876515
ins-6	WBGene00002089	protein_coding	ZK84.6	0.383204	0.511371
ins-7	WBGene00002090	protein_coding	ZK1251.2	-0.0353121	0.965367
ins-8	WBGene00002091	protein_coding	ZK1251.11	0.0137084	NA
ins-9	WBGene00002092	protein_coding	C06E2.8	0.0307629	NA
ins-10	WBGene00002093	protein_coding	T08G5.12	0.360031	0.504127
ins-11	WBGene00002094	protein_coding	C17C3.4	-0.0452221	0.96888
ins-12	WBGene00002095	protein_coding	C17C3.19	0.0284805	0.967459
ins-13	WBGene00002096	protein_coding	C17C3.18	-0.450231	0.4775
ins-14	WBGene00002097	protein_coding	F41G3.16	-0.695333	0.136033
ins-15	WBGene00002098	protein_coding	F41G3.17	-0.0497625	0.959128
ins-16	WBGene00002099	protein_coding	Y39A3A.5	0.0189468	0.97753
ins-17	WBGene00002100	protein_coding	F56F3.6	0.141896	0.827283
ins-18	WBGene00002101	protein_coding	T28B8.2	0.0337166	0.953086
ins-19	WBGene00002102	protein_coding	T10D4.13	0.227184	0.620396
ins-20	WBGene00002103	protein_coding	ZK84.7	0.237927	0.734808
ins-21	WBGene00002104	protein_coding	M04D8.1	0.141395	0.892524
ins-22	WBGene00002105	protein_coding	M04D8.2	0.281721	0.717208
ins-23	WBGene00002106	protein_coding	M04D8.3	0.60649	0.00552988
ins-24	WBGene00002107	protein_coding	ZC334.3	0.306108	0.595343
ins-25	WBGene00002108	protein_coding	ZC334.8	-0.166448	0.86707
ins-26	WBGene00002109	protein_coding	ZC334.1	0.234468	0.79222
ins-27	WBGene00002110	protein_coding	ZC334.11	-0.361655	0.340125
ins-28	WBGene00002111	protein_coding	ZC334.9	0.177845	0.852662
ins-29	WBGene00002112	protein_coding	ZC334.10	0.272103	0.727821
ins-30	WBGene00002113	protein_coding	ZC334.2	0.0021788	0.999496
ins-31	WBGene00002114	protein_coding	T10D4.4	0.200175	0.824342
ins-32	WBGene00002115	protein_coding	Y8A9A.6	-0.0745364	0.919869
ins-33	WBGene00002116	protein_coding	W09C5.4	0.200054	0.795341
ins-34	WBGene00002117	protein_coding	F52B11.6	-0.0712377	0.943964
ins-35	WBGene00002118	protein_coding	K02E2.4	-0.315837	0.6765
ins-36	WBGene00002119	protein_coding	Y53H1A.4	-0.434499	0.343346
ins-37	WBGene00002120	protein_coding	F08G2.6	0.303273	0.69781
ins-38	WBGene00002121	protein_coding	C17C3.20	-0.000286777	NA
inx-1	WBGene00002123	protein_coding	C16E9.4	0.0104797	0.993637
inx-2	WBGene00002124	protein_coding	F08G12.10	0.0989899	0.924626
inx-3	WBGene00002125	protein_coding	F22F4.2	0.0986315	0.923137
inx-5	WBGene00002127	protein_coding	R09F10.4	0.0138325	0.97913
inx-6	WBGene00002128	protein_coding	C36H8.2	-0.408374	0.449716
inx-7	WBGene00002129	protein_coding	K02B2.4	0.139473	0.719032
inx-8	WBGene00002130	protein_coding	ZK792.2	1.48561	5.33665e-05
inx-9	WBGene00002131	protein_coding	ZK792.3	1.15964	0.0039353
inx-10	WBGene00002132	protein_coding	T18H9.5	-0.0494473	0.934809
inx-11	WBGene00002133	protein_coding	W04D2.3	-0.279495	0.418927
inx-12	WBGene00002134	protein_coding	ZK770.3	-0.168252	0.51848
inx-13	WBGene00002135	protein_coding	Y8G1A.2	-0.282382	0.217672
inx-14	WBGene00002136	protein_coding	F07A5.1	0.481889	0.22449
inx-15	WBGene00002137	protein_coding	R12E2.9	-0.641972	0.0015183
inx-16	WBGene00002138	protein_coding	R12E2.5	-0.541678	0.0138542
inx-17	WBGene00002139	protein_coding	R12E2.4	-0.769278	2.53029e-05
inx-18	WBGene00002140	protein_coding	C18H7.2	0.130263	0.722721
inx-19	WBGene00002141	protein_coding	T16H5.1	0.0042127	0.99906
inx-20	WBGene00002142	protein_coding	T23H4.1	0.00202838	0.999496
inx-21	WBGene00002143	protein_coding	Y47G6A.1	0.49091	0.407939
inx-22	WBGene00002144	protein_coding	Y47G6A.2	1.23	0.00221229
ipp-5	WBGene00002146	protein_coding	C09B8.1	-0.136876	0.660814
ire-1	WBGene00002147	protein_coding	C41C4.4	0.228768	0.159551
gon-14	WBGene00002148	protein_coding	F44C4.4	0.076043	0.808685
irk-1	WBGene00002149	protein_coding	R03E9.4	-0.117942	0.828298
irk-2	WBGene00002150	protein_coding	M02A10.2	-0.0911016	0.850072
irk-3	WBGene00002151	protein_coding	K04G11.5	-0.239349	0.498384
iars-1	WBGene00002152	protein_coding	R11A8.6	0.148817	0.661799
iars-2	WBGene00002153	protein_coding	C25A1.7	-0.108641	0.80827
isp-1	WBGene00002162	protein_coding	F42G8.12	-0.384427	0.00747288
ist-1	WBGene00002163	protein_coding	C54D1.3	-0.409733	0.138175
isw-1	WBGene00002169	protein_coding	F37A4.8	0.271589	0.240411
itr-1	WBGene00002173	protein_coding	F33D4.2	-0.213221	0.267836
itx-1	WBGene00002174	protein_coding	W03D8.6	-0.0879023	0.814003
jac-1	WBGene00002175	protein_coding	Y105C5B.21	-0.156609	0.367813
jip-1	WBGene00002176	protein_coding	F56D12.4	-0.00505674	0.998955
jkk-1	WBGene00002177	protein_coding	F35C8.3	0.0356895	0.955112
jnk-1	WBGene00002178	protein_coding	B0478.1	-0.211027	0.432956
jph-1	WBGene00002179	protein_coding	T22C1.7	0.103161	0.799562
jtr-1	WBGene00002180	protein_coding	Y77E11A.4	0.0138077	0.989853
kal-1	WBGene00002181	protein_coding	K03D10.1	0.0749164	0.877302
kap-1	WBGene00002182	protein_coding	F08F8.3	-0.063984	0.934809
kat-1	WBGene00002183	protein_coding	T02G5.8	-0.658819	0.00306356
kel-1	WBGene00002184	protein_coding	C47D12.7	0.0610614	0.906238
kel-3	WBGene00002185	protein_coding	T27E9.4	-0.0401504	0.879376
kel-10	WBGene00002186	protein_coding	T16H12.6	0.722785	0.133545
kgb-1	WBGene00002187	protein_coding	T07A9.3	-0.128741	0.528573
kgb-2	WBGene00002188	protein_coding	ZC416.4	0.691616	0.093334
kin-1	WBGene00002189	protein_coding	ZK909.2	-0.0578738	0.868187
kin-2	WBGene00002190	protein_coding	R07E4.6	-0.0473746	0.930101
kin-3	WBGene00002191	protein_coding	B0205.7	0.0581345	0.821563
kin-4	WBGene00002192	protein_coding	C10C6.1	0.070058	0.863817
kin-5	WBGene00002193	protein_coding	T13H10.1	0.354845	0.130145
kin-6	WBGene00002194	protein_coding	ZK20.2	0.261562	0.391236
kin-9	WBGene00002195	protein_coding	F08F1.1	-0.295447	0.543283
kin-10	WBGene00002196	protein_coding	T01G9.6	-0.0208823	0.968727
kin-14	WBGene00002198	protein_coding	F22D6.1	0.526608	0.285124
kin-15	WBGene00002199	protein_coding	M176.6	-0.482742	0.0701352
kin-16	WBGene00002200	protein_coding	M176.7	-0.591408	0.000912354
kin-18	WBGene00002201	protein_coding	T17E9.1	0.2188	0.297344
kin-19	WBGene00002202	protein_coding	C03C10.1	-0.102273	0.826851
kin-20	WBGene00002203	protein_coding	F46F2.2	-0.0218375	0.953086
kin-21	WBGene00002204	protein_coding	W08D2.8	0.0118372	NA
kin-23	WBGene00002205	protein_coding	W04G5.6	-0.278093	0.703933
kin-24	WBGene00002206	protein_coding	K07F5.4	0.121916	0.565445
sid-3	WBGene00002207	protein_coding	B0302.1	-0.0757482	0.882902
kin-26	WBGene00002208	protein_coding	T06C10.6	0.0239611	NA
kin-29	WBGene00002210	protein_coding	F58H12.1	-0.112601	0.626711
kin-30	WBGene00002211	protein_coding	M01B2.1	-0.0808989	0.941234
kin-31	WBGene00002212	protein_coding	B0523.1	-0.323081	0.672815
kin-32	WBGene00002213	protein_coding	C30F8.4	0.0334386	0.934809
klc-1	WBGene00002214	protein_coding	M7.2	0.65363	0.0689796
klc-2	WBGene00002215	protein_coding	C18C4.10	0.0491252	0.922728
klp-3	WBGene00002216	protein_coding	T09A5.2	-0.365338	0.215173
klp-4	WBGene00002217	protein_coding	F56E3.3	0.0184311	0.968957
klp-6	WBGene00002218	protein_coding	R144.1	-0.328178	0.078919
klp-7	WBGene00002219	protein_coding	K11D9.1	0.390886	0.222133
klp-8	WBGene00002220	protein_coding	C15C7.2	-0.222454	0.316546
klp-11	WBGene00002222	protein_coding	F20C5.2	0.0896937	0.709178
klp-12	WBGene00002223	protein_coding	T01G1.1	0.188536	0.164731
klp-13	WBGene00002224	protein_coding	F22F4.3	-0.340049	0.226329
klp-15	WBGene00002225	protein_coding	M01E11.6	0.395307	0.537672
klp-16	WBGene00002226	protein_coding	C41G7.2	0.467751	0.289092
klp-17	WBGene00002227	protein_coding	W02B12.7	-0.00253197	0.999143
klp-18	WBGene00002228	protein_coding	C06G3.2	0.46264	0.454527
klp-19	WBGene00002229	protein_coding	Y43F4B.6	-0.048417	0.925202
klp-20	WBGene00002230	protein_coding	Y50D7A.6	-0.111636	0.833381
knl-1	WBGene00002231	protein_coding	C02F5.1	0.393963	0.484128
kpc-1	WBGene00002232	protein_coding	F11A6.1	-0.0846409	0.786645
kqt-1	WBGene00002233	protein_coding	C25B8.1	-0.0165268	0.98535
kqt-2	WBGene00002234	protein_coding	M60.5	-0.350995	0.240346
kqt-3	WBGene00002235	protein_coding	Y54G9A.3	-0.195155	0.674536
kars-1	WBGene00002238	protein_coding	T02G5.9	0.332934	0.312573
ksr-1	WBGene00002239	protein_coding	F13B9.5	0.0325612	0.95052
ksr-2	WBGene00002240	protein_coding	F58D5.4	-0.0190112	0.968957
kup-1	WBGene00002241	protein_coding	F10C2.2	0.128866	0.608382
kvs-1	WBGene00002242	protein_coding	C53C9.3	0.0269875	0.965797
lad-2	WBGene00002243	protein_coding	Y54G2A.25	0.000368022	1
laf-1	WBGene00002244	protein_coding	Y71H2AM.19	0.385163	0.104606
lag-1	WBGene00002245	protein_coding	K08B4.1	0.0559533	0.869606
lag-2	WBGene00002246	protein_coding	Y73C8B.4	-0.0211953	0.990195
lam-1	WBGene00002247	protein_coding	W03F8.5	-0.0820159	0.7807
lam-3	WBGene00002248	protein_coding	T22A3.8	0.457205	0.459499
lap-1	WBGene00002249	protein_coding	ZK353.6	0.412713	0.00907066
lap-2	WBGene00002250	protein_coding	W07G4.4	0.134742	0.852268
lat-1	WBGene00002251	protein_coding	B0457.1	0.0817712	0.806844
lat-2	WBGene00002252	protein_coding	B0286.2	-0.0640137	0.951996
lbp-1	WBGene00002253	protein_coding	F40F4.3	0.267087	0.453374
lbp-2	WBGene00002254	protein_coding	F40F4.2	-0.0807517	0.904116
lbp-3	WBGene00002255	protein_coding	F40F4.4	0.314801	0.518001
lbp-4	WBGene00002256	protein_coding	ZK742.5	0.181307	0.665874
lbp-5	WBGene00002257	protein_coding	W02D3.7	-0.425356	0.199051
lbp-6	WBGene00002258	protein_coding	W02D3.5	-0.828365	1.97652e-06
lbp-7	WBGene00002259	protein_coding	T22G5.2	-1.53665	9.90633e-08
lbp-8	WBGene00002260	protein_coding	T22G5.6	-0.35602	0.59103
ldb-1	WBGene00002261	protein_coding	F58A3.1	-0.0844663	0.788508
ldh-1	WBGene00002262	protein_coding	F13D12.2	0.0698283	0.907278
lea-1	WBGene00002263	protein_coding	K08H10.1	0.402724	0.273949
lec-1	WBGene00002264	protein_coding	W09H1.6	-0.227098	0.313975
lec-2	WBGene00002265	protein_coding	F52H3.7	-0.0668057	0.919982
lec-3	WBGene00002266	protein_coding	ZK892.1	-0.109193	0.847177
lec-4	WBGene00002267	protein_coding	C44F1.3	-0.245141	0.465046
lec-5	WBGene00002268	protein_coding	ZK1248.16	0.0965045	0.817655
lec-6	WBGene00002269	protein_coding	Y55B1AR.1	-0.179352	0.581317
lec-7	WBGene00002270	protein_coding	R07B1.2	-0.546318	0.213358
lec-8	WBGene00002271	protein_coding	R07B1.10	-0.0159729	0.986465
lec-9	WBGene00002272	protein_coding	C16H3.2	-0.811837	3.27761e-06
lec-10	WBGene00002273	protein_coding	W01A11.4	-0.245553	0.476821
lec-11	WBGene00002274	protein_coding	F38A5.3	0.600511	0.0210443
lem-2	WBGene00002275	protein_coding	W01G7.5	0.793516	0.013604
lem-3	WBGene00002276	protein_coding	F42H11.2	0.239055	0.633575
let-2	WBGene00002280	protein_coding	F01G12.5	0.293452	0.31242
let-4	WBGene00002282	protein_coding	C44H4.2	-0.0189787	0.978856
let-19	WBGene00002295	protein_coding	K08F8.6	-0.035247	0.918158
ect-2	WBGene00002297	protein_coding	T19E10.1	0.596581	0.222945
let-23	WBGene00002299	protein_coding	ZK1067.1	-0.385621	0.00855892
let-49	WBGene00002324	protein_coding	Y54E5B.3	0.317821	0.376468
let-60	WBGene00002335	protein_coding	ZK792.6	-0.0214529	0.950516
let-70	WBGene00002344	protein_coding	M7.1	0.0265258	0.921447
myo-1	WBGene00002348	protein_coding	R06C7.10	-0.0232837	0.985987
let-92	WBGene00002363	protein_coding	F38H4.9	0.0548177	0.83741
let-99	WBGene00002368	protein_coding	K08E7.3	0.491665	0.420746
lpr-1	WBGene00002393	protein_coding	Y65B4BR.2	-0.0711368	0.951996
let-268	WBGene00002497	protein_coding	F52H3.1	0.219599	0.590296
let-363	WBGene00002583	protein_coding	B0261.2	-0.226941	0.124708
let-381	WBGene00002601	protein_coding	F26B1.7	0.0196755	0.97998
let-413	WBGene00002632	protein_coding	F26D11.11	-0.129069	0.551351
let-418	WBGene00002637	protein_coding	F26F12.7	0.0370973	0.941447
let-502	WBGene00002694	protein_coding	C10H11.9	0.359802	0.0476211
let-504	WBGene00002696	protein_coding	E01A2.4	0.66024	0.0229874
let-526	WBGene00002717	protein_coding	C01G8.9	0.00090416	0.999496
let-607	WBGene00002783	protein_coding	F57B10.1	0.321166	0.0686215
let-653	WBGene00002827	protein_coding	C29E6.1	-0.132404	0.855438
let-711	WBGene00002845	protein_coding	F57B9.2	0.167475	0.572653
let-716	WBGene00002850	protein_coding	C16A3.3	0.00957108	0.991963
let-721	WBGene00002855	protein_coding	C05D11.12	-0.166533	0.48818
let-754	WBGene00002879	protein_coding	C29E4.8	-0.327506	0.186085
let-756	WBGene00002881	protein_coding	C05D11.4	-0.163325	0.560031
let-765	WBGene00002889	protein_coding	F20H11.2	0.161303	0.481061
let-767	WBGene00002891	protein_coding	C56G2.6	-0.406812	0.139262
let-805	WBGene00002915	protein_coding	H19M22.2	0.0250949	0.96888
let-858	WBGene00002957	protein_coding	F33A8.1	0.534671	0.03495
lev-1	WBGene00002974	protein_coding	F09E8.7	0.0138079	0.968957
lev-8	WBGene00002975	protein_coding	C35C5.5	-0.268963	0.586367
lev-9	WBGene00002976	protein_coding	T07H6.5	0.175336	0.733711
lev-10	WBGene00002977	protein_coding	Y105E8A.7	0.122875	0.737732
lev-11	WBGene00002978	protein_coding	Y105E8B.1	-0.272903	0.514199
lfe-2	WBGene00002979	protein_coding	C46H11.4	-0.439195	1.62239e-05
lgg-1	WBGene00002980	protein_coding	C32D5.9	0.00836689	0.987082
lgg-2	WBGene00002981	protein_coding	ZK593.6	0.119735	0.695337
lgg-3	WBGene00002982	protein_coding	B0336.8	0.164003	0.747561
lgx-1	WBGene00002983	protein_coding	C54G7.3	0.220379	0.81001
lig-1	WBGene00002985	protein_coding	C29A12.3	0.377693	0.41181
lig-4	WBGene00002986	protein_coding	C07H6.1	-0.0493449	0.943964
lim-4	WBGene00002987	protein_coding	ZC64.4	-0.0211933	0.985987
lim-6	WBGene00002988	protein_coding	K03E6.1	0.194447	0.740473
lim-7	WBGene00002989	protein_coding	C04F1.3	0.0338184	0.968957
lin-1	WBGene00002990	protein_coding	C37F5.1	0.0109175	0.978766
lin-2	WBGene00002991	protein_coding	F17E5.1	-0.221318	0.295601
lin-3	WBGene00002992	protein_coding	F36H1.4	-0.228622	0.52378
lin-5	WBGene00002994	protein_coding	T09A5.10	0.102013	0.766712
lin-7	WBGene00002996	protein_coding	Y54G11A.10	0.0211636	0.963739
lin-8	WBGene00002997	protein_coding	B0454.1	-9.38684e-05	1
lin-9	WBGene00002998	protein_coding	ZK637.7	-0.0199166	0.972052
lin-10	WBGene00002999	protein_coding	C09H6.2	0.100951	0.782992
lin-11	WBGene00003000	protein_coding	ZC247.3	0.0150126	0.979958
lin-12	WBGene00003001	protein_coding	R107.8	0.239044	0.595617
lin-13	WBGene00003002	protein_coding	C03B8.4	-0.00355302	0.998955
lin-14	WBGene00003003	protein_coding	T25C12.1	-0.0992309	0.709178
lin-17	WBGene00003006	protein_coding	Y71F9B.5	-0.366093	0.219858
lin-18	WBGene00003007	protein_coding	C16B8.1	-0.0227062	0.970153
lin-22	WBGene00003008	protein_coding	Y54G2A.1	0.0205416	0.98397
lin-23	WBGene00003009	protein_coding	K10B2.1	0.137528	0.377076
lin-24	WBGene00003010	protein_coding	B0001.1	0.163443	0.571922
lin-25	WBGene00003011	protein_coding	F56H9.5	-0.209706	0.325926
lin-26	WBGene00003012	protein_coding	F18A1.2	-0.0216965	0.97308
lin-28	WBGene00003014	protein_coding	F02E9.2	-0.123586	0.502739
lin-29	WBGene00003015	protein_coding	W03C9.4	-0.206066	0.708927
lin-31	WBGene00003017	protein_coding	K10G6.1	-0.290934	0.486846
lin-32	WBGene00003018	protein_coding	T14F9.5	0.0839086	0.936401
lin-33	WBGene00003019	protein_coding	H32C10.2	-0.0667074	0.86707
lin-35	WBGene00003020	protein_coding	C32F10.2	0.0685426	0.857572
lin-36	WBGene00003021	protein_coding	F44B9.6	0.398504	0.0399667
lin-37	WBGene00003022	protein_coding	ZK418.4	0.267391	0.351378
lin-39	WBGene00003024	protein_coding	C07H6.7	0.048741	0.954721
lin-40	WBGene00003025	protein_coding	T27C4.4	0.0866202	0.843479
lin-41	WBGene00003026	protein_coding	C12C8.3	-0.024561	0.956477
lin-44	WBGene00003029	protein_coding	E01A2.3	-0.192631	0.773597
lin-45	WBGene00003030	protein_coding	Y73B6A.5	0.0932911	0.671802
lin-46	WBGene00003031	protein_coding	R186.4	-0.433446	0.202277
lin-48	WBGene00003033	protein_coding	F34D10.5	-0.21949	0.684819
lin-49	WBGene00003034	protein_coding	F42A9.2	0.0344718	0.914673
lin-52	WBGene00003035	protein_coding	ZK632.13	0.121969	0.808957
lin-53	WBGene00003036	protein_coding	K07A1.12	0.461122	0.18935
lin-54	WBGene00003037	protein_coding	JC8.6	0.474541	0.261989
lin-56	WBGene00003038	protein_coding	ZK673.3	0.0438544	0.943964
lin-59	WBGene00003040	protein_coding	T12F5.4	0.0529576	0.897756
lin-61	WBGene00003041	protein_coding	R06C7.7	0.102061	0.821264
lip-1	WBGene00003043	protein_coding	C05B10.1	0.294705	0.103966
lir-1	WBGene00003044	protein_coding	F18A1.3	-0.12257	0.75677
lir-2	WBGene00003045	protein_coding	F18A1.4	0.024045	0.962853
lir-3	WBGene00003046	protein_coding	F37H8.1	-0.152323	0.801166
lis-1	WBGene00003047	protein_coding	T03F6.5	0.0886773	0.773468
lit-1	WBGene00003048	protein_coding	W06F12.1	0.0703832	0.830037
lmn-1	WBGene00003052	protein_coding	DY3.2	-0.0753314	0.86114
lmp-1	WBGene00003053	protein_coding	C03B1.12	-0.157466	0.500477
lon-1	WBGene00003055	protein_coding	F48E8.1	0.284438	0.690321
lon-2	WBGene00003056	protein_coding	C39E6.1	0.0252878	0.958979
lon-3	WBGene00003057	protein_coding	ZK836.1	0.230014	0.602826
lov-1	WBGene00003058	protein_coding	ZK945.9	0.0862339	0.941434
lpd-2	WBGene00003059	protein_coding	C48E7.3	-0.0947669	0.897669
lpd-3	WBGene00003060	protein_coding	Y47G6A.23	0.0565703	0.904409
lpd-5	WBGene00003061	protein_coding	ZK973.10	-0.535777	0.15369
lpd-6	WBGene00003062	protein_coding	K09H9.6	0.407597	0.279326
lpd-7	WBGene00003063	protein_coding	R13A5.12	0.256281	0.0929921
lpd-8	WBGene00003064	protein_coding	R10H10.1	-0.0895917	0.811954
lpd-9	WBGene00003065	protein_coding	T21C9.5	-0.432128	0.012561
lpl-1	WBGene00003066	protein_coding	ZC410.7	-0.222758	0.258635
lrk-1	WBGene00003068	protein_coding	T27C10.6	-0.00497718	0.994948
lrp-1	WBGene00003071	protein_coding	F29D11.1	0.0582638	0.887413
lrp-2	WBGene00003072	protein_coding	T21E3.3	-0.0719276	0.82781
lars-1	WBGene00003073	protein_coding	R74.1	0.233764	0.231171
lars-2	WBGene00003074	protein_coding	ZK524.3	-0.23335	0.470195
lrx-1	WBGene00003075	protein_coding	T04H1.6	-0.222719	0.806662
lsm-1	WBGene00003076	protein_coding	F40F8.9	0.302755	0.47349
lsm-3	WBGene00003077	protein_coding	Y62E10A.12	0.0667244	0.882542
lsm-4	WBGene00003078	protein_coding	F32A5.7	0.272686	0.433135
lsm-5	WBGene00003079	protein_coding	F28F8.3	0.0458753	0.942828
lsm-6	WBGene00003080	protein_coding	Y71G12B.14	-0.145125	0.707697
lsm-7	WBGene00003081	protein_coding	ZK593.7	0.0616053	0.902506
lsm-8	WBGene00003082	protein_coding	Y73B6BL.32	0.0870379	0.865836
lst-1	WBGene00003083	protein_coding	T22A3.3	0.368526	0.511327
lst-2	WBGene00003084	protein_coding	R160.7	-0.0931207	0.731561
lst-3	WBGene00003085	protein_coding	Y37A1B.1	0.306286	0.227669
lst-4	WBGene00003086	protein_coding	Y37A1B.2	0.236125	0.383151
lsy-2	WBGene00003087	protein_coding	F49H12.1	-0.00776477	0.993637
ltd-1	WBGene00003089	protein_coding	K02C4.4	-0.151162	0.660465
lys-1	WBGene00003090	protein_coding	Y22F5A.4	-0.143281	0.786645
lys-2	WBGene00003091	protein_coding	Y22F5A.5	0.0999112	0.914531
lys-3	WBGene00003092	protein_coding	Y22F5A.6	0.182745	0.791036
lys-4	WBGene00003093	protein_coding	F58B3.1	-1.34246	1.21567e-05
lys-5	WBGene00003094	protein_coding	F58B3.2	-0.673225	0.188778
lys-6	WBGene00003095	protein_coding	F58B3.3	-0.201817	0.822053
lys-7	WBGene00003096	protein_coding	C02A12.4	0.112632	0.903269
lys-8	WBGene00003097	protein_coding	C17G10.5	-0.4514	0.282884
lys-9	WBGene00003098	protein_coding	C54C8.6	0.210615	0.293909
lys-10	WBGene00003099	protein_coding	F17E9.11	-1.39558	0.000257558
mab-3	WBGene00003100	protein_coding	Y53C12B.5	-0.0795648	0.944642
mab-5	WBGene00003102	protein_coding	C08C3.3	-0.330459	0.370364
mab-7	WBGene00003104	protein_coding	ZC13.4	0.650288	0.193055
mab-9	WBGene00003106	protein_coding	T27A1.6	-0.322152	0.407683
mab-10	WBGene00003107	protein_coding	R166.1	0.884537	0.0339912
mab-20	WBGene00003111	protein_coding	Y71G12B.20	0.171399	0.661326
mab-21	WBGene00003112	protein_coding	F35G12.6	0.0736152	0.884927
mab-23	WBGene00003114	protein_coding	C32C4.5	-0.122995	0.904764
mac-1	WBGene00003119	protein_coding	Y48C3A.7	-0.168057	0.434243
mag-1	WBGene00003123	protein_coding	R09B3.5	0.378053	0.0647741
mai-1	WBGene00003124	protein_coding	K10B3.9	0.143821	0.830129
map-1	WBGene00003129	protein_coding	Y37E11AL.7	-0.0578856	0.909525
map-2	WBGene00003130	protein_coding	Y116A8A.9	0.13597	0.653814
mat-1	WBGene00003132	protein_coding	Y110A7A.17	0.315154	0.0761489
mat-2	WBGene00003133	protein_coding	W10C6.1	0.187712	0.682916
mat-3	WBGene00003134	protein_coding	F10C5.1	0.204206	0.645407
mau-2	WBGene00003136	protein_coding	C09H6.3	0.169892	0.639702
mau-8	WBGene00003142	protein_coding	Y62E10A.8	0.162694	0.653392
max-1	WBGene00003143	protein_coding	C34B4.1	-0.105376	0.749947
max-2	WBGene00003144	protein_coding	Y38F1A.10	0.163211	0.45897
mbf-1	WBGene00003148	protein_coding	H21P03.1	0.747288	1.52178e-05
mbk-1	WBGene00003149	protein_coding	T04C10.1	0.019125	0.97112
mbk-2	WBGene00003150	protein_coding	F49E11.1	0.145111	0.656959
mca-1	WBGene00003151	protein_coding	W09C2.3	0.189389	0.773597
mca-3	WBGene00003153	protein_coding	Y67D8C.10	-0.091725	0.791733
mcm-2	WBGene00003154	protein_coding	Y17G7B.5	0.182424	0.821636
mcm-3	WBGene00003155	protein_coding	C25D7.6	0.289419	0.638255
mcm-4	WBGene00003156	protein_coding	Y39G10AR.14	0.240782	0.719032
mcm-5	WBGene00003157	protein_coding	R10E4.4	0.305988	0.613487
mcm-6	WBGene00003158	protein_coding	ZK632.1	0.155874	0.803134
mcm-7	WBGene00003159	protein_coding	F32D1.10	0.592373	0.288162
[truncated: 18,449 more rows]

## Sheet: DP degron 300mM vs 50mM EtOH
L1 mRNA-seq derived from P0 DP degron control (EtOH) mothers exposed to 300mM NaCl compared to 50mM NaCl
gene name	gene ID	type	cosmid	log2FC 300mM vs 50mM	FDR
aap-1	WBGene00000001	protein_coding	Y110A7A.10	0.171287	0.361309
aat-1	WBGene00000002	protein_coding	F27C8.1	-0.0330688	0.931691
aat-2	WBGene00000003	protein_coding	F07C3.7	0.153014	0.514523
aat-3	WBGene00000004	protein_coding	F52H2.2	-0.25826	0.268797
aat-4	WBGene00000005	protein_coding	T13A10.10	0.660901	0.144639
aat-5	WBGene00000006	protein_coding	C55C2.5	-0.313495	0.231957
aat-6	WBGene00000007	protein_coding	T11F9.4	0.791478	0.0199681
aat-7	WBGene00000008	protein_coding	F54D12.3	-0.470716	0.300845
aat-8	WBGene00000009	protein_coding	F28F9.4	1.3406	0.000485584
aat-9	WBGene00000010	protein_coding	Y53H1C.1	0.338912	0.157311
abf-1	WBGene00000012	protein_coding	C50F2.9	0.302676	NA
abf-2	WBGene00000013	protein_coding	C50F2.10	0.233322	0.679137
abf-3	WBGene00000014	protein_coding	F54B8.5	0.0298099	NA
abf-4	WBGene00000015	protein_coding	Y38H6C.22	-0.897797	NA
abf-5	WBGene00000016	protein_coding	T22H6.5	-0.279532	0.512334
abf-6	WBGene00000017	protein_coding	T22H6.7	-0.219686	0.600018
abl-1	WBGene00000018	protein_coding	M79.1	0.0810206	0.656263
abt-1	WBGene00000019	protein_coding	C24F3.5	0.116849	NA
abt-2	WBGene00000020	protein_coding	F12B6.1	0.0636347	0.844344
abt-4	WBGene00000022	protein_coding	Y39D8C.1	0.0636178	0.887389
abt-5	WBGene00000023	protein_coding	Y53C10A.9	-0.0302591	NA
abu-1	WBGene00000024	protein_coding	AC3.3	0.019744	NA
abu-2	WBGene00000025	protein_coding	F19G12.7	-0.0385769	NA
abu-3	WBGene00000026	protein_coding	F31A3.1	0.0557847	NA
abu-4	WBGene00000027	protein_coding	Y5H2A.3	-0.1632	NA
abu-5	WBGene00000028	protein_coding	Y105C5A.4	-0.0534682	NA
abu-6	WBGene00000029	protein_coding	C03A7.7	0.0234547	NA
abu-7	WBGene00000030	protein_coding	C03A7.8	-0.00539492	NA
abu-8	WBGene00000031	protein_coding	C03A7.14	0.234192	NA
abu-9	WBGene00000032	protein_coding	R09F10.2	-0.0813414	NA
abu-10	WBGene00000033	protein_coding	F35A5.3	-0.0965641	NA
abu-11	WBGene00000034	protein_coding	T01D1.6	0.493537	NA
ace-1	WBGene00000035	protein_coding	W09B12.1	-0.0403556	0.91631
ace-2	WBGene00000036	protein_coding	Y44E3A.2	-0.078887	0.63607
ace-3	WBGene00000037	protein_coding	Y48B6A.8	-0.141781	0.699529
ace-4	WBGene00000038	protein_coding	Y48B6A.7	0.0283626	0.956471
acn-1	WBGene00000039	protein_coding	C42D8.5	0.0366046	0.944902
aco-1	WBGene00000040	protein_coding	ZK455.1	0.39015	0.0554707
aco-2	WBGene00000041	protein_coding	F54H12.1	0.282435	0.169768
acr-2	WBGene00000042	protein_coding	K11G12.2	-0.254359	0.414965
acr-3	WBGene00000043	protein_coding	K11G12.7	-0.217458	0.667193
acr-5	WBGene00000044	protein_coding	K03F8.2	-0.326186	0.228765
acr-6	WBGene00000045	protein_coding	ZK973.5	-0.214096	0.70815
acr-7	WBGene00000046	protein_coding	T09A5.3	-0.167114	0.586397
acr-8	WBGene00000047	protein_coding	ZC504.2	0.214192	0.391218
acr-9	WBGene00000048	protein_coding	C40C9.2	0.222168	0.578916
acr-10	WBGene00000049	protein_coding	R02E12.8	0.0601886	0.923479
acr-11	WBGene00000050	protein_coding	D2092.3	0.0389351	0.947416
acr-12	WBGene00000051	protein_coding	R01E6.4	-0.205627	0.507251
acr-14	WBGene00000053	protein_coding	T05C12.2	-0.36219	0.448281
acr-15	WBGene00000054	protein_coding	F25G6.4	-0.518679	0.13774
acr-16	WBGene00000055	protein_coding	F25G6.3	-0.16367	0.594736
acr-17	WBGene00000056	protein_coding	F53E10.2	-0.2754	0.535387
acr-18	WBGene00000057	protein_coding	F28F8.1	-0.0104645	0.984028
acr-19	WBGene00000058	protein_coding	C31H5.3	-0.301195	0.207421
acr-20	WBGene00000059	protein_coding	R06A4.10	-0.315293	0.399335
acr-21	WBGene00000060	protein_coding	F27B3.2	-0.564803	0.0325544
lgc-11	WBGene00000061	protein_coding	F48E3.7	-0.121257	0.831259
acr-23	WBGene00000062	protein_coding	F59B1.9	0.0263162	0.949993
act-1	WBGene00000063	protein_coding	T04C12.6	-0.0734676	0.887976
act-2	WBGene00000064	protein_coding	T04C12.5	-0.0250836	0.964027
act-3	WBGene00000065	protein_coding	T04C12.4	-0.0672443	0.893529
act-4	WBGene00000066	protein_coding	M03F4.2	0.0457085	0.934227
act-5	WBGene00000067	protein_coding	T25C8.2	-0.0400668	0.922479
acy-1	WBGene00000068	protein_coding	F17C8.1	-0.380916	0.0670749
acy-2	WBGene00000069	protein_coding	C10F3.3	0.163077	0.533701
acy-3	WBGene00000070	protein_coding	C44F1.5	0.315358	0.0736386
acy-4	WBGene00000071	protein_coding	T01C2.1	-0.0827958	0.822704
add-1	WBGene00000072	protein_coding	F39C12.2	-0.0826779	0.734703
add-2	WBGene00000073	protein_coding	F57F5.4	0.0225437	0.951982
adm-2	WBGene00000074	protein_coding	C04A11.4	0.176401	0.455427
adm-4	WBGene00000075	protein_coding	ZK154.7	-0.0668935	0.800246
adr-1	WBGene00000079	protein_coding	H15N14.1	0.24339	0.229932
adr-2	WBGene00000080	protein_coding	T20H4.4	-0.0294106	0.921381
ads-1	WBGene00000081	protein_coding	Y50D7A.7	0.189203	0.515339
adt-1	WBGene00000082	protein_coding	C02B4.1	-0.253453	0.441506
adt-2	WBGene00000083	protein_coding	F08C6.1	0.192463	0.377494
aex-1	WBGene00000084	protein_coding	D2030.10	0.116519	0.744648
aex-2	WBGene00000085	protein_coding	T14B1.2	-0.465722	0.139003
aex-3	WBGene00000086	protein_coding	C02H7.3	-0.160393	0.47441
aex-5	WBGene00000088	protein_coding	F32A7.6	-0.00590793	0.986713
aex-6	WBGene00000089	protein_coding	Y87G2A.4	-0.453909	0.0375312
age-1	WBGene00000090	protein_coding	B0334.8	0.106724	0.618456
ags-3	WBGene00000092	protein_coding	F32A6.4	-0.211535	0.299166
agt-1	WBGene00000093	protein_coding	Y62E10A.5	0.089339	0.83277
agt-2	WBGene00000094	protein_coding	F09E5.13	0.0495117	0.902139
aha-1	WBGene00000095	protein_coding	C25A1.11	-0.288974	0.0640899
ahr-1	WBGene00000096	protein_coding	C41G7.5	-0.389375	0.134156
aip-1	WBGene00000097	protein_coding	F58E10.4	-0.201459	0.525358
air-1	WBGene00000098	protein_coding	K07C11.2	-0.027989	0.958867
air-2	WBGene00000099	protein_coding	B0207.4	0.44454	0.373107
ajm-1	WBGene00000100	protein_coding	C25A11.4	-0.0708898	0.801495
aka-1	WBGene00000101	protein_coding	D1022.7	0.00271722	0.990795
akt-1	WBGene00000102	protein_coding	C12D8.10	-0.125886	0.544349
akt-2	WBGene00000103	protein_coding	F28H6.1	-0.29876	0.231957
alg-1	WBGene00000105	protein_coding	F48F7.1	0.0702787	0.812416
alg-2	WBGene00000106	protein_coding	T07D3.7	0.0143069	0.967753
alh-1	WBGene00000107	protein_coding	F54D8.3	0.761337	0.000560737
alh-2	WBGene00000108	protein_coding	K04F1.15	0.119267	NA
alh-3	WBGene00000109	protein_coding	F36H1.6	-0.00182824	0.994586
alh-4	WBGene00000110	protein_coding	T05H4.13	-0.161101	0.588133
alh-5	WBGene00000111	protein_coding	T08B1.3	1.00241	2.56683e-07
alh-6	WBGene00000112	protein_coding	F56D12.1	-0.0606619	0.85335
alh-7	WBGene00000113	protein_coding	F45H10.1	0.0653516	0.743888
alh-8	WBGene00000114	protein_coding	F13D12.4	0.214857	0.503319
alh-9	WBGene00000115	protein_coding	F01F1.6	-0.221359	0.278058
alh-10	WBGene00000116	protein_coding	C54D1.4	0.0417712	0.905263
alh-11	WBGene00000117	protein_coding	F42G9.5	0.380572	0.113949
alh-12	WBGene00000118	protein_coding	Y69F12A.2	0.0176968	0.944079
aly-1	WBGene00000120	protein_coding	C01F6.5	0.23507	0.531249
aly-2	WBGene00000121	protein_coding	F23B2.6	0.286959	0.556311
aly-3	WBGene00000122	protein_coding	M18.7	0.0102188	0.965109
ama-1	WBGene00000123	protein_coding	F36A4.7	0.168073	0.586324
amt-1	WBGene00000133	protein_coding	C05E11.4	0.461094	0.329267
amt-2	WBGene00000134	protein_coding	F49E11.3	-0.59282	0.135757
amt-3	WBGene00000135	protein_coding	M195.3	-0.399678	0.219248
amt-4	WBGene00000136	protein_coding	C05E11.5	0.0207356	0.965571
amx-1	WBGene00000137	protein_coding	R13G10.2	0.0472777	0.870136
amx-2	WBGene00000138	protein_coding	B0019.1	-0.126574	0.679661
amx-3	WBGene00000139	protein_coding	F25C8.2	-0.169473	0.551686
anc-1	WBGene00000140	protein_coding	ZK973.6	0.0178157	0.972165
aos-1	WBGene00000142	protein_coding	C08B6.9	0.199184	0.385953
apc-2	WBGene00000143	protein_coding	K06H7.6	0.298945	0.238795
apc-10	WBGene00000144	protein_coding	F15H10.3	0.78025	0.0799054
apc-11	WBGene00000145	protein_coding	F35G12.9	-0.0420641	0.93944
ape-1	WBGene00000146	protein_coding	F46F3.4	0.205453	0.165767
aph-1	WBGene00000147	protein_coding	VF36H2L.1	-0.0150434	0.971108
aph-2	WBGene00000148	protein_coding	ZC434.6	0.384572	0.0874088
apl-1	WBGene00000149	protein_coding	C42D8.8	-0.0329173	0.951598
apm-1	WBGene00000150	protein_coding	F55A12.7	-0.0307642	0.888772
apn-1	WBGene00000151	protein_coding	T05H10.2	0.203148	0.439469
app-1	WBGene00000155	protein_coding	W03G9.4	0.0318436	0.923828
2001-04-01	WBGene00000156	protein_coding	K04G2.8	-0.0317654	0.90843
aps-2	WBGene00000157	protein_coding	F02E8.3	-0.151841	0.564339
apg-1	WBGene00000158	protein_coding	Y105E8A.9	-0.137306	0.274333
aps-1	WBGene00000159	protein_coding	F29G9.3	0.255643	0.285867
apb-1	WBGene00000160	protein_coding	Y71H2B.10	-0.0957017	0.712393
apa-2	WBGene00000161	protein_coding	T20B5.1	-0.179492	0.420077
apd-3	WBGene00000162	protein_coding	W09G10.4	0.105582	0.602978
apb-3	WBGene00000163	protein_coding	R11A5.1	-0.155205	0.35211
apm-3	WBGene00000164	protein_coding	F53H8.1	-0.00526705	0.985965
aps-3	WBGene00000165	protein_coding	Y48G8AL.14	-0.0641644	0.875285
apt-9	WBGene00000166	protein_coding	W04G3.4	-0.396694	0.0937677
apx-1	WBGene00000168	protein_coding	K08D9.3	0.518876	0.225699
aqp-1	WBGene00000169	protein_coding	F32A5.5	0.473451	0.0390736
aqp-2	WBGene00000170	protein_coding	C01G6.1	-0.0714621	0.812635
aqp-3	WBGene00000171	protein_coding	Y69E1A.7	0.0308469	NA
aqp-4	WBGene00000172	protein_coding	F40F9.9	0.624776	0.0174764
aqp-5	WBGene00000173	protein_coding	C35A5.1	0.459893	0.347716
aqp-6	WBGene00000174	protein_coding	C32C4.2	-0.62635	0.144639
aqp-7	WBGene00000175	protein_coding	M02F4.8	-0.138173	0.604153
aqp-8	WBGene00000176	protein_coding	K02G10.7	0.110144	0.778034
aqp-9	WBGene00000177	protein_coding	K07A1.16	-0.062733	0.868601
aqp-10	WBGene00000178	protein_coding	ZK1321.3	0.0172292	0.963052
aqp-11	WBGene00000179	protein_coding	ZK525.2	-0.0732376	0.754668
arc-1	WBGene00000180	protein_coding	ZK1320.6	0.0769163	0.705053
ard-1	WBGene00000181	protein_coding	F01G4.2	0.263588	0.14786
arf-1.2	WBGene00000182	protein_coding	B0336.2	-0.113024	0.421289
arf-3	WBGene00000183	protein_coding	F57H12.1	-0.167085	0.135757
arf-6	WBGene00000184	protein_coding	Y116A8C.12	-0.155538	0.46585
arg-1	WBGene00000185	protein_coding	F31A9.3	-0.00544551	0.993704
ark-1	WBGene00000186	protein_coding	C01C7.1	0.0834927	0.700227
arl-1	WBGene00000187	protein_coding	F54C9.10	-0.0916679	0.730259
arl-3	WBGene00000188	protein_coding	F19H8.3	-0.514646	0.0883519
arl-5	WBGene00000189	protein_coding	ZK632.8	-0.211877	0.556653
arf-1.1	WBGene00000190	protein_coding	F45E4.1	0.138367	NA
arl-8	WBGene00000192	protein_coding	Y57G11C.13	-0.171543	0.354929
arl-6	WBGene00000193	protein_coding	C38D4.8	-0.612741	0.0833861
arr-1	WBGene00000195	protein_coding	F53H8.2	0.0440476	0.853857
aars-1	WBGene00000196	protein_coding	W02B12.6	-0.0161436	0.962528
aars-2	WBGene00000197	protein_coding	F28H1.3	0.317292	0.117184
art-1	WBGene00000198	protein_coding	C15F1.6	-0.0171071	0.944319
arx-1	WBGene00000199	protein_coding	Y71F9AL.16	-0.111605	0.431101
arx-2	WBGene00000200	protein_coding	K07C5.1	-0.0371207	0.865733
arx-3	WBGene00000201	protein_coding	Y79H2A.6	-0.148869	0.199265
exos-4.2	WBGene00000202	protein_coding	Y6D11A.1	0.0229158	0.955495
arx-5	WBGene00000203	protein_coding	Y37D8A.1	-0.166971	0.522776
arx-6	WBGene00000204	protein_coding	C35D10.16	-0.130973	0.59973
arx-7	WBGene00000205	protein_coding	M01B12.3	-0.206024	0.470848
asb-1	WBGene00000206	protein_coding	F35G12.10	0.333034	0.431033
asb-2	WBGene00000207	protein_coding	F02E8.1	0.192902	0.428395
asc-1	WBGene00000208	protein_coding	Y53F4B.15	-0.377528	0.0872261
asg-1	WBGene00000209	protein_coding	K07A12.3	-0.0821158	0.691379
asg-2	WBGene00000210	protein_coding	C53B7.4	0.0352211	0.888088
asm-1	WBGene00000211	protein_coding	B0252.2	-0.285232	0.269844
asm-2	WBGene00000212	protein_coding	ZK455.4	1.29092	0.000342601
asm-3	WBGene00000213	protein_coding	W03G1.7	1.01085	0.0179297
asp-1	WBGene00000214	protein_coding	Y39B6A.20	0.523665	0.0389927
asp-2	WBGene00000215	protein_coding	T18H9.2	0.136233	0.618382
asp-3	WBGene00000216	protein_coding	H22K11.1	0.380223	0.141697
asp-4	WBGene00000217	protein_coding	R12H7.2	0.66912	0.0305467
asp-5	WBGene00000218	protein_coding	F21F8.3	0.377652	0.187828
asp-6	WBGene00000219	protein_coding	F21F8.7	0.328844	0.322605
atf-2	WBGene00000220	protein_coding	K08F8.2	0.0551249	0.936743
atf-5	WBGene00000221	protein_coding	T04C10.4	-0.0770096	0.687043
atf-6	WBGene00000222	protein_coding	F45E6.2	0.416789	0.00610541
atf-7	WBGene00000223	protein_coding	C07G2.2	-0.314599	0.0159047
atgp-1	WBGene00000224	protein_coding	F26D10.9	-0.280124	0.19415
atgp-2	WBGene00000225	protein_coding	C38C6.2	-0.508598	0.0123393
atl-1	WBGene00000226	protein_coding	T06E4.3	0.377285	0.106857
atm-1	WBGene00000227	protein_coding	Y48G1BL.2	0.331234	0.207394
atn-1	WBGene00000228	protein_coding	W04D2.1	-0.273927	0.315222
atp-2	WBGene00000229	protein_coding	C34E10.6	0.126975	0.594736
atp-3	WBGene00000230	protein_coding	F27C1.7	0.0903536	0.62431
atx-2	WBGene00000231	protein_coding	D2045.1	0.189732	0.462987
avr-14	WBGene00000232	protein_coding	B0207.12	-0.322759	0.268797
avr-15	WBGene00000233	protein_coding	R11G10.1	-0.00545128	0.989128
baf-1	WBGene00000235	protein_coding	B0464.7	-0.049832	0.902768
bag-1	WBGene00000236	protein_coding	F57B10.11	-0.314238	0.307025
bam-2	WBGene00000237	protein_coding	Y71F9AR.1	0.0618835	0.884642
bar-1	WBGene00000238	protein_coding	C54D1.6	-0.00242789	0.993404
bas-1	WBGene00000239	protein_coding	C05D2.4	0.134829	0.598551
pah-1	WBGene00000240	protein_coding	K08F8.4	-0.380378	0.195249
bbs-1	WBGene00000241	protein_coding	Y105E8A.5	-0.458623	0.206563
bbs-2	WBGene00000242	protein_coding	F20D12.3	-0.417163	0.257085
bbs-8	WBGene00000244	protein_coding	T25F10.5	-0.323589	0.384001
bca-1	WBGene00000245	protein_coding	T13C5.5	-0.293262	0.254882
bcc-1	WBGene00000246	protein_coding	M7.3	-0.176492	0.479596
bec-1	WBGene00000247	protein_coding	T19E7.3	0.17744	0.571655
ben-1	WBGene00000248	protein_coding	C54C6.2	-0.620885	0.000395162
bir-1	WBGene00000249	protein_coding	T27F2.3	0.0706006	0.839661
bir-2	WBGene00000250	protein_coding	C50B8.2	1.208	0.00352053
bli-1	WBGene00000251	protein_coding	C09G5.6	0.16086	0.757696
bli-2	WBGene00000252	protein_coding	F59E12.12	0.156843	0.801365
bli-3	WBGene00000253	protein_coding	F56C11.1	0.368542	0.0123745
bli-4	WBGene00000254	protein_coding	K04F10.4	0.151935	0.290643
bli-5	WBGene00000255	protein_coding	F45G2.5	-0.112891	NA
bli-6	WBGene00000256	protein_coding	Y73B6BL.34	-0.125549	NA
bmk-1	WBGene00000257	protein_coding	F23B12.8	1.05182	0.00860036
bpl-1	WBGene00000259	protein_coding	F13H8.10	-0.131711	0.406035
bra-1	WBGene00000262	protein_coding	F54B11.6	-0.436666	0.222219
F23H11.5	WBGene00000263	protein_coding	F23H11.5	-0.0239222	0.908521
brc-1	WBGene00000264	protein_coding	C36A4.8	0.425789	0.204378
brd-1	WBGene00000265	protein_coding	K04C2.4	0.72914	0.0795171
bre-1	WBGene00000266	protein_coding	C53B4.7	-0.205914	0.282942
bre-2	WBGene00000267	protein_coding	Y39E4B.9	0.0935206	0.80444
bre-3	WBGene00000268	protein_coding	B0464.4	0.155019	0.25149
bre-4	WBGene00000269	protein_coding	Y73E7A.7	0.0949946	0.707551
bre-5	WBGene00000270	protein_coding	T12G3.8	0.414931	0.142515
brf-1	WBGene00000271	protein_coding	F45E12.2	-0.0642159	0.742359
bro-1	WBGene00000272	protein_coding	F56A3.5	0.366431	0.483313
brp-1	WBGene00000273	protein_coding	Y79H2A.1	0.0109163	0.979331
btf-1	WBGene00000274	protein_coding	F15D4.1	0.362102	0.0529383
bub-1	WBGene00000275	protein_coding	R06C7.8	0.399262	0.342974
byn-1	WBGene00000276	protein_coding	F57B9.5	0.158919	0.366048
cab-1	WBGene00000277	protein_coding	C23H4.1	-0.317701	0.22282
cah-1	WBGene00000279	protein_coding	F54D8.4	-0.187515	0.584783
cah-2	WBGene00000280	protein_coding	D1022.8	-0.530568	0.0600808
cah-3	WBGene00000281	protein_coding	K05G3.3	-0.424467	0.0118182
cah-4	WBGene00000282	protein_coding	R01E6.3	-0.421468	0.143138
cah-5	WBGene00000283	protein_coding	R173.1	0.338141	0.233517
cah-6	WBGene00000284	protein_coding	T28F2.3	-0.586998	0.0708122
cal-1	WBGene00000285	protein_coding	C13C12.1	-0.00272873	0.993825
cal-2	WBGene00000286	protein_coding	C18E9.1	-0.170732	0.485056
cal-3	WBGene00000287	protein_coding	M02B7.6	-0.275612	0.43602
cal-4	WBGene00000288	protein_coding	T07G12.1	-0.327455	0.156884
cam-1	WBGene00000289	protein_coding	C01G6.8	0.109513	0.61684
cap-1	WBGene00000292	protein_coding	D2024.6	-0.260268	0.0242055
cap-2	WBGene00000293	protein_coding	M106.5	-0.287974	0.0125549
cas-1	WBGene00000294	protein_coding	F41G4.2	0.0578825	0.898786
cat-1	WBGene00000295	protein_coding	W01C8.6	-0.416834	0.342744
cat-2	WBGene00000296	protein_coding	B0432.5	-0.400012	0.334251
cat-4	WBGene00000298	protein_coding	F32G8.6	-0.452396	0.036835
cav-1	WBGene00000301	protein_coding	T13F2.8	-0.641212	0.0124045
cav-2	WBGene00000302	protein_coding	C56A3.7	-0.118852	0.667536
cbp-1	WBGene00000366	protein_coding	R10E11.1	0.0288581	0.910239
cca-1	WBGene00000367	protein_coding	C54D2.5	-0.284638	0.256048
ccb-1	WBGene00000368	protein_coding	T28F2.5	-0.500338	0.0082336
ccf-1	WBGene00000369	protein_coding	Y56A3A.20	-0.161286	0.426484
ccg-1	WBGene00000370	protein_coding	Y73F8A.6	-0.0774401	0.529523
cco-1	WBGene00000371	protein_coding	F26E4.9	0.00316484	0.989128
cyp-13A7	WBGene00000372	protein_coding	T10B9.10	0.20101	NA
cyp-14A5	WBGene00000373	protein_coding	F08F3.7	0.883525	1.529e-05
cyp-44A1	WBGene00000375	protein_coding	ZK177.5	0.337464	0.243919
ccr-4	WBGene00000376	protein_coding	ZC518.3	0.172679	0.42881
cct-1	WBGene00000377	protein_coding	T05C12.7	-0.307787	0.0615079
cct-2	WBGene00000378	protein_coding	T21B10.7	-0.242724	0.209717
cct-4	WBGene00000379	protein_coding	K01C8.10	-0.180911	0.274835
cct-5	WBGene00000380	protein_coding	C07G2.3	-0.181007	0.228508
cct-6	WBGene00000381	protein_coding	F01F1.8	-0.432006	0.0189292
cdc-6	WBGene00000382	protein_coding	C43E11.10	0.285916	0.394929
cdc-14	WBGene00000383	protein_coding	C17G10.4	0.0396637	0.862988
cdc-25.1	WBGene00000386	protein_coding	K06A5.7	0.523946	0.202664
cdc-25.2	WBGene00000387	protein_coding	F16B4.8	0.51111	0.0834588
cdc-25.3	WBGene00000388	protein_coding	ZK637.11	0.017857	NA
cdc-25.4	WBGene00000389	protein_coding	R05H5.2	0	NA
cdc-42	WBGene00000390	protein_coding	R07G3.1	-0.0527158	0.741145
cdd-1	WBGene00000391	protein_coding	C47D2.2	-0.471469	0.0383972
cdd-2	WBGene00000392	protein_coding	F49E8.4	0.306605	0.483713
cdf-1	WBGene00000393	protein_coding	C15B12.7	-0.282138	0.189721
cdh-3	WBGene00000395	protein_coding	ZK112.7	-0.320021	0.340284
cdh-4	WBGene00000396	protein_coding	F25F2.2	-0.0643226	0.791456
cdh-5	WBGene00000397	protein_coding	F08B4.2	0.101501	0.875285
cdh-7	WBGene00000399	protein_coding	R05H10.6	-0.116566	0.835593
cdh-9	WBGene00000401	protein_coding	F59C12.1	-0.273033	0.443026
cdh-10	WBGene00000402	protein_coding	C45G7.5	-0.0672334	0.887579
casy-1	WBGene00000403	protein_coding	B0034.3	-0.426348	0.131968
cdk-1	WBGene00000405	protein_coding	T05G5.3	0.628251	0.175938
cdk-4	WBGene00000406	protein_coding	F18H3.5	0.103875	0.727815
cdk-5	WBGene00000407	protein_coding	T27E9.3	-0.185354	0.21174
cdk-7	WBGene00000408	protein_coding	Y39G10AL.3	-0.0179408	0.960892
cdk-8	WBGene00000409	protein_coding	F39H11.3	0.169189	0.44963
cdk-9	WBGene00000410	protein_coding	H25P06.2	-0.127152	0.485056
cdl-1	WBGene00000411	protein_coding	R06F6.1	0.363609	0.399335
cdr-1	WBGene00000412	protein_coding	F35E8.11	0.146851	0.781567
cdt-1	WBGene00000413	protein_coding	Y54E10A.15	0.434856	0.289986
cec-1	WBGene00000414	protein_coding	ZK1236.2	-0.320422	0.0434452
ced-1	WBGene00000415	protein_coding	Y47H9C.4	0.180553	0.321629
ced-2	WBGene00000416	protein_coding	Y41D4B.13	0.0391611	0.919922
ced-3	WBGene00000417	protein_coding	C48D1.2	0.690488	0.0923342
ced-4	WBGene00000418	protein_coding	C35D10.9	0.106959	0.672163
ced-5	WBGene00000419	protein_coding	C02F4.1	0.0641921	0.72725
ced-6	WBGene00000420	protein_coding	F56D2.7	-0.321166	0.0991612
ced-7	WBGene00000421	protein_coding	C48B4.4	-0.0035989	0.989573
ced-8	WBGene00000422	protein_coding	F08F1.5	0.241306	0.668215
ced-9	WBGene00000423	protein_coding	T07C4.8	0.0223532	0.946118
ced-10	WBGene00000424	protein_coding	C09G12.8	-0.14146	0.398316
ced-11	WBGene00000425	protein_coding	ZK512.3	0.0843125	0.849568
ced-12	WBGene00000426	protein_coding	Y106G6E.5	0.219287	0.131574
ced-13	WBGene00000427	protein_coding	R09F10.9	-0.0502847	NA
ceh-1	WBGene00000428	protein_coding	F16H11.4	-0.352438	0.501802
ceh-2	WBGene00000429	protein_coding	C27A12.5	0.30778	0.475876
ceh-5	WBGene00000430	protein_coding	C16C2.1	0.518869	0.277821
ceh-6	WBGene00000431	protein_coding	K02B12.1	-0.299104	0.249782
ceh-7	WBGene00000432	protein_coding	C34C6.8	-0.0991641	NA
ceh-8	WBGene00000433	protein_coding	ZK265.4	0.152997	0.709973
ceh-9	WBGene00000434	protein_coding	Y65B4BR.9	-0.512324	0.280323
ceh-10	WBGene00000435	protein_coding	W03A3.1	0.204289	0.57725
ceh-12	WBGene00000436	protein_coding	F33D11.4	-0.138345	NA
ceh-13	WBGene00000437	protein_coding	R13A5.5	0.150305	0.679549
ceh-14	WBGene00000438	protein_coding	F46C8.5	-0.302776	0.274333
ceh-16	WBGene00000439	protein_coding	C13G5.1	-0.00831262	0.98464
ceh-17	WBGene00000440	protein_coding	D1007.1	0.102164	0.85335
ceh-18	WBGene00000441	protein_coding	ZC64.3	-0.120678	0.568135
ceh-19	WBGene00000442	protein_coding	F20D12.6	0.262222	0.474994
ceh-20	WBGene00000443	protein_coding	F31E3.1	-0.0634409	0.692298
ceh-21	WBGene00000444	protein_coding	T26C11.6	0.308566	0.269642
ceh-22	WBGene00000445	protein_coding	F29F11.5	0.322406	0.420752
ceh-23	WBGene00000446	protein_coding	ZK652.5	-0.791835	0.0213223
ceh-24	WBGene00000447	protein_coding	F55B12.1	-0.275551	0.535409
pros-1	WBGene00000448	protein_coding	K12H4.1	-0.306412	0.165588
ceh-27	WBGene00000449	protein_coding	F46F3.1	-0.444856	0.154325
ceh-28	WBGene00000450	protein_coding	K03A11.3	0.164303	NA
ceh-30	WBGene00000451	protein_coding	C33D12.7	0.00674157	0.990795
ceh-31	WBGene00000452	protein_coding	C33D12.1	-0.404707	0.202879
ceh-32	WBGene00000453	protein_coding	W05E10.3	-0.245943	0.462656
ceh-33	WBGene00000454	protein_coding	C10G8.7	-0.099346	0.85016
ceh-34	WBGene00000455	protein_coding	C10G8.6	-0.0953156	0.852253
ceh-36	WBGene00000457	protein_coding	C37E2.4	-0.471139	0.279025
ceh-37	WBGene00000458	protein_coding	C37E2.5	-0.0947182	0.85335
ceh-38	WBGene00000459	protein_coding	F22D3.1	-0.0734617	0.742943
ceh-39	WBGene00000460	protein_coding	T26C11.7	0.502502	0.0836168
ceh-40	WBGene00000461	protein_coding	F17A2.5	1.02141	0.0166154
ceh-41	WBGene00000462	protein_coding	T26C11.5	0.282388	0.276641
ceh-43	WBGene00000463	protein_coding	C28A5.4	-0.202094	0.542679
ceh-44	WBGene00000464	protein_coding	Y54F10AM.4	-0.334384	0.0811051
cpg-1	WBGene00000465	protein_coding	C07G2.1	0.424427	0.367379
cel-1	WBGene00000466	protein_coding	C03D6.3	0.0404742	0.905912
cep-1	WBGene00000467	protein_coding	F52B5.5	0.95944	0.00373753
ces-1	WBGene00000468	protein_coding	F43G9.11	-0.176711	0.771036
ces-2	WBGene00000469	protein_coding	ZK909.4	0.343926	0.465475
cey-1	WBGene00000472	protein_coding	F33A8.3	-0.21191	0.301111
cey-2	WBGene00000473	protein_coding	F46F11.2	0.369263	0.442909
cey-3	WBGene00000474	protein_coding	M01E11.5	0.431712	0.359061
cey-4	WBGene00000475	protein_coding	Y39A1C.3	0.283685	0.338778
cfi-1	WBGene00000476	protein_coding	T23D8.8	-0.260816	0.339013
cft-1	WBGene00000477	protein_coding	C18C4.2	0.0541566	0.921671
cfz-2	WBGene00000478	protein_coding	F27E11.3	-0.509132	0.0929458
cgh-1	WBGene00000479	protein_coding	C07H6.5	0.526576	0.0991612
cgp-1	WBGene00000480	protein_coding	Y38C9A.2	0.166769	0.491815
cha-1	WBGene00000481	protein_coding	ZC416.8	-0.261689	0.452559
chd-3	WBGene00000482	protein_coding	T14G8.1	0.139832	0.508482
che-1	WBGene00000483	protein_coding	C55B7.12	-0.160265	NA
che-2	WBGene00000484	protein_coding	F38G1.1	-0.179413	0.700987
che-3	WBGene00000485	protein_coding	F18C12.1	-0.291725	0.367379
che-6	WBGene00000487	protein_coding	C23H5.7	0.135356	0.808676
che-7	WBGene00000488	protein_coding	F26D11.10	-0.503777	0.0384377
che-11	WBGene00000490	protein_coding	C27A7.4	-0.171673	0.672155
che-12	WBGene00000491	protein_coding	B0024.8	-0.092796	0.788662
che-13	WBGene00000492	protein_coding	F59C6.7	-0.60702	0.0510002
che-14	WBGene00000493	protein_coding	F56H1.1	0.238699	0.570318
chs-1	WBGene00000496	protein_coding	T25G3.2	0.421486	0.401547
chs-2	WBGene00000497	protein_coding	F48A11.1	0.0341022	0.956278
chk-1	WBGene00000498	protein_coding	Y39H10A.7	0.490504	0.156884
chk-2	WBGene00000499	protein_coding	Y60A3A.12	0.206253	0.496544
chn-1	WBGene00000500	protein_coding	T09B4.10	0.0704488	0.764754
cho-1	WBGene00000501	protein_coding	C48D1.3	-0.451368	0.153649
chp-1	WBGene00000502	protein_coding	Y110A7A.13	-0.11471	0.631089
cht-1	WBGene00000503	protein_coding	C04F6.3	0.511299	0.281082
cic-1	WBGene00000506	protein_coding	H14E04.5	0.150428	0.574974
cit-1.1	WBGene00000507	protein_coding	F44B9.4	0.230395	0.365615
cit-1.2	WBGene00000508	protein_coding	F44B9.3	0.0550739	0.846646
cka-1	WBGene00000509	protein_coding	C28D4.2	-0.310245	0.0200772
cka-2	WBGene00000510	protein_coding	C52B9.1	-0.235456	0.2196
ckb-1	WBGene00000511	protein_coding	B0285.8	0.199303	0.481161
ckb-2	WBGene00000512	protein_coding	B0285.9	-0.349709	0.0730687
ckb-3	WBGene00000513	protein_coding	B0285.10	0.943029	0.0288338
ckb-4	WBGene00000514	protein_coding	F22F7.5	-0.561514	0.00720784
ckc-1	WBGene00000515	protein_coding	T27A10.3	-0.19438	0.430128
cki-1	WBGene00000516	protein_coding	T05A6.1	-0.095678	0.571617
cki-2	WBGene00000517	protein_coding	T05A6.2	0.222319	0.271454
ckk-1	WBGene00000518	protein_coding	C05H8.1	-0.357363	0.027922
cku-70	WBGene00000519	protein_coding	Y47D3A.4	0.241127	0.350684
cku-80	WBGene00000520	protein_coding	R07E5.8	0.398664	0.150751
cky-1	WBGene00000521	protein_coding	C15C8.2	0.0738198	NA
clc-1	WBGene00000522	protein_coding	C09F12.1	-0.228925	0.42163
clc-2	WBGene00000523	protein_coding	C01C10.1	-0.263098	0.391221
clc-3	WBGene00000524	protein_coding	ZK563.4	-0.491303	0.0597949
clc-4	WBGene00000525	protein_coding	T05A10.2	-0.288472	0.561353
clc-5	WBGene00000526	protein_coding	C01C10.4	-0.398256	0.0782146
cle-1	WBGene00000527	protein_coding	C36B1.1	-0.136242	0.422955
clh-1	WBGene00000528	protein_coding	T27D12.2	0.157938	0.538443
clh-2	WBGene00000529	protein_coding	B0491.8	-0.430308	0.0911717
clh-3	WBGene00000530	protein_coding	E04F6.11	-0.0262896	0.944189
clh-4	WBGene00000531	protein_coding	T06F4.2	0.806688	0.0403746
clh-5	WBGene00000532	protein_coding	C07H4.2	-0.00585015	0.98028
clh-6	WBGene00000533	protein_coding	R07B7.1	0.395583	0.0174201
cpi-2	WBGene00000534	protein_coding	R01B10.1	0.0499972	0.812546
cpi-1	WBGene00000535	protein_coding	K08B4.6	-0.0727402	0.888378
clk-1	WBGene00000536	protein_coding	ZC395.2	-0.252337	0.275758
clk-2	WBGene00000537	protein_coding	C07H6.6	0.24992	0.30943
cln-3.1	WBGene00000539	protein_coding	F07B10.1	0.184435	0.716352
cln-3.2	WBGene00000540	protein_coding	C01G8.2	-0.097958	0.702932
cln-3.3	WBGene00000541	protein_coding	ZC190.1	0.422938	0.196516
clp-1	WBGene00000542	protein_coding	C06G4.2	-0.191113	0.35306
clp-2	WBGene00000543	protein_coding	T04A8.16	0.0949019	0.750681
clp-3	WBGene00000544	protein_coding	Y47H10A.1	0.531363	0.267873
clp-4	WBGene00000545	protein_coding	Y39A3CL.5	0.0208316	0.939102
clp-6	WBGene00000546	protein_coding	Y77E11A.10	0.877633	0.0396633
clp-7	WBGene00000547	protein_coding	Y77E11A.11	0.0203805	0.940763
clr-1	WBGene00000548	protein_coding	F56D1.4	0.190675	0.0874071
cls-2	WBGene00000549	protein_coding	R107.6	0.324658	0.302821
clu-1	WBGene00000550	protein_coding	F55H2.6	-0.142459	0.520403
clx-1	WBGene00000551	protein_coding	C50F7.2	1.37298	0.000230555
cmd-1	WBGene00000552	protein_coding	T21H3.3	-0.206957	0.465543
cmk-1	WBGene00000553	protein_coding	K07A9.2	-0.661973	0.00470367
cnb-1	WBGene00000554	protein_coding	F55C10.1	-0.350129	0.0304921
cnc-1	WBGene00000555	protein_coding	R09B5.2	0	NA
cnc-2	WBGene00000556	protein_coding	R09B5.3	-0.046161	NA
cnc-3	WBGene00000557	protein_coding	R09B5.8	0.451467	NA
cnc-4	WBGene00000558	protein_coding	R09B5.9	0.358447	0.48959
cnc-5	WBGene00000559	protein_coding	R09B5.10	NA	NA
cnc-6	WBGene00000560	protein_coding	Y46E12A.1	0.567368	0.22282
cnd-1	WBGene00000561	protein_coding	C34E10.7	-0.729653	0.0851111
cng-1	WBGene00000562	protein_coding	F14H8.6	-0.283167	0.527892
cng-3	WBGene00000563	protein_coding	F38E11.12	0.160706	0.68523
cnk-1	WBGene00000564	protein_coding	R01H10.8	-0.155758	0.506623
cnt-1	WBGene00000565	protein_coding	Y17G7B.15	-0.0334854	0.891515
cnt-2	WBGene00000566	protein_coding	Y39A1A.15	0.0346088	0.915772
cnx-1	WBGene00000567	protein_coding	ZK632.6	0.00416657	0.98365
cof-2	WBGene00000583	protein_coding	C48E7.5	0.825418	0.0397582
cog-1	WBGene00000584	protein_coding	R03C1.3	0.0258926	0.93944
cogc-2	WBGene00000585	protein_coding	C06G3.10	0.381761	0.0668274
coh-1	WBGene00000591	protein_coding	K08A8.3	0.162778	0.485056
coh-3	WBGene00000592	protein_coding	F08H9.1	0.761616	0.0899521
col-2	WBGene00000593	protein_coding	W01B6.7	0.0603191	NA
col-3	WBGene00000594	protein_coding	T28C6.6	0.129382	0.734061
col-7	WBGene00000596	protein_coding	C15A11.5	-0.172901	NA
col-8	WBGene00000597	protein_coding	F11H8.3	-0.146452	0.799276
col-9	WBGene00000598	protein_coding	F54B11.1	0.0629775	NA
col-10	WBGene00000599	protein_coding	B0222.8	0.0411733	0.923047
col-12	WBGene00000601	protein_coding	F15H10.1	-0.109955	0.81026
col-13	WBGene00000602	protein_coding	F15H10.2	-0.100062	0.83338
col-14	WBGene00000603	protein_coding	C46A5.3	0.717922	0.104322
col-17	WBGene00000606	protein_coding	F11G11.10	-0.0117047	NA
col-19	WBGene00000608	protein_coding	ZK1193.1	0.0490749	0.920434
col-20	WBGene00000609	protein_coding	F11G11.11	0.00339854	0.991961
col-33	WBGene00000610	protein_coding	F36A4.6	-0.00183696	NA
col-34	WBGene00000611	protein_coding	F36A4.10	-0.399464	0.191123
col-35	WBGene00000612	protein_coding	C15A11.1	0.123232	0.847492
col-36	WBGene00000613	protein_coding	C27H5.5	0.175704	NA
col-37	WBGene00000614	protein_coding	ZK863.2	-0.0596072	NA
col-38	WBGene00000615	protein_coding	F54C9.4	0.384158	NA
col-39	WBGene00000616	protein_coding	C09G5.4	-0.292718	0.243278
col-40	WBGene00000617	protein_coding	T13B5.4	-0.0135973	NA
col-41	WBGene00000618	protein_coding	T10B10.1	0.260619	0.631135
col-43	WBGene00000620	protein_coding	ZC513.8	0	NA
col-44	WBGene00000621	protein_coding	F54B11.2	0.483868	0.321251
col-45	WBGene00000622	protein_coding	F53G12.7	0.676904	NA
col-46	WBGene00000623	protein_coding	Y18H1A.13	0.131949	NA
col-47	WBGene00000624	protein_coding	Y18H1A.12	-0.218466	NA
col-48	WBGene00000625	protein_coding	Y54E10BL.2	0.0677851	0.910794
col-49	WBGene00000626	protein_coding	K09H9.3	-0.079653	0.905896
col-50	WBGene00000627	protein_coding	T28F2.6	0.095339	NA
col-51	WBGene00000628	protein_coding	T28F2.8	0.188465	NA
col-52	WBGene00000629	protein_coding	D1007.2	-0.0672468	0.921163
col-53	WBGene00000630	protein_coding	M01A12.1	-0.283479	0.481193
col-54	WBGene00000631	protein_coding	F33D11.3	0.0540272	NA
col-55	WBGene00000632	protein_coding	T05E7.2	-0.0838233	NA
col-56	WBGene00000633	protein_coding	T08B2.2	-0.0489141	NA
col-58	WBGene00000634	protein_coding	F26B1.4	0.266151	NA
col-60	WBGene00000636	protein_coding	F22D6.10	0.398496	NA
col-61	WBGene00000637	protein_coding	C01H6.1	-0.835917	0.043282
col-62	WBGene00000638	protein_coding	C15A11.6	-0.388059	0.434483
col-63	WBGene00000639	protein_coding	ZK265.2	-0.332865	NA
col-64	WBGene00000640	protein_coding	F52F12.2	-0.249259	0.640179
col-65	WBGene00000641	protein_coding	K08C9.4	0.398079	0.339795
col-68	WBGene00000644	protein_coding	C50D2.4	-0.399236	NA
col-69	WBGene00000645	protein_coding	K01A2.7	1.11	0.00568457
col-70	WBGene00000646	protein_coding	H17B01.2	0.132195	NA
col-71	WBGene00000647	protein_coding	Y49F6B.10	0.604187	0.175426
col-72	WBGene00000648	protein_coding	W09G10.1	0.00126854	0.998162
col-73	WBGene00000649	protein_coding	F11G11.12	0.208053	NA
col-74	WBGene00000650	protein_coding	ZK1248.2	-0.337513	0.510493
col-75	WBGene00000651	protein_coding	K03H9.2	-0.00288802	NA
col-76	WBGene00000652	protein_coding	M110.1	0.88372	0.0125089
col-77	WBGene00000653	protein_coding	M195.1	0.41069	0.420365
col-78	WBGene00000654	protein_coding	W07A12.5	-0.283738	0.594949
col-79	WBGene00000655	protein_coding	C09G5.3	-0.0595892	0.920063
col-80	WBGene00000656	protein_coding	C09G5.5	0.354102	0.332469
col-81	WBGene00000657	protein_coding	F38A3.1	0.113563	0.856635
col-83	WBGene00000658	protein_coding	F33A8.9	-0.327767	0.529547
col-84	WBGene00000659	protein_coding	K12D12.3	0.185496	0.746193
col-85	WBGene00000660	protein_coding	T21B4.2	-0.00224811	NA
col-86	WBGene00000661	protein_coding	Y81G3A.5	0.414776	NA
col-87	WBGene00000662	protein_coding	Y39G8C.4	-0.0148609	0.983679
col-88	WBGene00000663	protein_coding	W05G11.3	0.060206	NA
col-89	WBGene00000664	protein_coding	F17C8.2	-0.390047	0.344466
col-90	WBGene00000665	protein_coding	C29E4.1	0.153494	0.680632
col-91	WBGene00000666	protein_coding	F09G8.6	0.746473	0.000166711
col-92	WBGene00000667	protein_coding	W05B2.6	0.144425	0.598986
col-93	WBGene00000668	protein_coding	W05B2.5	0.203535	0.440121
col-94	WBGene00000669	protein_coding	W05B2.1	0.115187	0.676008
col-95	WBGene00000670	protein_coding	Y41C4A.16	0.115067	0.814692
col-96	WBGene00000671	protein_coding	Y41C4A.19	1.20006	0.00257869
col-97	WBGene00000672	protein_coding	ZK1010.7	0.2179	0.699046
col-98	WBGene00000673	protein_coding	F14F7.1	0.388967	0.430033
col-99	WBGene00000674	protein_coding	F29C4.8	0.155679	0.690064
col-101	WBGene00000675	protein_coding	K02D7.3	0.816424	0.0544081
col-102	WBGene00000676	protein_coding	C18H7.3	0.0415459	NA
col-103	WBGene00000677	protein_coding	F56B3.1	0.379115	0.440081
col-104	WBGene00000678	protein_coding	F58F6.1	0.756374	0.0573354
col-105	WBGene00000679	protein_coding	F58F6.2	-0.31737	NA
col-106	WBGene00000680	protein_coding	Y77E11A.15	0.035397	0.951598
col-107	WBGene00000681	protein_coding	C34H4.4	0.0581802	0.900601
col-108	WBGene00000682	protein_coding	Y41D4A.2	1.88278	2.56683e-07
col-109	WBGene00000683	protein_coding	Y38C1BA.3	0.169496	0.782476
col-110	WBGene00000684	protein_coding	F19C7.7	0.0104153	0.98464
col-111	WBGene00000685	protein_coding	F29B9.9	0.590571	0.141697
col-113	WBGene00000687	protein_coding	C34D4.15	0.0643578	0.91703
col-114	WBGene00000688	protein_coding	D2024.8	0.455514	NA
col-115	WBGene00000689	protein_coding	Y42H9B.1	0.163762	0.791612
col-116	WBGene00000690	protein_coding	F17E9.1	-0.0903039	NA
col-117	WBGene00000691	protein_coding	T28C6.4	0.134131	0.726574
col-118	WBGene00000692	protein_coding	T11B7.3	-0.58806	0.0286076
col-119	WBGene00000693	protein_coding	C53B4.5	-0.0397454	0.949796
col-120	WBGene00000694	protein_coding	Y11D7A.11	0.164683	0.790862
col-121	WBGene00000695	protein_coding	F56D5.1	-0.649984	NA
col-122	WBGene00000696	protein_coding	T05A1.2	0.0102543	0.985965
col-123	WBGene00000697	protein_coding	W08D2.6	0.214961	0.515831
col-124	WBGene00000698	protein_coding	C24F3.6	0.136482	0.802668
col-125	WBGene00000699	protein_coding	C29F4.1	-0.194026	0.673506
col-126	WBGene00000700	protein_coding	F54D1.2	1.52649	9.62597e-05
col-127	WBGene00000701	protein_coding	F54D1.3	0.450581	0.367387
col-128	WBGene00000702	protein_coding	F12F6.9	-0.0269338	NA
col-129	WBGene00000703	protein_coding	M18.1	0.0187174	0.979905
col-130	WBGene00000704	protein_coding	F08G5.4	0.032836	0.95199
col-131	WBGene00000705	protein_coding	C39E9.3	-0.00441225	NA
col-132	WBGene00000706	protein_coding	C39E9.9	-0.426877	NA
col-133	WBGene00000707	protein_coding	F52B11.4	-0.285163	NA
col-135	WBGene00000708	protein_coding	M199.5	-0.00759842	NA
col-137	WBGene00000710	protein_coding	Y51H4A.9	0.0279203	NA
col-138	WBGene00000711	protein_coding	C52D10.13	0.201313	NA
col-139	WBGene00000712	protein_coding	F41F3.4	0.0974124	0.861943
col-140	WBGene00000713	protein_coding	F26F12.1	0.0208055	0.964027
col-141	WBGene00000714	protein_coding	T15B7.5	1.07008	0.00759079
col-142	WBGene00000715	protein_coding	T15B7.4	0.280282	0.609965
col-143	WBGene00000716	protein_coding	T15B7.3	-0.00472427	0.992925
col-144	WBGene00000717	protein_coding	B0222.6	0.0612317	0.881095
col-145	WBGene00000718	protein_coding	B0222.7	0.219836	0.526826
col-146	WBGene00000719	protein_coding	T06E4.6	0.321558	0.166147
col-147	WBGene00000720	protein_coding	T06E4.4	0.297437	0.228504
col-148	WBGene00000721	protein_coding	C12D8.8	-0.13903	NA
col-149	WBGene00000722	protein_coding	B0024.1	0.0659239	0.923047
col-150	WBGene00000723	protein_coding	B0024.2	-0.084279	0.877465
col-151	WBGene00000724	protein_coding	AC3.6	0.554931	NA
col-152	WBGene00000725	protein_coding	F32G8.5	0.229601	NA
col-153	WBGene00000726	protein_coding	F17C11.3	-0.338482	0.442651
col-154	WBGene00000727	protein_coding	F55C10.2	-0.26335	0.478751
col-155	WBGene00000728	protein_coding	F55C10.3	-0.101518	0.801491
col-156	WBGene00000729	protein_coding	F57B7.3	0.277955	NA
col-157	WBGene00000730	protein_coding	T11F9.9	-0.200452	0.727445
col-158	WBGene00000731	protein_coding	D2023.7	-0.30144	NA
col-159	WBGene00000732	protein_coding	F57B1.3	0.406364	0.138969
col-160	WBGene00000733	protein_coding	F57B1.4	0.300184	0.316145
col-161	WBGene00000734	protein_coding	C50B6.4	-0.11533	NA
col-162	WBGene00000735	protein_coding	Y2H9A.3	-0.0457759	NA
col-163	WBGene00000736	protein_coding	F46B3.17	0.394668	NA
col-164	WBGene00000737	protein_coding	T21D9.1	-0.0612272	NA
col-165	WBGene00000738	protein_coding	F14H12.1	0.0526685	0.937118
col-166	WBGene00000739	protein_coding	T07H6.3	0.119332	0.729494
col-167	WBGene00000740	protein_coding	T10E10.2	0.206825	0.61684
col-168	WBGene00000741	protein_coding	T10E10.1	0.193317	0.63252
col-169	WBGene00000742	protein_coding	T10E10.5	0.0915987	0.863333
col-170	WBGene00000743	protein_coding	T10E10.6	0.140885	0.759488
col-171	WBGene00000744	protein_coding	T10E10.7	0.161351	0.690064
col-172	WBGene00000745	protein_coding	F38B6.5	0.349385	0.488289
col-173	WBGene00000746	protein_coding	F41C6.5	0.161373	NA
col-174	WBGene00000747	protein_coding	F46C8.2	0.195703	0.727963
col-175	WBGene00000748	protein_coding	C35B8.1	0.166997	NA
col-176	WBGene00000749	protein_coding	ZC373.7	0.531925	0.26072
col-177	WBGene00000750	protein_coding	F59F3.2	-0.417564	0.268463
col-178	WBGene00000751	protein_coding	C34F6.2	-0.0074836	0.989836
col-179	WBGene00000752	protein_coding	C34F6.3	0.0233129	0.958982
col-180	WBGene00000753	protein_coding	C44C10.1	0.23382	0.619839
col-181	WBGene00000754	protein_coding	W03G11.1	0.116987	0.824213
col-182	WBGene00000755	protein_coding	R09A8.4	-0.121832	NA
col-183	WBGene00000756	protein_coding	F02D10.1	0.032674	NA
col-184	WBGene00000757	protein_coding	F15A2.1	0.00784197	0.988696
col-185	WBGene00000758	protein_coding	H06A10.2	-0.391474	NA
col-186	WBGene00000759	protein_coding	E03G2.4	-0.586045	0.175748
col-187	WBGene00000760	protein_coding	C30F2.1	0.125481	NA
coq-1	WBGene00000761	protein_coding	C24A11.9	-0.161007	0.345436
coq-2	WBGene00000762	protein_coding	F57B9.4	-0.0220546	0.940873
coq-3	WBGene00000763	protein_coding	Y57G11C.11	0.0181379	0.940842
coq-4	WBGene00000764	protein_coding	T03F1.2	-0.203518	0.402765
coq-5	WBGene00000765	protein_coding	ZK652.9	-0.242041	0.418863
coq-6	WBGene00000766	protein_coding	K07B1.2	-0.0260689	0.912172
coq-8	WBGene00000767	protein_coding	C35D10.4	-0.026894	0.927494
cor-1	WBGene00000768	protein_coding	R01H10.3	-0.0241252	0.937938
cpb-1	WBGene00000770	protein_coding	C40H1.1	0.666063	0.1468
cpb-2	WBGene00000771	protein_coding	C30B5.3	0.260116	NA
cpb-3	WBGene00000772	protein_coding	B0414.5	0.703903	0.122396
cpf-1	WBGene00000773	protein_coding	F28C6.3	0.313713	0.320279
cpf-2	WBGene00000774	protein_coding	F56A8.6	0.00982759	0.978441
cpin-1	WBGene00000775	protein_coding	F38E11.3	-0.0881168	0.856843
cpl-1	WBGene00000776	protein_coding	T03E6.7	0.11116	0.767325
cpn-1	WBGene00000777	protein_coding	F43G9.9	0.0703064	0.869375
cpn-2	WBGene00000778	protein_coding	D1069.2	-0.188577	0.731639
cpn-3	WBGene00000779	protein_coding	F28H1.2	-0.0592812	0.866754
cpn-4	WBGene00000780	protein_coding	F49D11.8	-0.129621	0.79379
cpr-1	WBGene00000781	protein_coding	C52E4.1	-0.0481525	0.944319
cpr-2	WBGene00000782	protein_coding	F36D3.9	0.0739836	NA
cpr-3	WBGene00000783	protein_coding	T10H4.12	0.127169	0.62431
cpr-4	WBGene00000784	protein_coding	F44C4.3	0.194209	0.733809
cpr-5	WBGene00000785	protein_coding	W07B8.5	0.667141	0.141661
cpr-6	WBGene00000786	protein_coding	C25B8.3	0.61055	0.0396577
cps-6	WBGene00000787	protein_coding	C41D11.8	0.672478	0.0028626
cpz-1	WBGene00000788	protein_coding	F32B5.8	0.172317	0.655331
cpz-2	WBGene00000789	protein_coding	M04G12.2	0.552729	0.0277657
crb-1	WBGene00000792	protein_coding	F11C7.4	0.183878	0.560341
crh-1	WBGene00000793	protein_coding	Y41C4A.4	-0.285836	0.131005
crn-1	WBGene00000794	protein_coding	Y47G6A.8	0.279818	0.541056
crn-2	WBGene00000795	protein_coding	CD4.2	-0.0654778	0.835593
crn-3	WBGene00000796	protein_coding	C14A4.4	-0.0865417	0.721702
crn-4	WBGene00000797	protein_coding	AH9.2	0.325683	0.521338
crn-5	WBGene00000798	protein_coding	C14A4.5	-0.284869	0.326971
crn-6	WBGene00000799	protein_coding	K04H4.6	0.301798	0.391669
cars-1	WBGene00000800	protein_coding	Y23H5A.7	0.0745857	0.767325
crt-1	WBGene00000802	protein_coding	Y38A10A.5	-0.43038	0.0592362
csb-1	WBGene00000803	protein_coding	F53H4.1	0.0453498	0.902471
csc-1	WBGene00000804	protein_coding	Y48E1B.12	0.579155	0.219091
csk-1	WBGene00000812	protein_coding	Y48G1C.2	0.0607242	0.756623
csn-1	WBGene00000813	protein_coding	Y59A8A.1	0.00502424	0.986713
csn-2	WBGene00000814	protein_coding	B0025.2	-0.0176503	0.95521
csn-3	WBGene00000815	protein_coding	Y38C1AA.2	0.0983279	0.67299
csn-4	WBGene00000816	protein_coding	Y55F3AM.15	-0.315371	0.0802704
csn-5	WBGene00000817	protein_coding	B0547.1	0.10856	0.706664
csn-6	WBGene00000818	protein_coding	Y67H2A.6	0.135291	0.520517
csp-1	WBGene00000819	protein_coding	Y48E1B.13	0.22452	0.695912
csp-2	WBGene00000820	protein_coding	Y73B6BL.7	0.986195	5.33377e-05
csp-3	WBGene00000821	protein_coding	Y47H9C.6	0.1915	NA
csq-1	WBGene00000822	protein_coding	F40E10.3	-0.137856	0.576637
ctb-1	WBGene00000829	protein_coding	MTCE.21	-0.325578	0.20746
ctl-1	WBGene00000830	protein_coding	Y54G11A.6	0.581139	0.0446197
ctl-2	WBGene00000831	protein_coding	Y54G11A.5	0.488318	0.100965
ctn-1	WBGene00000832	protein_coding	Y23H5A.5	-0.272298	0.248108
cts-1	WBGene00000833	protein_coding	T20G5.2	0.107824	0.719424
cua-1	WBGene00000834	protein_coding	Y76A2A.2	0.0952992	0.676925
cuc-1	WBGene00000835	protein_coding	ZK652.11	-0.474117	0.105602
cul-1	WBGene00000836	protein_coding	D2045.6	0.0640592	0.717201
cul-2	WBGene00000837	protein_coding	ZK520.4	-0.0194109	0.940121
cul-3	WBGene00000838	protein_coding	Y108G3AL.1	0.0489267	0.88138
cul-4	WBGene00000839	protein_coding	F45E12.3	0.00718438	0.982134
cul-5	WBGene00000840	protein_coding	ZK856.1	0.163928	0.350818
cul-6	WBGene00000841	protein_coding	K08E7.7	-0.0569356	0.911635
cup-2	WBGene00000843	protein_coding	F25D7.1	-0.352101	0.0477706
cup-4	WBGene00000845	protein_coding	C02C2.3	0.784468	0.0306063
cup-5	WBGene00000846	protein_coding	R13A5.1	0.0722979	0.77978
cut-1	WBGene00000851	protein_coding	C47G2.1	-0.0864428	NA
cut-6	WBGene00000853	protein_coding	M142.2	0.423	0.404009
cux-7	WBGene00000854	protein_coding	C07H6.8	-0.152082	0.587142
cwn-1	WBGene00000857	protein_coding	K10B4.6	-0.26826	0.359061
cwn-2	WBGene00000858	protein_coding	W01B6.1	0.163773	0.587958
cwp-1	WBGene00000859	protein_coding	C37H5.10	-0.0490807	NA
cwp-2	WBGene00000860	protein_coding	C37H5.11	0.0875565	NA
cwp-3	WBGene00000861	protein_coding	C37H5.4	0.0317253	NA
cwp-4	WBGene00000862	protein_coding	K11D12.1	-0.439189	0.166316
cya-1	WBGene00000863	protein_coding	ZK507.6	0.470756	0.101137
cya-2	WBGene00000864	protein_coding	F59H6.7	0.742388	0.0800406
cyb-1	WBGene00000865	protein_coding	ZC168.4	0.272818	0.618689
cyb-2.1	WBGene00000866	protein_coding	Y43E12A.1	0.67848	0.137551
cyb-2.2	WBGene00000867	protein_coding	H31G24.4	0.469871	0.339464
cyb-3	WBGene00000868	protein_coding	T06E6.2	0.398528	0.419102
cyc-1	WBGene00000869	protein_coding	C54G4.8	0.224052	0.197172
cyd-1	WBGene00000870	protein_coding	Y38F1A.5	0.322438	0.160793
cye-1	WBGene00000871	protein_coding	C37A2.4	0.872901	0.0246878
cyk-1	WBGene00000872	protein_coding	F11H8.4	0.434343	0.0118893
cyk-3	WBGene00000874	protein_coding	ZK328.1	-0.110128	0.537744
cyk-4	WBGene00000875	protein_coding	K08E3.6	0.900593	0.0232185
cyl-1	WBGene00000876	protein_coding	C52E4.6	-0.0168923	0.961918
cyn-1	WBGene00000877	protein_coding	Y49A3A.5	0.0238101	0.941908
cyn-2	WBGene00000878	protein_coding	ZK520.5	0.160567	0.782542
cyn-3	WBGene00000879	protein_coding	Y75B12B.5	-0.113072	0.463725
cyn-4	WBGene00000880	protein_coding	F59E10.2	-0.198029	0.388504
cyn-5	WBGene00000881	protein_coding	F31C3.1	0.236055	0.196516
cyn-6	WBGene00000882	protein_coding	F42G9.2	0.158289	0.627615
cyn-7	WBGene00000883	protein_coding	Y75B12B.2	0.0752525	0.711981
cyn-8	WBGene00000884	protein_coding	D1009.2	0.349857	0.113913
cyn-9	WBGene00000885	protein_coding	T27D1.1	0.789343	0.0651588
cyn-10	WBGene00000886	protein_coding	B0252.4	0.111443	0.806522
cyn-11	WBGene00000887	protein_coding	T01B7.4	-0.0809636	0.813421
cyn-12	WBGene00000888	protein_coding	C34D4.12	-0.00705913	0.98365
cyn-13	WBGene00000889	protein_coding	Y116A8C.34	-0.00486329	0.987726
sig-7	WBGene00000890	protein_coding	F39H2.2	-0.0549228	0.867649
cyn-15	WBGene00000891	protein_coding	Y87G2A.6	0.0480916	0.910674
cyn-16	WBGene00000892	protein_coding	Y17G7B.9	-0.208821	0.351727
cyn-17	WBGene00000893	protein_coding	ZC250.1	-0.66343	0.148701
dab-1	WBGene00000894	protein_coding	M110.5	0.0352307	0.875884
dac-1	WBGene00000895	protein_coding	B0412.1	-0.0584189	0.925681
dad-1	WBGene00000896	protein_coding	F57B10.10	0.092748	0.697033
daf-1	WBGene00000897	protein_coding	F29C4.1	-0.310602	0.181433
daf-2	WBGene00000898	protein_coding	Y55D5A.5	-0.243454	0.200322
daf-3	WBGene00000899	protein_coding	F25E2.5	-0.210633	0.241812
daf-4	WBGene00000900	protein_coding	C05D2.1	-0.0958751	0.650916
daf-5	WBGene00000901	protein_coding	W01G7.1	0.0694033	0.845992
daf-6	WBGene00000902	protein_coding	F31F6.5	-0.294705	0.485056
daf-7	WBGene00000903	protein_coding	B0412.2	-0.102304	0.876202
daf-8	WBGene00000904	protein_coding	R05D11.1	-0.47569	0.00426332
daf-9	WBGene00000905	protein_coding	T13C5.1	-0.153884	0.77978
daf-10	WBGene00000906	protein_coding	F23B2.4	-0.226934	0.577186
daf-11	WBGene00000907	protein_coding	B0240.3	-0.42265	0.245114
daf-12	WBGene00000908	protein_coding	F11A1.3	-0.115694	0.443693
daf-14	WBGene00000910	protein_coding	F01G10.8	-0.213434	0.218622
daf-15	WBGene00000911	protein_coding	C10C5.6	-0.00567725	0.976527
daf-16	WBGene00000912	protein_coding	R13H8.1	-0.156279	0.555864
daf-18	WBGene00000913	protein_coding	T07A9.6	0.0634334	0.906744
daf-19	WBGene00000914	protein_coding	F33H1.1	-0.243469	0.2196
daf-21	WBGene00000915	protein_coding	C47E8.5	-0.352524	0.177846
daf-25	WBGene00000917	protein_coding	Y48G1A.3	-0.0449782	0.899502
daf-28	WBGene00000920	protein_coding	Y116F11B.1	-0.359306	0.462669
dao-2	WBGene00000928	protein_coding	M03A1.7	-0.0857656	NA
dao-3	WBGene00000929	protein_coding	K07E3.3	0.610213	0.0174201
dao-4	WBGene00000930	protein_coding	ZC373.6	-0.186483	NA
dao-5	WBGene00000931	protein_coding	C25A1.10	0.0924511	0.780586
dao-6	WBGene00000932	protein_coding	T05G5.12	0.396485	0.429395
dap-3	WBGene00000933	protein_coding	C14A4.2	-0.037917	0.909943
dat-1	WBGene00000934	protein_coding	T23G5.5	-0.574004	0.144646
daz-1	WBGene00000935	protein_coding	F56D1.7	0.51585	0.280326
dbl-1	WBGene00000936	protein_coding	T25F10.2	0.146549	0.510453
dbr-1	WBGene00000937	protein_coding	C55B7.8	0.239748	0.415494
dcp-66	WBGene00000938	protein_coding	C26C6.5	-0.106647	0.549876
dcr-1	WBGene00000939	protein_coding	K12H4.8	0.0354995	0.9133
dcs-1	WBGene00000940	protein_coding	Y113G7A.9	0.235159	0.3989
ddp-1	WBGene00000941	protein_coding	Y39A3CR.4	-0.1373	0.508371
deb-1	WBGene00000942	protein_coding	ZC477.9	-0.0807653	0.838007
deg-1	WBGene00000950	protein_coding	C47C12.6	-0.334919	0.144234
deg-3	WBGene00000951	protein_coding	K03B8.9	-0.384672	0.198333
del-1	WBGene00000952	protein_coding	E02H4.1	-0.43719	0.203029
del-2	WBGene00000953	protein_coding	F58G6.6	-0.347609	0.339315
des-2	WBGene00000955	protein_coding	T26H10.1	-0.444687	0.0633246
dgk-1	WBGene00000958	protein_coding	C09E10.2	-0.478899	0.0838106
dgk-2	WBGene00000959	protein_coding	F46H6.2	-0.0911538	0.60937
dgk-3	WBGene00000960	protein_coding	F54G8.2	-0.398074	0.391199
dgn-1	WBGene00000961	protein_coding	T21B6.1	0.358027	0.0826938
dhc-1	WBGene00000962	protein_coding	T21E12.4	0.429908	0.0447508
dhp-1	WBGene00000963	protein_coding	R06C7.3	1.25697	3.55375e-17
dhp-2	WBGene00000964	protein_coding	C47E12.8	-0.407734	0.0284372
dhs-1	WBGene00000965	protein_coding	C01G8.3	0.0382106	0.91631
dhs-2	WBGene00000966	protein_coding	F55A12.4	-0.156542	0.703275
dhs-3	WBGene00000967	protein_coding	T02E1.5	0.15236	0.637559
dhs-4	WBGene00000968	protein_coding	T05F1.10	0.305255	0.379569
dhs-5	WBGene00000969	protein_coding	F56D1.5	-0.640612	0.057382
dhs-6	WBGene00000970	protein_coding	C17G10.8	-0.294624	0.282957
dhs-7	WBGene00000971	protein_coding	E04F6.7	0.468846	0.165276
dhs-8	WBGene00000972	protein_coding	K10H10.3	-0.163764	0.790862
dhs-9	WBGene00000973	protein_coding	Y32H12A.3	-0.153857	0.608819
dhs-11	WBGene00000974	protein_coding	Y39A1A.11	0.822052	0.0631216
dhs-12	WBGene00000975	protein_coding	K08F4.9	0.0387319	0.90755
dhs-13	WBGene00000976	protein_coding	F36H9.3	0.199151	0.285115
dhs-14	WBGene00000977	protein_coding	R05D8.8	1.25673	8.99683e-05
dhs-15	WBGene00000978	protein_coding	R05D8.10	-0.210563	0.613367
dhs-16	WBGene00000979	protein_coding	C10F3.2	0.140755	NA
dhs-17	WBGene00000980	protein_coding	F29G9.6	-0.0874116	0.710638
dhs-18	WBGene00000981	protein_coding	C45B11.3	0.0143231	0.977184
dhs-19	WBGene00000982	protein_coding	T11F9.11	-0.244757	0.334251
dhs-20	WBGene00000983	protein_coding	F35B12.2	-0.412644	0.125137
dhs-21	WBGene00000984	protein_coding	R11D1.11	0.767917	0.00763907
dhs-22	WBGene00000985	protein_coding	C15H11.4	-0.0456122	0.865854
dhs-23	WBGene00000986	protein_coding	R08H2.1	-0.0914631	0.890383
dhs-24	WBGene00000987	protein_coding	Y60A3A.10	0.0479545	0.822634
dhs-25	WBGene00000988	protein_coding	F09E10.3	-0.469064	0.0671764
dhs-26	WBGene00000989	protein_coding	ZK816.5	0.0637763	0.925363
dhs-27	WBGene00000990	protein_coding	C04F6.5	-0.176063	0.69112
dhs-28	WBGene00000991	protein_coding	M03A8.1	-0.0509988	0.858505
dhs-29	WBGene00000992	protein_coding	F27D9.6	-0.182068	0.464423
dhs-30	WBGene00000993	protein_coding	T25G12.7	-0.370408	0.0900093
dic-1	WBGene00000994	protein_coding	F08B4.1	0.126686	0.733879
die-1	WBGene00000995	protein_coding	C18D1.1	-0.0316348	0.929598
dif-1	WBGene00000996	protein_coding	F49E8.5	-0.564753	0.0173715
dig-1	WBGene00000998	protein_coding	K07E12.1	-0.149119	0.60705
dim-1	WBGene00001000	protein_coding	C18A11.7	-0.315555	0.120814
dis-3	WBGene00001001	protein_coding	C04G2.6	-0.0972343	0.739636
div-1	WBGene00001002	protein_coding	R01H10.1	0.341604	0.377408
dlc-1	WBGene00001005	protein_coding	T26A5.9	0.15796	0.180127
dlg-1	WBGene00001006	protein_coding	C25F6.2	0.101548	0.684915
dli-1	WBGene00001007	protein_coding	C39E9.14	-0.0944698	0.687043
dlk-1	WBGene00001008	protein_coding	F33E2.2	-0.390234	0.0356599
dna-2	WBGene00001016	protein_coding	F43G6.1	0.755528	0.0833861
dnc-1	WBGene00001017	protein_coding	ZK593.5	0.0297254	0.861813
dnc-2	WBGene00001018	protein_coding	C28H8.12	-0.0373687	0.908183
dnj-1	WBGene00001019	protein_coding	B0035.14	-0.146148	0.324584
dnj-2	WBGene00001020	protein_coding	B0035.2	0.0452212	0.920966
dnj-3	WBGene00001021	protein_coding	C01G10.12	0.205731	0.653731
dnj-4	WBGene00001022	protein_coding	C01G8.4	-0.00767967	0.986713
dnj-5	WBGene00001023	protein_coding	C04A2.7	0.0712545	0.745767
dnj-7	WBGene00001025	protein_coding	C55B6.2	-0.687854	7.03299e-05
dnj-8	WBGene00001026	protein_coding	C56C10.13	0.0421641	0.82845
dnj-9	WBGene00001027	protein_coding	F11G11.7	0.0188149	0.9254
dnj-10	WBGene00001028	protein_coding	F22B7.5	-0.043282	0.892117
dnj-11	WBGene00001029	protein_coding	F38A5.13	0.134822	0.6944
dnj-12	WBGene00001030	protein_coding	F39B2.10	-0.422366	0.024165
dnj-13	WBGene00001031	protein_coding	F54D5.8	-0.335073	0.526826
dnj-14	WBGene00001032	protein_coding	K02G10.8	0.0223165	0.917951
dnj-15	WBGene00001033	protein_coding	K08D10.2	-0.093228	0.790862
dnj-16	WBGene00001034	protein_coding	R74.4	-0.416734	0.00603369
dnj-17	WBGene00001035	protein_coding	T03F6.2	-0.0152697	0.971694
dnj-18	WBGene00001036	protein_coding	T04A8.9	0.160825	0.496549
dnj-19	WBGene00001037	protein_coding	T05C3.5	-0.512623	0.0224396
dnj-20	WBGene00001038	protein_coding	T15H9.7	-0.0400626	0.860419
dnj-21	WBGene00001039	protein_coding	T19B4.4	-0.164284	0.687587
dnj-22	WBGene00001040	protein_coding	T23B12.7	0.337063	0.416881
dnj-23	WBGene00001041	protein_coding	T24H10.3	0.0791377	0.819321
dnj-24	WBGene00001042	protein_coding	W03A5.7	0.341898	0.0355593
dnj-25	WBGene00001043	protein_coding	W07A8.3	-0.0277132	0.880514
dnj-26	WBGene00001044	protein_coding	Y39C12A.8	0.577198	0.22282
dnj-27	WBGene00001045	protein_coding	Y47H9C.5	-0.171703	0.584246
dnj-28	WBGene00001046	protein_coding	Y54E10BL.4	-0.0859023	0.822154
dnj-29	WBGene00001047	protein_coding	Y63D3A.6	-0.109876	0.507432
dnj-30	WBGene00001048	protein_coding	Y71F9B.16	0.136321	0.700923
dog-1	WBGene00001049	protein_coding	F33H2.1	0.608933	0.0699032
dom-3	WBGene00001050	protein_coding	F54C1.2	0.353498	0.203029
cks-1	WBGene00001051	protein_coding	C09G4.3	0.748477	0.0271149
dop-1	WBGene00001052	protein_coding	F15A8.5	-0.216956	0.417986
dop-2	WBGene00001053	protein_coding	K09G1.4	-0.534346	0.1127
dpf-1	WBGene00001054	protein_coding	T23F1.7	-0.143623	0.550749
dpf-2	WBGene00001055	protein_coding	C27C12.7	-0.319969	0.225481
dpf-3	WBGene00001056	protein_coding	K02F2.1	0.289903	0.0827294
dpf-4	WBGene00001057	protein_coding	F01F1.5	-0.109417	0.555008
dpf-5	WBGene00001058	protein_coding	R11E3.8	-0.0304061	0.912814
dpf-6	WBGene00001059	protein_coding	F44B9.1	1.07355	0.00096515
dpf-7	WBGene00001060	protein_coding	R11E3.7	0.130485	0.600304
dpl-1	WBGene00001061	protein_coding	T23G7.1	0.727522	0.00361732
dpr-1	WBGene00001062	protein_coding	R10D12.2	-0.231287	0.67948
dpy-1	WBGene00001063	protein_coding	M01E10.2	0.637469	0.16546
dpy-2	WBGene00001064	protein_coding	T14B4.6	0.553766	NA
dpy-3	WBGene00001065	protein_coding	EGAP7.1	0.0114404	NA
dpy-4	WBGene00001066	protein_coding	Y41E3.2	-0.0390951	0.955999
dpy-5	WBGene00001067	protein_coding	F27C1.8	-0.0110736	NA
dpy-6	WBGene00001068	protein_coding	F16F9.2	0.755	0.0010681
dpy-7	WBGene00001069	protein_coding	F46C8.6	0.0766044	NA
dpy-8	WBGene00001070	protein_coding	C31H2.2	-0.0730441	0.915332
dpy-9	WBGene00001071	protein_coding	T21D12.2	0.347257	NA
dpy-10	WBGene00001072	protein_coding	T14B4.7	-0.403997	NA
dpy-11	WBGene00001073	protein_coding	F46E10.9	0.0194831	0.940237
dpy-13	WBGene00001074	protein_coding	F30B5.1	-0.140299	NA
dpy-14	WBGene00001075	protein_coding	H27M09.4	-0.30705	0.532099
dpy-17	WBGene00001076	protein_coding	F54D8.1	0.141949	0.800702
dpy-18	WBGene00001077	protein_coding	Y47D3B.10	-0.0285202	0.961375
dpy-19	WBGene00001078	protein_coding	F22B7.10	-0.488939	0.0517694
dpy-20	WBGene00001079	protein_coding	T22B3.1	0.136037	NA
dpy-21	WBGene00001080	protein_coding	Y59A8B.1	0.0298398	0.933916
dpy-22	WBGene00001081	protein_coding	F47A4.2	0.091988	0.581825
dpy-23	WBGene00001082	protein_coding	R160.1	-0.254337	0.309017
dpy-26	WBGene00001085	protein_coding	C25G4.5	0.0559558	0.801365
dpy-27	WBGene00001086	protein_coding	R13G10.1	-0.132377	0.379803
dpy-28	WBGene00001087	protein_coding	Y39A1B.3	-0.246912	0.0275609
dpy-30	WBGene00001088	protein_coding	ZK863.6	-0.0691049	0.738418
dre-1	WBGene00001089	protein_coding	K04A8.6	-0.0720951	0.666157
drh-1	WBGene00001090	protein_coding	F15B10.2	0.609059	0.024865
dro-1	WBGene00001092	protein_coding	F53A2.5	0.39049	0.268155
drp-1	WBGene00001093	protein_coding	T12E12.4	0.0899423	0.645564
dars-1	WBGene00001094	protein_coding	B0464.1	0.0626903	0.725297
dars-2	WBGene00001095	protein_coding	F10C2.6	0.530453	0.106691
dsc-1	WBGene00001096	protein_coding	C18B12.3	-0.196752	0.689039
dsc-4	WBGene00001099	protein_coding	K02D7.4	-0.651333	0.0096092
dsh-1	WBGene00001101	protein_coding	C34F11.9	-0.0294063	0.868576
dsh-2	WBGene00001102	protein_coding	C27A2.6	0.314371	0.445274
dsl-1	WBGene00001103	protein_coding	W09G12.4	0.261497	NA
dsl-2	WBGene00001104	protein_coding	W09G12.1	0.1834	0.756623
dsl-3	WBGene00001105	protein_coding	Y41D4B.10	0.203092	0.725973
dsl-4	WBGene00001106	protein_coding	F16B12.2	0.236798	0.666052
dsl-5	WBGene00001107	protein_coding	F58B3.8	-0.722859	NA
dsl-6	WBGene00001108	protein_coding	H02I12.4	-0.223315	NA
dsl-7	WBGene00001109	protein_coding	F15B9.9	0.44369	0.0920485
duo-1	WBGene00001110	protein_coding	F38B7.5	1.19232	0.00156556
duo-3	WBGene00001112	protein_coding	Y106G6H.12	0.313881	0.238795
dur-1	WBGene00001113	protein_coding	F25H8.5	-0.115958	0.666157
dyb-1	WBGene00001115	protein_coding	F47G6.1	-0.307699	0.151238
dyc-1	WBGene00001116	protein_coding	C33G3.1	-0.197098	0.366247
dyf-1	WBGene00001117	protein_coding	F54C1.5	-0.365983	0.245826
dyf-2	WBGene00001118	protein_coding	ZK520.3	-0.105691	0.681077
dyf-3	WBGene00001119	protein_coding	C04C3.5	-0.463144	0.227047
dyf-5	WBGene00001121	protein_coding	M04C9.5	-0.42481	0.161571
dyf-6	WBGene00001122	protein_coding	F46F6.4	-0.255791	0.387058
dyf-7	WBGene00001123	protein_coding	C43C3.3	-0.107031	0.869347
dyf-11	WBGene00001127	protein_coding	C02H7.1	-0.588245	0.0356748
dyf-13	WBGene00001129	protein_coding	C27H5.7	-0.357663	0.303259
dyn-1	WBGene00001130	protein_coding	C02C6.1	-0.272808	0.471956
dys-1	WBGene00001131	protein_coding	F15D3.1	0.343878	0.129377
alp-1	WBGene00001132	protein_coding	T11B7.4	-0.568596	0.0792025
eat-2	WBGene00001133	protein_coding	Y48B6A.4	-0.149574	0.812511
eat-3	WBGene00001134	protein_coding	D2013.5	-0.0766836	0.681347
eat-4	WBGene00001135	protein_coding	ZK512.6	-0.512002	0.0402846
eat-5	WBGene00001136	protein_coding	F13G3.8	-0.114606	0.840367
eat-6	WBGene00001137	protein_coding	B0365.3	-0.206888	0.404009
eat-16	WBGene00001145	protein_coding	C16C2.2	-0.410498	0.0211836
eat-18	WBGene00001147	protein_coding	Y105E8A.7	-0.0559961	0.867788
eat-20	WBGene00001148	protein_coding	H30A04.1	0.59221	0.0719284
bcat-1	WBGene00001149	protein_coding	K02A4.1	-0.319101	0.0632096
ech-1	WBGene00001150	protein_coding	C29F3.1	-0.406982	0.340509
ech-2	WBGene00001151	protein_coding	F38H4.8	-0.0910967	0.703944
ech-3	WBGene00001152	protein_coding	F43H9.1	-0.401619	0.0930736
ech-4	WBGene00001153	protein_coding	R06F6.9	-0.126384	0.666823
ech-5	WBGene00001154	protein_coding	F56B3.5	0.0312051	0.924579
ech-6	WBGene00001155	protein_coding	T05G5.6	-0.0292795	0.93073
ech-7	WBGene00001156	protein_coding	Y105E8A.4	1.00058	0.00115713
ech-8	WBGene00001157	protein_coding	F01G10.2	-0.199186	0.57725
ech-9	WBGene00001158	protein_coding	F01G10.3	-0.729291	0.0736386
eff-1	WBGene00001159	protein_coding	C26D10.5	0.00530855	0.990584
efk-1	WBGene00001160	protein_coding	F42A10.4	0.198648	0.553965
efl-1	WBGene00001161	protein_coding	Y102A5C.18	0.862101	0.000447535
efl-2	WBGene00001162	protein_coding	Y48C3A.17	-0.0561353	0.854619
efn-2	WBGene00001163	protein_coding	C43F9.8	-0.141883	0.680957
efn-3	WBGene00001164	protein_coding	F15A2.5	0.0666309	NA
efn-4	WBGene00001165	protein_coding	F56A11.3	-0.352741	0.2103
eftu-2	WBGene00001166	protein_coding	ZK328.2	0.178553	0.62831
eef-2	WBGene00001167	protein_coding	F25H5.4	0.231533	0.186662
eef-1A.1	WBGene00001168	protein_coding	F31E3.5	0.271854	0.310294
eef-1A.2	WBGene00001169	protein_coding	R03G5.1	0.241661	0.318754
egl-1	WBGene00001170	protein_coding	F23B12.9	0.0505335	NA
egl-2	WBGene00001171	protein_coding	F16B3.1	-0.56542	0.00831098
egl-3	WBGene00001172	protein_coding	C51E3.7	-0.316167	0.41468
egl-4	WBGene00001173	protein_coding	F55A8.2	-0.0994035	0.598999
egl-5	WBGene00001174	protein_coding	C08C3.1	-0.241385	0.484086
egl-6	WBGene00001175	protein_coding	C46F4.1	-0.475775	0.109612
egl-8	WBGene00001177	protein_coding	B0348.4	-0.165024	0.295143
egl-9	WBGene00001178	protein_coding	F22E12.4	-0.248637	0.508081
egl-10	WBGene00001179	protein_coding	F28C1.2	-0.202915	0.342567
egl-13	WBGene00001182	protein_coding	T22B7.1	-0.148675	0.533099
egl-15	WBGene00001184	protein_coding	F58A3.2	-0.018946	0.940121
egl-17	WBGene00001185	protein_coding	F38G1.2	0.789862	0.0467839
egl-18	WBGene00001186	protein_coding	F55A8.1	-0.31585	0.0975201
egl-19	WBGene00001187	protein_coding	C48A7.1	-0.373397	0.103659
egl-20	WBGene00001188	protein_coding	W08D2.1	-0.612086	0.0264284
egl-21	WBGene00001189	protein_coding	F01D4.4	-0.268273	0.42163
egl-23	WBGene00001190	protein_coding	Y37A1B.11	-0.630985	0.00833693
egl-26	WBGene00001193	protein_coding	C23H3.1	0.025866	0.926796
egl-27	WBGene00001194	protein_coding	C04A2.3	-0.131612	0.32096
egl-30	WBGene00001196	protein_coding	M01D7.7	-0.0901532	0.756623
egl-36	WBGene00001202	protein_coding	R07A4.1	-0.367554	0.286138
egl-38	WBGene00001204	protein_coding	C04G2.7	-0.232735	0.397575
egl-43	WBGene00001207	protein_coding	R53.3	-0.274809	0.214814
egl-44	WBGene00001208	protein_coding	F28B12.2	-0.109487	0.342651
egl-45	WBGene00001209	protein_coding	C27D11.1	0.153316	0.543264
egl-46	WBGene00001210	protein_coding	K11G9.4	-0.310069	0.508631
egl-47	WBGene00001211	protein_coding	C50H2.2	-0.187978	0.577531
ego-1	WBGene00001214	protein_coding	F26A3.3	0.814262	0.0285652
ego-2	WBGene00001215	protein_coding	Y53H1C.2	0.0803048	0.755621
ehn-3	WBGene00001223	protein_coding	ZK616.10	0.0777253	NA
ehs-1	WBGene00001224	protein_coding	ZK1248.3	-0.146051	0.595898
eif-3.B	WBGene00001225	protein_coding	Y54E2A.11	0.136981	0.576196
eif-3.C	WBGene00001226	protein_coding	T23D8.4	0.0559543	0.870136
eif-3.D	WBGene00001227	protein_coding	R08D7.3	0.00504715	0.988214
eif-3.E	WBGene00001228	protein_coding	B0511.10	-0.061876	0.796747
eif-3.F	WBGene00001229	protein_coding	D2013.7	-0.0265865	0.919922
eif-3.G	WBGene00001230	protein_coding	F22B5.2	0.124657	0.55543
eif-3.H	WBGene00001231	protein_coding	C41D11.2	-0.165894	0.49393
eif-3.I	WBGene00001232	protein_coding	Y74C10AR.1	-0.114763	0.650751
eif-3.K	WBGene00001233	protein_coding	T16G1.11	-0.0500788	0.876501
eif-6	WBGene00001234	protein_coding	C47B2.5	-0.208032	0.401049
elb-1	WBGene00001235	protein_coding	Y41C4A.10	-0.103874	0.759398
elc-1	WBGene00001236	protein_coding	Y82E9BR.15	-0.0848094	0.657409
elc-2	WBGene00001237	protein_coding	W03H1.2	-0.00446232	0.994747
elo-1	WBGene00001239	protein_coding	F56H11.4	0.039434	0.909305
elo-2	WBGene00001240	protein_coding	F11E6.5	0.234	0.267891
elo-3	WBGene00001241	protein_coding	D2024.3	0.0934846	0.692547
elo-4	WBGene00001242	protein_coding	C40H1.4	0.0553011	0.935582
elo-5	WBGene00001243	protein_coding	F41H10.7	1.10172	6.63746e-09
elo-6	WBGene00001244	protein_coding	F41H10.8	0.450629	0.0508644
elo-7	WBGene00001245	protein_coding	F56H11.3	-0.420542	0.407589
elo-8	WBGene00001246	protein_coding	Y47D3A.30	0.119429	NA
elo-9	WBGene00001247	protein_coding	Y53F4B.2	-0.113091	0.726204
elp-1	WBGene00001248	protein_coding	F38A6.2	0.122674	0.517002
elt-1	WBGene00001249	protein_coding	W09C2.1	0.0994241	0.631135
elt-2	WBGene00001250	protein_coding	C33D3.1	0.344485	0.172283
elt-3	WBGene00001251	protein_coding	K02B9.4	-0.181323	0.406035
elt-4	WBGene00001252	protein_coding	C39B10.6	0.696083	0.117768
elt-6	WBGene00001253	protein_coding	F52C12.5	-0.139292	0.662741
emb-4	WBGene00001258	protein_coding	Y80D3A.2	0.373484	0.11207
emb-5	WBGene00001259	protein_coding	T04A8.14	0.157565	0.388089
emb-8	WBGene00001262	protein_coding	K10D2.6	-0.230025	0.391669
emb-9	WBGene00001263	protein_coding	K04H4.1	-0.272746	0.25149
emb-27	WBGene00001281	protein_coding	F10B5.6	0.597611	0.0153026
emb-30	WBGene00001284	protein_coding	F54C8.3	0.0998001	0.616643
emo-1	WBGene00001303	protein_coding	F32D8.6	-0.0446391	0.872605
emr-1	WBGene00001309	protein_coding	M01D7.6	-0.0469175	0.887874
end-1	WBGene00001310	protein_coding	F58E10.2	0.489529	NA
end-3	WBGene00001311	protein_coding	F58E10.5	-0.157716	NA
ent-1	WBGene00001320	protein_coding	ZK809.4	0.389753	0.113825
eor-1	WBGene00001324	protein_coding	R11E3.6	0.214184	0.219816
eor-2	WBGene00001325	protein_coding	C44H4.7	-0.141138	0.404573
epi-1	WBGene00001328	protein_coding	K08C7.3	-0.00262821	0.992651
epn-1	WBGene00001329	protein_coding	T04C10.2	-0.044024	0.879308
eps-8	WBGene00001330	protein_coding	Y57G11C.24	0.0779564	0.733692
erd-2	WBGene00001331	protein_coding	F09B9.3	-0.198687	0.258783
eri-1	WBGene00001332	protein_coding	T07A9.5	0.0993178	0.745735
erm-1	WBGene00001333	protein_coding	C01G8.5	0.255783	0.115507
ero-1	WBGene00001334	protein_coding	Y105E8B.8	-0.232294	0.326971
erp-1	WBGene00001335	protein_coding	F35A5.8	-0.257458	0.32096
qars-1	WBGene00001336	protein_coding	Y41E3.4	0.196076	0.301978
ears-1	WBGene00001337	protein_coding	ZC434.5	0.0914291	0.674328
ears-2	WBGene00001338	protein_coding	T07A9.2	-0.11968	0.610442
etr-1	WBGene00001340	protein_coding	T01D1.2	0.0554958	0.800246
fos-1	WBGene00001345	protein_coding	F29G9.4	-0.316969	0.0446993
evl-14	WBGene00001352	protein_coding	H38K22.1	-0.166336	0.163572
evl-20	WBGene00001358	protein_coding	F22B5.1	-0.0416715	0.917468
exc-4	WBGene00001365	protein_coding	Y105E8A.22	0.376546	0.0987124
exc-5	WBGene00001366	protein_coding	C33D9.1	-0.188264	0.331657
exc-7	WBGene00001368	protein_coding	F35H8.5	-0.146028	0.625565
exl-1	WBGene00001371	protein_coding	F26H11.5	-0.0167794	0.966954
exo-3	WBGene00001372	protein_coding	R09B3.1	0.331993	0.530325
exp-1	WBGene00001373	protein_coding	H35N03.1	-0.417861	0.0784074
exp-2	WBGene00001374	protein_coding	F12F3.1	-0.374326	0.174113
eya-1	WBGene00001377	protein_coding	C49A1.4	-0.211608	0.670607
far-1	WBGene00001385	protein_coding	F02A9.2	-0.253226	0.151435
far-2	WBGene00001386	protein_coding	F02A9.3	-0.190965	0.745767
far-3	WBGene00001387	protein_coding	F15B9.1	1.20341	0.0038108
far-4	WBGene00001388	protein_coding	F15B9.2	-0.021324	NA
far-5	WBGene00001389	protein_coding	F15B9.3	0.023821	0.958867
far-6	WBGene00001390	protein_coding	W02A2.2	0.200571	0.732437
far-7	WBGene00001391	protein_coding	K01A2.2	0.143705	0.776568
far-8	WBGene00001392	protein_coding	K02F3.3	-0.660973	0.119385
fat-1	WBGene00001393	protein_coding	Y67H2A.8	0.0222249	0.949993
fat-2	WBGene00001394	protein_coding	W02A2.1	0.227397	0.436955
fat-3	WBGene00001395	protein_coding	W08D2.4	0.985169	0.000351226
fat-4	WBGene00001396	protein_coding	T13F2.1	0.771891	0.00118002
fat-5	WBGene00001397	protein_coding	W06D12.3	-0.820319	0.0252614
fat-6	WBGene00001398	protein_coding	VZK822L.1	0.323603	0.336621
fat-7	WBGene00001399	protein_coding	F10D2.9	-0.792968	0.0730695
fax-1	WBGene00001400	protein_coding	F56E3.4	-0.409991	0.292145
fbf-1	WBGene00001401	protein_coding	H12I13.4	1.07459	0.0103618
fbf-2	WBGene00001402	protein_coding	F21H12.5	0.870832	0.0246453
fbl-1	WBGene00001403	protein_coding	F56H11.1	-0.250063	0.326971
fbp-1	WBGene00001404	protein_coding	K07A3.1	-0.309594	0.161571
fce-1	WBGene00001405	protein_coding	C04F12.10	0.084951	0.629278
fce-2	WBGene00001406	protein_coding	F48F5.5	0.170232	0.558634
feh-1	WBGene00001410	protein_coding	Y54F10AM.2	-0.25247	0.541056
fem-1	WBGene00001411	protein_coding	F35D6.1	-0.00288153	0.990795
fem-2	WBGene00001412	protein_coding	T19C3.8	0.0495415	0.866338
fem-3	WBGene00001413	protein_coding	C01F6.4	0.968297	0.0160772
fer-1	WBGene00001414	protein_coding	F43G9.6	-0.225943	0.692544
fib-1	WBGene00001423	protein_coding	T01C3.7	-0.308089	0.347966
fis-1	WBGene00001424	protein_coding	F41G3.4	-0.0291271	NA
fis-2	WBGene00001425	protein_coding	F13B9.8	-0.0964185	0.714978
fkb-1	WBGene00001426	protein_coding	F36H1.1	0.0160942	0.940419
fkb-2	WBGene00001427	protein_coding	Y18D10A.19	0.310212	0.104391
fkb-3	WBGene00001428	protein_coding	C05C8.3	-0.0153431	0.972208
fkb-4	WBGene00001429	protein_coding	ZC455.10	0.552624	0.0648737
fkb-5	WBGene00001430	protein_coding	C50F2.6	0.197027	0.702932
fkb-6	WBGene00001431	protein_coding	F31D4.3	-0.581045	0.0639765
fkb-7	WBGene00001432	protein_coding	B0511.1	0.0748381	0.912
fkb-8	WBGene00001433	protein_coding	Y18D10A.25	0.376697	0.0568491
fkh-2	WBGene00001434	protein_coding	T14G12.4	0.0931373	0.887066
fkh-3	WBGene00001435	protein_coding	C29F7.4	0.0640336	NA
fkh-4	WBGene00001436	protein_coding	C29F7.5	-0.0356648	NA
fkh-5	WBGene00001437	protein_coding	F26A1.2	-0.100468	NA
fkh-6	WBGene00001438	protein_coding	B0286.5	-0.397089	0.337213
fkh-7	WBGene00001439	protein_coding	F26D12.1	-0.147762	0.622606
fkh-8	WBGene00001440	protein_coding	F40H3.4	-0.375053	0.228228
fkh-9	WBGene00001441	protein_coding	K03C7.2	0.0201535	0.936895
fkh-10	WBGene00001442	protein_coding	C25A1.2	-0.35326	0.347785
fli-1	WBGene00001443	protein_coding	B0523.5	0.030768	0.916433
flp-1	WBGene00001444	protein_coding	F23B2.5	-0.214421	0.619002
flp-2	WBGene00001445	protein_coding	W07E11.3	-0.322687	0.410925
flp-3	WBGene00001446	protein_coding	W07E11.2	-0.203297	0.623873
flp-4	WBGene00001447	protein_coding	C18D1.3	-0.405786	0.157351
flp-5	WBGene00001448	protein_coding	C03G5.7	-0.244949	0.368632
flp-6	WBGene00001449	protein_coding	F07D3.2	-0.246056	0.50809
flp-7	WBGene00001450	protein_coding	F49E10.3	-0.337618	0.246331
flp-8	WBGene00001451	protein_coding	F31F6.4	-0.501018	0.134156
flp-9	WBGene00001452	protein_coding	C36H8.3	-0.105131	0.77442
flp-10	WBGene00001453	protein_coding	T06C10.4	-0.0770291	0.825543
flp-11	WBGene00001454	protein_coding	K02G10.4	-0.116134	0.781496
flp-12	WBGene00001455	protein_coding	C05E11.8	-0.36822	0.276641
flp-13	WBGene00001456	protein_coding	F33D4.3	-0.279864	0.518657
flp-14	WBGene00001457	protein_coding	Y37D8A.15	-0.27805	0.423043
flp-15	WBGene00001458	protein_coding	ZK525.1	-0.284168	0.243897
flp-16	WBGene00001459	protein_coding	F15D4.8	-0.333211	0.163179
flp-17	WBGene00001460	protein_coding	C52D10.11	-0.28586	0.481654
flp-18	WBGene00001461	protein_coding	Y48D7A.2	-0.313759	0.424438
flp-19	WBGene00001462	protein_coding	M79.4	-0.548408	0.0731035
flp-20	WBGene00001463	protein_coding	E01H11.3	-0.409777	0.192342
flp-21	WBGene00001464	protein_coding	C26F1.10	-0.203969	0.578027
flr-1	WBGene00001465	protein_coding	F02D10.5	0.349852	0.2196
flr-2	WBGene00001466	protein_coding	F58H1.4	-0.429444	0.238907
flr-4	WBGene00001468	protein_coding	F09B12.6	0.52096	0.135526
flt-1	WBGene00001470	protein_coding	ZK783.4	-0.131814	0.615509
fmi-1	WBGene00001475	protein_coding	F15B9.7	-0.526794	0.0171867
fmo-1	WBGene00001476	protein_coding	K08C7.2	0.440856	0.0432908
fmo-2	WBGene00001477	protein_coding	K08C7.5	1.4868	0.000173842
fmo-3	WBGene00001478	protein_coding	Y39A1A.19	-0.309263	0.439132
fmo-4	WBGene00001479	protein_coding	F53F4.5	-0.262538	0.368581
fmo-5	WBGene00001480	protein_coding	H24K24.5	-0.229816	0.395786
fog-1	WBGene00001481	protein_coding	Y54E10A.4	1.38381	3.19049e-06
fog-2	WBGene00001482	protein_coding	Y113G7B.5	0.892509	0.040173
fog-3	WBGene00001483	protein_coding	C03C11.2	1.43029	0.000335695
fox-1	WBGene00001484	protein_coding	T07D1.4	-0.146724	0.666632
fre-1	WBGene00001485	protein_coding	Y113G7A.8	0.177289	0.403946
frh-1	WBGene00001486	protein_coding	F59G1.7	-0.214668	0.535387
frk-1	WBGene00001487	protein_coding	T04B2.2	0.461319	0.354021
frm-1	WBGene00001488	protein_coding	ZK270.2	-0.0867945	0.788094
frm-2	WBGene00001489	protein_coding	T04C9.6	-0.340054	0.106691
frm-3	WBGene00001490	protein_coding	H05G16.1	-0.0625673	0.830054
frm-4	WBGene00001491	protein_coding	C24A11.8	-0.0967383	0.63183
frm-5.1	WBGene00001492	protein_coding	Y38C1AB.8	0.174282	0.406353
frm-7	WBGene00001493	protein_coding	C51F7.1	-0.16837	0.277564
frm-8	WBGene00001494	protein_coding	H09G03.2	-0.258237	0.417714
frm-9	WBGene00001495	protein_coding	F31B12.3	-0.497724	0.14786
frm-10	WBGene00001496	protein_coding	F25H9.5	-0.365324	0.0326837
fars-1	WBGene00001497	protein_coding	T08B2.9	-0.122028	0.676994
fars-3	WBGene00001498	protein_coding	F22B5.9	-0.071663	0.745838
fsn-1	WBGene00001499	protein_coding	C26E6.5	0.151639	0.659783
ftn-1	WBGene00001500	protein_coding	C54F6.14	-0.0868347	0.846053
ftn-2	WBGene00001501	protein_coding	D1037.3	-0.194321	0.280408
ftt-2	WBGene00001502	protein_coding	F52D10.3	-0.208209	0.403946
fum-1	WBGene00001503	protein_coding	H14A12.2	0.124295	0.715695
fut-1	WBGene00001505	protein_coding	K08F8.3	0.266993	0.138594
fut-2	WBGene00001506	protein_coding	EGAP9.2	0.396299	0.216203
fut-4	WBGene00001507	protein_coding	K12H6.3	-0.380531	0.437343
fut-8	WBGene00001508	protein_coding	C10F3.6	-0.242172	0.23157
fzo-1	WBGene00001509	protein_coding	ZK1248.14	-0.122193	0.488289
fzr-1	WBGene00001510	protein_coding	ZK1307.6	-0.264563	0.238795
fzy-1	WBGene00001511	protein_coding	ZK177.6	0.528249	0.270129
gab-1	WBGene00001512	protein_coding	ZC482.1	-0.41237	0.00940136
gad-1	WBGene00001513	protein_coding	T05H4.14	0.018905	0.965634
xnd-1	WBGene00001514	protein_coding	C05D2.5	0.704634	0.122491
gap-1	WBGene00001515	protein_coding	T24C12.2	-0.0974974	0.63733
gap-2	WBGene00001516	protein_coding	ZK899.8	0.0434274	0.88127
gar-1	WBGene00001517	protein_coding	C15B12.5	-0.245065	0.522827
gar-2	WBGene00001518	protein_coding	F47D12.1	-0.41385	0.162485
gar-3	WBGene00001519	protein_coding	Y40H4A.1	-0.242038	0.254449
gas-1	WBGene00001520	protein_coding	K09A9.5	0.118446	0.514125
gbh-1	WBGene00001522	protein_coding	D2089.5	-0.634927	0.0391858
gbh-2	WBGene00001523	protein_coding	M05D6.7	-0.287637	0.170298
gck-1	WBGene00001526	protein_coding	T19A5.2	0.158833	0.420077
gcs-1	WBGene00001527	protein_coding	F37B12.2	-0.206792	0.260189
gcy-1	WBGene00001528	protein_coding	AH6.1	-0.258021	NA
gcy-2	WBGene00001529	protein_coding	R134.2	-0.0198057	NA
gcy-3	WBGene00001530	protein_coding	R134.1	-0.076979	0.911783
gcy-4	WBGene00001531	protein_coding	ZK970.5	0.0567428	0.929654
gcy-5	WBGene00001532	protein_coding	ZK970.6	-0.439219	0.280408
gcy-6	WBGene00001533	protein_coding	B0024.6	-0.10968	0.855325
gcy-7	WBGene00001534	protein_coding	F52E1.4	-0.623327	0.117272
gcy-8	WBGene00001535	protein_coding	C49H3.1	0.0692655	0.901112
gcy-9	WBGene00001536	protein_coding	ZK455.2	-0.461442	0.207834
gcy-11	WBGene00001537	protein_coding	C30G4.3	-0.490015	0.0620134
gcy-12	WBGene00001538	protein_coding	F08B1.2	-0.328445	0.148676
gcy-13	WBGene00001539	protein_coding	F23H12.6	-0.955062	7.31584e-07
gcy-14	WBGene00001540	protein_coding	ZC412.2	-0.285232	0.603111
gcy-15	WBGene00001541	protein_coding	ZC239.7	-0.108545	0.864488
gcy-17	WBGene00001542	protein_coding	W03F11.2	-0.583104	0.203827
gcy-18	WBGene00001543	protein_coding	ZK896.8	-0.732007	0.0768756
gcy-19	WBGene00001544	protein_coding	C17F4.6	-0.178075	0.77006
gcy-20	WBGene00001545	protein_coding	F21H7.9	-0.429995	0.374804
gcy-21	WBGene00001546	protein_coding	F22E5.3	-0.223175	0.697848
gcy-22	WBGene00001547	protein_coding	T03D8.5	-0.510183	0.181828
gcy-23	WBGene00001548	protein_coding	T26C12.4	-0.242833	0.642531
gcy-25	WBGene00001549	protein_coding	Y105C5B.2	-0.254052	0.63252
gcy-27	WBGene00001550	protein_coding	C06A12.4	-0.402175	0.311786
gcy-31	WBGene00001551	protein_coding	T07D1.1	-0.238942	0.56234
gcy-32	WBGene00001552	protein_coding	C06B3.8	-0.220332	0.616244
gcy-33	WBGene00001553	protein_coding	F57F5.2	-0.418928	0.323336
gcy-34	WBGene00001554	protein_coding	M04G12.3	0.0589804	0.899125
gcy-35	WBGene00001555	protein_coding	T04D3.4	-0.282224	0.136643
gcy-36	WBGene00001556	protein_coding	C46E1.2	-0.240478	0.48544
gcy-37	WBGene00001557	protein_coding	C54E4.3	-0.450524	0.309017
gdi-1	WBGene00001558	protein_coding	Y57G11C.10	-0.248514	0.139926
gei-1	WBGene00001559	protein_coding	F45H7.2	0.395354	0.0140128
gei-3	WBGene00001560	protein_coding	T22H6.6	-0.0435776	0.898621
gei-4	WBGene00001561	protein_coding	W07B3.2	-0.667313	0.0165779
lin-66	WBGene00001562	protein_coding	B0513.1	0.082638	0.817397
gei-6	WBGene00001563	protein_coding	C05C8.4	0.158556	0.510361
icl-1	WBGene00001564	protein_coding	C05E4.9	-0.130354	0.758338
gei-8	WBGene00001565	protein_coding	C14B9.6	-0.160986	0.524449
acdh-13	WBGene00001566	protein_coding	C28C12.9	0.0674173	0.823409
snpc-4	WBGene00001568	protein_coding	F32H2.1	0.436124	0.0158872
gei-12	WBGene00001569	protein_coding	F52D2.4	0.489819	0.272621
gei-13	WBGene00001570	protein_coding	F58A4.11	0.0240581	0.934227
gei-14	WBGene00001571	protein_coding	K01C8.5	0.83934	0.0137266
gei-15	WBGene00001572	protein_coding	M03A8.4	-0.303488	0.260013
gei-17	WBGene00001574	protein_coding	W10D5.3	-0.0709027	0.695504
gei-18	WBGene00001575	protein_coding	Y37A1B.15	-0.556837	0.241541
gem-4	WBGene00001577	protein_coding	T12A7.1	-0.0230266	0.95342
ges-1	WBGene00001578	protein_coding	R12A1.4	0.946998	0.00120281
gex-2	WBGene00001579	protein_coding	F56A11.1	0.104567	0.58071
gex-3	WBGene00001580	protein_coding	F28D1.10	-0.00435761	0.986713
gfi-1	WBGene00001581	protein_coding	F57F4.3	0.821399	0.00345576
gfi-2	WBGene00001582	protein_coding	K02A11.1	-0.130793	0.313101
gfi-3	WBGene00001583	protein_coding	M163.4	0.0821008	0.789183
nrde-4	WBGene00001584	protein_coding	F45E4.10	0.296938	0.136643
gfl-1	WBGene00001585	protein_coding	M04B2.3	0.155371	0.622769
ggr-1	WBGene00001586	protein_coding	C09G5.1	-0.147901	0.63999
ggr-2	WBGene00001587	protein_coding	C45B2.4	-0.22159	0.550749
ggr-3	WBGene00001588	protein_coding	F09C12.1	-0.266926	0.460272
gip-1	WBGene00001589	protein_coding	H04J21.3	0.242147	0.132986
C45G3.3	WBGene00001590	protein_coding	C45G3.3	-0.113848	0.805365
glc-1	WBGene00001591	protein_coding	F11A5.10	0.544237	0.229897
glc-2	WBGene00001592	protein_coding	F25F8.2	-0.357447	0.110003
glc-3	WBGene00001593	protein_coding	ZC317.3	-0.288115	0.397881
glc-4	WBGene00001594	protein_coding	C27H5.8	-0.373456	0.208604
gld-1	WBGene00001595	protein_coding	T23G11.3	0.459616	0.319078
gld-2	WBGene00001596	protein_coding	ZC308.1	0.264257	0.0671764
gld-3	WBGene00001597	protein_coding	T07F8.3	0.779783	0.0810705
glh-1	WBGene00001598	protein_coding	T21G5.3	0.889056	0.0409898
glh-2	WBGene00001599	protein_coding	C55B7.1	0.628949	0.153015
glh-3	WBGene00001600	protein_coding	B0414.6	1.27573	0.0014433
glh-4	WBGene00001601	protein_coding	T12F5.3	0.872322	0.0456715
gln-1	WBGene00001602	protein_coding	C45B2.5	-0.461644	0.0728081
gln-2	WBGene00001603	protein_coding	K03H1.1	0	NA
gln-3	WBGene00001604	protein_coding	Y105C5B.28	0.398069	0.148456
gln-5	WBGene00001606	protein_coding	F26D10.10	0.545214	0.238516
gln-6	WBGene00001607	protein_coding	C28D4.3	0.698568	0.115574
R07B1.8	WBGene00001608	protein_coding	R07B1.8	0.0354398	0.957694
glp-1	WBGene00001609	protein_coding	F02A9.6	0.891311	0.0393241
glr-1	WBGene00001612	protein_coding	C06E1.4	-0.50441	0.0493639
glr-2	WBGene00001613	protein_coding	B0280.12	-0.291007	0.414993
glr-3	WBGene00001614	protein_coding	K10D3.1	-0.230144	0.60418
glr-4	WBGene00001615	protein_coding	C06A8.9	-0.102826	0.761002
glr-5	WBGene00001616	protein_coding	ZC196.7	-0.506247	0.0940706
glr-6	WBGene00001617	protein_coding	F41B4.4	-0.0200933	0.948301
glr-7	WBGene00001618	protein_coding	C43H6.9	0.325361	0.539531
glr-8	WBGene00001619	protein_coding	F22A3.3	-0.082712	0.888566
glt-1	WBGene00001620	protein_coding	C12D12.2	-0.2086	0.527966
glt-3	WBGene00001621	protein_coding	K08F4.4	-0.316952	0.421385
glt-4	WBGene00001622	protein_coding	T22E5.2	-0.407193	0.170883
glt-5	WBGene00001623	protein_coding	Y53C12A.2	-0.323521	0.248257
glt-6	WBGene00001624	protein_coding	R05G6.6	-0.379771	0.374075
glt-7	WBGene00001625	protein_coding	W03G1.1	-0.0277789	0.964392
gly-1	WBGene00001626	protein_coding	F44F4.6	-0.244515	0.6505
gly-2	WBGene00001627	protein_coding	C55B7.2	-0.259755	0.389135
gly-3	WBGene00001628	protein_coding	ZK688.8	-0.0812868	0.686186
gly-4	WBGene00001629	protein_coding	Y116F11B.12	0.0267289	0.91631
gly-5	WBGene00001630	protein_coding	Y39E4B.12	-0.0547402	0.77978
gly-6	WBGene00001631	protein_coding	H38K22.5	-0.101203	0.696051
gly-7	WBGene00001632	protein_coding	Y46H3A.6	-0.035332	0.911216
gly-8	WBGene00001633	protein_coding	Y66A7A.6	0.628012	0.0725748
gly-10	WBGene00001635	protein_coding	Y45F10D.3	0.238379	0.278058
gly-11	WBGene00001636	protein_coding	Y75B8A.9	0.200968	0.5578
gly-12	WBGene00001637	protein_coding	F48E3.1	-0.217393	0.383518
gly-13	WBGene00001638	protein_coding	B0416.6	-0.0114779	0.973452
gly-14	WBGene00001639	protein_coding	M01F1.1	1.11034	0.00821317
gly-15	WBGene00001640	protein_coding	C54C8.11	-0.430039	NA
gly-16	WBGene00001641	protein_coding	T15D6.2	NA	NA
gly-17	WBGene00001642	protein_coding	T15D6.3	NA	NA
gly-18	WBGene00001643	protein_coding	F22D6.11	-0.140212	0.662308
gly-19	WBGene00001644	protein_coding	F22D6.12	0.229461	0.2586
gly-20	WBGene00001645	protein_coding	C03E10.4	0.0412501	0.896618
gna-1	WBGene00001646	protein_coding	B0024.12	-0.257199	0.509727
gna-2	WBGene00001647	protein_coding	T23G11.2	0.441867	0.377326
goa-1	WBGene00001648	protein_coding	C26C6.2	-0.311804	0.0897986
gob-1	WBGene00001649	protein_coding	H13N06.3	-0.222238	0.243278
gon-1	WBGene00001650	protein_coding	F25H8.3	0.257404	0.210926
gon-2	WBGene00001651	protein_coding	T01H8.5	0.285039	0.0215436
gon-4	WBGene00001653	protein_coding	K04D7.5	0.367352	0.184557
gop-1	WBGene00001660	protein_coding	C34E10.3	0.162006	0.292736
gop-2	WBGene00001661	protein_coding	C34E10.2	-0.0297005	0.934475
gop-3	WBGene00001662	protein_coding	C34E10.1	-0.0357001	0.875315
gpa-1	WBGene00001663	protein_coding	T19C4.6	-0.147212	0.644033
gpa-2	WBGene00001664	protein_coding	F38E1.5	-0.475578	0.0342028
gpa-3	WBGene00001665	protein_coding	E02C12.5	-0.73018	0.000773927
gpa-4	WBGene00001666	protein_coding	T07A9.7	-0.334181	0.290617
gpa-5	WBGene00001667	protein_coding	F53B1.7	-0.280463	0.607079
gpa-6	WBGene00001668	protein_coding	F48C11.1	-0.411598	0.330361
gpa-7	WBGene00001669	protein_coding	R10H10.5	-0.449111	0.0269847
gpa-8	WBGene00001670	protein_coding	F56H9.3	-0.108045	0.85016
gpa-9	WBGene00001671	protein_coding	F56H9.4	0.790841	0.00849143
gpa-10	WBGene00001672	protein_coding	C55H1.2	-0.54266	0.112402
gpa-11	WBGene00001673	protein_coding	C16A11.1	-0.541502	0.0237723
gpa-12	WBGene00001674	protein_coding	F18G5.3	-0.0193516	0.957377
gpa-13	WBGene00001675	protein_coding	F18E2.5	-0.374165	0.30761
gpa-14	WBGene00001676	protein_coding	B0207.3	-0.50776	0.0430248
gpa-15	WBGene00001677	protein_coding	M04C7.1	0.100135	0.813562
gpa-16	WBGene00001678	protein_coding	Y95B8A.5	0.25238	0.286214
gpb-1	WBGene00001679	protein_coding	F13D12.7	-0.241297	0.323336
gpb-2	WBGene00001680	protein_coding	F52A8.2	-0.235386	0.289882
gpc-1	WBGene00001681	protein_coding	K02A4.2	-0.692149	0.00441273
gpc-2	WBGene00001682	protein_coding	F08B6.2	-0.372756	0.0152465
gpd-1	WBGene00001683	protein_coding	T09F3.3	0.434727	0.381789
gpd-2	WBGene00001684	protein_coding	K10B3.8	-0.00440805	0.991831
gpd-3	WBGene00001685	protein_coding	K10B3.7	0.0948204	0.800679
gpd-4	WBGene00001686	protein_coding	F33H1.2	0.490083	0.306908
gpn-1	WBGene00001687	protein_coding	F59D12.4	-0.587051	0.168736
gpr-1	WBGene00001688	protein_coding	F22B7.13	0.45949	0.351004
gpr-2	WBGene00001689	protein_coding	C38C10.4	0.750994	0.0817811
grd-1	WBGene00001690	protein_coding	R08B4.1	-0.173168	0.768842
grd-2	WBGene00001691	protein_coding	F46B3.5	0	NA
grd-3	WBGene00001692	protein_coding	W05E7.1	0.132158	0.609335
grd-4	WBGene00001693	protein_coding	T01B10.1	0.179762	NA
grd-5	WBGene00001694	protein_coding	F41E6.2	0.719129	0.00022192
grd-6	WBGene00001695	protein_coding	T18H9.1	-0.172102	NA
grd-7	WBGene00001696	protein_coding	F46H5.6	-0.711521	NA
grd-8	WBGene00001697	protein_coding	C37C3.4	-0.0376115	NA
grd-9	WBGene00001698	protein_coding	C04E6.6	-0.321559	0.541015
grd-10	WBGene00001699	protein_coding	F09D12.1	-0.13233	0.596697
grd-11	WBGene00001700	protein_coding	K02E2.2	-0.293086	NA
grd-12	WBGene00001701	protein_coding	F02D8.2	0.264737	0.631089
grd-13	WBGene00001702	protein_coding	W05E7.3	0.0346774	0.89772
grd-14	WBGene00001703	protein_coding	T01B10.2	0.166857	0.769667
grd-15	WBGene00001704	protein_coding	Y87G2A.15	0.0963726	0.887389
grd-16	WBGene00001705	protein_coding	Y69A2AL.1	-0.262685	0.625219
grh-1	WBGene00001707	protein_coding	Y48G8AR.1	0.115905	0.669639
grk-1	WBGene00001708	protein_coding	F19C6.1	-0.0427896	0.852574
grk-2	WBGene00001709	protein_coding	W02B3.2	-0.471671	0.041018
grl-1	WBGene00001710	protein_coding	C24G6.7	0.143579	0.819341
grl-2	WBGene00001711	protein_coding	T16G1.8	-0.153101	NA
grl-3	WBGene00001712	protein_coding	K03B8.7	0.06749	NA
grl-4	WBGene00001713	protein_coding	F42C5.7	0.587023	0.0551137
grl-5	WBGene00001714	protein_coding	Y47D7A.5	0.208661	NA
grl-6	WBGene00001715	protein_coding	K10C2.5	-0.088028	0.898285
grl-7	WBGene00001716	protein_coding	T02E9.2	-0.294725	NA
grl-8	WBGene00001717	protein_coding	ZC487.5	-0.185627	0.708737
grl-9	WBGene00001718	protein_coding	ZC487.4	-0.585867	0.209027
grl-10	WBGene00001719	protein_coding	C26F1.5	0.161274	0.725973
grl-11	WBGene00001720	protein_coding	ZK512.9	-0.04391	NA
grl-12	WBGene00001721	protein_coding	F28A12.2	-0.445298	0.368632
grl-13	WBGene00001722	protein_coding	F32D1.4	0.0115488	NA
grl-14	WBGene00001723	protein_coding	T03D8.4	-0.0871824	0.806074
grl-15	WBGene00001724	protein_coding	Y75B8A.20	0.131425	0.839325
grl-16	WBGene00001725	protein_coding	Y65B4BR.6	-0.416217	0.412315
grl-17	WBGene00001726	protein_coding	C56A3.1	0.154865	NA
grl-18	WBGene00001727	protein_coding	T05C3.4	0.0488512	NA
grl-19	WBGene00001728	protein_coding	R02D3.6	-0.111211	NA
grl-20	WBGene00001729	protein_coding	C23H5.9	-0.390553	0.413002
grl-21	WBGene00001730	protein_coding	ZC168.5	0.0600146	0.925363
grl-22	WBGene00001731	protein_coding	W03A5.3	-0.0254929	NA
grl-23	WBGene00001732	protein_coding	E02A10.2	0.0308452	NA
grl-24	WBGene00001733	protein_coding	F11E6.2	-0.0397723	0.955999
grl-25	WBGene00001734	protein_coding	ZK643.8	0.127736	NA
grl-26	WBGene00001735	protein_coding	K02D7.6	-0.0634385	NA
grl-27	WBGene00001736	protein_coding	F40C5.3	0.308853	NA
grl-28	WBGene00001737	protein_coding	T24A6.15	-0.164983	NA
grl-29	WBGene00001738	protein_coding	T24A6.18	-0.0542884	NA
grl-30	WBGene00001739	protein_coding	T24A6.3	-0.0129171	NA
gro-1	WBGene00001740	protein_coding	ZC395.6	0.300905	0.3378
grp-1	WBGene00001743	protein_coding	K06H7.4	0.0182223	0.960186
gars-1	WBGene00001744	protein_coding	T10F2.1	-0.0173752	0.941908
gsa-1	WBGene00001745	protein_coding	R06A10.2	-0.191934	0.355376
gsk-3	WBGene00001746	protein_coding	Y18D10A.5	-0.14749	0.28407
gsp-1	WBGene00001747	protein_coding	F29F11.6	-0.14244	0.560729
gsp-2	WBGene00001748	protein_coding	F56C9.1	-0.0694089	0.661776
gst-1	WBGene00001749	protein_coding	R107.7	-0.956819	2.95373e-06
gst-2	WBGene00001750	protein_coding	K08F4.6	-0.392863	0.260687
gst-3	WBGene00001751	protein_coding	K08F4.11	-0.219289	0.423627
gst-4	WBGene00001752	protein_coding	K08F4.7	0.0382746	0.931447
gst-5	WBGene00001753	protein_coding	R03D7.6	-0.788053	0.00272145
gst-6	WBGene00001754	protein_coding	F11G11.3	-0.032821	0.935547
gst-7	WBGene00001755	protein_coding	F11G11.2	-0.82381	0.00197297
gst-8	WBGene00001756	protein_coding	F11G11.1	-0.985741	NA
gst-9	WBGene00001757	protein_coding	R05F9.5	0.157868	0.776983
gst-10	WBGene00001758	protein_coding	Y45G12C.2	-0.947451	0.00578837
gst-11	WBGene00001759	protein_coding	R11G1.3	-0.516951	0.149465
gst-12	WBGene00001760	protein_coding	F37B1.2	-1.09259	0.00692501
gst-13	WBGene00001761	protein_coding	T26C5.1	-0.605956	0.0179167
gst-14	WBGene00001762	protein_coding	F37B1.3	-0.268558	0.603854
gst-15	WBGene00001763	protein_coding	F37B1.4	-0.00538614	0.993825
gst-16	WBGene00001764	protein_coding	F37B1.5	-0.234924	0.643228
gst-17	WBGene00001765	protein_coding	F37B1.6	0	NA
gst-18	WBGene00001766	protein_coding	F37B1.7	-0.00647682	NA
gst-19	WBGene00001767	protein_coding	F37B1.8	-0.346722	0.391221
gst-20	WBGene00001768	protein_coding	Y48E1B.10	-0.229035	0.594736
gst-21	WBGene00001769	protein_coding	ZK697.6	-0.0108693	0.986713
gst-22	WBGene00001770	protein_coding	F21H7.1	0.494086	0.119826
gst-23	WBGene00001771	protein_coding	T28A11.11	-0.295565	0.481865
gst-24	WBGene00001772	protein_coding	F37B1.1	-0.263478	0.543686
gst-25	WBGene00001773	protein_coding	F37F2.3	-0.308569	0.537744
gst-26	WBGene00001774	protein_coding	Y53F4B.29	-0.308487	0.365484
gst-27	WBGene00001775	protein_coding	Y53F4B.30	-0.0192361	0.957295
gst-28	WBGene00001776	protein_coding	Y53F4B.31	0.261507	0.394021
gst-29	WBGene00001777	protein_coding	Y53F4B.32	0.679611	0.110612
gst-30	WBGene00001778	protein_coding	ZK546.11	-0.644469	0.145452
gst-31	WBGene00001779	protein_coding	Y53F4B.35	-0.545858	0.219804
gst-32	WBGene00001780	protein_coding	Y53F4B.37	-0.0601939	NA
gst-33	WBGene00001781	protein_coding	C02A12.1	-0.38733	0.382299
gst-34	WBGene00001782	protein_coding	Y1H11.1	0.365118	0.480547
gst-35	WBGene00001783	protein_coding	Y1H11.2	-0.46779	0.2586
gst-36	WBGene00001784	protein_coding	R07B1.4	0.158091	0.587206
gst-37	WBGene00001785	protein_coding	Y32G9A.1	0.0746717	NA
gst-38	WBGene00001786	protein_coding	F35E8.8	-0.934682	0.00301189
gst-39	WBGene00001787	protein_coding	Y53F4B.33	0.139033	0.674947
gst-40	WBGene00001788	protein_coding	F56B3.10	-0.67986	0.0082336
gst-41	WBGene00001789	protein_coding	R13D7.7	-0.128936	0.81458
gst-42	WBGene00001790	protein_coding	D1053.1	-0.0293039	0.944902
gst-43	WBGene00001791	protein_coding	Y71F9AL.5	0.124056	0.700879
gst-44	WBGene00001792	protein_coding	F13A7.10	0.244735	NA
gsy-1	WBGene00001793	protein_coding	Y46G5A.31	0.157311	0.564024
gta-1	WBGene00001794	protein_coding	K04D7.3	0.0505797	0.786407
gtl-1	WBGene00001795	protein_coding	C05C12.3	0.241386	0.306975
gtl-2	WBGene00001796	protein_coding	F54D1.5	0.251442	0.454106
lite-1	WBGene00001803	protein_coding	C14F11.3	-0.346565	0.240498
gur-3	WBGene00001804	protein_coding	ZC504.5	-0.247355	0.601214
gur-4	WBGene00001805	protein_coding	K09E4.5	0.149057	0.622606
gur-5	WBGene00001806	protein_coding	ZK622.2	-0.375525	0.448281
gut-2	WBGene00001808	protein_coding	T10G3.6	0.247316	0.316282
haf-1	WBGene00001811	protein_coding	C30H6.6	0.419024	0.138234
haf-2	WBGene00001812	protein_coding	F43E2.4	0.395855	0.115152
haf-3	WBGene00001813	protein_coding	F57A10.3	0.0398005	0.878342
haf-4	WBGene00001814	protein_coding	W04C9.1	0.398864	0.149138
hmt-1	WBGene00001815	protein_coding	W09D6.6	-0.0544691	0.892117
haf-6	WBGene00001816	protein_coding	Y48G8AL.11	-0.0438067	0.887389
haf-7	WBGene00001817	protein_coding	Y50E8A.16	-0.00922907	0.97995
haf-8	WBGene00001818	protein_coding	Y57G11C.1	0.0269282	NA
haf-9	WBGene00001819	protein_coding	ZK484.2	0.5722	0.01542
ham-1	WBGene00001820	protein_coding	F53B2.6	-0.216326	0.501359
ham-2	WBGene00001821	protein_coding	C07A12.1	-0.082045	0.83735
hap-1	WBGene00001823	protein_coding	ZC395.7	0.0685759	0.838007
hbl-1	WBGene00001824	protein_coding	F13D11.2	0.284049	0.29868
hcf-1	WBGene00001827	protein_coding	C46A5.9	0.251615	0.289231
hch-1	WBGene00001828	protein_coding	F40E10.1	-0.00681298	NA
hcp-1	WBGene00001829	protein_coding	ZK1055.1	0.558166	0.231054
hcp-2	WBGene00001830	protein_coding	T06E4.1	0.998243	0.0123376
hcp-3	WBGene00001831	protein_coding	F58A4.3	0.351787	0.471149
hcp-4	WBGene00001832	protein_coding	T03F1.9	0.648561	0.0817315
hcp-6	WBGene00001833	protein_coding	Y110A7A.1	0.704903	0.0928442
hda-1	WBGene00001834	protein_coding	C53A5.3	0.0080103	0.98365
hda-2	WBGene00001835	protein_coding	C08B11.2	0.301206	0.12535
hda-3	WBGene00001836	protein_coding	R06C1.1	-0.0854505	0.718285
hda-4	WBGene00001837	protein_coding	C10E2.3	-0.201516	0.302987
hda-10	WBGene00001838	protein_coding	Y51H1A.5	0.257311	0.285609
hdl-1	WBGene00001839	protein_coding	ZK829.2	-0.0023545	NA
hel-1	WBGene00001840	protein_coding	C26D10.2	0.187457	0.485213
hen-1	WBGene00001841	protein_coding	C36B7.7	-0.0950604	0.888088
her-1	WBGene00001842	protein_coding	ZK287.8	1.14527	0.00406099
hgo-1	WBGene00001843	protein_coding	W06D4.1	-0.117259	0.745229
hid-1	WBGene00001844	protein_coding	K02E10.2	-0.0418333	0.856724
hif-1	WBGene00001851	protein_coding	F38A6.3	-0.45458	0.0180403
hil-1	WBGene00001852	protein_coding	C30G7.1	0.642134	0.0606095
hil-2	WBGene00001853	protein_coding	Y73B6BL.9	1.86574	1.16609e-13
hil-3	WBGene00001854	protein_coding	F22F1.1	2.01059	1.47753e-19
hil-4	WBGene00001855	protein_coding	C18G1.5	0.797444	0.0684207
hil-5	WBGene00001856	protein_coding	B0414.3	1.62345	6.63306e-06
hil-6	WBGene00001857	protein_coding	F59A7.4	2.05653	1.72349e-08
hil-7	WBGene00001858	protein_coding	C01B10.5	0.216543	0.501929
hil-8	WBGene00001859	protein_coding	T05E8.2	0.741579	0.0986276
him-1	WBGene00001860	protein_coding	F28B3.7	0.0533667	0.832466
him-3	WBGene00001862	protein_coding	ZK381.1	0.243223	0.617512
him-4	WBGene00001863	protein_coding	F15G9.4	0.49433	0.13957
him-5	WBGene00001864	protein_coding	D1086.4	0.641276	0.0107505
him-6	WBGene00001865	protein_coding	T04A11.6	0.766701	0.0191122
him-8	WBGene00001867	protein_coding	T07G12.12	0.479442	0.204378
him-10	WBGene00001869	protein_coding	R12B2.4	0.452164	0.270372
him-14	WBGene00001872	protein_coding	ZK1127.11	1.06644	0.0113082
him-17	WBGene00001874	protein_coding	T09E8.2	0.112402	0.625385
his-1	WBGene00001875	protein_coding	T10C6.14	0.420998	0.255018
his-2	WBGene00001876	protein_coding	T10C6.13	0.311736	0.448819
his-3	WBGene00001877	protein_coding	T10C6.12	0.293373	0.501762
his-4	WBGene00001878	protein_coding	T10C6.11	0.407626	0.322542
his-5	WBGene00001879	protein_coding	F45F2.3	0.480074	0.190638
his-6	WBGene00001880	protein_coding	F45F2.13	0.519877	0.124672
his-7	WBGene00001881	protein_coding	F45F2.4	0.308192	0.412436
his-8	WBGene00001882	protein_coding	F45F2.12	0.445508	0.206267
his-9	WBGene00001883	protein_coding	ZK131.3	0.890155	0.0108391
his-10	WBGene00001884	protein_coding	ZK131.4	0.801099	0.0247097
his-11	WBGene00001885	protein_coding	ZK131.5	0.416525	0.259019
his-12	WBGene00001886	protein_coding	ZK131.6	0.285163	0.537744
his-13	WBGene00001887	protein_coding	ZK131.7	0.919265	0.00807918
his-14	WBGene00001888	protein_coding	ZK131.8	0.782473	0.0217244
his-15	WBGene00001889	protein_coding	ZK131.9	0.35827	0.324031
his-16	WBGene00001890	protein_coding	ZK131.10	0.408915	0.326549
his-17	WBGene00001891	protein_coding	K06C4.5	0.416502	0.223405
his-18	WBGene00001892	protein_coding	K06C4.10	0.429615	0.259019
his-19	WBGene00001893	protein_coding	K06C4.11	0.359296	0.331657
his-20	WBGene00001894	protein_coding	K06C4.4	0.493022	0.125137
his-21	WBGene00001895	protein_coding	K06C4.3	0.354285	0.34496
his-22	WBGene00001896	protein_coding	K06C4.12	0.585784	0.0587294
his-24	WBGene00001898	protein_coding	M163.3	2.02032	6.10991e-16
his-25	WBGene00001899	protein_coding	ZK131.2	1.11524	0.000583304
his-26	WBGene00001900	protein_coding	ZK131.1	0.826206	0.00932791
his-27	WBGene00001901	protein_coding	K06C4.13	0.36442	0.325222
his-28	WBGene00001902	protein_coding	K06C4.2	0.428417	0.356421
his-29	WBGene00001903	protein_coding	F35H10.11	0.458945	0.346629
his-30	WBGene00001904	protein_coding	F35H10.1	0.0955407	NA
his-31	WBGene00001905	protein_coding	F17E9.12	0.124668	NA
his-32	WBGene00001906	protein_coding	F17E9.10	0.767115	0.0811051
his-33	WBGene00001907	protein_coding	F17E9.13	0.0485746	NA
his-34	WBGene00001908	protein_coding	F17E9.9	0.185445	0.745896
his-35	WBGene00001909	protein_coding	C50F4.13	-0.244069	0.187565
C50F4.6	WBGene00001910	protein_coding	C50F4.6	0.0764137	0.820342
his-37	WBGene00001911	protein_coding	C50F4.7	0.703525	0.00215734
his-38	WBGene00001912	protein_coding	K03A1.6	-0.0666766	0.919922
his-39	WBGene00001913	protein_coding	F45F2.2	0.333488	0.531246
his-40	WBGene00001914	protein_coding	K03A1.1	0.618313	0.170443
his-41	WBGene00001915	protein_coding	C50F4.5	0.0424343	0.88138
his-42	WBGene00001916	protein_coding	F08G2.3	1.07671	0.00219003
his-43	WBGene00001917	protein_coding	F08G2.2	0.296309	0.524611
his-44	WBGene00001918	protein_coding	F08G2.1	0.305881	0.430925
his-45	WBGene00001919	protein_coding	B0035.10	0.962763	0.0232185
his-46	WBGene00001920	protein_coding	B0035.9	0.778518	0.0732836
his-47	WBGene00001921	protein_coding	B0035.7	0.887385	0.0375312
his-48	WBGene00001922	protein_coding	B0035.8	0.800406	0.0629501
his-49	WBGene00001923	protein_coding	F07B7.5	0.35013	0.343254
his-50	WBGene00001924	protein_coding	F07B7.9	0.269553	0.586145
his-51	WBGene00001925	protein_coding	F07B7.10	0.306797	0.431576
his-52	WBGene00001926	protein_coding	F07B7.4	0.540567	0.0961931
his-53	WBGene00001927	protein_coding	F07B7.3	0.407758	0.279939
his-54	WBGene00001928	protein_coding	F07B7.11	0.535486	0.069453
his-55	WBGene00001929	protein_coding	F54E12.1	0.982581	0.0191129
his-56	WBGene00001930	protein_coding	F54E12.3	1.00713	0.00810097
his-57	WBGene00001931	protein_coding	F54E12.5	0.898823	0.0307539
his-58	WBGene00001932	protein_coding	F54E12.4	0.77386	0.0721902
his-59	WBGene00001933	protein_coding	F55G1.2	1.13869	0.00434633
his-60	WBGene00001934	protein_coding	F55G1.11	0.842599	0.0273784
his-61	WBGene00001935	protein_coding	F55G1.10	0.995477	0.0188722
his-62	WBGene00001936	protein_coding	F55G1.3	1.0116	0.0118923
his-63	WBGene00001937	protein_coding	F22B3.2	1.05129	0.0111748
his-64	WBGene00001938	protein_coding	F22B3.1	0.895374	0.0375847
his-65	WBGene00001939	protein_coding	H02I12.7	0.845551	0.0508972
his-66	WBGene00001940	protein_coding	H02I12.6	0.777087	0.0719602
his-67	WBGene00001941	protein_coding	T23D8.5	1.24764	0.000870299
his-68	WBGene00001942	protein_coding	T23D8.6	1.07934	0.0078348
his-69	WBGene00001943	protein_coding	E03A3.3	0.335495	NA
his-70	WBGene00001944	protein_coding	E03A3.4	-0.00350657	NA
his-71	WBGene00001945	protein_coding	F45E1.6	0.197886	0.325704
his-72	WBGene00001946	protein_coding	Y49E10.6	0.0650177	0.782178
his-73	WBGene00001947	protein_coding	W09H1.2	0.535227	0.251585
hlh-1	WBGene00001948	protein_coding	B0304.1	0.0298184	0.913327
hlh-2	WBGene00001949	protein_coding	M05B5.5	-0.045409	0.887921
hlh-3	WBGene00001950	protein_coding	T24B8.6	0.74382	0.014364
hlh-4	WBGene00001951	protein_coding	T05G5.2	-0.4872	0.305053
hlh-6	WBGene00001952	protein_coding	T15H9.3	-0.173563	0.756623
hlh-8	WBGene00001953	protein_coding	C02B8.4	-0.088734	0.854923
hlh-10	WBGene00001954	protein_coding	ZK682.4	-0.431216	0.324006
hlh-11	WBGene00001955	protein_coding	F58A4.7	0.147191	0.523126
hlh-12	WBGene00001956	protein_coding	C28C12.8	0.0132035	NA
hlh-13	WBGene00001957	protein_coding	F48D6.3	-0.418316	0.355918
hlh-14	WBGene00001958	protein_coding	C18A3.8	0.212331	NA
hlh-15	WBGene00001959	protein_coding	C43H6.8	-0.0678253	NA
hlh-16	WBGene00001960	protein_coding	DY3.3	-0.0272584	0.962528
hlh-17	WBGene00001961	protein_coding	F38C2.2	-0.0100315	NA
hlh-19	WBGene00001962	protein_coding	F57C12.3	0.190301	NA
btb-1	WBGene00001963	protein_coding	F40G9.4	0.508082	0.206267
hlh-25	WBGene00001964	protein_coding	C17C3.7	0	NA
hlh-26	WBGene00001965	protein_coding	C17C3.8	0	NA
hlh-27	WBGene00001966	protein_coding	C17C3.10	0	NA
hlh-28	WBGene00001967	protein_coding	F31A3.2	0	NA
hlh-29	WBGene00001968	protein_coding	F31A3.4	-0.0348944	NA
hmg-1.1	WBGene00001971	protein_coding	Y48B6A.14	0.595705	0.0103091
hmg-1.2	WBGene00001972	protein_coding	F47D12.4	-0.421497	0.00273426
hmg-3	WBGene00001973	protein_coding	C32F10.5	1.0628	0.00811345
hmg-4	WBGene00001974	protein_coding	T20B12.8	-0.0729267	0.807347
hmg-5	WBGene00001975	protein_coding	F45E4.9	0.0694353	0.854923
hmg-11	WBGene00001976	protein_coding	T05A7.4	0.377137	0.0571302
hmg-12	WBGene00001977	protein_coding	Y17G7A.1	0.702909	0.0770921
hmp-1	WBGene00001978	protein_coding	R13H4.4	0.0451288	0.832999
hmp-2	WBGene00001979	protein_coding	K05C4.6	0.161721	0.41377
hmr-1	WBGene00001980	protein_coding	W02B9.1	0.0671977	0.718841
hnd-1	WBGene00001981	protein_coding	C44C10.8	0.0978637	NA
hoe-1	WBGene00001983	protein_coding	E04A4.4	0.174201	0.561027
hog-1	WBGene00001984	protein_coding	W06B11.4	0.246367	0.561187
hop-1	WBGene00001985	protein_coding	C18E3.8	0.977164	0.0184958
hot-1	WBGene00001986	protein_coding	F43D2.4	-0.111872	0.69647
hot-2	WBGene00001987	protein_coding	Y39B6A.48	-0.0755909	0.832999
hot-3	WBGene00001988	protein_coding	W02B8.5	-0.679428	0.00586831
hot-4	WBGene00001989	protein_coding	T12A2.16	-0.345663	0.181883
hot-5	WBGene00001990	protein_coding	K07A12.6	-0.354932	0.204696
hot-6	WBGene00001991	protein_coding	C13G3.2	-0.269219	0.397868
hot-7	WBGene00001992	protein_coding	Y48B6A.9	-0.287823	0.44131
hpd-1	WBGene00001993	protein_coding	T21C12.2	-0.583459	0.017082
hpk-1	WBGene00001994	protein_coding	F20B6.8	0.0785233	0.838928
hpl-1	WBGene00001995	protein_coding	K08H2.6	-0.0539729	0.875102
hpl-2	WBGene00001996	protein_coding	K01G5.2	0.158239	0.62641
hpr-9	WBGene00001997	protein_coding	Y39A1A.23	0.357601	0.38654
hpr-17	WBGene00001998	protein_coding	F32A11.2	0.90426	0.0375312
hrp-1	WBGene00001999	protein_coding	F42A6.7	0.385579	0.0682177
hrp-2	WBGene00002000	protein_coding	F58D5.1	0.257052	0.189777
hars-1	WBGene00002001	protein_coding	T11G6.1	0.00518415	0.986713
hsb-1	WBGene00002002	protein_coding	K08E7.2	0.0694573	0.832999
hse-5	WBGene00002003	protein_coding	B0285.5	0.0709027	0.848519
hsf-1	WBGene00002004	protein_coding	Y53C10A.12	-0.0831204	0.638699
hsp-1	WBGene00002005	protein_coding	F26D10.3	-0.493032	0.141448
hsp-3	WBGene00002007	protein_coding	C15H9.6	-0.575808	0.0197588
hsp-4	WBGene00002008	protein_coding	F43E2.8	-2.41552	1.56258e-19
hsp-6	WBGene00002010	protein_coding	C37H5.8	-0.094387	0.735617
hsp-12.2	WBGene00002011	protein_coding	C14B9.1	-0.225553	0.675191
hsp-12.3	WBGene00002012	protein_coding	F38E11.1	0.12174	0.85335
hsp-12.6	WBGene00002013	protein_coding	F38E11.2	0.317981	0.554507
hsp-16.1	WBGene00002015	protein_coding	T27E4.8	-0.0404205	0.949169
hsp-16.2	WBGene00002016	protein_coding	Y46H3A.3	-0.0336753	0.956278
hsp-16.11	WBGene00002017	protein_coding	T27E4.2	-0.00888374	0.989507
hsp-16.41	WBGene00002018	protein_coding	Y46H3A.2	-0.00964311	0.987726
hsp-16.48	WBGene00002019	protein_coding	T27E4.3	-0.0312806	0.963085
hsp-16.49	WBGene00002020	protein_coding	T27E4.9	-0.00644442	0.99183
hsp-17	WBGene00002021	protein_coding	F52E1.7	-0.970625	0.000317334
hsp-25	WBGene00002023	protein_coding	C09B8.6	-0.275878	0.168419
hsp-43	WBGene00002024	protein_coding	C14F11.5	-0.611379	0.0640888
hsp-60	WBGene00002025	protein_coding	Y22D7AL.5	-0.138757	0.609717
hsp-70	WBGene00002026	protein_coding	C12C8.1	0.103799	0.84757
hsr-9	WBGene00002027	protein_coding	T05F1.6	0.136124	0.609386
hst-1	WBGene00002028	protein_coding	F08B4.6	0.217032	0.380639
hst-2	WBGene00002029	protein_coding	C34F6.4	0.0607745	0.858203
hst-3.1	WBGene00002030	protein_coding	F40H3.5	-0.467084	0.115604
hst-6	WBGene00002031	protein_coding	Y34B4A.3	-0.0491445	0.888772
htp-1	WBGene00002032	protein_coding	F41H10.10	0.79697	0.0730687
htp-2	WBGene00002033	protein_coding	Y73B6BL.2	0.465892	0.342701
htp-3	WBGene00002034	protein_coding	F57C9.5	1.16611	0.00494866
hum-1	WBGene00002035	protein_coding	F29D10.4	0.103207	0.46191
hum-2	WBGene00002036	protein_coding	F36D4.3	-0.022619	0.917835
hum-4	WBGene00002037	protein_coding	F46C3.3	0.078838	0.781567
hum-5	WBGene00002038	protein_coding	T02C12.1	0.0902419	0.716391
hum-6	WBGene00002039	protein_coding	T10H10.1	0.386772	0.0696394
hum-7	WBGene00002040	protein_coding	F56A6.2	-0.0417999	0.91631
hum-8	WBGene00002041	protein_coding	Y66H1A.6	0.0738659	0.790862
hus-1	WBGene00002042	protein_coding	H26D21.1	0.409862	0.331657
hyl-1	WBGene00002043	protein_coding	C09G4.1	0.422866	0.144339
hyl-2	WBGene00002044	protein_coding	K02G10.6	0.35294	0.0426377
icd-1	WBGene00002045	protein_coding	C56C10.8	0.0843052	0.553314
icln-1	WBGene00002046	protein_coding	C01F6.8	-0.125485	0.552005
icp-1	WBGene00002047	protein_coding	Y39G10AR.13	0.618469	0.121256
ida-1	WBGene00002048	protein_coding	B0244.2	-0.240397	0.579119
ifa-1	WBGene00002050	protein_coding	F38B2.1	-0.358139	0.389125
ifa-3	WBGene00002051	protein_coding	F52E10.5	0.158367	0.796677
ifa-4	WBGene00002052	protein_coding	K05B2.3	-0.248415	0.251667
ifb-1	WBGene00002053	protein_coding	F10C1.2	-0.377858	0.148366
ifb-2	WBGene00002054	protein_coding	F10C1.7	0.0925118	0.702141
ifc-1	WBGene00002055	protein_coding	F37B4.2	-0.953139	1.19975e-06
ifc-2	WBGene00002056	protein_coding	M6.1	0.322584	0.195885
ifd-1	WBGene00002057	protein_coding	R04E5.10	0.0544364	0.86026
ifd-2	WBGene00002058	protein_coding	F25E2.4	0.0538963	0.904687
ife-1	WBGene00002059	protein_coding	F53A2.6	0.16452	0.486962
ife-2	WBGene00002060	protein_coding	R04A9.4	-0.146701	0.513802
ife-3	WBGene00002061	protein_coding	B0348.6	0.291889	0.344262
ife-4	WBGene00002062	protein_coding	C05D9.5	0.177663	0.6215
ife-5	WBGene00002063	protein_coding	Y57A10A.30	0.802656	0.0123393
iff-1	WBGene00002064	protein_coding	T05G5.10	0.69388	0.130611
iff-2	WBGene00002065	protein_coding	F54C9.1	0.0397551	0.870982
ifg-1	WBGene00002066	protein_coding	M110.4	0.0674014	0.798252
ifp-1	WBGene00002067	protein_coding	C43C3.1	-0.277504	0.191775
ify-1	WBGene00002068	protein_coding	C27A2.3	0.329845	0.528086
ikb-1	WBGene00002069	protein_coding	C04F12.3	0.0075675	0.98588
ile-1	WBGene00002070	protein_coding	K07A1.8	-0.216608	0.355454
ile-2	WBGene00002071	protein_coding	T04G9.3	0.113429	0.657615
ima-1	WBGene00002072	protein_coding	T19B10.7	0.111786	0.661776
ima-2	WBGene00002073	protein_coding	F26B1.3	0.498572	0.307936
ima-3	WBGene00002074	protein_coding	F32E10.4	0.0360409	0.888566
imb-1	WBGene00002075	protein_coding	F28B3.8	-0.0482525	0.871535
imb-2	WBGene00002076	protein_coding	R06A4.4	0.206096	0.210677
imb-3	WBGene00002077	protein_coding	C53D5.6	0.0173848	0.964392
xpo-1	WBGene00002078	protein_coding	ZK742.1	0.0726445	0.823681
xpo-2	WBGene00002079	protein_coding	Y48G1A.5	0.145696	0.702932
xpo-3	WBGene00002080	protein_coding	C49H3.10	0.100725	0.729494
ina-1	WBGene00002081	protein_coding	F54G8.3	0.123123	0.66494
inf-1	WBGene00002083	protein_coding	F57B9.6	-0.0364914	0.918916
ins-1	WBGene00002084	protein_coding	F13B12.5	-0.189711	0.630513
ins-2	WBGene00002085	protein_coding	ZK75.2	-0.0881399	NA
ins-3	WBGene00002086	protein_coding	ZK75.3	-0.338866	0.409135
ins-4	WBGene00002087	protein_coding	ZK75.1	0.0977273	0.884098
ins-5	WBGene00002088	protein_coding	ZK84.3	-0.546603	0.217585
ins-6	WBGene00002089	protein_coding	ZK84.6	-0.121963	0.83258
ins-7	WBGene00002090	protein_coding	ZK1251.2	0.0531161	NA
ins-8	WBGene00002091	protein_coding	ZK1251.11	0	NA
ins-9	WBGene00002092	protein_coding	C06E2.8	0.0294469	NA
ins-10	WBGene00002093	protein_coding	T08G5.12	-0.166068	0.733767
ins-11	WBGene00002094	protein_coding	C17C3.4	-0.569793	0.230127
ins-12	WBGene00002095	protein_coding	C17C3.19	-0.0410192	NA
ins-13	WBGene00002096	protein_coding	C17C3.18	-0.100301	0.880896
ins-14	WBGene00002097	protein_coding	F41G3.16	-0.212076	0.689039
ins-15	WBGene00002098	protein_coding	F41G3.17	-0.102692	NA
ins-16	WBGene00002099	protein_coding	Y39A3A.5	0.189887	NA
ins-17	WBGene00002100	protein_coding	F56F3.6	-0.393707	0.231957
ins-18	WBGene00002101	protein_coding	T28B8.2	-0.51936	0.0123376
ins-19	WBGene00002102	protein_coding	T10D4.13	0.134492	NA
ins-20	WBGene00002103	protein_coding	ZK84.7	0.192434	NA
ins-21	WBGene00002104	protein_coding	M04D8.1	-0.395656	NA
ins-22	WBGene00002105	protein_coding	M04D8.2	-0.869715	0.0375312
ins-23	WBGene00002106	protein_coding	M04D8.3	-0.0371476	NA
ins-24	WBGene00002107	protein_coding	ZC334.3	-0.501736	0.187866
ins-25	WBGene00002108	protein_coding	ZC334.8	0.317218	NA
ins-26	WBGene00002109	protein_coding	ZC334.1	0.297748	0.583273
ins-27	WBGene00002110	protein_coding	ZC334.11	0.0713801	0.869347
ins-28	WBGene00002111	protein_coding	ZC334.9	0.275864	0.609721
ins-29	WBGene00002112	protein_coding	ZC334.10	-0.104686	NA
ins-30	WBGene00002113	protein_coding	ZC334.2	-0.263092	0.53723
ins-31	WBGene00002114	protein_coding	T10D4.4	-0.185875	NA
ins-32	WBGene00002115	protein_coding	Y8A9A.6	0.0149442	NA
ins-33	WBGene00002116	protein_coding	W09C5.4	-0.152777	NA
ins-34	WBGene00002117	protein_coding	F52B11.6	0.22279	NA
ins-35	WBGene00002118	protein_coding	K02E2.4	-0.0764125	0.912172
ins-36	WBGene00002119	protein_coding	Y53H1A.4	0.500715	0.17807
ins-37	WBGene00002120	protein_coding	F08G2.6	0.244487	0.662389
ins-38	WBGene00002121	protein_coding	C17C3.20	-0.000793186	NA
inx-1	WBGene00002123	protein_coding	C16E9.4	-0.178743	0.581368
inx-2	WBGene00002124	protein_coding	F08G12.10	-0.147679	0.796574
inx-3	WBGene00002125	protein_coding	F22F4.2	-0.115254	0.844943
inx-5	WBGene00002127	protein_coding	R09F10.4	-0.334554	0.0783222
inx-6	WBGene00002128	protein_coding	C36H8.2	-0.326681	0.469739
inx-7	WBGene00002129	protein_coding	K02B2.4	-0.29083	0.19649
inx-8	WBGene00002130	protein_coding	ZK792.2	0.481609	0.305645
inx-9	WBGene00002131	protein_coding	ZK792.3	0.385924	0.443026
inx-10	WBGene00002132	protein_coding	T18H9.5	-0.41787	0.0697078
inx-11	WBGene00002133	protein_coding	W04D2.3	-0.132875	0.679549
inx-12	WBGene00002134	protein_coding	ZK770.3	-0.423913	0.0110649
inx-13	WBGene00002135	protein_coding	Y8G1A.2	-0.412461	0.0264986
inx-14	WBGene00002136	protein_coding	F07A5.1	0.663679	0.0427611
inx-15	WBGene00002137	protein_coding	R12E2.9	0.44476	0.0444074
inx-16	WBGene00002138	protein_coding	R12E2.5	0.377836	0.106327
inx-17	WBGene00002139	protein_coding	R12E2.4	0.412298	0.0524352
inx-18	WBGene00002140	protein_coding	C18H7.2	-0.12874	0.60705
inx-19	WBGene00002141	protein_coding	T16H5.1	-0.509698	0.0508382
inx-20	WBGene00002142	protein_coding	T23H4.1	-0.473214	0.10493
inx-21	WBGene00002143	protein_coding	Y47G6A.1	0.827936	0.0561114
inx-22	WBGene00002144	protein_coding	Y47G6A.2	0.754934	0.0920485
ipp-5	WBGene00002146	protein_coding	C09B8.1	-0.0300541	0.91631
ire-1	WBGene00002147	protein_coding	C41C4.4	-0.125174	0.449844
gon-14	WBGene00002148	protein_coding	F44C4.4	0.115119	0.530948
irk-1	WBGene00002149	protein_coding	R03E9.4	-0.30356	0.274078
irk-2	WBGene00002150	protein_coding	M02A10.2	-0.0897713	0.76543
irk-3	WBGene00002151	protein_coding	K04G11.5	-0.256936	0.340349
iars-1	WBGene00002152	protein_coding	R11A8.6	0.0918608	0.727445
iars-2	WBGene00002153	protein_coding	C25A1.7	0.198428	0.428415
isp-1	WBGene00002162	protein_coding	F42G8.12	0.15627	0.365161
ist-1	WBGene00002163	protein_coding	C54D1.3	0.343799	0.183828
isw-1	WBGene00002169	protein_coding	F37A4.8	0.141785	0.538726
itr-1	WBGene00002173	protein_coding	F33D4.2	-0.0243846	0.91931
itx-1	WBGene00002174	protein_coding	W03D8.6	0.157504	0.451863
jac-1	WBGene00002175	protein_coding	Y105C5B.21	0.0321603	0.869375
jip-1	WBGene00002176	protein_coding	F56D12.4	-0.356437	0.155494
jkk-1	WBGene00002177	protein_coding	F35C8.3	-0.288363	0.279868
jnk-1	WBGene00002178	protein_coding	B0478.1	-0.414624	0.0264038
jph-1	WBGene00002179	protein_coding	T22C1.7	-0.2733	0.194593
jtr-1	WBGene00002180	protein_coding	Y77E11A.4	0.0955426	0.812635
kal-1	WBGene00002181	protein_coding	K03D10.1	-0.306274	0.159915
kap-1	WBGene00002182	protein_coding	F08F8.3	-0.314776	0.344522
kat-1	WBGene00002183	protein_coding	T02G5.8	0.0991425	0.765439
kel-1	WBGene00002184	protein_coding	C47D12.7	0.0353191	0.91631
kel-3	WBGene00002185	protein_coding	T27E9.4	-0.170744	0.144721
kel-10	WBGene00002186	protein_coding	T16H12.6	0.00115169	NA
kgb-1	WBGene00002187	protein_coding	T07A9.3	-0.17946	0.214262
kgb-2	WBGene00002188	protein_coding	ZC416.4	0.309749	0.503948
kin-1	WBGene00002189	protein_coding	ZK909.2	-0.148469	0.393035
kin-2	WBGene00002190	protein_coding	R07E4.6	-0.093977	0.733692
kin-3	WBGene00002191	protein_coding	B0205.7	0.0617162	0.699323
kin-4	WBGene00002192	protein_coding	C10C6.1	-0.217968	0.266886
kin-5	WBGene00002193	protein_coding	T13H10.1	0.0628395	NA
kin-6	WBGene00002194	protein_coding	ZK20.2	-0.0370767	NA
kin-9	WBGene00002195	protein_coding	F08F1.1	-0.190108	0.633623
kin-10	WBGene00002196	protein_coding	T01G9.6	0.0545172	0.856724
kin-14	WBGene00002198	protein_coding	F22D6.1	-0.133316	0.812635
kin-15	WBGene00002199	protein_coding	M176.6	-0.779137	0.000600893
kin-16	WBGene00002200	protein_coding	M176.7	-0.0142264	0.965844
kin-18	WBGene00002201	protein_coding	T17E9.1	0.0343555	0.893378
kin-19	WBGene00002202	protein_coding	C03C10.1	0.19686	0.44388
kin-20	WBGene00002203	protein_coding	F46F2.2	0.0195126	0.929501
kin-21	WBGene00002204	protein_coding	W08D2.8	0	NA
kin-23	WBGene00002205	protein_coding	W04G5.6	0.0740975	0.909619
kin-24	WBGene00002206	protein_coding	K07F5.4	-0.0194574	NA
sid-3	WBGene00002207	protein_coding	B0302.1	0.0535254	0.870273
kin-26	WBGene00002208	protein_coding	T06C10.6	-0.0250411	NA
kin-29	WBGene00002210	protein_coding	F58H12.1	-0.216352	0.138908
kin-30	WBGene00002211	protein_coding	M01B2.1	-0.0283914	0.966272
kin-31	WBGene00002212	protein_coding	B0523.1	1.05655	NA
kin-32	WBGene00002213	protein_coding	C30F8.4	-0.310183	0.0421867
klc-1	WBGene00002214	protein_coding	M7.2	0.550529	0.120814
klc-2	WBGene00002215	protein_coding	C18C4.10	-0.275388	0.187565
klp-3	WBGene00002216	protein_coding	T09A5.2	-0.431888	0.0811051
klp-4	WBGene00002217	protein_coding	F56E3.3	-0.133604	0.548729
klp-6	WBGene00002218	protein_coding	R144.1	-0.306645	0.0836764
klp-7	WBGene00002219	protein_coding	K11D9.1	0.199773	0.536532
klp-8	WBGene00002220	protein_coding	C15C7.2	0.402402	0.0179622
klp-11	WBGene00002222	protein_coding	F20C5.2	-0.140501	0.351527
klp-12	WBGene00002223	protein_coding	T01G1.1	-0.0509488	0.748085
klp-13	WBGene00002224	protein_coding	F22F4.3	-0.0590466	0.865396
klp-15	WBGene00002225	protein_coding	M01E11.6	1.15255	0.00384019
klp-16	WBGene00002226	protein_coding	C41G7.2	0.707929	0.0409328
klp-17	WBGene00002227	protein_coding	W02B12.7	0.0270871	0.946288
klp-18	WBGene00002228	protein_coding	C06G3.2	0.756696	0.0880424
klp-19	WBGene00002229	protein_coding	Y43F4B.6	-0.24817	0.254882
klp-20	WBGene00002230	protein_coding	Y50D7A.6	0.23556	0.41377
knl-1	WBGene00002231	protein_coding	C02F5.1	0.445991	0.299433
kpc-1	WBGene00002232	protein_coding	F11A6.1	-0.113587	0.550009
kqt-1	WBGene00002233	protein_coding	C25B8.1	-0.433037	0.137821
kqt-2	WBGene00002234	protein_coding	M60.5	0.0255591	0.947948
kqt-3	WBGene00002235	protein_coding	Y54G9A.3	-0.257042	0.399874
kars-1	WBGene00002238	protein_coding	T02G5.9	-0.0335207	0.934227
ksr-1	WBGene00002239	protein_coding	F13B9.5	-0.234922	0.271086
ksr-2	WBGene00002240	protein_coding	F58D5.4	0.171595	0.431504
kup-1	WBGene00002241	protein_coding	F10C2.2	0.0812409	0.689449
kvs-1	WBGene00002242	protein_coding	C53C9.3	-0.425571	0.0816497
lad-2	WBGene00002243	protein_coding	Y54G2A.25	-0.762938	0.000578813
laf-1	WBGene00002244	protein_coding	Y71H2AM.19	-0.145465	0.586397
lag-1	WBGene00002245	protein_coding	K08B4.1	0.256673	0.0902399
lag-2	WBGene00002246	protein_coding	Y73C8B.4	0.221943	0.69782
lam-1	WBGene00002247	protein_coding	W03F8.5	-0.111354	0.534659
lam-3	WBGene00002248	protein_coding	T22A3.8	0.411533	0.41377
lap-1	WBGene00002249	protein_coding	ZK353.6	0.0819007	0.710934
lap-2	WBGene00002250	protein_coding	W07G4.4	0.500596	0.141661
lat-1	WBGene00002251	protein_coding	B0457.1	-0.00130633	0.996043
lat-2	WBGene00002252	protein_coding	B0286.2	-0.0799077	0.897464
lbp-1	WBGene00002253	protein_coding	F40F4.3	-0.259289	0.363201
lbp-2	WBGene00002254	protein_coding	F40F4.2	-0.196419	0.558268
lbp-3	WBGene00002255	protein_coding	F40F4.4	-0.104087	0.826651
lbp-4	WBGene00002256	protein_coding	ZK742.5	-0.0747063	0.835593
lbp-5	WBGene00002257	protein_coding	W02D3.7	-0.165363	0.638681
lbp-6	WBGene00002258	protein_coding	W02D3.5	-0.036224	0.912445
lbp-7	WBGene00002259	protein_coding	T22G5.2	0.239175	0.559327
lbp-8	WBGene00002260	protein_coding	T22G5.6	-0.186688	NA
ldb-1	WBGene00002261	protein_coding	F58A3.1	-0.157652	0.377403
ldh-1	WBGene00002262	protein_coding	F13D12.2	-0.320027	0.227279
lea-1	WBGene00002263	protein_coding	K08H10.1	0.413387	0.184362
lec-1	WBGene00002264	protein_coding	W09H1.6	-0.0234909	0.932101
lec-2	WBGene00002265	protein_coding	F52H3.7	0.0951883	0.796677
lec-3	WBGene00002266	protein_coding	ZK892.1	-0.339581	0.222689
lec-4	WBGene00002267	protein_coding	C44F1.3	-0.444967	0.0569836
lec-5	WBGene00002268	protein_coding	ZK1248.16	0.253242	0.239146
lec-6	WBGene00002269	protein_coding	Y55B1AR.1	-0.344395	0.101354
lec-7	WBGene00002270	protein_coding	R07B1.2	-0.341574	0.405874
lec-8	WBGene00002271	protein_coding	R07B1.10	-0.700066	0.00952705
lec-9	WBGene00002272	protein_coding	C16H3.2	-0.524197	0.00803232
lec-10	WBGene00002273	protein_coding	W01A11.4	-0.481569	0.0410437
lec-11	WBGene00002274	protein_coding	F38A5.3	0.0114103	0.979905
lem-2	WBGene00002275	protein_coding	W01G7.5	0.515492	0.140536
lem-3	WBGene00002276	protein_coding	F42H11.2	0.44793	0.160768
let-2	WBGene00002280	protein_coding	F01G12.5	-0.321309	0.178046
let-4	WBGene00002282	protein_coding	C44H4.2	-0.147116	0.643707
let-19	WBGene00002295	protein_coding	K08F8.6	-0.0702548	0.69112
ect-2	WBGene00002297	protein_coding	T19E10.1	0.730544	0.0759513
let-23	WBGene00002299	protein_coding	ZK1067.1	0.0406343	0.861166
let-49	WBGene00002324	protein_coding	Y54E5B.3	0.303468	0.321957
let-60	WBGene00002335	protein_coding	ZK792.6	0.00818558	0.969473
let-70	WBGene00002344	protein_coding	M7.1	-0.143272	0.200383
myo-1	WBGene00002348	protein_coding	R06C7.10	-0.224289	0.669121
let-92	WBGene00002363	protein_coding	F38H4.9	0.0379519	0.835593
let-99	WBGene00002368	protein_coding	K08E7.3	0.808376	0.0680618
lpr-1	WBGene00002393	protein_coding	Y65B4BR.2	0.491706	NA
let-268	WBGene00002497	protein_coding	F52H3.1	0.141372	0.669639
let-363	WBGene00002583	protein_coding	B0261.2	0.0218914	0.91631
let-381	WBGene00002601	protein_coding	F26B1.7	0.406282	0.173996
let-413	WBGene00002632	protein_coding	F26D11.11	0.0166949	0.940121
let-418	WBGene00002637	protein_coding	F26F12.7	0.409691	0.0245104
let-502	WBGene00002694	protein_coding	C10H11.9	0.320561	0.0733858
let-504	WBGene00002696	protein_coding	E01A2.4	0.160952	0.672018
let-526	WBGene00002717	protein_coding	C01G8.9	-0.101282	0.694836
let-607	WBGene00002783	protein_coding	F57B10.1	-0.459593	0.00336602
let-653	WBGene00002827	protein_coding	C29E6.1	-0.246332	0.531249
let-711	WBGene00002845	protein_coding	F57B9.2	0.0810911	0.752439
let-716	WBGene00002850	protein_coding	C16A3.3	-0.199411	0.431043
let-721	WBGene00002855	protein_coding	C05D11.12	-0.309872	0.0597559
let-754	WBGene00002879	protein_coding	C29E4.8	0.115154	0.670607
let-756	WBGene00002881	protein_coding	C05D11.4	-0.0549537	0.835593
let-765	WBGene00002889	protein_coding	F20H11.2	-0.0894305	0.658202
let-767	WBGene00002891	protein_coding	C56G2.6	0.369724	0.144812
let-805	WBGene00002915	protein_coding	H19M22.2	0.053238	0.888014
let-858	WBGene00002957	protein_coding	F33A8.1	0.165091	0.596697
lev-1	WBGene00002974	protein_coding	F09E8.7	0.174738	0.254235
lev-8	WBGene00002975	protein_coding	C35C5.5	0.325739	0.355918
lev-9	WBGene00002976	protein_coding	T07H6.5	0.141583	0.699312
lev-10	WBGene00002977	protein_coding	Y105E8A.7	-0.193278	0.391696
lev-11	WBGene00002978	protein_coding	Y105E8B.1	-0.0639755	0.88138
lfe-2	WBGene00002979	protein_coding	C46H11.4	0.122854	0.365767
lgg-1	WBGene00002980	protein_coding	C32D5.9	-0.404579	0.00494866
lgg-2	WBGene00002981	protein_coding	ZK593.6	-0.555606	0.00038782
lgg-3	WBGene00002982	protein_coding	B0336.8	0.120206	0.743524
lgx-1	WBGene00002983	protein_coding	C54G7.3	-0.208104	0.720147
lig-1	WBGene00002985	protein_coding	C29A12.3	0.596619	0.0802704
lig-4	WBGene00002986	protein_coding	C07H6.1	-0.16471	0.618372
lim-4	WBGene00002987	protein_coding	ZC64.4	-0.19767	0.680548
lim-6	WBGene00002988	protein_coding	K03E6.1	-0.19621	0.618264
lim-7	WBGene00002989	protein_coding	C04F1.3	-0.258855	0.527127
lin-1	WBGene00002990	protein_coding	C37F5.1	0.144792	0.380812
lin-2	WBGene00002991	protein_coding	F17E5.1	-0.0652557	0.778034
lin-3	WBGene00002992	protein_coding	F36H1.4	-0.0879401	0.79346
lin-5	WBGene00002994	protein_coding	T09A5.10	0.107417	0.629589
lin-7	WBGene00002996	protein_coding	Y54G11A.10	-0.139393	0.529368
lin-8	WBGene00002997	protein_coding	B0454.1	0.278351	0.197761
lin-9	WBGene00002998	protein_coding	ZK637.7	1.0241	7.24005e-08
lin-10	WBGene00002999	protein_coding	C09H6.2	-0.138797	0.5336
lin-11	WBGene00003000	protein_coding	ZC247.3	-0.577442	0.00343927
lin-12	WBGene00003001	protein_coding	R107.8	-0.121083	0.752049
lin-13	WBGene00003002	protein_coding	C03B8.4	0.530434	0.000259172
lin-14	WBGene00003003	protein_coding	T25C12.1	0.12717	0.465543
lin-17	WBGene00003006	protein_coding	Y71F9B.5	-0.281071	0.305179
lin-18	WBGene00003007	protein_coding	C16B8.1	-0.13302	0.659783
lin-22	WBGene00003008	protein_coding	Y54G2A.1	0.111841	0.81595
lin-23	WBGene00003009	protein_coding	K10B2.1	-0.0908833	0.516197
lin-24	WBGene00003010	protein_coding	B0001.1	-0.193553	0.353137
lin-25	WBGene00003011	protein_coding	F56H9.5	-0.144112	0.452122
lin-26	WBGene00003012	protein_coding	F18A1.2	0.0717733	0.848438
lin-28	WBGene00003014	protein_coding	F02E9.2	-0.116945	0.417554
lin-29	WBGene00003015	protein_coding	W03C9.4	0.257798	0.479503
lin-31	WBGene00003017	protein_coding	K10G6.1	-0.628673	0.020267
lin-32	WBGene00003018	protein_coding	T14F9.5	0.300325	0.532603
lin-33	WBGene00003019	protein_coding	H32C10.2	-0.240642	0.190753
lin-35	WBGene00003020	protein_coding	C32F10.2	0.514284	0.00117656
lin-36	WBGene00003021	protein_coding	F44B9.6	0.169226	0.4504
lin-37	WBGene00003022	protein_coding	ZK418.4	0.380141	0.0927654
lin-39	WBGene00003024	protein_coding	C07H6.7	0.834058	0.00712252
lin-40	WBGene00003025	protein_coding	T27C4.4	0.00109292	0.997428
lin-41	WBGene00003026	protein_coding	C12C8.3	-0.00593194	0.983679
lin-44	WBGene00003029	protein_coding	E01A2.3	-0.357794	0.349992
lin-45	WBGene00003030	protein_coding	Y73B6A.5	-0.354762	0.00284744
lin-46	WBGene00003031	protein_coding	R186.4	-0.105187	0.791612
lin-48	WBGene00003033	protein_coding	F34D10.5	-0.491222	0.120865
lin-49	WBGene00003034	protein_coding	F42A9.2	-0.0350823	0.856751
lin-52	WBGene00003035	protein_coding	ZK632.13	-0.160965	0.592254
lin-53	WBGene00003036	protein_coding	K07A1.12	0.269882	0.440533
lin-54	WBGene00003037	protein_coding	JC8.6	0.330243	0.403523
lin-56	WBGene00003038	protein_coding	ZK673.3	0.490593	0.037388
lin-59	WBGene00003040	protein_coding	T12F5.4	-0.0210538	0.938078
lin-61	WBGene00003041	protein_coding	R06C7.7	0.0835684	0.780452
lip-1	WBGene00003043	protein_coding	C05B10.1	-0.350939	0.0304921
lir-1	WBGene00003044	protein_coding	F18A1.3	0.0205851	0.951397
lir-2	WBGene00003045	protein_coding	F18A1.4	-0.154976	0.529728
lir-3	WBGene00003046	protein_coding	F37H8.1	0.863311	0.00233454
lis-1	WBGene00003047	protein_coding	T03F6.5	-0.170375	0.330718
lit-1	WBGene00003048	protein_coding	W06F12.1	0.0698535	0.733879
lmn-1	WBGene00003052	protein_coding	DY3.2	-0.320969	0.0991933
lmp-1	WBGene00003053	protein_coding	C03B1.12	0.293568	0.0661391
lon-1	WBGene00003055	protein_coding	F48E8.1	0.434964	0.346521
lon-2	WBGene00003056	protein_coding	C39E6.1	0.0980109	0.701431
lon-3	WBGene00003057	protein_coding	ZK836.1	0.0206333	0.965279
lov-1	WBGene00003058	protein_coding	ZK945.9	-0.44727	NA
lpd-2	WBGene00003059	protein_coding	C48E7.3	-0.026706	0.957917
lpd-3	WBGene00003060	protein_coding	Y47G6A.23	0.0821706	0.755621
lpd-5	WBGene00003061	protein_coding	ZK973.10	0.00826902	0.987795
lpd-6	WBGene00003062	protein_coding	K09H9.6	-0.254908	0.472522
lpd-7	WBGene00003063	protein_coding	R13A5.12	0.0945656	0.586518
lpd-8	WBGene00003064	protein_coding	R10H10.1	0.0602273	0.817286
lpd-9	WBGene00003065	protein_coding	T21C9.5	-0.0671906	0.788662
lpl-1	WBGene00003066	protein_coding	ZC410.7	-0.0372771	0.877184
lrk-1	WBGene00003068	protein_coding	T27C10.6	-0.00529643	0.982134
lrp-1	WBGene00003071	protein_coding	F29D11.1	-0.129059	0.536356
lrp-2	WBGene00003072	protein_coding	T21E3.3	0.179099	0.297406
lars-1	WBGene00003073	protein_coding	R74.1	0.417585	0.00646375
lars-2	WBGene00003074	protein_coding	ZK524.3	0.364743	0.117681
lrx-1	WBGene00003075	protein_coding	T04H1.6	0.0252467	NA
lsm-1	WBGene00003076	protein_coding	F40F8.9	-0.27373	0.422255
lsm-3	WBGene00003077	protein_coding	Y62E10A.12	-0.287388	0.149066
lsm-4	WBGene00003078	protein_coding	F32A5.7	0.0643273	0.865442
lsm-5	WBGene00003079	protein_coding	F28F8.3	0.317912	0.218144
lsm-6	WBGene00003080	protein_coding	Y71G12B.14	-0.0894767	0.759398
lsm-7	WBGene00003081	protein_coding	ZK593.7	-0.235307	0.305965
lsm-8	WBGene00003082	protein_coding	Y73B6BL.32	0.318036	0.190262
lst-1	WBGene00003083	protein_coding	T22A3.3	1.08387	0.00227215
lst-2	WBGene00003084	protein_coding	R160.7	-0.149889	0.369086
lst-3	WBGene00003085	protein_coding	Y37A1B.1	-0.126438	0.631419
lst-4	WBGene00003086	protein_coding	Y37A1B.2	-0.137244	0.579072
lsy-2	WBGene00003087	protein_coding	F49H12.1	0.265344	0.210766
ltd-1	WBGene00003089	protein_coding	K02C4.4	-0.724426	4.01013e-05
lys-1	WBGene00003090	protein_coding	Y22F5A.4	-0.144903	0.669551
lys-2	WBGene00003091	protein_coding	Y22F5A.5	-0.664337	0.0805676
lys-3	WBGene00003092	protein_coding	Y22F5A.6	0.430275	0.250649
lys-4	WBGene00003093	protein_coding	F58B3.1	0.872339	0.0122631
lys-5	WBGene00003094	protein_coding	F58B3.2	0.86801	0.0438138
lys-6	WBGene00003095	protein_coding	F58B3.3	0.264626	0.618977
lys-7	WBGene00003096	protein_coding	C02A12.4	-0.0810665	0.890003
lys-8	WBGene00003097	protein_coding	C17G10.5	0.360726	0.334731
lys-9	WBGene00003098	protein_coding	C54C8.6	0.0487919	NA
lys-10	WBGene00003099	protein_coding	F17E9.11	0.168839	NA
mab-3	WBGene00003100	protein_coding	Y53C12B.5	0.437397	NA
mab-5	WBGene00003102	protein_coding	C08C3.3	0.153799	0.662938
mab-7	WBGene00003104	protein_coding	ZC13.4	0.265949	0.6215
mab-9	WBGene00003106	protein_coding	T27A1.6	-0.124601	0.742359
mab-10	WBGene00003107	protein_coding	R166.1	-0.242399	NA
mab-20	WBGene00003111	protein_coding	Y71G12B.20	-0.270958	0.279692
mab-21	WBGene00003112	protein_coding	F35G12.6	-0.122556	0.655739
mab-23	WBGene00003114	protein_coding	C32C4.5	0.621343	NA
mac-1	WBGene00003119	protein_coding	Y48C3A.7	0.0587827	0.78385
mag-1	WBGene00003123	protein_coding	R09B3.5	0.0934924	0.716391
mai-1	WBGene00003124	protein_coding	K10B3.9	-0.277718	0.451863
map-1	WBGene00003129	protein_coding	Y37E11AL.7	0.201596	0.399476
map-2	WBGene00003130	protein_coding	Y116A8A.9	0.0252473	0.927447
mat-1	WBGene00003132	protein_coding	Y110A7A.17	0.0516975	0.833169
mat-2	WBGene00003133	protein_coding	W10C6.1	0.551933	0.0330784
mat-3	WBGene00003134	protein_coding	F10C5.1	0.427436	0.121952
mau-2	WBGene00003136	protein_coding	C09H6.3	-0.0120147	0.974062
mau-8	WBGene00003142	protein_coding	Y62E10A.8	-0.0129445	0.971476
max-1	WBGene00003143	protein_coding	C34B4.1	-0.346166	0.0436354
max-2	WBGene00003144	protein_coding	Y38F1A.10	0.112784	0.550749
mbf-1	WBGene00003148	protein_coding	H21P03.1	-0.582303	0.00232004
mbk-1	WBGene00003149	protein_coding	T04C10.1	-0.0721054	0.806787
mbk-2	WBGene00003150	protein_coding	F49E11.1	-0.048984	0.865245
mca-1	WBGene00003151	protein_coding	W09C2.3	0.64	0.0555588
mca-3	WBGene00003153	protein_coding	Y67D8C.10	-0.122671	0.55885
mcm-2	WBGene00003154	protein_coding	Y17G7B.5	0.210184	0.669639
mcm-3	WBGene00003155	protein_coding	C25D7.6	0.193509	0.68523
mcm-4	WBGene00003156	protein_coding	Y39G10AR.14	0.209092	0.654134
mcm-5	WBGene00003157	protein_coding	R10E4.4	0.239464	0.605035
mcm-6	WBGene00003158	protein_coding	ZK632.1	0.171116	0.659894
mcm-7	WBGene00003159	protein_coding	F32D1.10	0.202776	0.729093
[truncated: 18,449 more rows]

## Sheet: DP degron 300mM vs 50mM Auxin
L1 mRNA-seq derived from P0 DP degron depeted (Auxin) mothers exposed to 300mM NaCl compared to 50mM NaCl
gene name	gene ID	type	cosmid	log2FC 300mM vs 50mM	FDR
aap-1	WBGene00000001	protein_coding	Y110A7A.10	0.328214	0.0264704
aat-1	WBGene00000002	protein_coding	F27C8.1	-0.542593	0.0143082
aat-2	WBGene00000003	protein_coding	F07C3.7	0.107688	0.644415
aat-3	WBGene00000004	protein_coding	F52H2.2	-0.27767	0.193551
aat-4	WBGene00000005	protein_coding	T13A10.10	0.313122	0.527611
aat-5	WBGene00000006	protein_coding	C55C2.5	-0.205562	0.444683
aat-6	WBGene00000007	protein_coding	T11F9.4	0.262895	0.510362
aat-7	WBGene00000008	protein_coding	F54D12.3	-0.540943	0.194545
aat-8	WBGene00000009	protein_coding	F28F9.4	0.165425	0.761408
aat-9	WBGene00000010	protein_coding	Y53H1C.1	0.471218	0.0218682
abf-1	WBGene00000012	protein_coding	C50F2.9	0.218165	0.688014
abf-2	WBGene00000013	protein_coding	C50F2.10	0.29071	0.560242
abf-3	WBGene00000014	protein_coding	F54B8.5	-0.0576657	NA
abf-4	WBGene00000015	protein_coding	Y38H6C.22	-0.852567	0.0344452
abf-5	WBGene00000016	protein_coding	T22H6.5	-0.628949	0.0607618
abf-6	WBGene00000017	protein_coding	T22H6.7	-0.556041	0.0852544
abl-1	WBGene00000018	protein_coding	M79.1	-0.0302379	0.884611
abt-1	WBGene00000019	protein_coding	C24F3.5	0.792851	0.0401639
abt-2	WBGene00000020	protein_coding	F12B6.1	0.0885315	0.752979
abt-4	WBGene00000022	protein_coding	Y39D8C.1	0.422685	0.137289
abt-5	WBGene00000023	protein_coding	Y53C10A.9	0.465202	0.285892
abu-1	WBGene00000024	protein_coding	AC3.3	-0.123659	0.703483
abu-2	WBGene00000025	protein_coding	F19G12.7	0.118237	0.767184
abu-3	WBGene00000026	protein_coding	F31A3.1	8.89256e-05	NA
abu-4	WBGene00000027	protein_coding	Y5H2A.3	-0.250796	0.609387
abu-5	WBGene00000028	protein_coding	Y105C5A.4	-0.182532	0.487852
abu-6	WBGene00000029	protein_coding	C03A7.7	0.0123611	NA
abu-7	WBGene00000030	protein_coding	C03A7.8	0.20259	0.444992
abu-8	WBGene00000031	protein_coding	C03A7.14	0.150668	0.767391
abu-9	WBGene00000032	protein_coding	R09F10.2	-0.283704	0.207044
abu-10	WBGene00000033	protein_coding	F35A5.3	-0.448736	0.284344
abu-11	WBGene00000034	protein_coding	T01D1.6	0.227666	0.645263
ace-1	WBGene00000035	protein_coding	W09B12.1	-0.249639	0.333273
ace-2	WBGene00000036	protein_coding	Y44E3A.2	-0.27419	0.0221794
ace-3	WBGene00000037	protein_coding	Y48B6A.8	0.119527	0.739884
ace-4	WBGene00000038	protein_coding	Y48B6A.7	0.21502	0.555639
acn-1	WBGene00000039	protein_coding	C42D8.5	-0.142875	0.737838
aco-1	WBGene00000040	protein_coding	ZK455.1	-0.303006	0.127643
aco-2	WBGene00000041	protein_coding	F54H12.1	0.00592699	0.989203
acr-2	WBGene00000042	protein_coding	K11G12.2	-0.322535	0.242608
acr-3	WBGene00000043	protein_coding	K11G12.7	-0.318301	0.465281
acr-5	WBGene00000044	protein_coding	K03F8.2	-0.336777	0.17909
acr-6	WBGene00000045	protein_coding	ZK973.5	-0.12667	0.832205
acr-7	WBGene00000046	protein_coding	T09A5.3	-0.454268	0.0490772
acr-8	WBGene00000047	protein_coding	ZC504.2	0.259089	0.252367
acr-9	WBGene00000048	protein_coding	C40C9.2	0.265522	0.460932
acr-10	WBGene00000049	protein_coding	R02E12.8	0.187915	0.711787
acr-11	WBGene00000050	protein_coding	D2092.3	-0.28728	0.486134
acr-12	WBGene00000051	protein_coding	R01E6.4	-0.386302	0.124879
acr-14	WBGene00000053	protein_coding	T05C12.2	0.0699436	0.908827
acr-15	WBGene00000054	protein_coding	F25G6.4	-0.325621	0.36239
acr-16	WBGene00000055	protein_coding	F25G6.3	-0.327345	0.191234
acr-17	WBGene00000056	protein_coding	F53E10.2	-0.287976	0.481934
acr-18	WBGene00000057	protein_coding	F28F8.1	0.0883879	0.837122
acr-19	WBGene00000058	protein_coding	C31H5.3	-0.509339	0.0111253
acr-20	WBGene00000059	protein_coding	R06A4.10	-0.133029	0.751046
acr-21	WBGene00000060	protein_coding	F27B3.2	-0.352879	0.190509
lgc-11	WBGene00000061	protein_coding	F48E3.7	-0.511606	0.188923
acr-23	WBGene00000062	protein_coding	F59B1.9	-0.35922	0.162925
act-1	WBGene00000063	protein_coding	T04C12.6	-0.248795	0.516825
act-2	WBGene00000064	protein_coding	T04C12.5	-0.111509	0.799065
act-3	WBGene00000065	protein_coding	T04C12.4	-0.22274	0.553135
act-4	WBGene00000066	protein_coding	M03F4.2	0.00803167	0.992881
act-5	WBGene00000067	protein_coding	T25C8.2	-0.405644	0.116303
acy-1	WBGene00000068	protein_coding	F17C8.1	-0.439557	0.0190367
acy-2	WBGene00000069	protein_coding	C10F3.3	0.147586	0.553569
acy-3	WBGene00000070	protein_coding	C44F1.5	0.175632	0.342455
acy-4	WBGene00000071	protein_coding	T01C2.1	-0.205171	0.471923
add-1	WBGene00000072	protein_coding	F39C12.2	-0.405148	0.0142956
add-2	WBGene00000073	protein_coding	F57F5.4	0.172323	0.50651
adm-2	WBGene00000074	protein_coding	C04A11.4	0.260041	0.194788
adm-4	WBGene00000075	protein_coding	ZK154.7	-0.498576	0.00200617
adr-1	WBGene00000079	protein_coding	H15N14.1	0.402329	0.0176607
adr-2	WBGene00000080	protein_coding	T20H4.4	0.2277	0.241612
ads-1	WBGene00000081	protein_coding	Y50D7A.7	-0.0358909	0.920669
adt-1	WBGene00000082	protein_coding	C02B4.1	-0.39511	0.154697
adt-2	WBGene00000083	protein_coding	F08C6.1	0.129702	0.557218
aex-1	WBGene00000084	protein_coding	D2030.10	-0.0642876	0.86409
aex-2	WBGene00000085	protein_coding	T14B1.2	-0.46956	0.106857
aex-3	WBGene00000086	protein_coding	C02H7.3	-0.27491	0.137519
aex-5	WBGene00000088	protein_coding	F32A7.6	-0.442453	0.0253273
aex-6	WBGene00000089	protein_coding	Y87G2A.4	-0.459115	0.0223695
age-1	WBGene00000090	protein_coding	B0334.8	0.340148	0.0289273
ags-3	WBGene00000092	protein_coding	F32A6.4	-0.233092	0.208779
agt-1	WBGene00000093	protein_coding	Y62E10A.5	-0.0335878	0.937281
agt-2	WBGene00000094	protein_coding	F09E5.13	0.09972	0.761508
aha-1	WBGene00000095	protein_coding	C25A1.11	-0.148749	0.370817
ahr-1	WBGene00000096	protein_coding	C41G7.5	-0.555622	0.0125439
aip-1	WBGene00000097	protein_coding	F58E10.4	0.491802	0.0402508
air-1	WBGene00000098	protein_coding	K07C11.2	0.530282	0.0874397
air-2	WBGene00000099	protein_coding	B0207.4	1.13528	0.00300571
ajm-1	WBGene00000100	protein_coding	C25A11.4	-0.443012	0.0132689
aka-1	WBGene00000101	protein_coding	D1022.7	0.0819653	0.634203
akt-1	WBGene00000102	protein_coding	C12D8.10	-0.234806	0.165703
akt-2	WBGene00000103	protein_coding	F28H6.1	-0.254197	0.293165
alg-1	WBGene00000105	protein_coding	F48F7.1	-0.119667	0.626431
alg-2	WBGene00000106	protein_coding	T07D3.7	0.274764	0.204463
alh-1	WBGene00000107	protein_coding	F54D8.3	-0.126117	0.66845
alh-2	WBGene00000108	protein_coding	K04F1.15	0.362708	0.290506
alh-3	WBGene00000109	protein_coding	F36H1.6	0.0708374	0.747454
alh-4	WBGene00000110	protein_coding	T05H4.13	-0.187986	0.487221
alh-5	WBGene00000111	protein_coding	T08B1.3	-0.634436	0.00183286
alh-6	WBGene00000112	protein_coding	F56D12.1	-0.146814	0.564407
alh-7	WBGene00000113	protein_coding	F45H10.1	-0.0691315	0.711894
alh-8	WBGene00000114	protein_coding	F13D12.4	0.0981541	0.782977
alh-9	WBGene00000115	protein_coding	F01F1.6	-0.0742817	0.761255
alh-10	WBGene00000116	protein_coding	C54D1.4	0.197357	0.405718
alh-11	WBGene00000117	protein_coding	F42G9.5	0.424161	0.0512225
alh-12	WBGene00000118	protein_coding	Y69F12A.2	-0.470823	0.00060744
aly-1	WBGene00000120	protein_coding	C01F6.5	0.625342	0.0257624
aly-2	WBGene00000121	protein_coding	F23B2.6	1.3254	9.17e-05
aly-3	WBGene00000122	protein_coding	M18.7	0.0933879	0.55425
ama-1	WBGene00000123	protein_coding	F36A4.7	0.632108	0.00398783
amt-1	WBGene00000133	protein_coding	C05E11.4	1.28476	0.0004177
amt-2	WBGene00000134	protein_coding	F49E11.3	-0.474553	0.216696
amt-3	WBGene00000135	protein_coding	M195.3	-0.179082	0.619044
amt-4	WBGene00000136	protein_coding	C05E11.5	-0.415578	0.13892
amx-1	WBGene00000137	protein_coding	R13G10.2	-0.0290053	0.919773
amx-2	WBGene00000138	protein_coding	B0019.1	-0.133591	0.638006
amx-3	WBGene00000139	protein_coding	F25C8.2	-1.04008	1.71e-07
anc-1	WBGene00000140	protein_coding	ZK973.6	-0.168781	0.643586
aos-1	WBGene00000142	protein_coding	C08B6.9	0.516877	0.00294165
apc-2	WBGene00000143	protein_coding	K06H7.6	0.223596	0.372101
apc-10	WBGene00000144	protein_coding	F15H10.3	0.890993	0.0259292
apc-11	WBGene00000145	protein_coding	F35G12.9	0.188911	0.654967
ape-1	WBGene00000146	protein_coding	F46F3.4	0.0911175	0.57802
aph-1	WBGene00000147	protein_coding	VF36H2L.1	0.39812	0.0868196
aph-2	WBGene00000148	protein_coding	ZC434.6	0.318521	0.13892
apl-1	WBGene00000149	protein_coding	C42D8.8	-0.0111056	0.987609
apm-1	WBGene00000150	protein_coding	F55A12.7	0.0270533	0.898607
apn-1	WBGene00000151	protein_coding	T05H10.2	0.0325721	0.921491
app-1	WBGene00000155	protein_coding	W03G9.4	-0.042269	0.894373
2001-04-01	WBGene00000156	protein_coding	K04G2.8	-0.112516	0.573389
aps-2	WBGene00000157	protein_coding	F02E8.3	-0.356937	0.0788878
apg-1	WBGene00000158	protein_coding	Y105E8A.9	0.0115844	0.945272
aps-1	WBGene00000159	protein_coding	F29G9.3	0.213255	0.352667
apb-1	WBGene00000160	protein_coding	Y71H2B.10	-0.0415359	0.886057
apa-2	WBGene00000161	protein_coding	T20B5.1	-0.27082	0.1521
apd-3	WBGene00000162	protein_coding	W09G10.4	0.118069	0.524871
apb-3	WBGene00000163	protein_coding	R11A5.1	0.17488	0.242632
apm-3	WBGene00000164	protein_coding	F53H8.1	0.0220774	0.933451
aps-3	WBGene00000165	protein_coding	Y48G8AL.14	0.311636	0.250922
apt-9	WBGene00000166	protein_coding	W04G3.4	-0.354356	0.114988
apx-1	WBGene00000168	protein_coding	K08D9.3	1.03406	0.00276695
aqp-1	WBGene00000169	protein_coding	F32A5.5	-0.823668	3.01e-05
aqp-2	WBGene00000170	protein_coding	C01G6.1	-0.255305	0.232328
aqp-3	WBGene00000171	protein_coding	Y69E1A.7	0.269899	0.192654
aqp-4	WBGene00000172	protein_coding	F40F9.9	-0.0684725	0.857442
aqp-5	WBGene00000173	protein_coding	C35A5.1	-0.156122	0.786585
aqp-6	WBGene00000174	protein_coding	C32C4.2	0.263577	0.582571
aqp-7	WBGene00000175	protein_coding	M02F4.8	-0.0715223	0.803796
aqp-8	WBGene00000176	protein_coding	K02G10.7	-0.0976644	0.793922
aqp-9	WBGene00000177	protein_coding	K07A1.16	-0.387025	0.120488
aqp-10	WBGene00000178	protein_coding	ZK1321.3	-0.394743	0.0582042
aqp-11	WBGene00000179	protein_coding	ZK525.2	-0.274548	0.100878
arc-1	WBGene00000180	protein_coding	ZK1320.6	-0.280149	0.0547894
ard-1	WBGene00000181	protein_coding	F01G4.2	-0.0225363	0.930761
arf-1.2	WBGene00000182	protein_coding	B0336.2	-0.116448	0.371171
arf-3	WBGene00000183	protein_coding	F57H12.1	-0.0626397	0.622416
arf-6	WBGene00000184	protein_coding	Y116A8C.12	0.146988	0.459181
arg-1	WBGene00000185	protein_coding	F31A9.3	-0.210669	0.679014
ark-1	WBGene00000186	protein_coding	C01C7.1	0.0623948	0.775982
arl-1	WBGene00000187	protein_coding	F54C9.10	-0.0313089	0.917585
arl-3	WBGene00000188	protein_coding	F19H8.3	-0.146027	0.688975
arl-5	WBGene00000189	protein_coding	ZK632.8	0.272236	0.388254
arf-1.1	WBGene00000190	protein_coding	F45E4.1	0.210719	0.626183
arl-8	WBGene00000192	protein_coding	Y57G11C.13	0.0865629	0.659606
arl-6	WBGene00000193	protein_coding	C38D4.8	-0.363317	0.314989
arr-1	WBGene00000195	protein_coding	F53H8.2	-0.291751	0.0499695
aars-1	WBGene00000196	protein_coding	W02B12.6	-0.182147	0.418965
aars-2	WBGene00000197	protein_coding	F28H1.3	0.610964	0.00026266
art-1	WBGene00000198	protein_coding	C15F1.6	-0.319568	0.023978
arx-1	WBGene00000199	protein_coding	Y71F9AL.16	-0.0595496	0.69197
arx-2	WBGene00000200	protein_coding	K07C5.1	0.171538	0.247252
arx-3	WBGene00000201	protein_coding	Y79H2A.6	-0.0686918	0.587801
exos-4.2	WBGene00000202	protein_coding	Y6D11A.1	0.0136432	0.973584
arx-5	WBGene00000203	protein_coding	Y37D8A.1	0.144584	0.564475
arx-6	WBGene00000204	protein_coding	C35D10.16	0.0471593	0.868569
arx-7	WBGene00000205	protein_coding	M01B12.3	0.214824	0.407412
asb-1	WBGene00000206	protein_coding	F35G12.10	1.04007	0.00091615
asb-2	WBGene00000207	protein_coding	F02E8.1	-0.0289376	0.925903
asc-1	WBGene00000208	protein_coding	Y53F4B.15	-0.254049	0.252367
asg-1	WBGene00000209	protein_coding	K07A12.3	0.137891	0.434331
asg-2	WBGene00000210	protein_coding	C53B7.4	-0.359954	0.0139425
asm-1	WBGene00000211	protein_coding	B0252.2	-0.188135	0.475694
asm-2	WBGene00000212	protein_coding	ZK455.4	0.247277	0.595916
asm-3	WBGene00000213	protein_coding	W03G1.7	-1.05994	0.00658052
asp-1	WBGene00000214	protein_coding	Y39B6A.20	-0.034066	0.928782
asp-2	WBGene00000215	protein_coding	T18H9.2	-0.415709	0.0398413
asp-3	WBGene00000216	protein_coding	H22K11.1	-0.339298	0.16805
asp-4	WBGene00000217	protein_coding	R12H7.2	0.585575	0.0447139
asp-5	WBGene00000218	protein_coding	F21F8.3	-0.286177	0.313206
asp-6	WBGene00000219	protein_coding	F21F8.7	-0.212975	0.531679
atf-2	WBGene00000220	protein_coding	K08F8.2	0.277389	0.5914
atf-5	WBGene00000221	protein_coding	T04C10.4	-0.427835	0.00073994
atf-6	WBGene00000222	protein_coding	F45E6.2	-0.161516	0.338039
atf-7	WBGene00000223	protein_coding	C07G2.2	-0.286732	0.0188811
atgp-1	WBGene00000224	protein_coding	F26D10.9	-0.163118	0.470835
atgp-2	WBGene00000225	protein_coding	C38C6.2	-0.698237	0.00010462
atl-1	WBGene00000226	protein_coding	T06E4.3	0.554943	0.00565403
atm-1	WBGene00000227	protein_coding	Y48G1BL.2	0.299061	0.231905
atn-1	WBGene00000228	protein_coding	W04D2.1	-0.225752	0.393271
atp-2	WBGene00000229	protein_coding	C34E10.6	-0.0560818	0.832205
atp-3	WBGene00000230	protein_coding	F27C1.7	-0.171602	0.255648
atx-2	WBGene00000231	protein_coding	D2045.1	0.56182	0.00336688
avr-14	WBGene00000232	protein_coding	B0207.12	-0.214367	0.472878
avr-15	WBGene00000233	protein_coding	R11G10.1	-0.528158	0.0117983
baf-1	WBGene00000235	protein_coding	B0464.7	0.73787	0.00082115
bag-1	WBGene00000236	protein_coding	F57B10.11	0.670388	0.00462429
bam-2	WBGene00000237	protein_coding	Y71F9AR.1	-0.0184004	0.965322
bar-1	WBGene00000238	protein_coding	C54D1.6	0.0352985	0.892832
bas-1	WBGene00000239	protein_coding	C05D2.4	-0.235488	0.270935
pah-1	WBGene00000240	protein_coding	K08F8.4	-0.304278	0.289426
bbs-1	WBGene00000241	protein_coding	Y105E8A.5	-0.408665	0.236472
bbs-2	WBGene00000242	protein_coding	F20D12.3	-0.102669	0.823944
bbs-8	WBGene00000244	protein_coding	T25F10.5	-0.156372	0.698009
bca-1	WBGene00000245	protein_coding	T13C5.5	-0.418411	0.0601129
bcc-1	WBGene00000246	protein_coding	M7.3	0.180617	0.436087
bec-1	WBGene00000247	protein_coding	T19E7.3	0.418947	0.0827673
ben-1	WBGene00000248	protein_coding	C54C6.2	-0.676012	3.38e-05
bir-1	WBGene00000249	protein_coding	T27F2.3	0.198031	0.442352
bir-2	WBGene00000250	protein_coding	C50B8.2	1.06793	0.00585708
bli-1	WBGene00000251	protein_coding	C09G5.6	-0.396787	0.325152
bli-2	WBGene00000252	protein_coding	F59E12.12	-0.0947933	0.883097
bli-3	WBGene00000253	protein_coding	F56C11.1	0.280417	0.0484109
bli-4	WBGene00000254	protein_coding	K04F10.4	0.146275	0.277352
bli-5	WBGene00000255	protein_coding	F45G2.5	0.143693	0.800879
bli-6	WBGene00000256	protein_coding	Y73B6BL.34	0.552189	0.102659
bmk-1	WBGene00000257	protein_coding	F23B12.8	1.26249	0.00043983
bpl-1	WBGene00000259	protein_coding	F13H8.10	-0.234128	0.0725976
bra-1	WBGene00000262	protein_coding	F54B11.6	0.0276933	0.955171
F23H11.5	WBGene00000263	protein_coding	F23H11.5	-0.28771	0.013915
brc-1	WBGene00000264	protein_coding	C36A4.8	0.539887	0.0686221
brd-1	WBGene00000265	protein_coding	K04C2.4	1.07776	0.00253082
bre-1	WBGene00000266	protein_coding	C53B4.7	-0.106375	0.606749
bre-2	WBGene00000267	protein_coding	Y39E4B.9	-0.178344	0.567776
bre-3	WBGene00000268	protein_coding	B0464.4	-0.0550107	0.726507
bre-4	WBGene00000269	protein_coding	Y73E7A.7	-0.106424	0.644119
bre-5	WBGene00000270	protein_coding	T12G3.8	0.249146	0.385959
brf-1	WBGene00000271	protein_coding	F45E12.2	0.211344	0.132827
bro-1	WBGene00000272	protein_coding	F56A3.5	0.239415	0.652364
brp-1	WBGene00000273	protein_coding	Y79H2A.1	0.0237233	0.947295
btf-1	WBGene00000274	protein_coding	F15D4.1	0.330803	0.0585264
bub-1	WBGene00000275	protein_coding	R06C7.8	1.25843	7.66e-05
byn-1	WBGene00000276	protein_coding	F57B9.5	-0.0344141	0.87842
cab-1	WBGene00000277	protein_coding	C23H4.1	-0.36895	0.117223
cah-1	WBGene00000279	protein_coding	F54D8.4	-0.114648	0.749618
cah-2	WBGene00000280	protein_coding	D1022.8	-0.401202	0.147531
cah-3	WBGene00000281	protein_coding	K05G3.3	-0.547818	0.00027957
cah-4	WBGene00000282	protein_coding	R01E6.3	-0.578922	0.0207346
cah-5	WBGene00000283	protein_coding	R173.1	-0.0114977	0.980998
cah-6	WBGene00000284	protein_coding	T28F2.3	-0.384862	0.240666
cal-1	WBGene00000285	protein_coding	C13C12.1	-0.0659336	0.825289
cal-2	WBGene00000286	protein_coding	C18E9.1	-0.25689	0.217474
cal-3	WBGene00000287	protein_coding	M02B7.6	-0.639719	0.0205758
cal-4	WBGene00000288	protein_coding	T07G12.1	-0.264752	0.237911
cam-1	WBGene00000289	protein_coding	C01G6.8	0.095297	0.652364
cap-1	WBGene00000292	protein_coding	D2024.6	-0.101277	0.433072
cap-2	WBGene00000293	protein_coding	M106.5	-0.00102698	0.9971
cas-1	WBGene00000294	protein_coding	F41G4.2	0.326377	0.277352
cat-1	WBGene00000295	protein_coding	W01C8.6	-0.117131	0.826385
cat-2	WBGene00000296	protein_coding	B0432.5	-0.472849	0.203439
cat-4	WBGene00000298	protein_coding	F32G8.6	-0.720221	0.00014181
cav-1	WBGene00000301	protein_coding	T13F2.8	-0.318244	0.239755
cav-2	WBGene00000302	protein_coding	C56A3.7	-0.350496	0.0889053
cbp-1	WBGene00000366	protein_coding	R10E11.1	0.112511	0.541773
cca-1	WBGene00000367	protein_coding	C54D2.5	-0.246266	0.307211
ccb-1	WBGene00000368	protein_coding	T28F2.5	-0.369234	0.0453576
ccf-1	WBGene00000369	protein_coding	Y56A3A.20	0.0755469	0.733464
ccg-1	WBGene00000370	protein_coding	Y73F8A.6	-0.141961	0.157263
cco-1	WBGene00000371	protein_coding	F26E4.9	-0.286645	0.0195798
cyp-13A7	WBGene00000372	protein_coding	T10B9.10	0.0599694	0.922973
cyp-14A5	WBGene00000373	protein_coding	F08F3.7	1.42565	2.88e-15
cyp-44A1	WBGene00000375	protein_coding	ZK177.5	0.180704	0.560679
ccr-4	WBGene00000376	protein_coding	ZC518.3	0.168574	0.408111
cct-1	WBGene00000377	protein_coding	T05C12.7	0.0184978	0.93989
cct-2	WBGene00000378	protein_coding	T21B10.7	0.155724	0.433736
cct-4	WBGene00000379	protein_coding	K01C8.10	0.310734	0.0238988
cct-5	WBGene00000380	protein_coding	C07G2.3	0.163613	0.251867
cct-6	WBGene00000381	protein_coding	F01F1.8	0.152326	0.472166
cdc-6	WBGene00000382	protein_coding	C43E11.10	0.745397	0.00334552
cdc-14	WBGene00000383	protein_coding	C17G10.4	-0.0285475	0.899522
cdc-25.1	WBGene00000386	protein_coding	K06A5.7	1.15531	0.00045137
cdc-25.2	WBGene00000387	protein_coding	F16B4.8	0.664591	0.0091119
cdc-25.3	WBGene00000388	protein_coding	ZK637.11	1.21036	4.62e-05
cdc-25.4	WBGene00000389	protein_coding	R05H5.2	0.0729809	NA
cdc-42	WBGene00000390	protein_coding	R07G3.1	0.132531	0.278589
cdd-1	WBGene00000391	protein_coding	C47D2.2	0.083527	0.785031
cdd-2	WBGene00000392	protein_coding	F49E8.4	0.479352	0.193551
cdf-1	WBGene00000393	protein_coding	C15B12.7	-0.299496	0.12849
cdh-3	WBGene00000395	protein_coding	ZK112.7	-0.368068	0.223283
cdh-4	WBGene00000396	protein_coding	F25F2.2	0.0390268	0.87543
cdh-5	WBGene00000397	protein_coding	F08B4.2	1.31098	0.00028819
cdh-7	WBGene00000399	protein_coding	R05H10.6	0.0547727	0.923915
cdh-9	WBGene00000401	protein_coding	F59C12.1	-0.498595	0.0865884
cdh-10	WBGene00000402	protein_coding	C45G7.5	-0.107074	0.794743
casy-1	WBGene00000403	protein_coding	B0034.3	-0.404518	0.126348
cdk-1	WBGene00000405	protein_coding	T05G5.3	1.01421	0.00983771
cdk-4	WBGene00000406	protein_coding	F18H3.5	-0.276929	0.226785
cdk-5	WBGene00000407	protein_coding	T27E9.3	-0.269495	0.0323817
cdk-7	WBGene00000408	protein_coding	Y39G10AL.3	0.399654	0.0471092
cdk-8	WBGene00000409	protein_coding	F39H11.3	0.196288	0.326941
cdk-9	WBGene00000410	protein_coding	H25P06.2	0.0171582	0.940106
cdl-1	WBGene00000411	protein_coding	R06F6.1	0.919849	0.00547317
cdr-1	WBGene00000412	protein_coding	F35E8.11	-0.196507	0.670569
cdt-1	WBGene00000413	protein_coding	Y54E10A.15	1.11233	0.00054714
cec-1	WBGene00000414	protein_coding	ZK1236.2	-0.325042	0.0268648
ced-1	WBGene00000415	protein_coding	Y47H9C.4	0.336186	0.0228058
ced-2	WBGene00000416	protein_coding	Y41D4B.13	0.351664	0.149614
ced-3	WBGene00000417	protein_coding	C48D1.2	1.23445	0.00031872
ced-4	WBGene00000418	protein_coding	C35D10.9	0.208215	0.305765
ced-5	WBGene00000419	protein_coding	C02F4.1	0.153856	0.282796
ced-6	WBGene00000420	protein_coding	F56D2.7	0.0636441	0.802606
ced-7	WBGene00000421	protein_coding	C48B4.4	0.25651	0.0920249
ced-8	WBGene00000422	protein_coding	F08F1.5	0.128603	0.829684
ced-9	WBGene00000423	protein_coding	T07C4.8	0.0624503	0.823944
ced-10	WBGene00000424	protein_coding	C09G12.8	-0.032051	0.879389
ced-11	WBGene00000425	protein_coding	ZK512.3	-0.224192	0.50651
ced-12	WBGene00000426	protein_coding	Y106G6E.5	0.344708	0.00482824
ced-13	WBGene00000427	protein_coding	R09F10.9	-0.0629169	0.87842
ceh-1	WBGene00000428	protein_coding	F16H11.4	-0.30595	0.543777
ceh-2	WBGene00000429	protein_coding	C27A12.5	-0.43068	0.25487
ceh-5	WBGene00000430	protein_coding	C16C2.1	0.476961	0.290905
ceh-6	WBGene00000431	protein_coding	K02B12.1	-0.587484	0.00544295
ceh-7	WBGene00000432	protein_coding	C34C6.8	-0.0821135	0.866485
ceh-8	WBGene00000433	protein_coding	ZK265.4	0.0700547	0.874905
ceh-9	WBGene00000434	protein_coding	Y65B4BR.9	-0.638577	0.128422
ceh-10	WBGene00000435	protein_coding	W03A3.1	0.153863	0.675022
ceh-12	WBGene00000436	protein_coding	F33D11.4	0.0100833	0.990135
ceh-13	WBGene00000437	protein_coding	R13A5.5	0.313506	0.282204
ceh-14	WBGene00000438	protein_coding	F46C8.5	-0.626048	0.00504318
ceh-16	WBGene00000439	protein_coding	C13G5.1	-0.114524	0.726507
ceh-17	WBGene00000440	protein_coding	D1007.1	-0.091343	0.857785
ceh-18	WBGene00000441	protein_coding	ZC64.3	-0.201567	0.253608
ceh-19	WBGene00000442	protein_coding	F20D12.6	-0.206132	0.571137
ceh-20	WBGene00000443	protein_coding	F31E3.1	-0.0214862	0.906535
ceh-21	WBGene00000444	protein_coding	T26C11.6	0.136247	0.655984
ceh-22	WBGene00000445	protein_coding	F29F11.5	-0.173017	0.686212
ceh-23	WBGene00000446	protein_coding	ZK652.5	-0.710043	0.0280617
ceh-24	WBGene00000447	protein_coding	F55B12.1	-0.23023	0.593112
pros-1	WBGene00000448	protein_coding	K12H4.1	-0.38247	0.0509029
ceh-27	WBGene00000449	protein_coding	F46F3.1	-0.58715	0.0320662
ceh-28	WBGene00000450	protein_coding	K03A11.3	0.10064	0.808243
ceh-30	WBGene00000451	protein_coding	C33D12.7	-0.0372352	0.94412
ceh-31	WBGene00000452	protein_coding	C33D12.1	-0.408762	0.167489
ceh-32	WBGene00000453	protein_coding	W05E10.3	-0.671858	0.00774284
ceh-33	WBGene00000454	protein_coding	C10G8.7	-0.397102	0.276557
ceh-34	WBGene00000455	protein_coding	C10G8.6	-0.524557	0.114597
ceh-36	WBGene00000457	protein_coding	C37E2.4	-0.0892115	0.875582
ceh-37	WBGene00000458	protein_coding	C37E2.5	0.32039	0.384787
ceh-38	WBGene00000459	protein_coding	F22D3.1	0.00870429	0.975231
ceh-39	WBGene00000460	protein_coding	T26C11.7	0.409969	0.142201
ceh-40	WBGene00000461	protein_coding	F17A2.5	0.610782	0.159542
ceh-41	WBGene00000462	protein_coding	T26C11.5	0.176842	0.50651
ceh-43	WBGene00000463	protein_coding	C28A5.4	-0.6	0.0150543
ceh-44	WBGene00000464	protein_coding	Y54F10AM.4	-0.178682	0.37928
cpg-1	WBGene00000465	protein_coding	C07G2.1	1.64363	1.73e-06
cel-1	WBGene00000466	protein_coding	C03D6.3	0.286068	0.179562
cep-1	WBGene00000467	protein_coding	F52B5.5	0.712516	0.0249782
ces-1	WBGene00000468	protein_coding	F43G9.11	0.199539	0.717691
ces-2	WBGene00000469	protein_coding	ZK909.4	-0.180144	0.718945
cey-1	WBGene00000472	protein_coding	F33A8.3	-0.011486	0.968528
cey-2	WBGene00000473	protein_coding	F46F11.2	1.65424	1.24e-06
cey-3	WBGene00000474	protein_coding	M01E11.5	1.49712	2.01e-05
cey-4	WBGene00000475	protein_coding	Y39A1C.3	0.392265	0.126649
cfi-1	WBGene00000476	protein_coding	T23D8.8	-0.571656	0.00818481
cft-1	WBGene00000477	protein_coding	C18C4.2	0.469019	0.186804
cfz-2	WBGene00000478	protein_coding	F27E11.3	-0.206527	0.545597
cgh-1	WBGene00000479	protein_coding	C07H6.5	0.814301	0.00276695
cgp-1	WBGene00000480	protein_coding	Y38C9A.2	0.550224	0.00180614
cha-1	WBGene00000481	protein_coding	ZC416.8	-0.18568	0.594916
chd-3	WBGene00000482	protein_coding	T14G8.1	-0.0221415	0.932432
che-1	WBGene00000483	protein_coding	C55B7.12	-0.478794	0.297101
che-2	WBGene00000484	protein_coding	F38G1.1	-0.0295959	0.955825
che-3	WBGene00000485	protein_coding	F18C12.1	-0.0143336	0.976217
che-6	WBGene00000487	protein_coding	C23H5.7	0.105987	0.841055
che-7	WBGene00000488	protein_coding	F26D11.10	-0.23686	0.370338
che-11	WBGene00000490	protein_coding	C27A7.4	-0.0887775	0.837948
che-12	WBGene00000491	protein_coding	B0024.8	0.00319814	0.99582
che-13	WBGene00000492	protein_coding	F59C6.7	-0.593699	0.0399154
che-14	WBGene00000493	protein_coding	F56H1.1	0.146657	0.740484
chs-1	WBGene00000496	protein_coding	T25G3.2	1.30726	0.00049418
chs-2	WBGene00000497	protein_coding	F48A11.1	0.808811	0.0150543
chk-1	WBGene00000498	protein_coding	Y39H10A.7	0.847324	0.00314937
chk-2	WBGene00000499	protein_coding	Y60A3A.12	0.33256	0.186888
chn-1	WBGene00000500	protein_coding	T09B4.10	0.00886706	0.975254
cho-1	WBGene00000501	protein_coding	C48D1.3	-0.307942	0.33435
chp-1	WBGene00000502	protein_coding	Y110A7A.13	0.24634	0.193571
cht-1	WBGene00000503	protein_coding	C04F6.3	0.6151	0.146355
cic-1	WBGene00000506	protein_coding	H14E04.5	0.162267	0.50651
cit-1.1	WBGene00000507	protein_coding	F44B9.4	0.254445	0.267447
cit-1.2	WBGene00000508	protein_coding	F44B9.3	0.188976	0.354239
cka-1	WBGene00000509	protein_coding	C28D4.2	-0.328779	0.00691905
cka-2	WBGene00000510	protein_coding	C52B9.1	-0.182475	0.330919
ckb-1	WBGene00000511	protein_coding	B0285.8	-0.153617	0.580206
ckb-2	WBGene00000512	protein_coding	B0285.9	-0.45232	0.00853222
ckb-3	WBGene00000513	protein_coding	B0285.10	0.410562	0.388048
ckb-4	WBGene00000514	protein_coding	F22F7.5	-0.282385	0.204157
ckc-1	WBGene00000515	protein_coding	T27A10.3	-0.565644	0.00245861
cki-1	WBGene00000516	protein_coding	T05A6.1	-0.150533	0.288571
cki-2	WBGene00000517	protein_coding	T05A6.2	0.131134	0.530782
ckk-1	WBGene00000518	protein_coding	C05H8.1	-0.410967	0.00502447
cku-70	WBGene00000519	protein_coding	Y47D3A.4	0.44636	0.033771
cku-80	WBGene00000520	protein_coding	R07E5.8	0.712335	0.00183055
cky-1	WBGene00000521	protein_coding	C15C8.2	0.0985364	0.868856
clc-1	WBGene00000522	protein_coding	C09F12.1	0.603416	0.00481325
clc-2	WBGene00000523	protein_coding	C01C10.1	-0.184662	0.550192
clc-3	WBGene00000524	protein_coding	ZK563.4	-0.562892	0.0166778
clc-4	WBGene00000525	protein_coding	T05A10.2	-0.338575	0.452883
clc-5	WBGene00000526	protein_coding	C01C10.4	-0.392272	0.061679
cle-1	WBGene00000527	protein_coding	C36B1.1	-0.135109	0.392465
clh-1	WBGene00000528	protein_coding	T27D12.2	-0.0594133	0.838273
clh-2	WBGene00000529	protein_coding	B0491.8	-0.36435	0.136067
clh-3	WBGene00000530	protein_coding	E04F6.11	-0.358867	0.119371
clh-4	WBGene00000531	protein_coding	T06F4.2	0.928734	0.00886379
clh-5	WBGene00000532	protein_coding	C07H4.2	0.0399041	0.834822
clh-6	WBGene00000533	protein_coding	R07B7.1	0.0832915	0.692143
cpi-2	WBGene00000534	protein_coding	R01B10.1	-0.0469478	0.813658
cpi-1	WBGene00000535	protein_coding	K08B4.6	0.656429	0.0338163
clk-1	WBGene00000536	protein_coding	ZC395.2	-0.0564015	0.846515
clk-2	WBGene00000537	protein_coding	C07H6.6	0.382722	0.0638136
cln-3.1	WBGene00000539	protein_coding	F07B10.1	-0.0535978	0.925294
cln-3.2	WBGene00000540	protein_coding	C01G8.2	-0.185495	0.385162
cln-3.3	WBGene00000541	protein_coding	ZC190.1	-0.00791004	0.991422
clp-1	WBGene00000542	protein_coding	C06G4.2	-0.239674	0.189072
clp-2	WBGene00000543	protein_coding	T04A8.16	0.18423	0.446624
clp-3	WBGene00000544	protein_coding	Y47H10A.1	0.565991	0.198356
clp-4	WBGene00000545	protein_coding	Y39A3CL.5	-0.101997	0.616789
clp-6	WBGene00000546	protein_coding	Y77E11A.10	0.567733	0.1909
clp-7	WBGene00000547	protein_coding	Y77E11A.11	0.223794	0.200287
clr-1	WBGene00000548	protein_coding	F56D1.4	0.136152	0.218034
cls-2	WBGene00000549	protein_coding	R107.6	0.825917	0.00071814
clu-1	WBGene00000550	protein_coding	F55H2.6	-0.242614	0.186733
clx-1	WBGene00000551	protein_coding	C50F7.2	0.258116	0.592389
cmd-1	WBGene00000552	protein_coding	T21H3.3	-0.249778	0.323861
cmk-1	WBGene00000553	protein_coding	K07A9.2	-0.235093	0.37671
cnb-1	WBGene00000554	protein_coding	F55C10.1	-0.538782	0.00012898
cnc-1	WBGene00000555	protein_coding	R09B5.2	0	NA
cnc-2	WBGene00000556	protein_coding	R09B5.3	0.450069	0.208969
cnc-3	WBGene00000557	protein_coding	R09B5.8	0.573709	0.114797
cnc-4	WBGene00000558	protein_coding	R09B5.9	0.599194	0.166671
cnc-5	WBGene00000559	protein_coding	R09B5.10	NA	NA
cnc-6	WBGene00000560	protein_coding	Y46E12A.1	1.19173	0.00155021
cnd-1	WBGene00000561	protein_coding	C34E10.7	0.0192448	0.979856
cng-1	WBGene00000562	protein_coding	F14H8.6	0.466293	0.208731
cng-3	WBGene00000563	protein_coding	F38E11.12	-0.627076	0.024964
cnk-1	WBGene00000564	protein_coding	R01H10.8	-0.0485512	0.859535
cnt-1	WBGene00000565	protein_coding	Y17G7B.15	0.0800177	0.681047
cnt-2	WBGene00000566	protein_coding	Y39A1A.15	-0.0306127	0.920669
cnx-1	WBGene00000567	protein_coding	ZK632.6	0.304409	0.0034693
cof-2	WBGene00000583	protein_coding	C48E7.5	0.622672	0.112263
cog-1	WBGene00000584	protein_coding	R03C1.3	-0.222933	0.326139
cogc-2	WBGene00000585	protein_coding	C06G3.10	0.320037	0.10478
coh-1	WBGene00000591	protein_coding	K08A8.3	0.0378718	0.895934
coh-3	WBGene00000592	protein_coding	F08H9.1	0.85359	0.0352426
col-2	WBGene00000593	protein_coding	W01B6.7	0.152116	0.515997
col-3	WBGene00000594	protein_coding	T28C6.6	0.189264	0.568881
col-7	WBGene00000596	protein_coding	C15A11.5	0.0349233	0.956211
col-8	WBGene00000597	protein_coding	F11H8.3	1.26387	0.00030422
col-9	WBGene00000598	protein_coding	F54B11.1	0.15888	0.621287
col-10	WBGene00000599	protein_coding	B0222.8	0.242495	0.420085
col-12	WBGene00000601	protein_coding	F15H10.1	-0.0451983	0.924001
col-13	WBGene00000602	protein_coding	F15H10.2	-0.0568295	0.90676
col-14	WBGene00000603	protein_coding	C46A5.3	1.58295	1.07e-05
col-17	WBGene00000606	protein_coding	F11G11.10	0.0419966	0.681258
col-19	WBGene00000608	protein_coding	ZK1193.1	1.57047	7.15e-10
col-20	WBGene00000609	protein_coding	F11G11.11	0.696678	0.0001156
col-33	WBGene00000610	protein_coding	F36A4.6	0.072303	NA
col-34	WBGene00000611	protein_coding	F36A4.10	-0.226505	0.482102
col-35	WBGene00000612	protein_coding	C15A11.1	0.462642	0.308664
col-36	WBGene00000613	protein_coding	C27H5.5	0.0545749	0.918018
col-37	WBGene00000614	protein_coding	ZK863.2	0.0533703	0.887468
col-38	WBGene00000615	protein_coding	F54C9.4	1.26712	0.00038073
col-39	WBGene00000616	protein_coding	C09G5.4	-0.117759	0.679358
col-40	WBGene00000617	protein_coding	T13B5.4	0	NA
col-41	WBGene00000618	protein_coding	T10B10.1	-0.469407	0.295731
col-43	WBGene00000620	protein_coding	ZC513.8	0.000237171	NA
col-44	WBGene00000621	protein_coding	F54B11.2	0.990243	0.0108728
col-45	WBGene00000622	protein_coding	F53G12.7	0.610551	0.152762
col-46	WBGene00000623	protein_coding	Y18H1A.13	-0.0926294	0.838784
col-47	WBGene00000624	protein_coding	Y18H1A.12	0.252625	0.604807
col-48	WBGene00000625	protein_coding	Y54E10BL.2	0.355821	0.37882
col-49	WBGene00000626	protein_coding	K09H9.3	0.00940791	0.993182
col-50	WBGene00000627	protein_coding	T28F2.6	0.292134	0.316004
col-51	WBGene00000628	protein_coding	T28F2.8	-0.0177439	0.981537
col-52	WBGene00000629	protein_coding	D1007.2	-0.194442	0.725345
col-53	WBGene00000630	protein_coding	M01A12.1	-0.526069	0.108994
col-54	WBGene00000631	protein_coding	F33D11.3	0.236102	0.583444
col-55	WBGene00000632	protein_coding	T05E7.2	0.298714	0.325059
col-56	WBGene00000633	protein_coding	T08B2.2	0.0447852	0.914891
col-58	WBGene00000634	protein_coding	F26B1.4	0.439762	0.333488
col-60	WBGene00000636	protein_coding	F22D6.10	0.10706	0.862138
col-61	WBGene00000637	protein_coding	C01H6.1	-0.21927	0.668458
col-62	WBGene00000638	protein_coding	C15A11.6	0.143319	0.802963
col-63	WBGene00000639	protein_coding	ZK265.2	0.491707	0.188862
col-64	WBGene00000640	protein_coding	F52F12.2	0.32196	0.495286
col-65	WBGene00000641	protein_coding	K08C9.4	0.563704	0.107535
col-68	WBGene00000644	protein_coding	C50D2.4	0.194419	0.721615
col-69	WBGene00000645	protein_coding	K01A2.7	-0.510333	0.232328
col-70	WBGene00000646	protein_coding	H17B01.2	0.0053678	0.99468
col-71	WBGene00000647	protein_coding	Y49F6B.10	0.619124	0.129736
col-72	WBGene00000648	protein_coding	W09G10.1	0.0354389	0.942816
col-73	WBGene00000649	protein_coding	F11G11.12	0.528415	0.0714001
col-74	WBGene00000650	protein_coding	ZK1248.2	0.250827	0.618445
col-75	WBGene00000651	protein_coding	K03H9.2	0.041034	0.902043
col-76	WBGene00000652	protein_coding	M110.1	0.311953	0.448001
col-77	WBGene00000653	protein_coding	M195.1	0.850502	0.0358484
col-78	WBGene00000654	protein_coding	W07A12.5	-0.138833	0.812795
col-79	WBGene00000655	protein_coding	C09G5.3	-0.742927	0.0346013
col-80	WBGene00000656	protein_coding	C09G5.5	0.47155	0.139002
col-81	WBGene00000657	protein_coding	F38A3.1	1.38882	0.00011294
col-83	WBGene00000658	protein_coding	F33A8.9	-0.0187869	0.980964
col-84	WBGene00000659	protein_coding	K12D12.3	0.0488915	0.938193
col-85	WBGene00000660	protein_coding	T21B4.2	-0.0641594	0.812815
col-86	WBGene00000661	protein_coding	Y81G3A.5	0.346679	0.480942
col-87	WBGene00000662	protein_coding	Y39G8C.4	-0.146332	0.802547
col-88	WBGene00000663	protein_coding	W05G11.3	0.155118	0.754812
col-89	WBGene00000664	protein_coding	F17C8.2	-0.561267	0.113551
col-90	WBGene00000665	protein_coding	C29E4.1	-0.0119563	0.982932
col-91	WBGene00000666	protein_coding	F09G8.6	0.426502	0.0357408
col-92	WBGene00000667	protein_coding	W05B2.6	0.203829	0.394179
col-93	WBGene00000668	protein_coding	W05B2.5	0.285313	0.211215
col-94	WBGene00000669	protein_coding	W05B2.1	0.208574	0.361615
col-95	WBGene00000670	protein_coding	Y41C4A.16	1.10558	0.00017125
col-96	WBGene00000671	protein_coding	Y41C4A.19	1.13622	0.00192841
col-97	WBGene00000672	protein_coding	ZK1010.7	1.50332	4.37e-05
col-98	WBGene00000673	protein_coding	F14F7.1	0.532815	0.214382
col-99	WBGene00000674	protein_coding	F29C4.8	0.24427	0.461293
col-101	WBGene00000675	protein_coding	K02D7.3	1.15826	0.00159555
col-102	WBGene00000676	protein_coding	C18H7.3	0.186469	0.504129
col-103	WBGene00000677	protein_coding	F56B3.1	0.710389	0.0756673
col-104	WBGene00000678	protein_coding	F58F6.1	0.581602	0.130136
col-105	WBGene00000679	protein_coding	F58F6.2	-0.502641	0.267273
col-106	WBGene00000680	protein_coding	Y77E11A.15	1.72186	2.96e-09
col-107	WBGene00000681	protein_coding	C34H4.4	0.0159523	0.974632
col-108	WBGene00000682	protein_coding	Y41D4A.2	2.80328	8.4e-17
col-109	WBGene00000683	protein_coding	Y38C1BA.3	0.963203	0.0153185
col-110	WBGene00000684	protein_coding	F19C7.7	-0.628629	0.0360723
col-111	WBGene00000685	protein_coding	F29B9.9	0.429745	0.263279
col-113	WBGene00000687	protein_coding	C34D4.15	-0.079697	0.890517
col-114	WBGene00000688	protein_coding	D2024.8	0.0725521	0.903085
col-115	WBGene00000689	protein_coding	Y42H9B.1	0.592544	0.175681
col-116	WBGene00000690	protein_coding	F17E9.1	0.00298221	0.995965
col-117	WBGene00000691	protein_coding	T28C6.4	0.183445	0.588806
col-118	WBGene00000692	protein_coding	T11B7.3	-0.652415	0.00737984
col-119	WBGene00000693	protein_coding	C53B4.5	1.35207	4.09e-05
col-120	WBGene00000694	protein_coding	Y11D7A.11	0.51996	0.248885
col-121	WBGene00000695	protein_coding	F56D5.1	-0.0980252	0.873083
col-122	WBGene00000696	protein_coding	T05A1.2	1.5499	6.04e-08
col-123	WBGene00000697	protein_coding	W08D2.6	0.23031	0.443055
col-124	WBGene00000698	protein_coding	C24F3.6	1.55353	1.14e-06
col-125	WBGene00000699	protein_coding	C29F4.1	-0.386195	0.301199
col-126	WBGene00000700	protein_coding	F54D1.2	0.692409	0.101412
col-127	WBGene00000701	protein_coding	F54D1.3	0.850519	0.0352426
col-128	WBGene00000702	protein_coding	F12F6.9	0.0250707	NA
col-129	WBGene00000703	protein_coding	M18.1	1.3062	0.00057186
col-130	WBGene00000704	protein_coding	F08G5.4	0.102579	0.822474
col-131	WBGene00000705	protein_coding	C39E9.3	0.058219	NA
col-132	WBGene00000706	protein_coding	C39E9.9	0.0456623	0.933865
col-133	WBGene00000707	protein_coding	F52B11.4	0.330501	0.389998
col-135	WBGene00000708	protein_coding	M199.5	0.463208	0.00144352
col-137	WBGene00000710	protein_coding	Y51H4A.9	0.313965	0.374886
col-138	WBGene00000711	protein_coding	C52D10.13	0.621949	0.0282853
col-139	WBGene00000712	protein_coding	F41F3.4	1.98204	4.35e-11
col-140	WBGene00000713	protein_coding	F26F12.1	1.08267	1.35e-06
col-141	WBGene00000714	protein_coding	T15B7.5	1.19946	0.00091375
col-142	WBGene00000715	protein_coding	T15B7.4	0.848088	0.0369805
col-143	WBGene00000716	protein_coding	T15B7.3	1.31382	1e-06
col-144	WBGene00000717	protein_coding	B0222.6	0.203473	0.501542
col-145	WBGene00000718	protein_coding	B0222.7	0.234322	0.463366
col-146	WBGene00000719	protein_coding	T06E4.6	0.440498	0.0291249
col-147	WBGene00000720	protein_coding	T06E4.4	0.325469	0.149393
col-148	WBGene00000721	protein_coding	C12D8.8	-0.0334149	0.945402
col-149	WBGene00000722	protein_coding	B0024.1	0.534204	0.232918
col-150	WBGene00000723	protein_coding	B0024.2	0.388865	0.296701
col-151	WBGene00000724	protein_coding	AC3.6	0.434387	0.295747
col-152	WBGene00000725	protein_coding	F32G8.5	-0.155233	0.779275
col-153	WBGene00000726	protein_coding	F17C11.3	-0.0400128	0.942639
col-154	WBGene00000727	protein_coding	F55C10.2	-0.569659	0.0521084
col-155	WBGene00000728	protein_coding	F55C10.3	-0.469668	0.0844149
col-156	WBGene00000729	protein_coding	F57B7.3	0.211026	0.53296
col-157	WBGene00000730	protein_coding	T11F9.9	0.188405	0.73346
col-158	WBGene00000731	protein_coding	D2023.7	0.0066677	0.993527
col-159	WBGene00000732	protein_coding	F57B1.3	0.735128	0.00126265
col-160	WBGene00000733	protein_coding	F57B1.4	0.47269	0.0614126
col-161	WBGene00000734	protein_coding	C50B6.4	-0.153518	0.765232
col-162	WBGene00000735	protein_coding	Y2H9A.3	0.236551	0.353755
col-163	WBGene00000736	protein_coding	F46B3.17	0.00849483	0.993424
col-164	WBGene00000737	protein_coding	T21D9.1	0.0467758	0.919005
col-165	WBGene00000738	protein_coding	F14H12.1	0.0324954	0.959566
col-166	WBGene00000739	protein_coding	T07H6.3	0.329478	0.208891
col-167	WBGene00000740	protein_coding	T10E10.2	0.324401	0.358019
col-168	WBGene00000741	protein_coding	T10E10.1	0.315861	0.357915
col-169	WBGene00000742	protein_coding	T10E10.5	0.101222	0.834001
col-170	WBGene00000743	protein_coding	T10E10.6	0.206554	0.603602
col-171	WBGene00000744	protein_coding	T10E10.7	0.259553	0.451748
col-172	WBGene00000745	protein_coding	F38B6.5	0.283233	0.564475
col-173	WBGene00000746	protein_coding	F41C6.5	0.315295	0.255782
col-174	WBGene00000747	protein_coding	F46C8.2	0.0320438	0.96015
col-175	WBGene00000748	protein_coding	C35B8.1	0.219999	0.60243
col-176	WBGene00000749	protein_coding	ZC373.7	1.05063	0.00637599
col-177	WBGene00000750	protein_coding	F59F3.2	-0.486075	0.153699
col-178	WBGene00000751	protein_coding	C34F6.2	1.76015	7.63e-11
col-179	WBGene00000752	protein_coding	C34F6.3	1.01899	1.03e-05
col-180	WBGene00000753	protein_coding	C44C10.1	0.328602	0.427444
col-181	WBGene00000754	protein_coding	W03G11.1	1.82192	4.32e-10
col-182	WBGene00000755	protein_coding	R09A8.4	0.164243	0.708611
col-183	WBGene00000756	protein_coding	F02D10.1	0.175441	0.440438
col-184	WBGene00000757	protein_coding	F15A2.1	1.4587	4.12e-08
col-185	WBGene00000758	protein_coding	H06A10.2	-0.429902	0.234714
col-186	WBGene00000759	protein_coding	E03G2.4	-0.404971	0.35601
col-187	WBGene00000760	protein_coding	C30F2.1	-0.188206	0.732869
coq-1	WBGene00000761	protein_coding	C24A11.9	-0.369855	0.00583617
coq-2	WBGene00000762	protein_coding	F57B9.4	-0.225383	0.239646
coq-3	WBGene00000763	protein_coding	Y57G11C.11	-0.0929792	0.610049
coq-4	WBGene00000764	protein_coding	T03F1.2	-0.233687	0.291346
coq-5	WBGene00000765	protein_coding	ZK652.9	0.235148	0.402285
coq-6	WBGene00000766	protein_coding	K07B1.2	-0.182549	0.222328
coq-8	WBGene00000767	protein_coding	C35D10.4	0.196053	0.329515
cor-1	WBGene00000768	protein_coding	R01H10.3	0.0640891	0.808096
cpb-1	WBGene00000770	protein_coding	C40H1.1	1.40641	0.00018408
cpb-2	WBGene00000771	protein_coding	C30B5.3	0.859405	0.0143786
cpb-3	WBGene00000772	protein_coding	B0414.5	1.66543	6.11e-06
cpf-1	WBGene00000773	protein_coding	F28C6.3	0.615609	0.0140535
cpf-2	WBGene00000774	protein_coding	F56A8.6	0.503629	0.00734653
cpin-1	WBGene00000775	protein_coding	F38E11.3	-0.051997	0.916579
cpl-1	WBGene00000776	protein_coding	T03E6.7	-0.166835	0.60243
cpn-1	WBGene00000777	protein_coding	F43G9.9	0.90611	0.00018568
cpn-2	WBGene00000778	protein_coding	D1069.2	0.176244	0.737863
cpn-3	WBGene00000779	protein_coding	F28H1.2	-0.0221167	0.949011
cpn-4	WBGene00000780	protein_coding	F49D11.8	0.0307302	0.953363
cpr-1	WBGene00000781	protein_coding	C52E4.1	-0.931604	0.0181046
cpr-2	WBGene00000782	protein_coding	F36D3.9	0.486152	0.194398
cpr-3	WBGene00000783	protein_coding	T10H4.12	1.76048	1.12e-32
cpr-4	WBGene00000784	protein_coding	F44C4.3	0.72509	0.0748996
cpr-5	WBGene00000785	protein_coding	W07B8.5	0.490131	0.275926
cpr-6	WBGene00000786	protein_coding	C25B8.3	-0.464919	0.11076
cps-6	WBGene00000787	protein_coding	C41D11.8	0.457229	0.0381048
cpz-1	WBGene00000788	protein_coding	F32B5.8	0.175626	0.624941
cpz-2	WBGene00000789	protein_coding	M04G12.2	-0.112417	0.73066
crb-1	WBGene00000792	protein_coding	F11C7.4	0.0464939	0.902693
crh-1	WBGene00000793	protein_coding	Y41C4A.4	-0.333593	0.0487395
crn-1	WBGene00000794	protein_coding	Y47G6A.8	0.975692	0.00310849
crn-2	WBGene00000795	protein_coding	CD4.2	0.316907	0.12559
crn-3	WBGene00000796	protein_coding	C14A4.4	0.0868505	0.704516
crn-4	WBGene00000797	protein_coding	AH9.2	0.974144	0.00775815
crn-5	WBGene00000798	protein_coding	C14A4.5	0.239316	0.392465
crn-6	WBGene00000799	protein_coding	K04H4.6	0.141097	0.717529
cars-1	WBGene00000800	protein_coding	Y23H5A.7	0.335514	0.046928
crt-1	WBGene00000802	protein_coding	Y38A10A.5	-0.304281	0.181109
csb-1	WBGene00000803	protein_coding	F53H4.1	0.0148388	0.966977
csc-1	WBGene00000804	protein_coding	Y48E1B.12	1.00743	0.0101642
csk-1	WBGene00000812	protein_coding	Y48G1C.2	0.260557	0.0498844
csn-1	WBGene00000813	protein_coding	Y59A8A.1	0.161541	0.405442
csn-2	WBGene00000814	protein_coding	B0025.2	0.266597	0.150681
csn-3	WBGene00000815	protein_coding	Y38C1AA.2	0.0556704	0.820663
csn-4	WBGene00000816	protein_coding	Y55F3AM.15	0.142283	0.470589
csn-5	WBGene00000817	protein_coding	B0547.1	0.276599	0.209435
csn-6	WBGene00000818	protein_coding	Y67H2A.6	0.0450817	0.851808
csp-1	WBGene00000819	protein_coding	Y48E1B.13	0.823892	0.0425676
csp-2	WBGene00000820	protein_coding	Y73B6BL.7	0.514186	0.0396826
csp-3	WBGene00000821	protein_coding	Y47H9C.6	0.0101911	0.989203
csq-1	WBGene00000822	protein_coding	F40E10.3	-0.140289	0.54436
ctb-1	WBGene00000829	protein_coding	MTCE.21	-0.541623	0.0127963
ctl-1	WBGene00000830	protein_coding	Y54G11A.6	0.717342	0.00550115
ctl-2	WBGene00000831	protein_coding	Y54G11A.5	0.0770981	0.848874
ctn-1	WBGene00000832	protein_coding	Y23H5A.5	-0.236868	0.295301
cts-1	WBGene00000833	protein_coding	T20G5.2	-0.2551	0.279787
cua-1	WBGene00000834	protein_coding	Y76A2A.2	0.1346	0.500929
cuc-1	WBGene00000835	protein_coding	ZK652.11	-0.251629	0.420811
cul-1	WBGene00000836	protein_coding	D2045.6	0.134967	0.339535
cul-2	WBGene00000837	protein_coding	ZK520.4	0.0736204	0.721062
cul-3	WBGene00000838	protein_coding	Y108G3AL.1	0.312335	0.135124
cul-4	WBGene00000839	protein_coding	F45E12.3	0.0917637	0.690912
cul-5	WBGene00000840	protein_coding	ZK856.1	0.191619	0.217828
cul-6	WBGene00000841	protein_coding	K08E7.7	0.544653	0.0702179
cup-2	WBGene00000843	protein_coding	F25D7.1	0.0627763	0.791456
cup-4	WBGene00000845	protein_coding	C02C2.3	0.505967	0.166226
cup-5	WBGene00000846	protein_coding	R13A5.1	0.0137267	0.960243
cut-1	WBGene00000851	protein_coding	C47G2.1	0.332246	0.173352
cut-6	WBGene00000853	protein_coding	M142.2	0.35956	0.463366
cux-7	WBGene00000854	protein_coding	C07H6.8	0.200982	0.411749
cwn-1	WBGene00000857	protein_coding	K10B4.6	-0.336577	0.19482
cwn-2	WBGene00000858	protein_coding	W01B6.1	0.312611	0.201199
cwp-1	WBGene00000859	protein_coding	C37H5.10	0.04177	NA
cwp-2	WBGene00000860	protein_coding	C37H5.11	0.00317652	0.99582
cwp-3	WBGene00000861	protein_coding	C37H5.4	0.196295	0.440864
cwp-4	WBGene00000862	protein_coding	K11D12.1	-0.392123	0.193521
cya-1	WBGene00000863	protein_coding	ZK507.6	0.667431	0.00650153
cya-2	WBGene00000864	protein_coding	F59H6.7	0.523446	0.218581
cyb-1	WBGene00000865	protein_coding	ZC168.4	1.42175	0.00014536
cyb-2.1	WBGene00000866	protein_coding	Y43E12A.1	1.5241	4.12e-05
cyb-2.2	WBGene00000867	protein_coding	H31G24.4	1.63956	8.1e-06
cyb-3	WBGene00000868	protein_coding	T06E6.2	1.38444	0.00014099
cyc-1	WBGene00000869	protein_coding	C54G4.8	-0.0646325	0.761867
cyd-1	WBGene00000870	protein_coding	Y38F1A.5	0.0539716	0.861091
cye-1	WBGene00000871	protein_coding	C37A2.4	1.05672	0.00224969
cyk-1	WBGene00000872	protein_coding	F11H8.4	0.426986	0.00715999
cyk-3	WBGene00000874	protein_coding	ZK328.1	0.1828	0.217358
cyk-4	WBGene00000875	protein_coding	K08E3.6	1.23669	0.00038073
cyl-1	WBGene00000876	protein_coding	C52E4.6	0.161362	0.49137
cyn-1	WBGene00000877	protein_coding	Y49A3A.5	-0.364808	0.0667742
cyn-2	WBGene00000878	protein_coding	ZK520.5	0.648885	0.106362
cyn-3	WBGene00000879	protein_coding	Y75B12B.5	-0.0793839	0.6068
cyn-4	WBGene00000880	protein_coding	F59E10.2	0.186476	0.386342
cyn-5	WBGene00000881	protein_coding	F31C3.1	0.0744432	0.734746
cyn-6	WBGene00000882	protein_coding	F42G9.2	-0.00877538	0.987609
cyn-7	WBGene00000883	protein_coding	Y75B12B.2	0.353649	0.0106818
cyn-8	WBGene00000884	protein_coding	D1009.2	0.262993	0.220971
cyn-9	WBGene00000885	protein_coding	T27D1.1	0.899494	0.0189335
cyn-10	WBGene00000886	protein_coding	B0252.4	0.564295	0.0543289
cyn-11	WBGene00000887	protein_coding	T01B7.4	0.328721	0.156868
cyn-12	WBGene00000888	protein_coding	C34D4.12	0.0922183	0.714558
cyn-13	WBGene00000889	protein_coding	Y116A8C.34	0.296777	0.105191
sig-7	WBGene00000890	protein_coding	F39H2.2	0.268057	0.221647
cyn-15	WBGene00000891	protein_coding	Y87G2A.6	0.556853	0.0218682
cyn-16	WBGene00000892	protein_coding	Y17G7B.9	-0.196075	0.352197
cyn-17	WBGene00000893	protein_coding	ZC250.1	-0.0428815	0.947253
dab-1	WBGene00000894	protein_coding	M110.5	0.198661	0.177345
dac-1	WBGene00000895	protein_coding	B0412.1	-0.218093	0.655837
dad-1	WBGene00000896	protein_coding	F57B10.10	0.301228	0.0785313
daf-1	WBGene00000897	protein_coding	F29C4.1	-0.343592	0.105736
daf-2	WBGene00000898	protein_coding	Y55D5A.5	-0.140381	0.48221
daf-3	WBGene00000899	protein_coding	F25E2.5	-0.501269	0.00045137
daf-4	WBGene00000900	protein_coding	C05D2.1	-0.23378	0.154697
daf-5	WBGene00000901	protein_coding	W01G7.1	0.229681	0.373367
daf-6	WBGene00000902	protein_coding	F31F6.5	-0.252666	0.532185
daf-7	WBGene00000903	protein_coding	B0412.2	-0.0537358	0.933486
daf-8	WBGene00000904	protein_coding	R05D11.1	-0.34667	0.0319349
daf-9	WBGene00000905	protein_coding	T13C5.1	-0.0297902	0.959772
daf-10	WBGene00000906	protein_coding	F23B2.4	0.0707912	0.884016
daf-11	WBGene00000907	protein_coding	B0240.3	-0.274367	0.463366
daf-12	WBGene00000908	protein_coding	F11A1.3	-0.211409	0.0864394
daf-14	WBGene00000910	protein_coding	F01G10.8	-0.18557	0.261959
daf-15	WBGene00000911	protein_coding	C10C5.6	-0.0516005	0.71654
daf-16	WBGene00000912	protein_coding	R13H8.1	0.193988	0.412314
daf-18	WBGene00000913	protein_coding	T07A9.6	0.723503	0.0180927
daf-19	WBGene00000914	protein_coding	F33H1.1	-0.268843	0.137052
daf-21	WBGene00000915	protein_coding	C47E8.5	0.627955	0.00387768
daf-25	WBGene00000917	protein_coding	Y48G1A.3	0.267612	0.246004
daf-28	WBGene00000920	protein_coding	Y116F11B.1	-0.06079	0.921432
dao-2	WBGene00000928	protein_coding	M03A1.7	0.291909	0.395774
dao-3	WBGene00000929	protein_coding	K07E3.3	-0.0220759	0.956211
dao-4	WBGene00000930	protein_coding	ZC373.6	0.0361328	0.906184
dao-5	WBGene00000931	protein_coding	C25A1.10	0.187571	0.481897
dao-6	WBGene00000932	protein_coding	T05G5.12	1.03117	0.00650153
dap-3	WBGene00000933	protein_coding	C14A4.2	-0.20488	0.366389
dat-1	WBGene00000934	protein_coding	T23G5.5	-0.346903	0.394003
daz-1	WBGene00000935	protein_coding	F56D1.7	1.31106	0.0004498
dbl-1	WBGene00000936	protein_coding	T25F10.2	0.129256	0.538475
dbr-1	WBGene00000937	protein_coding	C55B7.8	0.319167	0.210294
dcp-66	WBGene00000938	protein_coding	C26C6.5	-0.120288	0.458989
dcr-1	WBGene00000939	protein_coding	K12H4.8	0.392997	0.0379693
dcs-1	WBGene00000940	protein_coding	Y113G7A.9	0.219484	0.399814
ddp-1	WBGene00000941	protein_coding	Y39A3CR.4	-0.271696	0.109009
deb-1	WBGene00000942	protein_coding	ZC477.9	-0.158088	0.62068
deg-1	WBGene00000950	protein_coding	C47C12.6	-0.0680726	0.819471
deg-3	WBGene00000951	protein_coding	K03B8.9	-0.196414	0.542517
del-1	WBGene00000952	protein_coding	E02H4.1	-0.39112	0.236558
del-2	WBGene00000953	protein_coding	F58G6.6	-0.16095	0.679358
des-2	WBGene00000955	protein_coding	T26H10.1	-0.414807	0.0629454
dgk-1	WBGene00000958	protein_coding	C09E10.2	-0.142848	0.667524
dgk-2	WBGene00000959	protein_coding	F46H6.2	-0.438878	0.00035845
dgk-3	WBGene00000960	protein_coding	F54G8.2	0.12914	0.813679
dgn-1	WBGene00000961	protein_coding	T21B6.1	0.171073	0.445509
dhc-1	WBGene00000962	protein_coding	T21E12.4	0.835112	3.83e-06
dhp-1	WBGene00000963	protein_coding	R06C7.3	1.05648	3.05e-12
dhp-2	WBGene00000964	protein_coding	C47E12.8	-0.819671	1.49e-07
dhs-1	WBGene00000965	protein_coding	C01G8.3	0.0878462	0.772991
dhs-2	WBGene00000966	protein_coding	F55A12.4	-0.250704	0.484023
dhs-3	WBGene00000967	protein_coding	T02E1.5	0.407896	0.0993266
dhs-4	WBGene00000968	protein_coding	T05F1.10	-0.133815	0.733464
dhs-5	WBGene00000969	protein_coding	F56D1.5	-0.472235	0.156045
dhs-6	WBGene00000970	protein_coding	C17G10.8	0.0490858	0.895306
dhs-7	WBGene00000971	protein_coding	E04F6.7	-0.349757	0.315874
dhs-8	WBGene00000972	protein_coding	K10H10.3	0.654477	0.124364
dhs-9	WBGene00000973	protein_coding	Y32H12A.3	-0.134114	0.64528
dhs-11	WBGene00000974	protein_coding	Y39A1A.11	0.935243	0.0191542
dhs-12	WBGene00000975	protein_coding	K08F4.9	0.201222	0.376973
dhs-13	WBGene00000976	protein_coding	F36H9.3	0.252385	0.126764
dhs-14	WBGene00000977	protein_coding	R05D8.8	0.757837	0.021395
dhs-15	WBGene00000978	protein_coding	R05D8.10	-0.0480521	0.922716
dhs-16	WBGene00000979	protein_coding	C10F3.2	0.137496	0.801776
dhs-17	WBGene00000980	protein_coding	F29G9.6	-0.137734	0.493486
dhs-18	WBGene00000981	protein_coding	C45B11.3	-0.677431	0.0100274
dhs-19	WBGene00000982	protein_coding	T11F9.11	-0.250012	0.288505
dhs-20	WBGene00000983	protein_coding	F35B12.2	-0.386292	0.128888
dhs-21	WBGene00000984	protein_coding	R11D1.11	-0.053434	0.905481
dhs-22	WBGene00000985	protein_coding	C15H11.4	0.0335721	0.900112
dhs-23	WBGene00000986	protein_coding	R08H2.1	0.0561173	0.930035
dhs-24	WBGene00000987	protein_coding	Y60A3A.10	0.164859	0.278853
dhs-25	WBGene00000988	protein_coding	F09E10.3	-0.354008	0.160875
dhs-26	WBGene00000989	protein_coding	ZK816.5	0.107334	0.86243
dhs-27	WBGene00000990	protein_coding	C04F6.5	0.30963	0.404584
dhs-28	WBGene00000991	protein_coding	M03A8.1	-0.164124	0.433377
dhs-29	WBGene00000992	protein_coding	F27D9.6	-0.568565	0.00185109
dhs-30	WBGene00000993	protein_coding	T25G12.7	-0.517225	0.00642156
dic-1	WBGene00000994	protein_coding	F08B4.1	0.58232	0.0210802
die-1	WBGene00000995	protein_coding	C18D1.1	-0.0412944	0.903403
dif-1	WBGene00000996	protein_coding	F49E8.5	0.0026072	0.996334
dig-1	WBGene00000998	protein_coding	K07E12.1	-0.120494	0.672183
dim-1	WBGene00001000	protein_coding	C18A11.7	-0.243861	0.220877
dis-3	WBGene00001001	protein_coding	C04G2.6	0.0866293	0.760779
div-1	WBGene00001002	protein_coding	R01H10.1	0.810023	0.00679273
dlc-1	WBGene00001005	protein_coding	T26A5.9	-0.226881	0.0261698
dlg-1	WBGene00001006	protein_coding	C25F6.2	-0.206698	0.305446
dli-1	WBGene00001007	protein_coding	C39E9.14	0.348374	0.0349145
dlk-1	WBGene00001008	protein_coding	F33E2.2	-0.239582	0.207044
dna-2	WBGene00001016	protein_coding	F43G6.1	1.02896	0.00683395
dnc-1	WBGene00001017	protein_coding	ZK593.5	0.176344	0.104012
dnc-2	WBGene00001018	protein_coding	C28H8.12	0.387177	0.0335436
dnj-1	WBGene00001019	protein_coding	B0035.14	-0.165697	0.215431
dnj-2	WBGene00001020	protein_coding	B0035.2	0.292377	0.345417
dnj-3	WBGene00001021	protein_coding	C01G10.12	0.175563	0.695377
dnj-4	WBGene00001022	protein_coding	C01G8.4	0.225003	0.461946
dnj-5	WBGene00001023	protein_coding	C04A2.7	0.0600591	0.781558
dnj-7	WBGene00001025	protein_coding	C55B6.2	-0.40832	0.0204036
dnj-8	WBGene00001026	protein_coding	C56C10.13	-0.075685	0.632385
dnj-9	WBGene00001027	protein_coding	F11G11.7	-0.0191648	0.920696
dnj-10	WBGene00001028	protein_coding	F22B7.5	0.066121	0.813583
dnj-11	WBGene00001029	protein_coding	F38A5.13	0.669612	0.00369147
dnj-12	WBGene00001030	protein_coding	F39B2.10	0.105466	0.648132
dnj-13	WBGene00001031	protein_coding	F54D5.8	1.18596	0.00183671
dnj-14	WBGene00001032	protein_coding	K02G10.8	-0.0986423	0.532239
dnj-15	WBGene00001033	protein_coding	K08D10.2	0.0869849	0.794743
dnj-16	WBGene00001034	protein_coding	R74.4	-0.0652411	0.747682
dnj-17	WBGene00001035	protein_coding	T03F6.2	-0.087463	0.798337
dnj-18	WBGene00001036	protein_coding	T04A8.9	0.0405388	0.887569
dnj-19	WBGene00001037	protein_coding	T05C3.5	0.0980008	0.740216
dnj-20	WBGene00001038	protein_coding	T15H9.7	0.140062	0.390415
dnj-21	WBGene00001039	protein_coding	T19B4.4	-0.156121	0.69582
dnj-22	WBGene00001040	protein_coding	T23B12.7	0.802318	0.0110071
dnj-23	WBGene00001041	protein_coding	T24H10.3	0.374265	0.101668
dnj-24	WBGene00001042	protein_coding	W03A5.7	0.0194916	0.936616
dnj-25	WBGene00001043	protein_coding	W07A8.3	0.0563169	0.70824
dnj-26	WBGene00001044	protein_coding	Y39C12A.8	0.720543	0.0873258
dnj-27	WBGene00001045	protein_coding	Y47H9C.5	0.264833	0.322001
dnj-28	WBGene00001046	protein_coding	Y54E10BL.4	0.369536	0.155726
dnj-29	WBGene00001047	protein_coding	Y63D3A.6	0.0872873	0.588784
dnj-30	WBGene00001048	protein_coding	Y71F9B.16	0.246205	0.398863
dog-1	WBGene00001049	protein_coding	F33H2.1	1.09379	0.00011676
dom-3	WBGene00001050	protein_coding	F54C1.2	0.511917	0.0319586
cks-1	WBGene00001051	protein_coding	C09G4.3	1.13002	0.00012614
dop-1	WBGene00001052	protein_coding	F15A8.5	-0.310916	0.179338
dop-2	WBGene00001053	protein_coding	K09G1.4	-0.324309	0.350672
dpf-1	WBGene00001054	protein_coding	T23F1.7	-0.269519	0.171263
dpf-2	WBGene00001055	protein_coding	C27C12.7	-0.258534	0.317219
dpf-3	WBGene00001056	protein_coding	K02F2.1	0.369091	0.0121438
dpf-4	WBGene00001057	protein_coding	F01F1.5	0.0703574	0.713983
dpf-5	WBGene00001058	protein_coding	R11E3.8	0.30102	0.0679365
dpf-6	WBGene00001059	protein_coding	F44B9.1	0.434408	0.221876
dpf-7	WBGene00001060	protein_coding	R11E3.7	0.289537	0.136778
dpl-1	WBGene00001061	protein_coding	T23G7.1	0.86669	0.00011382
dpr-1	WBGene00001062	protein_coding	R10D12.2	-0.540465	0.218644
dpy-1	WBGene00001063	protein_coding	M01E10.2	0.726228	0.0789453
dpy-2	WBGene00001064	protein_coding	T14B4.6	0.53643	0.21816
dpy-3	WBGene00001065	protein_coding	EGAP7.1	0.0482709	0.936577
dpy-4	WBGene00001066	protein_coding	Y41E3.2	-0.0796559	0.900852
dpy-5	WBGene00001067	protein_coding	F27C1.8	0.28408	0.377702
dpy-6	WBGene00001068	protein_coding	F16F9.2	0.424564	0.0720571
dpy-7	WBGene00001069	protein_coding	F46C8.6	-0.0797862	0.896437
dpy-8	WBGene00001070	protein_coding	C31H2.2	-0.276156	0.585594
dpy-9	WBGene00001071	protein_coding	T21D12.2	0.814331	0.0371361
dpy-10	WBGene00001072	protein_coding	T14B4.7	0.513286	0.221724
dpy-11	WBGene00001073	protein_coding	F46E10.9	0.0431045	0.850202
dpy-13	WBGene00001074	protein_coding	F30B5.1	0.360249	0.38807
dpy-14	WBGene00001075	protein_coding	H27M09.4	0.286071	0.54099
dpy-17	WBGene00001076	protein_coding	F54D8.1	-0.0215598	0.973925
dpy-18	WBGene00001077	protein_coding	Y47D3B.10	0.078449	0.87785
dpy-19	WBGene00001078	protein_coding	F22B7.10	-0.175413	0.545127
dpy-20	WBGene00001079	protein_coding	T22B3.1	-0.383409	0.422173
dpy-21	WBGene00001080	protein_coding	Y59A8B.1	0.217301	0.373632
dpy-22	WBGene00001081	protein_coding	F47A4.2	0.00610689	0.980147
dpy-23	WBGene00001082	protein_coding	R160.1	-0.148372	0.570531
dpy-26	WBGene00001085	protein_coding	C25G4.5	0.201119	0.199672
dpy-27	WBGene00001086	protein_coding	R13G10.1	-0.127228	0.369389
dpy-28	WBGene00001087	protein_coding	Y39A1B.3	-0.0896584	0.484081
dpy-30	WBGene00001088	protein_coding	ZK863.6	0.209908	0.167013
dre-1	WBGene00001089	protein_coding	K04A8.6	-0.0239845	0.901866
drh-1	WBGene00001090	protein_coding	F15B10.2	0.757647	0.00163597
dro-1	WBGene00001092	protein_coding	F53A2.5	0.755982	0.00789228
drp-1	WBGene00001093	protein_coding	T12E12.4	0.16499	0.303909
dars-1	WBGene00001094	protein_coding	B0464.1	0.203132	0.120343
dars-2	WBGene00001095	protein_coding	F10C2.6	0.107567	0.80294
dsc-1	WBGene00001096	protein_coding	C18B12.3	-0.314057	0.453239
dsc-4	WBGene00001099	protein_coding	K02D7.4	-0.972602	1.12e-05
dsh-1	WBGene00001101	protein_coding	C34F11.9	-0.276839	0.0082365
dsh-2	WBGene00001102	protein_coding	C27A2.6	0.900819	0.00352211
dsl-1	WBGene00001103	protein_coding	W09G12.4	0.270865	0.566394
dsl-2	WBGene00001104	protein_coding	W09G12.1	0.423127	0.362064
dsl-3	WBGene00001105	protein_coding	Y41D4B.10	0.270865	0.596907
dsl-4	WBGene00001106	protein_coding	F16B12.2	0.372965	0.423022
dsl-5	WBGene00001107	protein_coding	F58B3.8	-0.343701	0.458921
dsl-6	WBGene00001108	protein_coding	H02I12.4	-0.1647	0.766521
dsl-7	WBGene00001109	protein_coding	F15B9.9	-0.225667	0.426976
duo-1	WBGene00001110	protein_coding	F38B7.5	1.11886	0.00137585
duo-3	WBGene00001112	protein_coding	Y106G6H.12	0.685889	0.00122391
dur-1	WBGene00001113	protein_coding	F25H8.5	-0.0862598	0.749443
dyb-1	WBGene00001115	protein_coding	F47G6.1	-0.316805	0.109954
dyc-1	WBGene00001116	protein_coding	C33G3.1	-0.249047	0.195996
dyf-1	WBGene00001117	protein_coding	F54C1.5	-0.162451	0.641129
dyf-2	WBGene00001118	protein_coding	ZK520.3	-0.00400715	0.99363
dyf-3	WBGene00001119	protein_coding	C04C3.5	-0.167443	0.704621
dyf-5	WBGene00001121	protein_coding	M04C9.5	-0.443543	0.112252
dyf-6	WBGene00001122	protein_coding	F46F6.4	-0.387283	0.124041
dyf-7	WBGene00001123	protein_coding	C43C3.3	0.0450828	0.943625
dyf-11	WBGene00001127	protein_coding	C02H7.1	-0.683805	0.00606932
dyf-13	WBGene00001129	protein_coding	C27H5.7	0.0144967	0.979417
dyn-1	WBGene00001130	protein_coding	C02C6.1	0.0865299	0.845724
dys-1	WBGene00001131	protein_coding	F15D3.1	0.323777	0.127049
alp-1	WBGene00001132	protein_coding	T11B7.4	-0.568635	0.0579545
eat-2	WBGene00001133	protein_coding	Y48B6A.4	0.277497	0.591053
eat-3	WBGene00001134	protein_coding	D2013.5	0.247473	0.0683153
eat-4	WBGene00001135	protein_coding	ZK512.6	-0.492819	0.0338908
eat-5	WBGene00001136	protein_coding	F13G3.8	0.222892	0.628862
eat-6	WBGene00001137	protein_coding	B0365.3	-0.305155	0.150681
eat-16	WBGene00001145	protein_coding	C16C2.2	-0.301928	0.0841169
eat-18	WBGene00001147	protein_coding	Y105E8A.7	0.0458377	0.888363
eat-20	WBGene00001148	protein_coding	H30A04.1	0.719874	0.0139425
bcat-1	WBGene00001149	protein_coding	K02A4.1	-0.29822	0.064408
ech-1	WBGene00001150	protein_coding	C29F3.1	0.479398	0.230524
ech-2	WBGene00001151	protein_coding	F38H4.8	0.0532751	0.833454
ech-3	WBGene00001152	protein_coding	F43H9.1	-0.360369	0.115343
ech-4	WBGene00001153	protein_coding	R06F6.9	0.110014	0.70049
ech-5	WBGene00001154	protein_coding	F56B3.5	0.131702	0.605755
ech-6	WBGene00001155	protein_coding	T05G5.6	-0.0306248	0.923263
ech-7	WBGene00001156	protein_coding	Y105E8A.4	0.135129	0.757
ech-8	WBGene00001157	protein_coding	F01G10.2	-0.652461	0.0131415
ech-9	WBGene00001158	protein_coding	F01G10.3	0.484576	0.231435
eff-1	WBGene00001159	protein_coding	C26D10.5	-0.334041	0.222118
efk-1	WBGene00001160	protein_coding	F42A10.4	0.245662	0.411749
efl-1	WBGene00001161	protein_coding	Y102A5C.18	1.19511	3.72e-08
efl-2	WBGene00001162	protein_coding	Y48C3A.17	0.0024281	0.995965
efn-2	WBGene00001163	protein_coding	C43F9.8	-0.305552	0.266055
efn-3	WBGene00001164	protein_coding	F15A2.5	0.318021	0.410109
efn-4	WBGene00001165	protein_coding	F56A11.3	-0.2467	0.385077
eftu-2	WBGene00001166	protein_coding	ZK328.2	1.02504	3.7e-05
eef-2	WBGene00001167	protein_coding	F25H5.4	0.191716	0.257953
eef-1A.1	WBGene00001168	protein_coding	F31E3.5	0.281565	0.254084
eef-1A.2	WBGene00001169	protein_coding	R03G5.1	0.62344	0.00087402
egl-1	WBGene00001170	protein_coding	F23B12.9	0.183318	0.709006
egl-2	WBGene00001171	protein_coding	F16B3.1	-0.321521	0.144305
egl-3	WBGene00001172	protein_coding	C51E3.7	-0.173501	0.672663
egl-4	WBGene00001173	protein_coding	F55A8.2	-0.0203333	0.928309
egl-5	WBGene00001174	protein_coding	C08C3.1	-0.609654	0.0210624
egl-6	WBGene00001175	protein_coding	C46F4.1	-0.353631	0.226458
egl-8	WBGene00001177	protein_coding	B0348.4	-0.223262	0.105491
egl-9	WBGene00001178	protein_coding	F22E12.4	-0.394587	0.211739
egl-10	WBGene00001179	protein_coding	F28C1.2	-0.311547	0.0856447
egl-13	WBGene00001182	protein_coding	T22B7.1	-0.259757	0.186804
egl-15	WBGene00001184	protein_coding	F58A3.2	-0.108735	0.55425
egl-17	WBGene00001185	protein_coding	F38G1.2	0.181768	0.715146
egl-18	WBGene00001186	protein_coding	F55A8.1	-0.294042	0.101668
egl-19	WBGene00001187	protein_coding	C48A7.1	-0.313796	0.154525
egl-20	WBGene00001188	protein_coding	W08D2.1	-0.672429	0.00724475
egl-21	WBGene00001189	protein_coding	F01D4.4	-0.285313	0.352197
egl-23	WBGene00001190	protein_coding	Y37A1B.11	-0.628959	0.00444209
egl-26	WBGene00001193	protein_coding	C23H3.1	0.1254	0.543279
egl-27	WBGene00001194	protein_coding	C04A2.3	-0.182086	0.113293
egl-30	WBGene00001196	protein_coding	M01D7.7	0.0144951	0.964652
egl-36	WBGene00001202	protein_coding	R07A4.1	-0.400808	0.205918
egl-38	WBGene00001204	protein_coding	C04G2.7	-0.351288	0.133156
egl-43	WBGene00001207	protein_coding	R53.3	-0.533257	0.0032477
egl-44	WBGene00001208	protein_coding	F28B12.2	-0.239219	0.00825641
egl-45	WBGene00001209	protein_coding	C27D11.1	0.286487	0.163974
egl-46	WBGene00001210	protein_coding	K11G9.4	-0.290172	0.508505
egl-47	WBGene00001211	protein_coding	C50H2.2	-0.444434	0.0907388
ego-1	WBGene00001214	protein_coding	F26A3.3	1.0542	0.0013202
ego-2	WBGene00001215	protein_coding	Y53H1C.2	0.274906	0.136706
ehn-3	WBGene00001223	protein_coding	ZK616.10	-0.165867	0.757141
ehs-1	WBGene00001224	protein_coding	ZK1248.3	-0.146173	0.571975
eif-3.B	WBGene00001225	protein_coding	Y54E2A.11	0.188663	0.378661
eif-3.C	WBGene00001226	protein_coding	T23D8.4	0.36754	0.0924301
eif-3.D	WBGene00001227	protein_coding	R08D7.3	0.192608	0.380493
eif-3.E	WBGene00001228	protein_coding	B0511.10	0.0444376	0.851
eif-3.F	WBGene00001229	protein_coding	D2013.7	0.0395395	0.871558
eif-3.G	WBGene00001230	protein_coding	F22B5.2	0.15151	0.421508
eif-3.H	WBGene00001231	protein_coding	C41D11.2	0.0105663	0.975353
eif-3.I	WBGene00001232	protein_coding	Y74C10AR.1	0.0956741	0.699134
eif-3.K	WBGene00001233	protein_coding	T16G1.11	0.0285242	0.927729
eif-6	WBGene00001234	protein_coding	C47B2.5	-0.00690811	0.988353
elb-1	WBGene00001235	protein_coding	Y41C4A.10	0.206226	0.449574
elc-1	WBGene00001236	protein_coding	Y82E9BR.15	-0.0299723	0.890897
elc-2	WBGene00001237	protein_coding	W03H1.2	-0.0843046	0.896658
elo-1	WBGene00001239	protein_coding	F56H11.4	-0.526511	0.00583338
elo-2	WBGene00001240	protein_coding	F11E6.5	-0.369061	0.0393925
elo-3	WBGene00001241	protein_coding	D2024.3	0.00835699	0.979678
elo-4	WBGene00001242	protein_coding	C40H1.4	0.0191983	0.980708
elo-5	WBGene00001243	protein_coding	F41H10.7	0.0521997	0.87306
elo-6	WBGene00001244	protein_coding	F41H10.8	-0.652414	0.00123401
elo-7	WBGene00001245	protein_coding	F56H11.3	0.0772305	0.906331
elo-8	WBGene00001246	protein_coding	Y47D3A.30	0.0752931	0.901446
elo-9	WBGene00001247	protein_coding	Y53F4B.2	-0.207842	0.441169
elp-1	WBGene00001248	protein_coding	F38A6.2	0.0712651	0.718932
elt-1	WBGene00001249	protein_coding	W09C2.1	-0.419756	0.00356898
elt-2	WBGene00001250	protein_coding	C33D3.1	0.312124	0.189872
elt-3	WBGene00001251	protein_coding	K02B9.4	-0.117511	0.599114
elt-4	WBGene00001252	protein_coding	C39B10.6	-0.0473717	0.940528
elt-6	WBGene00001253	protein_coding	F52C12.5	-0.175663	0.539786
emb-4	WBGene00001258	protein_coding	Y80D3A.2	0.824384	1.72e-05
emb-5	WBGene00001259	protein_coding	T04A8.14	0.278217	0.0631009
emb-8	WBGene00001262	protein_coding	K10D2.6	-0.0326645	0.924962
emb-9	WBGene00001263	protein_coding	K04H4.1	0.20259	0.391538
emb-27	WBGene00001281	protein_coding	F10B5.6	0.644834	0.00363189
emb-30	WBGene00001284	protein_coding	F54C8.3	0.10869	0.55369
emo-1	WBGene00001303	protein_coding	F32D8.6	0.0395978	0.883154
emr-1	WBGene00001309	protein_coding	M01D7.6	0.133018	0.596889
end-1	WBGene00001310	protein_coding	F58E10.2	0.0440354	0.941557
end-3	WBGene00001311	protein_coding	F58E10.5	0.286622	0.513238
ent-1	WBGene00001320	protein_coding	ZK809.4	0.585359	0.00547504
eor-1	WBGene00001324	protein_coding	R11E3.6	0.269918	0.0796661
eor-2	WBGene00001325	protein_coding	C44H4.7	-0.136676	0.388254
epi-1	WBGene00001328	protein_coding	K08C7.3	0.0568144	0.811272
epn-1	WBGene00001329	protein_coding	T04C10.2	-0.00670875	0.986861
eps-8	WBGene00001330	protein_coding	Y57G11C.24	-0.377609	0.0147659
erd-2	WBGene00001331	protein_coding	F09B9.3	-0.0265839	0.912547
eri-1	WBGene00001332	protein_coding	T07A9.5	0.21524	0.376244
erm-1	WBGene00001333	protein_coding	C01G8.5	-0.103795	0.571229
ero-1	WBGene00001334	protein_coding	Y105E8B.8	0.0304521	0.922973
erp-1	WBGene00001335	protein_coding	F35A5.8	-0.367306	0.0989917
qars-1	WBGene00001336	protein_coding	Y41E3.4	0.416502	0.00570544
ears-1	WBGene00001337	protein_coding	ZC434.5	0.208062	0.224438
ears-2	WBGene00001338	protein_coding	T07A9.2	-0.101931	0.654156
etr-1	WBGene00001340	protein_coding	T01D1.2	-0.102667	0.566083
fos-1	WBGene00001345	protein_coding	F29G9.4	-0.260419	0.0878679
evl-14	WBGene00001352	protein_coding	H38K22.1	0.0176187	0.918091
evl-20	WBGene00001358	protein_coding	F22B5.1	0.123434	0.69335
exc-4	WBGene00001365	protein_coding	Y105E8A.22	0.485312	0.0146539
exc-5	WBGene00001366	protein_coding	C33D9.1	-0.307552	0.0583479
exc-7	WBGene00001368	protein_coding	F35H8.5	-0.0214891	0.951659
exl-1	WBGene00001371	protein_coding	F26H11.5	0.106447	0.732853
exo-3	WBGene00001372	protein_coding	R09B3.1	1.22447	0.00117519
exp-1	WBGene00001373	protein_coding	H35N03.1	-0.509881	0.0158982
exp-2	WBGene00001374	protein_coding	F12F3.1	-0.271198	0.323768
eya-1	WBGene00001377	protein_coding	C49A1.4	-0.169179	0.730728
far-1	WBGene00001385	protein_coding	F02A9.2	-0.312771	0.0461708
far-2	WBGene00001386	protein_coding	F02A9.3	0.9137	0.0215986
far-3	WBGene00001387	protein_coding	F15B9.1	1.56181	2.7e-05
far-4	WBGene00001388	protein_coding	F15B9.2	0.0211118	NA
far-5	WBGene00001389	protein_coding	F15B9.3	-0.244906	0.421989
far-6	WBGene00001390	protein_coding	W02A2.2	0.757403	0.0682347
far-7	WBGene00001391	protein_coding	K01A2.2	-0.218648	0.61069
far-8	WBGene00001392	protein_coding	K02F3.3	-0.234091	0.633309
fat-1	WBGene00001393	protein_coding	Y67H2A.8	0.206526	0.37928
fat-2	WBGene00001394	protein_coding	W02A2.1	-0.240143	0.373679
fat-3	WBGene00001395	protein_coding	W08D2.4	0.252306	0.452599
fat-4	WBGene00001396	protein_coding	T13F2.1	0.384482	0.123874
fat-5	WBGene00001397	protein_coding	W06D12.3	-0.3197	0.44003
fat-6	WBGene00001398	protein_coding	VZK822L.1	0.104291	0.795211
fat-7	WBGene00001399	protein_coding	F10D2.9	0.390882	0.416518
fax-1	WBGene00001400	protein_coding	F56E3.4	-0.0737317	0.88698
fbf-1	WBGene00001401	protein_coding	H12I13.4	1.03571	0.0076379
fbf-2	WBGene00001402	protein_coding	F21H12.5	0.532314	0.175851
fbl-1	WBGene00001403	protein_coding	F56H11.1	-0.595643	0.00294165
fbp-1	WBGene00001404	protein_coding	K07A3.1	-0.322716	0.113882
fce-1	WBGene00001405	protein_coding	C04F12.10	0.0755388	0.652885
fce-2	WBGene00001406	protein_coding	F48F5.5	0.0720538	0.824452
feh-1	WBGene00001410	protein_coding	Y54F10AM.2	-0.362443	0.309564
fem-1	WBGene00001411	protein_coding	F35D6.1	0.0717095	0.714558
fem-2	WBGene00001412	protein_coding	T19C3.8	0.208793	0.303017
fem-3	WBGene00001413	protein_coding	C01F6.4	0.829247	0.0284884
fer-1	WBGene00001414	protein_coding	F43G9.6	0.852164	0.0344082
fib-1	WBGene00001423	protein_coding	T01C3.7	-0.270109	0.390703
fis-1	WBGene00001424	protein_coding	F41G3.4	0.028553	NA
fis-2	WBGene00001425	protein_coding	F13B9.8	0.0926881	0.707307
fkb-1	WBGene00001426	protein_coding	F36H1.1	-0.187659	0.166794
fkb-2	WBGene00001427	protein_coding	Y18D10A.19	0.570601	0.00034868
fkb-3	WBGene00001428	protein_coding	C05C8.3	-0.00192822	0.997227
fkb-4	WBGene00001429	protein_coding	ZC455.10	0.57105	0.0365434
fkb-5	WBGene00001430	protein_coding	C50F2.6	0.177195	0.71744
fkb-6	WBGene00001431	protein_coding	F31D4.3	0.677583	0.0160995
fkb-7	WBGene00001432	protein_coding	B0511.1	0.0393773	0.951187
fkb-8	WBGene00001433	protein_coding	Y18D10A.25	0.25861	0.193532
fkh-2	WBGene00001434	protein_coding	T14G12.4	0.1145	0.846211
fkh-3	WBGene00001435	protein_coding	C29F7.4	0.708637	0.0131926
fkh-4	WBGene00001436	protein_coding	C29F7.5	0.303383	0.201564
fkh-5	WBGene00001437	protein_coding	F26A1.2	-0.326665	0.497657
fkh-6	WBGene00001438	protein_coding	B0286.5	-0.152976	0.746366
fkh-7	WBGene00001439	protein_coding	F26D12.1	-0.362294	0.120199
fkh-8	WBGene00001440	protein_coding	F40H3.4	-0.372617	0.195208
fkh-9	WBGene00001441	protein_coding	K03C7.2	-0.253077	0.104012
fkh-10	WBGene00001442	protein_coding	C25A1.2	-0.255797	0.497192
fli-1	WBGene00001443	protein_coding	B0523.5	0.220436	0.247727
flp-1	WBGene00001444	protein_coding	F23B2.5	0.0894222	0.852072
flp-2	WBGene00001445	protein_coding	W07E11.3	-0.214743	0.589559
flp-3	WBGene00001446	protein_coding	W07E11.2	-0.205379	0.597189
flp-4	WBGene00001447	protein_coding	C18D1.3	-0.587536	0.0172515
flp-5	WBGene00001448	protein_coding	C03G5.7	-0.395824	0.0835687
flp-6	WBGene00001449	protein_coding	F07D3.2	-0.446345	0.140452
flp-7	WBGene00001450	protein_coding	F49E10.3	-0.501641	0.0443232
flp-8	WBGene00001451	protein_coding	F31F6.4	-0.684357	0.018385
flp-9	WBGene00001452	protein_coding	C36H8.3	-0.186205	0.53831
flp-10	WBGene00001453	protein_coding	T06C10.4	-0.051602	0.883152
flp-11	WBGene00001454	protein_coding	K02G10.4	0.0531587	0.905481
flp-12	WBGene00001455	protein_coding	C05E11.8	-0.265873	0.433072
flp-13	WBGene00001456	protein_coding	F33D4.3	-0.226741	0.590832
flp-14	WBGene00001457	protein_coding	Y37D8A.15	-0.231073	0.491837
flp-15	WBGene00001458	protein_coding	ZK525.1	-0.358505	0.0979717
flp-16	WBGene00001459	protein_coding	F15D4.8	-0.556652	0.0054716
flp-17	WBGene00001460	protein_coding	C52D10.11	-0.295899	0.430669
flp-18	WBGene00001461	protein_coding	Y48D7A.2	0.0830106	0.862137
flp-19	WBGene00001462	protein_coding	M79.4	-0.253139	0.448553
flp-20	WBGene00001463	protein_coding	E01H11.3	-0.321463	0.294957
flp-21	WBGene00001464	protein_coding	C26F1.10	-0.193664	0.576458
flr-1	WBGene00001465	protein_coding	F02D10.5	-0.261726	0.35759
flr-2	WBGene00001466	protein_coding	F58H1.4	-0.410333	0.227604
flr-4	WBGene00001468	protein_coding	F09B12.6	0.208676	0.59561
flt-1	WBGene00001470	protein_coding	ZK783.4	-0.100661	0.699464
fmi-1	WBGene00001475	protein_coding	F15B9.7	-0.577362	0.00396064
fmo-1	WBGene00001476	protein_coding	K08C7.2	-0.551852	0.00451516
fmo-2	WBGene00001477	protein_coding	K08C7.5	0.393357	0.412612
fmo-3	WBGene00001478	protein_coding	Y39A1A.19	0.225492	0.572136
fmo-4	WBGene00001479	protein_coding	F53F4.5	0.341451	0.182493
fmo-5	WBGene00001480	protein_coding	H24K24.5	0.209622	0.412612
fog-1	WBGene00001481	protein_coding	Y54E10A.4	0.854451	0.00452959
fog-2	WBGene00001482	protein_coding	Y113G7B.5	1.05094	0.00717508
fog-3	WBGene00001483	protein_coding	C03C11.2	1.04171	0.00765252
fox-1	WBGene00001484	protein_coding	T07D1.4	-0.105644	0.760425
fre-1	WBGene00001485	protein_coding	Y113G7A.8	0.154242	0.446077
frh-1	WBGene00001486	protein_coding	F59G1.7	-0.127683	0.726541
frk-1	WBGene00001487	protein_coding	T04B2.2	0.669693	0.11779
frm-1	WBGene00001488	protein_coding	ZK270.2	-0.0691674	0.826146
frm-2	WBGene00001489	protein_coding	T04C9.6	-0.396103	0.0360081
frm-3	WBGene00001490	protein_coding	H05G16.1	-0.0311771	0.917812
frm-4	WBGene00001491	protein_coding	C24A11.8	-0.298761	0.0455064
frm-5.1	WBGene00001492	protein_coding	Y38C1AB.8	0.195446	0.3046
frm-7	WBGene00001493	protein_coding	C51F7.1	-0.081395	0.628975
frm-8	WBGene00001494	protein_coding	H09G03.2	-0.190319	0.549047
frm-9	WBGene00001495	protein_coding	F31B12.3	-0.0621863	0.899039
frm-10	WBGene00001496	protein_coding	F25H9.5	-0.243445	0.156059
fars-1	WBGene00001497	protein_coding	T08B2.9	0.178583	0.481934
fars-3	WBGene00001498	protein_coding	F22B5.9	0.111886	0.555346
fsn-1	WBGene00001499	protein_coding	C26E6.5	0.434281	0.0886061
ftn-1	WBGene00001500	protein_coding	C54F6.14	1.01479	0.00030869
ftn-2	WBGene00001501	protein_coding	D1037.3	-0.160797	0.367861
ftt-2	WBGene00001502	protein_coding	F52D10.3	-0.525381	0.00616469
fum-1	WBGene00001503	protein_coding	H14A12.2	-0.0450718	0.907059
fut-1	WBGene00001505	protein_coding	K08F8.3	-0.0998816	0.624669
fut-2	WBGene00001506	protein_coding	EGAP9.2	0.0867892	0.825624
fut-4	WBGene00001507	protein_coding	K12H6.3	-0.644997	0.112228
fut-8	WBGene00001508	protein_coding	C10F3.6	-0.333605	0.0594697
fzo-1	WBGene00001509	protein_coding	ZK1248.14	-0.0200379	0.926807
fzr-1	WBGene00001510	protein_coding	ZK1307.6	0.0730809	0.791656
fzy-1	WBGene00001511	protein_coding	ZK177.6	1.24079	0.00103446
gab-1	WBGene00001512	protein_coding	ZC482.1	-0.123655	0.509847
gad-1	WBGene00001513	protein_coding	T05H4.14	0.422959	0.0879846
xnd-1	WBGene00001514	protein_coding	C05D2.5	1.01996	0.00949633
gap-1	WBGene00001515	protein_coding	T24C12.2	-0.159056	0.364685
gap-2	WBGene00001516	protein_coding	ZK899.8	-0.136341	0.53009
gar-1	WBGene00001517	protein_coding	C15B12.5	-0.179181	0.637211
gar-2	WBGene00001518	protein_coding	F47D12.1	-0.495892	0.0616208
gar-3	WBGene00001519	protein_coding	Y40H4A.1	-0.431794	0.0140535
gas-1	WBGene00001520	protein_coding	K09A9.5	-0.261011	0.0677618
gbh-1	WBGene00001522	protein_coding	D2089.5	0.0898248	0.833967
gbh-2	WBGene00001523	protein_coding	M05D6.7	-0.669261	7.44e-05
gck-1	WBGene00001526	protein_coding	T19A5.2	0.162729	0.371497
gcs-1	WBGene00001527	protein_coding	F37B12.2	-0.076912	0.718601
gcy-1	WBGene00001528	protein_coding	AH6.1	-0.167533	0.738606
gcy-2	WBGene00001529	protein_coding	R134.2	-0.123528	0.784184
gcy-3	WBGene00001530	protein_coding	R134.1	-0.596716	0.166048
gcy-4	WBGene00001531	protein_coding	ZK970.5	-0.326654	0.477374
gcy-5	WBGene00001532	protein_coding	ZK970.6	0.524601	0.150681
gcy-6	WBGene00001533	protein_coding	B0024.6	-0.313431	0.486634
gcy-7	WBGene00001534	protein_coding	F52E1.4	0.0019703	0.998477
gcy-8	WBGene00001535	protein_coding	C49H3.1	0.0258263	0.960939
gcy-9	WBGene00001536	protein_coding	ZK455.2	-0.495358	0.138428
gcy-11	WBGene00001537	protein_coding	C30G4.3	-0.456197	0.0636365
gcy-12	WBGene00001538	protein_coding	F08B1.2	-0.0907422	0.745585
gcy-13	WBGene00001539	protein_coding	F23H12.6	-1.01479	4.37e-08
gcy-14	WBGene00001540	protein_coding	ZC412.2	0.0863224	0.894734
gcy-15	WBGene00001541	protein_coding	ZC239.7	0.258807	0.60243
gcy-17	WBGene00001542	protein_coding	W03F11.2	0.161956	0.774249
gcy-18	WBGene00001543	protein_coding	ZK896.8	-0.053848	0.929127
gcy-19	WBGene00001544	protein_coding	C17F4.6	0.44475	0.340462
gcy-20	WBGene00001545	protein_coding	F21H7.9	-0.3205	0.505491
gcy-21	WBGene00001546	protein_coding	F22E5.3	0.144648	0.807766
gcy-22	WBGene00001547	protein_coding	T03D8.5	-0.162272	0.721211
gcy-23	WBGene00001548	protein_coding	T26C12.4	0.185622	0.721983
gcy-25	WBGene00001549	protein_coding	Y105C5B.2	0.0792967	0.899522
gcy-27	WBGene00001550	protein_coding	C06A12.4	-0.087888	0.861849
gcy-31	WBGene00001551	protein_coding	T07D1.1	-0.129185	0.765789
gcy-32	WBGene00001552	protein_coding	C06B3.8	-0.349616	0.34542
gcy-33	WBGene00001553	protein_coding	F57F5.2	-0.226134	0.615539
gcy-34	WBGene00001554	protein_coding	M04G12.3	0.0255267	0.953728
gcy-35	WBGene00001555	protein_coding	T04D3.4	-0.309119	0.0686881
gcy-36	WBGene00001556	protein_coding	C46E1.2	-0.131344	0.715146
gcy-37	WBGene00001557	protein_coding	C54E4.3	-0.466234	0.253023
gdi-1	WBGene00001558	protein_coding	Y57G11C.10	-0.152973	0.378661
gei-1	WBGene00001559	protein_coding	F45H7.2	0.196142	0.249924
gei-3	WBGene00001560	protein_coding	T22H6.6	-0.207446	0.376414
gei-4	WBGene00001561	protein_coding	W07B3.2	-0.444127	0.110066
lin-66	WBGene00001562	protein_coding	B0513.1	0.0825844	0.804706
gei-6	WBGene00001563	protein_coding	C05C8.4	0.18381	0.394185
icl-1	WBGene00001564	protein_coding	C05E4.9	-0.860871	0.00139491
gei-8	WBGene00001565	protein_coding	C14B9.6	-0.210342	0.343208
acdh-13	WBGene00001566	protein_coding	C28C12.9	0.023449	0.940058
snpc-4	WBGene00001568	protein_coding	F32H2.1	0.40499	0.0153612
gei-12	WBGene00001569	protein_coding	F52D2.4	1.17773	0.00076181
gei-13	WBGene00001570	protein_coding	F58A4.11	-0.309255	0.079362
gei-14	WBGene00001571	protein_coding	K01C8.5	1.04905	0.00049511
gei-15	WBGene00001572	protein_coding	M03A8.4	-0.305922	0.222118
gei-17	WBGene00001574	protein_coding	W10D5.3	-0.0198973	0.922973
gei-18	WBGene00001575	protein_coding	Y37A1B.15	-0.238011	0.654857
gem-4	WBGene00001577	protein_coding	T12A7.1	0.344525	0.134042
ges-1	WBGene00001578	protein_coding	R12A1.4	0.420202	0.182721
gex-2	WBGene00001579	protein_coding	F56A11.1	0.225091	0.133896
gex-3	WBGene00001580	protein_coding	F28D1.10	0.156055	0.34944
gfi-1	WBGene00001581	protein_coding	F57F4.3	0.0329897	0.940476
gfi-2	WBGene00001582	protein_coding	K02A11.1	0.0351378	0.824548
gfi-3	WBGene00001583	protein_coding	M163.4	-0.0851269	0.762865
nrde-4	WBGene00001584	protein_coding	F45E4.10	0.185676	0.36239
gfl-1	WBGene00001585	protein_coding	M04B2.3	0.0129547	0.975353
ggr-1	WBGene00001586	protein_coding	C09G5.1	-0.340021	0.172381
ggr-2	WBGene00001587	protein_coding	C45B2.4	-0.231335	0.501302
ggr-3	WBGene00001588	protein_coding	F09C12.1	-0.00367412	0.995965
gip-1	WBGene00001589	protein_coding	H04J21.3	0.200561	0.192021
C45G3.3	WBGene00001590	protein_coding	C45G3.3	0.0526486	0.914701
glc-1	WBGene00001591	protein_coding	F11A5.10	0.470135	0.278589
glc-2	WBGene00001592	protein_coding	F25F8.2	-0.418464	0.0365075
glc-3	WBGene00001593	protein_coding	ZC317.3	-0.276935	0.386342
glc-4	WBGene00001594	protein_coding	C27H5.8	-0.475823	0.0712821
gld-1	WBGene00001595	protein_coding	T23G11.3	1.51357	1.36e-05
gld-2	WBGene00001596	protein_coding	ZC308.1	0.127737	0.412378
gld-3	WBGene00001597	protein_coding	T07F8.3	1.18758	0.0019547
glh-1	WBGene00001598	protein_coding	T21G5.3	0.977102	0.0138403
glh-2	WBGene00001599	protein_coding	C55B7.1	0.965628	0.0102502
glh-3	WBGene00001600	protein_coding	B0414.6	1.03164	0.00669313
glh-4	WBGene00001601	protein_coding	T12F5.3	0.77902	0.0601172
gln-1	WBGene00001602	protein_coding	C45B2.5	-0.156101	0.603513
gln-2	WBGene00001603	protein_coding	K03H1.1	0.176105	0.061288
gln-3	WBGene00001604	protein_coding	Y105C5B.28	0.376522	0.146355
gln-5	WBGene00001606	protein_coding	F26D10.10	1.3399	0.00026266
gln-6	WBGene00001607	protein_coding	C28D4.3	1.52907	2.58e-05
R07B1.8	WBGene00001608	protein_coding	R07B1.8	0.112813	0.839665
glp-1	WBGene00001609	protein_coding	F02A9.6	1.12814	0.00331961
glr-1	WBGene00001612	protein_coding	C06E1.4	-0.179515	0.548029
glr-2	WBGene00001613	protein_coding	B0280.12	-0.533862	0.0700213
glr-3	WBGene00001614	protein_coding	K10D3.1	-0.197791	0.647228
glr-4	WBGene00001615	protein_coding	C06A8.9	-0.260214	0.316172
glr-5	WBGene00001616	protein_coding	ZC196.7	-0.39592	0.180272
glr-6	WBGene00001617	protein_coding	F41B4.4	-0.0496254	0.852221
glr-7	WBGene00001618	protein_coding	C43H6.9	-0.238486	0.65273
glr-8	WBGene00001619	protein_coding	F22A3.3	0.00095073	0.999197
glt-1	WBGene00001620	protein_coding	C12D12.2	-0.349923	0.203439
glt-3	WBGene00001621	protein_coding	K08F4.4	0.115739	0.799379
glt-4	WBGene00001622	protein_coding	T22E5.2	-0.314635	0.282319
glt-5	WBGene00001623	protein_coding	Y53C12A.2	-0.153856	0.610745
glt-6	WBGene00001624	protein_coding	R05G6.6	0.153609	0.749443
glt-7	WBGene00001625	protein_coding	W03G1.1	0.340145	0.389347
gly-1	WBGene00001626	protein_coding	F44F4.6	0.408701	0.372327
gly-2	WBGene00001627	protein_coding	C55B7.2	-0.115241	0.730493
gly-3	WBGene00001628	protein_coding	ZK688.8	0.0489766	0.815395
gly-4	WBGene00001629	protein_coding	Y116F11B.12	0.0334134	0.888677
gly-5	WBGene00001630	protein_coding	Y39E4B.12	0.0416089	0.829529
gly-6	WBGene00001631	protein_coding	H38K22.5	-0.0642461	0.810627
gly-7	WBGene00001632	protein_coding	Y46H3A.6	0.373975	0.03934
gly-8	WBGene00001633	protein_coding	Y66A7A.6	1.1635	5.44e-05
gly-10	WBGene00001635	protein_coding	Y45F10D.3	0.480535	0.00641458
gly-11	WBGene00001636	protein_coding	Y75B8A.9	0.577973	0.0257569
gly-12	WBGene00001637	protein_coding	F48E3.1	-0.325953	0.126212
gly-13	WBGene00001638	protein_coding	B0416.6	0.0691292	0.797149
gly-14	WBGene00001639	protein_coding	M01F1.1	0.702194	0.0977496
gly-15	WBGene00001640	protein_coding	C54C8.11	-0.0453454	0.943177
gly-16	WBGene00001641	protein_coding	T15D6.2	NA	NA
gly-17	WBGene00001642	protein_coding	T15D6.3	NA	NA
gly-18	WBGene00001643	protein_coding	F22D6.11	-0.345202	0.171803
gly-19	WBGene00001644	protein_coding	F22D6.12	-0.0664505	0.788018
gly-20	WBGene00001645	protein_coding	C03E10.4	0.0582889	0.83361
gna-1	WBGene00001646	protein_coding	B0024.12	-0.110258	0.802331
gna-2	WBGene00001647	protein_coding	T23G11.2	1.3229	0.00044925
goa-1	WBGene00001648	protein_coding	C26C6.2	-0.304394	0.0755609
gob-1	WBGene00001649	protein_coding	H13N06.3	-0.326927	0.0455094
gon-1	WBGene00001650	protein_coding	F25H8.3	0.248836	0.199255
gon-2	WBGene00001651	protein_coding	T01H8.5	0.155115	0.231551
gon-4	WBGene00001653	protein_coding	K04D7.5	0.739756	0.00099849
gop-1	WBGene00001660	protein_coding	C34E10.3	-0.0396037	0.835075
gop-2	WBGene00001661	protein_coding	C34E10.2	-0.0213435	0.949371
gop-3	WBGene00001662	protein_coding	C34E10.1	-0.152659	0.337071
gpa-1	WBGene00001663	protein_coding	T19C4.6	-0.425228	0.0794058
gpa-2	WBGene00001664	protein_coding	F38E1.5	-0.34431	0.121456
gpa-3	WBGene00001665	protein_coding	E02C12.5	-0.804834	5.49e-05
gpa-4	WBGene00001666	protein_coding	T07A9.7	-0.149023	0.678328
gpa-5	WBGene00001667	protein_coding	F53B1.7	0.169591	0.76524
gpa-6	WBGene00001668	protein_coding	F48C11.1	-0.682734	0.0533739
gpa-7	WBGene00001669	protein_coding	R10H10.5	-0.49397	0.00740191
gpa-8	WBGene00001670	protein_coding	F56H9.3	-0.265595	0.547948
gpa-9	WBGene00001671	protein_coding	F56H9.4	-0.335091	0.30935
gpa-10	WBGene00001672	protein_coding	C55H1.2	-0.516508	0.105957
gpa-11	WBGene00001673	protein_coding	C16A11.1	-0.762333	0.00026749
gpa-12	WBGene00001674	protein_coding	F18G5.3	-0.518995	0.00737984
gpa-13	WBGene00001675	protein_coding	F18E2.5	-0.612204	0.044315
gpa-14	WBGene00001676	protein_coding	B0207.3	-0.857568	7.66e-05
gpa-15	WBGene00001677	protein_coding	M04C7.1	-0.783386	0.00293644
gpa-16	WBGene00001678	protein_coding	Y95B8A.5	0.657217	0.0002818
gpb-1	WBGene00001679	protein_coding	F13D12.7	0.0992274	0.718734
gpb-2	WBGene00001680	protein_coding	F52A8.2	-0.263708	0.191996
gpc-1	WBGene00001681	protein_coding	K02A4.2	-0.696359	0.00183589
gpc-2	WBGene00001682	protein_coding	F08B6.2	-0.420752	0.00236359
gpd-1	WBGene00001683	protein_coding	T09F3.3	1.56838	1.83e-05
gpd-2	WBGene00001684	protein_coding	K10B3.8	-0.093518	0.796858
gpd-3	WBGene00001685	protein_coding	K10B3.7	0.184094	0.546436
gpd-4	WBGene00001686	protein_coding	F33H1.2	1.47077	5.94e-05
gpn-1	WBGene00001687	protein_coding	F59D12.4	-1.04509	0.00377138
gpr-1	WBGene00001688	protein_coding	F22B7.13	0.672612	0.111106
gpr-2	WBGene00001689	protein_coding	C38C10.4	1.01708	0.0068627
grd-1	WBGene00001690	protein_coding	R08B4.1	-0.538454	0.212063
grd-2	WBGene00001691	protein_coding	F46B3.5	0.0300226	NA
grd-3	WBGene00001692	protein_coding	W05E7.1	-0.322354	0.109604
grd-4	WBGene00001693	protein_coding	T01B10.1	-0.271619	0.578998
grd-5	WBGene00001694	protein_coding	F41E6.2	0.539361	0.00419687
grd-6	WBGene00001695	protein_coding	T18H9.1	-0.573846	0.181905
grd-7	WBGene00001696	protein_coding	F46H5.6	0.739473	0.0778032
grd-8	WBGene00001697	protein_coding	C37C3.4	0.289125	0.573128
grd-9	WBGene00001698	protein_coding	C04E6.6	0.255144	0.62025
grd-10	WBGene00001699	protein_coding	F09D12.1	-0.397049	0.0331586
grd-11	WBGene00001700	protein_coding	K02E2.2	0.0799588	0.885829
grd-12	WBGene00001701	protein_coding	F02D8.2	0.179223	0.752024
grd-13	WBGene00001702	protein_coding	W05E7.3	-0.311512	0.053633
grd-14	WBGene00001703	protein_coding	T01B10.2	0.268524	0.571185
grd-15	WBGene00001704	protein_coding	Y87G2A.15	0.178061	0.754428
grd-16	WBGene00001705	protein_coding	Y69A2AL.1	0.517071	0.234676
grh-1	WBGene00001707	protein_coding	Y48G8AR.1	-0.172763	0.461134
grk-1	WBGene00001708	protein_coding	F19C6.1	-0.0665901	0.733767
grk-2	WBGene00001709	protein_coding	W02B3.2	-0.239006	0.333143
grl-1	WBGene00001710	protein_coding	C24G6.7	0.294185	0.558565
grl-2	WBGene00001711	protein_coding	T16G1.8	-0.059551	0.92716
grl-3	WBGene00001712	protein_coding	K03B8.7	-0.0588755	0.923181
grl-4	WBGene00001713	protein_coding	F42C5.7	0.846964	0.00141217
grl-5	WBGene00001714	protein_coding	Y47D7A.5	-0.0277646	0.949469
grl-6	WBGene00001715	protein_coding	K10C2.5	-0.847683	0.0366767
grl-7	WBGene00001716	protein_coding	T02E9.2	-0.134953	0.819239
grl-8	WBGene00001717	protein_coding	ZC487.5	-0.432756	0.272715
grl-9	WBGene00001718	protein_coding	ZC487.4	0.464918	0.308664
grl-10	WBGene00001719	protein_coding	C26F1.5	0.0568106	0.912588
grl-11	WBGene00001720	protein_coding	ZK512.9	-0.0357869	0.9287
grl-12	WBGene00001721	protein_coding	F28A12.2	-0.21122	0.695047
grl-13	WBGene00001722	protein_coding	F32D1.4	-0.143734	0.80756
grl-14	WBGene00001723	protein_coding	T03D8.4	-0.199009	0.471968
grl-15	WBGene00001724	protein_coding	Y75B8A.20	0.425682	0.366247
grl-16	WBGene00001725	protein_coding	Y65B4BR.6	0.729815	0.0823221
grl-17	WBGene00001726	protein_coding	C56A3.1	0.450771	0.0975382
grl-18	WBGene00001727	protein_coding	T05C3.4	0.539438	0.217777
grl-19	WBGene00001728	protein_coding	R02D3.6	-0.14592	0.646974
grl-20	WBGene00001729	protein_coding	C23H5.9	-0.620802	0.126557
grl-21	WBGene00001730	protein_coding	ZC168.5	0.298363	0.525894
grl-22	WBGene00001731	protein_coding	W03A5.3	0.0243904	NA
grl-23	WBGene00001732	protein_coding	E02A10.2	0.00249027	0.995965
grl-24	WBGene00001733	protein_coding	F11E6.2	0.209234	0.69958
grl-25	WBGene00001734	protein_coding	ZK643.8	-0.0799229	0.834132
grl-26	WBGene00001735	protein_coding	K02D7.6	-0.312851	0.421314
grl-27	WBGene00001736	protein_coding	F40C5.3	0.141832	0.71654
grl-28	WBGene00001737	protein_coding	T24A6.15	-0.248712	0.62945
grl-29	WBGene00001738	protein_coding	T24A6.18	0.0452695	0.924403
grl-30	WBGene00001739	protein_coding	T24A6.3	0.0123611	NA
gro-1	WBGene00001740	protein_coding	ZC395.6	0.127755	0.715625
grp-1	WBGene00001743	protein_coding	K06H7.4	0.260892	0.234913
gars-1	WBGene00001744	protein_coding	T10F2.1	0.145076	0.373301
gsa-1	WBGene00001745	protein_coding	R06A10.2	0.0246571	0.927763
gsk-3	WBGene00001746	protein_coding	Y18D10A.5	0.0778269	0.596563
gsp-1	WBGene00001747	protein_coding	F29F11.6	-0.0115549	0.971616
gsp-2	WBGene00001748	protein_coding	F56C9.1	-0.0961364	0.489667
gst-1	WBGene00001749	protein_coding	R107.7	0.147671	0.598926
gst-2	WBGene00001750	protein_coding	K08F4.6	-0.892341	0.00153605
gst-3	WBGene00001751	protein_coding	K08F4.11	-0.310781	0.194922
gst-4	WBGene00001752	protein_coding	K08F4.7	-0.319338	0.287141
gst-5	WBGene00001753	protein_coding	R03D7.6	-0.84361	0.00046601
gst-6	WBGene00001754	protein_coding	F11G11.3	-0.242704	0.387915
gst-7	WBGene00001755	protein_coding	F11G11.2	-0.15384	0.656352
gst-8	WBGene00001756	protein_coding	F11G11.1	-0.966966	0.0109203
gst-9	WBGene00001757	protein_coding	R05F9.5	0.515422	0.193551
gst-10	WBGene00001758	protein_coding	Y45G12C.2	-0.860484	0.00966779
gst-11	WBGene00001759	protein_coding	R11G1.3	-0.466027	0.173274
gst-12	WBGene00001760	protein_coding	F37B1.2	-0.803807	0.0425451
gst-13	WBGene00001761	protein_coding	T26C5.1	-0.866033	0.00019033
gst-14	WBGene00001762	protein_coding	F37B1.3	-0.13209	0.81692
gst-15	WBGene00001763	protein_coding	F37B1.4	0.364094	0.443391
gst-16	WBGene00001764	protein_coding	F37B1.5	-0.464293	0.255473
gst-17	WBGene00001765	protein_coding	F37B1.6	0.122488	NA
gst-18	WBGene00001766	protein_coding	F37B1.7	0.102483	0.760604
gst-19	WBGene00001767	protein_coding	F37B1.8	-0.0854715	0.86343
gst-20	WBGene00001768	protein_coding	Y48E1B.10	-0.379712	0.295952
gst-21	WBGene00001769	protein_coding	ZK697.6	-0.225513	0.63126
gst-22	WBGene00001770	protein_coding	F21H7.1	1.00992	0.00011433
gst-23	WBGene00001771	protein_coding	T28A11.11	-0.285206	0.474759
gst-24	WBGene00001772	protein_coding	F37B1.1	0.724629	0.0254552
gst-25	WBGene00001773	protein_coding	F37F2.3	-0.969064	0.00908897
gst-26	WBGene00001774	protein_coding	Y53F4B.29	-1.0231	9.05e-05
gst-27	WBGene00001775	protein_coding	Y53F4B.30	-1.20088	1.38e-11
gst-28	WBGene00001776	protein_coding	Y53F4B.31	-0.863135	0.00024443
gst-29	WBGene00001777	protein_coding	Y53F4B.32	0.197086	0.704856
gst-30	WBGene00001778	protein_coding	ZK546.11	-0.470273	0.285464
gst-31	WBGene00001779	protein_coding	Y53F4B.35	0.111717	0.844054
gst-32	WBGene00001780	protein_coding	Y53F4B.37	-0.223327	0.644793
gst-33	WBGene00001781	protein_coding	C02A12.1	-0.856157	0.0167004
gst-34	WBGene00001782	protein_coding	Y1H11.1	0.240239	0.650669
gst-35	WBGene00001783	protein_coding	Y1H11.2	-0.37656	0.350139
gst-36	WBGene00001784	protein_coding	R07B1.4	0.175461	0.513179
gst-37	WBGene00001785	protein_coding	Y32G9A.1	0.109845	NA
gst-38	WBGene00001786	protein_coding	F35E8.8	-0.83122	0.00592392
gst-39	WBGene00001787	protein_coding	Y53F4B.33	0.0798434	0.821502
gst-40	WBGene00001788	protein_coding	F56B3.10	-0.20337	0.505821
gst-41	WBGene00001789	protein_coding	R13D7.7	-0.627559	0.0873574
gst-42	WBGene00001790	protein_coding	D1053.1	-0.395107	0.136394
gst-43	WBGene00001791	protein_coding	Y71F9AL.5	0.0419788	0.909137
gst-44	WBGene00001792	protein_coding	F13A7.10	-0.27053	0.597189
gsy-1	WBGene00001793	protein_coding	Y46G5A.31	-0.0342416	0.918949
gta-1	WBGene00001794	protein_coding	K04D7.3	-0.337637	0.00398663
gtl-1	WBGene00001795	protein_coding	C05C12.3	-0.0952449	0.72356
gtl-2	WBGene00001796	protein_coding	F54D1.5	0.306387	0.305761
lite-1	WBGene00001803	protein_coding	C14F11.3	-0.512526	0.0425451
gur-3	WBGene00001804	protein_coding	ZC504.5	-0.314848	0.458732
gur-4	WBGene00001805	protein_coding	K09E4.5	0.852473	2.58e-05
gur-5	WBGene00001806	protein_coding	ZK622.2	-0.0594418	0.924048
gut-2	WBGene00001808	protein_coding	T10G3.6	0.202642	0.386205
haf-1	WBGene00001811	protein_coding	C30H6.6	-0.02922	0.941638
haf-2	WBGene00001812	protein_coding	F43E2.4	0.977309	8.6e-07
haf-3	WBGene00001813	protein_coding	F57A10.3	0.0730424	0.739884
haf-4	WBGene00001814	protein_coding	W04C9.1	-0.315235	0.243593
hmt-1	WBGene00001815	protein_coding	W09D6.6	0.396104	0.117472
haf-6	WBGene00001816	protein_coding	Y48G8AL.11	-0.0803597	0.760616
haf-7	WBGene00001817	protein_coding	Y50E8A.16	0.509302	0.00850768
haf-8	WBGene00001818	protein_coding	Y57G11C.1	-0.0791433	NA
haf-9	WBGene00001819	protein_coding	ZK484.2	-0.0639382	0.851
ham-1	WBGene00001820	protein_coding	F53B2.6	-0.234706	0.423632
ham-2	WBGene00001821	protein_coding	C07A12.1	0.077187	0.835591
hap-1	WBGene00001823	protein_coding	ZC395.7	-0.103678	0.717435
hbl-1	WBGene00001824	protein_coding	F13D11.2	0.159509	0.580098
hcf-1	WBGene00001827	protein_coding	C46A5.9	0.640778	0.00050211
hch-1	WBGene00001828	protein_coding	F40E10.1	0.0743983	0.878325
hcp-1	WBGene00001829	protein_coding	ZK1055.1	1.26336	0.00069736
hcp-2	WBGene00001830	protein_coding	T06E4.1	1.34188	0.00014536
hcp-3	WBGene00001831	protein_coding	F58A4.3	1.03848	0.00404155
hcp-4	WBGene00001832	protein_coding	T03F1.9	0.94011	0.00342419
hcp-6	WBGene00001833	protein_coding	Y110A7A.1	1.19071	0.00077134
hda-1	WBGene00001834	protein_coding	C53A5.3	0.197823	0.423523
hda-2	WBGene00001835	protein_coding	C08B11.2	0.170637	0.402437
hda-3	WBGene00001836	protein_coding	R06C1.1	0.188113	0.315553
hda-4	WBGene00001837	protein_coding	C10E2.3	-0.146593	0.45291
hda-10	WBGene00001838	protein_coding	Y51H1A.5	0.184073	0.440083
hdl-1	WBGene00001839	protein_coding	ZK829.2	0.349616	0.101668
hel-1	WBGene00001840	protein_coding	C26D10.2	0.547597	0.00620007
hen-1	WBGene00001841	protein_coding	C36B7.7	-0.482608	0.290149
her-1	WBGene00001842	protein_coding	ZK287.8	0.862635	0.0198217
hgo-1	WBGene00001843	protein_coding	W06D4.1	-0.100053	0.778252
hid-1	WBGene00001844	protein_coding	K02E10.2	-0.333451	0.0164356
hif-1	WBGene00001851	protein_coding	F38A6.3	-0.524216	0.00242271
hil-1	WBGene00001852	protein_coding	C30G7.1	0.37664	0.287141
hil-2	WBGene00001853	protein_coding	Y73B6BL.9	1.22206	3.87e-06
hil-3	WBGene00001854	protein_coding	F22F1.1	1.14302	1.55e-06
hil-4	WBGene00001855	protein_coding	C18G1.5	1.07509	0.00502447
hil-5	WBGene00001856	protein_coding	B0414.3	1.90939	1.53e-08
hil-6	WBGene00001857	protein_coding	F59A7.4	1.82738	4.19e-07
hil-7	WBGene00001858	protein_coding	C01B10.5	-0.0994726	0.780665
hil-8	WBGene00001859	protein_coding	T05E8.2	0.11383	0.852354
him-1	WBGene00001860	protein_coding	F28B3.7	0.232565	0.173418
him-3	WBGene00001862	protein_coding	ZK381.1	0.674036	0.0644595
him-4	WBGene00001863	protein_coding	F15G9.4	0.399606	0.218555
him-5	WBGene00001864	protein_coding	D1086.4	-0.21285	0.455098
him-6	WBGene00001865	protein_coding	T04A11.6	0.74192	0.0140919
him-8	WBGene00001867	protein_coding	T07G12.12	0.580851	0.0832027
him-10	WBGene00001869	protein_coding	R12B2.4	1.13573	0.0004177
him-14	WBGene00001872	protein_coding	ZK1127.11	1.4576	9.39e-05
him-17	WBGene00001874	protein_coding	T09E8.2	0.350351	0.0377082
his-1	WBGene00001875	protein_coding	T10C6.14	0.954138	0.00113834
his-2	WBGene00001876	protein_coding	T10C6.13	0.880624	0.00445681
his-3	WBGene00001877	protein_coding	T10C6.12	1.10268	0.00043232
his-4	WBGene00001878	protein_coding	T10C6.11	1.14945	0.00026732
his-5	WBGene00001879	protein_coding	F45F2.3	0.911107	0.00252158
his-6	WBGene00001880	protein_coding	F45F2.13	0.824984	0.00398783
his-7	WBGene00001881	protein_coding	F45F2.4	0.520358	0.0969765
his-8	WBGene00001882	protein_coding	F45F2.12	0.833735	0.0042229
his-9	WBGene00001883	protein_coding	ZK131.3	1.25022	5.16e-05
his-10	WBGene00001884	protein_coding	ZK131.4	1.03265	0.00106908
his-11	WBGene00001885	protein_coding	ZK131.5	0.934893	0.00146843
his-12	WBGene00001886	protein_coding	ZK131.6	1.21606	0.00019191
his-13	WBGene00001887	protein_coding	ZK131.7	1.11197	0.00035771
his-14	WBGene00001888	protein_coding	ZK131.8	1.01221	0.00080164
his-15	WBGene00001889	protein_coding	ZK131.9	0.972717	0.00049154
his-16	WBGene00001890	protein_coding	ZK131.10	1.22568	0.0001127
his-17	WBGene00001891	protein_coding	K06C4.5	0.683111	0.017787
his-18	WBGene00001892	protein_coding	K06C4.10	0.761063	0.015883
his-19	WBGene00001893	protein_coding	K06C4.11	0.794119	0.00680682
his-20	WBGene00001894	protein_coding	K06C4.4	0.828492	0.00219964
his-21	WBGene00001895	protein_coding	K06C4.3	0.677167	0.0261698
his-22	WBGene00001896	protein_coding	K06C4.12	0.914925	0.00060264
his-24	WBGene00001898	protein_coding	M163.3	1.07372	7.62e-05
his-25	WBGene00001899	protein_coding	ZK131.2	1.14027	0.00015704
his-26	WBGene00001900	protein_coding	ZK131.1	1.21027	1.59e-05
his-27	WBGene00001901	protein_coding	K06C4.13	0.669596	0.0269922
his-28	WBGene00001902	protein_coding	K06C4.2	1.02684	0.00455562
his-29	WBGene00001903	protein_coding	F35H10.11	1.25273	0.00081909
his-30	WBGene00001904	protein_coding	F35H10.1	0.839607	0.0190807
his-31	WBGene00001905	protein_coding	F17E9.12	0.763093	0.0188138
his-32	WBGene00001906	protein_coding	F17E9.10	1.40007	0.00015378
his-33	WBGene00001907	protein_coding	F17E9.13	0.864395	0.0151916
his-34	WBGene00001908	protein_coding	F17E9.9	1.16446	0.00167141
his-35	WBGene00001909	protein_coding	C50F4.13	0.148636	0.435727
C50F4.6	WBGene00001910	protein_coding	C50F4.6	0.376435	0.0883706
his-37	WBGene00001911	protein_coding	C50F4.7	0.151259	0.59924
his-38	WBGene00001912	protein_coding	K03A1.6	1.04908	0.00592606
his-39	WBGene00001913	protein_coding	F45F2.2	0.569891	0.19616
his-40	WBGene00001914	protein_coding	K03A1.1	0.869997	0.0252265
his-41	WBGene00001915	protein_coding	C50F4.5	0.29645	0.0954331
his-42	WBGene00001916	protein_coding	F08G2.3	0.988171	0.00247104
his-43	WBGene00001917	protein_coding	F08G2.2	1.07542	0.0012642
his-44	WBGene00001918	protein_coding	F08G2.1	0.964215	0.00083376
his-45	WBGene00001919	protein_coding	B0035.10	1.27443	0.00066518
his-46	WBGene00001920	protein_coding	B0035.9	1.18116	0.00157192
his-47	WBGene00001921	protein_coding	B0035.7	1.09395	0.00396842
his-48	WBGene00001922	protein_coding	B0035.8	1.0901	0.00376522
his-49	WBGene00001923	protein_coding	F07B7.5	0.740297	0.0118917
his-50	WBGene00001924	protein_coding	F07B7.9	0.924228	0.00995062
his-51	WBGene00001925	protein_coding	F07B7.10	0.797899	0.00765252
his-52	WBGene00001926	protein_coding	F07B7.4	0.797684	0.00437925
his-53	WBGene00001927	protein_coding	F07B7.3	0.547215	0.098699
his-54	WBGene00001928	protein_coding	F07B7.11	0.877686	0.00048953
his-55	WBGene00001929	protein_coding	F54E12.1	1.2928	0.00049373
his-56	WBGene00001930	protein_coding	F54E12.3	1.36208	5.54e-05
his-57	WBGene00001931	protein_coding	F54E12.5	1.13789	0.00208978
his-58	WBGene00001932	protein_coding	F54E12.4	1.11775	0.00266506
his-59	WBGene00001933	protein_coding	F55G1.2	1.34799	0.00019064
his-60	WBGene00001934	protein_coding	F55G1.11	1.41792	1.62e-05
his-61	WBGene00001935	protein_coding	F55G1.10	1.23578	0.00106448
his-62	WBGene00001936	protein_coding	F55G1.3	1.38317	0.00010327
his-63	WBGene00001937	protein_coding	F22B3.2	1.30894	0.00040868
his-64	WBGene00001938	protein_coding	F22B3.1	1.24265	0.00098952
his-65	WBGene00001939	protein_coding	H02I12.7	1.08188	0.00469499
his-66	WBGene00001940	protein_coding	H02I12.6	1.11331	0.0029072
his-67	WBGene00001941	protein_coding	T23D8.5	1.18801	0.00067119
his-68	WBGene00001942	protein_coding	T23D8.6	1.01286	0.00726174
his-69	WBGene00001943	protein_coding	E03A3.3	0.309475	0.481107
his-70	WBGene00001944	protein_coding	E03A3.4	0.0285643	0.929329
his-71	WBGene00001945	protein_coding	F45E1.6	-0.00966503	0.974647
his-72	WBGene00001946	protein_coding	Y49E10.6	0.0348395	0.888363
his-73	WBGene00001947	protein_coding	W09H1.2	0.995137	0.00861143
hlh-1	WBGene00001948	protein_coding	B0304.1	-0.188822	0.289426
hlh-2	WBGene00001949	protein_coding	M05B5.5	-0.244357	0.252294
hlh-3	WBGene00001950	protein_coding	T24B8.6	-0.00661085	0.993189
hlh-4	WBGene00001951	protein_coding	T05G5.2	-0.651332	0.116303
hlh-6	WBGene00001952	protein_coding	T15H9.3	-0.658315	0.0970854
hlh-8	WBGene00001953	protein_coding	C02B8.4	-0.397995	0.230412
hlh-10	WBGene00001954	protein_coding	ZK682.4	-0.476784	0.232562
hlh-11	WBGene00001955	protein_coding	F58A4.7	-0.178427	0.385682
hlh-12	WBGene00001956	protein_coding	C28C12.8	0.202338	0.663313
hlh-13	WBGene00001957	protein_coding	F48D6.3	-0.0204228	0.976033
hlh-14	WBGene00001958	protein_coding	C18A3.8	0.327647	0.496235
hlh-15	WBGene00001959	protein_coding	C43H6.8	-0.3818	0.420905
hlh-16	WBGene00001960	protein_coding	DY3.3	-0.154482	0.723698
hlh-17	WBGene00001961	protein_coding	F38C2.2	-0.155206	0.787168
hlh-19	WBGene00001962	protein_coding	F57C12.3	0.389287	0.34924
btb-1	WBGene00001963	protein_coding	F40G9.4	0.193924	0.668591
hlh-25	WBGene00001964	protein_coding	C17C3.7	-0.0118868	NA
hlh-26	WBGene00001965	protein_coding	C17C3.8	0	NA
hlh-27	WBGene00001966	protein_coding	C17C3.10	-0.0118868	NA
hlh-28	WBGene00001967	protein_coding	F31A3.2	0.0123611	NA
hlh-29	WBGene00001968	protein_coding	F31A3.4	-0.0634651	NA
hmg-1.1	WBGene00001971	protein_coding	Y48B6A.14	0.383562	0.10055
hmg-1.2	WBGene00001972	protein_coding	F47D12.4	-0.343475	0.010319
hmg-3	WBGene00001973	protein_coding	C32F10.5	1.57366	7.84e-06
hmg-4	WBGene00001974	protein_coding	T20B12.8	0.466368	0.0129858
hmg-5	WBGene00001975	protein_coding	F45E4.9	0.133331	0.666373
hmg-11	WBGene00001976	protein_coding	T05A7.4	0.229315	0.25486
hmg-12	WBGene00001977	protein_coding	Y17G7A.1	1.14572	0.00069677
hmp-1	WBGene00001978	protein_coding	R13H4.4	0.065827	0.721062
hmp-2	WBGene00001979	protein_coding	K05C4.6	0.358918	0.0199495
hmr-1	WBGene00001980	protein_coding	W02B9.1	0.309817	0.0153185
hnd-1	WBGene00001981	protein_coding	C44C10.8	0.127461	0.630195
hoe-1	WBGene00001983	protein_coding	E04A4.4	0.722015	0.00059987
hog-1	WBGene00001984	protein_coding	W06B11.4	0.575939	0.0726099
hop-1	WBGene00001985	protein_coding	C18E3.8	0.944155	0.0131613
hot-1	WBGene00001986	protein_coding	F43D2.4	-0.354275	0.0937926
hot-2	WBGene00001987	protein_coding	Y39B6A.48	-0.321665	0.190545
hot-3	WBGene00001988	protein_coding	W02B8.5	-0.593559	0.0106739
hot-4	WBGene00001989	protein_coding	T12A2.16	-0.562167	0.010116
hot-5	WBGene00001990	protein_coding	K07A12.6	-0.7148	0.00181078
hot-6	WBGene00001991	protein_coding	C13G3.2	-0.450394	0.0905724
hot-7	WBGene00001992	protein_coding	Y48B6A.9	-0.0772822	0.866093
hpd-1	WBGene00001993	protein_coding	T21C12.2	-0.758863	0.00046382
hpk-1	WBGene00001994	protein_coding	F20B6.8	0.112478	0.737838
hpl-1	WBGene00001995	protein_coding	K08H2.6	-0.0613239	0.843705
hpl-2	WBGene00001996	protein_coding	K01G5.2	0.524286	0.0259095
hpr-9	WBGene00001997	protein_coding	Y39A1A.23	0.494342	0.163735
hpr-17	WBGene00001998	protein_coding	F32A11.2	0.882215	0.028753
hrp-1	WBGene00001999	protein_coding	F42A6.7	0.820233	2.4e-06
hrp-2	WBGene00002000	protein_coding	F58D5.1	0.542457	0.00062207
hars-1	WBGene00002001	protein_coding	T11G6.1	0.14563	0.483577
hsb-1	WBGene00002002	protein_coding	K08E7.2	0.15277	0.551511
hse-5	WBGene00002003	protein_coding	B0285.5	0.367483	0.128193
hsf-1	WBGene00002004	protein_coding	Y53C10A.12	-0.0222223	0.916449
hsp-1	WBGene00002005	protein_coding	F26D10.3	0.610121	0.0399287
hsp-3	WBGene00002007	protein_coding	C15H9.6	-0.244961	0.369663
hsp-4	WBGene00002008	protein_coding	F43E2.8	-0.704762	0.0258197
hsp-6	WBGene00002010	protein_coding	C37H5.8	0.160423	0.497446
hsp-12.2	WBGene00002011	protein_coding	C14B9.1	-0.517921	0.220887
hsp-12.3	WBGene00002012	protein_coding	F38E11.1	0.347101	0.481588
hsp-12.6	WBGene00002013	protein_coding	F38E11.2	0.483605	0.290611
hsp-16.1	WBGene00002015	protein_coding	T27E4.8	1.2016	0.00035557
hsp-16.2	WBGene00002016	protein_coding	Y46H3A.3	1.14796	0.00032654
hsp-16.11	WBGene00002017	protein_coding	T27E4.2	1.19142	0.00037257
hsp-16.41	WBGene00002018	protein_coding	Y46H3A.2	1.15523	0.00037542
hsp-16.48	WBGene00002019	protein_coding	T27E4.3	1.34814	7.59e-05
hsp-16.49	WBGene00002020	protein_coding	T27E4.9	1.28244	0.00013895
hsp-17	WBGene00002021	protein_coding	F52E1.7	-0.157382	0.662061
hsp-25	WBGene00002023	protein_coding	C09B8.6	-0.486529	0.00353527
hsp-43	WBGene00002024	protein_coding	C14F11.5	-0.507974	0.110376
hsp-60	WBGene00002025	protein_coding	Y22D7AL.5	-0.164992	0.504901
hsp-70	WBGene00002026	protein_coding	C12C8.1	1.42745	2.37e-06
hsr-9	WBGene00002027	protein_coding	T05F1.6	0.57631	0.00188988
hst-1	WBGene00002028	protein_coding	F08B4.6	0.204006	0.380428
hst-2	WBGene00002029	protein_coding	C34F6.4	-0.226769	0.339781
hst-3.1	WBGene00002030	protein_coding	F40H3.5	-0.527981	0.0504785
hst-6	WBGene00002031	protein_coding	Y34B4A.3	-0.105858	0.713796
htp-1	WBGene00002032	protein_coding	F41H10.10	0.927481	0.0203147
htp-2	WBGene00002033	protein_coding	Y73B6BL.2	0.955722	0.0153366
htp-3	WBGene00002034	protein_coding	F57C9.5	1.28397	0.00064957
hum-1	WBGene00002035	protein_coding	F29D10.4	0.0724133	0.603513
hum-2	WBGene00002036	protein_coding	F36D4.3	0.246034	0.0609932
hum-4	WBGene00002037	protein_coding	F46C3.3	-0.454461	0.0133706
hum-5	WBGene00002038	protein_coding	T02C12.1	-0.340574	0.0533739
hum-6	WBGene00002039	protein_coding	T10H10.1	-0.118668	0.639915
hum-7	WBGene00002040	protein_coding	F56A6.2	0.11736	0.709512
hum-8	WBGene00002041	protein_coding	Y66H1A.6	-0.249122	0.212499
hus-1	WBGene00002042	protein_coding	H26D21.1	0.764319	0.0252294
hyl-1	WBGene00002043	protein_coding	C09G4.1	1.06063	3.8e-06
hyl-2	WBGene00002044	protein_coding	K02G10.6	0.0290663	0.912547
icd-1	WBGene00002045	protein_coding	C56C10.8	0.0410602	0.791588
icln-1	WBGene00002046	protein_coding	C01F6.8	-0.0420979	0.861863
icp-1	WBGene00002047	protein_coding	Y39G10AR.13	1.38385	2.1e-05
ida-1	WBGene00002048	protein_coding	B0244.2	-0.00225039	0.997927
ifa-1	WBGene00002050	protein_coding	F38B2.1	-0.716066	0.0317136
ifa-3	WBGene00002051	protein_coding	F52E10.5	-0.154406	0.789622
ifa-4	WBGene00002052	protein_coding	K05B2.3	-0.349086	0.0633518
ifb-1	WBGene00002053	protein_coding	F10C1.2	-0.549729	0.0148831
ifb-2	WBGene00002054	protein_coding	F10C1.7	-0.775101	3.33e-07
ifc-1	WBGene00002055	protein_coding	F37B4.2	-2.22507	1.79e-38
ifc-2	WBGene00002056	protein_coding	M6.1	-0.376472	0.0946421
ifd-1	WBGene00002057	protein_coding	R04E5.10	-1.0201	5.74e-10
ifd-2	WBGene00002058	protein_coding	F25E2.4	0.0134664	0.978712
ife-1	WBGene00002059	protein_coding	F53A2.6	0.362889	0.0491084
ife-2	WBGene00002060	protein_coding	R04A9.4	-0.0429636	0.873115
ife-3	WBGene00002061	protein_coding	B0348.6	0.804927	0.00058589
ife-4	WBGene00002062	protein_coding	C05D9.5	-0.130591	0.716658
ife-5	WBGene00002063	protein_coding	Y57A10A.30	0.668735	0.0267717
iff-1	WBGene00002064	protein_coding	T05G5.10	1.27774	0.00077597
iff-2	WBGene00002065	protein_coding	F54C9.1	-0.0848816	0.668944
ifg-1	WBGene00002066	protein_coding	M110.4	0.270383	0.138068
ifp-1	WBGene00002067	protein_coding	C43C3.1	-0.89035	4.72e-08
ify-1	WBGene00002068	protein_coding	C27A2.3	1.22712	0.00100059
ikb-1	WBGene00002069	protein_coding	C04F12.3	-0.1518	0.609608
ile-1	WBGene00002070	protein_coding	K07A1.8	0.0746163	0.786428
ile-2	WBGene00002071	protein_coding	T04G9.3	0.154485	0.491102
ima-1	WBGene00002072	protein_coding	T19B10.7	0.172194	0.428256
ima-2	WBGene00002073	protein_coding	F26B1.3	1.35268	0.00034217
ima-3	WBGene00002074	protein_coding	F32E10.4	0.0722265	0.734859
imb-1	WBGene00002075	protein_coding	F28B3.8	0.323494	0.0862746
imb-2	WBGene00002076	protein_coding	R06A4.4	0.281073	0.0494871
imb-3	WBGene00002077	protein_coding	C53D5.6	0.340406	0.128378
xpo-1	WBGene00002078	protein_coding	ZK742.1	0.0253166	0.939986
xpo-2	WBGene00002079	protein_coding	Y48G1A.5	0.753908	0.00307504
xpo-3	WBGene00002080	protein_coding	C49H3.10	0.163043	0.511551
ina-1	WBGene00002081	protein_coding	F54G8.3	0.211561	0.373466
inf-1	WBGene00002083	protein_coding	F57B9.6	0.172597	0.507654
ins-1	WBGene00002084	protein_coding	F13B12.5	-0.341692	0.293684
ins-2	WBGene00002085	protein_coding	ZK75.2	0.365516	0.363856
ins-3	WBGene00002086	protein_coding	ZK75.3	-0.319714	0.398369
ins-4	WBGene00002087	protein_coding	ZK75.1	-0.30821	0.53425
ins-5	WBGene00002088	protein_coding	ZK84.3	-0.418117	0.334823
ins-6	WBGene00002089	protein_coding	ZK84.6	-0.417934	0.303284
ins-7	WBGene00002090	protein_coding	ZK1251.2	0.144369	0.713923
ins-8	WBGene00002091	protein_coding	ZK1251.11	-0.0279894	NA
ins-9	WBGene00002092	protein_coding	C06E2.8	0.00101106	NA
ins-10	WBGene00002093	protein_coding	T08G5.12	-0.0230634	0.967487
ins-11	WBGene00002094	protein_coding	C17C3.4	-0.40463	0.395881
ins-12	WBGene00002095	protein_coding	C17C3.19	0.0661413	0.859725
ins-13	WBGene00002096	protein_coding	C17C3.18	0.155337	0.791038
ins-14	WBGene00002097	protein_coding	F41G3.16	-1.26005	0.00033311
ins-15	WBGene00002098	protein_coding	F41G3.17	-0.104515	0.846054
ins-16	WBGene00002099	protein_coding	Y39A3A.5	0.128747	0.662622
ins-17	WBGene00002100	protein_coding	F56F3.6	-0.336037	0.289657
ins-18	WBGene00002101	protein_coding	T28B8.2	-0.771273	1.95e-05
ins-19	WBGene00002102	protein_coding	T10D4.13	0.229216	0.461725
ins-20	WBGene00002103	protein_coding	ZK84.7	0.67261	0.057474
ins-21	WBGene00002104	protein_coding	M04D8.1	-0.0428056	0.947253
ins-22	WBGene00002105	protein_coding	M04D8.2	-0.276299	0.57538
ins-23	WBGene00002106	protein_coding	M04D8.3	0.541743	0.00970815
ins-24	WBGene00002107	protein_coding	ZC334.3	-0.620181	0.0626523
ins-25	WBGene00002108	protein_coding	ZC334.8	0.281258	0.577376
ins-26	WBGene00002109	protein_coding	ZC334.1	0.37812	0.434517
ins-27	WBGene00002110	protein_coding	ZC334.11	-0.374391	0.195996
ins-28	WBGene00002111	protein_coding	ZC334.9	0.116727	0.845265
ins-29	WBGene00002112	protein_coding	ZC334.10	0.0853337	0.891607
ins-30	WBGene00002113	protein_coding	ZC334.2	-0.185187	0.664971
ins-31	WBGene00002114	protein_coding	T10D4.4	0.185259	0.73346
ins-32	WBGene00002115	protein_coding	Y8A9A.6	0.0761802	0.85019
ins-33	WBGene00002116	protein_coding	W09C5.4	0.262712	0.547808
ins-34	WBGene00002117	protein_coding	F52B11.6	-0.000790496	0.99939
ins-35	WBGene00002118	protein_coding	K02E2.4	-0.742248	0.0721263
ins-36	WBGene00002119	protein_coding	Y53H1A.4	0.0104547	0.98966
ins-37	WBGene00002120	protein_coding	F08G2.6	0.304841	0.547606
ins-38	WBGene00002121	protein_coding	C17C3.20	0.0123611	NA
inx-1	WBGene00002123	protein_coding	C16E9.4	-0.140641	0.6592
inx-2	WBGene00002124	protein_coding	F08G12.10	0.125937	0.819412
inx-3	WBGene00002125	protein_coding	F22F4.2	0.236621	0.615133
inx-5	WBGene00002127	protein_coding	R09F10.4	-0.290339	0.109475
inx-6	WBGene00002128	protein_coding	C36H8.2	-0.738267	0.0359876
inx-7	WBGene00002129	protein_coding	K02B2.4	-0.278872	0.184186
inx-8	WBGene00002130	protein_coding	ZK792.2	1.58149	1.08e-05
inx-9	WBGene00002131	protein_coding	ZK792.3	1.26329	0.00072668
inx-10	WBGene00002132	protein_coding	T18H9.5	-0.45563	0.0291573
inx-11	WBGene00002133	protein_coding	W04D2.3	-0.475872	0.0386796
inx-12	WBGene00002134	protein_coding	ZK770.3	-0.415153	0.00716914
inx-13	WBGene00002135	protein_coding	Y8G1A.2	-0.582038	0.0003612
inx-14	WBGene00002136	protein_coding	F07A5.1	0.812274	0.00510626
inx-15	WBGene00002137	protein_coding	R12E2.9	-0.163391	0.523123
inx-16	WBGene00002138	protein_coding	R12E2.5	-0.0491155	0.883154
inx-17	WBGene00002139	protein_coding	R12E2.4	-0.172085	0.476794
inx-18	WBGene00002140	protein_coding	C18H7.2	0.093031	0.710483
inx-19	WBGene00002141	protein_coding	T16H5.1	-0.349495	0.18149
inx-20	WBGene00002142	protein_coding	T23H4.1	-0.454437	0.0949066
inx-21	WBGene00002143	protein_coding	Y47G6A.1	1.11547	0.00321693
inx-22	WBGene00002144	protein_coding	Y47G6A.2	1.82235	4.91e-07
ipp-5	WBGene00002146	protein_coding	C09B8.1	-0.165634	0.401095
ire-1	WBGene00002147	protein_coding	C41C4.4	0.204064	0.139292
gon-14	WBGene00002148	protein_coding	F44C4.4	0.13636	0.405718
irk-1	WBGene00002149	protein_coding	R03E9.4	-0.568862	0.011965
irk-2	WBGene00002150	protein_coding	M02A10.2	-0.275875	0.207937
irk-3	WBGene00002151	protein_coding	K04G11.5	-0.493738	0.0236634
iars-1	WBGene00002152	protein_coding	R11A8.6	0.284131	0.144963
iars-2	WBGene00002153	protein_coding	C25A1.7	0.263543	0.229813
isp-1	WBGene00002162	protein_coding	F42G8.12	-0.177173	0.255652
ist-1	WBGene00002163	protein_coding	C54D1.3	-0.166756	0.554875
isw-1	WBGene00002169	protein_coding	F37A4.8	0.413732	0.0155052
itr-1	WBGene00002173	protein_coding	F33D4.2	-0.307931	0.0292966
itx-1	WBGene00002174	protein_coding	W03D8.6	-0.0320134	0.904232
jac-1	WBGene00002175	protein_coding	Y105C5B.21	-0.0660334	0.679474
jip-1	WBGene00002176	protein_coding	F56D12.4	-0.272965	0.268468
jkk-1	WBGene00002177	protein_coding	F35C8.3	-0.155015	0.584838
jnk-1	WBGene00002178	protein_coding	B0478.1	-0.560895	0.00066401
jph-1	WBGene00002179	protein_coding	T22C1.7	-0.066338	0.802963
jtr-1	WBGene00002180	protein_coding	Y77E11A.4	-0.0874692	0.817692
kal-1	WBGene00002181	protein_coding	K03D10.1	-0.271401	0.19055
kap-1	WBGene00002182	protein_coding	F08F8.3	-0.0352964	0.936672
kat-1	WBGene00002183	protein_coding	T02G5.8	-0.0416454	0.908239
kel-1	WBGene00002184	protein_coding	C47D12.7	0.270302	0.206539
kel-3	WBGene00002185	protein_coding	T27E9.4	-0.300437	0.00194362
kel-10	WBGene00002186	protein_coding	T16H12.6	0.53085	0.221647
kgb-1	WBGene00002187	protein_coding	T07A9.3	-0.413934	0.00034027
kgb-2	WBGene00002188	protein_coding	ZC416.4	0.482342	0.205403
kin-1	WBGene00002189	protein_coding	ZK909.2	-0.209708	0.162532
kin-2	WBGene00002190	protein_coding	R07E4.6	-0.0316846	0.919311
kin-3	WBGene00002191	protein_coding	B0205.7	0.00822394	0.964984
kin-4	WBGene00002192	protein_coding	C10C6.1	-0.0578009	0.811847
kin-5	WBGene00002193	protein_coding	T13H10.1	0.389476	0.0444268
kin-6	WBGene00002194	protein_coding	ZK20.2	0.266657	0.247236
kin-9	WBGene00002195	protein_coding	F08F1.1	-0.4853	0.114988
kin-10	WBGene00002196	protein_coding	T01G9.6	-0.0113788	0.972314
kin-14	WBGene00002198	protein_coding	F22D6.1	0.581554	0.125414
kin-15	WBGene00002199	protein_coding	M176.6	-0.772292	0.00031701
kin-16	WBGene00002200	protein_coding	M176.7	-0.373309	0.044008
kin-18	WBGene00002201	protein_coding	T17E9.1	0.173411	0.316969
kin-19	WBGene00002202	protein_coding	C03C10.1	0.123165	0.641235
kin-20	WBGene00002203	protein_coding	F46F2.2	-0.0383269	0.843705
kin-21	WBGene00002204	protein_coding	W08D2.8	0.0123611	NA
kin-23	WBGene00002205	protein_coding	W04G5.6	-0.235103	0.628996
kin-24	WBGene00002206	protein_coding	K07F5.4	0.122126	NA
sid-3	WBGene00002207	protein_coding	B0302.1	-0.0349033	0.916077
kin-26	WBGene00002208	protein_coding	T06C10.6	0.0123611	NA
kin-29	WBGene00002210	protein_coding	F58H12.1	-0.286066	0.0251801
kin-30	WBGene00002211	protein_coding	M01B2.1	-0.103316	0.854025
kin-31	WBGene00002212	protein_coding	B0523.1	0.474907	0.302497
kin-32	WBGene00002213	protein_coding	C30F8.4	-0.194574	0.210419
klc-1	WBGene00002214	protein_coding	M7.2	0.911734	0.00207236
klc-2	WBGene00002215	protein_coding	C18C4.10	-0.0946631	0.699134
klp-3	WBGene00002216	protein_coding	T09A5.2	-0.574882	0.00832723
klp-4	WBGene00002217	protein_coding	F56E3.3	-0.0159494	0.953363
klp-6	WBGene00002218	protein_coding	R144.1	-0.419579	0.00669056
klp-7	WBGene00002219	protein_coding	K11D9.1	0.577627	0.0159532
klp-8	WBGene00002220	protein_coding	C15C7.2	0.0177295	0.944876
klp-11	WBGene00002222	protein_coding	F20C5.2	-0.267217	0.0273162
klp-12	WBGene00002223	protein_coding	T01G1.1	0.198017	0.0753309
klp-13	WBGene00002224	protein_coding	F22F4.3	-0.338904	0.135353
klp-15	WBGene00002225	protein_coding	M01E11.6	1.14553	0.00178078
klp-16	WBGene00002226	protein_coding	C41G7.2	0.890813	0.00363008
klp-17	WBGene00002227	protein_coding	W02B12.7	-0.0381485	0.919324
klp-18	WBGene00002228	protein_coding	C06G3.2	0.88064	0.0269517
klp-19	WBGene00002229	protein_coding	Y43F4B.6	-0.182166	0.401954
klp-20	WBGene00002230	protein_coding	Y50D7A.6	0.151276	0.6068
knl-1	WBGene00002231	protein_coding	C02F5.1	1.12491	0.00077897
kpc-1	WBGene00002232	protein_coding	F11A6.1	-0.196632	0.211546
kqt-1	WBGene00002233	protein_coding	C25B8.1	-0.272233	0.363702
kqt-2	WBGene00002234	protein_coding	M60.5	-0.507801	0.0220853
kqt-3	WBGene00002235	protein_coding	Y54G9A.3	-0.369754	0.16011
kars-1	WBGene00002238	protein_coding	T02G5.9	0.407194	0.0987274
ksr-1	WBGene00002239	protein_coding	F13B9.5	-0.19316	0.351074
ksr-2	WBGene00002240	protein_coding	F58D5.4	0.180671	0.36813
kup-1	WBGene00002241	protein_coding	F10C2.2	0.0612406	0.761703
kvs-1	WBGene00002242	protein_coding	C53C9.3	-0.310858	0.197963
lad-2	WBGene00002243	protein_coding	Y54G2A.25	-0.60916	0.00417158
laf-1	WBGene00002244	protein_coding	Y71H2AM.19	0.377018	0.0645154
lag-1	WBGene00002245	protein_coding	K08B4.1	0.163528	0.28703
lag-2	WBGene00002246	protein_coding	Y73C8B.4	0.144575	0.806624
lam-1	WBGene00002247	protein_coding	W03F8.5	-0.0610052	0.749396
lam-3	WBGene00002248	protein_coding	T22A3.8	0.495102	0.267784
lap-1	WBGene00002249	protein_coding	ZK353.6	0.266621	0.0935132
lap-2	WBGene00002250	protein_coding	W07G4.4	0.490817	0.122092
lat-1	WBGene00002251	protein_coding	B0457.1	0.0427939	0.84852
lat-2	WBGene00002252	protein_coding	B0286.2	-0.0466399	0.937281
lbp-1	WBGene00002253	protein_coding	F40F4.3	-0.0390603	0.918091
lbp-2	WBGene00002254	protein_coding	F40F4.2	-0.247907	0.406063
lbp-3	WBGene00002255	protein_coding	F40F4.4	0.23197	0.533071
lbp-4	WBGene00002256	protein_coding	ZK742.5	0.105379	0.73346
lbp-5	WBGene00002257	protein_coding	W02D3.7	-0.216111	0.491666
lbp-6	WBGene00002258	protein_coding	W02D3.5	-0.501244	0.00644347
lbp-7	WBGene00002259	protein_coding	T22G5.2	-0.481717	0.17909
lbp-8	WBGene00002260	protein_coding	T22G5.6	-0.0946877	0.873447
ldb-1	WBGene00002261	protein_coding	F58A3.1	-0.334214	0.0182111
ldh-1	WBGene00002262	protein_coding	F13D12.2	-0.230815	0.384602
lea-1	WBGene00002263	protein_coding	K08H10.1	0.872463	0.00055452
lec-1	WBGene00002264	protein_coding	W09H1.6	-0.186406	0.30954
lec-2	WBGene00002265	protein_coding	F52H3.7	-0.140996	0.655262
lec-3	WBGene00002266	protein_coding	ZK892.1	-0.364145	0.154325
lec-4	WBGene00002267	protein_coding	C44F1.3	-0.256521	0.293452
lec-5	WBGene00002268	protein_coding	ZK1248.16	0.320644	0.0935649
lec-6	WBGene00002269	protein_coding	Y55B1AR.1	-0.324581	0.100594
lec-7	WBGene00002270	protein_coding	R07B1.2	-0.757715	0.0216854
lec-8	WBGene00002271	protein_coding	R07B1.10	-0.425208	0.121793
lec-9	WBGene00002272	protein_coding	C16H3.2	-1.32718	2.28e-16
lec-10	WBGene00002273	protein_coding	W01A11.4	-0.501207	0.02087
lec-11	WBGene00002274	protein_coding	F38A5.3	0.248516	0.380678
lem-2	WBGene00002275	protein_coding	W01G7.5	1.05711	0.00020914
lem-3	WBGene00002276	protein_coding	F42H11.2	0.520334	0.0685506
let-2	WBGene00002280	protein_coding	F01G12.5	0.288259	0.205039
let-4	WBGene00002282	protein_coding	C44H4.2	-0.224554	0.40482
let-19	WBGene00002295	protein_coding	K08F8.6	-0.0963562	0.535756
ect-2	WBGene00002297	protein_coding	T19E10.1	1.43275	2.97e-05
let-23	WBGene00002299	protein_coding	ZK1067.1	-0.416803	0.00191207
let-49	WBGene00002324	protein_coding	Y54E5B.3	0.352911	0.187116
let-60	WBGene00002335	protein_coding	ZK792.6	-0.0535832	0.74488
let-70	WBGene00002344	protein_coding	M7.1	-0.157394	0.123055
myo-1	WBGene00002348	protein_coding	R06C7.10	-0.139016	0.79976
let-92	WBGene00002363	protein_coding	F38H4.9	0.0519897	0.74488
let-99	WBGene00002368	protein_coding	K08E7.3	0.959304	0.0157391
lpr-1	WBGene00002393	protein_coding	Y65B4BR.2	-0.0602922	0.926564
let-268	WBGene00002497	protein_coding	F52H3.1	0.108447	0.738979
let-363	WBGene00002583	protein_coding	B0261.2	-0.16561	0.21556
let-381	WBGene00002601	protein_coding	F26B1.7	0.107728	0.767093
let-413	WBGene00002632	protein_coding	F26D11.11	-0.118672	0.445085
let-418	WBGene00002637	protein_coding	F26F12.7	0.54799	0.00063688
let-502	WBGene00002694	protein_coding	C10H11.9	0.538197	0.00036627
let-504	WBGene00002696	protein_coding	E01A2.4	0.657614	0.0125644
let-526	WBGene00002717	protein_coding	C01G8.9	-0.0649501	0.807766
let-607	WBGene00002783	protein_coding	F57B10.1	-0.118086	0.53498
let-653	WBGene00002827	protein_coding	C29E6.1	-0.470761	0.138627
let-711	WBGene00002845	protein_coding	F57B9.2	0.22973	0.232328
let-716	WBGene00002850	protein_coding	C16A3.3	-0.0504184	0.872328
let-721	WBGene00002855	protein_coding	C05D11.12	-0.155523	0.380508
let-754	WBGene00002879	protein_coding	C29E4.8	-0.15704	0.511912
let-756	WBGene00002881	protein_coding	C05D11.4	-0.417439	0.00948761
let-765	WBGene00002889	protein_coding	F20H11.2	0.120827	0.497953
let-767	WBGene00002891	protein_coding	C56G2.6	-0.22148	0.400564
let-805	WBGene00002915	protein_coding	H19M22.2	0.395016	0.0928989
let-858	WBGene00002957	protein_coding	F33A8.1	0.502621	0.0280043
lev-1	WBGene00002974	protein_coding	F09E8.7	0.187165	0.179607
lev-8	WBGene00002975	protein_coding	C35C5.5	-0.266359	0.434366
lev-9	WBGene00002976	protein_coding	T07H6.5	0.204967	0.516154
lev-10	WBGene00002977	protein_coding	Y105E8A.7	0.149026	0.504129
lev-11	WBGene00002978	protein_coding	Y105E8B.1	-0.24061	0.434893
lfe-2	WBGene00002979	protein_coding	C46H11.4	-0.400372	8.84e-05
lgg-1	WBGene00002980	protein_coding	C32D5.9	-0.349386	0.0100564
lgg-2	WBGene00002981	protein_coding	ZK593.6	-0.452362	0.00260311
lgg-3	WBGene00002982	protein_coding	B0336.8	0.0832277	0.820242
lgx-1	WBGene00002983	protein_coding	C54G7.3	-0.0871978	0.893437
lig-1	WBGene00002985	protein_coding	C29A12.3	1.10221	0.00011636
lig-4	WBGene00002986	protein_coding	C07H6.1	-0.213375	0.468146
lim-4	WBGene00002987	protein_coding	ZC64.4	-0.333707	0.407412
lim-6	WBGene00002988	protein_coding	K03E6.1	-0.0612562	0.894331
lim-7	WBGene00002989	protein_coding	C04F1.3	-0.274797	0.465763
lin-1	WBGene00002990	protein_coding	C37F5.1	0.0843547	0.622571
lin-2	WBGene00002991	protein_coding	F17E5.1	-0.195654	0.250334
lin-3	WBGene00002992	protein_coding	F36H1.4	-0.298922	0.214808
lin-5	WBGene00002994	protein_coding	T09A5.10	0.177851	0.343104
lin-7	WBGene00002996	protein_coding	Y54G11A.10	-0.0987661	0.653581
lin-8	WBGene00002997	protein_coding	B0454.1	0.257095	0.205738
lin-9	WBGene00002998	protein_coding	ZK637.7	0.858372	5.72e-06
lin-10	WBGene00002999	protein_coding	C09H6.2	0.00875205	0.978712
lin-11	WBGene00003000	protein_coding	ZC247.3	-0.491598	0.00817159
lin-12	WBGene00003001	protein_coding	R107.8	0.229055	0.463333
lin-13	WBGene00003002	protein_coding	C03B8.4	0.573771	2.21e-05
lin-14	WBGene00003003	protein_coding	T25C12.1	-0.115767	0.483985
lin-17	WBGene00003006	protein_coding	Y71F9B.5	-0.544499	0.0145909
lin-18	WBGene00003007	protein_coding	C16B8.1	-0.192351	0.463366
lin-22	WBGene00003008	protein_coding	Y54G2A.1	0.441859	0.188279
lin-23	WBGene00003009	protein_coding	K10B2.1	0.0322729	0.839388
lin-24	WBGene00003010	protein_coding	B0001.1	-0.0141521	0.959359
lin-25	WBGene00003011	protein_coding	F56H9.5	-0.278953	0.0727863
lin-26	WBGene00003012	protein_coding	F18A1.2	0.019481	0.959281
lin-28	WBGene00003014	protein_coding	F02E9.2	-0.256184	0.023875
lin-29	WBGene00003015	protein_coding	W03C9.4	-0.0238005	0.959084
lin-31	WBGene00003017	protein_coding	K10G6.1	-0.761936	0.00191522
lin-32	WBGene00003018	protein_coding	T14F9.5	0.2691	0.556968
lin-33	WBGene00003019	protein_coding	H32C10.2	-0.174386	0.343104
lin-35	WBGene00003020	protein_coding	C32F10.2	0.101237	0.616128
lin-36	WBGene00003021	protein_coding	F44B9.6	0.511503	0.00199784
lin-37	WBGene00003022	protein_coding	ZK418.4	0.364009	0.0782521
lin-39	WBGene00003024	protein_coding	C07H6.7	0.613238	0.0417306
lin-40	WBGene00003025	protein_coding	T27C4.4	0.152894	0.504104
lin-41	WBGene00003026	protein_coding	C12C8.3	0.147715	0.444989
lin-44	WBGene00003029	protein_coding	E01A2.3	-0.494215	0.136822
lin-45	WBGene00003030	protein_coding	Y73B6A.5	-0.174782	0.162789
lin-46	WBGene00003031	protein_coding	R186.4	-0.338551	0.246452
lin-48	WBGene00003033	protein_coding	F34D10.5	-0.562013	0.0495257
lin-49	WBGene00003034	protein_coding	F42A9.2	-0.0442632	0.799053
lin-52	WBGene00003035	protein_coding	ZK632.13	0.0845121	0.793846
lin-53	WBGene00003036	protein_coding	K07A1.12	0.842733	0.00111121
lin-54	WBGene00003037	protein_coding	JC8.6	0.907146	0.00236646
lin-56	WBGene00003038	protein_coding	ZK673.3	0.438839	0.0446696
lin-59	WBGene00003040	protein_coding	T12F5.4	0.0292345	0.909055
lin-61	WBGene00003041	protein_coding	R06C7.7	0.350176	0.0882208
lip-1	WBGene00003043	protein_coding	C05B10.1	0.0556373	0.801931
lir-1	WBGene00003044	protein_coding	F18A1.3	-0.2347	0.27046
lir-2	WBGene00003045	protein_coding	F18A1.4	-0.111816	0.647308
lir-3	WBGene00003046	protein_coding	F37H8.1	0.596284	0.0304196
lis-1	WBGene00003047	protein_coding	T03F6.5	-0.00902947	0.971616
lit-1	WBGene00003048	protein_coding	W06F12.1	0.0576559	0.777213
lmn-1	WBGene00003052	protein_coding	DY3.2	-0.29145	0.113812
lmp-1	WBGene00003053	protein_coding	C03B1.12	0.0203932	0.930892
lon-1	WBGene00003055	protein_coding	F48E8.1	0.381145	0.382984
lon-2	WBGene00003056	protein_coding	C39E6.1	0.176762	0.402577
lon-3	WBGene00003057	protein_coding	ZK836.1	0.134339	0.688975
lov-1	WBGene00003058	protein_coding	ZK945.9	-0.111423	0.853401
lpd-2	WBGene00003059	protein_coding	C48E7.3	-0.0435984	0.923499
lpd-3	WBGene00003060	protein_coding	Y47G6A.23	0.279527	0.140587
lpd-5	WBGene00003061	protein_coding	ZK973.10	-0.341956	0.322202
lpd-6	WBGene00003062	protein_coding	K09H9.6	0.321116	0.30527
lpd-7	WBGene00003063	protein_coding	R13A5.12	0.0546996	0.76524
lpd-8	WBGene00003064	protein_coding	R10H10.1	-0.0205628	0.9393
lpd-9	WBGene00003065	protein_coding	T21C9.5	-0.237325	0.188545
lpl-1	WBGene00003066	protein_coding	ZC410.7	-0.123325	0.491757
lrk-1	WBGene00003068	protein_coding	T27C10.6	-0.0377548	0.84295
lrp-1	WBGene00003071	protein_coding	F29D11.1	-0.00515002	0.989307
lrp-2	WBGene00003072	protein_coding	T21E3.3	0.104483	0.561668
lars-1	WBGene00003073	protein_coding	R74.1	0.403979	0.00433266
lars-2	WBGene00003074	protein_coding	ZK524.3	0.121506	0.656581
lrx-1	WBGene00003075	protein_coding	T04H1.6	0.0175286	0.983333
lsm-1	WBGene00003076	protein_coding	F40F8.9	0.0526688	0.903403
lsm-3	WBGene00003077	protein_coding	Y62E10A.12	-0.158298	0.452902
lsm-4	WBGene00003078	protein_coding	F32A5.7	0.371853	0.12479
lsm-5	WBGene00003079	protein_coding	F28F8.3	0.35408	0.127646
lsm-6	WBGene00003080	protein_coding	Y71G12B.14	-0.193197	0.405743
lsm-7	WBGene00003081	protein_coding	ZK593.7	-0.119836	0.624722
lsm-8	WBGene00003082	protein_coding	Y73B6BL.32	0.179313	0.477203
lst-1	WBGene00003083	protein_coding	T22A3.3	0.8694	0.00993205
lst-2	WBGene00003084	protein_coding	R160.7	-0.256436	0.0633518
lst-3	WBGene00003085	protein_coding	Y37A1B.1	0.349918	0.0798702
lst-4	WBGene00003086	protein_coding	Y37A1B.2	0.133796	0.56527
lsy-2	WBGene00003087	protein_coding	F49H12.1	0.0831852	0.743098
ltd-1	WBGene00003089	protein_coding	K02C4.4	-0.605852	0.00041354
lys-1	WBGene00003090	protein_coding	Y22F5A.4	-0.396111	0.123055
lys-2	WBGene00003091	protein_coding	Y22F5A.5	-0.0372796	0.946356
lys-3	WBGene00003092	protein_coding	Y22F5A.6	0.803408	0.00881396
lys-4	WBGene00003093	protein_coding	F58B3.1	-0.00551576	0.994999
lys-5	WBGene00003094	protein_coding	F58B3.2	0.311089	0.53425
lys-6	WBGene00003095	protein_coding	F58B3.3	0.508176	0.245282
lys-7	WBGene00003096	protein_coding	C02A12.4	-0.167885	0.728853
lys-8	WBGene00003097	protein_coding	C17G10.5	0.0612374	0.902043
lys-9	WBGene00003098	protein_coding	C54C8.6	0.212708	0.177398
lys-10	WBGene00003099	protein_coding	F17E9.11	-0.37162	0.434517
mab-3	WBGene00003100	protein_coding	Y53C12B.5	0.175699	0.753738
mab-5	WBGene00003102	protein_coding	C08C3.3	-0.330625	0.23898
mab-7	WBGene00003104	protein_coding	ZC13.4	0.558845	0.185477
mab-9	WBGene00003106	protein_coding	T27A1.6	-0.548192	0.0348521
mab-10	WBGene00003107	protein_coding	R166.1	0.762203	0.0478654
mab-20	WBGene00003111	protein_coding	Y71G12B.20	0.0488057	0.884016
mab-21	WBGene00003112	protein_coding	F35G12.6	-0.130148	0.605533
mab-23	WBGene00003114	protein_coding	C32C4.5	0.507144	0.232328
mac-1	WBGene00003119	protein_coding	Y48C3A.7	-0.121965	0.47772
mag-1	WBGene00003123	protein_coding	R09B3.5	0.506634	0.00281974
mai-1	WBGene00003124	protein_coding	K10B3.9	0.0100252	0.988515
map-1	WBGene00003129	protein_coding	Y37E11AL.7	0.188321	0.40356
map-2	WBGene00003130	protein_coding	Y116A8A.9	0.306875	0.0686221
mat-1	WBGene00003132	protein_coding	Y110A7A.17	0.259989	0.105533
mat-2	WBGene00003133	protein_coding	W10C6.1	0.818846	0.0002818
mat-3	WBGene00003134	protein_coding	F10C5.1	0.689379	0.00298805
mau-2	WBGene00003136	protein_coding	C09H6.3	0.110177	0.677802
mau-8	WBGene00003142	protein_coding	Y62E10A.8	0.180177	0.441415
max-1	WBGene00003143	protein_coding	C34B4.1	-0.391866	0.0118276
max-2	WBGene00003144	protein_coding	Y38F1A.10	0.270613	0.0633806
mbf-1	WBGene00003148	protein_coding	H21P03.1	0.475698	0.00825641
mbk-1	WBGene00003149	protein_coding	T04C10.1	-0.173118	0.449377
mbk-2	WBGene00003150	protein_coding	F49E11.1	0.0167138	0.95334
mca-1	WBGene00003151	protein_coding	W09C2.3	0.670275	0.0284898
mca-3	WBGene00003153	protein_coding	Y67D8C.10	-0.120411	0.542525
mcm-2	WBGene00003154	protein_coding	Y17G7B.5	1.18506	0.00031571
mcm-3	WBGene00003155	protein_coding	C25D7.6	1.18205	0.00017283
mcm-4	WBGene00003156	protein_coding	Y39G10AR.14	1.04116	0.00100619
mcm-5	WBGene00003157	protein_coding	R10E4.4	1.37356	1.15e-05
mcm-6	WBGene00003158	protein_coding	ZK632.1	0.885049	0.00073994
mcm-7	WBGene00003159	protein_coding	F32D1.10	1.17821	0.00216392
[truncated: 18,449 more rows]

## Sheet: miR-85 (n4117) RNA-seq
L1 mRNA-seq derived from WT or miR-85 KO mothers exposed to 300mM NaCl or 50mM NaCl
gene name	gene ID	type	cosmid	log2FC WT 300mM vs 50mM	FDR	log2FC miR-85KO 300mM vs 50mM	FDR	log2FC 300mM (miR-85KO vs WT)	FDR	log2FC 300mM (P0hetF1KO vs. P0hetF1het)	FDR
aap-1	WBGene00000001	protein_coding	Y110A7A.10	0.0481876	0.992651	-0.0714653	0.997809	0.0159733	0.999957	-0.11233	0.999977
aat-1	WBGene00000002	protein_coding	F27C8.1	-0.180811	0.957707	-0.727913	0.531967	-0.926057	0.999957	0.222065	0.954616
aat-2	WBGene00000003	protein_coding	F07C3.7	0.227169	0.94058	0.0412071	0.998997	-0.258042	0.999957	-0.0190431	0.999977
aat-3	WBGene00000004	protein_coding	F52H2.2	0.0436518	0.992145	0.174989	0.981405	0.030852	0.999957	-0.169425	0.81048
aat-4	WBGene00000005	protein_coding	T13A10.10a	0.410082	1	2.41041	1	0.579539	1	1.02114	0.883221
aat-5	WBGene00000006	protein_coding	C55C2.5a	-0.0973458	0.98418	-0.212905	0.967778	-0.236099	0.999957	0.0269517	0.999977
aat-6	WBGene00000007	protein_coding	T11F9.4b.1	0.182512	0.972349	0.773	0.658775	0.0775345	0.999957	-0.208771	0.999977
aat-7	WBGene00000008	protein_coding	F54D12.3	0.722072	0.814675	-0.343307	0.993021	-0.738363	0.999957	-0.695948	1
aat-8	WBGene00000009	protein_coding	F28F9.4	-0.116188	1	1.24862	1	1.29482	1	-0.59481	0.835526
aat-9	WBGene00000010	protein_coding	Y53H1C.1a	-0.138547	0.977175	0.014191	0.998997	0.256951	0.999957	0.0690015	0.999977
abf-1	WBGene00000012	protein_coding	C50F2.9	3.01334	1	0.218678	1	-1.49121	1	0.456253	1
abf-2	WBGene00000013	protein_coding	C50F2.10	0.166954	1	-0.0180486	1	-0.604579	1	-0.51159	0.999977
abf-3	WBGene00000014	protein_coding	F54B8.5	0	1	0	1	0	1	0	1
abf-4	WBGene00000015	protein_coding	Y38H6C.22	-1.9019	1	-0.483954	1	1.24608	1	-0.281924	0.999977
abf-5	WBGene00000016	protein_coding	T22H6.5	-0.907627	0.319385	-1.47553	0.307602	-0.757272	0.999957	-0.0260057	0.999977
abf-6	WBGene00000017	protein_coding	T22H6.7	-0.95061	0.093527	-1.44774	0.0889156	-0.924688	0.999957	-0.0834948	0.999977
abl-1	WBGene00000018	protein_coding	M79.1c	0.322673	0.854796	0.28637	0.948453	-0.11894	0.999957	-0.0399964	0.999977
abt-1	WBGene00000019	protein_coding	C24F3.5b	-0.389132	1	0.377358	1	-0.574784	1	-2.24158	1
abt-2	WBGene00000020	protein_coding	F12B6.1b	-0.0948393	0.985084	0.354437	0.867473	0.240626	0.999957	-0.0566213	0.999977
abt-4	WBGene00000022	protein_coding	Y39D8C.1	0.389338	0.839751	0.113308	0.995725	-0.136011	0.999957	0.6056	0.498877
abt-5	WBGene00000023	protein_coding	Y53C10A.9	0.417845	1	-1.86522	1	-1.98054	1	0.410717	0.999977
abu-1	WBGene00000024	protein_coding	AC3.3	-0.948708	1	-2.28588	1	-1.73872	1	3.23452	1
abu-2	WBGene00000025	protein_coding	F19G12.7	0.778701	1	-0.0944246	1	-2.15273	1	0.87784	1
abu-3	WBGene00000026	protein_coding	F31A3.1	0	1	0	1	0	1	0	1
abu-4	WBGene00000027	protein_coding	Y5H2A.3	0	1	0	1	0	1	0	1
abu-5	WBGene00000028	protein_coding	Y105C5A.4	1.01867	1	-1.3817	1	-1.1792	1	0	1
abu-6	WBGene00000029	protein_coding	C03A7.7	-1.51786	1	-1.38408	1	0	1	0	1
abu-7	WBGene00000030	protein_coding	C03A7.8	1.63672	1	-1.31173	1	-0.447257	1	-3.89325	1
abu-8	WBGene00000031	protein_coding	C03A7.14	-0.797926	1	2.78388	1	2.32844	1	2.63659	0.0873946
abu-9	WBGene00000032	protein_coding	R09F10.2	-1.51786	1	2.34758	1	2.53541	1	1.41979	1
abu-10	WBGene00000033	protein_coding	F35A5.3	-1.54846	1	-3.33059	1	-2.23636	1	1.74643	0.0463767
abu-11	WBGene00000034	protein_coding	T01D1.6	3.50678	1	-0.977275	1	-1.28623	1	1.46773	0.379391
ace-1	WBGene00000035	protein_coding	W09B12.1.2	-0.398119	0.76661	-0.0379209	0.998997	0.0856362	0.999957	0.0696249	0.999977
ace-2	WBGene00000036	protein_coding	Y44E3A.2	0.0912506	0.983593	0.150377	0.98666	0.128622	0.999957	-0.134194	0.958694
ace-3	WBGene00000037	protein_coding	Y48B6A.8	-0.566498	0.616835	-0.496725	0.89514	-0.189125	0.999957	0.307313	0.4104
ace-4	WBGene00000038	protein_coding	Y48B6A.7	-0.765968	0.510289	-0.153144	0.996452	-0.204638	0.999957	0.236559	0.989994
acn-1	WBGene00000039	protein_coding	C42D8.5b	1.35029	1	0.0299066	1	-0.373827	1	1.64553	3.70406e-07
aco-1	WBGene00000040	protein_coding	ZK455.1	0.18869	0.94961	0.200409	0.967778	0.131768	0.999957	-0.381763	0.014225
aco-2	WBGene00000041	protein_coding	F54H12.1a	-0.00807918	0.997863	-0.0236284	0.998997	0.137095	0.999957	0.0857489	0.999977
acr-2	WBGene00000042	protein_coding	K11G12.2	0.00176474	0.999824	0.0162533	0.998997	-0.116972	0.999957	0.14878	0.999977
acr-3	WBGene00000043	protein_coding	K11G12.7	-0.612037	0.83933	-0.732955	0.92873	-0.415449	1	-0.317672	0.999977
acr-5	WBGene00000044	protein_coding	K03F8.2	0.0261839	0.99692	-0.224233	0.983577	-0.323047	0.999957	0.0651151	0.999977
acr-6	WBGene00000045	protein_coding	ZK973.5	-0.329853	1	0.436693	1	0.726541	1	-0.0575392	0.999977
acr-7	WBGene00000046	protein_coding	T09A5.3	-0.31843	0.952009	-0.806355	0.813313	-0.401208	0.999957	-0.399762	0.989787
acr-8	WBGene00000047	protein_coding	ZC504.2	0.0224402	0.997131	0.254859	0.97282	-0.161242	0.999957	0.178303	0.999977
acr-9	WBGene00000048	protein_coding	C40C9.2	0.591348	0.865748	0.405814	0.973402	0.0227144	0.999957	0.248067	0.999977
acr-10	WBGene00000049	protein_coding	R02E12.8	0.541455	1	-0.136466	1	-0.10337	1	-0.0755247	0.999977
acr-11	WBGene00000050	protein_coding	D2092.3	-0.0644925	0.995422	-0.755436	0.930798	-0.766097	1	0.447745	0.999977
acr-12	WBGene00000051	protein_coding	R01E6.4	-0.0231079	0.997131	-0.127058	0.995725	-0.274057	0.999957	0.0546529	0.999977
acr-14	WBGene00000053	protein_coding	T05C12.2	0.5563	0.913656	0.142807	1	-0.513264	1	-0.0274446	0.999977
acr-15	WBGene00000054	protein_coding	F25G6.4	-0.28331	0.935733	-0.730237	0.663507	-0.568688	0.999957	0.143491	0.999977
acr-16	WBGene00000055	protein_coding	F25G6.3b	0.0492557	0.992651	0.0190464	0.998997	-0.296702	0.999957	0.00809584	0.999977
acr-17	WBGene00000056	protein_coding	F53E10.2a	0.00567897	0.998775	-0.831164	0.831905	-0.919671	0.999957	-0.222255	0.999977
acr-18	WBGene00000057	protein_coding	F28F8.1	-0.0278436	0.99692	-0.605436	0.826783	-0.563587	0.999957	0.259286	0.845082
acr-19	WBGene00000058	protein_coding	C31H5.3b	-0.162969	0.963408	-0.151308	0.995578	-0.131167	0.999957	-0.00977981	0.999977
acr-20	WBGene00000059	protein_coding	R06A4.10a	-0.148775	0.975594	-0.625793	0.892132	-0.87638	0.999957	0.48835	0.458476
acr-21	WBGene00000060	protein_coding	F27B3.2	-0.140502	0.978145	-0.135523	0.996338	-0.27156	0.999957	-0.176594	0.999977
lgc-11	WBGene00000061	protein_coding	F48E3.7	-0.639773	0.701409	-1.13881	0.510867	-0.952497	0.999957	0.0535936	0.999977
acr-23	WBGene00000062	protein_coding	F59B1.9	0.398113	0.859602	0.253538	0.983577	-0.13759	0.999957	-0.121663	0.999977
act-1	WBGene00000063	protein_coding	T04C12.6.2	-0.629171	0.419772	-0.367613	0.850863	0.00327366	0.999957	0.121448	0.981071
act-2	WBGene00000064	protein_coding	T04C12.5.1	0.0432313	0.992651	0.233321	0.964025	0.342029	0.999957	0.103959	0.999977
act-3	WBGene00000065	protein_coding	T04C12.4.1	-0.610499	0.404036	-0.27915	0.927984	0.163177	0.999957	0.151489	0.919948
act-4	WBGene00000066	protein_coding	M03F4.2a	-0.450432	0.686965	0.103272	0.995725	0.212772	0.999957	0.115934	0.92869
act-5	WBGene00000067	protein_coding	T25C8.2.1	-0.575245	0.665088	-0.241873	0.952405	0.186185	0.999957	0.50294	0.00267636
acy-1	WBGene00000068	protein_coding	F17C8.1	-0.169823	0.956418	-0.217049	0.965573	-0.24327	0.999957	0.0418702	0.999977
acy-2	WBGene00000069	protein_coding	C10F3.3	-0.232365	0.941163	-0.0940218	0.996452	0.00343384	0.999957	-0.0472849	0.999977
acy-3	WBGene00000070	protein_coding	C44F1.5	0.496866	0.541835	0.531334	0.638429	0.0628691	0.999957	-0.0123171	0.999977
acy-4	WBGene00000071	protein_coding	T01C2.1	-0.20174	0.94961	-0.285024	0.957649	-0.3939	0.999957	0.17376	0.976075
add-1	WBGene00000072	protein_coding	F39C12.2b	0.661086	0.246291	0.356006	0.92584	-0.247865	0.999957	0.0687673	0.999977
add-2	WBGene00000073	protein_coding	F57F5.4b	-0.138856	0.968644	0.0500031	0.998997	-0.192444	0.999957	0.0534044	0.999977
adm-2	WBGene00000074	protein_coding	C04A11.4	-0.104485	0.980775	-0.0188002	0.998997	0.198051	0.999957	0.0384195	0.999977
adm-4	WBGene00000075	protein_coding	ZK154.7	-0.178975	0.963109	-0.0779078	0.996452	0.0931215	0.999957	-0.161563	0.999977
adr-1	WBGene00000079	protein_coding	H15N14.1g	0.684519	0.206934	0.565787	0.513619	0.521268	0.999957	-0.0996316	0.999977
adr-2	WBGene00000080	protein_coding	T20H4.4	-0.0668495	0.988817	-0.105976	0.995801	0.0700605	0.999957	-0.0166979	0.999977
ads-1	WBGene00000081	protein_coding	Y50D7A.7	-0.0227624	0.997131	0.30349	0.910388	0.383405	0.999957	0.0185144	0.999977
adt-1	WBGene00000082	protein_coding	C02B4.1	0.469272	0.683529	-0.140434	0.995725	-0.126613	0.999957	0.226464	0.721903
adt-2	WBGene00000083	protein_coding	F08C6.1c.2	0.397904	0.70796	0.658235	0.369715	0.104525	0.999957	0.189972	0.596427
aex-1	WBGene00000084	protein_coding	D2030.10a	0.058606	0.990715	0.303612	0.956923	0.249042	0.999957	0.0319149	0.999977
aex-2	WBGene00000085	protein_coding	T14B1.2	-0.155753	0.975594	-0.37714	0.953554	-0.371025	0.999957	-0.220742	0.999977
aex-3	WBGene00000086	protein_coding	C02H7.3a	0.0671959	0.987754	0.0779217	0.996452	-0.0530891	0.999957	0.00466168	0.999977
aex-5	WBGene00000088	protein_coding	F32A7.6	0.321635	0.84432	0.256376	0.969472	0.0194734	0.999957	-0.562723	0.00239188
aex-6	WBGene00000089	protein_coding	Y87G2A.4	-0.197524	0.947544	-0.28425	0.952405	-0.200795	0.999957	-0.0222054	0.999977
age-1	WBGene00000090	protein_coding	B0334.8	0.0795815	0.985084	0.146729	0.993021	0.0757579	0.999957	-0.045096	0.999977
ags-3	WBGene00000092	protein_coding	F32A6.4b	-0.0946273	0.980776	-0.0767309	0.996452	-0.0574185	0.999957	-0.145362	0.933699
agt-1	WBGene00000093	protein_coding	Y62E10A.5a	0.150137	0.976577	0.0635382	0.998997	-0.109904	0.999957	-0.0832107	0.999977
agt-2	WBGene00000094	protein_coding	F09E5.13	0.292237	0.947136	0.282654	0.983577	-0.0110368	0.999957	0.0223646	0.999977
aha-1	WBGene00000095	protein_coding	C25A1.11b	-0.367822	0.790501	-0.492692	0.691037	-0.150997	0.999957	-0.0939986	0.999977
ahr-1	WBGene00000096	protein_coding	C41G7.5a	-0.106873	0.985084	0.15188	0.995725	0.0479659	0.999957	-0.48019	0.275611
aip-1	WBGene00000097	protein_coding	F58E10.4	-0.4419	0.743967	-0.373675	0.903981	0.175642	0.999957	-0.0663234	0.999977
air-1	WBGene00000098	protein_coding	K07C11.2.2	0.970789	0.202595	1.25441	0.156186	0.172491	0.999957	-0.00233168	0.999977
air-2	WBGene00000099	protein_coding	B0207.4	1.42234	0.278943	0.964874	0.831395	-0.157645	0.999957	0.0228472	0.999977
ajm-1	WBGene00000100	protein_coding	C25A11.4b	0.00763474	0.997863	0.0308185	0.998997	0.00852482	0.999957	0.0591538	0.999977
aka-1	WBGene00000101	protein_coding	D1022.7b.1	0.0930934	0.980693	-0.0766581	0.996452	-0.147114	0.999957	-0.107667	0.990589
akt-1	WBGene00000102	protein_coding	C12D8.10c	-0.344277	0.798498	-0.235706	0.9568	-0.0378847	0.999957	0.126368	0.976313
akt-2	WBGene00000103	protein_coding	F28H6.1a	-0.467643	0.589777	-0.419331	0.776818	-0.00647358	0.999957	0.112871	0.999977
alg-1	WBGene00000105	protein_coding	F48F7.1b	0.486034	0.569481	0.371548	0.854869	-0.0427662	0.999957	-0.0358436	0.999977
alg-2	WBGene00000106	protein_coding	T07D3.7a	0.2034	0.95704	0.112517	0.995725	0.0389851	0.999957	-0.0384864	0.999977
alh-1	WBGene00000107	protein_coding	F54D8.3b.1	0.615031	0.313144	0.554402	0.534034	-0.140481	0.999957	-0.256724	0.300674
alh-2	WBGene00000108	protein_coding	K04F1.15	-0.81252	1	1.34168	1	1.92602	1	2.7631	1
alh-3	WBGene00000109	protein_coding	F36H1.6	0.0894315	0.98445	0.0309707	0.998997	-0.160311	0.999957	-0.0524193	0.999977
alh-4	WBGene00000110	protein_coding	T05H4.13a.1	-0.655774	0.25367	-0.545601	0.599057	0.0197412	0.999957	-0.0327247	0.999977
alh-5	WBGene00000111	protein_coding	T08B1.3	0.880165	0.0576735	0.375869	0.900949	-0.25717	0.999957	0.152799	0.926717
alh-6	WBGene00000112	protein_coding	F56D12.1d.1	0.106301	0.98042	-0.0831965	0.996452	-0.189387	0.999957	0.302997	0.541914
alh-7	WBGene00000113	protein_coding	F45H10.1a.2	-0.0437224	0.992657	0.119849	0.995725	-0.0105887	0.999957	0.81559	2.39458e-07
alh-8	WBGene00000114	protein_coding	F13D12.4a.3	-0.483575	0.557837	-0.379108	0.811975	0.211982	0.999957	-0.0468353	0.999977
alh-9	WBGene00000115	protein_coding	F01F1.6.2	0.377419	0.755367	0.320558	0.900949	-0.336124	0.999957	0.17508	0.862549
alh-10	WBGene00000116	protein_coding	C54D1.4	-0.0601103	0.990715	0.111004	0.996452	-0.0377688	0.999957	0.0211414	0.999977
alh-11	WBGene00000117	protein_coding	F42G9.5b	0.367459	0.819754	0.388239	0.880018	0.0854757	0.999957	-0.121877	0.999977
alh-12	WBGene00000118	protein_coding	Y69F12A.2b.2	-0.0335094	0.994613	-0.0667279	0.996452	-0.033372	0.999957	0.0918785	0.999977
aly-1	WBGene00000120	protein_coding	C01F6.5	0.498342	0.760129	0.651164	0.609583	0.296027	0.999957	0.152616	0.999977
aly-2	WBGene00000121	protein_coding	F23B2.6	0.481823	0.833343	0.498542	0.905788	0.15935	0.999957	0.191084	0.999977
aly-3	WBGene00000122	protein_coding	M18.7a.2	0.0581304	0.988817	0.195958	0.973402	0.0541087	0.999957	-0.0443178	0.999977
ama-1	WBGene00000123	protein_coding	F36A4.7	0.516135	0.665088	0.715659	0.23911	0.320345	0.999957	-0.0223685	0.999977
amt-1	WBGene00000133	protein_coding	C05E11.4	0.475378	0.941163	0.773907	0.904265	0.469708	0.999957	0.227844	0.969778
amt-2	WBGene00000134	protein_coding	F49E11.3	-0.261905	0.963408	0.181863	0.995725	0.324078	0.999957	-0.0445754	0.999977
amt-3	WBGene00000135	protein_coding	M195.3	-0.13038	0.975594	0.0804153	0.996452	-0.0788909	0.999957	0.13283	0.999977
amt-4	WBGene00000136	protein_coding	C05E11.5	0.595185	0.470306	0.653965	0.694251	0.225626	0.999957	-0.615171	0.190832
amx-1	WBGene00000137	protein_coding	R13G10.2	-0.0530488	0.992145	0.000479054	0.999512	0.0457027	0.999957	-0.199563	0.933699
amx-2	WBGene00000138	protein_coding	B0019.1	-0.373045	0.804693	-0.600329	0.604191	-0.261896	0.999957	-0.0850281	0.999977
amx-3	WBGene00000139	protein_coding	F25C8.2b	-0.117424	0.986811	-0.0874297	0.998997	0.0733932	0.999957	-0.437898	0.969768
anc-1	WBGene00000140	protein_coding	ZK973.6	0.496948	0.684121	0.599261	0.504874	0.0362804	0.999957	0.282139	0.105465
aos-1	WBGene00000142	protein_coding	C08B6.9	0.128835	0.975594	0.20797	0.978004	-0.00950336	0.999957	-0.155388	0.976128
apc-2	WBGene00000143	protein_coding	K06H7.6	0.260035	0.937356	0.160427	0.993955	0.133555	0.999957	-0.167866	0.999977
apc-10	WBGene00000144	protein_coding	F15H10.3c	-0.482199	1	0.410883	1	0.934387	1	1.3305	1
apc-11	WBGene00000145	protein_coding	F35G12.9	-0.345219	0.931241	-0.531392	0.917985	-0.296669	0.999957	-0.321736	0.962537
ape-1	WBGene00000146	protein_coding	F46F3.4a	0.0971253	0.979742	-0.13743	0.992405	-0.0977837	0.999957	0.0176775	0.999977
aph-1	WBGene00000147	protein_coding	VF36H2L.1	-0.175763	0.97458	-0.206458	0.991676	0.0964959	0.999957	-0.111352	0.999977
aph-2	WBGene00000148	protein_coding	ZC434.6b	0.104827	0.980693	0.259193	0.966318	-0.0823939	0.999957	0.120976	0.999977
apl-1	WBGene00000149	protein_coding	C42D8.8a	-0.539133	0.5362	-0.107872	0.995725	0.0795042	0.999957	0.0530637	0.999977
apm-1	WBGene00000150	protein_coding	F55A12.7	-0.114151	0.977175	0.0600323	0.997809	0.131481	0.999957	-0.152651	0.906626
apn-1	WBGene00000151	protein_coding	T05H10.2	-0.083975	0.987754	0.0611516	0.998997	0.151288	0.999957	-0.0466652	0.999977
app-1	WBGene00000155	protein_coding	W03G9.4.1	-0.022584	0.99692	-0.0402002	0.998997	-0.0257931	0.999957	0.073756	0.999977
[truncated: 20,315 more rows]

## Sheet: miR-85 (n4117) miRNA-seq
L1 miRNA-seq from mir-85 het or KO progeny derived from heterozygous mothers under osmotic stress (300 mM NaCl)
[truncated: 453 more rows]
