# Supplementary material for: Soma-to-Germline miRNA inheritance via Yolk Promotes Stress Resilience in Progeny
Source: Research Square preprint supplement (doi:10.21203/rs.3.rs-4711258/v1), 2025-07-09
Supplement: Supplementary file 7 [file da6b68333e3ad539b78c52bf.xlsx]

## Sheet: Strain list
Supplementary Table 7. Strain list generated or used in this study.
Strain name	Genotype	Method	Strain origin	Description
N2	C. elegans wild isolate (Bristol)		CGC
BCN9070	vit-2(crg9070[vit-2::gfp]) X	CRISPR-Cas9	B. Lehner Lab	VIT-2::GFP strain.
MHE210	wrdSi51 [mex-5p::TIR1::F2A::mTagBFP2::AID*::NLS::tbb-2 3'UTR] (II:0.77) ; rme-2(gcp072[rme-2::AID::2xHA])IV; vit-2(crg9070[vit-2::gfp]) X	CRISPR-Cas9	this study	RME-2 AID Degron with VIT-2::GFP. Strain used for VIT-2::GFP sorting
MHE225	wrdSi51 [mex-5p::TIR1::F2A::mTagBFP2::AID*::NLS::tbb-2 3'UTR] (II:0.77) ; rme-2(gcp080[rme-2::AID::2XHA]) IV	CRISPR-Cas9	this study	RME-2 AID Degron.
MHE235	gcp88[mex-5p::TIR1(F79G)::F2A::mTagBFP2::AID*::NLS::tbb-2 3'UTR] (II:0.77) ; rme-2(gcp080[rme-2::AID::2XHA]) IV	CRISPR-Cas9	this study	RME-2 AID2 Degron. We introduced TIR-1 F79G mutation in MHE225 by CRISPR-Cas9
MHE234	gcp88[mex-5p::TIR1(F79G)::F2A::mTagBFP2::AID*::NLS::tbb-2 3'UTR] (II:0.77) ; rme-2(gcp080[rme-2::AID::2XHA]) IV; vit-2(crg9070[vit-2::gfp]) X	Cross	this study	RME-2 AID2 Degron with VIT-2::GFP. Obtained by crossing MHE235 and BCN9070
MLC1726	drsh-1(luc82[myc::AID::3XFLAG::4xGGSG::drsh-1::4xGGSG::3xFLAG::AID::myc]) pash-1(luc71[pash-1::2xGGSG::3xFLAG::AID::myc]) I; ieSi57 II; unc-119(ed3) III; ieSi38 IV.	CRISPR-Cas9	L.Cochella Lab	Somatic (Petf-3) and germline (Psun-1) expression of TIR-1 for Drosha Pasha Degron strain.
DV3826	reSi12 [ges-1p::TIR1::F2A::mTagBFP2::AID*::NLS::tbb-2 3'UTR] (II:0.77)	MosSCI	CGC	Intestinal-specific (Pges-1) expression of TIR1 co-factor for AID, and tissue-specific AID-tagged blue protein in intestinal nuclei. ttTi5605 II:0.77
MHE228	drsh-1(luc82[myc::AID::3XFLAG::4xGGSG::drsh-1::4xGGSG::3xFLAG::AID::myc]) pash-1(luc71[pash-1::2xGGSG::3xFLAG::AID::myc]) I	Cross	this study	Cross between MLC1726 and N2 strains to remove Somatic (Petf-3) and germline (Psun-1) TIR-1
MHE229	drsh-1(luc82[myc::AID::3XFLAG::4xGGSG::drsh-1::4xGGSG::3xFLAG::AID::myc]) pash-1(luc71[pash-1::2xGGSG::3xFLAG::AID::myc]) I; reSi12 [ges-1p::TIR1::F2A::mTagBFP2::AID*::NLS::tbb-2 3'UTR] (II:0.77)	Cross	this study	Cross between MHE228 and DV3826 to obtain Intestinal Drosha and Pasha degradation.
MHE241	drsh-1(luc82[myc::AID::3XFLAG::4xGGSG::drsh-1::4xGGSG::3xFLAG::AID::myc]) pash-1(luc71[pash-1::2xGGSG::3xFLAG::AID::myc]) I; reSi12 [ges-1p::TIR1::F2A::mTagBFP2::AID*::NLS::tbb-2 3'UTR] (II:0.77); vit-2(crg9070[vit-2::gfp]) X	Cross	this study	Cross between MHE229 and BCN9070. Intestinal Drosha and Pasha degradation with VIT-2::GFP.
MT12999	mir-85(n4117) II.	CRISPR-Cas9	CGC	Deletion breakpoints are:TCATCTGATGACTTATCTTCA / TACTCGTGT...AACGTGATGAA / GGTCCGGATAGGGCTTGAGCTATTCGTT.
MT17997	mir-235(n4504) I.	CRISPR-Cas9	CGC	Deletion breakpoints are: ATCGGCCATCAGAACAGTGCAAGAAAT / TTGAGAAATATG...ATCCACAGGTGGT / GTCATCTGAAGAAAGGACACACATACATA.
MHE324	mir-85(n4117)/mIn1 [mIs14 dpy-10(e128)] II	Cross	this study	Cross between MT12999 and mIn1 mIs14 carrying strain
MHE310	hrg-1(gcp100[hrg-1_mir85 seed mutated]) X	CRISPR-Cas9	this study	CRISPR in N2, mutation of mir85 in hrg-1 3'UTR. Wt mir85 = attttgta Mutated mirtron site = tgtcttgt. The last mutation of a to t isn’t necessary for the targeting of mirtron mutated but it removes a SpeI restriction site from the seq ->
