# Supplementary material for: Soma-to-Germline miRNA inheritance via Yolk Promotes Stress Resilience in Progeny
Source: Research Square preprint supplement (doi:10.21203/rs.3.rs-4711258/v1), 2025-07-09
Supplement: Supplementary file 8 [file de15b45f6e325153dc25fbc0.xlsx]

## Sheet: Sorted Yolk Mass Spec
Supplementary Table 1 : Identification of proteins from purified yolk granules (proteins detected with atleast 5 distinct peptides and 20 % or more coverage were considered). Viitellogenin proteins are highlighted in green. Proteins known to be asscociated with miRNA function, stabilistion or transport are highlighted in pink.
#	Identifier	Description	Gene Name	Matching peptides (validated)		Coverage (%)	Specificity (%) (best Analysis)				Detected in previous proteomics studies (denoted by 1)
				All ions	Distinct			Length (AA)	Mass (kDa)	Reference for role in miRNA function or stabilisation	Proteins in AIN-2 IP (Dallaire et al, 2018)	Proteins found in secreted yolk by mass spec (Kern et al., 2021)
1	P05690	Vitellogenin-2	vit-2	75	67	43.1	100	1613	187.722			1
2	P55155	Vitellogenin-1	vit-1	68	62	37.9	100	1616	188.063
3	P18947	Vitellogenin-4	vit-4	67	60	38.3	100	1603	186.309
4	P06125	Vitellogenin-5	vit-5	66	59	38.9	100	1603	186.439			1
5	Q9N4J2	Vitellogenin-3	vit-3	63	57	35.1	100	1603	186.53			1
6	P18948	Vitellogenin-6	vit-6	59	54	36.2	100	1651	193.318		1	1
7	Q17832	ViGiLN homolog	vgln-1	34	31	30.2	100	1220	134.344	(Zabinsky et al, 2017)
8	Q19328	Tudor Staphylococcal Nuclease homolog	tsn-1	27	23	34.2	100	914	100.775	(Caudy et al, 2003)	1
9	P46769	40S ribosomal protein SA	rps-0	25	20	86.6	100	276	30.703		1	1
10	Q9U1Q4	Valine--tRNA ligase	vrs-2	25	27	29.2	100	1050	118.921
11	P34339	Eukaryotic translation initiation factor 3 subunit A	egl-45	22	20	24.9	100	1076	124.408
12	P48152	40S ribosomal protein S3	rps-3	20	18	66	100	247	27.314			1
13	Q9XW17	Cytokinesis, Apoptosis, RNA-associated	car-1	20	16	54.4	100	340	37.61	(Dallaire et al, 2018)	1	1
14	O01802	60S ribosomal protein L7	rpl-7	20	14	50.8	100	244	28.132
15	O02056	60S ribosomal protein L4	rpl-4	20	17	48.1	100	345	38.659			1
16	Q95YF3	ATP-dependent RNA helicase cgh-1	cgh-1	20	19	46	100	430	48.713	(Hammell et al, 2009)
17	P0DM41	RecName: Full=Actin-1/3; Flags: Precursor	act-1	19	16	45.2	33.33	376	41.796
18	P53013	Elongation factor 1-alpha	eft-3	19	15	39.5	100	463	50.668
19	P46561	ATP synthase subunit beta, mitochondrial	atp-2	19	21	36.4	100	538	57.527			1
20	H2KYR1	VIG (Drosophila Vasa Intronic Gene) ortholog	vig-1	17	10	38.1	100	378	40.406	(Caudy et al, 2003)		1
21	Q9U302	Polyadenylate-binding protein	pab-1	16	14	29.1	100	646	71.648	(Flamand et al, 2016)	1	1
22	O44411	Nucleolar GTP-binding protein 1	nog-1	16	15	25.3	100	681	78.487
23	Q93572	60S acidic ribosomal protein P0	rpa-0	15	13	44.6	100	312	33.774			1
24	G5EFG4	ABC transporter, class F	abcf-2	15	14	25.4	100	622	70.38
25	Q86S66	Nascent polypeptide-associated complex subunit alpha	icd-2	14	12	68.5	100	195	21.802			1
26	P48156	40S ribosomal protein S8	rps-8	14	11	57.2	100	208	23.75			1
27	Q9N3X2	40S ribosomal protein S4	rps-4	14	14	49.4	100	259	29.044			1
28	P49405	60S ribosomal protein L5	rpl-5	14	11	43	100	293	33.386
29	P91917	Obg-like ATPase 1	ola-1	14	13	39.7	100	395	44.351
30	P09446	Heat shock 70 kDa protein A	hsp-1	14	14	30.6	100	640	69.723	(Iwasaki et al, 2010)		1
31	P50880	60S ribosomal protein L3	rpl-3	14	12	28.9	100	401	45.659			1
32	Q18688	Heat shock protein 90	daf-21	14	15	21.2	100	702	80.283	(Iwasaki et al, 2010)		1
33	Q19825	Probable arginine--tRNA ligase, cytoplasmic	rrt-1	13	12	23.1	100	713	80.896
34	O01692	40S ribosomal protein S17	rps-17	12	7	53.8	100	130	14.938			1
35	P48154	40S ribosomal protein S3a	rps-1	12	12	40.1	100	257	28.961			1
36	P34690	Tubulin alpha-2 chain	tba-2	12	11	32.6	100	448	49.913
37	P52275	Tubulin beta-2 chain	tbb-2	12	14	29.3	100	450	50.345
38	Q9XXK1	ATP synthase subunit alpha, mitochondrial	H28O16.1	12	11	27.3	100	538	57.788		1	1
39	Q21215	Guanine nucleotide-binding protein subunit beta-2-like 1	rack-1	11	14	44.3	100	325	35.83
40	P47991	60S ribosomal protein L6	rpl-6	11	8	41.9	100	217	24.313
41	Q9N4I4	60S ribosomal protein L10a	rpl-10a	11	8	34.7	100	216	24.137			1
42	O45815	ACTin	act-5	11	9	28.5	100	375	41.873
43	P51403	40S ribosomal protein S2	rps-2	11	12	27.9	100	272	28.96
44	O17921	Tubulin beta chain	tbb-1	11	13	27.4	50	449	50.239
45	H2L2E8	Tubulin alpha chain	tba-1	11	10	26.9	100	454	50.648
46	Q95XR0	Eukaryotic Initiation Factor	eif-2gamma	11	9	25.2	100	469	51.234
47	P50432	Serine hydroxymethyltransferase	mel-32	11	12	24.9	100	507	55.765
48	Q03577	Aspartate--tRNA ligase, cytoplasmic	drs-1	11	10	24.1	100	531	59.939
49	Q9NLD1	HnRNP A1 homolog	hrp-2	11	11	23.2	100	611	65.92
50	Q20206	Ribosomal Protein, Small subunit	rps-11	10	8	44.5	100	155	17.745
51	Q95Y90	60S ribosomal protein L9	rpl-9	10	7	43.9	100	189	21.508
52	Q20228	40S ribosomal protein S9	rps-9	10	8	38.6	100	189	21.957
53	Q9XVF7	60S ribosomal protein L8	rpl-8	10	10	38.1	100	260	28.204			1
54	P34183	Histidine--tRNA ligase	hrs-1	10	11	27.6	100	521	58.559
55	G5ECM6	Elongation factor Tu homologue	tufm-1	10	9	22.6	100	496	54.635
56	Q20363	Stress-induced protein 1	sip-1	9	7	56.6	100	159	17.839		1	1
57	P91306	C. Elegans Y-box	cey-2	9	7	47.2	100	267	29.405	(Dallaire et al, 2018)	1	1
58	O18240	Ribosomal Protein, Small subunit	rps-18	9	10	37.7	100	154	17.771			1
59	Q22716	Ribosomal Protein, Large subunit	rpl-32	9	8	36.6	100	134	15.516
60	Q09533	60S ribosomal protein L10	rpl-10	9	8	32.2	100	214	24.749
61	Q966C6	60S ribosomal protein L7a	rpl-7A	9	9	28.3	100	265	30.174			1
62	Q9NEN6	40S ribosomal protein S6	rps-6	9	10	28	100	246	28.136
63	O45865	Adenine Nucleotide Translocator	ant-1.1	9	9	27	100	300	33.045
64	P47207	T-complex protein 1 subunit beta	cct-2	9	9	24.4	100	529	56.975
65	Q8WQA8	Ribosomal Protein, Small subunit	rps-20	8	7	53	100	117	13.234			1
66	P49041	40S ribosomal protein S5	rps-5	8	9	48.6	100	210	23.155
67	O44480	60S ribosomal protein L18a	rpl-20	8	8	37.8	100	180	20.959			1
68	Q9BL19	60S ribosomal protein L17	rpl-17	8	6	35.8	100	187	21.513
69	P34460	Probable elongation factor 1-beta/1-delta 1	eef-1B.1	8	8	35.7	100	213	22.704			1
70	Q93714	Probable isocitrate dehydrogenase [NAD] subunit alpha, mitochondrial	idha-1	8	8	35.2	100	358	38.466
71	Q11067	Protein disulfide-isomerase A6 homolog	tag-320	8	7	28.9	100	440	47.728		1
72	Q9U2H9	Probable elongation factor 1-beta/1-delta 2	eef-1B.2	8	8	28.1	100	263	28.173		1
73	P27604	Adenosylhomocysteinase	ahcy-1	8	8	23.8	100	437	47.536
74	Q22053	rRNA 2'-O-methyltransferase fibrillarin	fib-1	8	8	20.2	100	352	36.383
75	Q95QW0	Eukaryotic translation initiation factor 3 subunit L	eif-3.L	8	7	20.1	100	537	62.476
76	Q9XWS4	Ribosomal Protein, Large subunit	rpl-30	7	6	45.2	100	115	12.437
77	O17218	Ribosomal Protein, Small subunit	rps-22	7	7	44.6	100	130	14.733
78	Q22054	40S ribosomal protein S16	rps-16	7	7	41.7	100	144	16.316
79	P91128	60S ribosomal protein L13	rpl-13	7	7	36.7	100	207	23.753
80	O45946	60S ribosomal protein L18	rpl-18	7	6	36.2	100	188	20.996			1
81	Q9XVP0	40S ribosomal protein S15	rps-15	7	6	29.8	100	151	17.244			1
82	Q21752	Probable voltage-dependent anion-selective channel	vdac-1	7	6	29	100	283	29.961			1
83	Q9BKU3	Eukaryotic Initiation Factor	eif-2alpha	7	7	27.5	100	342	38.898
84	Q9N5B3	Uncharacterized protein	CELE_W08E12.7	7	8	22.8	100	391	43.033
85	O61820	Eukaryotic translation initiation factor 3 subunit E	eif-3.E	7	8	22	100	432	50.72
86	O16368	Probable 26S proteasome regulatory subunit 4	rpt-2	7	7	21	100	443	49.723
87	O44549	Acyl CoA DeHydrogenase	acdh-3	7	8	20	100	419	45.776
88	P49197	40S ribosomal protein S21	rps-21	6	5	48.9	100	88	9.675			1
89	Q9TYS3	Ferritin	ftn-2	6	5	40.6	100	170	19.593
90	P48158	60S ribosomal protein L23	rpl-23	6	7	36.4	100	140	14.955
91	Q23312	40S ribosomal protein S7	rps-7	6	6	31.4	100	194	22.058
92	P48150	40S ribosomal protein S14	rps-14	6	7	30.9	100	152	16.249
93	P51404	40S ribosomal protein S13	rps-13	6	6	30.5	100	151	17.316
94	Q19869	60S ribosomal protein L26	rpl-26	6	5	28.9	100	142	16.075
95	P27798	Calreticulin	crt-1	6	5	27.3	100	395	45.616
96	Q27389	60S ribosomal protein L13a	rpl-16	6	5	23.8	100	202	22.994
97	Q19437	UreidoPropionase Beta	upb-1	6	6	23.3	100	387	43.197
98	P91374	60S ribosomal protein L15	rpl-15	6	5	22.5	100	204	24.125
99	Q20774	DNaJ domain (Prokaryotic heat shock protein)	dnj-13	6	6	20.2	100	331	36.265
100	P46502	Probable 26S proteasome regulatory subunit 6B	rpt-3	6	6	20	100	414	46.358
101	P49181	60S ribosomal protein L36	rpl-36	5	6	45.2	100	104	11.884			1
102	Q18885	Transcription factor BTF3 homolog	icd-1	5	5	44.1	100	161	17.503			1
103	Q20964	LYSozyme	lys-4	5	5	35.5	100	214	23.608
104	Q21930	60S ribosomal protein L28	rpl-28	5	5	29.4	100	126	13.725
105	Q9BKU5	Uncharacterized protein	CELE_Y37E3.8	5	5	29	100	145	16.204
106	P91398	C. Elegans Y-box	cey-3	5	6	26	100	265	29.244	(Dallaire et al, 2018)	1
107	Q21481	DeHydrogenases, Short chain	dhs-28	5	5	21.3	100	436	46.263
108	Q9N362	Uncharacterized protein	CELE_Y55F3AM.13	5	5	20.9	100	354	38.458
109	Q4W5P0	Homologous to Drosophila SQD (Squid) protein	sqd-1	5	5	20.8	100	308	33.674		1
110	P42168	Casein kinase I isoform alpha	kin-19	5	5	20.5	100	341	39.037
111	Q27535	Probable arginine kinase ZC434.8	ZC434.8	5	6	20	100	360	40.382
112	P49180	60S ribosomal protein L35a	rpl-33	4	6	34.7	100	124	13.768
